# Supplementary material for: Gene coexpression networks reveal key drivers of phenotypic divergence in porcine muscle
Source: PubMed Central journal article supplement (PMC4328970; doi:10.1186/s12864-015-1238-5), 2015-02-05
Supplement: 12864_2015_1238_MOESM1_ESM.pdf [file 12864_2015_1238_MOESM1_ESM.pdf]

Table S1-1 Summary of all modules and their parameters of LDE prenatal.

| Module      | Freq | PC1_Var   | Min_TO    | Max_COR   | Density   | Tree_order |
|-------------|------|-----------|-----------|-----------|-----------|------------|
| black       | 61   | 0.847755  | 0.4562256 | 0.999712  | 0.4198118 | 1          |
| grey60      | 39   | 0.9503686 | 0.4740164 | 0.9998951 | 0.4774982 | 2          |
| grey        | 49   | 0.5132573 | 0.4850699 | 0.9992925 | 0.1852281 | 3          |
| salmon      | 45   | 0.8717378 | 0.4578818 | 0.9991979 | 0.4295504 | 4          |
| pink        | 59   | 0.9258893 | 0.4082066 | 0.9997321 | 0.5184597 | 5          |
| green       | 89   | 0.7934244 | 0.3785996 | 0.9998728 | 0.4183458 | 6          |
| midnightblu | 42   | 0.9615473 | 0.3779887 | 0.999761  | 0.5844929 | 7          |
| red         | 64   | 0.9314472 | 0.3892089 | 0.9998089 | 0.5415761 | 8          |
| navy        | 45   | 0.9029569 | 0.4503008 | 1         | 0.472216  | 9          |
| greenyellow | 50   | 0.5715346 | 0.4827451 | 0.9992722 | 0.1869076 | 10         |
| royalblue   | 33   | 0.9292506 | 0.4880899 | 0.9991953 | 0.4565705 | 11         |
| brown       | 177  | 0.8722138 | 0.4151683 | 0.9999713 | 0.4617138 | 12         |
| lightcyan   | 42   | 0.7473861 | 0.5235713 | 0.9997069 | 0.3053057 | 13         |
| lightyellow | 36   | 0.8827629 | 0.4994704 | 0.9997471 | 0.4078755 | 14         |
| magenta     | 54   | 0.9414638 | 0.4482136 | 0.9998062 | 0.4666865 | 15         |
| yellow      | 138  | 0.809274  | 0.4862307 | 0.9996832 | 0.3540754 | 16         |
| purple      | 54   | 0.8252491 | 0.4752626 | 0.9992828 | 0.3442903 | 17         |
| darkturquoi | 27   | 0.8538651 | 0.4893295 | 0.9973522 | 0.3531297 | 18         |
| tan         | 50   | 0.930918  | 0.414812  | 0.9997358 | 0.5097721 | 19         |
| darkgreen   | 31   | 0.8995778 | 0.4121452 | 0.999148  | 0.4749301 | 20         |
| blue        | 194  | 0.9204767 | 0.3747012 | 0.9999377 | 0.5422207 | 21         |
| turquoise   | 2183 | 0.8227848 | 0.1341299 | 1         | 0.6868792 | 22         |
| lightgreen  | 37   | 0.6499104 | 0.5893286 | 0.9999727 | 0.1876737 | 23         |
| darkred     | 32   | 0.6991279 | 0.6498156 | 0.9987959 | 0.16837   | 24         |

Table S1-2 Summary of all modules and their parameters of LDE postnatal.

| Module       | Freq | PC1_Var   | Min_TO    | Max_COR   | Density   | Tree_order |
|--------------|------|-----------|-----------|-----------|-----------|------------|
| pink         | 158  | 0.9810339 | 0.2316582 | 1         | 0.7362309 | 14         |
| red          | 137  | 0.9753795 | 0.2429791 | 1         | 0.7317501 | 15         |
| darkgrey     | 62   | 0.9566825 | 0.2578196 | 0.9998767 | 0.704993  | 13         |
| grey60       | 78   | 0.9582232 | 0.332907  | 0.9999389 | 0.6208285 | 26         |
| midnightblu  | 87   | 0.9663096 | 0.3371629 | 0.9999419 | 0.6087564 | 19         |
| salmon       | 90   | 0.9460452 | 0.3658081 | 1         | 0.5783936 | 29         |
| yellow       | 172  | 0.9018443 | 0.3270557 | 0.9999424 | 0.572269  | 25         |
| black        | 120  | 0.965186  | 0.3841767 | 0.9999919 | 0.5696409 | 21         |
| green        | 139  | 0.9312421 | 0.357461  | 0.9999836 | 0.5609609 | 18         |
| royalblue    | 73   | 0.9560256 | 0.4041474 | 0.9999691 | 0.5536606 | 5          |
| skyblue      | 51   | 0.9542876 | 0.4225319 | 0.999996  | 0.5455539 | 11         |
| blue         | 189  | 0.9138188 | 0.3478074 | 0.9999928 | 0.5451768 | 20         |
| lightyellow  | 76   | 0.9398845 | 0.4121325 | 0.9998747 | 0.5283844 | 4          |
| purple       | 101  | 0.9075914 | 0.3608833 | 0.9998024 | 0.5250488 | 32         |
| magenta      | 110  | 0.9056494 | 0.4167575 | 0.9998518 | 0.510229  | 6          |
| darkturquoi  | 64   | 0.8789288 | 0.3990456 | 1         | 0.4796635 | 24         |
| grey         | 20   | 0.9072864 | 0.4431668 | 0.9999707 | 0.4744381 | 9          |
| brown        | 186  | 0.8383873 | 0.3947422 | 0.9999837 | 0.4707019 | 3          |
| lightcyan    | 85   | 0.8667667 | 0.4339632 | 0.999867  | 0.4582715 | 8          |
| white        | 72   | 0.7914479 | 0.2313004 | 0.9999962 | 0.4173313 | 17         |
| darkred      | 73   | 0.8043369 | 0.3919687 | 0.9997368 | 0.4050453 | 28         |
| paleturquois | 39   | 0.8872046 | 0.4958577 | 0.9993934 | 0.3977021 | 30         |
| darkgreen    | 73   | 0.7774061 | 0.3917048 | 0.9999712 | 0.3911474 | 31         |
| orange       | 60   | 0.803238  | 0.4295227 | 1         | 0.3863773 | 7          |
| lightgreen   | 77   | 0.7606187 | 0.4373364 | 0.9999982 | 0.3671703 | 10         |
| turquoise    | 541  | 0.6089392 | 0.2715343 | 0.9999945 | 0.3502898 | 12         |
| violet       | 83   | 0.7796454 | 0.2402957 | 1         | 0.2949356 | 16         |
| darkorange   | 59   | 0.7936951 | 0.5104428 | 0.9992878 | 0.2746057 | 27         |
| tan          | 90   | 0.7559772 | 0.5507977 | 0.9993051 | 0.244862  | 1          |
| greenyellow  | 92   | 0.5952734 | 0.4638785 | 0.9996641 | 0.2443304 | 23         |
| navy         | 110  | 0.5965289 | 0.2532651 | 1         | 0.1928733 | 2          |
| darkmagent   | 22   | 0.7512989 | 0.6638631 | 0.9997978 | 0.1369532 | 22         |

Table S1-3 Summary of all modules and their parameters of LT prenatal.

| Module      | Freq | PC1_Var   | Min_TO    | Max_COR   | Density   | Tree_order |
|-------------|------|-----------|-----------|-----------|-----------|------------|
| blue        | 261  | 0.9005179 | 0.3483671 | 1         | 0.541041  | 8          |
| turquoise   | 1417 | 0.8398105 | 0.174814  | 1         | 0.63974   | 35         |
| darkturquoi | 39   | 0.9202871 | 0.4052916 | 0.999923  | 0.4808496 | 4          |
| purple      | 69   | 0.9584632 | 0.3922852 | 0.9999067 | 0.5654861 | 19         |
| green       | 115  | 0.9254245 | 0.4436122 | 0.9998986 | 0.460445  | 34         |
| brown       | 142  | 0.8929812 | 0.4296307 | 0.9998734 | 0.4364474 | 21         |
| black       | 77   | 0.8786501 | 0.4725467 | 0.9998534 | 0.4027008 | 33         |
| darkred     | 41   | 0.9607883 | 0.4024963 | 0.9998248 | 0.5378638 | 5          |
| grey        | 34   | 0.5209626 | 0.5904118 | 0.9998011 | 0.1625959 | 12         |
| skyblue     | 33   | 0.9182154 | 0.496891  | 0.9997632 | 0.4235548 | 26         |
| sienna3     | 23   | 0.9536893 | 0.4899955 | 0.9997439 | 0.4535686 | 23         |
| pink        | 105  | 0.5002351 | 0.5101938 | 0.9997377 | 0.107591  | 10         |
| greenyellow | 66   | 0.8517739 | 0.4055984 | 0.9997362 | 0.458934  | 17         |
| yellowgreer | 22   | 0.9375686 | 0.4224674 | 0.9997324 | 0.5275564 | 18         |
| darkgreen   | 62   | 0.5144787 | 0.4624105 | 0.9997311 | 0.2033513 | 15         |
| lightyellow | 44   | 0.913123  | 0.4518834 | 0.9997225 | 0.4427861 | 6          |
| darkmagent  | 24   | 0.8618092 | 0.6058346 | 0.9996784 | 0.2896591 | 29         |
| navy        | 79   | 0.674292  | 0.458213  | 0.9996643 | 0.2363878 | 3          |
| yellow      | 132  | 0.7415002 | 0.5299141 | 0.9996272 | 0.2744862 | 11         |
| magenta     | 93   | 0.5185746 | 0.4725088 | 0.9996217 | 0.1962893 | 2          |
| lightcyan   | 51   | 0.9168062 | 0.4796412 | 0.9996135 | 0.4432369 | 25         |
| tan         | 60   | 0.908904  | 0.5060209 | 0.9996077 | 0.392378  | 24         |
| royalblue   | 43   | 0.6668555 | 0.581284  | 0.9995997 | 0.185259  | 28         |
| white       | 56   | 0.5683779 | 0.4038855 | 0.9995816 | 0.2769348 | 7          |
| salmon      | 60   | 0.9100359 | 0.4975263 | 0.9994959 | 0.427801  | 32         |
| skyblue3    | 22   | 0.9347778 | 0.5388459 | 0.9994379 | 0.3773428 | 27         |
| midnightblu | 51   | 0.8966745 | 0.5060103 | 0.9993965 | 0.3786119 | 9          |
| darkorange  | 35   | 0.9618457 | 0.4362885 | 0.9993595 | 0.4995416 | 16         |
| violet      | 57   | 0.6718741 | 0.47711   | 0.9991757 | 0.1429144 | 20         |
| orange      | 37   | 0.5273219 | 0.5358947 | 0.9990643 | 0.1741324 | 22         |
| darkgrey    | 39   | 0.5712759 | 0.5742534 | 0.9989653 | 0.170726  | 30         |
| red         | 86   | 0.633063  | 0.5825643 | 0.9987991 | 0.2134371 | 14         |
| grey60      | 50   | 0.5386871 | 0.5681801 | 0.9983891 | 0.1766869 | 31         |
| lightgreen  | 47   | 0.816093  | 0.6128843 | 0.9980298 | 0.2505689 | 1          |
| paleturquoi | 26   | 0.8459702 | 0.5883147 | 0.9970693 | 0.2782481 | 13         |

Table S1-4 Summary of all modules and their parameters of LT postnatal.

| Module      | Freq | PC1_Var   | Min_TO    | Max_COR   | Density   | Density_<br>index | Tree_order |
|-------------|------|-----------|-----------|-----------|-----------|-------------------|------------|
| lightyellow | 66   | 0.9910363 | 0.2386506 | 0.9999958 | 0.7479792 | 5.4225585         | 33         |
| sienna3     | 28   | 0.9871024 | 0.2421022 | 0.9999002 | 0.7428563 | 5.3854192         | 34         |
| violet      | 79   | 0.987148  | 0.2414932 | 1         | 0.7402272 | 5.3663595         | 32         |
| grey60      | 68   | 0.9809624 | 0.2414317 | 0.9999492 | 0.7316343 | 5.3040637         | 31         |
| darkmagent  | 31   | 0.9704914 | 0.2534457 | 0.9999493 | 0.7211378 | 5.2279685         | 30         |
| black       | 108  | 0.9704392 | 0.2492331 | 0.9999919 | 0.7191221 | 5.2133553         | 29         |
| tan         | 78   | 0.9570796 | 0.2615006 | 0.999899  | 0.6972834 | 5.0550335         | 28         |
| lightgreen  | 66   | 0.9780811 | 0.3545265 | 1         | 0.6121065 | 4.4375341         | 4          |
| blue        | 348  | 0.886449  | 0.2697177 | 0.9999639 | 0.6007785 | 4.3554107         | 27         |
| magenta     | 96   | 0.9424085 | 0.3602905 | 0.9999828 | 0.5775385 | 4.1869297         | 18         |
| yellow      | 164  | 0.8685782 | 0.3559183 | 1         | 0.5080697 | 3.6833077         | 3          |
| red         | 131  | 0.9359852 | 0.419599  | 0.9998798 | 0.4933262 | 3.5764227         | 24         |
| darkred     | 60   | 0.8890597 | 0.4161513 | 0.9992738 | 0.4496018 | 3.2594384         | 6          |
| darkgreen   | 57   | 0.8414891 | 0.4082556 | 0.9998435 | 0.4308618 | 3.1235807         | 5          |
| orange      | 44   | 0.9263049 | 0.4757554 | 0.9985796 | 0.4244731 | 3.0772651         | 25         |
| turquoise   | 543  | 0.6998872 | 0.2756069 | 0.999938  | 0.4224378 | 3.0625094         | 26         |
| yellowgreer | 24   | 0.9234479 | 0.5355965 | 0.998141  | 0.40552   | 2.9398624         | 12         |
| greenyellow | 78   | 0.8575255 | 0.5027646 | 0.9996288 | 0.3711036 | 2.6903565         | 11         |
| skyblue     | 42   | 0.9104009 | 0.5331329 | 0.9999157 | 0.3692172 | 2.6766808         | 20         |
| lightcyan   | 73   | 0.751225  | 0.4325327 | 0.9996656 | 0.3621938 | 2.6257642         | 17         |
| darkgrey    | 50   | 0.8417537 | 0.5083142 | 0.9999587 | 0.3451191 | 2.5019789         | 7          |
| darkturquoi | 50   | 0.8608001 | 0.5036625 | 0.9988274 | 0.3442425 | 2.4956239         | 2          |
| midnightblu | 73   | 0.7920277 | 0.5057456 | 0.9993159 | 0.3075535 | 2.2296429         | 10         |
| salmon      | 76   | 0.8620401 | 0.5691738 | 0.9993406 | 0.307082  | 2.2262249         | 21         |
| paleturquoi | 37   | 0.8199537 | 0.525986  | 0.9979774 | 0.3044187 | 2.2069171         | 14         |
| pink        | 138  | 0.6885435 | 0.3700147 | 1         | 0.299072  | 2.1681555         | 9          |
| white       | 73   | 0.558945  | 0.2543592 | 0.9999786 | 0.2559738 | 1.8557102         | 8          |
| royalblue   | 65   | 0.674809  | 0.4833357 | 0.9996327 | 0.2497974 | 1.8109342         | 23         |
| darkorange  | 42   | 0.6908029 | 0.5465729 | 0.9992081 | 0.2412209 | 1.7487579         | 1          |
| green       | 141  | 0.6341449 | 0.5452966 | 0.9995913 | 0.2164624 | 1.5692685         | 15         |
| brown       | 176  | 0.5474794 | 0.4056553 | 0.99978   | 0.2120038 | 1.5369448         | 16         |
| navy        | 109  | 0.6099034 | 0.5326865 | 1         | 0.1737145 | 1.2593622         | 19         |
| grey        | 55   | 0.5792981 | 0.5236668 | 0.9980123 | 0.1379384 | 1                 | 13         |
| purple      | 80   | 0.6083508 | 0.628406  | 0.9994714 | 0.1148295 | 0.8324689         | 22         |

Table S2-1 Attributes of genes in all modules of LDE prenatal.

| GeneSymbol                         | Module        | kTotal | kWithin | eigcorr  | eigenpval | meanExpr |
|------------------------------------|---------------|--------|---------|----------|-----------|----------|
| gi 10304379 gb AF288822.1 AF288822 | turquoise     | 335.35 | 323.703 | 0.644397 | 0.240513  | 41.59    |
| gi 106073315 gb DQ508264.1         | green         | 127.07 | 18.0861 | 0.730541 | 0.160949  | 1.25     |
| gi 108796051 ref NM_213912.2       | darkturquoise | 235.38 | 17.2808 | 0.982419 | 0.002791  | 274.918  |
| gi 108796069 ref NM_001042375.1    | green         | 151.98 | 39.6258 | 0.934073 | 0.020118  | 395.418  |
| gi 109639160 ref NM_001025222.2    | green         | 235.37 | 52.931  | 0.978592 | 0.003748  | 211.948  |
| gi 109639161 ref NM_001006593.2    | brown         | 244.98 | 118.202 | 0.975424 | 0.004608  | 30.324   |
| gi 112181313 ref NM_214438.2       | navy          | 242.34 | 31.7399 | 0.982611 | 0.002745  | 450.918  |
| gi 113205497 ref NM_001044527.1    | green         | 241.36 | 53.7763 | 0.989651 | 0.001262  | 428.998  |
| gi 113205555 ref NM_001044525.1    | turquoise     | 1274.5 | 1273.28 | 0.953966 | 0.011774  | 22.26    |
| gi 113205565 ref NM_001044529.1    | blue          | 280.5  | 135.467 | 0.964125 | 0.008113  | 20.234   |
| gi 113205585 ref NM_001044535.1    | darkturquoise | 137.28 | 7.1262  | 0.749571 | 0.144655  | 37.066   |
| gi 113205597 ref NM_001044537.1    | yellow        | 108.18 | 42.0523 | 0.81642  | 0.091778  | 18.194   |
| gi 113205623 ref NM_001044545.1    | grey60        | 235.12 | 31.1664 | 0.98408  | 0.002406  | 236.636  |
| gi 113205635 ref NM_001044548.1    | blue          | 297.08 | 140.656 | 0.972952 | 0.005318  | 17.346   |
| gi 113205649 ref NM_001044550.1    | green         | 179.47 | 48.2775 | 0.980732 | 0.003201  | 41.604   |
| gi 113205651 ref NM_001044553.1    | turquoise     | 662.23 | 659.552 | 0.806528 | 0.099137  | 24.964   |
| gi 113205653 ref NM_001044551.1    | royalblue     | 267.11 | 19.3794 | 0.923517 | 0.025098  | 21.472   |
| gi 113205675 ref NM_001044558.1    | turquoise     | 1081.5 | 1080.46 | 0.909053 | 0.032472  | 18.144   |
| gi 113205761 ref NM_001044578.1    | turquoise     | 1149.8 | 1147.98 | 0.929864 | 0.022061  | 60.598   |
| gi 113205811 ref NM_001044593.1    | yellow        | 145.01 | 53.9093 | 0.866982 | 0.057061  | 320.802  |
| gi 113205825 ref NM_001044594.1    | green         | 221.3  | 47.2423 | 0.940534 | 0.017251  | 21.02    |
| gi 113205849 ref NM_001044600.1    | turquoise     | 1233.6 | 1232.35 | 0.947337 | 0.014392  | 11.814   |
| gi 113205859 ref NM_001044605.1    | pink          | 222.67 | 45.6059 | 0.988435 | 0.00149   | 41.894   |
| gi 113205873 ref NM_001044606.1    | magenta       | 333.13 | 43.7934 | 0.991024 | 0.001019  | 144.146  |
| gi 113205905 ref NM_001044614.1    | turquoise     | 793.04 | 790.676 | 0.832365 | 0.080288  | 47.386   |
| gi 113205907 ref NM_001044616.1    | pink          | 194.86 | 44.9686 | 0.985195 | 0.002158  | 21.004   |
| gi 113205929 ref NM_001044620.1    | brown         | 249.04 | 124.819 | 0.988938 | 0.001394  | 179.71   |
| gi 113931658 ref NM_001044598.2    | turquoise     | 1553.6 | 1553.18 | 0.996528 | 0.000245  | 2.692    |
| gi 114326182 ref NM_001048072.1    | turquoise     | 1568.8 | 1568.42 | 0.999113 | 3.17E-05  | 191.378  |
| gi 114326213 ref NM_001048069.1    | darkturquoise | 166.69 | 17.7127 | 0.991355 | 0.000964  | 78.646   |
| gi 114703735 ref NM_001048187.1    | midnightblue  | 244.76 | 36.201  | 0.994421 | 0.0005    | 6.374    |
| gi 115312275 ref NM_001048232.1    | turquoise     | 1451.6 | 1451.14 | 0.979289 | 0.003567  | 2.016    |
| gi 115545523 dbj AK230638.1        | magenta       | 337.17 | 43.5469 | 0.989168 | 0.001351  | 23.196   |
| gi 115545530 dbj AK230645.1        | turquoise     | 1236.5 | 1235.71 | 0.938947 | 0.017942  | 11.15    |
| gi 115545542 dbj AK230657.1        | lightyellow   | 192.01 | 15.9105 | 0.851769 | 0.066964  | 168.954  |
| gi 115545566 dbj AK230681.1        | magenta       | 332.28 | 44.9916 | 0.996192 | 0.000282  | 161.62   |
| gi 115545596 dbj AK230711.1        | royalblue     | 139.59 | 19.4675 | 0.927376 | 0.023236  | 2.812    |
| gi 115545597 dbj AK230712.1        | turquoise     | 1463.8 | 1463.18 | 0.983906 | 0.002445  | 42.424   |
| gi 115545598 dbj AK230713.1        | turquoise     | 1548.3 | 1547.95 | 0.995305 | 0.000386  | 12.808   |
| gi 115545600 dbj AK230715.1        | red           | 265.89 | 45.0549 | 0.95967  | 0.009663  | 77.63    |
| gi 115545604 dbj AK230719.1        | turquoise     | 1439.8 | 1439.19 | 0.979871 | 0.003418  | 2.628    |
| gi 115545622 dbj AK230737.1        | turquoise     | 809.13 | 807.577 | 0.847385 | 0.069908  | 32.576   |
| gi 115545643 dbj AK230758.1        | turquoise     | 1489.1 | 1488.41 | 0.989022 | 0.001378  | 56.918   |
| gi 115545669 dbj AK230784.1        | brown         | 145.89 | 77.0327 | 0.861295 | 0.060705  | 69.388   |
| gi 115545681 dbj AK230796.1        | turquoise     | 137.83 | 58.5181 | 0.208284 | 0.736735  | 32.984   |
| gi 115545734 dbj AK234167.1        | turquoise     | 1050.5 | 1049.46 | 0.901285 | 0.036675  | 1.09     |

|                             |              |        |         |          |          |         |
|-----------------------------|--------------|--------|---------|----------|----------|---------|
| gi 115545741 dbj AK234174.1 | turquoise    | 816.27 | 815.513 | 0.858606 | 0.062452 | 31.632  |
| gi 115545742 dbj AK234175.1 | greenyellow  | 201.7  | 22.9102 | 0.986741 | 0.001829 | 8.424   |
| gi 115545749 dbj AK234182.1 | black        | 281.21 | 42.8926 | 0.998702 | 5.61E-05 | 36.86   |
| gi 115545756 dbj AK234189.1 | turquoise    | 1504.4 | 1503.92 | 0.988132 | 0.001549 | 4.612   |
| gi 115545757 dbj AK234190.1 | turquoise    | 391.91 | 386.049 | 0.671127 | 0.214881 | 22.106  |
| gi 115545765 dbj AK234198.1 | yellow       | 303.25 | 62.457  | 0.892123 | 0.041838 | 84.382  |
| gi 115545780 dbj AK234213.1 | turquoise    | 1500.8 | 1500.26 | 0.990298 | 0.001146 | 7.072   |
| gi 115545783 dbj AK234216.1 | turquoise    | 1340.1 | 1339.44 | 0.958092 | 0.010233 | 3.852   |
| gi 115545785 dbj AK234218.1 | turquoise    | 1391.3 | 1390.76 | 0.972035 | 0.00559  | 17.362  |
| gi 115545812 dbj AK234245.1 | blue         | 267.94 | 129.718 | 0.953736 | 0.011862 | 48      |
| gi 115545821 dbj AK234254.1 | blue         | 308.67 | 151.192 | 0.989463 | 0.001296 | 54.512  |
| gi 115545827 dbj AK234260.1 | turquoise    | 1439.6 | 1438.82 | 0.981099 | 0.003111 | 32.232  |
| gi 115545844 dbj AK234277.1 | grey60       | 246.09 | 32.6347 | 0.994248 | 0.000523 | 205.5   |
| gi 115545853 dbj AK234286.1 | turquoise    | 505.92 | 501.468 | 0.749889 | 0.144387 | 24.61   |
| gi 115545859 dbj AK234292.1 | turquoise    | 552.02 | 543.257 | 0.749311 | 0.144874 | 80.23   |
| gi 115545865 dbj AK234298.1 | turquoise    | 1460.2 | 1459.49 | 0.982619 | 0.002744 | 3.392   |
| gi 115545868 dbj AK234301.1 | turquoise    | 1430.2 | 1429.4  | 0.979799 | 0.003436 | 44.586  |
| gi 115545894 dbj AK234327.1 | turquoise    | 814.68 | 811.682 | 0.848239 | 0.069332 | 38.908  |
| gi 115545900 dbj AK234333.1 | turquoise    | 1523.6 | 1523.04 | 0.993519 | 0.000626 | 61.454  |
| gi 115545908 dbj AK234341.1 | turquoise    | 326.87 | 306.329 | 0.600303 | 0.284449 | 110.692 |
| gi 115545914 dbj AK234347.1 | turquoise    | 975.91 | 973.158 | 0.890631 | 0.042699 | 12.63   |
| gi 115545916 dbj AK234349.1 | lightgreen   | 42.479 | 11.905  | 0.816704 | 0.091569 | 13.662  |
| gi 115545921 dbj AK237362.1 | turquoise    | 1214.9 | 1213.15 | 0.940477 | 0.017276 | 74.556  |
| gi 115545930 dbj AK237371.1 | turquoise    | 1279.9 | 1278.52 | 0.952478 | 0.012347 | 39.69   |
| gi 115545949 dbj AK237390.1 | turquoise    | 830.3  | 826.916 | 0.855621 | 0.06441  | 44.838  |
| gi 115545973 dbj AK237414.1 | midnightblue | 229.84 | 36.5081 | 0.996251 | 0.000275 | 101.384 |
| gi 115545984 dbj AK237425.1 | red          | 248.18 | 50.9308 | 0.989623 | 0.001267 | 32.564  |
| gi 115546047 dbj AK237489.1 | royalblue    | 223.68 | 24.079  | 0.976332 | 0.004356 | 26.984  |
| gi 115546071 dbj AK237513.1 | turquoise    | 174.67 | 81.9318 | 0.224002 | 0.717195 | 55.918  |
| gi 115546075 dbj AK237517.1 | purple       | 201.11 | 31.5106 | 0.962323 | 0.008729 | 40.392  |
| gi 115546083 dbj AK237525.1 | turquoise    | 1368.6 | 1367.73 | 0.969607 | 0.006331 | 34.53   |
| gi 115546137 dbj AK240375.1 | turquoise    | 261.25 | 222.177 | 0.511441 | 0.378436 | 7.742   |
| gi 115546138 dbj AK240376.1 | turquoise    | 120.33 | 92.1125 | 0.333295 | 0.583629 | 220.41  |
| gi 115546153 dbj AK240391.1 | greenyellow  | 77.704 | 6.38123 | -0.57003 | 0.315701 | 15.196  |
| gi 115546179 dbj AK240417.1 | brown        | 313.56 | 102.822 | 0.928412 | 0.022744 | 17.832  |
| gi 115546190 dbj AK240428.1 | turquoise    | 1359.1 | 1358.35 | 0.962583 | 0.008639 | 5.748   |
| gi 115546201 dbj AK240439.1 | yellow       | 163.5  | 50.0297 | 0.844995 | 0.07153  | 63.814  |
| gi 115546222 dbj AK240460.1 | grey         | 76.416 | 8.32889 | -0.0098  | 0.987526 | 34.832  |
| gi 115546238 dbj AK240476.1 | turquoise    | 1473.2 | 1472.75 | 0.985808 | 0.002025 | 5.86    |
| gi 115546241 dbj AK240479.1 | turquoise    | 199.15 | 186.146 | 0.509009 | 0.381099 | 90.79   |
| gi 115546260 dbj AK240498.1 | turquoise    | 1121.1 | 1119.93 | 0.916154 | 0.028775 | 28.842  |
| gi 115546268 dbj AK240506.1 | turquoise    | 1505.4 | 1504.82 | 0.990893 | 0.001042 | 4.316   |
| gi 115546292 dbj AK240530.1 | turquoise    | 193.64 | 176.922 | 0.496044 | 0.39537  | 16.106  |
| gi 115546313 dbj AK240551.1 | turquoise    | 179.44 | 115.323 | 0.335119 | 0.581441 | 50.758  |
| gi 115546315 dbj AK240553.1 | turquoise    | 1319.7 | 1318.93 | 0.954827 | 0.011447 | 25.808  |
| gi 115546324 dbj AK230843.1 | turquoise    | 344.69 | 321.358 | 0.615661 | 0.268923 | 68.718  |
| gi 115546327 dbj AK230846.1 | turquoise    | 1497.1 | 1496.64 | 0.986084 | 0.001966 | 3.65    |
| gi 115546331 dbj AK230850.1 | salmon       | 236.82 | 26.3498 | 0.950147 | 0.013261 | 85.292  |

|                             |              |        |         |          |          |         |
|-----------------------------|--------------|--------|---------|----------|----------|---------|
| gi 115546371 dbj AK230890.1 | blue         | 330.28 | 138.118 | 0.969883 | 0.006246 | 99.04   |
| gi 115546413 dbj AK230932.1 | turquoise    | 1557.8 | 1557.4  | 0.997983 | 0.000109 | 4.284   |
| gi 115546432 dbj AK230951.1 | turquoise    | 1553.6 | 1553.18 | 0.996528 | 0.000245 | 1.654   |
| gi 115546438 dbj AK230957.1 | turquoise    | 1539.4 | 1538.91 | 0.994368 | 0.000507 | 80.016  |
| gi 115546439 dbj AK230958.1 | turquoise    | 99.433 | 87.6827 | 0.373508 | 0.535736 | 7.58    |
| gi 115546451 dbj AK230970.1 | turquoise    | 1427.6 | 1427.12 | 0.974877 | 0.004762 | 22.304  |
| gi 115546452 dbj AK230971.1 | turquoise    | 676.84 | 672.773 | 0.805173 | 0.100159 | 23.234  |
| gi 115546454 dbj AK230973.1 | turquoise    | 1460.4 | 1459.69 | 0.983802 | 0.002469 | 67.054  |
| gi 115546460 dbj AK230979.1 | turquoise    | 1413.5 | 1412.97 | 0.976715 | 0.00425  | 16.668  |
| gi 115546462 dbj AK230981.1 | blue         | 308.08 | 145.717 | 0.980901 | 0.003159 | 21.856  |
| gi 115546465 dbj AK230984.1 | navy         | 227.21 | 23.8321 | 0.92011  | 0.026779 | 177.574 |
| gi 115546507 dbj AK231026.1 | brown        | 213.82 | 107.375 | 0.952091 | 0.012497 | 6.882   |
| gi 115546529 dbj AK234367.1 | turquoise    | 272.89 | 234.783 | 0.51532  | 0.374197 | 92.414  |
| gi 115546548 dbj AK234386.1 | brown        | 212.62 | 120.255 | 0.98139  | 0.003039 | 19.588  |
| gi 115546576 dbj AK234414.1 | grey         | 220.02 | 10.2254 | 0.786739 | 0.114366 | 107.17  |
| gi 115546586 dbj AK234424.1 | midnightblue | 219.05 | 36.5754 | 0.996456 | 0.000253 | 63.068  |
| gi 115546623 dbj AK234461.1 | greenyellow  | 208.59 | 21.6044 | 0.966518 | 0.007318 | 319.186 |
| gi 115546656 dbj AK234494.1 | brown        | 109.47 | 46.722  | 0.731224 | 0.160356 | 18.586  |
| gi 115546695 dbj AK234533.1 | lightcyan    | 296.14 | 26.3889 | 0.992669 | 0.000753 | 124.574 |
| gi 115546696 dbj AK234534.1 | turquoise    | 1542.7 | 1542.27 | 0.995131 | 0.000408 | 54.66   |
| gi 115546712 dbj AK237558.1 | turquoise    | 842.04 | 840.086 | 0.848439 | 0.069197 | 107.328 |
| gi 115546736 dbj AK237582.1 | turquoise    | 1499.4 | 1498.83 | 0.989631 | 0.001265 | 12.326  |
| gi 115546753 dbj AK237599.1 | turquoise    | 353.04 | 333.894 | 0.62135  | 0.263232 | 32.424  |
| gi 115546833 dbj AK237679.1 | grey         | 201.9  | 11.2602 | 0.877889 | 0.050275 | 31.604  |
| gi 115546838 dbj AK237684.1 | red          | 197.19 | 50.5139 | 0.989689 | 0.001255 | 61.634  |
| gi 115546849 dbj AK237695.1 | tan          | 256.7  | 34.7129 | 0.960641 | 0.009318 | 37.326  |
| gi 115546889 dbj AK237735.1 | turquoise    | 1531.4 | 1530.89 | 0.994757 | 0.000455 | 4.652   |
| gi 115546917 dbj AK240563.1 | grey         | 278.95 | 16.1809 | 0.94193  | 0.016651 | 72.038  |
| gi 115546929 dbj AK240575.1 | blue         | 320.72 | 147.609 | 0.983826 | 0.002463 | 58.494  |
| gi 115546934 dbj AK240580.1 | blue         | 343.36 | 145.064 | 0.979382 | 0.003543 | 13.96   |
| gi 115546953 dbj AK240599.1 | turquoise    | 428.54 | 421.029 | 0.698866 | 0.189152 | 36.678  |
| gi 115546964 dbj AK240610.1 | turquoise    | 1427.1 | 1426.26 | 0.978814 | 0.00369  | 21.368  |
| gi 115546978 dbj AK231033.1 | blue         | 326.34 | 113.468 | 0.923579 | 0.025067 | 22.608  |
| gi 115547025 dbj AK231080.1 | turquoise    | 1564.7 | 1564.32 | 0.998487 | 7.06E-05 | 5.716   |
| gi 115547032 dbj AK231087.1 | turquoise    | 1430.1 | 1429.61 | 0.97773  | 0.003976 | 3.168   |
| gi 115547045 dbj AK231100.1 | turquoise    | 1571.2 | 1570.81 | 0.999644 | 8.06E-06 | 2.112   |
| gi 115547065 dbj AK231120.1 | navy         | 286.53 | 30.7539 | 0.968731 | 0.006606 | 19.978  |
| gi 115547083 dbj AK231138.1 | lightgreen   | 75.286 | 16.0447 | 0.950377 | 0.01317  | 11.748  |
| gi 115547094 dbj AK231149.1 | turquoise    | 1456.4 | 1455.68 | 0.982179 | 0.002848 | 26.552  |
| gi 115547099 dbj AK231154.1 | turquoise    | 129.71 | 102.629 | 0.36966  | 0.540285 | 25.346  |
| gi 115547117 dbj AK231172.1 | grey         | 285.2  | 16.3459 | 0.954057 | 0.011739 | 11.844  |
| gi 115547122 dbj AK231177.1 | turquoise    | 1417.8 | 1417.33 | 0.973129 | 0.005266 | 10.27   |
| gi 115547124 dbj AK231179.1 | lightgreen   | 105.49 | 11.7393 | 0.927234 | 0.023304 | 51.124  |
| gi 115547142 dbj AK231197.1 | grey         | 289.13 | 14.087  | 0.863074 | 0.059557 | 619.35  |
| gi 115547162 dbj AK231217.1 | turquoise    | 405.92 | 393.58  | 0.6726   | 0.213492 | 15.708  |
| gi 115547167 dbj AK231222.1 | lightyellow  | 193.44 | 15.8962 | 0.851889 | 0.066884 | 3.356   |
| gi 115547172 dbj AK231227.1 | turquoise    | 1557.6 | 1557.26 | 0.997654 | 0.000136 | 7.99    |
| gi 115547186 dbj AK234559.1 | turquoise    | 956.74 | 953.231 | 0.882774 | 0.047324 | 64.824  |

|                             |              |        |         |          |          |         |
|-----------------------------|--------------|--------|---------|----------|----------|---------|
| gi 115547198 dbj AK234571.1 | lightcyan    | 257.01 | 24.7174 | 0.985468 | 0.002098 | 30.044  |
| gi 115547214 dbj AK234587.1 | brown        | 288.17 | 113.275 | 0.957794 | 0.010342 | 2.758   |
| gi 115547217 dbj AK234590.1 | turquoise    | 1548.2 | 1547.79 | 0.996807 | 0.000216 | 1.214   |
| gi 115547230 dbj AK234603.1 | darkred      | 40.398 | 8.07496 | 0.77574  | 0.123107 | 167.894 |
| gi 115547231 dbj AK234604.1 | black        | 244.87 | 37.8172 | 0.969036 | 0.00651  | 64.232  |
| gi 115547260 dbj AK234633.1 | lightyellow  | 290.17 | 24.19   | 0.981083 | 0.003114 | 52.786  |
| gi 115547290 dbj AK234663.1 | turquoise    | 1470.6 | 1470.08 | 0.981758 | 0.00295  | 3.88    |
| gi 115547309 dbj AK234682.1 | turquoise    | 1548.5 | 1548.03 | 0.996371 | 0.000262 | 9.126   |
| gi 115547340 dbj AK234713.1 | turquoise    | 1545.8 | 1545.34 | 0.995982 | 0.000306 | 93.028  |
| gi 115547352 dbj AK234725.1 | brown        | 213.46 | 94.7723 | 0.921653 | 0.026013 | 58.926  |
| gi 115547361 dbj AK234734.1 | turquoise    | 1555.9 | 1555.45 | 0.997205 | 0.000177 | 99.81   |
| gi 115547364 dbj AK234737.1 | greenyellow  | 53.587 | 1.15866 | 0.379649 | 0.528493 | 16.19   |
| gi 115547369 dbj AK234742.1 | magenta      | 291.11 | 39.395  | 0.968235 | 0.006764 | 26.83   |
| gi 115547381 dbj AK237762.1 | turquoise    | 975.06 | 973.107 | 0.894159 | 0.040672 | 55.238  |
| gi 115547390 dbj AK237771.1 | purple       | 209.13 | 36.348  | 0.999018 | 3.70E-05 | 16.592  |
| gi 115547397 dbj AK237778.1 | pink         | 172.51 | 41.7681 | 0.967926 | 0.006862 | 9.164   |
| gi 115547414 dbj AK237795.1 | turquoise    | 528.35 | 520.987 | 0.749326 | 0.144862 | 81.458  |
| gi 115547436 dbj AK237818.1 | turquoise    | 1343   | 1341.91 | 0.965917 | 0.007514 | 25.238  |
| gi 115547445 dbj AK237827.1 | turquoise    | 985.25 | 984.295 | 0.89881  | 0.038048 | 1002.29 |
| gi 115547488 dbj AK237870.1 | turquoise    | 1546.3 | 1545.83 | 0.997151 | 0.000182 | 81.3    |
| gi 115547522 dbj AK237904.1 | turquoise    | 1513.7 | 1513.13 | 0.992263 | 0.000816 | 68.794  |
| gi 115547541 dbj AK237923.1 | salmon       | 236.16 | 23.5956 | 0.909323 | 0.032328 | 389.436 |
| gi 115547599 dbj AK231257.1 | turquoise    | 1553.6 | 1553.18 | 0.996528 | 0.000245 | 1.748   |
| gi 115547606 dbj AK231264.1 | turquoise    | 1510.9 | 1510.45 | 0.989883 | 0.00122  | 4.126   |
| gi 115547607 dbj AK231265.1 | turquoise    | 131.73 | 104.754 | 0.378832 | 0.529455 | 16.278  |
| gi 115547647 dbj AK231305.1 | turquoise    | 1558   | 1557.62 | 0.997128 | 0.000185 | 7.094   |
| gi 115547679 dbj AK231337.1 | grey60       | 237.56 | 30.5592 | 0.980612 | 0.003231 | 42.232  |
| gi 115547758 dbj AK231416.1 | turquoise    | 1128.4 | 1127.67 | 0.924397 | 0.024669 | 18.944  |
| gi 115547780 dbj AK234756.1 | brown        | 253.82 | 129.058 | 0.996421 | 0.000257 | 9.152   |
| gi 115547803 dbj AK234779.1 | turquoise    | 1258.8 | 1257.47 | 0.950404 | 0.01316  | 108.706 |
| gi 115547849 dbj AK234825.1 | blue         | 343.68 | 152.123 | 0.990806 | 0.001057 | 38.476  |
| gi 115547856 dbj AK234832.1 | turquoise    | 1509   | 1508.44 | 0.99167  | 0.000911 | 77.15   |
| gi 115547886 dbj AK234862.1 | turquoise    | 486.26 | 480.621 | 0.721951 | 0.168468 | 16.41   |
| gi 115547932 dbj AK234909.1 | navy         | 208.01 | 29.8224 | 0.966997 | 0.007161 | 70.86   |
| gi 115547946 dbj AK234923.1 | turquoise    | 1181.4 | 1179.92 | 0.930461 | 0.021782 | 18.578  |
| gi 115547950 dbj AK234927.1 | turquoise    | 1513.8 | 1513.38 | 0.989032 | 0.001377 | 58.586  |
| gi 115547955 dbj AK234932.1 | lightyellow  | 207.38 | 16.6614 | 0.875721 | 0.051602 | 33.722  |
| gi 115547984 dbj AK237968.1 | turquoise    | 1433.6 | 1433.22 | 0.977908 | 0.003929 | 3.642   |
| gi 115547985 dbj AK237969.1 | darkgreen    | 257.93 | 22.8352 | 0.983882 | 0.002451 | 10.936  |
| gi 115548000 dbj AK237984.1 | yellow       | 301.99 | 70.0446 | 0.934897 | 0.019745 | 29.556  |
| gi 115548002 dbj AK237986.1 | black        | 255.59 | 35.6223 | 0.961695 | 0.008948 | 275.056 |
| gi 115548023 dbj AK238007.1 | turquoise    | 1434.5 | 1434.13 | 0.976646 | 0.004269 | 6.08    |
| gi 115548072 dbj AK238056.1 | midnightblue | 240.16 | 37.1165 | 0.999506 | 1.32E-05 | 19.294  |
| gi 115548093 dbj AK238077.1 | turquoise    | 749.25 | 744.247 | 0.826    | 0.084818 | 61.466  |
| gi 115548136 dbj AK238120.1 | royalblue    | 164.25 | 23.9797 | 0.974254 | 0.00494  | 3.05    |
| gi 115548140 dbj AK238124.1 | turquoise    | 1501   | 1500.35 | 0.989918 | 0.001213 | 4.794   |
| gi 115548164 dbj AK238148.1 | purple       | 60.158 | 2.4644  | 0.28382  | 0.643541 | 0.864   |
| gi 115548176 dbj AK234948.1 | turquoise    | 374.89 | 369.663 | 0.684342 | 0.202508 | 249.268 |



|                             |              |        |         |          |          |         |
|-----------------------------|--------------|--------|---------|----------|----------|---------|
| gi 115548217 dbj AK231527.1 | turquoise    | 1551.2 | 1550.75 | 0.99725  | 0.000173 | 4.996   |
| gi 115548219 dbj AK231529.1 | turquoise    | 879.1  | 876.893 | 0.856225 | 0.064013 | 48.836  |
| gi 115548230 dbj AK231444.1 | turquoise    | 1530.5 | 1530.15 | 0.993112 | 0.000685 | 12.142  |
| gi 115548316 dbj AK234973.1 | turquoise    | 1421.4 | 1420.74 | 0.979466 | 0.003521 | 28.906  |
| gi 115548319 dbj AK231543.1 | darkred      | 93.571 | 13.3749 | 0.973057 | 0.005287 | 63.934  |
| gi 115548328 dbj AK231701.1 | turquoise    | 156.49 | 150.73  | 0.517481 | 0.37184  | 57.002  |
| gi 115548360 dbj AK231733.1 | yellow       | 298.05 | 60.8998 | 0.889147 | 0.043561 | 53.734  |
| gi 115548383 dbj AK235000.1 | turquoise    | 1321.8 | 1320.95 | 0.963045 | 0.008481 | 39.186  |
| gi 115548388 dbj AK235005.1 | brown        | 102.57 | 40.9317 | 0.695004 | 0.192679 | 99.57   |
| gi 115548389 dbj AK235006.1 | turquoise    | 1351.8 | 1350.79 | 0.965632 | 0.007609 | 25.418  |
| gi 115548394 dbj AK235011.1 | turquoise    | 390.86 | 383.076 | 0.661312 | 0.2242   | 80.85   |
| gi 115548409 dbj AK235026.1 | turquoise    | 1391.5 | 1390.93 | 0.971322 | 0.005805 | 42.016  |
| gi 115548424 dbj AK235041.1 | turquoise    | 590.25 | 585.258 | 0.76651  | 0.130589 | 36.29   |
| gi 115548435 dbj AK235052.1 | turquoise    | 1559.8 | 1559.37 | 0.998313 | 8.32E-05 | 1.884   |
| gi 115548441 dbj AK235058.1 | black        | 279.13 | 41.4806 | 0.977615 | 0.004007 | 39.832  |
| gi 115548447 dbj AK235064.1 | green        | 126.87 | 36.323  | 0.888017 | 0.044221 | 5.914   |
| gi 115548454 dbj AK235071.1 | yellow       | 232.05 | 68.5335 | 0.938284 | 0.018233 | 22.858  |
| gi 115548467 dbj AK235084.1 | turquoise    | 1091.5 | 1089.29 | 0.916459 | 0.02862  | 218.056 |
| gi 115548500 dbj AK235117.1 | turquoise    | 1077.8 | 1075.9  | 0.911849 | 0.030999 | 86.268  |
| gi 115548514 dbj AK235131.1 | turquoise    | 787.73 | 783.811 | 0.842126 | 0.073491 | 73.72   |
| gi 115548519 dbj AK235136.1 | tan          | 301.23 | 37.2295 | 0.976173 | 0.004399 | 16.876  |
| gi 115548520 dbj AK235137.1 | lightgreen   | 105.57 | 6.20908 | 0.201321 | 0.745412 | 231.096 |
| gi 115548526 dbj AK235143.1 | turquoise    | 1336.4 | 1335.3  | 0.962114 | 0.008802 | 70.79   |
| gi 115548554 dbj AK235171.1 | blue         | 221.8  | 100.956 | 0.897877 | 0.03857  | 43.53   |
| gi 115548564 dbj AK231548.1 | turquoise    | 1257.6 | 1256.16 | 0.949101 | 0.013679 | 64.736  |
| gi 115548572 dbj AK231556.1 | brown        | 286.62 | 112.08  | 0.95414  | 0.011708 | 67.906  |
| gi 115548574 dbj AK231558.1 | green        | 111.64 | 24.5887 | 0.79905  | 0.104815 | 201.602 |
| gi 115548575 dbj AK231559.1 | turquoise    | 1516.1 | 1515.72 | 0.990619 | 0.001089 | 32.482  |
| gi 115548591 dbj AK231575.1 | turquoise    | 975.75 | 973.036 | 0.892933 | 0.041373 | 23.474  |
| gi 115548658 dbj AK231642.1 | turquoise    | 1285.2 | 1283.87 | 0.955089 | 0.011348 | 70.956  |
| gi 115548691 dbj AK231676.1 | turquoise    | 1095.3 | 1093.53 | 0.918465 | 0.027604 | 4.392   |
| gi 115548698 dbj AK231683.1 | lightyellow  | 208.53 | 17.0779 | 0.88193  | 0.04783  | 64.764  |
| gi 115548717 dbj AK231783.1 | midnightblue | 209.63 | 32.2486 | 0.970883 | 0.005938 | 68.094  |
| gi 115548727 dbj AK231793.1 | turquoise    | 404.55 | 399.194 | 0.687262 | 0.199803 | 21.148  |
| gi 115548797 dbj AK231755.1 | yellow       | 128.23 | 59.5422 | 0.901097 | 0.036779 | 96.14   |
| gi 115548801 dbj AK231759.1 | darkred      | 77.295 | 11.776  | 0.905348 | 0.034456 | 70.752  |
| gi 115548831 dbj AK231946.1 | turquoise    | 1216.9 | 1215.38 | 0.943348 | 0.016049 | 148.494 |
| gi 115548849 dbj AK235252.1 | brown        | 313.54 | 93.8273 | 0.906068 | 0.034068 | 14.722  |
| gi 115548869 dbj AK235272.1 | brown        | 164.45 | 89.4717 | 0.902854 | 0.035813 | 8.468   |
| gi 115548882 dbj AK235285.1 | turquoise    | 205.42 | 194.628 | 0.545857 | 0.341242 | 175.238 |
| gi 115548919 dbj AK235322.1 | turquoise    | 1214.1 | 1212.79 | 0.936753 | 0.018912 | 54.846  |
| gi 115548922 dbj AK235325.1 | turquoise    | 1233.2 | 1231.94 | 0.944959 | 0.015373 | 502.7   |
| gi 115548932 dbj AK235335.1 | turquoise    | 770.35 | 767.935 | 0.831051 | 0.081216 | 24.508  |
| gi 115548933 dbj AK235336.1 | turquoise    | 1366.4 | 1365.55 | 0.967426 | 0.007023 | 22.282  |
| gi 115548942 dbj AK235345.1 | yellow       | 180.45 | 65.4399 | 0.924105 | 0.024811 | 51.586  |
| gi 115548955 dbj AK235358.1 | turquoise    | 1511.5 | 1511.12 | 0.989902 | 0.001216 | 87.488  |
| gi 115548956 dbj AK235359.1 | turquoise    | 1447.4 | 1446.7  | 0.981867 | 0.002923 | 101.738 |
| gi 115548969 dbj AK235372.1 | turquoise    | 1312.5 | 1311.67 | 0.961628 | 0.008971 | 9.836   |

|                             |               |        |         |          |          |         |
|-----------------------------|---------------|--------|---------|----------|----------|---------|
| gi 115548982 dbj AK238171.1 | turquoise     | 1506.4 | 1505.86 | 0.989971 | 0.001204 | 21.126  |
| gi 115549078 dbj AK238267.1 | turquoise     | 975.15 | 971.952 | 0.888238 | 0.044092 | 25.586  |
| gi 115549177 dbj AK231853.1 | pink          | 124.83 | 30.5504 | 0.894972 | 0.04021  | 32.994  |
| gi 115549179 dbj AK231855.1 | turquoise     | 1279   | 1277.65 | 0.952565 | 0.012313 | 48.664  |
| gi 115549210 dbj AK231886.1 | grey          | 62.247 | 9.18708 | 0.14602  | 0.814745 | 12.056  |
| gi 115549219 dbj AK231895.1 | turquoise     | 235.26 | 211.673 | 0.519946 | 0.369157 | 30.526  |
| gi 115549239 dbj AK231915.1 | turquoise     | 1133.3 | 1131.79 | 0.919247 | 0.027211 | 60.006  |
| gi 115549258 dbj AK235178.1 | turquoise     | 1451.1 | 1450.44 | 0.98034  | 0.003299 | 65.436  |
| gi 115549275 dbj AK235196.1 | turquoise     | 1546.2 | 1545.68 | 0.997191 | 0.000179 | 64.394  |
| gi 115549299 dbj AK235220.1 | purple        | 191.6  | 34.9445 | 0.987906 | 0.001594 | 64.916  |
| gi 115549306 dbj AK235227.1 | turquoise     | 1159.4 | 1157.91 | 0.928739 | 0.02259  | 5.128   |
| gi 115549313 dbj AK235234.1 | green         | 136.33 | 35.457  | 0.9002   | 0.037275 | 92.668  |
| gi 115549321 dbj AK232099.1 | turquoise     | 1565.1 | 1564.75 | 0.998624 | 6.12E-05 | 25.3    |
| gi 115549331 dbj AK232109.1 | grey          | 293.13 | 15.0593 | 0.926737 | 0.023541 | 177.638 |
| gi 115549338 dbj AK232116.1 | green         | 88.192 | 22.2939 | 0.788688 | 0.112837 | 49.424  |
| gi 115549349 dbj AK232127.1 | midnightblue  | 223.54 | 32.3946 | 0.971468 | 0.005761 | 24.136  |
| gi 115549359 dbj AK235381.1 | turquoise     | 1430.7 | 1430.24 | 0.976231 | 0.004383 | 10.81   |
| gi 115549368 dbj AK235390.1 | grey60        | 288.77 | 24.6279 | 0.932347 | 0.020908 | 17.108  |
| gi 115549388 dbj AK235410.1 | turquoise     | 566.42 | 560.915 | 0.766138 | 0.130894 | 12.432  |
| gi 115549396 dbj AK235418.1 | turquoise     | 1246.4 | 1245.02 | 0.944938 | 0.015381 | 17.678  |
| gi 115549402 dbj AK235424.1 | turquoise     | 1512.8 | 1512.3  | 0.990924 | 0.001037 | 1.082   |
| gi 115549412 dbj AK235434.1 | turquoise     | 338.27 | 319.988 | 0.631961 | 0.252703 | 58.656  |
| gi 115549416 dbj AK235438.1 | turquoise     | 1564.8 | 1564.4  | 0.998907 | 4.34E-05 | 8.216   |
| gi 115549428 dbj AK235450.1 | turquoise     | 1435.3 | 1434.68 | 0.980227 | 0.003328 | 247.09  |
| gi 115549440 dbj AK235462.1 | brown         | 342.85 | 79.2676 | 0.857262 | 0.063332 | 167.73  |
| gi 115549454 dbj AK235476.1 | turquoise     | 125.67 | 99.9939 | 0.39005  | 0.51627  | 19.072  |
| gi 115549455 dbj AK235477.1 | turquoise     | 1268.2 | 1267.69 | 0.951723 | 0.012641 | 106.994 |
| gi 115549486 dbj AK235508.1 | turquoise     | 1381   | 1380.04 | 0.970957 | 0.005916 | 76.292  |
| gi 115549499 dbj AK235521.1 | turquoise     | 966.08 | 963.639 | 0.888539 | 0.043916 | 16.928  |
| gi 115549511 dbj AK235533.1 | grey          | 91.043 | 6.35105 | 0.135694 | 0.82776  | 41.04   |
| gi 115549536 dbj AK235558.1 | turquoise     | 1373.5 | 1372.67 | 0.968466 | 0.00669  | 8.904   |
| gi 115549537 dbj AK235559.1 | turquoise     | 1535.8 | 1535.33 | 0.99543  | 0.000371 | 56.876  |
| gi 115549562 dbj AK238370.1 | turquoise     | 1222.7 | 1221.66 | 0.935882 | 0.019301 | 6.464   |
| gi 115549571 dbj AK238379.1 | greenyellow   | 65.499 | 6.84371 | -0.48379 | 0.408975 | 16.148  |
| gi 115549608 dbj AK238416.1 | lightgreen    | 50.741 | 15.5516 | 0.947305 | 0.014405 | 59.674  |
| gi 115549613 dbj AK238421.1 | darkturquoise | 149.04 | 10.378  | 0.866698 | 0.057241 | 50.148  |
| gi 115549624 dbj AK238432.1 | turquoise     | 1556.2 | 1555.79 | 0.996503 | 0.000248 | 3.48    |
| gi 115549680 dbj AK231959.1 | yellow        | 169.13 | 71.7982 | 0.956349 | 0.010876 | 216.416 |
| gi 115549689 dbj AK231968.1 | pink          | 246.21 | 46.6176 | 0.991692 | 0.000908 | 44.57   |
| gi 115549693 dbj AK231972.1 | turquoise     | 332.57 | 323.583 | 0.623937 | 0.260654 | 39.092  |
| gi 115549744 dbj AK232023.1 | pink          | 264.14 | 41.8561 | 0.963144 | 0.008447 | 89.204  |
| gi 115549787 dbj AK232067.1 | red           | 244.37 | 51.5768 | 0.992656 | 0.000755 | 66.752  |
| gi 115549792 dbj AK232072.1 | turquoise     | 669.29 | 666.358 | 0.794279 | 0.108486 | 2.356   |
| gi 115549831 dbj AK238491.1 | blue          | 243.55 | 117.387 | 0.931952 | 0.02109  | 5.426   |
| gi 115549856 dbj AK238516.1 | lightcyan     | 269.8  | 22.7881 | 0.941017 | 0.017043 | 53.16   |
| gi 115549900 dbj AK232134.1 | yellow        | 224.74 | 83.7276 | 0.994005 | 0.000557 | 56.362  |
| gi 115549902 dbj AK232136.1 | grey          | 281.05 | 16.8655 | 0.964302 | 0.008053 | 19.806  |
| gi 115549949 dbj AK232184.1 | lightcyan     | 288.89 | 27.3479 | 0.994937 | 0.000432 | 129.124 |

|                             |             |        |         |          |          |         |
|-----------------------------|-------------|--------|---------|----------|----------|---------|
| gi 115549970 dbj AK232205.1 | navy        | 209.54 | 27.8455 | 0.947334 | 0.014393 | 16.65   |
| gi 115549976 dbj AK232211.1 | turquoise   | 1504.4 | 1503.99 | 0.98794  | 0.001587 | 10.23   |
| gi 115550002 dbj AK232237.1 | grey        | 30.781 | 1.74702 | 0.225579 | 0.715239 | 65.304  |
| gi 115550007 dbj AK232242.1 | brown       | 186.39 | 99.4268 | 0.931274 | 0.021404 | 99.774  |
| gi 115550039 dbj AK232274.1 | turquoise   | 1018   | 1016.62 | 0.893483 | 0.041058 | 42.668  |
| gi 115550042 dbj AK232277.1 | yellow      | 255.02 | 74.6595 | 0.959014 | 0.009899 | 173.994 |
| gi 115550054 dbj AK232289.1 | greenyellow | 218.83 | 21.4019 | 0.983842 | 0.00246  | 12.222  |
| gi 115550060 dbj AK232295.1 | brown       | 216    | 117.826 | 0.981231 | 0.003078 | 58.822  |
| gi 115550075 dbj AK232310.1 | turquoise   | 100.27 | 52.2389 | 0.199689 | 0.747449 | 0.284   |
| gi 115550091 dbj AK232326.1 | turquoise   | 1555.8 | 1555.43 | 0.99685  | 0.000212 | 42.678  |
| gi 115550094 dbj AK232329.1 | turquoise   | 1458.4 | 1457.83 | 0.98377  | 0.002476 | 30.666  |
| gi 115550108 dbj AK235587.1 | lightgreen  | 56.501 | 16.7457 | 0.988942 | 0.001394 | 1.326   |
| gi 115550124 dbj AK235603.1 | grey60      | 274.19 | 31.7816 | 0.988608 | 0.001457 | 158.174 |
| gi 115550125 dbj AK235604.1 | lightcyan   | 202.69 | 6.4366  | 0.261776 | 0.670543 | 33.82   |
| gi 115550130 dbj AK235609.1 | grey        | 254.09 | 14.2704 | 0.910822 | 0.031537 | 15.538  |
| gi 115550133 dbj AK235612.1 | turquoise   | 645.35 | 641.889 | 0.801933 | 0.102615 | 561.656 |
| gi 115550154 dbj AK235633.1 | turquoise   | 788.98 | 785.428 | 0.844114 | 0.072131 | 7.53    |
| gi 115550155 dbj AK235634.1 | turquoise   | 1322.5 | 1321.4  | 0.958241 | 0.010179 | 54.46   |
| gi 115550159 dbj AK235638.1 | green       | 187.89 | 35.443  | 0.85963  | 0.061785 | 7.542   |
| gi 115550165 dbj AK235644.1 | turquoise   | 309.08 | 297.282 | 0.628022 | 0.256598 | 99.152  |
| gi 115550169 dbj AK235648.1 | turquoise   | 1549.3 | 1548.88 | 0.995746 | 0.000333 | 35.246  |
| gi 115550178 dbj AK235657.1 | turquoise   | 1371.4 | 1370.8  | 0.964518 | 0.00798  | 25.382  |
| gi 115550183 dbj AK235662.1 | blue        | 319.81 | 146.685 | 0.981949 | 0.002903 | 18.624  |
| gi 115550185 dbj AK235664.1 | salmon      | 68.602 | 11.9245 | 0.773955 | 0.124544 | 22.234  |
| gi 115550191 dbj AK235670.1 | turquoise   | 1149.8 | 1148.65 | 0.923725 | 0.024996 | 28.038  |
| gi 115550230 dbj AK235709.1 | turquoise   | 1335.6 | 1334.63 | 0.962339 | 0.008724 | 35.576  |
| gi 115550272 dbj AK235751.1 | magenta     | 342.46 | 43.5327 | 0.988003 | 0.001575 | 67.452  |
| gi 115550292 dbj AK235771.1 | yellow      | 299.24 | 69.3137 | 0.933544 | 0.020359 | 101.19  |
| gi 115550330 dbj AK238595.1 | green       | 167.73 | 34.5702 | 0.893264 | 0.041183 | 11.114  |
| gi 115550332 dbj AK238597.1 | turquoise   | 378.19 | 367.248 | 0.667227 | 0.21857  | 155.276 |
| gi 115550345 dbj AK238610.1 | turquoise   | 1550.1 | 1549.64 | 0.997245 | 0.000174 | 5.454   |
| gi 115550346 dbj AK238611.1 | turquoise   | 1491   | 1490.63 | 0.985281 | 0.002139 | 11.066  |
| gi 115550351 dbj AK238616.1 | turquoise   | 1469.8 | 1469.13 | 0.986119 | 0.001959 | 27.102  |
| gi 115550354 dbj AK238619.1 | black       | 188.77 | 27.0131 | 0.885831 | 0.045507 | 101.478 |
| gi 115550357 dbj AK238622.1 | turquoise   | 1565.7 | 1565.23 | 0.999469 | 1.47E-05 | 50.96   |
| gi 115550390 dbj AK238655.1 | turquoise   | 453.1  | 448.412 | 0.726658 | 0.164336 | 34.614  |
| gi 115550392 dbj AK238657.1 | blue        | 321.14 | 151.126 | 0.989365 | 0.001314 | 28.948  |
| gi 115550393 dbj AK238658.1 | brown       | 193.57 | 110.418 | 0.959515 | 0.009719 | 3.688   |
| gi 115550394 dbj AK238659.1 | darkred     | 78.36  | 8.64465 | 0.823342 | 0.086732 | 39.142  |
| gi 115550416 dbj AK238681.1 | turquoise   | 527.78 | 523.659 | 0.749093 | 0.145058 | 42.74   |
| gi 115550429 dbj AK238694.1 | yellow      | 299.9  | 48.2501 | 0.814473 | 0.093212 | 28.96   |
| gi 115550430 dbj AK238695.1 | turquoise   | 1502.7 | 1502.14 | 0.989274 | 0.001331 | 7.046   |
| gi 115550441 dbj AK238706.1 | turquoise   | 794.6  | 792.221 | 0.834222 | 0.07898  | 61.432  |
| gi 115550476 dbj AK238741.1 | turquoise   | 1556.6 | 1556.22 | 0.996912 | 0.000206 | 13.592  |
| gi 115550482 dbj AK238747.1 | turquoise   | 1374.3 | 1373.81 | 0.964538 | 0.007974 | 4.23    |
| gi 115550487 dbj AK238752.1 | turquoise   | 1467.7 | 1467.02 | 0.986013 | 0.001981 | 35.662  |
| gi 115550524 dbj AK232354.1 | turquoise   | 1295.9 | 1294.74 | 0.954898 | 0.01142  | 7.282   |
| gi 115550537 dbj AK232367.1 | yellow      | 241.82 | 67.8817 | 0.920677 | 0.026497 | 27.038  |

|                             |               |        |         |          |          |         |
|-----------------------------|---------------|--------|---------|----------|----------|---------|
| gi 115550567 dbj AK232397.1 | yellow        | 109.49 | 38.5244 | 0.784915 | 0.115802 | 14.39   |
| gi 115550607 dbj AK232437.1 | greenyellow   | 95.528 | 6.98401 | -0.41826 | 0.483419 | 33.66   |
| gi 115550629 dbj AK232459.1 | tan           | 305.38 | 40.1307 | 0.993252 | 0.000665 | 61.57   |
| gi 115550647 dbj AK232477.1 | turquoise     | 1521.2 | 1520.82 | 0.991153 | 0.000998 | 0.982   |
| gi 115550656 dbj AK232486.1 | turquoise     | 173.91 | 155.521 | 0.454034 | 0.442432 | 16.412  |
| gi 115550671 dbj AK232501.1 | turquoise     | 174.97 | 140.026 | 0.406753 | 0.496764 | 36.928  |
| gi 115550708 dbj AK235782.1 | blue          | 349.71 | 140.85  | 0.973241 | 0.005234 | 85.134  |
| gi 115550714 dbj AK235788.1 | turquoise     | 321.44 | 317.551 | 0.646491 | 0.238476 | 3.758   |
| gi 115550750 dbj AK235824.1 | brown         | 257.56 | 84.7007 | 0.88855  | 0.043909 | 13.006  |
| gi 115550755 dbj AK235829.1 | turquoise     | 1228.7 | 1227.73 | 0.946843 | 0.014594 | 71.226  |
| gi 115550758 dbj AK235833.1 | turquoise     | 407.89 | 400.224 | 0.691132 | 0.196232 | 56.152  |
| gi 115550785 dbj AK235860.1 | turquoise     | 329.04 | 318.348 | 0.643764 | 0.241129 | 63.136  |
| gi 115550795 dbj AK235870.1 | darkred       | 86.091 | 10.3403 | 0.86365  | 0.059187 | 18.114  |
| gi 115550804 dbj AK235879.1 | turquoise     | 1457.4 | 1456.74 | 0.984591 | 0.002291 | 11.168  |
| gi 115550806 dbj AK235881.1 | turquoise     | 1115.1 | 1114.43 | 0.925059 | 0.024348 | 56.246  |
| gi 115550817 dbj AK235892.1 | turquoise     | 1107.6 | 1105.8  | 0.923259 | 0.025224 | 45.186  |
| gi 115550848 dbj AK235923.1 | midnightblue  | 244.29 | 36.8188 | 0.997754 | 0.000128 | 57.084  |
| gi 115550874 dbj AK235949.1 | turquoise     | 1359.3 | 1358.45 | 0.968024 | 0.006831 | 57.056  |
| gi 115550882 dbj AK235957.1 | turquoise     | 1443.4 | 1442.95 | 0.979262 | 0.003574 | 4.542   |
| gi 115550889 dbj AK235964.1 | turquoise     | 441.11 | 433.66  | 0.70615  | 0.182552 | 43.858  |
| gi 115550896 dbj AK235971.1 | turquoise     | 1526   | 1525.5  | 0.993469 | 0.000633 | 90.356  |
| gi 115550899 dbj AK238760.1 | turquoise     | 1000.7 | 997.495 | 0.892947 | 0.041365 | 32.854  |
| gi 115550900 dbj AK238761.1 | turquoise     | 1536.3 | 1535.9  | 0.99353  | 0.000624 | 23.184  |
| gi 115550918 dbj AK238779.1 | turquoise     | 261.3  | 222.642 | 0.500987 | 0.389914 | 60.228  |
| gi 115550923 dbj AK238784.1 | blue          | 236.64 | 103.407 | 0.903894 | 0.035245 | 12.992  |
| gi 115550943 dbj AK238804.1 | turquoise     | 1557   | 1556.56 | 0.998017 | 0.000106 | 39.08   |
| gi 115550946 dbj AK238807.1 | turquoise     | 292.95 | 258.335 | 0.546593 | 0.340458 | 95.998  |
| gi 115550971 dbj AK238832.1 | turquoise     | 131.14 | 108.535 | 0.394668 | 0.510861 | 41.966  |
| gi 115550975 dbj AK238836.1 | tan           | 329.71 | 35.4261 | 0.963759 | 0.008237 | 206.558 |
| gi 115550976 dbj AK238837.1 | turquoise     | 1450.6 | 1450.07 | 0.982153 | 0.002854 | 77.072  |
| gi 115550982 dbj AK238843.1 | darkturquoise | 190.69 | 7.24497 | 0.775449 | 0.123342 | 59.4    |
| gi 115550999 dbj AK238860.1 | turquoise     | 119.37 | 44.7817 | 0.087672 | 0.888515 | 58.664  |
| gi 115551001 dbj AK238862.1 | turquoise     | 1473.4 | 1472.93 | 0.983105 | 0.002629 | 307.042 |
| gi 115551027 dbj AK238888.1 | turquoise     | 163.18 | 111.935 | 0.347036 | 0.567177 | 20.862  |
| gi 115551063 dbj AK238924.1 | turquoise     | 1190.3 | 1189.43 | 0.928401 | 0.022749 | 13.232  |
| gi 115551074 dbj AK238935.1 | black         | 141.49 | 19.8644 | 0.816048 | 0.092051 | 14.044  |
| gi 115551088 dbj AK238949.1 | lightgreen    | 110.38 | 8.61384 | 0.778171 | 0.121158 | 22.218  |
| gi 115551105 dbj AK232538.1 | turquoise     | 407.19 | 394.903 | 0.674764 | 0.211455 | 21.212  |
| gi 115551122 dbj AK232555.1 | lightcyan     | 294.29 | 25.852  | 0.993368 | 0.000648 | 24.636  |
| gi 115551173 dbj AK232606.1 | turquoise     | 1534.5 | 1534.03 | 0.99454  | 0.000484 | 22.312  |
| gi 115551176 dbj AK232609.1 | yellow        | 277.25 | 65.3768 | 0.904668 | 0.034824 | 55.63   |
| gi 115551177 dbj AK232610.1 | greenyellow   | 54.495 | 6.19997 | -0.18713 | 0.763139 | 25.252  |
| gi 115551181 dbj AK232614.1 | yellow        | 186.97 | 57.5565 | 0.901396 | 0.036614 | 94.642  |
| gi 115551189 dbj AK232622.1 | turquoise     | 779.81 | 775.459 | 0.838161 | 0.07623  | 18.582  |
| gi 115551213 dbj AK232646.1 | yellow        | 116.3  | 52.3411 | 0.872425 | 0.05364  | 8.634   |
| gi 115551216 dbj AK232649.1 | turquoise     | 1105.3 | 1104.07 | 0.918982 | 0.027343 | 35.31   |
| gi 115551270 dbj AK232704.1 | grey60        | 230.8  | 30.6585 | 0.980687 | 0.003213 | 203.382 |
| gi 115551308 dbj AK235986.1 | yellow        | 119.06 | 47.404  | 0.846699 | 0.070373 | 37.834  |

|                             |               |        |         |          |          |         |
|-----------------------------|---------------|--------|---------|----------|----------|---------|
| gi 115551350 dbj AK236028.1 | magenta       | 294.31 | 39.73   | 0.96878  | 0.006591 | 65.746  |
| gi 115551358 dbj AK236036.1 | turquoise     | 144.65 | 96.4195 | 0.348655 | 0.565244 | 30.32   |
| gi 115551364 dbj AK236042.1 | turquoise     | 1519.9 | 1519.5  | 0.990114 | 0.001178 | 8.302   |
| gi 115551374 dbj AK236052.1 | turquoise     | 1250   | 1249.26 | 0.950163 | 0.013255 | 75.36   |
| gi 115551399 dbj AK236077.1 | darkturquoise | 155.07 | 17.0193 | 0.979997 | 0.003386 | 23.528  |
| gi 115551408 dbj AK236086.1 | grey          | 315.48 | 17.2484 | 0.967176 | 0.007103 | 79.31   |
| gi 115551411 dbj AK236089.1 | turquoise     | 1381.3 | 1380.65 | 0.968344 | 0.006729 | 3.492   |
| gi 115551432 dbj AK236110.1 | turquoise     | 1481.5 | 1480.88 | 0.987093 | 0.001757 | 40.794  |
| gi 115551465 dbj AK236143.1 | turquoise     | 1559.9 | 1559.49 | 0.99757  | 0.000144 | 13.58   |
| gi 115551480 dbj AK236158.1 | turquoise     | 1560.9 | 1560.41 | 0.998878 | 4.51E-05 | 9.568   |
| gi 115551482 dbj AK236160.1 | turquoise     | 1365.4 | 1364.54 | 0.969466 | 0.006375 | 51.184  |
| gi 115551497 dbj AK238961.1 | turquoise     | 1355   | 1353.91 | 0.967626 | 0.006958 | 198.012 |
| gi 115551503 dbj AK238967.1 | turquoise     | 1550.4 | 1550    | 0.996239 | 0.000277 | 7.508   |
| gi 115551518 dbj AK238982.1 | magenta       | 271.27 | 32.2286 | 0.924233 | 0.024749 | 21.03   |
| gi 115551521 dbj AK238985.1 | turquoise     | 968.6  | 968.043 | 0.892648 | 0.041537 | 56.978  |
| gi 115551534 dbj AK238998.1 | green         | 80.002 | 16.814  | 0.678328 | 0.208114 | 44.472  |
| gi 115551591 dbj AK239055.1 | turquoise     | 1470.3 | 1469.65 | 0.985299 | 0.002135 | 21.432  |
| gi 115551607 dbj AK239071.1 | turquoise     | 896.58 | 892.185 | 0.865679 | 0.05789  | 39.92   |
| gi 115551630 dbj AK239094.1 | turquoise     | 1446.4 | 1445.66 | 0.981041 | 0.003125 | 47.83   |
| gi 115551631 dbj AK239095.1 | turquoise     | 239.9  | 220.293 | 0.560989 | 0.325196 | 13.562  |
| gi 115551642 dbj AK239106.1 | darkgreen     | 237.59 | 22.2685 | 0.975125 | 0.004692 | 80.378  |
| gi 115551644 dbj AK239108.1 | turquoise     | 1547.4 | 1546.95 | 0.99694  | 0.000203 | 4.192   |
| gi 115551673 dbj AK239137.1 | turquoise     | 1204.9 | 1203.49 | 0.937777 | 0.018457 | 15.03   |
| gi 115551776 dbj AK236182.1 | navy          | 263.12 | 34.0915 | 0.996415 | 0.000258 | 98.218  |
| gi 115551787 dbj AK236193.1 | turquoise     | 375.35 | 356.98  | 0.637615 | 0.247141 | 23.482  |
| gi 115551791 dbj AK236197.1 | turquoise     | 1405.9 | 1405.35 | 0.970674 | 0.006002 | 22.576  |
| gi 115551807 dbj AK236213.1 | turquoise     | 1537.9 | 1537.55 | 0.99442  | 0.0005   | 2.924   |
| gi 115551834 dbj AK236241.1 | turquoise     | 220.43 | 172.317 | 0.447649 | 0.449689 | 46.19   |
| gi 115551842 dbj AK236249.1 | turquoise     | 1398.6 | 1397.65 | 0.974736 | 0.004802 | 75.79   |
| gi 115551880 dbj AK236287.1 | magenta       | 335.82 | 43.454  | 0.98862  | 0.001455 | 20.302  |
| gi 115551885 dbj AK236292.1 | turquoise     | 1557   | 1556.57 | 0.997451 | 0.000154 | 5.804   |
| gi 115551894 dbj AK236301.1 | brown         | 292.76 | 118.414 | 0.970182 | 0.006153 | 19.21   |
| gi 115551900 dbj AK236307.1 | grey          | 62.515 | 8.78442 | -0.08947 | 0.886237 | 0.584   |
| gi 115551903 dbj AK236310.1 | yellow        | 129.6  | 54.4743 | 0.875796 | 0.051555 | 68.594  |
| gi 115551917 dbj AK236324.1 | royalblue     | 239.19 | 24.8476 | 0.982631 | 0.002741 | 74.214  |
| gi 115551923 dbj AK236330.1 | greenyellow   | 209.81 | 22.7331 | 0.980031 | 0.003377 | 5.752   |
| gi 115551932 dbj AK236339.1 | turquoise     | 973.85 | 970.671 | 0.888022 | 0.044218 | 91.254  |
| gi 115551938 dbj AK236345.1 | turquoise     | 472.8  | 466.879 | 0.706236 | 0.182474 | 45.638  |
| gi 115551966 dbj AK239159.1 | turquoise     | 1470.7 | 1470.13 | 0.985191 | 0.002159 | 14.296  |
| gi 115551974 dbj AK239167.1 | blue          | 338.09 | 150.795 | 0.988368 | 0.001503 | 7.646   |
| gi 115551993 dbj AK239186.1 | turquoise     | 606.12 | 595.964 | 0.767192 | 0.130032 | 113.838 |
| gi 115552005 dbj AK239198.1 | turquoise     | 1031.8 | 1028.83 | 0.900269 | 0.037237 | 14.132  |
| gi 115552041 dbj AK239234.1 | blue          | 224.77 | 106.853 | 0.910933 | 0.031479 | 14.562  |
| gi 115552057 dbj AK239250.1 | turquoise     | 651.54 | 645.86  | 0.799641 | 0.104362 | 33.224  |
| gi 115552064 dbj AK239257.1 | turquoise     | 1299.8 | 1299.11 | 0.950356 | 0.013179 | 64.83   |
| gi 115552080 dbj AK239273.1 | turquoise     | 1398   | 1397.51 | 0.972731 | 0.005384 | 37.442  |
| gi 115552084 dbj AK239277.1 | turquoise     | 1110.4 | 1108.77 | 0.918885 | 0.027392 | 9.066   |
| gi 115552089 dbj AK239282.1 | turquoise     | 1163.9 | 1162.92 | 0.922565 | 0.025564 | 49.208  |

|                             |              |        |         |          |          |          |
|-----------------------------|--------------|--------|---------|----------|----------|----------|
| gi 115552097 dbj AK239290.1 | turquoise    | 1443.1 | 1442.32 | 0.981748 | 0.002952 | 126.934  |
| gi 115552101 dbj AK239294.1 | turquoise    | 1007.8 | 1005.53 | 0.900498 | 0.03711  | 52.868   |
| gi 115552127 dbj AK239320.1 | turquoise    | 1553.6 | 1553.18 | 0.996528 | 0.000245 | 2.032    |
| gi 115552144 dbj AK239337.1 | turquoise    | 1319.2 | 1318.16 | 0.959206 | 0.00983  | 10.818   |
| gi 115552159 dbj AK239352.1 | turquoise    | 1442.9 | 1442.21 | 0.981832 | 0.002932 | 24.794   |
| gi 115552176 dbj AK230485.1 | turquoise    | 1506.9 | 1506.34 | 0.990108 | 0.001179 | 5.622    |
| gi 115552177 dbj AK230486.1 | green        | 120.1  | 22.2265 | 0.756937 | 0.138487 | 1496.508 |
| gi 115552187 dbj AK230496.1 | turquoise    | 938.65 | 935.349 | 0.879464 | 0.049317 | 72.87    |
| gi 115552213 dbj AK230522.1 | turquoise    | 1527.9 | 1527.45 | 0.992624 | 0.00076  | 14.82    |
| gi 115552215 dbj AK230524.1 | turquoise    | 1267.5 | 1266.13 | 0.950689 | 0.013047 | 6.93     |
| gi 115552216 dbj AK230525.1 | turquoise    | 1561.2 | 1560.82 | 0.997815 | 0.000123 | 5.488    |
| gi 115552220 dbj AK230529.1 | turquoise    | 994.6  | 993.05  | 0.890442 | 0.042809 | 19.208   |
| gi 115552242 dbj AK230551.1 | turquoise    | 1417.8 | 1417.01 | 0.978593 | 0.003748 | 13.082   |
| gi 115552246 dbj AK230555.1 | turquoise    | 1256.6 | 1255.44 | 0.944473 | 0.015575 | 18.608   |
| gi 115552250 dbj AK230559.1 | blue         | 301.81 | 132.392 | 0.959404 | 0.009759 | 120.304  |
| gi 115552260 dbj AK230569.1 | purple       | 212.21 | 36.2755 | 0.997889 | 0.000116 | 93.67    |
| gi 115552265 dbj AK230574.1 | purple       | 208.91 | 26.2659 | 0.9191   | 0.027284 | 32.124   |
| gi 115552269 dbj AK230578.1 | salmon       | 107.57 | 25.4944 | 0.942316 | 0.016486 | 217.304  |
| gi 115552281 dbj AK230590.1 | turquoise    | 1539.3 | 1538.88 | 0.993449 | 0.000636 | 31.058   |
| gi 115552282 dbj AK230591.1 | greenyellow  | 77.515 | 7.0156  | -0.11436 | 0.854715 | 170.878  |
| gi 115552285 dbj AK230594.1 | turquoise    | 1516.5 | 1516.06 | 0.989856 | 0.001224 | 3.29     |
| gi 115552309 dbj AK230619.1 | purple       | 160.96 | 27.6448 | 0.92814  | 0.022873 | 211.136  |
| gi 115552311 dbj AK230621.1 | turquoise    | 1405.5 | 1404.94 | 0.976987 | 0.004176 | 44.86    |
| gi 115552314 dbj AK230624.1 | turquoise    | 406.05 | 398.719 | 0.672208 | 0.213861 | 54.536   |
| gi 115552353 dbj AK232758.1 | turquoise    | 814.1  | 810.117 | 0.847625 | 0.069746 | 17.754   |
| gi 115552369 dbj AK236374.1 | turquoise    | 1143.9 | 1142.01 | 0.927744 | 0.023061 | 32.044   |
| gi 115552393 dbj AK236398.1 | brown        | 222.3  | 110.274 | 0.959119 | 0.009861 | 9.932    |
| gi 115552399 dbj AK236404.1 | grey         | 306.39 | 17.5046 | 0.972333 | 0.005501 | 74.198   |
| gi 115552402 dbj AK236407.1 | turquoise    | 1544.9 | 1544.49 | 0.996456 | 0.000253 | 7.48     |
| gi 115552411 dbj AK236416.1 | blue         | 254.93 | 122.316 | 0.941125 | 0.016997 | 57.48    |
| gi 115552412 dbj AK236417.1 | turquoise    | 1561.8 | 1561.36 | 0.998212 | 9.07E-05 | 4.318    |
| gi 115552415 dbj AK236420.1 | lightyellow  | 298.53 | 23.7437 | 0.977006 | 0.004171 | 11.102   |
| gi 115552428 dbj AK236433.1 | salmon       | 247.79 | 27.2813 | 0.948673 | 0.013851 | 116.852  |
| gi 115552430 dbj AK236435.1 | turquoise    | 645.03 | 638.701 | 0.793279 | 0.109261 | 34.206   |
| gi 115552448 dbj AK236453.1 | turquoise    | 1443.4 | 1442.95 | 0.976526 | 0.004302 | 14.526   |
| gi 115552473 dbj AK236478.1 | turquoise    | 1365.1 | 1364.07 | 0.967721 | 0.006928 | 90.036   |
| gi 115552482 dbj AK236487.1 | brown        | 114.22 | 49.4657 | 0.758528 | 0.137165 | 6.222    |
| gi 115552494 dbj AK236499.1 | turquoise    | 1527.8 | 1527.26 | 0.994483 | 0.000492 | 9.328    |
| gi 115552519 dbj AK236524.1 | green        | 185.05 | 50.9591 | 0.986556 | 0.001867 | 48.56    |
| gi 115552523 dbj AK236528.1 | brown        | 226.44 | 82.4642 | 0.896398 | 0.039402 | 90.916   |
| gi 115552527 dbj AK236532.1 | green        | 104.08 | 28.5043 | 0.835992 | 0.077741 | 39.638   |
| gi 115552537 dbj AK236542.1 | turquoise    | 779.92 | 777.257 | 0.843206 | 0.072751 | 16.982   |
| gi 115552575 dbj AK232780.1 | red          | 188.46 | 48.0601 | 0.978849 | 0.003681 | 9.784    |
| gi 115552593 dbj AK232798.1 | turquoise    | 1440.9 | 1440.44 | 0.976101 | 0.004419 | 7.156    |
| gi 115552602 dbj AK232807.1 | salmon       | 230.66 | 28.9222 | 0.971792 | 0.005663 | 69.362   |
| gi 115552623 dbj AK232828.1 | brown        | 314.65 | 103.35  | 0.929264 | 0.022342 | 11.16    |
| gi 115552627 dbj AK232832.1 | turquoise    | 168.89 | 132.063 | 0.429563 | 0.470383 | 2.124    |
| gi 115552638 dbj AK232843.1 | midnightblue | 164.04 | 28.7866 | 0.9464   | 0.014776 | 3.086    |

|                             |               |        |         |          |          |         |
|-----------------------------|---------------|--------|---------|----------|----------|---------|
| gi 115552724 dbj AK232929.1 | turquoise     | 37.617 | 26.5676 | 0.171953 | 0.782146 | 40.052  |
| gi 115552725 dbj AK232930.1 | turquoise     | 1483.1 | 1482.47 | 0.988202 | 0.001536 | 14.884  |
| gi 115552766 dbj AK239359.1 | turquoise     | 1355.1 | 1354.08 | 0.968415 | 0.006706 | 36.628  |
| gi 115552791 dbj AK239385.1 | brown         | 237.41 | 124.71  | 0.989653 | 0.001261 | 49.456  |
| gi 115552800 dbj AK239394.1 | turquoise     | 1462.3 | 1461.7  | 0.980905 | 0.003158 | 12.556  |
| gi 115552819 dbj AK239413.1 | green         | 187.92 | 49.439  | 0.984631 | 0.002282 | 19.388  |
| gi 115552841 dbj AK239435.1 | greenyellow   | 182.78 | 22.6311 | 0.986595 | 0.001859 | 4.008   |
| gi 115552842 dbj AK239436.1 | grey          | 269    | 15.2521 | 0.913354 | 0.030215 | 431.184 |
| gi 115552865 dbj AK239459.1 | grey          | 283.31 | 15.3666 | 0.910355 | 0.031783 | 34.524  |
| gi 115552903 dbj AK239497.1 | turquoise     | 536.07 | 523.397 | 0.732034 | 0.159653 | 232.17  |
| gi 115552930 dbj AK239524.1 | turquoise     | 346.68 | 323.121 | 0.616356 | 0.268227 | 9.336   |
| gi 115552944 dbj AK239538.1 | tan           | 340.83 | 35.4057 | 0.963382 | 0.008365 | 50.872  |
| gi 115552956 dbj AK239550.1 | yellow        | 241.95 | 45.0467 | 0.791027 | 0.111101 | 15.82   |
| gi 115552967 dbj AK239553.1 | turquoise     | 1052.5 | 1050.69 | 0.900343 | 0.037196 | 9.89    |
| gi 115552977 dbj AK239563.1 | purple        | 174.57 | 31.0413 | 0.963673 | 0.008266 | 90.462  |
| gi 115552989 dbj AK239575.1 | red           | 148.78 | 34.3256 | 0.906126 | 0.034036 | 19.912  |
| gi 115553014 dbj AK239600.1 | grey60        | 268.5  | 32.71   | 0.994818 | 0.000447 | 24.166  |
| gi 115553025 dbj AK239611.1 | blue          | 318.65 | 107.525 | 0.911465 | 0.0312   | 159.888 |
| gi 115553034 dbj AK239620.1 | turquoise     | 1139.8 | 1139.28 | 0.927807 | 0.023031 | 69.82   |
| gi 115553038 dbj AK239624.1 | brown         | 280.02 | 107.875 | 0.949507 | 0.013516 | 330.476 |
| gi 115553060 dbj AK239646.1 | navy          | 247.72 | 30.1321 | 0.96408  | 0.008128 | 83.924  |
| gi 115553080 dbj AK239666.1 | turquoise     | 1166.6 | 1164.97 | 0.933717 | 0.02028  | 22.234  |
| gi 115553090 dbj AK239676.1 | turquoise     | 643.29 | 642.553 | 0.8061   | 0.09946  | 38.74   |
| gi 115553094 dbj AK239680.1 | turquoise     | 1387   | 1386.06 | 0.97259  | 0.005425 | 17.062  |
| gi 115553103 dbj AK239689.1 | yellow        | 163.35 | 56.1824 | 0.896977 | 0.039076 | 78.516  |
| gi 115553121 dbj AK239707.1 | brown         | 325.24 | 94.8637 | 0.909527 | 0.03222  | 105.31  |
| gi 115553137 dbj AK239723.1 | turquoise     | 1568.9 | 1568.55 | 0.999366 | 1.92E-05 | 58.992  |
| gi 115553166 dbj AK232966.1 | darkturquoise | 147.8  | 13.6578 | 0.926516 | 0.023647 | 17.114  |
| gi 115553171 dbj AK232969.1 | yellow        | 84.755 | 33.9497 | 0.750787 | 0.143631 | 103.796 |
| gi 115553187 dbj AK232985.1 | turquoise     | 1460.8 | 1460.1  | 0.983495 | 0.002539 | 6.554   |
| gi 115553196 dbj AK232994.1 | greenyellow   | 56.202 | 6.00697 | -0.12003 | 0.847546 | 19.162  |
| gi 115553202 dbj AK233000.1 | grey          | 285.77 | 15.9799 | 0.940913 | 0.017088 | 71.268  |
| gi 115553209 dbj AK233007.1 | turquoise     | 1497.2 | 1496.81 | 0.987804 | 0.001614 | 75.494  |
| gi 115553216 dbj AK233014.1 | turquoise     | 1508.1 | 1507.72 | 0.988104 | 0.001555 | 5.93    |
| gi 115553226 dbj AK233024.1 | turquoise     | 1544.3 | 1543.82 | 0.996614 | 0.000236 | 55.87   |
| gi 115553231 dbj AK233029.1 | turquoise     | 1376.2 | 1375.4  | 0.970926 | 0.005925 | 118.474 |
| gi 115553328 dbj AK233126.1 | greenyellow   | 252.17 | 17.5586 | 0.935895 | 0.019295 | 66.178  |
| gi 115553331 dbj AK233129.1 | tan           | 245.78 | 32.3014 | 0.946204 | 0.014857 | 2.76    |
| gi 115553344 dbj AK233142.1 | turquoise     | 127.1  | 96.058  | 0.366367 | 0.544183 | 8.966   |
| gi 115553351 dbj AK233149.1 | black         | 217.67 | 32.9392 | 0.931257 | 0.021411 | 16.802  |
| gi 115553370 dbj AK236573.1 | turquoise     | 1359.2 | 1358.5  | 0.962638 | 0.008621 | 29.014  |
| gi 115553373 dbj AK236576.1 | turquoise     | 134.26 | 76.2413 | 0.247299 | 0.688369 | 191.344 |
| gi 115553396 dbj AK236599.1 | turquoise     | 1541.2 | 1540.73 | 0.996345 | 0.000265 | 8.912   |
| gi 115553398 dbj AK236601.1 | darkturquoise | 210.91 | 15.2288 | 0.943553 | 0.015962 | 31.09   |
| gi 115553400 dbj AK236603.1 | turquoise     | 98.403 | 50.5415 | 0.199001 | 0.748306 | 2.668   |
| gi 115553414 dbj AK236617.1 | tan           | 320.63 | 38.4461 | 0.983132 | 0.002623 | 31.808  |
| gi 115553434 dbj AK236637.1 | lightyellow   | 301.82 | 25.5428 | 0.994942 | 0.000432 | 11.5    |
| gi 115553451 dbj AK236654.1 | turquoise     | 1466.4 | 1465.71 | 0.983049 | 0.002642 | 42.71   |

|                             |              |        |         |          |          |         |
|-----------------------------|--------------|--------|---------|----------|----------|---------|
| gi 115553452 dbj AK236655.1 | turquoise    | 1101.1 | 1099.92 | 0.909083 | 0.032456 | 80.03   |
| gi 115553453 dbj AK236656.1 | turquoise    | 1390.5 | 1389.9  | 0.969763 | 0.006283 | 21.354  |
| gi 115553457 dbj AK236660.1 | turquoise    | 697.33 | 693.919 | 0.808429 | 0.09771  | 34.586  |
| gi 115553468 dbj AK236671.1 | brown        | 290.99 | 113.969 | 0.958188 | 0.010198 | 117.404 |
| gi 115553471 dbj AK236674.1 | red          | 167.69 | 43.5627 | 0.956975 | 0.010644 | 46.508  |
| gi 115553473 dbj AK236676.1 | blue         | 332.11 | 99.8909 | 0.895082 | 0.040147 | 21.6    |
| gi 115553496 dbj AK236699.1 | turquoise    | 1495.1 | 1494.65 | 0.985702 | 0.002048 | 33.684  |
| gi 115553497 dbj AK236700.1 | lightgreen   | 71.372 | 16.498  | 0.997081 | 0.000189 | 491.272 |
| gi 115553524 dbj AK236727.1 | lightgreen   | 49.288 | 12.8666 | 0.842336 | 0.073348 | 15.118  |
| gi 115553527 dbj AK236730.1 | brown        | 199.63 | 99.9662 | 0.942855 | 0.016257 | 19.694  |
| gi 115553549 dbj AK236752.1 | navy         | 277.8  | 32.3848 | 0.982516 | 0.002768 | 103.616 |
| gi 115553569 dbj AK239756.1 | blue         | 287.17 | 141.185 | 0.973239 | 0.005234 | 89.178  |
| gi 115553571 dbj AK239758.1 | turquoise    | 1498.6 | 1498.2  | 0.987869 | 0.001601 | 37.594  |
| gi 115553590 dbj AK239777.1 | turquoise    | 969.11 | 967.26  | 0.888004 | 0.044229 | 23.882  |
| gi 115553601 dbj AK239788.1 | brown        | 212.33 | 119.282 | 0.979189 | 0.003593 | 13.296  |
| gi 115553671 dbj AK239858.1 | yellow       | 221.79 | 60.2682 | 0.910706 | 0.031598 | 171.656 |
| gi 115553700 dbj AK239887.1 | magenta      | 310.77 | 43.0285 | 0.986825 | 0.001812 | 42.238  |
| gi 115553719 dbj AK239906.1 | salmon       | 148.97 | 28.8172 | 0.9792   | 0.00359  | 127.23  |
| gi 115553726 dbj AK239913.1 | turquoise    | 1553.4 | 1553.01 | 0.996891 | 0.000208 | 23.416  |
| gi 115553748 dbj AK239935.1 | blue         | 328.48 | 150.915 | 0.988896 | 0.001402 | 36.944  |
| gi 115553764 dbj AK236768.1 | turquoise    | 1497.1 | 1496.64 | 0.988696 | 0.00144  | 2.458   |
| gi 115553811 dbj AK236816.1 | turquoise    | 1366.4 | 1365.67 | 0.963794 | 0.008225 | 18.052  |
| gi 115553814 dbj AK236819.1 | brown        | 277.64 | 123.55  | 0.983357 | 0.002571 | 75.126  |
| gi 115553862 dbj AK236867.1 | turquoise    | 1483.7 | 1483.22 | 0.985621 | 0.002065 | 4.544   |
| gi 115553967 dbj AK233176.1 | turquoise    | 1373.9 | 1373.33 | 0.96628  | 0.007395 | 37.388  |
| gi 115553998 dbj AK233207.1 | turquoise    | 1530.5 | 1530.06 | 0.994503 | 0.000489 | 5.032   |
| gi 115554002 dbj AK233211.1 | turquoise    | 1504   | 1503.61 | 0.988342 | 0.001508 | 5.064   |
| gi 115554007 dbj AK233216.1 | turquoise    | 61.945 | 52.519  | 0.300167 | 0.623635 | 0.674   |
| gi 115554022 dbj AK233231.1 | red          | 256.59 | 45.3366 | 0.962973 | 0.008505 | 152.784 |
| gi 115554027 dbj AK233236.1 | turquoise    | 1368.6 | 1367.55 | 0.969873 | 0.006249 | 40.63   |
| gi 115554046 dbj AK233255.1 | turquoise    | 1553.6 | 1553.18 | 0.996528 | 0.000245 | 0.378   |
| gi 115554063 dbj AK233272.1 | turquoise    | 1569.1 | 1568.74 | 0.999649 | 7.88E-06 | 16.862  |
| gi 115554075 dbj AK233284.1 | turquoise    | 962.01 | 958.416 | 0.883168 | 0.047089 | 128.58  |
| gi 115554089 dbj AK233298.1 | yellow       | 124.73 | 43.5583 | 0.826509 | 0.084452 | 9.822   |
| gi 115554124 dbj AK233334.1 | black        | 293.33 | 40.2721 | 0.980318 | 0.003305 | 126.866 |
| gi 115554129 dbj AK233339.1 | turquoise    | 1552   | 1551.63 | 0.99728  | 0.00017  | 26.128  |
| gi 115554130 dbj AK233340.1 | yellow       | 132.63 | 49.9609 | 0.861882 | 0.060326 | 44.144  |
| gi 115554132 dbj AK233342.1 | midnightblue | 203.25 | 33.493  | 0.977947 | 0.003918 | 6.814   |
| gi 115554133 dbj AK233343.1 | navy         | 222.65 | 28.4815 | 0.957307 | 0.010521 | 94.646  |
| gi 115554167 dbj AK239962.1 | turquoise    | 1558.9 | 1558.54 | 0.997928 | 0.000113 | 9.9     |
| gi 115554174 dbj AK239969.1 | turquoise    | 1122.5 | 1120.78 | 0.925224 | 0.024269 | 15.384  |
| gi 115554233 dbj AK240028.1 | turquoise    | 1571.4 | 1571.02 | 0.999774 | 4.07E-06 | 1.828   |
| gi 115554282 dbj AK240077.1 | turquoise    | 274.6  | 240.848 | 0.528383 | 0.36001  | 299.774 |
| gi 115554284 dbj AK240079.1 | turquoise    | 115.58 | 89.5669 | 0.329144 | 0.588616 | 31.662  |
| gi 115554299 dbj AK240094.1 | grey60       | 217.98 | 31.9371 | 0.9897   | 0.001253 | 175.436 |
| gi 115554303 dbj AK240098.1 | turquoise    | 1321.9 | 1320.84 | 0.962201 | 0.008772 | 28.906  |
| gi 115554309 dbj AK240104.1 | magenta      | 234.88 | 25.9444 | 0.882545 | 0.047461 | 11.014  |
| gi 115554312 dbj AK240107.1 | yellow       | 282.65 | 70.3144 | 0.93481  | 0.019784 | 217.844 |



|                             |               |        |         |          |          |         |
|-----------------------------|---------------|--------|---------|----------|----------|---------|
| gi 115554315 dbj AK240110.1 | lightcyan     | 270.33 | 25.1504 | 0.972668 | 0.005402 | 30.296  |
| gi 115554351 dbj AK240146.1 | turquoise     | 1503.2 | 1502.76 | 0.989919 | 0.001213 | 40.826  |
| gi 115554358 dbj AK233368.1 | turquoise     | 215.83 | 167.205 | 0.43259  | 0.466906 | 78.666  |
| gi 115554371 dbj AK233381.1 | turquoise     | 1429.5 | 1428.84 | 0.979393 | 0.00354  | 73.068  |
| gi 115554372 dbj AK233382.1 | purple        | 237.32 | 33.1393 | 0.977241 | 0.004107 | 59.254  |
| gi 115554373 dbj AK233383.1 | salmon        | 206.64 | 29.0284 | 0.968779 | 0.006591 | 26.776  |
| gi 115554376 dbj AK233386.1 | turquoise     | 480.53 | 473.711 | 0.733066 | 0.158759 | 24.874  |
| gi 115554409 dbj AK233419.1 | midnightblue  | 251.57 | 35.6065 | 0.990835 | 0.001052 | 232.884 |
| gi 115554410 dbj AK233420.1 | darkred       | 114.41 | 11.7624 | 0.874915 | 0.052098 | 164.778 |
| gi 115554415 dbj AK233425.1 | turquoise     | 1486.6 | 1486    | 0.987024 | 0.001771 | 21.904  |
| gi 115554417 dbj AK233427.1 | blue          | 188.62 | 83.2891 | 0.856073 | 0.064112 | 24.136  |
| gi 115554452 dbj AK233462.1 | turquoise     | 1558.6 | 1558.15 | 0.997906 | 0.000115 | 7.258   |
| gi 115554459 dbj AK233469.1 | blue          | 296.17 | 146.445 | 0.982156 | 0.002854 | 19.05   |
| gi 115554492 dbj AK233502.1 | turquoise     | 1518.5 | 1517.96 | 0.992565 | 0.000769 | 25.046  |
| gi 115554528 dbj AK233538.1 | greenyellow   | 143.9  | 19.0739 | 0.950998 | 0.012925 | 19.244  |
| gi 115554532 dbj AK233542.1 | lightcyan     | 290.44 | 25.6572 | 0.981093 | 0.003112 | 124.416 |
| gi 115554563 dbj AK236973.1 | black         | 293.44 | 41.4012 | 0.984349 | 0.002345 | 22.35   |
| gi 115554566 dbj AK236976.1 | midnightblue  | 264.72 | 30.8505 | 0.959952 | 0.009563 | 16.28   |
| gi 115554588 dbj AK236998.1 | turquoise     | 1556.5 | 1556.1  | 0.996844 | 0.000213 | 40.588  |
| gi 115554610 dbj AK237020.1 | turquoise     | 1368.1 | 1367.17 | 0.968562 | 0.00666  | 30.334  |
| gi 115554617 dbj AK237028.1 | turquoise     | 162.21 | 140.733 | 0.452048 | 0.444686 | 5.362   |
| gi 115554649 dbj AK237060.1 | turquoise     | 58.808 | 22.0805 | 0.107251 | 0.863706 | 15.64   |
| gi 115554680 dbj AK237091.1 | turquoise     | 1456.7 | 1455.98 | 0.983785 | 0.002473 | 21.26   |
| gi 115554713 dbj AK237124.1 | green         | 96.787 | 26.0815 | 0.808159 | 0.097912 | 14.308  |
| gi 115554725 dbj AK237136.1 | turquoise     | 1290.8 | 1289.99 | 0.95248  | 0.012346 | 18.766  |
| gi 115554738 dbj AK237149.1 | blue          | 314.41 | 123.722 | 0.943296 | 0.016071 | 11.878  |
| gi 115554762 dbj AK233574.1 | blue          | 214.1  | 93.6038 | 0.880702 | 0.048569 | 98.264  |
| gi 115554769 dbj AK233581.1 | turquoise     | 1420.4 | 1419.98 | 0.973404 | 0.005186 | 17.066  |
| gi 115554826 dbj AK233638.1 | turquoise     | 675.8  | 667.707 | 0.794417 | 0.10838  | 110.256 |
| gi 115554840 dbj AK233652.1 | turquoise     | 505.86 | 491.869 | 0.716403 | 0.173376 | 31.388  |
| gi 115554855 dbj AK233667.1 | turquoise     | 1104.2 | 1103.33 | 0.922111 | 0.025787 | 22.766  |
| gi 115554857 dbj AK233669.1 | grey          | 314.47 | 16.4533 | 0.940244 | 0.017377 | 181.488 |
| gi 115554899 dbj AK233711.1 | turquoise     | 1170.4 | 1169.82 | 0.934907 | 0.01974  | 84.312  |
| gi 115554919 dbj AK233731.1 | turquoise     | 1120.4 | 1118.53 | 0.923164 | 0.02527  | 94.22   |
| gi 115554929 dbj AK233741.1 | green         | 250.97 | 40.4263 | 0.900733 | 0.03698  | 11.244  |
| gi 115554973 dbj AK240172.1 | yellow        | 282.09 | 72.4601 | 0.938554 | 0.018115 | 42.182  |
| gi 115554977 dbj AK240176.1 | turquoise     | 1133.6 | 1132.64 | 0.91678  | 0.028456 | 14.732  |
| gi 115554982 dbj AK240181.1 | darkturquoise | 167.77 | 17.5162 | 0.985978 | 0.001989 | 90.776  |
| gi 115554993 dbj AK240192.1 | turquoise     | 1527.6 | 1527.2  | 0.991652 | 0.000914 | 3.97    |
| gi 115555012 dbj AK240211.1 | turquoise     | 1012.6 | 1010.42 | 0.902878 | 0.0358   | 208.94  |
| gi 115555020 dbj AK240219.1 | turquoise     | 961.76 | 959.13  | 0.88558  | 0.045655 | 24.182  |
| gi 115555021 dbj AK240220.1 | turquoise     | 1543.3 | 1542.93 | 0.994314 | 0.000514 | 30.804  |
| gi 115555023 dbj AK240222.1 | turquoise     | 1221   | 1219.7  | 0.937136 | 0.018741 | 55.294  |
| gi 115555058 dbj AK240257.1 | purple        | 127.35 | 13.0906 | 0.739673 | 0.153067 | 52.632  |
| gi 115555063 dbj AK240262.1 | green         | 153.3  | 31.7696 | 0.857884 | 0.062924 | 28.772  |
| gi 115555097 dbj AK240296.1 | turquoise     | 235    | 209.777 | 0.511209 | 0.378689 | 64.742  |
| gi 115555129 dbj AK240329.1 | brown         | 172.18 | 82.6702 | 0.896854 | 0.039145 | 152.368 |
| gi 115555134 dbj AK240334.1 | turquoise     | 1553.3 | 1552.9  | 0.996645 | 0.000233 | 8.87    |

|                                 |           |        |         |          |          |         |
|---------------------------------|-----------|--------|---------|----------|----------|---------|
| gi 115555150 dbj AK233765.1     | salmon    | 184.89 | 27.0445 | 0.950821 | 0.012995 | 98.898  |
| gi 115555162 dbj AK233777.1     | turquoise | 159.31 | 121.118 | 0.417785 | 0.483966 | 58.212  |
| gi 115555163 dbj AK233778.1     | grey      | 77.274 | 7.90457 | 0.032561 | 0.95855  | 64.804  |
| gi 115555188 dbj AK233803.1     | blue      | 310.38 | 144.924 | 0.980055 | 0.003371 | 41.642  |
| gi 115555249 dbj AK233864.1     | turquoise | 575.13 | 567.496 | 0.762126 | 0.134189 | 20.074  |
| gi 115555306 dbj AK233921.1     | turquoise | 457.92 | 455.051 | 0.722953 | 0.167586 | 24.126  |
| gi 115555322 dbj AK233937.1     | turquoise | 440.42 | 432.172 | 0.707277 | 0.181537 | 24.036  |
| gi 115555353 dbj AK233966.1     | lightcyan | 292.25 | 24.6414 | 0.964724 | 0.007911 | 20.3    |
| gi 115555354 dbj AK233967.1     | brown     | 188.82 | 92.2685 | 0.912911 | 0.030446 | 29.302  |
| gi 115555420 dbj AK234033.1     | brown     | 180.13 | 108.7   | 0.957044 | 0.010618 | 20.712  |
| gi 115555451 dbj AK234064.1     | turquoise | 1285.6 | 1284.44 | 0.955875 | 0.011053 | 38.33   |
| gi 115555475 dbj AK234088.1     | turquoise | 198.27 | 182.491 | 0.490783 | 0.401196 | 18.794  |
| gi 115555495 dbj AK234108.1     | turquoise | 1393.1 | 1392.43 | 0.970383 | 0.006091 | 38.71   |
| gi 115555527 dbj AK234140.1     | blue      | 331.21 | 105.483 | 0.907441 | 0.03333  | 24.796  |
| gi 115555541 dbj AK237173.1     | turquoise | 133.77 | 115.389 | 0.423639 | 0.477205 | 51.576  |
| gi 115555561 dbj AK237193.1     | brown     | 229.02 | 105.081 | 0.947978 | 0.014132 | 4.17    |
| gi 115555567 dbj AK237199.1     | turquoise | 145.96 | 45.9975 | 0.120142 | 0.847399 | 3.008   |
| gi 115555619 dbj AK237252.1     | turquoise | 918.18 | 916.477 | 0.86607  | 0.05764  | 84.994  |
| gi 115555639 dbj AK237272.1     | green     | 229.92 | 53.2706 | 0.982111 | 0.002865 | 154.294 |
| gi 115555653 dbj AK237286.1     | turquoise | 99.539 | 34.7291 | 0.1016   | 0.870862 | 83.954  |
| gi 115555675 dbj AK237308.1     | turquoise | 858.49 | 854.217 | 0.857387 | 0.06325  | 17.792  |
| gi 115555693 dbj AK237326.1     | turquoise | 1355.5 | 1354.45 | 0.968013 | 0.006834 | 57.284  |
| gi 115555697 dbj AK237330.1     | darkgreen | 201.41 | 20.6525 | 0.952691 | 0.012264 | 2.984   |
| gi 117661185 gb DQ629176.1      | grey      | 224.44 | 14.404  | 0.887747 | 0.044379 | 281.95  |
| gi 118403765 ref NM_001078687.1 | salmon    | 238.69 | 28.185  | 0.959206 | 0.00983  | 209.95  |
| gi 118403777 ref NM_001078685.1 | turquoise | 1409.8 | 1409.23 | 0.970601 | 0.006024 | 13.598  |
| gi 118403821 ref NM_001078679.1 | turquoise | 1532   | 1531.59 | 0.994454 | 0.000495 | 31.586  |
| gi 118403911 ref NM_001078662.1 | green     | 100.82 | 22.6464 | 0.767356 | 0.129899 | 95.426  |
| gi 124558111 gb EF154832.1      | turquoise | 1553   | 1552.51 | 0.997952 | 0.000111 | 6.294   |
| gi 1245714 gb S80644.1          | turquoise | 1254.7 | 1254.13 | 0.946934 | 0.014557 | 21.028  |
| gi 125630297 ref NM_001005152.2 | pink      | 230.9  | 46.899  | 0.993368 | 0.000648 | 32.382  |
| gi 125630305 ref NM_214281.2    | turquoise | 1484.7 | 1484.3  | 0.984849 | 0.002234 | 6.718   |
| gi 138753472 emb AM503091.1     | turquoise | 1519   | 1518.51 | 0.992617 | 0.000761 | 29.524  |
| gi 139530445 gb EF486522.1      | salmon    | 212.29 | 29.668  | 0.981482 | 0.003016 | 527.782 |
| gi 146198449 dbj AB292846.1     | blue      | 344.42 | 114.713 | 0.92573  | 0.024025 | 28.852  |
| gi 146741279 dbj AB271920.1     | turquoise | 1481.9 | 1481.54 | 0.986081 | 0.001967 | 8.696   |
| gi 147899058 ref NM_001097509.1 | pink      | 271.08 | 38.2974 | 0.941298 | 0.016922 | 37.162  |
| gi 147900046 ref NM_001097474.1 | lightcyan | 299.88 | 25.4673 | 0.976217 | 0.004387 | 258.694 |
| gi 147900501 ref NM_001097506.1 | turquoise | 1091.8 | 1090.65 | 0.906993 | 0.03357  | 9.732   |
| gi 147902484 ref NM_001097419.1 | turquoise | 1436   | 1435.28 | 0.980487 | 0.003262 | 46.312  |
| gi 147903738 ref NM_001097413.1 | turquoise | 1494.8 | 1494.41 | 0.986026 | 0.001979 | 7.002   |
| gi 147905343 ref NM_001097438.1 | turquoise | 1209.6 | 1208.7  | 0.933332 | 0.020456 | 7.538   |
| gi 147906088 ref NM_213946.2    | grey      | 273.66 | 12.2692 | 0.816903 | 0.091423 | 50.504  |
| gi 148222590 ref NM_001097486.1 | lightcyan | 281.29 | 25.6915 | 0.972783 | 0.005368 | 43.282  |
| gi 148223598 ref NM_001097476.1 | magenta   | 337.18 | 44.0052 | 0.991056 | 0.001014 | 87.812  |
| gi 148224637 ref NM_001097469.1 | salmon    | 74.34  | 16.4121 | 0.833091 | 0.079775 | 34.502  |
| gi 148225749 ref NM_001097504.1 | turquoise | 1283.6 | 1282.91 | 0.955928 | 0.011033 | 18.95   |
| gi 148228719 ref NM_001097439.1 | turquoise | 1133.9 | 1131.84 | 0.924502 | 0.024618 | 105.792 |

|                                    |              |        |         |          |          |         |
|------------------------------------|--------------|--------|---------|----------|----------|---------|
| gi 148230690 ref NM_001097489.1    | darkred      | 74.672 | 9.64525 | 0.817787 | 0.090774 | 1.78    |
| gi 148231659 ref NM_001097516.1    | turquoise    | 1519.8 | 1519.41 | 0.99088  | 0.001044 | 3.378   |
| gi 148232727 ref NM_001097447.1    | turquoise    | 1546.7 | 1546.2  | 0.997007 | 0.000197 | 22.466  |
| gi 148233297 ref NM_001097485.1    | turquoise    | 1535   | 1534.57 | 0.99444  | 0.000497 | 45.768  |
| gi 148234109 ref NM_001093735.1    | turquoise    | 164.05 | 147.916 | 0.459529 | 0.436209 | 29.658  |
| gi 148235350 ref NM_001097475.1    | navy         | 263.75 | 27.4338 | 0.946175 | 0.014869 | 83.108  |
| gi 148237120 ref NM_001097421.1    | turquoise    | 1429.2 | 1428.72 | 0.974256 | 0.004939 | 17.84   |
| gi 148237281 ref NM_001097478.1    | turquoise    | 744.91 | 740.844 | 0.821507 | 0.08806  | 526.736 |
| gi 148747452 ref NM_001098603.1    | turquoise    | 1527   | 1526.57 | 0.993521 | 0.000625 | 5.552   |
| gi 149364039 gb EF468461.1         | salmon       | 256.52 | 25.4571 | 0.92837  | 0.022764 | 62.83   |
| gi 149944498 ref NM_214343.2       | turquoise    | 937.2  | 934.11  | 0.879462 | 0.049318 | 81.652  |
| gi 150246527 ref NM_001044575.2    | turquoise    | 463.22 | 457.303 | 0.708447 | 0.180484 | 24.58   |
| gi 153791354 ref NM_001099940.1    | turquoise    | 1442   | 1441.56 | 0.977221 | 0.004113 | 3.862   |
| gi 153791726 ref NM_001099925.1    | turquoise    | 1553.6 | 1553.18 | 0.996528 | 0.000245 | 0.378   |
| gi 153792026 ref NM_001099932.1    | midnightblue | 153.92 | 27.8061 | 0.938278 | 0.018236 | 324.414 |
| gi 153792048 ref NM_001099934.1    | turquoise    | 1200.7 | 1198.93 | 0.937656 | 0.018511 | 86.282  |
| gi 154147629 ref NM_001100190.1    | yellow       | 144.89 | 53.8581 | 0.882256 | 0.047634 | 109.278 |
| gi 155369755 ref NM_001101026.1    | turquoise    | 1174   | 1172.12 | 0.932838 | 0.020682 | 17.82   |
| gi 155369765 ref NM_001101031.1    | turquoise    | 1458.1 | 1457.53 | 0.984418 | 0.00233  | 13.62   |
| gi 156120135 ref NM_001101827.1    | turquoise    | 224.13 | 184.181 | 0.458661 | 0.437191 | 49.846  |
| gi 156151354 ref NM_001037146.2    | brown        | 267.45 | 127.346 | 0.990957 | 0.001031 | 82.46   |
| gi 157427686 ref NM_214374.2       | midnightblue | 192.45 | 33.5073 | 0.97793  | 0.003923 | 102.71  |
| gi 157427704 ref NM_001105288.1    | yellow       | 164.46 | 67.9264 | 0.941979 | 0.01663  | 8.99    |
| gi 157427710 ref NM_001105292.1    | turquoise    | 1472.8 | 1472.18 | 0.983553 | 0.002526 | 9.4     |
| gi 157427714 ref NM_001105294.1    | darkgreen    | 257.04 | 23.5947 | 0.990936 | 0.001034 | 14.842  |
| gi 157427721 ref NM_001105299.1    | lightcyan    | 272.49 | 26.0511 | 0.995164 | 0.000403 | 100.532 |
| gi 157427723 ref NM_001105300.1    | greenyellow  | 100.24 | 4.4091  | 0.358846 | 0.553108 | 66.934  |
| gi 157427727 ref NM_001105302.1    | turquoise    | 1477.2 | 1476.64 | 0.986818 | 0.001813 | 24.644  |
| gi 157427731 ref NM_001105304.1    | turquoise    | 1372.7 | 1372.16 | 0.966683 | 0.007264 | 41.878  |
| gi 15824733 gb AF329358.1 AF329358 | magenta      | 333.17 | 40.6207 | 0.973351 | 0.005201 | 20.066  |
| gi 158262676 ref NM_001109945.1    | turquoise    | 1502.9 | 1502.57 | 0.988217 | 0.001533 | 2.378   |
| gi 158262678 ref NM_001109946.1    | turquoise    | 1563.2 | 1562.84 | 0.997902 | 0.000115 | 2.164   |
| gi 158262680 ref NM_001109947.1    | green        | 88.225 | 18.9772 | 0.72815  | 0.163032 | 45.834  |
| gi 158631261 ref NM_001099936.1    | turquoise    | 165.81 | 151.631 | 0.498668 | 0.392472 | 83.53   |
| gi 15864598 emb AJ309014.1         | turquoise    | 109.81 | 87.0384 | 0.336249 | 0.580085 | 6.046   |
| gi 160420270 ref NM_001044582.1    | turquoise    | 1510   | 1509.59 | 0.989964 | 0.001205 | 125.334 |
| gi 162139822 ref NM_001111257.1    | turquoise    | 839.42 | 835.504 | 0.854533 | 0.065129 | 70.368  |
| gi 16304807 emb AJ416019.1         | blue         | 325.72 | 144.437 | 0.978425 | 0.003792 | 27.302  |
| gi 163310772 ref NM_001097521.2    | brown        | 175.72 | 106.694 | 0.956117 | 0.010962 | 50.094  |
| gi 164394 gb L10363.1 PIGBSP       | turquoise    | 1553.6 | 1553.18 | 0.996528 | 0.000245 | 8.314   |
| gi 164486 gb M29072.1 PIGHEP1      | turquoise    | 1557.8 | 1557.3  | 0.997993 | 0.000108 | 33.572  |
| gi 164518957 ref NM_001113287.1    | turquoise    | 363.8  | 343.232 | 0.624738 | 0.259858 | 592.974 |
| gi 164664445 ref NM_001113439.1    | tan          | 340.7  | 35.763  | 0.966943 | 0.007179 | 113.09  |
| gi 164664451 ref NM_001113442.1    | turquoise    | 173.22 | 155.494 | 0.455163 | 0.441152 | 23.3    |
| gi 165973437 ref NM_001113701.1    | turquoise    | 363.68 | 352.654 | 0.664381 | 0.221274 | 8.304   |
| gi 166796042 ref NM_001114275.1    | turquoise    | 1514.3 | 1513.78 | 0.992562 | 0.000769 | 18.392  |
| gi 166796054 ref NM_001114281.1    | turquoise    | 1402.4 | 1401.47 | 0.975169 | 0.00468  | 14.564  |
| gi 167908788 ref NM_001114675.1    | turquoise    | 1152.2 | 1150.51 | 0.92558  | 0.024097 | 66.502  |

|                                 |              |        |         |          |          |          |
|---------------------------------|--------------|--------|---------|----------|----------|----------|
| gi 167908790 ref NM_001114676.1 | turquoise    | 295.62 | 273.416 | 0.572332 | 0.313297 | 73.26    |
| gi 167908792 ref NM_001114670.1 | turquoise    | 1153.7 | 1152.42 | 0.921628 | 0.026026 | 78.072   |
| gi 167908796 ref NM_001114672.1 | turquoise    | 376.91 | 371.342 | 0.665921 | 0.21981  | 34.362   |
| gi 171905894 gb EU561660.1      | black        | 135.82 | 18.2969 | 0.779388 | 0.120187 | 265.254  |
| gi 172072681 ref NM_001122994.1 | turquoise    | 1570.2 | 1569.77 | 0.999543 | 1.17E-05 | 69.454   |
| gi 172073149 ref NM_001122990.1 | turquoise    | 251.45 | 229.488 | 0.536971 | 0.350756 | 36.442   |
| gi 178056483 ref NM_001123101.1 | black        | 250.32 | 36.4713 | 0.93181  | 0.021155 | 41.854   |
| gi 178056487 ref NM_001123204.1 | royalblue    | 162.72 | 19.3514 | 0.934473 | 0.019936 | 39.08    |
| gi 178056489 ref NM_001123144.1 | turquoise    | 1567.6 | 1567.15 | 0.99954  | 1.18E-05 | 15.676   |
| gi 178056503 ref NM_001123076.1 | pink         | 248.04 | 44.7127 | 0.980819 | 0.00318  | 170.728  |
| gi 178056505 ref NM_001123131.1 | turquoise    | 1473.2 | 1472.64 | 0.985108 | 0.002177 | 10.508   |
| gi 178056515 ref NM_001123121.1 | turquoise    | 1545.2 | 1544.8  | 0.995741 | 0.000333 | 39.804   |
| gi 178056521 ref NM_001123111.1 | turquoise    | 1024.2 | 1022.4  | 0.899715 | 0.037544 | 3.882    |
| gi 178056525 ref NM_001123147.1 | navy         | 192.04 | 25.3517 | 0.932299 | 0.02093  | 10.128   |
| gi 178056541 ref NM_001123177.1 | turquoise    | 1507.5 | 1507.03 | 0.989698 | 0.001253 | 1.04     |
| gi 178056566 ref NM_001123160.1 | turquoise    | 171.26 | 151.642 | 0.459812 | 0.435888 | 53.418   |
| gi 178056609 ref NM_001123174.1 | turquoise    | 1368   | 1367.39 | 0.969597 | 0.006335 | 24.954   |
| gi 178056622 ref NM_001123213.1 | turquoise    | 920.18 | 917.938 | 0.873528 | 0.052956 | 72.642   |
| gi 178056656 ref NM_001123157.1 | turquoise    | 1237.2 | 1236.1  | 0.947469 | 0.014338 | 82.412   |
| gi 178056662 ref NM_001123124.1 | turquoise    | 1549.1 | 1548.73 | 0.995732 | 0.000334 | 16.886   |
| gi 178056668 ref NM_001123099.1 | turquoise    | 201.11 | 184.906 | 0.493675 | 0.397991 | 251.118  |
| gi 178056676 ref NM_001123078.1 | turquoise    | 310.75 | 303.736 | 0.622852 | 0.261735 | 98.016   |
| gi 178056709 ref NM_001123194.1 | turquoise    | 1531.9 | 1531.49 | 0.993459 | 0.000634 | 14.114   |
| gi 178056780 ref NM_001123122.1 | blue         | 322.07 | 125.839 | 0.946743 | 0.014635 | 105.144  |
| gi 178056859 ref NM_001123091.1 | navy         | 226.48 | 30.4145 | 0.972299 | 0.005511 | 45.228   |
| gi 178056875 ref NM_001123200.1 | turquoise    | 1498.4 | 1497.81 | 0.989192 | 0.001347 | 17.032   |
| gi 178056883 ref NM_001123198.1 | turquoise    | 1460.8 | 1460.29 | 0.982058 | 0.002877 | 28.69    |
| gi 178057066 ref NM_001123096.1 | turquoise    | 1298.1 | 1297.27 | 0.957615 | 0.010408 | 33.866   |
| gi 178057176 ref NM_001123090.1 | turquoise    | 1486.3 | 1485.79 | 0.986853 | 0.001806 | 49.468   |
| gi 178057228 ref NM_001123071.1 | turquoise    | 1563.4 | 1563.06 | 0.998103 | 9.91E-05 | 31.864   |
| gi 178057315 ref NM_001123097.1 | turquoise    | 1208.5 | 1207.1  | 0.941869 | 0.016677 | 69.244   |
| gi 1841944 emb X95846.1         | midnightblue | 215.05 | 36.2315 | 0.994412 | 0.000501 | 5.86     |
| gi 186886351 gb EU617320.1      | turquoise    | 1502   | 1501.61 | 0.988646 | 0.00145  | 3.816    |
| gi 187672044 gb EU650276.1      | red          | 246.02 | 43.6677 | 0.95506  | 0.011359 | 8.976    |
| gi 190352252 gb EU780792.1      | turquoise    | 1553.7 | 1553.31 | 0.996728 | 0.000225 | 8.348    |
| gi 190360618 ref NM_001128433.1 | red          | 181.42 | 47.8391 | 0.977446 | 0.004052 | 26.03    |
| gi 190360622 ref NM_001128462.1 | turquoise    | 1513.6 | 1513.2  | 0.990733 | 0.001069 | 16.89    |
| gi 190360630 ref NM_001128465.1 | turquoise    | 496.6  | 491.058 | 0.733613 | 0.158285 | 59.79    |
| gi 190360646 ref NM_001128455.1 | turquoise    | 239.03 | 198.843 | 0.471202 | 0.423053 | 4.874    |
| gi 190360656 ref NM_001128470.1 | salmon       | 266.79 | 23.7253 | 0.909577 | 0.032194 | 88.004   |
| gi 190360658 ref NM_001128471.1 | turquoise    | 1523.9 | 1523.35 | 0.993818 | 0.000583 | 29.848   |
| gi 1912 emb X07617.1            | salmon       | 179.15 | 31.8921 | 0.998845 | 4.71E-05 | 37.168   |
| gi 1920 emb X15073.1            | turquoise    | 1545   | 1544.63 | 0.995228 | 0.000395 | 16.296   |
| gi 194018685 ref NM_001129963.1 | navy         | 268.32 | 29.0049 | 0.954202 | 0.011684 | 475.18   |
| gi 194018691 ref NM_001129967.1 | turquoise    | 1056.1 | 1054.76 | 0.905821 | 0.034201 | 2.908    |
| gi 194018701 ref NM_001129947.1 | pink         | 282.18 | 39.1265 | 0.947223 | 0.014439 | 4239.712 |
| gi 194018717 ref NM_001129954.1 | lightyellow  | 283.73 | 24.3574 | 0.974197 | 0.004956 | 5802.936 |
| gi 194018721 ref NM_001129949.1 | green        | 255.72 | 50.3454 | 0.960858 | 0.009241 | 3313.478 |

|                                 |               |        |         |          |          |         |
|---------------------------------|---------------|--------|---------|----------|----------|---------|
| gi 194033418 ref XM_001924233.1 | lightgreen    | 78.951 | 14.7114 | 0.956332 | 0.010882 | 79.502  |
| gi 194033446 ref XM_001927265.1 | turquoise     | 1537.4 | 1536.98 | 0.995797 | 0.000327 | 66.866  |
| gi 194033456 ref XM_001924731.1 | turquoise     | 1522.3 | 1521.89 | 0.992821 | 0.000729 | 5.918   |
| gi 194033493 ref XM_001924291.1 | yellow        | 163.83 | 42.9696 | 0.801428 | 0.102999 | 52.294  |
| gi 194033502 ref XM_001926129.1 | darkturquoise | 211.98 | 17.1556 | 0.977348 | 0.004079 | 30.822  |
| gi 194033556 ref XM_001927696.1 | turquoise     | 1483.4 | 1482.78 | 0.988547 | 0.001469 | 26.01   |
| gi 194033590 ref XM_001929195.1 | red           | 254.38 | 49.7468 | 0.983314 | 0.002581 | 201.388 |
| gi 194033594 ref XM_001927795.1 | turquoise     | 1561.8 | 1561.4  | 0.998176 | 9.35E-05 | 47.206  |
| gi 194033596 ref XM_001927813.1 | turquoise     | 1518.2 | 1517.8  | 0.992348 | 0.000803 | 7.738   |
| gi 194033603 ref XM_001925557.1 | turquoise     | 61.987 | 45.6704 | 0.274193 | 0.655312 | 3.528   |
| gi 194033615 ref XM_001924714.1 | turquoise     | 1514.6 | 1514.11 | 0.991982 | 0.000861 | 26.79   |
| gi 194033624 ref XM_001924823.1 | turquoise     | 1000.3 | 998.236 | 0.891333 | 0.042293 | 5.836   |
| gi 194033632 ref XM_001927932.1 | turquoise     | 1473.9 | 1473.29 | 0.983344 | 0.002574 | 7.962   |
| gi 194033649 ref XM_001925294.1 | turquoise     | 172.62 | 116.906 | 0.364076 | 0.546899 | 18.762  |
| gi 194033718 ref XM_001926719.1 | lightyellow   | 295.48 | 25.1233 | 0.981996 | 0.002892 | 31.812  |
| gi 194033747 ref XM_001927557.1 | turquoise     | 1185.1 | 1184.04 | 0.935369 | 0.019532 | 7.524   |
| gi 194033755 ref XM_001924851.1 | darkred       | 51.929 | 10.5237 | 0.898614 | 0.038158 | 52.224  |
| gi 194033834 ref XM_001924991.1 | turquoise     | 1415.3 | 1414.56 | 0.977511 | 0.004035 | 39.49   |
| gi 194033859 ref XM_001927866.1 | yellow        | 241.9  | 82.2804 | 0.989262 | 0.001334 | 197.16  |
| gi 194033869 ref XM_001924394.1 | turquoise     | 1420   | 1419.47 | 0.977545 | 0.004026 | 4.916   |
| gi 194033897 ref XM_001926189.1 | turquoise     | 1426.5 | 1425.88 | 0.977516 | 0.004034 | 11.414  |
| gi 194033899 ref XM_001928651.1 | turquoise     | 1553.6 | 1553.18 | 0.996528 | 0.000245 | 1.558   |
| gi 194033910 ref XM_001928928.1 | yellow        | 180.22 | 78.5059 | 0.980117 | 0.003356 | 63.556  |
| gi 194033956 ref XM_001926015.1 | turquoise     | 1550   | 1549.6  | 0.995851 | 0.000321 | 8.138   |
| gi 194033964 ref XM_001925719.1 | brown         | 253.16 | 128.302 | 0.996386 | 0.000261 | 5.85    |
| gi 194034057 ref XM_001924352.1 | turquoise     | 1516.7 | 1516.34 | 0.990922 | 0.001037 | 1.288   |
| gi 194034095 ref XM_001928221.1 | turquoise     | 939.66 | 938.234 | 0.889842 | 0.043157 | 1.686   |
| gi 194034109 ref XM_001927571.1 | turquoise     | 1094.8 | 1092.76 | 0.91551  | 0.029104 | 98.244  |
| gi 194034148 ref XM_001924679.1 | red           | 204.15 | 50.0207 | 0.987803 | 0.001614 | 26.202  |
| gi 194034150 ref XM_001927070.1 | turquoise     | 844.67 | 839.69  | 0.851037 | 0.067453 | 2.956   |
| gi 194034162 ref XM_001925693.1 | brown         | 290.24 | 104.96  | 0.93395  | 0.020174 | 59.212  |
| gi 194034170 ref XM_001924292.1 | turquoise     | 811.09 | 808.845 | 0.837946 | 0.076379 | 11.722  |
| gi 194034216 ref XM_001928595.1 | turquoise     | 227.47 | 213.548 | 0.528683 | 0.359684 | 77.6    |
| gi 194034220 ref XM_001928748.1 | turquoise     | 190.88 | 173.873 | 0.4887   | 0.403508 | 20.62   |
| gi 194034226 ref XM_001928937.1 | turquoise     | 527.91 | 521.661 | 0.74288  | 0.150326 | 194.496 |
| gi 194034244 ref XM_001925555.1 | turquoise     | 1561.8 | 1561.31 | 0.99843  | 7.47E-05 | 11.6    |
| gi 194034272 ref XM_001924582.1 | turquoise     | 1553.6 | 1553.18 | 0.996528 | 0.000245 | 2.786   |
| gi 194034274 ref XM_001924792.1 | turquoise     | 1545.9 | 1545.49 | 0.996557 | 0.000242 | 8.448   |
| gi 194034359 ref XM_001927037.1 | blue          | 301.63 | 146.492 | 0.982033 | 0.002883 | 65.002  |
| gi 194034424 ref XM_001926336.1 | darkred       | 66.416 | 7.34754 | 0.739659 | 0.153079 | 11.988  |
| gi 194034434 ref XM_001925498.1 | turquoise     | 1468.4 | 1467.71 | 0.985291 | 0.002137 | 2.852   |
| gi 194034436 ref XM_001927720.1 | turquoise     | 410.98 | 404.578 | 0.678637 | 0.207825 | 64.164  |
| gi 194034443 ref XM_001928249.1 | turquoise     | 1547.5 | 1547.14 | 0.995243 | 0.000394 | 16.81   |
| gi 194034473 ref XM_001924194.1 | turquoise     | 1267.9 | 1266.88 | 0.946537 | 0.01472  | 11.724  |
| gi 194034521 ref XM_001926126.1 | turquoise     | 1025.6 | 1022.72 | 0.899287 | 0.037783 | 48.586  |
| gi 194034626 ref XM_001929026.1 | grey          | 63.051 | 9.36151 | 0.061841 | 0.921312 | 44.412  |
| gi 194034692 ref XM_001928709.1 | turquoise     | 1198.2 | 1197.15 | 0.930685 | 0.021677 | 12.96   |
| gi 194034703 ref XM_001926714.1 | turquoise     | 293.94 | 283.178 | 0.604232 | 0.280455 | 6.914   |

|                                 |             |        |         |          |          |         |
|---------------------------------|-------------|--------|---------|----------|----------|---------|
| gi 194034713 ref XM_001925291.1 | turquoise   | 1521.6 | 1521.22 | 0.99058  | 0.001096 | 14.392  |
| gi 194034719 ref XM_001925911.1 | turquoise   | 1556.4 | 1556.07 | 0.996771 | 0.00022  | 3.202   |
| gi 194034722 ref XM_001924603.1 | turquoise   | 1443.6 | 1443.09 | 0.979606 | 0.003485 | 2.372   |
| gi 194034729 ref XM_001924943.1 | turquoise   | 1534.5 | 1534.14 | 0.993918 | 0.000569 | 52.876  |
| gi 194034776 ref XM_001928952.1 | turquoise   | 1466   | 1465.4  | 0.985205 | 0.002155 | 12.016  |
| gi 194034818 ref XM_001927452.1 | turquoise   | 451.38 | 441.175 | 0.703201 | 0.185216 | 7.334   |
| gi 194034832 ref XM_001928118.1 | turquoise   | 1508.1 | 1507.68 | 0.989036 | 0.001376 | 28.392  |
| gi 194034834 ref XM_001925793.1 | yellow      | 174.73 | 69.5232 | 0.94754  | 0.01431  | 106.26  |
| gi 194034847 ref XM_001925969.1 | turquoise   | 173.86 | 154.408 | 0.47488  | 0.418928 | 23.066  |
| gi 194034864 ref XM_001929220.1 | magenta     | 300.34 | 39.7605 | 0.969576 | 0.006341 | 25.36   |
| gi 194034892 ref XM_001929418.1 | turquoise   | 1430.5 | 1429.82 | 0.978621 | 0.00374  | 14.156  |
| gi 194034896 ref XM_001924578.1 | blue        | 330.68 | 145.599 | 0.981253 | 0.003073 | 57.344  |
| gi 194034933 ref XM_001927442.1 | turquoise   | 1459.3 | 1458.63 | 0.984023 | 0.002418 | 63.162  |
| gi 194034946 ref XM_001924579.1 | turquoise   | 595.7  | 589.17  | 0.77472  | 0.123928 | 38.052  |
| gi 194034959 ref XM_001927036.1 | turquoise   | 347.02 | 323.747 | 0.607179 | 0.277469 | 319.06  |
| gi 194034969 ref XM_001925674.1 | greenyellow | 244.42 | 18.2783 | 0.909198 | 0.032394 | 682.554 |
| gi 194034997 ref XM_001928355.1 | turquoise   | 1532.4 | 1531.95 | 0.993205 | 0.000672 | 17.406  |
| gi 194035041 ref XM_001927251.1 | turquoise   | 1450.6 | 1450.03 | 0.978225 | 0.003844 | 59.61   |
| gi 194035108 ref XM_001926680.1 | red         | 132.71 | 32.9779 | 0.895543 | 0.039886 | 24.248  |
| gi 194035136 ref XM_001924656.1 | green       | 272.27 | 48.606  | 0.955363 | 0.011245 | 52.02   |
| gi 194035178 ref XM_001925137.1 | yellow      | 230.29 | 76.258  | 0.971771 | 0.005669 | 41.71   |
| gi 194035184 ref XM_001924626.1 | turquoise   | 591.85 | 584.942 | 0.774006 | 0.124503 | 45.06   |
| gi 194035192 ref XM_001924962.1 | turquoise   | 1410.1 | 1409.24 | 0.976777 | 0.004233 | 25.788  |
| gi 194035197 ref XM_001925318.1 | turquoise   | 1191.9 | 1190.22 | 0.936381 | 0.019078 | 112.7   |
| gi 194035207 ref XM_001925835.1 | turquoise   | 1564.3 | 1563.91 | 0.998191 | 9.23E-05 | 13.586  |
| gi 194035216 ref XM_001928520.1 | lightyellow | 306.32 | 25.8033 | 0.991864 | 0.00088  | 57.412  |
| gi 194035227 ref XM_001928768.1 | turquoise   | 794.07 | 789.12  | 0.838536 | 0.075969 | 126.208 |
| gi 194035243 ref XM_001927441.1 | turquoise   | 1555.1 | 1554.65 | 0.99774  | 0.000129 | 48.55   |
| gi 194035253 ref XM_001925769.1 | turquoise   | 1297.9 | 1297.19 | 0.949852 | 0.013379 | 1.712   |
| gi 194035288 ref XM_001927095.1 | yellow      | 267.72 | 78.7735 | 0.970013 | 0.006205 | 84.276  |
| gi 194035296 ref XM_001927594.1 | turquoise   | 357.14 | 349.031 | 0.664204 | 0.221442 | 148.982 |
| gi 194035333 ref XM_001925774.1 | lightgreen  | 81.027 | 12.3635 | 0.90876  | 0.032627 | 32.802  |
| gi 194035410 ref XM_001926931.1 | turquoise   | 1516.8 | 1516.25 | 0.991927 | 0.00087  | 4.766   |
| gi 194035412 ref XM_001925476.1 | turquoise   | 1534.1 | 1533.7  | 0.993225 | 0.000669 | 22.126  |
| gi 194035414 ref XM_001925502.1 | turquoise   | 1392.7 | 1392.14 | 0.96833  | 0.006733 | 13.306  |
| gi 194035424 ref XM_001926628.1 | turquoise   | 674    | 669.607 | 0.800289 | 0.103867 | 30.536  |
| gi 194035434 ref XM_001926912.1 | turquoise   | 1282.3 | 1281.49 | 0.947001 | 0.01453  | 6.586   |
| gi 194035451 ref XM_001928072.1 | turquoise   | 1517   | 1516.49 | 0.992745 | 0.000741 | 17.79   |
| gi 194035475 ref XM_001924744.1 | turquoise   | 1484.9 | 1484.45 | 0.983794 | 0.00247  | 6.326   |
| gi 194035479 ref XM_001924978.1 | turquoise   | 1538.4 | 1538.01 | 0.993822 | 0.000582 | 9.712   |
| gi 194035517 ref XM_001925462.1 | turquoise   | 1160.7 | 1158.98 | 0.932045 | 0.021047 | 46      |
| gi 194035561 ref XM_001924535.1 | turquoise   | 1355.2 | 1354.14 | 0.966234 | 0.00741  | 32.684  |
| gi 194035566 ref XM_001925085.1 | turquoise   | 367.23 | 364.533 | 0.684552 | 0.202314 | 1.92    |
| gi 194035578 ref XM_001928185.1 | turquoise   | 123.35 | 93.8958 | 0.350117 | 0.563501 | 4.064   |
| gi 194035588 ref XM_001924955.1 | turquoise   | 1075.2 | 1073.07 | 0.91444  | 0.029654 | 35.426  |
| gi 194035600 ref XM_001927804.1 | pink        | 183.63 | 38.7932 | 0.95279  | 0.012226 | 136.806 |
| gi 194035607 ref XM_001928505.1 | turquoise   | 1476.3 | 1475.71 | 0.987546 | 0.001665 | 78.814  |
| gi 194035627 ref XM_001924280.1 | salmon      | 96.334 | 18.2177 | 0.862982 | 0.059616 | 26.326  |

|                                 |              |        |         |          |          |         |
|---------------------------------|--------------|--------|---------|----------|----------|---------|
| gi 194035631 ref XM_001924325.1 | turquoise    | 1546.9 | 1546.45 | 0.997262 | 0.000172 | 82.598  |
| gi 194035643 ref XM_001927050.1 | turquoise    | 504.21 | 499.344 | 0.75404  | 0.140903 | 100.666 |
| gi 194035657 ref XM_001928441.1 | turquoise    | 1091.9 | 1090.21 | 0.910194 | 0.031868 | 52.744  |
| gi 194035679 ref XM_001925389.1 | turquoise    | 821.68 | 818.688 | 0.841426 | 0.073973 | 441.622 |
| gi 194035708 ref XM_001927062.1 | turquoise    | 1532.3 | 1531.82 | 0.994928 | 0.000433 | 18.184  |
| gi 194035716 ref XM_001925987.1 | turquoise    | 1310.1 | 1309.06 | 0.955228 | 0.011295 | 18.55   |
| gi 194035722 ref XM_001926997.1 | turquoise    | 1360.7 | 1359.93 | 0.968888 | 0.006557 | 47.808  |
| gi 194035737 ref XM_001928295.1 | brown        | 261.96 | 117.791 | 0.971449 | 0.005766 | 104.47  |
| gi 194035753 ref XM_001927135.1 | turquoise    | 1567.1 | 1566.69 | 0.999496 | 1.36E-05 | 53.61   |
| gi 194035832 ref XM_001928786.1 | turquoise    | 249.81 | 238.458 | 0.575555 | 0.309936 | 42.056  |
| gi 194035836 ref XM_001928869.1 | turquoise    | 1343.5 | 1342.82 | 0.960077 | 0.009518 | 55.688  |
| gi 194035846 ref XM_001928960.1 | blue         | 323.34 | 151.525 | 0.989641 | 0.001264 | 106.852 |
| gi 194035848 ref XM_001928966.1 | red          | 178.14 | 47.2082 | 0.974381 | 0.004903 | 43.322  |
| gi 194035852 ref XM_001929031.1 | turquoise    | 403    | 395.549 | 0.671249 | 0.214765 | 3.046   |
| gi 194035880 ref XM_001929177.1 | turquoise    | 1490.6 | 1490.24 | 0.986431 | 0.001894 | 1.636   |
| gi 194035984 ref XM_001925466.1 | turquoise    | 298.34 | 277.527 | 0.578775 | 0.306588 | 105.11  |
| gi 194036005 ref XM_001926377.1 | turquoise    | 208.57 | 150.906 | 0.388279 | 0.518347 | 133.048 |
| gi 194036030 ref XM_001928495.1 | turquoise    | 146.32 | 96.9727 | 0.328297 | 0.589634 | 66.226  |
| gi 194036038 ref XM_001928648.1 | blue         | 326.95 | 142.834 | 0.977239 | 0.004108 | 26.67   |
| gi 194036052 ref XM_001926689.1 | turquoise    | 1556.9 | 1556.47 | 0.996831 | 0.000214 | 1.79    |
| gi 194036068 ref XM_001926844.1 | turquoise    | 135.22 | 112.638 | 0.416439 | 0.485525 | 49.156  |
| gi 194036099 ref XM_001929400.1 | turquoise    | 1356.3 | 1355.77 | 0.965717 | 0.007581 | 21.056  |
| gi 194036101 ref XM_001929371.1 | turquoise    | 165.21 | 115.557 | 0.363922 | 0.547081 | 32.786  |
| gi 194036118 ref XM_001927231.1 | brown        | 149.49 | 86.6583 | 0.90679  | 0.033679 | 24.636  |
| gi 194036122 ref XM_001929505.1 | turquoise    | 1529.5 | 1529.09 | 0.993155 | 0.000679 | 9.154   |
| gi 194036140 ref XM_001929572.1 | blue         | 340.87 | 135.456 | 0.965439 | 0.007673 | 17.206  |
| gi 194036211 ref XM_001927870.1 | turquoise    | 1357   | 1356.51 | 0.966673 | 0.007267 | 2.084   |
| gi 194036224 ref XM_001929641.1 | blue         | 308.42 | 150.293 | 0.988071 | 0.001561 | 75.73   |
| gi 194036252 ref XM_001929660.1 | green        | 190.46 | 51.7022 | 0.989103 | 0.001363 | 41.324  |
| gi 194036256 ref XM_001929662.1 | turquoise    | 1258.5 | 1257.16 | 0.949181 | 0.013647 | 3.964   |
| gi 194036270 ref XM_001929667.1 | turquoise    | 1055.2 | 1053.24 | 0.908126 | 0.032964 | 44.224  |
| gi 194036282 ref XM_001924669.1 | brown        | 214.49 | 118.564 | 0.981315 | 0.003057 | 14.186  |
| gi 194036295 ref XM_001926489.1 | turquoise    | 1386.2 | 1385.27 | 0.969746 | 0.006288 | 28.862  |
| gi 194036309 ref XM_001927637.1 | navy         | 226.5  | 25.1436 | 0.928774 | 0.022574 | 148.8   |
| gi 194036317 ref XM_001927969.1 | turquoise    | 1523.7 | 1523.3  | 0.993635 | 0.000609 | 14.874  |
| gi 194036348 ref XM_001928686.1 | turquoise    | 1428.4 | 1427.85 | 0.979359 | 0.003549 | 28.404  |
| gi 194036350 ref XM_001926399.1 | turquoise    | 1415.5 | 1414.76 | 0.97379  | 0.005074 | 5.294   |
| gi 194036374 ref XM_001929178.1 | turquoise    | 1550.4 | 1549.91 | 0.997641 | 0.000137 | 19.842  |
| gi 194036390 ref XM_001929343.1 | turquoise    | 154.35 | 94.3974 | 0.327866 | 0.590153 | 45.53   |
| gi 194036392 ref XM_001929357.1 | turquoise    | 1469.2 | 1468.57 | 0.985197 | 0.002157 | 3.68    |
| gi 194036406 ref XM_001927918.1 | midnightblue | 202.83 | 34.7267 | 0.9856   | 0.00207  | 18.838  |
| gi 194036414 ref XM_001927979.1 | turquoise    | 128.02 | 103.814 | 0.390373 | 0.515891 | 20.658  |
| gi 194036424 ref XM_001925710.1 | turquoise    | 132.79 | 69.0372 | 0.269129 | 0.661517 | 39.102  |
| gi 194036434 ref XM_001926977.1 | turquoise    | 684.81 | 677.457 | 0.798743 | 0.10505  | 174.104 |
| gi 194036442 ref XM_001925127.1 | turquoise    | 1560.4 | 1560.02 | 0.998171 | 9.39E-05 | 41.262  |
| gi 194036460 ref XM_001926279.1 | magenta      | 342.24 | 41.3432 | 0.975646 | 0.004546 | 27.508  |
| gi 194036467 ref XM_001928805.1 | turquoise    | 191.66 | 114.846 | 0.317149 | 0.603069 | 42.36   |
| gi 194036601 ref XM_001929330.1 | turquoise    | 1272.4 | 1271.62 | 0.945726 | 0.015054 | 11.784  |

|                                 |              |        |         |          |          |         |
|---------------------------------|--------------|--------|---------|----------|----------|---------|
| gi 194036603 ref XM_001929372.1 | turquoise    | 912.38 | 908.645 | 0.872223 | 0.053766 | 459.4   |
| gi 194036611 ref XM_001926603.1 | turquoise    | 1561.5 | 1561.16 | 0.998016 | 0.000106 | 28.062  |
| gi 194036619 ref XM_001927496.1 | turquoise    | 1423.2 | 1422.58 | 0.976076 | 0.004426 | 17.404  |
| gi 194036621 ref XM_001927321.1 | turquoise    | 824.58 | 822.333 | 0.839214 | 0.0755   | 70.158  |
| gi 194036623 ref XM_001927665.1 | turquoise    | 524.09 | 518.759 | 0.733132 | 0.158701 | 22.086  |
| gi 194036639 ref XM_001924618.1 | brown        | 228    | 123.01  | 0.986531 | 0.001873 | 128.9   |
| gi 194036658 ref XM_001926004.1 | turquoise    | 1449.7 | 1448.99 | 0.982297 | 0.00282  | 24.204  |
| gi 194036687 ref XM_001926116.1 | midnightblue | 258.65 | 33.5788 | 0.977934 | 0.003922 | 49.27   |
| gi 194036698 ref XM_001928463.1 | turquoise    | 420.08 | 411.348 | 0.696158 | 0.191623 | 13.646  |
| gi 194036737 ref XM_001927243.1 | royalblue    | 258.08 | 21.0613 | 0.943513 | 0.015979 | 61.28   |
| gi 194036739 ref XM_001927255.1 | turquoise    | 1506.7 | 1506.27 | 0.987934 | 0.001588 | 30.982  |
| gi 194036762 ref XM_001925928.1 | darkgreen    | 323.97 | 21.2657 | 0.978329 | 0.003817 | 22.746  |
| gi 194036768 ref XM_001927459.1 | turquoise    | 1537.3 | 1536.91 | 0.993063 | 0.000693 | 5.244   |
| gi 194036772 ref XM_001927760.1 | turquoise    | 1112   | 1110.35 | 0.919214 | 0.027227 | 21.606  |
| gi 194036795 ref XM_001926863.1 | yellow       | 310.35 | 63.6789 | 0.903876 | 0.035255 | 17.26   |
| gi 194036805 ref XM_001928924.1 | red          | 232.3  | 50.1842 | 0.987955 | 0.001584 | 22.378  |
| gi 194036851 ref XM_001928643.1 | turquoise    | 1404.2 | 1403.27 | 0.975042 | 0.004715 | 47.666  |
| gi 194036879 ref XM_001927666.1 | green        | 108.61 | 15.9611 | 0.673886 | 0.21228  | 57.728  |
| gi 194036901 ref XM_001927323.1 | black        | 145.76 | 18.7926 | 0.775465 | 0.123329 | 88.024  |
| gi 194036903 ref XM_001927877.1 | turquoise    | 333.74 | 329.423 | 0.674387 | 0.211809 | 2.126   |
| gi 194036925 ref XM_001925464.1 | turquoise    | 1533.5 | 1533.16 | 0.993369 | 0.000648 | 6.47    |
| gi 194036941 ref XM_001925986.1 | lightgreen   | 89.422 | 9.77882 | 0.845316 | 0.071311 | 15.712  |
| gi 194036956 ref XM_001924342.1 | turquoise    | 1476.9 | 1476.41 | 0.987183 | 0.001738 | 29.376  |
| gi 194036972 ref XM_001927228.1 | turquoise    | 1304.4 | 1303.17 | 0.956606 | 0.01078  | 210.808 |
| gi 194036974 ref XM_001927747.1 | turquoise    | 901.24 | 897.093 | 0.86782  | 0.05653  | 438.702 |
| gi 194036992 ref XM_001928798.1 | tan          | 272.34 | 37.3475 | 0.97725  | 0.004105 | 17.398  |
| gi 194037004 ref XM_001928953.1 | turquoise    | 1553.3 | 1552.86 | 0.997031 | 0.000194 | 15.404  |
| gi 194037019 ref XM_001926939.1 | lightcyan    | 152.07 | 6.9697  | 0.174481 | 0.778977 | 14.772  |
| gi 194037021 ref XM_001926975.1 | turquoise    | 1560.1 | 1559.69 | 0.998916 | 4.29E-05 | 2.618   |
| gi 194037031 ref XM_001925224.1 | turquoise    | 337.54 | 328.649 | 0.625619 | 0.258982 | 3.954   |
| gi 194037039 ref XM_001926976.1 | turquoise    | 1372.2 | 1371.44 | 0.966785 | 0.00723  | 18.666  |
| gi 194037065 ref XM_001927928.1 | brown        | 204.79 | 100.201 | 0.943371 | 0.016038 | 26.412  |
| gi 194037139 ref XM_001925875.1 | yellow       | 131.71 | 58.5827 | 0.897157 | 0.038974 | 55.446  |
| gi 194037164 ref XM_001928669.1 | turquoise    | 872.46 | 867.679 | 0.858715 | 0.062381 | 1.148   |
| gi 194037172 ref XM_001928663.1 | grey60       | 290.16 | 27.5748 | 0.95702  | 0.010627 | 68.298  |
| gi 194037185 ref XM_001929112.1 | purple       | 163.93 | 26.1381 | 0.915152 | 0.029288 | 23.798  |
| gi 194037272 ref XM_001928278.1 | turquoise    | 978.58 | 976.133 | 0.894194 | 0.040652 | 20.91   |
| gi 194037329 ref XM_001927218.1 | blue         | 209.51 | 73.9714 | 0.830171 | 0.081841 | 2.41    |
| gi 194037339 ref XM_001924386.1 | turquoise    | 1512.3 | 1511.93 | 0.98989  | 0.001218 | 4.304   |
| gi 194037346 ref XM_001924466.1 | lightcyan    | 281.13 | 26.1543 | 0.97996  | 0.003395 | 35.654  |
| gi 194037354 ref XM_001926198.1 | brown        | 280.46 | 102.4   | 0.930092 | 0.021954 | 42.51   |
| gi 194037369 ref XM_001925128.1 | turquoise    | 1374.1 | 1373.22 | 0.970491 | 0.006058 | 28.926  |
| gi 194037372 ref XM_001927549.1 | darkred      | 75.722 | 9.17114 | 0.804243 | 0.100862 | 63.18   |
| gi 194037379 ref XM_001925252.1 | turquoise    | 1431   | 1430.21 | 0.980043 | 0.003374 | 58.612  |
| gi 194037499 ref XM_001928879.1 | yellow       | 218.12 | 78.9129 | 0.979973 | 0.003392 | 47.322  |
| gi 194037532 ref XM_001929272.1 | red          | 210.71 | 49.7557 | 0.986543 | 0.00187  | 19.288  |
| gi 194037543 ref XM_001929293.1 | turquoise    | 340.67 | 331.757 | 0.650252 | 0.234831 | 66.758  |
| gi 194037553 ref XM_001929410.1 | navy         | 279.37 | 30.6783 | 0.970964 | 0.005913 | 518.492 |



|                                 |               |        |         |          |          |         |
|---------------------------------|---------------|--------|---------|----------|----------|---------|
| gi 194037555 ref XM_001929413.1 | blue          | 235.99 | 94.1658 | 0.882019 | 0.047776 | 63.236  |
| gi 194037603 ref XM_001927821.1 | turquoise     | 1453   | 1452.44 | 0.981624 | 0.002982 | 61.668  |
| gi 194037611 ref XM_001925424.1 | tan           | 285.18 | 37.8254 | 0.982123 | 0.002862 | 31.746  |
| gi 194037617 ref XM_001927127.1 | turquoise     | 1503.6 | 1503.21 | 0.987967 | 0.001582 | 35.976  |
| gi 194037661 ref XM_001928816.1 | turquoise     | 1453.8 | 1453.32 | 0.978816 | 0.003689 | 2.236   |
| gi 194037682 ref XM_001927000.1 | turquoise     | 1114.7 | 1112.4  | 0.919573 | 0.027048 | 79.74   |
| gi 194037684 ref XM_001927128.1 | darkturquoise | 177.15 | 15.5682 | 0.964017 | 0.008149 | 83.722  |
| gi 194037687 ref XM_001927351.1 | turquoise     | 1552.3 | 1551.92 | 0.99639  | 0.00026  | 20.116  |
| gi 194037705 ref XM_001924362.1 | purple        | 171.03 | 27.9094 | 0.93617  | 0.019172 | 102.164 |
| gi 194037707 ref XM_001924251.1 | salmon        | 143.02 | 26.0806 | 0.948957 | 0.013737 | 11.932  |
| gi 194037715 ref XM_001927280.1 | turquoise     | 320.4  | 291.567 | 0.578977 | 0.306378 | 34.562  |
| gi 194037750 ref XM_001926886.1 | turquoise     | 1542.6 | 1542.18 | 0.994826 | 0.000446 | 2.518   |
| gi 194037755 ref XM_001925059.1 | brown         | 160.03 | 87.0876 | 0.904708 | 0.034803 | 13.32   |
| gi 194037785 ref XM_001924937.1 | turquoise     | 102.9  | 58.6365 | 0.228991 | 0.711008 | 3.172   |
| gi 194037857 ref XM_001927835.1 | turquoise     | 1560.7 | 1560.23 | 0.998822 | 4.85E-05 | 13.228  |
| gi 194037865 ref XM_001928013.1 | turquoise     | 1442.9 | 1442.13 | 0.982227 | 0.002837 | 88.838  |
| gi 194037874 ref XM_001925758.1 | turquoise     | 1453.7 | 1453.04 | 0.982626 | 0.002742 | 5.614   |
| gi 194037879 ref XM_001925784.1 | turquoise     | 1253.3 | 1252.28 | 0.948205 | 0.01404  | 22.676  |
| gi 194037909 ref XM_001924188.1 | turquoise     | 1447.1 | 1446.4  | 0.980947 | 0.003148 | 3.072   |
| gi 194037914 ref XM_001927045.1 | turquoise     | 1553.6 | 1553.18 | 0.996528 | 0.000245 | 0.756   |
| gi 194037944 ref XM_001924408.1 | turquoise     | 822.52 | 818.829 | 0.84809  | 0.069432 | 18.472  |
| gi 194037952 ref XM_001924515.1 | black         | 274.25 | 40.8838 | 0.992296 | 0.000811 | 136.058 |
| gi 194038017 ref XM_001928309.1 | tan           | 224.06 | 28.2182 | 0.915916 | 0.028897 | 17.818  |
| gi 194038023 ref XM_001928502.1 | turquoise     | 797.98 | 791.981 | 0.835975 | 0.077753 | 35.3    |
| gi 194038031 ref XM_001928655.1 | turquoise     | 1482.6 | 1482.1  | 0.987633 | 0.001648 | 8.358   |
| gi 194038037 ref XM_001929120.1 | green         | 279.64 | 42.8609 | 0.917222 | 0.028232 | 33.068  |
| gi 194038066 ref XM_001927909.1 | turquoise     | 1354.8 | 1353.98 | 0.966406 | 0.007354 | 266.846 |
| gi 194038088 ref XM_001925288.1 | turquoise     | 1454.9 | 1454.26 | 0.983455 | 0.002548 | 37.936  |
| gi 194038212 ref XM_001927641.1 | turquoise     | 1481   | 1480.63 | 0.983526 | 0.002532 | 11.734  |
| gi 194038223 ref XM_001926312.1 | turquoise     | 1239.1 | 1237.78 | 0.9448   | 0.015439 | 3.568   |
| gi 194038225 ref XM_001926546.1 | turquoise     | 161.08 | 134.98  | 0.424117 | 0.476653 | 55.254  |
| gi 194038241 ref XM_001927985.1 | turquoise     | 336.19 | 321.41  | 0.641716 | 0.243127 | 42.514  |
| gi 194038245 ref XM_001928187.1 | turquoise     | 1517.2 | 1516.82 | 0.990742 | 0.001068 | 90.006  |
| gi 194038277 ref XM_001926890.1 | turquoise     | 1390.1 | 1389.2  | 0.972101 | 0.005571 | 40.91   |
| gi 194038313 ref XM_001925341.1 | midnightblue  | 226.63 | 36.6195 | 0.996692 | 0.000228 | 12.226  |
| gi 194038369 ref XM_001929075.1 | turquoise     | 1408.8 | 1407.92 | 0.975025 | 0.00472  | 98.692  |
| gi 194038424 ref XM_001926793.1 | turquoise     | 465.88 | 457.532 | 0.721143 | 0.16918  | 46.082  |
| gi 194038454 ref XM_001928679.1 | turquoise     | 1413.7 | 1412.98 | 0.976989 | 0.004176 | 7.408   |
| gi 194038456 ref XM_001928767.1 | turquoise     | 672.54 | 666.136 | 0.79893  | 0.104906 | 26.262  |
| gi 194038464 ref XM_001924308.1 | pink          | 284.23 | 38.8364 | 0.944387 | 0.015611 | 788.818 |
| gi 194038478 ref XM_001926160.1 | darkturquoise | 198.48 | 17.1627 | 0.974723 | 0.004806 | 26.24   |
| gi 194038523 ref XM_001928961.1 | turquoise     | 1069.9 | 1068.3  | 0.916463 | 0.028617 | 8.702   |
| gi 194038579 ref XM_001926122.1 | salmon        | 247.03 | 27.4062 | 0.952078 | 0.012502 | 70.04   |
| gi 194038585 ref XM_001926711.1 | turquoise     | 1474.5 | 1474.02 | 0.982406 | 0.002794 | 329.424 |
| gi 194038687 ref XM_001928174.1 | turquoise     | 1415.2 | 1414.42 | 0.977045 | 0.00416  | 42.76   |
| gi 194038695 ref XM_001928512.1 | turquoise     | 1452.9 | 1452.31 | 0.983122 | 0.002625 | 27.482  |
| gi 194038708 ref XM_001928665.1 | turquoise     | 1468.8 | 1468.45 | 0.983346 | 0.002573 | 162.876 |
| gi 194038714 ref XM_001926092.1 | turquoise     | 1376.3 | 1375.72 | 0.965735 | 0.007575 | 42.136  |

|                                 |               |        |         |          |          |         |
|---------------------------------|---------------|--------|---------|----------|----------|---------|
| gi 194038719 ref XM_001926310.1 | turquoise     | 1379.3 | 1378.39 | 0.969774 | 0.006279 | 17.04   |
| gi 194038723 ref XM_001929103.1 | yellow        | 162.61 | 58.3695 | 0.887051 | 0.044788 | 23.262  |
| gi 194038735 ref XM_001929188.1 | turquoise     | 394.78 | 375.907 | 0.656354 | 0.228949 | 41.952  |
| gi 194038777 ref XM_001928268.1 | turquoise     | 1252.1 | 1250.69 | 0.946942 | 0.014554 | 40.234  |
| gi 194038781 ref XM_001926473.1 | turquoise     | 1313.7 | 1312.53 | 0.957275 | 0.010533 | 103.76  |
| gi 194038818 ref XM_001924413.1 | turquoise     | 142.42 | 120.168 | 0.407708 | 0.495653 | 11.748  |
| gi 194038838 ref XM_001927354.1 | turquoise     | 1483.3 | 1482.67 | 0.988149 | 0.001546 | 22.394  |
| gi 194038854 ref XM_001928014.1 | salmon        | 136.78 | 23.7297 | 0.937297 | 0.01867  | 88.614  |
| gi 194038889 ref XM_001928918.1 | turquoise     | 1461.6 | 1460.85 | 0.9841   | 0.002401 | 18.144  |
| gi 194038900 ref XM_001925133.1 | blue          | 345.98 | 149.203 | 0.985794 | 0.002028 | 66.896  |
| gi 194038904 ref XM_001924445.1 | turquoise     | 150.36 | 123.342 | 0.400677 | 0.503841 | 181.856 |
| gi 194038910 ref XM_001926121.1 | blue          | 331.81 | 145.339 | 0.979939 | 0.003401 | 22.85   |
| gi 194039226 ref XM_001928899.1 | pink          | 265.18 | 45.3112 | 0.982642 | 0.002738 | 270.856 |
| gi 194039262 ref XM_001927034.1 | darkturquoise | 181.96 | 7.73013 | 0.793601 | 0.109011 | 2.71    |
| gi 194039264 ref XM_001927148.1 | green         | 217.56 | 48.4686 | 0.949582 | 0.013487 | 17.42   |
| gi 194039314 ref XM_001926691.1 | turquoise     | 1465.8 | 1465.29 | 0.984622 | 0.002284 | 11.208  |
| gi 194039316 ref XM_001929265.1 | grey          | 62.985 | 9.48272 | -0.0116  | 0.985229 | 76.966  |
| gi 194039388 ref XM_001929568.1 | turquoise     | 442.99 | 439.877 | 0.724945 | 0.165836 | 33.518  |
| gi 194039390 ref XM_001929570.1 | purple        | 185.48 | 32.5238 | 0.97398  | 0.005019 | 646.798 |
| gi 194039486 ref XM_001927002.1 | turquoise     | 281.8  | 245.238 | 0.53302  | 0.355005 | 58.212  |
| gi 194039490 ref XM_001927338.1 | red           | 223.67 | 48.452  | 0.980237 | 0.003325 | 65.578  |
| gi 194039500 ref XM_001925226.1 | turquoise     | 1156.5 | 1154.73 | 0.930717 | 0.021662 | 22.902  |
| gi 194039546 ref XM_001928863.1 | turquoise     | 1016.8 | 1015.21 | 0.906623 | 0.033769 | 74.624  |
| gi 194039563 ref XM_001929079.1 | turquoise     | 692.7  | 684.854 | 0.800188 | 0.103945 | 12.566  |
| gi 194039565 ref XM_001929124.1 | turquoise     | 1263.5 | 1262.32 | 0.949238 | 0.013624 | 32.994  |
| gi 194039587 ref XM_001929390.1 | lightyellow   | 308.74 | 26.2161 | 0.999961 | 2.94E-07 | 57.702  |
| gi 194039625 ref XM_001925622.1 | turquoise     | 1530.7 | 1530.27 | 0.994404 | 0.000502 | 9.53    |
| gi 194039679 ref XM_001928732.1 | turquoise     | 948.93 | 947.439 | 0.882218 | 0.047657 | 65.554  |
| gi 194039687 ref XM_001928955.1 | turquoise     | 1310.5 | 1309.38 | 0.960769 | 0.009273 | 107.684 |
| gi 194039697 ref XM_001929172.1 | turquoise     | 1072.8 | 1070.85 | 0.913374 | 0.030205 | 98.12   |
| gi 194039709 ref XM_001929236.1 | lightyellow   | 286.12 | 24.2829 | 0.970525 | 0.006048 | 63.436  |
| gi 194039715 ref XM_001925448.1 | turquoise     | 1249.2 | 1248.66 | 0.949775 | 0.01341  | 54.768  |
| gi 194039719 ref XM_001927905.1 | turquoise     | 1513.8 | 1513.27 | 0.989473 | 0.001295 | 1.086   |
| gi 194039733 ref XM_001928398.1 | turquoise     | 1549.3 | 1548.86 | 0.995759 | 0.000331 | 9.8     |
| gi 194039735 ref XM_001928389.1 | pink          | 243.83 | 44.1166 | 0.980234 | 0.003326 | 403.634 |
| gi 194040165 ref XM_001929121.1 | turquoise     | 1553.6 | 1553.18 | 0.996528 | 0.000245 | 0.566   |
| gi 194040173 ref XM_001926225.1 | darkred       | 53.323 | 11.4122 | 0.90153  | 0.03654  | 92.802  |
| gi 194040238 ref XM_001929612.1 | turquoise     | 248.85 | 230.737 | 0.55148  | 0.335257 | 20.88   |
| gi 194040263 ref XM_001927880.1 | yellow        | 153.69 | 64.9252 | 0.930365 | 0.021827 | 21.814  |
| gi 194040280 ref XM_001925339.1 | lightgreen    | 110.49 | 7.86981 | 0.49707  | 0.394237 | 317.058 |
| gi 194040290 ref XM_001927693.1 | turquoise     | 195.33 | 185.586 | 0.554276 | 0.33229  | 34.68   |
| gi 194040321 ref XM_001928400.1 | turquoise     | 501.15 | 494.909 | 0.743263 | 0.15     | 39.014  |
| gi 194040341 ref XM_001928820.1 | turquoise     | 1433.9 | 1433.15 | 0.978465 | 0.003781 | 25.034  |
| gi 194040347 ref XM_001926869.1 | turquoise     | 1553.6 | 1553.18 | 0.996528 | 0.000245 | 2.362   |
| gi 194040411 ref XM_001929558.1 | yellow        | 228.6  | 69.0828 | 0.943761 | 0.015874 | 253.72  |
| gi 194040422 ref XM_001929580.1 | turquoise     | 1276.3 | 1274.99 | 0.951792 | 0.012614 | 168.67  |
| gi 194040485 ref XM_001926913.1 | blue          | 345.11 | 146.688 | 0.98223  | 0.002836 | 81.41   |
| gi 194040487 ref XM_001926988.1 | blue          | 267.85 | 125.894 | 0.947974 | 0.014134 | 25.006  |

|                                 |              |        |         |          |          |          |
|---------------------------------|--------------|--------|---------|----------|----------|----------|
| gi 194040489 ref XM_001927223.1 | turquoise    | 124.83 | 99.0196 | 0.373015 | 0.536319 | 62.712   |
| gi 194040496 ref XM_001928226.1 | royalblue    | 254.17 | 21.7245 | 0.952157 | 0.012472 | 31.392   |
| gi 194040558 ref XM_001928742.1 | turquoise    | 155.51 | 137.738 | 0.463475 | 0.431751 | 1849.176 |
| gi 194040597 ref XM_001928150.1 | turquoise    | 180.6  | 156.44  | 0.455162 | 0.441153 | 29.566   |
| gi 194040616 ref XM_001929023.1 | red          | 131.7  | 34.5756 | 0.903406 | 0.035511 | 56.558   |
| gi 194040672 ref XM_001925213.1 | turquoise    | 1507.5 | 1507.11 | 0.989209 | 0.001343 | 1.554    |
| gi 194040677 ref XM_001927466.1 | turquoise    | 1546   | 1545.53 | 0.996281 | 0.000272 | 68.772   |
| gi 194040689 ref XM_001927163.1 | turquoise    | 1353.5 | 1352.99 | 0.962729 | 0.008589 | 6.104    |
| gi 194040706 ref XM_001927201.1 | magenta      | 346.29 | 42.0484 | 0.981411 | 0.003034 | 320.558  |
| gi 194040741 ref XM_001926132.1 | turquoise    | 1293.3 | 1292.03 | 0.956097 | 0.01097  | 22.546   |
| gi 194040755 ref XM_001927097.1 | navy         | 160.77 | 14.7628 | 0.818286 | 0.090409 | 157.49   |
| gi 194040778 ref XM_001927213.1 | turquoise    | 1294.5 | 1293.83 | 0.953462 | 0.011967 | 23.146   |
| gi 194040784 ref XM_001927731.1 | turquoise    | 1384.3 | 1383.63 | 0.970317 | 0.006112 | 17.252   |
| gi 194040788 ref XM_001925300.1 | turquoise    | 1499.8 | 1499.31 | 0.98737  | 0.001701 | 30.228   |
| gi 194040884 ref XM_001924115.1 | turquoise    | 1350.4 | 1349.86 | 0.960958 | 0.009206 | 2.704    |
| gi 194040931 ref XM_001926443.1 | turquoise    | 1552.9 | 1552.51 | 0.996426 | 0.000256 | 20.412   |
| gi 194040939 ref XM_001924716.1 | turquoise    | 1069.2 | 1068.01 | 0.903272 | 0.035584 | 43.148   |
| gi 194040961 ref XM_001924920.1 | turquoise    | 1244.4 | 1243.08 | 0.948534 | 0.013907 | 26.612   |
| gi 194040969 ref XM_001924529.1 | turquoise    | 1216.3 | 1215.34 | 0.933446 | 0.020404 | 39.874   |
| gi 194040977 ref XM_001927185.1 | brown        | 118.06 | 56.8007 | 0.797428 | 0.106059 | 22.626   |
| gi 194040979 ref XM_001928486.1 | black        | 286.16 | 42.7344 | 0.99713  | 0.000184 | 209.536  |
| gi 194040991 ref XM_001924397.1 | lightgreen   | 60.994 | 7.71751 | 0.82884  | 0.082787 | 7.568    |
| gi 194041001 ref XM_001924658.1 | brown        | 134.72 | 65.4409 | 0.845385 | 0.071265 | 6.894    |
| gi 194041007 ref XM_001926441.1 | yellow       | 266.88 | 63.3477 | 0.902757 | 0.035866 | 96.424   |
| gi 194041032 ref XM_001925741.1 | turquoise    | 364.4  | 347.437 | 0.643294 | 0.241588 | 59.64    |
| gi 194041034 ref XM_001928236.1 | turquoise    | 1210.9 | 1210.19 | 0.938947 | 0.017942 | 9.588    |
| gi 194041036 ref XM_001925819.1 | turquoise    | 1262.8 | 1262.22 | 0.945536 | 0.015133 | 59.44    |
| gi 194041065 ref XM_001928989.1 | turquoise    | 1384.3 | 1383.4  | 0.971374 | 0.005789 | 45.538   |
| gi 194041087 ref XM_001927225.1 | greenyellow  | 213.19 | 22.3512 | 0.991227 | 0.000985 | 36.108   |
| gi 194041134 ref XM_001928893.1 | turquoise    | 1493.8 | 1493.3  | 0.987318 | 0.001711 | 4.07     |
| gi 194041160 ref XM_001927391.1 | turquoise    | 1563.1 | 1562.75 | 0.998713 | 5.54E-05 | 6.584    |
| gi 194041162 ref XM_001927505.1 | turquoise    | 1506   | 1505.4  | 0.99139  | 0.000958 | 28.962   |
| gi 194041182 ref XM_001924270.1 | turquoise    | 1516.8 | 1516.41 | 0.990409 | 0.001126 | 7.634    |
| gi 194041219 ref XM_001928126.1 | turquoise    | 1071.9 | 1070.38 | 0.906052 | 0.034076 | 11.922   |
| gi 194041222 ref XM_001925236.1 | turquoise    | 1524.6 | 1524.04 | 0.994282 | 0.000519 | 5.032    |
| gi 194041230 ref XM_001925354.1 | turquoise    | 1311.8 | 1310.65 | 0.960031 | 0.009535 | 54.018   |
| gi 194041234 ref XM_001925415.1 | turquoise    | 1267.6 | 1266.95 | 0.953031 | 0.012133 | 21.048   |
| gi 194041270 ref XM_001926989.1 | turquoise    | 1491.8 | 1491.27 | 0.987335 | 0.001708 | 11.7     |
| gi 194041303 ref XM_001927800.1 | turquoise    | 449.51 | 433.081 | 0.683567 | 0.203228 | 39.422   |
| gi 194041305 ref XM_001927960.1 | pink         | 218.95 | 46.5206 | 0.992287 | 0.000812 | 38.65    |
| gi 194041319 ref XM_001928397.1 | turquoise    | 942.15 | 939.542 | 0.885414 | 0.045753 | 25.722   |
| gi 194041329 ref XM_001928735.1 | turquoise    | 1427.4 | 1426.84 | 0.974314 | 0.004923 | 3.3      |
| gi 194041357 ref XM_001926917.1 | midnightblue | 193.89 | 33.7288 | 0.979207 | 0.003588 | 108.794  |
| gi 194041366 ref XM_001924481.1 | turquoise    | 1481.5 | 1480.87 | 0.987394 | 0.001696 | 40.798   |
| gi 194041397 ref XM_001928870.1 | turquoise    | 216.98 | 162.331 | 0.408774 | 0.494415 | 16.516   |
| gi 194041401 ref XM_001926294.1 | turquoise    | 1565   | 1564.6  | 0.998931 | 4.20E-05 | 3.062    |
| gi 194041408 ref XM_001929007.1 | turquoise    | 1530.6 | 1530.09 | 0.994774 | 0.000453 | 5.338    |
| gi 194041423 ref XM_001926755.1 | turquoise    | 1268   | 1266.79 | 0.947799 | 0.014204 | 48.486   |

|                                 |              |        |         |          |          |         |
|---------------------------------|--------------|--------|---------|----------|----------|---------|
| gi 194041507 ref XM_001924700.1 | turquoise    | 1560.1 | 1559.76 | 0.997921 | 0.000114 | 20.418  |
| gi 194041520 ref XM_001927592.1 | turquoise    | 1542   | 1541.53 | 0.996417 | 0.000257 | 84.21   |
| gi 194041588 ref XM_001927189.1 | turquoise    | 1514.3 | 1513.94 | 0.989873 | 0.001221 | 10.972  |
| gi 194041609 ref XM_001928028.1 | turquoise    | 1527.7 | 1527.21 | 0.994278 | 0.000519 | 56.202  |
| gi 194041636 ref XM_001929009.1 | turquoise    | 1186.2 | 1184.69 | 0.932136 | 0.021005 | 45.61   |
| gi 194041638 ref XM_001929068.1 | salmon       | 100.93 | 22.7425 | 0.917231 | 0.028227 | 49.698  |
| gi 194041706 ref XM_001926955.1 | turquoise    | 1553.6 | 1553.18 | 0.996528 | 0.000245 | 0.52    |
| gi 194041741 ref XM_001928824.1 | turquoise    | 606.17 | 600.04  | 0.784295 | 0.116292 | 6.236   |
| gi 194041747 ref XM_001926631.1 | green        | 154.63 | 33.3971 | 0.84534  | 0.071295 | 76.186  |
| gi 194041758 ref XM_001924615.1 | blue         | 278.43 | 115.089 | 0.927973 | 0.022952 | 24.776  |
| gi 194041762 ref XM_001927529.1 | turquoise    | 1366.7 | 1365.93 | 0.968856 | 0.006567 | 65.642  |
| gi 194041780 ref XM_001925192.1 | turquoise    | 1482.9 | 1482.34 | 0.986482 | 0.001883 | 101.728 |
| gi 194041796 ref XM_001928803.1 | turquoise    | 1333.8 | 1333.21 | 0.961053 | 0.009172 | 21.236  |
| gi 194041867 ref XM_001925382.1 | blue         | 322.59 | 130.106 | 0.9556   | 0.011156 | 23.184  |
| gi 194041876 ref XM_001926725.1 | turquoise    | 114.17 | 78.1122 | 0.293885 | 0.631272 | 10.51   |
| gi 194041914 ref XM_001928393.1 | tan          | 241.25 | 30.7119 | 0.933204 | 0.020514 | 72.36   |
| gi 194041930 ref XM_001925953.1 | turquoise    | 1559.3 | 1558.91 | 0.997321 | 0.000166 | 2.112   |
| gi 194041932 ref XM_001928812.1 | turquoise    | 912.01 | 909.036 | 0.873349 | 0.053066 | 53.46   |
| gi 194041956 ref XM_001929320.1 | turquoise    | 1553.6 | 1553.18 | 0.996528 | 0.000245 | 3.496   |
| gi 194042013 ref XM_001925277.1 | turquoise    | 907.95 | 906.236 | 0.866723 | 0.057225 | 20.594  |
| gi 194042016 ref XM_001926579.1 | turquoise    | 1557.6 | 1557.23 | 0.997234 | 0.000175 | 122.456 |
| gi 194042125 ref XM_001928342.1 | turquoise    | 1535.8 | 1535.4  | 0.993658 | 0.000606 | 258.016 |
| gi 194042129 ref XM_001927395.1 | greenyellow  | 181.74 | 20.4857 | 0.947455 | 0.014344 | 34.05   |
| gi 194042141 ref XM_001929000.1 | midnightblue | 253.61 | 32.8067 | 0.973433 | 0.005177 | 51.128  |
| gi 194042143 ref XM_001927456.1 | turquoise    | 1028.8 | 1026.88 | 0.90203  | 0.036265 | 42.648  |
| gi 194042161 ref XM_001925705.1 | turquoise    | 1568.6 | 1568.26 | 0.999108 | 3.20E-05 | 18.06   |
| gi 194042188 ref XM_001924178.1 | turquoise    | 81.6   | 34.6889 | 0.129247 | 0.835897 | 47.832  |
| gi 194042190 ref XM_001924717.1 | turquoise    | 181.74 | 98.9852 | 0.25877  | 0.674239 | 86.078  |
| gi 194042230 ref XM_001927832.1 | red          | 141.74 | 36.3026 | 0.91508  | 0.029325 | 13.25   |
| gi 194042287 ref XM_001927955.1 | greenyellow  | 79.93  | 5.15803 | -0.18772 | 0.762395 | 232.368 |
| gi 194042295 ref XM_001928522.1 | turquoise    | 1402.8 | 1402.01 | 0.974144 | 0.004972 | 65.996  |
| gi 194042303 ref XM_001928772.1 | blue         | 339.68 | 141.633 | 0.973858 | 0.005054 | 126.114 |
| gi 194042305 ref XM_001928810.1 | magenta      | 328.07 | 42.9695 | 0.984629 | 0.002282 | 103.902 |
| gi 194042350 ref XM_001924660.1 | blue         | 284.51 | 134.495 | 0.962519 | 0.008661 | 53.804  |
| gi 194042373 ref XM_001925458.1 | brown        | 145.01 | 71.9868 | 0.84294  | 0.072933 | 11.906  |
| gi 194042396 ref XM_001927868.1 | turquoise    | 1565.5 | 1565.12 | 0.998663 | 5.87E-05 | 17.252  |
| gi 194042436 ref XM_001925357.1 | turquoise    | 1533.5 | 1533.13 | 0.993958 | 0.000563 | 7.514   |
| gi 194042438 ref XM_001927977.1 | turquoise    | 95.118 | 52.8332 | 0.216934 | 0.725973 | 34.07   |
| gi 194042440 ref XM_001928136.1 | turquoise    | 1435.3 | 1434.63 | 0.979752 | 0.003448 | 49.604  |
| gi 194042477 ref XM_001926521.1 | turquoise    | 933.22 | 931.503 | 0.871276 | 0.054357 | 22.492  |
| gi 194042479 ref XM_001926556.1 | turquoise    | 1539.3 | 1538.85 | 0.995312 | 0.000385 | 9.582   |
| gi 194042482 ref XM_001925217.1 | turquoise    | 1507.2 | 1506.84 | 0.990153 | 0.001171 | 21.93   |
| gi 194042486 ref XM_001927572.1 | turquoise    | 1512.3 | 1511.72 | 0.99205  | 0.00085  | 12.586  |
| gi 194042528 ref XM_001927272.1 | pink         | 248.99 | 45.2601 | 0.984763 | 0.002253 | 652.286 |
| gi 194042562 ref XM_001925435.1 | brown        | 288.85 | 117.861 | 0.97008  | 0.006185 | 38.09   |
| gi 194042587 ref XM_001928493.1 | turquoise    | 1236.9 | 1235.76 | 0.946855 | 0.014589 | 26.936  |
| gi 194042611 ref XM_001927098.1 | turquoise    | 1502.6 | 1502.1  | 0.989108 | 0.001362 | 11.95   |
| gi 194042690 ref XM_001929322.1 | pink         | 200.03 | 43.5404 | 0.97872  | 0.003714 | 72.954  |

|                                 |           |        |         |          |          |         |
|---------------------------------|-----------|--------|---------|----------|----------|---------|
| gi 194042725 ref XM_001925659.1 | turquoise | 1450   | 1449.37 | 0.982954 | 0.002665 | 13.504  |
| gi 194042745 ref XM_001927026.1 | purple    | 231.25 | 32.7622 | 0.9762   | 0.004392 | 8.374   |
| gi 194042749 ref XM_001925080.1 | turquoise | 160.23 | 133.856 | 0.42118  | 0.480043 | 93.262  |
| gi 194042787 ref XM_001924736.1 | blue      | 283.92 | 140.777 | 0.972639 | 0.00541  | 81.024  |
| gi 194042805 ref XM_001927802.1 | purple    | 173.05 | 26.4419 | 0.911783 | 0.031033 | 238.778 |
| gi 194042819 ref XM_001928170.1 | darkred   | 102.79 | 10.8149 | 0.840121 | 0.074872 | 32.502  |
| gi 194042829 ref XM_001928949.1 | turquoise | 1567   | 1566.56 | 0.999533 | 1.21E-05 | 24.544  |
| gi 194042833 ref XM_001929033.1 | yellow    | 193.76 | 52.2778 | 0.860533 | 0.061199 | 18.642  |
| gi 194042865 ref XM_001925507.1 | turquoise | 1111.6 | 1110.44 | 0.91181  | 0.03102  | 21.548  |
| gi 194042943 ref XM_001929420.1 | turquoise | 401.12 | 392.547 | 0.694442 | 0.193193 | 39.98   |
| gi 194042969 ref XM_001929585.1 | green     | 226.51 | 49.9531 | 0.973458 | 0.00517  | 40.122  |
| gi 194043006 ref XM_001928075.1 | turquoise | 1297   | 1296.02 | 0.957995 | 0.010269 | 25.432  |
| gi 194043042 ref XM_001926896.1 | brown     | 319.16 | 92.6954 | 0.903478 | 0.035472 | 70.876  |
| gi 194043063 ref XM_001925272.1 | turquoise | 1391.6 | 1390.8  | 0.974565 | 0.004851 | 25.352  |
| gi 194043070 ref XM_001928504.1 | tan       | 308.62 | 36.3423 | 0.970885 | 0.005937 | 13.16   |
| gi 194043074 ref XM_001928487.1 | turquoise | 1446.6 | 1445.88 | 0.980737 | 0.0032   | 97.438  |
| gi 194043076 ref XM_001925356.1 | turquoise | 1377.3 | 1376.79 | 0.971065 | 0.005883 | 35.736  |
| gi 194043124 ref XM_001926685.1 | turquoise | 1488   | 1487.43 | 0.987477 | 0.001679 | 57.768  |
| gi 194043177 ref XM_001928608.1 | turquoise | 1525.8 | 1525.44 | 0.991062 | 0.001013 | 4.906   |
| gi 194043187 ref XM_001925978.1 | blue      | 274.99 | 127.64  | 0.951321 | 0.012798 | 52.774  |
| gi 194043189 ref XM_001928908.1 | turquoise | 877.25 | 876.09  | 0.862999 | 0.059606 | 16.408  |
| gi 194043243 ref XM_001924074.1 | blue      | 339.96 | 155.877 | 0.996047 | 0.000298 | 88.756  |
| gi 194043267 ref XM_001926534.1 | turquoise | 204.79 | 191.749 | 0.516353 | 0.37307  | 3.398   |
| gi 194043281 ref XM_001927737.1 | turquoise | 1521.9 | 1521.58 | 0.991819 | 0.000887 | 8.82    |
| gi 194043291 ref XM_001928076.1 | turquoise | 830.24 | 827.546 | 0.850109 | 0.068074 | 101.718 |
| gi 194043329 ref XM_001929273.1 | black     | 270.48 | 39.3069 | 0.982611 | 0.002746 | 80.728  |
| gi 194043337 ref XM_001926296.1 | darkgreen | 289.96 | 23.8223 | 0.997855 | 0.000119 | 18.516  |
| gi 194043363 ref XM_001929468.1 | green     | 262.54 | 50.4352 | 0.970091 | 0.006181 | 31.734  |
| gi 194043388 ref XM_001929537.1 | darkred   | 74.05  | 12.2399 | 0.942522 | 0.016399 | 36.634  |
| gi 194043395 ref XM_001929562.1 | turquoise | 1550.9 | 1550.42 | 0.997344 | 0.000164 | 7.046   |
| gi 194043399 ref XM_001929569.1 | turquoise | 1569   | 1568.64 | 0.999459 | 1.51E-05 | 9.186   |
| gi 194043439 ref XM_001927481.1 | turquoise | 1505.1 | 1504.56 | 0.989318 | 0.001323 | 19.184  |
| gi 194043488 ref XM_001929645.1 | turquoise | 1337   | 1336.45 | 0.963736 | 0.008245 | 8.978   |
| gi 194043591 ref XM_001927268.1 | pink      | 115.66 | 24.4241 | 0.850017 | 0.068136 | 75.99   |
| gi 194043626 ref XM_001926661.1 | turquoise | 1548.6 | 1548.19 | 0.996179 | 0.000283 | 22.294  |
| gi 194043630 ref XM_001926758.1 | turquoise | 1552.4 | 1551.98 | 0.996026 | 0.000301 | 1.784   |
| gi 194043649 ref XM_001925542.1 | turquoise | 464.39 | 458.91  | 0.729398 | 0.161945 | 4.672   |
| gi 194043669 ref XM_001924741.1 | turquoise | 108.8  | 71.4424 | 0.311851 | 0.609471 | 19.492  |
| gi 194043731 ref XM_001926974.1 | turquoise | 122.05 | 107.077 | 0.407018 | 0.496456 | 3.596   |
| gi 194043780 ref XM_001928673.1 | turquoise | 1541.1 | 1540.61 | 0.996444 | 0.000254 | 5.398   |
| gi 194043830 ref XM_001925246.1 | turquoise | 921.01 | 919.142 | 0.86551  | 0.057997 | 6.942   |
| gi 194043856 ref XM_001928206.1 | turquoise | 1428.1 | 1427.42 | 0.979257 | 0.003575 | 40.074  |
| gi 194043858 ref XM_001928335.1 | blue      | 310.23 | 131.438 | 0.956902 | 0.010671 | 32.064  |
| gi 194043865 ref XM_001928489.1 | turquoise | 1553.6 | 1553.18 | 0.996528 | 0.000245 | 0.236   |
| gi 194043908 ref XM_001927890.1 | turquoise | 1285   | 1283.63 | 0.95357  | 0.011926 | 63.282  |
| gi 194043920 ref XM_001925866.1 | navy      | 234.24 | 32.1134 | 0.982176 | 0.002849 | 9.594   |
| gi 194043935 ref XM_001924322.1 | turquoise | 1340.3 | 1339.43 | 0.964176 | 0.008095 | 19.902  |
| gi 194043947 ref XM_001925017.1 | turquoise | 749.53 | 745.683 | 0.826665 | 0.084341 | 24.918  |

|                                 |              |        |         |          |          |          |
|---------------------------------|--------------|--------|---------|----------|----------|----------|
| gi 194043951 ref XM_001927705.1 | turquoise    | 185.2  | 118.725 | 0.317258 | 0.602937 | 24.388   |
| gi 194043957 ref XM_001925803.1 | grey60       | 249.78 | 33.1018 | 0.997693 | 0.000133 | 1150.344 |
| gi 194043959 ref XM_001927448.1 | turquoise    | 1420.3 | 1419.53 | 0.977313 | 0.004088 | 44.33    |
| gi 194043997 ref XM_001926349.1 | turquoise    | 1153.1 | 1151.5  | 0.929966 | 0.022013 | 56.05    |
| gi 194044032 ref XM_001928774.1 | royalblue    | 205.09 | 19.956  | 0.936493 | 0.019028 | 37.174   |
| gi 194044034 ref XM_001928794.1 | turquoise    | 1547   | 1546.48 | 0.997222 | 0.000176 | 423.108  |
| gi 194044044 ref XM_001927332.1 | blue         | 270.56 | 122.709 | 0.941434 | 0.016864 | 11.314   |
| gi 194044061 ref XM_001927723.1 | turquoise    | 906.77 | 903.69  | 0.87542  | 0.051787 | 7.962    |
| gi 194044069 ref XM_001925245.1 | turquoise    | 132.66 | 103.803 | 0.362437 | 0.548843 | 15.082   |
| gi 194044114 ref XM_001924459.1 | turquoise    | 60.468 | 40.5908 | 0.216182 | 0.726908 | 95.016   |
| gi 194044123 ref XM_001926788.1 | lightyellow  | 304    | 24.7823 | 0.98724  | 0.001727 | 78.056   |
| gi 194044132 ref XM_001927798.1 | turquoise    | 1480.9 | 1480.37 | 0.987064 | 0.001763 | 75.62    |
| gi 194044165 ref XM_001924403.1 | turquoise    | 1530.3 | 1529.81 | 0.994908 | 0.000436 | 2.32     |
| gi 194044169 ref XM_001924460.1 | turquoise    | 1172.6 | 1171.03 | 0.930718 | 0.021662 | 74.538   |
| gi 194044171 ref XM_001924505.1 | brown        | 214.67 | 115.071 | 0.9696   | 0.006334 | 11.59    |
| gi 194044267 ref XM_001925000.1 | turquoise    | 1537.8 | 1537.43 | 0.993245 | 0.000666 | 3.968    |
| gi 194044285 ref XM_001926002.1 | turquoise    | 1103   | 1100.79 | 0.917143 | 0.028272 | 18.902   |
| gi 194044289 ref XM_001926487.1 | turquoise    | 1535.6 | 1535.14 | 0.995822 | 0.000324 | 72.626   |
| gi 194044465 ref XM_001928874.1 | midnightblue | 236.14 | 34.8704 | 0.986448 | 0.00189  | 12.122   |
| gi 194044483 ref XM_001929150.1 | turquoise    | 894.59 | 891.21  | 0.872267 | 0.053739 | 104.984  |
| gi 194044495 ref XM_001929295.1 | turquoise    | 409.55 | 392.255 | 0.666646 | 0.219122 | 5.54     |
| gi 194044506 ref XM_001927374.1 | purple       | 201.8  | 34.4407 | 0.982363 | 0.002804 | 34.238   |
| gi 194044550 ref XM_001927682.1 | turquoise    | 1095   | 1092.53 | 0.914787 | 0.029475 | 59.878   |
| gi 194044564 ref XM_001925248.1 | turquoise    | 1548.3 | 1547.93 | 0.995962 | 0.000308 | 21.818   |
| gi 194044568 ref XM_001928462.1 | turquoise    | 1456.6 | 1455.85 | 0.984119 | 0.002397 | 32.936   |
| gi 194044570 ref XM_001928614.1 | turquoise    | 1528.9 | 1528.46 | 0.992554 | 0.00077  | 16.428   |
| gi 194044572 ref XM_001925488.1 | lightcyan    | 150.31 | 6.99391 | 0.287706 | 0.6388   | 25.408   |
| gi 194044574 ref XM_001928737.1 | turquoise    | 1553.6 | 1553.18 | 0.996528 | 0.000245 | 2.598    |
| gi 194044593 ref XM_001929063.1 | red          | 144.09 | 39.1359 | 0.93091  | 0.021573 | 35.88    |
| gi 194044682 ref XM_001928813.1 | turquoise    | 133.86 | 66.0464 | 0.249981 | 0.685061 | 24.616   |
| gi 194044732 ref XM_001927204.1 | turquoise    | 1434.9 | 1434.38 | 0.976706 | 0.004253 | 38.918   |
| gi 194044782 ref XM_001926654.1 | navy         | 249.62 | 32.9757 | 0.989022 | 0.001379 | 13.396   |
| gi 194044800 ref XM_001924191.1 | turquoise    | 64.889 | 51.5237 | 0.27825  | 0.650348 | 40.11    |
| gi 194044879 ref XM_001925452.1 | red          | 233    | 48.2948 | 0.978762 | 0.003704 | 8.698    |
| gi 194044905 ref XM_001926512.1 | turquoise    | 1532.8 | 1532.46 | 0.992514 | 0.000777 | 3.294    |
| gi 194044921 ref XM_001927440.1 | turquoise    | 1566.3 | 1565.91 | 0.999265 | 2.39E-05 | 24.44    |
| gi 194044923 ref XM_001927589.1 | turquoise    | 1511.3 | 1510.79 | 0.991692 | 0.000908 | 11.198   |
| gi 194044925 ref XM_001927734.1 | turquoise    | 702.98 | 696.932 | 0.809402 | 0.096982 | 85.18    |
| gi 194044929 ref XM_001925991.1 | turquoise    | 1413.7 | 1413.09 | 0.971551 | 0.005736 | 7.658    |
| gi 194044943 ref XM_001926010.1 | pink         | 210.96 | 39.05   | 0.951991 | 0.012536 | 62.096   |
| gi 194044951 ref XM_001925471.1 | turquoise    | 1055.8 | 1053.56 | 0.910465 | 0.031725 | 32.374   |
| gi 194044985 ref XM_001927811.1 | turquoise    | 1467.2 | 1466.72 | 0.983478 | 0.002543 | 5.184    |
| gi 194044987 ref XM_001927848.1 | turquoise    | 419.83 | 414.505 | 0.685855 | 0.201106 | 38.478   |
| gi 194045046 ref XM_001924519.1 | turquoise    | 291.55 | 269.848 | 0.571964 | 0.313681 | 20.188   |
| gi 194045056 ref XM_001924869.1 | turquoise    | 1553.6 | 1553.18 | 0.996528 | 0.000245 | 1.748    |
| gi 194045058 ref XM_001925649.1 | turquoise    | 1553.6 | 1553.18 | 0.996528 | 0.000245 | 1.04     |
| gi 194045072 ref XM_001927451.1 | blue         | 240.14 | 108.747 | 0.915185 | 0.029271 | 8.412    |
| gi 194045084 ref XM_001925136.1 | turquoise    | 103.23 | 92.603  | 0.388081 | 0.518579 | 4.694    |

|                                   |             |        |         |          |          |         |
|-----------------------------------|-------------|--------|---------|----------|----------|---------|
| gi 194045109 ref XM_001927874.1   | turquoise   | 1289.4 | 1288.1  | 0.95507  | 0.011355 | 34.44   |
| gi 194045111 ref XM_001927898.1   | yellow      | 271.87 | 69.0897 | 0.92774  | 0.023063 | 57.822  |
| gi 194271212 gb EU714326.1        | turquoise   | 1397.4 | 1396.9  | 0.968205 | 0.006773 | 10.292  |
| gi 194332486 ref NM_001130213.1   | darkred     | 67.897 | 7.19021 | 0.700799 | 0.187394 | 75.436  |
| gi 194474045 ref NM_001130534.1   | pink        | 206.94 | 45.0401 | 0.985237 | 0.002148 | 24.728  |
| gi 194474047 ref NM_001130535.1   | turquoise   | 315.19 | 305.195 | 0.637727 | 0.247031 | 68.814  |
| gi 1955 emb X17058.1              | turquoise   | 1371.4 | 1370.5  | 0.969552 | 0.006349 | 11.838  |
| gi 195539469 ref NM_001130733.1   | red         | 181.99 | 43.8187 | 0.959447 | 0.009743 | 84.19   |
| gi 196259975 ref NM_001131045.1   | turquoise   | 1381.2 | 1380.37 | 0.972239 | 0.005529 | 87.648  |
| gi 197251933 ref NM_001134354.1   | turquoise   | 1555.8 | 1555.45 | 0.99718  | 0.00018  | 6.124   |
| gi 197717772 gb EF113595.2        | green       | 156.89 | 35.2203 | 0.879775 | 0.049129 | 232.98  |
| gi 198282078 ref NM_001134823.1   | brown       | 110.82 | 58.7603 | 0.821755 | 0.08788  | 950.9   |
| gi 19919837 gb AF490841.1         | turquoise   | 139.83 | 107.047 | 0.396038 | 0.509259 | 128.1   |
| gi 201066355 ref NM_001134967.1   | turquoise   | 1558.9 | 1558.48 | 0.997572 | 0.000144 | 3.982   |
| gi 201066357 ref NM_001134968.1   | pink        | 276.61 | 41.3342 | 0.961008 | 0.009188 | 300.808 |
| gi 2035 emb X16638.1              | turquoise   | 1468   | 1467.28 | 0.985867 | 0.002013 | 35.81   |
| gi 208610189 ref NM_001135680.1   | turquoise   | 1435.4 | 1434.61 | 0.979507 | 0.003511 | 30.11   |
| gi 209863046 ref NM_001135965.1   | greenyellow | 178.42 | 22.3353 | 0.989378 | 0.001312 | 46.43   |
| gi 209863048 ref NM_001135966.1   | turquoise   | 634.66 | 625.151 | 0.776882 | 0.122191 | 7.194   |
| gi 212549622 ref NM_001137629.1   | turquoise   | 1497.6 | 1497.14 | 0.986301 | 0.001921 | 13.242  |
| gi 212549654 ref NM_001137635.1   | turquoise   | 1498.9 | 1498.42 | 0.987716 | 0.001631 | 5.438   |
| gi 212549656 ref NM_001137636.1   | turquoise   | 1515.4 | 1514.96 | 0.992052 | 0.00085  | 7.34    |
| gi 217416473 ref NM_001142668.1   | turquoise   | 264.14 | 249.955 | 0.585028 | 0.300113 | 17.816  |
| gi 217416475 ref NM_001142669.1   | red         | 153.5  | 37.939  | 0.92681  | 0.023506 | 7.152   |
| gi 218082010 ref NM_001142666.1   | lightgreen  | 129.87 | 7.2068  | 0.624107 | 0.260485 | 30.602  |
| gi 2286009 emb AJ000786.1         | brown       | 181.79 | 107.549 | 0.95288  | 0.012191 | 65.132  |
| gi 29373949 emb AJ539380.1        | yellow      | 188.76 | 52.9523 | 0.881351 | 0.048177 | 73.652  |
| gi 2988384 gb AF033855.1 AF033855 | lightcyan   | 115.97 | 5.319   | 0.314437 | 0.606345 | 11.63   |
| gi 34582610 gb AY368623.1         | turquoise   | 1164.1 | 1162.55 | 0.933574 | 0.020346 | 476.262 |
| gi 35384837 gb AY374470.1         | royalblue   | 179.14 | 25.2421 | 0.986924 | 0.001791 | 19.72   |
| gi 37050908 emb AJ583708.1        | turquoise   | 1451.4 | 1450.86 | 0.978727 | 0.003713 | 2.468   |
| gi 38455773 gb AY349420.1         | turquoise   | 1472.8 | 1472.4  | 0.982636 | 0.00274  | 3.566   |
| gi 4186150 emb AJ236938.1         | greenyellow | 114.85 | 14.066  | 0.892543 | 0.041597 | 40.006  |
| gi 45268992 gb AY550051.1         | purple      | 109.72 | 2.69096 | 0.351705 | 0.561607 | 27.182  |
| gi 46095042 gb AY574215.1         | turquoise   | 1458.5 | 1457.78 | 0.984235 | 0.00237  | 20.65   |
| gi 47522617 ref NM_213934.1       | turquoise   | 1329.1 | 1327.99 | 0.961939 | 0.008863 | 33.782  |
| gi 47522629 ref NM_213928.1       | turquoise   | 1493   | 1492.61 | 0.98608  | 0.001967 | 12.082  |
| gi 47522635 ref NM_213927.1       | turquoise   | 138.38 | 114.75  | 0.403448 | 0.500612 | 14.276  |
| gi 47522641 ref NM_213922.1       | lightgreen  | 70.962 | 15.3653 | 0.942953 | 0.016216 | 37.852  |
| gi 47522647 ref NM_213921.1       | turquoise   | 1428   | 1427.41 | 0.980483 | 0.003264 | 16.674  |
| gi 47522661 ref NM_213911.1       | turquoise   | 1566.9 | 1566.56 | 0.99889  | 4.44E-05 | 275.984 |
| gi 47522679 ref NM_213904.1       | turquoise   | 1503   | 1502.37 | 0.990028 | 0.001194 | 49.03   |
| gi 47522681 ref NM_213901.1       | brown       | 185.82 | 108.779 | 0.956579 | 0.01079  | 4.214   |
| gi 47522685 ref NM_213898.1       | greenyellow | 157.84 | 20.5448 | 0.957798 | 0.010341 | 14.436  |
| gi 47522691 ref NM_213897.1       | lightyellow | 209.66 | 16.9606 | 0.882202 | 0.047667 | 66.05   |
| gi 47522703 ref NM_213891.1       | turquoise   | 862.17 | 860.509 | 0.870552 | 0.05481  | 81.136  |
| gi 47522707 ref NM_213889.1       | turquoise   | 1482.3 | 1481.74 | 0.988421 | 0.001493 | 4.166   |
| gi 47522709 ref NM_213885.1       | turquoise   | 1543.6 | 1543.21 | 0.994159 | 0.000535 | 2.694   |

|                             |             |        |         |          |          |         |
|-----------------------------|-------------|--------|---------|----------|----------|---------|
| gi 47522727 ref NM_213949.1 | turquoise   | 1336   | 1335.25 | 0.961278 | 0.009094 | 35.748  |
| gi 47522737 ref NM_213954.1 | navy        | 253.27 | 31.6949 | 0.977444 | 0.004053 | 41.276  |
| gi 47522753 ref NM_213962.1 | turquoise   | 1103   | 1101.93 | 0.917399 | 0.028142 | 51.56   |
| gi 47522761 ref NM_213967.1 | royalblue   | 252.66 | 20.8195 | 0.942409 | 0.016447 | 35.43   |
| gi 47522763 ref NM_213968.1 | turquoise   | 1408.9 | 1408.06 | 0.974863 | 0.004766 | 130.722 |
| gi 47522769 ref NM_213971.1 | turquoise   | 1057   | 1055.74 | 0.901246 | 0.036696 | 11.086  |
| gi 47522773 ref NM_213973.1 | turquoise   | 1541.6 | 1541.21 | 0.994695 | 0.000463 | 13.352  |
| gi 47522779 ref NM_213977.1 | turquoise   | 1563.8 | 1563.35 | 0.998886 | 4.46E-05 | 31.994  |
| gi 47522785 ref NM_213980.1 | red         | 155.8  | 39.9964 | 0.937392 | 0.018628 | 45.766  |
| gi 47522797 ref NM_213986.1 | red         | 190.84 | 48.687  | 0.982245 | 0.002832 | 1.516   |
| gi 47522799 ref NM_213987.1 | lightyellow | 276.67 | 23.3942 | 0.959648 | 0.009671 | 16.74   |
| gi 47522821 ref NM_213998.1 | turquoise   | 1112.8 | 1111.66 | 0.911589 | 0.031135 | 8.254   |
| gi 47522831 ref NM_214003.1 | turquoise   | 591.58 | 581.415 | 0.762656 | 0.133752 | 142.956 |
| gi 47522845 ref NM_214010.1 | turquoise   | 203.82 | 188.989 | 0.505756 | 0.384668 | 35.24   |
| gi 47522855 ref NM_214017.1 | turquoise   | 681.33 | 678.332 | 0.807366 | 0.098507 | 4.182   |
| gi 47522861 ref NM_214020.1 | green       | 192.32 | 49.2558 | 0.960798 | 0.009263 | 21.024  |
| gi 47522869 ref NM_214024.1 | turquoise   | 1163.9 | 1162.07 | 0.93318  | 0.020525 | 78.79   |
| gi 47522871 ref NM_214025.1 | turquoise   | 1175.8 | 1174.89 | 0.935684 | 0.01939  | 1.788   |
| gi 47522897 ref NM_214039.1 | magenta     | 301.88 | 40.2166 | 0.971875 | 0.005638 | 19.062  |
| gi 47522915 ref NM_214050.1 | brown       | 257.5  | 113.599 | 0.960583 | 0.009338 | 6.366   |
| gi 47522919 ref NM_214052.1 | yellow      | 205.49 | 76.1337 | 0.970789 | 0.005967 | 11.878  |
| gi 47522921 ref NM_214053.1 | turquoise   | 1087.7 | 1085.24 | 0.913635 | 0.03007  | 13.756  |
| gi 47522923 ref NM_214054.1 | turquoise   | 1564.2 | 1563.76 | 0.998621 | 6.14E-05 | 11.564  |
| gi 47522935 ref NM_214060.1 | grey60      | 266.89 | 30.9955 | 0.983481 | 0.002542 | 101.822 |
| gi 47522939 ref NM_214062.1 | turquoise   | 1416.6 | 1416.05 | 0.972727 | 0.005384 | 35.502  |
| gi 47522941 ref NM_214063.1 | yellow      | 131.07 | 43.6762 | 0.796735 | 0.106591 | 93.43   |
| gi 47522943 ref NM_214064.1 | turquoise   | 1039.9 | 1038.57 | 0.898256 | 0.038358 | 2.84    |
| gi 47522957 ref NM_214072.1 | turquoise   | 1349.7 | 1348.89 | 0.960087 | 0.009515 | 45.354  |
| gi 47522983 ref NM_214086.1 | green       | 106.7  | 27.6882 | 0.838577 | 0.075941 | 62.31   |
| gi 47523015 ref NM_214103.1 | turquoise   | 339.25 | 321.036 | 0.631249 | 0.253406 | 200.302 |
| gi 47523037 ref NM_214115.1 | turquoise   | 325.02 | 313.156 | 0.636457 | 0.248278 | 185.094 |
| gi 47523039 ref NM_214116.1 | royalblue   | 119.31 | 16.5973 | 0.888189 | 0.044121 | 112.73  |
| gi 47523067 ref NM_214132.1 | green       | 282.48 | 43.5982 | 0.923453 | 0.025129 | 3.146   |
| gi 47523085 ref NM_214144.1 | blue        | 278.41 | 137.351 | 0.96689  | 0.007196 | 69.4    |
| gi 47523093 ref NM_213884.1 | turquoise   | 1563.6 | 1563.17 | 0.998671 | 5.81E-05 | 73      |
| gi 47523095 ref NM_213881.1 | lightgreen  | 107.98 | 10.7673 | 0.85285  | 0.066244 | 112.302 |
| gi 47523129 ref NM_213866.1 | turquoise   | 1553.6 | 1553.18 | 0.996528 | 0.000245 | 0.33    |
| gi 47523187 ref NM_213830.1 | pink        | 119.02 | 28.8497 | 0.882242 | 0.047642 | 5.528   |
| gi 47523211 ref NM_213815.1 | turquoise   | 1549.6 | 1549.22 | 0.995969 | 0.000307 | 17.088  |
| gi 47523255 ref NM_213792.1 | yellow      | 186.64 | 79.4322 | 0.982991 | 0.002656 | 15.674  |
| gi 47523261 ref NM_213791.1 | turquoise   | 94.481 | 80.9089 | 0.395366 | 0.510045 | 4.146   |
| gi 47523281 ref NM_213781.1 | turquoise   | 694.28 | 689.179 | 0.810905 | 0.09586  | 2.17    |
| gi 47523317 ref NM_213763.1 | turquoise   | 1555.4 | 1555.05 | 0.997139 | 0.000184 | 68.082  |
| gi 47523343 ref NM_213746.1 | turquoise   | 1532   | 1531.56 | 0.993057 | 0.000694 | 3.89    |
| gi 47523353 ref NM_213741.1 | turquoise   | 1014.8 | 1011.63 | 0.896279 | 0.039469 | 6.238   |
| gi 47523403 ref NM_214157.1 | turquoise   | 660.9  | 652.407 | 0.78887  | 0.112695 | 19.156  |
| gi 47523443 ref NM_214181.1 | brown       | 206.3  | 121.483 | 0.986038 | 0.001976 | 27.274  |
| gi 47523445 ref NM_214183.1 | magenta     | 293.08 | 39.7631 | 0.969694 | 0.006304 | 14.876  |



|                             |               |        |         |          |          |         |
|-----------------------------|---------------|--------|---------|----------|----------|---------|
| gi 47523461 ref NM_214192.1 | lightgreen    | 77.999 | 12.7477 | 0.901706 | 0.036443 | 630.138 |
| gi 47523463 ref NM_214188.1 | yellow        | 191.3  | 72.8661 | 0.957153 | 0.010578 | 55.326  |
| gi 47523473 ref NM_214198.1 | brown         | 290.68 | 95.4194 | 0.910207 | 0.031861 | 6.118   |
| gi 47523483 ref NM_214199.1 | green         | 251.12 | 52.7142 | 0.978045 | 0.003892 | 66.146  |
| gi 47523487 ref NM_214201.1 | turquoise     | 216.77 | 181.805 | 0.470494 | 0.423849 | 56.41   |
| gi 47523491 ref NM_214204.1 | yellow        | 281.92 | 75.3799 | 0.959515 | 0.009719 | 572.888 |
| gi 47523501 ref NM_214213.1 | midnightblue  | 223.01 | 36.4466 | 0.995808 | 0.000326 | 9.668   |
| gi 47523533 ref NM_214229.1 | turquoise     | 1546.7 | 1546.32 | 0.995702 | 0.000338 | 3.396   |
| gi 47523537 ref NM_214231.1 | turquoise     | 1516.2 | 1515.71 | 0.992816 | 0.00073  | 1.954   |
| gi 47523543 ref NM_214230.1 | turquoise     | 1489.5 | 1488.9  | 0.988214 | 0.001533 | 92.214  |
| gi 47523553 ref NM_214240.1 | turquoise     | 1363.7 | 1362.8  | 0.965151 | 0.007768 | 37.614  |
| gi 47523559 ref NM_214239.1 | yellow        | 169.69 | 49.1582 | 0.845233 | 0.071368 | 38.99   |
| gi 47523561 ref NM_214245.1 | turquoise     | 1392.6 | 1391.98 | 0.97141  | 0.005778 | 15.99   |
| gi 47523567 ref NM_214244.1 | salmon        | 110.66 | 25.3583 | 0.940358 | 0.017328 | 19.754  |
| gi 47523569 ref NM_214249.1 | turquoise     | 734    | 727.876 | 0.818108 | 0.090539 | 49.86   |
| gi 47523579 ref NM_214250.1 | turquoise     | 1214.7 | 1213.22 | 0.943039 | 0.016179 | 35.598  |
| gi 47523581 ref NM_214257.1 | greenyellow   | 112.65 | 4.29465 | 0.36925  | 0.54077  | 5.72    |
| gi 47523607 ref NM_214267.1 | turquoise     | 1521.6 | 1521.07 | 0.993079 | 0.00069  | 19.348  |
| gi 47523617 ref NM_214276.1 | turquoise     | 1292   | 1291.21 | 0.952874 | 0.012193 | 23.024  |
| gi 47523637 ref NM_214287.1 | brown         | 165.88 | 59.6403 | 0.816464 | 0.091745 | 14.46   |
| gi 47523641 ref NM_214289.1 | grey          | 225.77 | 13.7947 | 0.855539 | 0.064464 | 31.388  |
| gi 47523665 ref NM_214304.1 | turquoise     | 236.89 | 228.584 | 0.561863 | 0.324275 | 32.21   |
| gi 47523669 ref NM_214306.1 | turquoise     | 1053.6 | 1052.29 | 0.912486 | 0.030666 | 41.044  |
| gi 47523673 ref NM_214308.1 | lightgreen    | 66.789 | 16.4358 | 0.966709 | 0.007255 | 97.33   |
| gi 47523675 ref NM_214305.1 | turquoise     | 1510.3 | 1509.87 | 0.988517 | 0.001475 | 3.39    |
| gi 47523679 ref NM_214307.1 | darkgreen     | 234.52 | 22.9587 | 0.980323 | 0.003304 | 134.25  |
| gi 47523681 ref NM_214312.1 | turquoise     | 1428.4 | 1427.97 | 0.975055 | 0.004712 | 17.096  |
| gi 47523683 ref NM_214309.1 | blue          | 307.64 | 151.309 | 0.989561 | 0.001278 | 33.842  |
| gi 47523689 ref NM_214316.1 | turquoise     | 188.85 | 174.837 | 0.522006 | 0.366918 | 17.414  |
| gi 47523691 ref NM_214313.1 | lightcyan     | 187.68 | 7.42701 | 0.328583 | 0.589291 | 19.236  |
| gi 47523699 ref NM_214317.1 | turquoise     | 1553.6 | 1553.18 | 0.996528 | 0.000245 | 7.086   |
| gi 47523715 ref NM_214327.1 | turquoise     | 1539.9 | 1539.43 | 0.99515  | 0.000405 | 12.928  |
| gi 47523717 ref NM_214328.1 | turquoise     | 158.56 | 136.753 | 0.434561 | 0.464644 | 2.266   |
| gi 47523719 ref NM_214330.1 | turquoise     | 1350.7 | 1349.97 | 0.959817 | 0.009611 | 82.924  |
| gi 47523721 ref NM_214331.1 | turquoise     | 248.36 | 233.347 | 0.57046  | 0.315253 | 75.684  |
| gi 47523723 ref NM_214332.1 | brown         | 305.03 | 113.798 | 0.956495 | 0.010822 | 505.572 |
| gi 47523725 ref NM_214333.1 | turquoise     | 321.9  | 316.935 | 0.657045 | 0.228286 | 84.526  |
| gi 47523733 ref NM_214337.1 | turquoise     | 1092.7 | 1091.48 | 0.915138 | 0.029295 | 3.96    |
| gi 47523737 ref NM_214339.1 | darkturquoise | 227.1  | 7.62832 | 0.773561 | 0.124862 | 44.31   |
| gi 47523743 ref NM_214342.1 | turquoise     | 1503.9 | 1503.24 | 0.991101 | 0.001006 | 29.856  |
| gi 47523769 ref NM_214356.1 | red           | 235.39 | 52.5421 | 0.997495 | 0.00015  | 52.11   |
| gi 47523779 ref NM_214361.1 | turquoise     | 541.9  | 538.347 | 0.74945  | 0.144757 | 79.832  |
| gi 47523785 ref NM_214364.1 | turquoise     | 1433.6 | 1433.1  | 0.974996 | 0.004728 | 10.522  |
| gi 47523789 ref NM_214366.1 | turquoise     | 426.71 | 408.336 | 0.67008  | 0.215869 | 98.04   |
| gi 47523799 ref NM_214372.1 | turquoise     | 1549   | 1548.65 | 0.995452 | 0.000368 | 241.998 |
| gi 47523805 ref NM_214375.1 | green         | 145.14 | 18.2016 | 0.731072 | 0.160488 | 190.166 |
| gi 47523819 ref NM_214382.1 | turquoise     | 527.55 | 523.766 | 0.742342 | 0.150785 | 61.498  |
| gi 47523843 ref NM_214395.1 | turquoise     | 1553.6 | 1553.18 | 0.996528 | 0.000245 | 11.668  |

|                                |               |        |         |          |          |          |
|--------------------------------|---------------|--------|---------|----------|----------|----------|
| gi 47523845 ref NM_214396.1    | salmon        | 200.17 | 31.3796 | 0.993985 | 0.000559 | 114.9    |
| gi 47523847 ref NM_214397.1    | turquoise     | 1560.4 | 1560.02 | 0.997514 | 0.000149 | 22.316   |
| gi 47523867 ref NM_214407.1    | turquoise     | 1129.1 | 1127.64 | 0.923327 | 0.025191 | 113.446  |
| gi 47523869 ref NM_214408.1    | turquoise     | 278.76 | 257.541 | 0.572768 | 0.312842 | 81.484   |
| gi 47523887 ref NM_214418.1    | yellow        | 203.21 | 52.6843 | 0.863729 | 0.059137 | 201.71   |
| gi 47523913 ref NM_214432.1    | turquoise     | 1326.7 | 1325.57 | 0.962276 | 0.008745 | 22.266   |
| gi 47523931 ref NM_214440.1    | turquoise     | 1486.5 | 1485.95 | 0.987145 | 0.001746 | 10.862   |
| gi 48374062 ref NM_001001535.1 | pink          | 264.72 | 45.0411 | 0.981667 | 0.002972 | 2674.704 |
| gi 48374070 ref NM_001001539.1 | blue          | 332.87 | 126.648 | 0.948172 | 0.014053 | 94.876   |
| gi 48675942 ref NM_001001640.1 | darkturquoise | 217.35 | 16.9088 | 0.978215 | 0.003847 | 9.986    |
| gi 48675952 ref NM_001001643.1 | purple        | 184.02 | 25.1411 | 0.904275 | 0.035038 | 184.924  |
| gi 48675954 ref NM_001001644.1 | turquoise     | 1368.6 | 1367.54 | 0.968974 | 0.00653  | 15.194   |
| gi 48675956 ref NM_001001645.1 | lightcyan     | 174.2  | 7.3623  | 0.273665 | 0.655958 | 76.2     |
| gi 48976064 ref NM_001001649.2 | green         | 249.67 | 41.7936 | 0.926888 | 0.023469 | 255.366  |
| gi 48976128 ref NM_001001770.1 | brown         | 119.35 | 61.3325 | 0.808906 | 0.097353 | 132.582  |
| gi 49274614 ref NM_001001860.1 | purple        | 148.93 | 24.0855 | 0.886643 | 0.045028 | 622.422  |
| gi 50657387 ref NM_001002824.1 | turquoise     | 1377.8 | 1377.3  | 0.967551 | 0.006983 | 4.016    |
| gi 50979292 ref NM_213742.1    | turquoise     | 1263.8 | 1262.42 | 0.949166 | 0.013653 | 1.576    |
| gi 51592101 ref NM_001004028.1 | turquoise     | 1465.6 | 1465.22 | 0.981955 | 0.002902 | 14.478   |
| gi 51592104 ref NM_001004027.1 | turquoise     | 1348.6 | 1348.01 | 0.959668 | 0.009664 | 8.454    |
| gi 51592110 ref NM_001004031.1 | yellow        | 143.54 | 55.8645 | 0.87917  | 0.049496 | 77.256   |
| gi 51592116 ref NM_001004034.1 | turquoise     | 1508.4 | 1507.97 | 0.988163 | 0.001543 | 14.932   |
| gi 51592138 ref NM_001004045.1 | turquoise     | 1545.6 | 1545.1  | 0.996718 | 0.000226 | 72.206   |
| gi 51592144 ref NM_001004049.1 | brown         | 231.46 | 101.037 | 0.933681 | 0.020297 | 5.326    |
| gi 51592146 ref NM_001004050.1 | turquoise     | 1545   | 1544.57 | 0.995585 | 0.000352 | 8.826    |
| gi 52350674 gb AY609390.1      | turquoise     | 1561.1 | 1560.67 | 0.998402 | 7.67E-05 | 13.782   |
| gi 52350683 gb AY609399.1      | turquoise     | 1368.9 | 1368.05 | 0.967406 | 0.007029 | 70.514   |
| gi 52350686 gb AY609402.1      | midnightblue  | 282.17 | 28.2014 | 0.940592 | 0.017226 | 23.018   |
| gi 52350690 gb AY609406.1      | yellow        | 95.744 | 42.0309 | 0.810356 | 0.096269 | 36.172   |
| gi 52350718 gb AY609433.1      | purple        | 155.71 | 25.2205 | 0.90652  | 0.033824 | 18.226   |
| gi 52350726 gb AY609441.1      | turquoise     | 817.48 | 813.837 | 0.844886 | 0.071604 | 17.476   |
| gi 52351064 gb AY609469.1      | turquoise     | 599.04 | 596.695 | 0.782403 | 0.117789 | 7.698    |
| gi 52351065 gb AY609470.1      | brown         | 189.46 | 107.04  | 0.950835 | 0.012989 | 41.19    |
| gi 52351069 gb AY609474.1      | turquoise     | 1473.3 | 1472.67 | 0.98498  | 0.002205 | 15.262   |
| gi 52351075 gb AY609480.1      | turquoise     | 1353.7 | 1352.69 | 0.965928 | 0.007511 | 16.624   |
| gi 52351085 gb AY609490.1      | turquoise     | 1503.5 | 1503.14 | 0.988803 | 0.00142  | 7.414    |
| gi 52351086 gb AY609491.1      | royalblue     | 177.22 | 25.1261 | 0.985827 | 0.002021 | 5.692    |
| gi 52351090 gb AY609495.1      | turquoise     | 1401   | 1400.36 | 0.973983 | 0.005018 | 268.918  |
| gi 52351103 gb AY609508.1      | turquoise     | 1319.5 | 1318.84 | 0.955693 | 0.011121 | 9.956    |
| gi 52351109 gb AY609514.1      | turquoise     | 1478.6 | 1477.93 | 0.986758 | 0.001826 | 35.906   |
| gi 52351111 gb AY609516.1      | turquoise     | 1554.1 | 1553.72 | 0.996596 | 0.000238 | 45.294   |
| gi 52351116 gb AY609521.1      | turquoise     | 1540.2 | 1539.8  | 0.995571 | 0.000354 | 72.904   |
| gi 52351120 gb AY609525.1      | turquoise     | 159.69 | 126.264 | 0.405901 | 0.497755 | 120.326  |
| gi 52351125 gb AY609530.1      | turquoise     | 921.62 | 917.741 | 0.873049 | 0.053252 | 71.804   |
| gi 52351129 gb AY609534.1      | magenta       | 304.82 | 40.8384 | 0.975371 | 0.004623 | 9.2      |
| gi 52351137 gb AY609542.1      | turquoise     | 1560.2 | 1559.76 | 0.998739 | 5.37E-05 | 7.776    |
| gi 52351148 gb AY609553.1      | turquoise     | 1472.2 | 1471.77 | 0.982975 | 0.00266  | 59.81    |
| gi 52351160 gb AY609565.1      | brown         | 204.97 | 111.609 | 0.961883 | 0.008882 | 6.312    |

|                           |             |        |         |          |          |         |
|---------------------------|-------------|--------|---------|----------|----------|---------|
| gi 52351167 gb AY609572.1 | turquoise   | 105.86 | 42.0347 | 0.15914  | 0.798235 | 91.158  |
| gi 52351174 gb AY609579.1 | turquoise   | 1370.3 | 1369.35 | 0.969255 | 0.006441 | 15.78   |
| gi 52351176 gb AY609581.1 | green       | 116.82 | 33.895  | 0.880594 | 0.048634 | 16.648  |
| gi 52351191 gb AY609596.1 | grey60      | 210.55 | 27.3328 | 0.957349 | 0.010506 | 46.086  |
| gi 52351201 gb AY609606.1 | royalblue   | 197.81 | 25.269  | 0.988727 | 0.001434 | 28.244  |
| gi 52351209 gb AY609612.1 | turquoise   | 657.03 | 653.453 | 0.784997 | 0.115737 | 59.138  |
| gi 52351212 gb AY609615.1 | turquoise   | 1507   | 1506.36 | 0.990579 | 0.001096 | 13.14   |
| gi 52351225 gb AY609657.1 | blue        | 303.11 | 150.683 | 0.988457 | 0.001486 | 25.106  |
| gi 52351234 gb AY609666.1 | lightyellow | 252.73 | 21.5418 | 0.934464 | 0.019941 | 68.178  |
| gi 52351253 gb AY609685.1 | turquoise   | 203.53 | 155.56  | 0.403277 | 0.50081  | 64.912  |
| gi 52351260 gb AY609692.1 | turquoise   | 1457.8 | 1457.23 | 0.981674 | 0.00297  | 49.872  |
| gi 52351277 gb AY609709.1 | salmon      | 107.98 | 25.1108 | 0.938204 | 0.018268 | 53.06   |
| gi 52351285 gb AY609717.1 | brown       | 228.74 | 120.754 | 0.98204  | 0.002881 | 4.718   |
| gi 52351294 gb AY609726.1 | blue        | 326.05 | 138.815 | 0.969577 | 0.006341 | 10.13   |
| gi 52351299 gb AY609731.1 | darkgreen   | 281.14 | 22.6945 | 0.986535 | 0.001872 | 3.066   |
| gi 52351303 gb AY609735.1 | turquoise   | 1391.7 | 1391.16 | 0.969075 | 0.006498 | 34.372  |
| gi 52351306 gb AY609738.1 | turquoise   | 1329.4 | 1328.37 | 0.958717 | 0.010007 | 57.196  |
| gi 52351323 gb AY609755.1 | turquoise   | 930.23 | 926.545 | 0.875623 | 0.051662 | 162.578 |
| gi 52351324 gb AY609756.1 | lightgreen  | 59.214 | 16.8703 | 0.99363  | 0.00061  | 2.168   |
| gi 52351346 gb AY609778.1 | yellow      | 184.3  | 79.6668 | 0.983685 | 0.002496 | 42.936  |
| gi 52351354 gb AY609784.1 | turquoise   | 102.92 | 77.2418 | 0.341133 | 0.574233 | 28.532  |
| gi 52351363 gb AY609793.1 | turquoise   | 1567.4 | 1566.99 | 0.999023 | 3.67E-05 | 5.722   |
| gi 52351368 gb AY609798.1 | yellow      | 304.84 | 55.7967 | 0.862171 | 0.060139 | 39.328  |
| gi 52351374 gb AY609804.1 | brown       | 242.12 | 120.91  | 0.981725 | 0.002958 | 3.918   |
| gi 52351397 gb AY609827.1 | blue        | 311.19 | 133.707 | 0.962486 | 0.008673 | 13.934  |
| gi 52351402 gb AY609832.1 | turquoise   | 1563.7 | 1563.31 | 0.999142 | 3.02E-05 | 5.944   |
| gi 52351406 gb AY609836.1 | grey60      | 249.49 | 32.7087 | 0.995222 | 0.000396 | 77.06   |
| gi 52351419 gb AY609849.1 | turquoise   | 485.4  | 470.591 | 0.707255 | 0.181556 | 98.418  |
| gi 52351429 gb AY609859.1 | turquoise   | 949.91 | 948.726 | 0.888285 | 0.044064 | 15.614  |
| gi 52351430 gb AY609860.1 | turquoise   | 1301.9 | 1300.68 | 0.958418 | 0.010115 | 151.146 |
| gi 52351432 gb AY609862.1 | turquoise   | 637.04 | 629.434 | 0.784052 | 0.116484 | 37.714  |
| gi 52351441 gb AY609871.1 | turquoise   | 1525.2 | 1524.69 | 0.993155 | 0.000679 | 20.07   |
| gi 52351444 gb AY609874.1 | turquoise   | 1462.9 | 1462.27 | 0.983773 | 0.002475 | 111.832 |
| gi 52351454 gb AY609884.1 | turquoise   | 216.93 | 185.288 | 0.476129 | 0.417528 | 85.632  |
| gi 52351457 gb AY609887.1 | yellow      | 290.31 | 67.2795 | 0.914145 | 0.029806 | 80.81   |
| gi 52351462 gb AY609892.1 | turquoise   | 302.4  | 287.733 | 0.605914 | 0.27875  | 68.854  |
| gi 52351490 gb AY609920.1 | turquoise   | 879.83 | 876.678 | 0.867217 | 0.056912 | 37.088  |
| gi 52351540 gb AY609970.1 | brown       | 317.08 | 88.6703 | 0.88538  | 0.045773 | 16.252  |
| gi 52351547 gb AY609977.1 | purple      | 201.76 | 33.8655 | 0.977436 | 0.004055 | 59.39   |
| gi 52351582 gb AY610012.1 | red         | 262.93 | 45.1388 | 0.960026 | 0.009536 | 32.22   |
| gi 52351587 gb AY610017.1 | turquoise   | 753.14 | 747.962 | 0.825974 | 0.084836 | 106.458 |
| gi 52351591 gb AY610021.1 | blue        | 281.3  | 131.399 | 0.957496 | 0.010452 | 54.354  |
| gi 52351593 gb AY610023.1 | turquoise   | 130.61 | 66.3076 | 0.259291 | 0.673598 | 147.776 |
| gi 52351594 gb AY610024.1 | blue        | 276.82 | 116.552 | 0.929675 | 0.02215  | 11.878  |
| gi 52351601 gb AY610031.1 | brown       | 310.26 | 96.085  | 0.908321 | 0.03286  | 9.224   |
| gi 52351606 gb AY610036.1 | turquoise   | 1423   | 1422.26 | 0.979337 | 0.003554 | 3.26    |
| gi 52351609 gb AY610039.1 | black       | 195.88 | 27.1286 | 0.870143 | 0.055066 | 69.476  |
| gi 52351619 gb AY610049.1 | turquoise   | 932.35 | 928.869 | 0.877782 | 0.05034  | 24.394  |

|                                |              |        |         |          |          |          |
|--------------------------------|--------------|--------|---------|----------|----------|----------|
| gi 52351620 gb AY610050.1      | turquoise    | 271.07 | 236.797 | 0.520189 | 0.368893 | 42.84    |
| gi 52351621 gb AY610051.1      | turquoise    | 421.42 | 413.142 | 0.6862   | 0.200786 | 66.024   |
| gi 52351639 gb AY610069.1      | navy         | 270.36 | 33.7009 | 0.992121 | 0.000838 | 23.358   |
| gi 52351640 gb AY610070.1      | turquoise    | 131.17 | 57.266  | 0.14116  | 0.820868 | 2.504    |
| gi 52351660 gb AY610090.1      | brown        | 223.61 | 126.978 | 0.995938 | 0.000311 | 7.032    |
| gi 52351676 gb AY610106.1      | grey60       | 245.2  | 31.9829 | 0.990024 | 0.001194 | 18.782   |
| gi 52351682 gb AY610112.1      | turquoise    | 1180.1 | 1178.44 | 0.936817 | 0.018883 | 22.098   |
| gi 52351696 gb AY610126.1      | turquoise    | 1558.2 | 1557.77 | 0.99851  | 6.90E-05 | 8.656    |
| gi 52351697 gb AY610127.1      | magenta      | 311.23 | 42.5603 | 0.98488  | 0.002227 | 153.516  |
| gi 52351701 gb AY610131.1      | turquoise    | 855.54 | 851.942 | 0.858473 | 0.062539 | 25.752   |
| gi 52351702 gb AY610132.1      | turquoise    | 838.75 | 836.516 | 0.850921 | 0.067531 | 54.798   |
| gi 52351717 gb AY610147.1      | brown        | 253    | 127.568 | 0.994235 | 0.000525 | 19.642   |
| gi 52351736 gb AY610166.1      | black        | 251.94 | 38.4073 | 0.979127 | 0.003609 | 139.796  |
| gi 52351755 gb AY610185.1      | brown        | 255.27 | 122.12  | 0.980627 | 0.003227 | 4.382    |
| gi 52351777 gb AY610207.1      | magenta      | 296.06 | 39.7295 | 0.968461 | 0.006692 | 27.448   |
| gi 52351803 gb AY610221.1      | turquoise    | 561.85 | 556.522 | 0.769481 | 0.128167 | 5.638    |
| gi 52351807 gb AY610225.1      | midnightblue | 229    | 34.9589 | 0.987409 | 0.001693 | 24.796   |
| gi 52351848 gb AY610266.1      | turquoise    | 1300   | 1299.3  | 0.95007  | 0.013292 | 23.414   |
| gi 52351862 gb AY610280.1      | turquoise    | 1480.4 | 1479.97 | 0.984021 | 0.002419 | 4.006    |
| gi 52351873 gb AY610291.1      | pink         | 281.19 | 39.9859 | 0.951254 | 0.012824 | 131.136  |
| gi 52351877 gb AY610295.1      | yellow       | 243.7  | 73.5987 | 0.946505 | 0.014733 | 146.912  |
| gi 52351890 gb AY610308.1      | turquoise    | 1033.4 | 1031.61 | 0.899321 | 0.037763 | 49.962   |
| gi 52351898 gb AY610316.1      | turquoise    | 1522   | 1521.47 | 0.992818 | 0.00073  | 4.306    |
| gi 52351905 gb AY610323.1      | lightyellow  | 310.33 | 25.2283 | 0.986571 | 0.001864 | 29.782   |
| gi 52351956 gb AY610374.1      | turquoise    | 1340.3 | 1339.49 | 0.966354 | 0.007371 | 43.476   |
| gi 52351961 gb AY610379.1      | turquoise    | 1329.1 | 1328.3  | 0.960468 | 0.009379 | 22.018   |
| gi 52351978 gb AY610394.1      | red          | 247.77 | 50.0307 | 0.985071 | 0.002185 | 133.056  |
| gi 52352028 gb AY610444.1      | turquoise    | 1533.8 | 1533.3  | 0.995118 | 0.000409 | 5.982    |
| gi 52352037 gb AY610453.1      | turquoise    | 1372.8 | 1371.83 | 0.970321 | 0.00611  | 8.722    |
| gi 52352038 gb AY610454.1      | turquoise    | 1134.5 | 1133.72 | 0.923809 | 0.024955 | 29.304   |
| gi 52352065 gb AY610481.1      | darkgreen    | 272.29 | 24.1384 | 0.997528 | 0.000148 | 6.062    |
| gi 52352069 gb AY610485.1      | turquoise    | 1418   | 1417.4  | 0.972688 | 0.005396 | 10.644   |
| gi 52352072 gb AY610488.1      | turquoise    | 1454.7 | 1453.93 | 0.983619 | 0.002511 | 16.418   |
| gi 52352707 gb AY609627.1      | turquoise    | 1402.3 | 1401.71 | 0.976495 | 0.004311 | 8.366    |
| gi 52352717 gb AY609637.1      | turquoise    | 624.87 | 615.458 | 0.773464 | 0.12494  | 19.198   |
| gi 52352721 gb AY609641.1      | turquoise    | 1532.9 | 1532.52 | 0.992931 | 0.000713 | 7.252    |
| gi 52352730 gb AY609650.1      | turquoise    | 1484.1 | 1483.6  | 0.986429 | 0.001894 | 27.258   |
| gi 54020965 ref NM_001005726.1 | turquoise    | 464.68 | 449.588 | 0.693803 | 0.193779 | 281.55   |
| gi 54607194 ref NM_001006592.1 | red          | 257.63 | 49.4895 | 0.982862 | 0.002686 | 4419.722 |
| gi 55741485 ref NM_213855.1    | grey         | 200.03 | 12.0369 | 0.805759 | 0.099717 | 623.904  |
| gi 55741489 ref NM_214136.1    | red          | 232.59 | 50.4905 | 0.989954 | 0.001207 | 18.784   |
| gi 55741720 ref NM_001001534.1 | black        | 291.56 | 40.9955 | 0.970331 | 0.006107 | 254.328  |
| gi 55741808 ref NM_213748.1    | blue         | 332.66 | 137.172 | 0.967766 | 0.006913 | 1382.118 |
| gi 55741810 ref NM_001001863.1 | pink         | 232.17 | 42.2908 | 0.971842 | 0.005648 | 1892.508 |
| gi 55741850 ref NM_001001264.1 | turquoise    | 1334   | 1332.89 | 0.962408 | 0.0087   | 0.69     |
| gi 55742741 ref NM_213920.1    | yellow       | 114.29 | 50.5924 | 0.845934 | 0.070892 | 1625.384 |
| gi 56199611 gb AY705447.1      | yellow       | 226.21 | 78.8899 | 0.982554 | 0.002759 | 14.028   |
| gi 56606056 ref NM_001008481.1 | turquoise    | 100.81 | 81.0352 | 0.348507 | 0.565421 | 23.296   |

|                                   |            |        |         |          |          |         |
|-----------------------------------|------------|--------|---------|----------|----------|---------|
| gi 56711365 ref NM_001008688.1    | black      | 197.96 | 28.6808 | 0.905181 | 0.034547 | 957.722 |
| gi 56792885 gb AY705918.1         | lightgreen | 85.761 | 7.50931 | 0.395867 | 0.509459 | 2.688   |
| gi 56792886 gb AY705919.1         | turquoise  | 1449.3 | 1448.67 | 0.979012 | 0.003639 | 6.262   |
| gi 57527981 ref NM_001009576.1    | turquoise  | 1538.6 | 1538.16 | 0.99405  | 0.00055  | 18.642  |
| gi 57528019 ref NM_001009581.1    | turquoise  | 1462.2 | 1461.46 | 0.983629 | 0.002508 | 12.954  |
| gi 57528034 ref NM_001009582.1    | purple     | 215.49 | 32.8456 | 0.976893 | 0.004202 | 493.376 |
| gi 58801554 ref NM_001011727.1    | turquoise  | 118.34 | 62.9596 | 0.230466 | 0.70918  | 35.666  |
| gi 59709497 ref NM_001012299.1    | turquoise  | 1553.6 | 1553.18 | 0.996528 | 0.000245 | 0.426   |
| gi 6007613 gb AF120099.1 AF120099 | turquoise  | 1440.2 | 1439.54 | 0.98229  | 0.002822 | 17.278  |
| gi 60097952 ref NM_001012406.1    | blue       | 314.89 | 141.836 | 0.974918 | 0.00475  | 14.59   |
| gi 61097882 ref NM_001012956.1    | turquoise  | 1496.1 | 1495.59 | 0.987823 | 0.00161  | 18.436  |
| gi 61696631 gb AY803094.1         | tan        | 299.26 | 39.5085 | 0.991574 | 0.000927 | 22.096  |
| gi 61696637 gb AY803100.1         | yellow     | 240.27 | 78.0741 | 0.97878  | 0.003699 | 24.432  |
| gi 61696660 gb AY803123.1         | turquoise  | 1553.6 | 1553.18 | 0.996528 | 0.000245 | 0.472   |
| gi 62082661 gb AY870324.1         | pink       | 152.78 | 36.4631 | 0.937513 | 0.018574 | 37.738  |
| gi 6581130 gb AF210153.1 AF210153 | turquoise  | 1193.1 | 1192.19 | 0.9317   | 0.021206 | 6.624   |
| gi 68534989 ref NM_001025224.1    | red        | 260.47 | 49.17   | 0.980943 | 0.003149 | 43.262  |
| gi 71834281 ref NM_214197.2       | brown      | 167.05 | 89.227  | 0.901399 | 0.036612 | 226.084 |
| gi 72535167 ref NM_001031778.1    | turquoise  | 1254.5 | 1253.19 | 0.950357 | 0.013178 | 17.822  |
| gi 72535177 ref NM_001031781.1    | turquoise  | 164.92 | 144.464 | 0.448372 | 0.448866 | 266.014 |
| gi 72535201 ref NM_001031794.1    | turquoise  | 370.85 | 362.9   | 0.648592 | 0.236438 | 517.742 |
| gi 73853881 ref NM_001032355.1    | turquoise  | 1406.7 | 1405.84 | 0.975312 | 0.004639 | 21.748  |
| gi 73853889 ref NM_001032359.1    | green      | 218.7  | 52.432  | 0.979222 | 0.003584 | 72.186  |
| gi 73853893 ref NM_001032358.1    | turquoise  | 1470.4 | 1469.94 | 0.985809 | 0.002025 | 23.64   |
| gi 74136760 ref NM_001033014.1    | yellow     | 140.22 | 65.2353 | 0.924755 | 0.024496 | 78.028  |
| gi 77628017 ref NM_001008689.2    | turquoise  | 477.98 | 470.969 | 0.72522  | 0.165595 | 31.612  |
| gi 77681320 dbj AB236885.1        | turquoise  | 1555.2 | 1554.77 | 0.996648 | 0.000233 | 11.03   |
| gi 77745211 gb DQ222847.1         | turquoise  | 1552.3 | 1551.88 | 0.99765  | 0.000137 | 8.078   |
| gi 80861404 ref NM_001037145.1    | turquoise  | 914.91 | 913.724 | 0.872015 | 0.053896 | 1.992   |
| gi 80971505 ref NM_001037147.1    | turquoise  | 1426   | 1425.5  | 0.975466 | 0.004596 | 2.91    |
| gi 82617535 ref NM_001037322.1    | brown      | 128.25 | 69.4764 | 0.844818 | 0.071651 | 32.914  |
| gi 83616153 gb DQ241739.1         | turquoise  | 1474.3 | 1473.86 | 0.984751 | 0.002255 | 4.758   |
| gi 83816988 ref NM_001037965.1    | turquoise  | 1506.5 | 1506.11 | 0.989234 | 0.001339 | 14.57   |
| gi 83921642 ref NM_001038007.1    | turquoise  | 1510   | 1509.39 | 0.99149  | 0.000941 | 222.13  |
| gi 84490428 ref NM_001038636.1    | turquoise  | 1508.2 | 1507.78 | 0.990504 | 0.001109 | 10.5    |
| gi 84490432 ref NM_001038631.1    | turquoise  | 178.95 | 163.794 | 0.48142  | 0.411614 | 6.488   |
| gi 84619523 ref NM_001038694.1    | turquoise  | 176.3  | 156.93  | 0.470032 | 0.424368 | 6.922   |
| gi 85838731 gb DQ351713.1         | turquoise  | 1351.3 | 1350.24 | 0.965312 | 0.007715 | 2.51    |
| gi 89886172 ref NM_001039748.1    | brown      | 106.2  | 40.9163 | 0.693094 | 0.194429 | 60.502  |
| gi 89886174 ref NM_001039749.1    | turquoise  | 1483.9 | 1483.19 | 0.988343 | 0.001508 | 9.4     |
| gi 90017493 ref NM_214184.2       | turquoise  | 244.99 | 229.763 | 0.569916 | 0.315821 | 269.218 |
| gi 91176934 gb DQ450676.1         | turquoise  | 1483.9 | 1483.46 | 0.986784 | 0.00182  | 6.728   |
| gi 92020093 dbj AB237777.1        | magenta    | 339.83 | 44.9817 | 0.995503 | 0.000362 | 62.462  |
| gi 9802381 gb AF281156.1 AF281156 | turquoise  | 1497.6 | 1497.15 | 0.987395 | 0.001696 | 5.012   |
| gnl UG Ssc#S14766801              | turquoise  | 1536.3 | 1535.92 | 0.994357 | 0.000508 | 1.772   |
| gnl UG Ssc#S14767272              | turquoise  | 1553.6 | 1553.18 | 0.996528 | 0.000245 | 1.086   |
| gnl UG Ssc#S15981094              | turquoise  | 1548   | 1547.52 | 0.99693  | 0.000204 | 6.672   |
| gnl UG Ssc#S15981318              | turquoise  | 1553.6 | 1553.18 | 0.996528 | 0.000245 | 1.228   |

|                      |               |        |         |          |          |         |
|----------------------|---------------|--------|---------|----------|----------|---------|
| gnl UG Ssc#S15981406 | turquoise     | 1553.6 | 1553.18 | 0.996528 | 0.000245 | 0.85    |
| gnl UG Ssc#S15981469 | turquoise     | 1565.7 | 1565.33 | 0.998457 | 7.27E-05 | 3.34    |
| gnl UG Ssc#S15981525 | darkgreen     | 238.82 | 22.9018 | 0.981044 | 0.003124 | 7.806   |
| gnl UG Ssc#S16350384 | turquoise     | 1566.7 | 1566.31 | 0.999232 | 2.55E-05 | 2.764   |
| gnl UG Ssc#S16350749 | turquoise     | 1555.8 | 1555.44 | 0.997316 | 0.000167 | 3.55    |
| gnl UG Ssc#S16444449 | grey          | 51.508 | 8.01581 | -0.0476  | 0.939411 | 17.834  |
| gnl UG Ssc#S16511729 | salmon        | 256.78 | 25.1143 | 0.923306 | 0.025201 | 152.936 |
| gnl UG Ssc#S16512910 | lightcyan     | 268.61 | 24.7687 | 0.983008 | 0.002652 | 9.376   |
| gnl UG Ssc#S16513514 | darkturquoise | 246.75 | 16.2254 | 0.965116 | 0.00778  | 14.128  |
| gnl UG Ssc#S16513635 | turquoise     | 1538.6 | 1538.15 | 0.99461  | 0.000475 | 1.98    |
| gnl UG Ssc#S16513921 | black         | 263.05 | 40.5245 | 0.977175 | 0.004125 | 30.448  |
| gnl UG Ssc#S16514147 | turquoise     | 932.74 | 929.492 | 0.879113 | 0.04953  | 9.798   |
| gnl UG Ssc#S16514640 | green         | 265.86 | 49.7022 | 0.95818  | 0.010202 | 38.518  |
| gnl UG Ssc#S16514775 | blue          | 270.8  | 132.256 | 0.958908 | 0.009937 | 57.216  |
| gnl UG Ssc#S16514926 | turquoise     | 1465.2 | 1464.76 | 0.981095 | 0.003111 | 1.182   |
| gnl UG Ssc#S16514958 | black         | 233.8  | 33.0854 | 0.944117 | 0.015724 | 344.932 |
| gnl UG Ssc#S16515033 | turquoise     | 484.71 | 479.806 | 0.718234 | 0.171752 | 28.26   |
| gnl UG Ssc#S16515706 | grey60        | 250.36 | 30.6843 | 0.981359 | 0.003047 | 27.284  |
| gnl UG Ssc#S16515995 | turquoise     | 1505.4 | 1505.02 | 0.988146 | 0.001547 | 5.046   |
| gnl UG Ssc#S16516579 | turquoise     | 833.39 | 830.278 | 0.850143 | 0.068052 | 4.342   |
| gnl UG Ssc#S16517655 | turquoise     | 1563.2 | 1562.81 | 0.998198 | 9.18E-05 | 14.338  |
| gnl UG Ssc#S16517726 | pink          | 198.63 | 46.1586 | 0.990942 | 0.001034 | 23.09   |
| gnl UG Ssc#S16518132 | black         | 105.88 | 9.51914 | 0.565553 | 0.320395 | 6.856   |
| gnl UG Ssc#S16761546 | turquoise     | 845.93 | 843.773 | 0.849732 | 0.068327 | 0.282   |
| gnl UG Ssc#S16761675 | turquoise     | 1567   | 1566.57 | 0.999188 | 2.78E-05 | 4.368   |
| gnl UG Ssc#S16763004 | red           | 200.03 | 49.5241 | 0.986068 | 0.00197  | 6.648   |
| gnl UG Ssc#S16763114 | blue          | 325.48 | 132.504 | 0.959279 | 0.009804 | 6.828   |
| gnl UG Ssc#S16763478 | navy          | 241.26 | 31.7696 | 0.980483 | 0.003263 | 21.422  |
| gnl UG Ssc#S16763868 | darkred       | 119.03 | 11.3595 | 0.856912 | 0.063561 | 15.358  |
| gnl UG Ssc#S16763939 | turquoise     | 1114.2 | 1112.95 | 0.912733 | 0.030538 | 43.312  |
| gnl UG Ssc#S16764113 | turquoise     | 1432.7 | 1431.94 | 0.979741 | 0.003451 | 44.752  |
| gnl UG Ssc#S16764287 | turquoise     | 1546.2 | 1545.83 | 0.994852 | 0.000443 | 3.242   |
| gnl UG Ssc#S16764576 | turquoise     | 1442.2 | 1441.68 | 0.976253 | 0.004377 | 2.99    |
| gnl UG Ssc#S16764603 | turquoise     | 1519.4 | 1518.9  | 0.992941 | 0.000711 | 4.4     |
| gnl UG Ssc#S16765575 | turquoise     | 1553.6 | 1553.18 | 0.996528 | 0.000245 | 0.142   |
| gnl UG Ssc#S16766234 | brown         | 219.55 | 106.212 | 0.949717 | 0.013433 | 7.026   |
| gnl UG Ssc#S16767076 | turquoise     | 113.75 | 86.7592 | 0.322274 | 0.596886 | 50.542  |
| gnl UG Ssc#S16767178 | blue          | 286.52 | 141.46  | 0.974492 | 0.004872 | 8.364   |
| gnl UG Ssc#S16769298 | turquoise     | 1568.1 | 1567.71 | 0.999478 | 1.43E-05 | 2.816   |
| gnl UG Ssc#S16769299 | turquoise     | 1449.3 | 1448.55 | 0.98284  | 0.002691 | 23.216  |
| gnl UG Ssc#S16769740 | lightgreen    | 48.028 | 12.7203 | 0.846245 | 0.070681 | 13.53   |
| gnl UG Ssc#S16769741 | turquoise     | 192.48 | 167.455 | 0.467781 | 0.4269   | 29.752  |
| gnl UG Ssc#S16769794 | turquoise     | 1115.5 | 1113.86 | 0.920946 | 0.026364 | 1.156   |
| gnl UG Ssc#S16769802 | turquoise     | 1553.6 | 1553.18 | 0.996528 | 0.000245 | 1.464   |
| gnl UG Ssc#S16770187 | turquoise     | 1261.9 | 1260.76 | 0.952969 | 0.012157 | 52.768  |
| gnl UG Ssc#S17499549 | turquoise     | 1015.6 | 1014.31 | 0.890365 | 0.042853 | 5.582   |
| gnl UG Ssc#S17499579 | green         | 137.69 | 39.866  | 0.909731 | 0.032112 | 64.37   |
| gnl UG Ssc#S17499681 | turquoise     | 347.83 | 339.178 | 0.641929 | 0.242919 | 171.194 |

|                      |              |        |         |          |          |         |
|----------------------|--------------|--------|---------|----------|----------|---------|
| gnl UG Ssc#S17500019 | turquoise    | 1529.7 | 1529.17 | 0.994359 | 0.000508 | 3.416   |
| gnl UG Ssc#S17500067 | turquoise    | 1502.4 | 1501.89 | 0.989096 | 0.001365 | 1.714   |
| gnl UG Ssc#S17500137 | turquoise    | 1551.1 | 1550.6  | 0.996856 | 0.000212 | 3.958   |
| gnl UG Ssc#S17501425 | brown        | 251.37 | 111.111 | 0.963054 | 0.008477 | 13.128  |
| gnl UG Ssc#S17503526 | turquoise    | 1531.2 | 1530.68 | 0.994663 | 0.000468 | 19.538  |
| gnl UG Ssc#S17503531 | turquoise    | 1543.4 | 1542.97 | 0.996545 | 0.000244 | 0.604   |
| gnl UG Ssc#S17503771 | turquoise    | 1541.1 | 1540.74 | 0.995062 | 0.000416 | 15.174  |
| gnl UG Ssc#S17503882 | turquoise    | 1316.6 | 1315.55 | 0.956355 | 0.010873 | 31.748  |
| gnl UG Ssc#S17504469 | turquoise    | 1421.5 | 1421.03 | 0.973638 | 0.005118 | 9.726   |
| gnl UG Ssc#S17505417 | turquoise    | 1420.8 | 1420.21 | 0.975235 | 0.004661 | 5.822   |
| gnl UG Ssc#S17506191 | purple       | 233.71 | 34.4261 | 0.986358 | 0.001909 | 49.954  |
| gnl UG Ssc#S17509834 | turquoise    | 1570.4 | 1570.02 | 0.999449 | 1.55E-05 | 1.596   |
| gnl UG Ssc#S17509854 | yellow       | 225.98 | 49.9927 | 0.824858 | 0.085638 | 36.682  |
| gnl UG Ssc#S17509886 | grey         | 287.83 | 16.6552 | 0.964174 | 0.008096 | 297.692 |
| gnl UG Ssc#S17509925 | turquoise    | 1531.1 | 1530.75 | 0.992671 | 0.000752 | 13.808  |
| gnl UG Ssc#S17509934 | yellow       | 288.81 | 59.1083 | 0.875966 | 0.051451 | 18.31   |
| gnl UG Ssc#S17510046 | turquoise    | 1514.7 | 1514.34 | 0.989358 | 0.001316 | 13.126  |
| gnl UG Ssc#S17510077 | greenyellow  | 235.07 | 20.2303 | 0.938163 | 0.018287 | 40.664  |
| gnl UG Ssc#S17510145 | turquoise    | 1519.5 | 1518.98 | 0.992033 | 0.000853 | 6.312   |
| gnl UG Ssc#S17510233 | yellow       | 211.78 | 59.6649 | 0.908696 | 0.032661 | 119.288 |
| gnl UG Ssc#S17510300 | turquoise    | 1571.1 | 1570.75 | 0.999627 | 8.66E-06 | 1.406   |
| gnl UG Ssc#S17510311 | turquoise    | 1377   | 1376.02 | 0.971785 | 0.005665 | 20.1    |
| gnl UG Ssc#S17510396 | turquoise    | 544.66 | 536.379 | 0.753983 | 0.14095  | 103.442 |
| gnl UG Ssc#S17510398 | salmon       | 168.8  | 29.8734 | 0.980698 | 0.00321  | 361.384 |
| gnl UG Ssc#S17510408 | turquoise    | 1547.3 | 1546.83 | 0.995358 | 0.000379 | 14.988  |
| gnl UG Ssc#S17510469 | turquoise    | 1285.9 | 1285.17 | 0.950588 | 0.013087 | 6.234   |
| gnl UG Ssc#S17510489 | turquoise    | 1333.7 | 1332.79 | 0.964003 | 0.008154 | 30.71   |
| gnl UG Ssc#S17510525 | turquoise    | 719.75 | 716.713 | 0.806934 | 0.098832 | 34.826  |
| gnl UG Ssc#S17510588 | turquoise    | 1455.6 | 1454.99 | 0.984471 | 0.002318 | 5.272   |
| gnl UG Ssc#S17510601 | turquoise    | 818.19 | 814.753 | 0.854751 | 0.064984 | 15.808  |
| gnl UG Ssc#S17510736 | turquoise    | 146.58 | 60.941  | 0.181272 | 0.770468 | 17.33   |
| gnl UG Ssc#S17510761 | turquoise    | 1566.9 | 1566.48 | 0.998729 | 5.44E-05 | 3.904   |
| gnl UG Ssc#S17510766 | turquoise    | 207.75 | 166.367 | 0.452167 | 0.444552 | 23.298  |
| gnl UG Ssc#S17510781 | lightgreen   | 54.774 | 15.4019 | 0.912191 | 0.03082  | 3.588   |
| gnl UG Ssc#S17510796 | brown        | 224.41 | 112.289 | 0.965611 | 0.007616 | 10.612  |
| gnl UG Ssc#S17510986 | midnightblue | 251.82 | 36.1917 | 0.994091 | 0.000545 | 524.668 |
| gnl UG Ssc#S17511034 | turquoise    | 1500.7 | 1500.3  | 0.987992 | 0.001577 | 10.178  |
| gnl UG Ssc#S17511213 | turquoise    | 1359   | 1358.53 | 0.962343 | 0.008722 | 8.184   |
| gnl UG Ssc#S17511222 | brown        | 317.26 | 89.1831 | 0.887553 | 0.044493 | 7.762   |
| gnl UG Ssc#S17511240 | turquoise    | 253.94 | 214.403 | 0.504613 | 0.385924 | 86.772  |
| gnl UG Ssc#S17511285 | green        | 251.2  | 53.3132 | 0.987261 | 0.001723 | 314.614 |
| gnl UG Ssc#S17511386 | navy         | 253.95 | 31.8617 | 0.979461 | 0.003523 | 101.386 |
| gnl UG Ssc#S17511415 | turquoise    | 1553.6 | 1553.18 | 0.996528 | 0.000245 | 0.284   |
| gnl UG Ssc#S17511419 | pink         | 182.46 | 43.0254 | 0.975206 | 0.004669 | 24.436  |
| gnl UG Ssc#S17511420 | turquoise    | 433.45 | 416.994 | 0.680883 | 0.205727 | 19.134  |
| gnl UG Ssc#S17511439 | blue         | 301.21 | 150.263 | 0.987691 | 0.001636 | 51.878  |
| gnl UG Ssc#S17511660 | brown        | 279.56 | 117.322 | 0.970932 | 0.005923 | 6.566   |
| gnl UG Ssc#S17511723 | grey60       | 218.82 | 30.8415 | 0.982909 | 0.002675 | 39.716  |

|                      |              |        |         |          |          |         |
|----------------------|--------------|--------|---------|----------|----------|---------|
| gnl UG Ssc#S17511731 | yellow       | 255.75 | 83.2955 | 0.990808 | 0.001056 | 14.242  |
| gnl UG Ssc#S17511815 | blue         | 340.92 | 140.001 | 0.971228 | 0.005833 | 4.58    |
| gnl UG Ssc#S17511884 | turquoise    | 866.73 | 864.944 | 0.856529 | 0.063813 | 8.978   |
| gnl UG Ssc#S17511887 | blue         | 253.18 | 118.477 | 0.93429  | 0.02002  | 32.114  |
| gnl UG Ssc#S17511933 | turquoise    | 1333.8 | 1332.99 | 0.961258 | 0.009101 | 10.034  |
| gnl UG Ssc#S17512154 | midnightblue | 269.14 | 34.1567 | 0.981434 | 0.003028 | 54.326  |
| gnl UG Ssc#S17512186 | turquoise    | 930.59 | 927.806 | 0.879817 | 0.049103 | 28.676  |
| gnl UG Ssc#S17512211 | brown        | 253.55 | 110.629 | 0.95644  | 0.010842 | 3.59    |
| gnl UG Ssc#S17512237 | brown        | 267.73 | 126.237 | 0.988552 | 0.001468 | 20.406  |
| gnl UG Ssc#S17512262 | turquoise    | 576.04 | 564.611 | 0.750932 | 0.143509 | 14.928  |
| gnl UG Ssc#S17512269 | royalblue    | 209.67 | 26.5279 | 0.998832 | 4.79E-05 | 77.53   |
| gnl UG Ssc#S17512292 | purple       | 144.14 | 23.096  | 0.888325 | 0.044041 | 26.49   |
| gnl UG Ssc#S17512305 | tan          | 266.47 | 35.293  | 0.967599 | 0.006967 | 10.552  |
| gnl UG Ssc#S17513098 | pink         | 211.06 | 36.0105 | 0.932879 | 0.020663 | 43.826  |
| gnl UG Ssc#S17513113 | brown        | 275.3  | 126.425 | 0.988537 | 0.001471 | 49.36   |
| gnl UG Ssc#S17513155 | turquoise    | 1553.6 | 1553.18 | 0.996528 | 0.000245 | 0.094   |
| gnl UG Ssc#S17513253 | darkred      | 70.027 | 13.9113 | 0.986217 | 0.001938 | 62.414  |
| gnl UG Ssc#S17513449 | turquoise    | 1081   | 1079.26 | 0.918075 | 0.0278   | 351.302 |
| gnl UG Ssc#S17513547 | turquoise    | 1525.4 | 1524.91 | 0.992924 | 0.000714 | 2.39    |
| gnl UG Ssc#S17513694 | blue         | 343.94 | 122.175 | 0.940496 | 0.017268 | 21.796  |
| gnl UG Ssc#S17513789 | turquoise    | 1554.9 | 1554.5  | 0.99782  | 0.000122 | 8.042   |
| gnl UG Ssc#S17513836 | turquoise    | 273.84 | 268.957 | 0.611196 | 0.273413 | 38.17   |
| gnl UG Ssc#S17513916 | turquoise    | 1554.9 | 1554.5  | 0.996742 | 0.000223 | 30.222  |
| gnl UG Ssc#S17513958 | grey         | 249.36 | 15.4768 | 0.926707 | 0.023556 | 41.502  |
| gnl UG Ssc#S17513979 | navy         | 283.93 | 28.2912 | 0.945555 | 0.015125 | 30.55   |
| gnl UG Ssc#S17514217 | turquoise    | 1054.1 | 1052.06 | 0.903377 | 0.035527 | 11.44   |
| gnl UG Ssc#S17514245 | darkgreen    | 325.58 | 21.0836 | 0.976839 | 0.004217 | 34.842  |
| gnl UG Ssc#S17514318 | greenyellow  | 91.276 | 6.74249 | -0.45223 | 0.444481 | 48.384  |
| gnl UG Ssc#S17514325 | yellow       | 84.336 | 30.975  | 0.727072 | 0.163974 | 35.792  |
| gnl UG Ssc#S17514578 | purple       | 97.521 | 9.50374 | 0.672393 | 0.213687 | 20.052  |
| gnl UG Ssc#S17514582 | turquoise    | 1553.6 | 1553.18 | 0.996528 | 0.000245 | 6.754   |
| gnl UG Ssc#S17514632 | turquoise    | 125.11 | 93.4322 | 0.337819 | 0.578202 | 11.43   |
| gnl UG Ssc#S17514665 | turquoise    | 1553.6 | 1553.18 | 0.996528 | 0.000245 | 0.142   |
| gnl UG Ssc#S17514667 | blue         | 307.34 | 145.739 | 0.981076 | 0.003116 | 23.448  |
| gnl UG Ssc#S17514753 | turquoise    | 1425.4 | 1424.6  | 0.977703 | 0.003983 | 19.196  |
| gnl UG Ssc#S17515039 | yellow       | 117.99 | 51.5705 | 0.846891 | 0.070242 | 111.258 |
| gnl UG Ssc#S17515082 | turquoise    | 1553.6 | 1553.18 | 0.996528 | 0.000245 | 1.558   |
| gnl UG Ssc#S17515091 | turquoise    | 1552.8 | 1552.41 | 0.995913 | 0.000313 | 3.3     |
| gnl UG Ssc#S17515316 | turquoise    | 1444.7 | 1444.04 | 0.980256 | 0.00332  | 54.976  |
| gnl UG Ssc#S17515524 | turquoise    | 188.29 | 104.154 | 0.281885 | 0.645904 | 3.854   |
| gnl UG Ssc#S17515611 | turquoise    | 1394.3 | 1393.59 | 0.974728 | 0.004805 | 119.022 |
| gnl UG Ssc#S17515701 | turquoise    | 1484.1 | 1483.69 | 0.985105 | 0.002177 | 14.356  |
| gnl UG Ssc#S17515754 | turquoise    | 189.16 | 102.829 | 0.262129 | 0.670109 | 23.876  |
| gnl UG Ssc#S17515809 | brown        | 156.14 | 84.0897 | 0.904197 | 0.03508  | 56.766  |
| gnl UG Ssc#S17515842 | turquoise    | 1180.8 | 1179.34 | 0.932338 | 0.020912 | 11.334  |
| gnl UG Ssc#S17515868 | turquoise    | 1392.3 | 1391.75 | 0.967689 | 0.006938 | 6.112   |
| gnl UG Ssc#S17515869 | turquoise    | 128    | 105.344 | 0.3878   | 0.518909 | 4.462   |
| gnl UG Ssc#S17516031 | turquoise    | 465.33 | 453.148 | 0.710498 | 0.178645 | 7.858   |



|                      |           |        |         |          |          |         |
|----------------------|-----------|--------|---------|----------|----------|---------|
| gnl UG Ssc#S17516064 | turquoise | 1446.4 | 1445.92 | 0.977729 | 0.003976 | 9.36    |
| gnl UG Ssc#S17516095 | magenta   | 332.22 | 41.4372 | 0.979026 | 0.003635 | 22.31   |
| gnl UG Ssc#S17516151 | turquoise | 637.48 | 635.166 | 0.792719 | 0.109695 | 5.744   |
| gnl UG Ssc#S17516197 | turquoise | 1553.6 | 1553.18 | 0.996528 | 0.000245 | 0.566   |
| gnl UG Ssc#S17516311 | pink      | 283.69 | 38.8898 | 0.944982 | 0.015363 | 218.222 |
| gnl UG Ssc#S17516362 | turquoise | 273.54 | 236.938 | 0.525039 | 0.363629 | 17.584  |
| gnl UG Ssc#S17516571 | turquoise | 1493   | 1492.47 | 0.987529 | 0.001669 | 3.124   |
| gnl UG Ssc#S17516685 | turquoise | 1533.6 | 1533.16 | 0.994768 | 0.000454 | 5.452   |
| gnl UG Ssc#S17516715 | turquoise | 893.24 | 890.457 | 0.869123 | 0.055707 | 1.112   |
| gnl UG Ssc#S17516828 | grey60    | 171.06 | 22.3838 | 0.911759 | 0.031046 | 145.872 |
| gnl UG Ssc#S17516917 | turquoise | 1396.1 | 1395.15 | 0.973083 | 0.00528  | 45.374  |
| gnl UG Ssc#S17516920 | red       | 272.55 | 45.2479 | 0.960496 | 0.009369 | 19.284  |
| gnl UG Ssc#S17516962 | turquoise | 1505.7 | 1505.29 | 0.987605 | 0.001654 | 2.596   |
| gnl UG Ssc#S17517004 | magenta   | 327.13 | 43.5433 | 0.988845 | 0.001412 | 25.662  |
| gnl UG Ssc#S17517257 | turquoise | 1319.9 | 1319.23 | 0.956003 | 0.011005 | 3.708   |
| gnl UG Ssc#S17517303 | turquoise | 1436.5 | 1435.97 | 0.975363 | 0.004625 | 2.184   |
| gnl UG Ssc#S17517405 | magenta   | 329    | 44.189  | 0.991979 | 0.000861 | 28.704  |
| gnl UG Ssc#S17517598 | blue      | 274.26 | 133.093 | 0.959626 | 0.009679 | 11.862  |
| gnl UG Ssc#S17517636 | turquoise | 1553.6 | 1553.18 | 0.996528 | 0.000245 | 6.754   |
| gnl UG Ssc#S17517701 | turquoise | 1478.9 | 1478.48 | 0.983762 | 0.002478 | 3.372   |
| gnl UG Ssc#S17517714 | turquoise | 1494.1 | 1493.68 | 0.986388 | 0.001903 | 12.938  |
| gnl UG Ssc#S17517759 | turquoise | 1502.9 | 1502.51 | 0.9893   | 0.001326 | 8.948   |
| gnl UG Ssc#S17517764 | salmon    | 97.123 | 23.3753 | 0.920031 | 0.026819 | 4.482   |
| gnl UG Ssc#S17517969 | green     | 78.956 | 22.3756 | 0.77379  | 0.124677 | 1.124   |
| gnl UG Ssc#S17518103 | turquoise | 1452.4 | 1451.79 | 0.979601 | 0.003487 | 24.538  |
| gnl UG Ssc#S17518104 | turquoise | 1453.9 | 1453.3  | 0.979147 | 0.003603 | 19.118  |
| gnl UG Ssc#S17518115 | pink      | 206.46 | 42.1312 | 0.971888 | 0.005634 | 95.858  |
| gnl UG Ssc#S17518307 | darkred   | 63.788 | 13.8455 | 0.988083 | 0.001559 | 37.442  |
| gnl UG Ssc#S17518379 | turquoise | 1417.2 | 1416.46 | 0.973482 | 0.005163 | 4.422   |
| gnl UG Ssc#S17518385 | yellow    | 309.7  | 66.0547 | 0.915879 | 0.028915 | 5.456   |
| gnl UG Ssc#S17518466 | turquoise | 1412.4 | 1411.69 | 0.974919 | 0.00475  | 2.66    |
| gnl UG Ssc#S17518565 | grey      | 316.31 | 16.6497 | 0.948986 | 0.013725 | 17.95   |
| gnl UG Ssc#S17518685 | turquoise | 1570.4 | 1570.02 | 0.999449 | 1.55E-05 | 1.596   |
| gnl UG Ssc#S17518691 | turquoise | 563.01 | 552.919 | 0.753879 | 0.141038 | 5.262   |
| gnl UG Ssc#S17518692 | turquoise | 1570.6 | 1570.24 | 0.99978  | 3.92E-06 | 2.106   |
| gnl UG Ssc#S17518758 | turquoise | 1100.7 | 1099.91 | 0.922963 | 0.025369 | 4.828   |
| gnl UG Ssc#S17518793 | turquoise | 1535.3 | 1534.85 | 0.993238 | 0.000667 | 14.174  |
| gnl UG Ssc#S17518795 | navy      | 285.07 | 31.2539 | 0.973912 | 0.005038 | 57.868  |
| gnl UG Ssc#S17518818 | turquoise | 1336.4 | 1335.57 | 0.961977 | 0.008849 | 1.496   |
| gnl UG Ssc#S17518997 | turquoise | 862.91 | 861.595 | 0.862094 | 0.060188 | 12.252  |
| gnl UG Ssc#S17519017 | turquoise | 1492.9 | 1492.34 | 0.988856 | 0.00141  | 75.96   |
| gnl UG Ssc#S17524473 | green     | 215.63 | 50.5834 | 0.969286 | 0.006432 | 22.06   |
| gnl UG Ssc#S17524578 | red       | 264.11 | 48.03   | 0.974638 | 0.00483  | 3.078   |
| gnl UG Ssc#S17524628 | turquoise | 1571.4 | 1571    | 0.999719 | 5.67E-06 | 1.97    |
| gnl UG Ssc#S17524702 | turquoise | 1057.4 | 1056.32 | 0.910737 | 0.031582 | 33.454  |
| gnl UG Ssc#S17524908 | turquoise | 1516.5 | 1515.95 | 0.991927 | 0.00087  | 7.016   |
| gnl UG Ssc#S17524953 | turquoise | 36.406 | 29.1853 | 0.211685 | 0.732501 | 88.892  |
| gnl UG Ssc#S17524983 | turquoise | 157.26 | 123.277 | 0.427589 | 0.472654 | 17.956  |

|                      |               |        |         |          |          |         |
|----------------------|---------------|--------|---------|----------|----------|---------|
| gnl UG Ssc#S17524990 | turquoise     | 1446.5 | 1446.03 | 0.980356 | 0.003295 | 14.064  |
| gnl UG Ssc#S17525025 | turquoise     | 1278.7 | 1277.45 | 0.952098 | 0.012495 | 5.486   |
| gnl UG Ssc#S17525035 | turquoise     | 130.53 | 62.5334 | 0.242127 | 0.694754 | 22.496  |
| gnl UG Ssc#S17525079 | turquoise     | 1550.9 | 1550.52 | 0.996804 | 0.000217 | 1.888   |
| gnl UG Ssc#S17525080 | turquoise     | 1499   | 1498.57 | 0.987858 | 0.001603 | 10.928  |
| gnl UG Ssc#S17525104 | turquoise     | 158.92 | 137.053 | 0.449577 | 0.447495 | 33.57   |
| gnl UG Ssc#S17525130 | blue          | 298.12 | 133.446 | 0.961802 | 0.00891  | 53.276  |
| gnl UG Ssc#S17525225 | turquoise     | 1455.3 | 1454.6  | 0.982426 | 0.002789 | 14.698  |
| gnl UG Ssc#S17525302 | turquoise     | 1158.8 | 1157.31 | 0.931134 | 0.021469 | 1.79    |
| gnl UG Ssc#S17525376 | brown         | 250.12 | 83.9752 | 0.897254 | 0.03892  | 85.17   |
| gnl UG Ssc#S17525410 | magenta       | 328.15 | 44.6688 | 0.994994 | 0.000425 | 29.984  |
| gnl UG Ssc#S17525473 | turquoise     | 1372.8 | 1371.95 | 0.968617 | 0.006642 | 10.158  |
| gnl UG Ssc#S17525713 | turquoise     | 1502.7 | 1502.22 | 0.989111 | 0.001362 | 6.732   |
| gnl UG Ssc#S17525753 | turquoise     | 1546.1 | 1545.67 | 0.996173 | 0.000284 | 25.154  |
| gnl UG Ssc#S17525768 | turquoise     | 1548.7 | 1548.28 | 0.996053 | 0.000297 | 6.912   |
| gnl UG Ssc#S17525783 | turquoise     | 1082.7 | 1081.95 | 0.918446 | 0.027613 | 1.196   |
| gnl UG Ssc#S17525847 | purple        | 196.49 | 28.879  | 0.940366 | 0.017324 | 3.54    |
| gnl UG Ssc#S17525865 | turquoise     | 1031.1 | 1029.41 | 0.897634 | 0.038707 | 30.614  |
| gnl UG Ssc#S17525951 | turquoise     | 1479.1 | 1478.63 | 0.984875 | 0.002228 | 19.5    |
| gnl UG Ssc#S17526090 | turquoise     | 1489.5 | 1488.93 | 0.987903 | 0.001594 | 1.398   |
| gnl UG Ssc#S17526093 | turquoise     | 893.07 | 890.166 | 0.868821 | 0.055898 | 24.872  |
| gnl UG Ssc#S17526150 | tan           | 341.68 | 36.0508 | 0.969841 | 0.006259 | 13.634  |
| gnl UG Ssc#S17526185 | blue          | 340.05 | 157.407 | 0.998373 | 7.88E-05 | 5.376   |
| gnl UG Ssc#S17526193 | turquoise     | 701.16 | 698.986 | 0.827803 | 0.083526 | 11.546  |
| gnl UG Ssc#S17526265 | turquoise     | 1451.3 | 1450.63 | 0.981909 | 0.002913 | 14.828  |
| gnl UG Ssc#S17526422 | black         | 294.03 | 41.8671 | 0.987274 | 0.00172  | 24.954  |
| gnl UG Ssc#S17526634 | black         | 293.58 | 41.8276 | 0.986495 | 0.00188  | 48.616  |
| gnl UG Ssc#S17526742 | darkturquoise | 201.74 | 17.8388 | 0.995664 | 0.000343 | 19.82   |
| gnl UG Ssc#S17526834 | turquoise     | 132.08 | 110.768 | 0.395187 | 0.510254 | 112.632 |
| gnl UG Ssc#S17526874 | red           | 269.84 | 44.9408 | 0.95819  | 0.010198 | 86.93   |
| gnl UG Ssc#S17526922 | greenyellow   | 238.5  | 19.9197 | 0.971892 | 0.005633 | 15.478  |
| gnl UG Ssc#S17526927 | magenta       | 305.23 | 41.0935 | 0.976571 | 0.00429  | 10.1    |
| gnl UG Ssc#S17526940 | turquoise     | 1168.1 | 1167.21 | 0.928002 | 0.022939 | 10.754  |
| gnl UG Ssc#S17526944 | turquoise     | 1553.6 | 1553.18 | 0.996528 | 0.000245 | 3.402   |
| gnl UG Ssc#S17526987 | purple        | 192.15 | 32.7691 | 0.974367 | 0.004908 | 37.834  |
| gnl UG Ssc#S17527052 | turquoise     | 425.88 | 416.992 | 0.703703 | 0.184762 | 25.418  |
| gnl UG Ssc#S17527330 | navy          | 186.89 | 27.1289 | 0.944775 | 0.015449 | 25.896  |
| gnl UG Ssc#S17527438 | grey60        | 192.86 | 27.4843 | 0.957946 | 0.010287 | 64.762  |
| gnl UG Ssc#S17527442 | brown         | 215.82 | 120.23  | 0.983607 | 0.002513 | 8.224   |
| gnl UG Ssc#S17527454 | brown         | 216.23 | 106.562 | 0.95415  | 0.011704 | 15.692  |
| gnl UG Ssc#S18260201 | turquoise     | 1480.4 | 1479.94 | 0.987626 | 0.001649 | 6.836   |
| gnl UG Ssc#S18260225 | turquoise     | 1134.6 | 1132.96 | 0.927092 | 0.023371 | 18.34   |
| gnl UG Ssc#S18260863 | purple        | 78.255 | 9.97264 | 0.693788 | 0.193792 | 8.06    |
| gnl UG Ssc#S18261767 | turquoise     | 1277   | 1276.46 | 0.952367 | 0.01239  | 6.83    |
| gnl UG Ssc#S18262171 | blue          | 273.01 | 133.044 | 0.960075 | 0.009519 | 26.126  |
| gnl UG Ssc#S18262357 | turquoise     | 1513.7 | 1513.14 | 0.992807 | 0.000732 | 6.498   |
| gnl UG Ssc#S18263529 | green         | 166.2  | 48.2064 | 0.974131 | 0.004975 | 27.542  |
| gnl UG Ssc#S18263925 | brown         | 256.85 | 128.589 | 0.995313 | 0.000385 | 6.596   |

|                      |           |        |         |          |          |         |
|----------------------|-----------|--------|---------|----------|----------|---------|
| gnl UG Ssc#S18264158 | turquoise | 1229.4 | 1228.62 | 0.941041 | 0.017033 | 5.594   |
| gnl UG Ssc#S18267174 | turquoise | 1537.1 | 1536.72 | 0.993282 | 0.00066  | 43.168  |
| gnl UG Ssc#S18267480 | turquoise | 1538.4 | 1538.03 | 0.994226 | 0.000526 | 9.98    |
| gnl UG Ssc#S18267647 | turquoise | 447.1  | 439.364 | 0.705346 | 0.183277 | 55.516  |
| gnl UG Ssc#S18268289 | turquoise | 1329.4 | 1328.73 | 0.95767  | 0.010388 | 3.614   |
| gnl UG Ssc#S18268314 | turquoise | 1566.9 | 1566.56 | 0.998779 | 5.12E-05 | 3.624   |
| gnl UG Ssc#S18268722 | turquoise | 1463.3 | 1462.59 | 0.984879 | 0.002227 | 7.12    |
| gnl UG Ssc#S18269927 | turquoise | 1560.2 | 1559.8  | 0.998631 | 6.08E-05 | 6.348   |
| gnl UG Ssc#S18270450 | turquoise | 1456   | 1455.28 | 0.982079 | 0.002872 | 2.184   |
| gnl UG Ssc#S18271608 | turquoise | 991.98 | 989.643 | 0.89302  | 0.041323 | 15.64   |
| gnl UG Ssc#S18272408 | turquoise | 1570.9 | 1570.54 | 0.999793 | 3.56E-06 | 2.716   |
| gnl UG Ssc#S18272610 | turquoise | 127.71 | 105.672 | 0.384304 | 0.523015 | 1.758   |
| gnl UG Ssc#S18272798 | turquoise | 358.94 | 356.228 | 0.684177 | 0.202662 | 11.88   |
| gnl UG Ssc#S18273087 | turquoise | 1401   | 1400.19 | 0.974903 | 0.004755 | 4.858   |
| gnl UG Ssc#S18274097 | turquoise | 1492.3 | 1491.73 | 0.989108 | 0.001362 | 54.598  |
| gnl UG Ssc#S18274130 | turquoise | 1349.2 | 1348.55 | 0.966833 | 0.007215 | 3.376   |
| gnl UG Ssc#S18274330 | turquoise | 749.83 | 745.335 | 0.830392 | 0.081683 | 4.604   |
| gnl UG Ssc#S18275000 | turquoise | 1507.3 | 1506.78 | 0.990395 | 0.001128 | 16.57   |
| gnl UG Ssc#S18276175 | turquoise | 1248.2 | 1247.47 | 0.940055 | 0.017459 | 5.88    |
| gnl UG Ssc#S18276682 | tan       | 231.79 | 25.6934 | 0.898    | 0.038502 | 9.668   |
| gnl UG Ssc#S18276715 | turquoise | 1566.3 | 1565.85 | 0.999156 | 2.94E-05 | 14.914  |
| gnl UG Ssc#S18277539 | blue      | 260.21 | 128.769 | 0.9526   | 0.0123   | 135.15  |
| gnl UG Ssc#S18278819 | turquoise | 1504.5 | 1504.05 | 0.989926 | 0.001212 | 1.766   |
| gnl UG Ssc#S18279395 | turquoise | 1565   | 1564.6  | 0.998386 | 7.78E-05 | 9.334   |
| gnl UG Ssc#S18279557 | turquoise | 1542   | 1541.54 | 0.995848 | 0.000321 | 5.706   |
| gnl UG Ssc#S18281053 | turquoise | 1523.8 | 1523.33 | 0.993089 | 0.000689 | 65.68   |
| gnl UG Ssc#S18282381 | salmon    | 227.82 | 29.6306 | 0.973622 | 0.005122 | 89.302  |
| gnl UG Ssc#S18282485 | turquoise | 1530.3 | 1529.84 | 0.992875 | 0.000721 | 2.484   |
| gnl UG Ssc#S18283093 | turquoise | 1409.1 | 1408.47 | 0.971086 | 0.005876 | 21.354  |
| gnl UG Ssc#S18283235 | green     | 74.389 | 15.7727 | 0.67104  | 0.214963 | 17.418  |
| gnl UG Ssc#S18284050 | turquoise | 1362.6 | 1362.02 | 0.969886 | 0.006245 | 14.026  |
| gnl UG Ssc#S18284292 | turquoise | 1567.6 | 1567.25 | 0.998921 | 4.26E-05 | 6.332   |
| gnl UG Ssc#S18284609 | tan       | 292.17 | 35.4095 | 0.966546 | 0.007308 | 10.772  |
| gnl UG Ssc#S18284670 | turquoise | 1541.1 | 1540.69 | 0.993831 | 0.000581 | 6.106   |
| gnl UG Ssc#S18284924 | turquoise | 1291.7 | 1291.08 | 0.950698 | 0.013043 | 4.036   |
| gnl UG Ssc#S18289737 | turquoise | 1564.9 | 1564.47 | 0.999121 | 3.13E-05 | 9.096   |
| gnl UG Ssc#S18290449 | royalblue | 188.93 | 24.9175 | 0.985969 | 0.001991 | 185.454 |
| gnl UG Ssc#S18291190 | blue      | 260.46 | 118.709 | 0.935962 | 0.019265 | 19.976  |
| gnl UG Ssc#S18291250 | turquoise | 1563.3 | 1562.89 | 0.998669 | 5.83E-05 | 4.094   |
| gnl UG Ssc#S18291761 | grey      | 260.89 | 12.4328 | 0.834694 | 0.078649 | 16.596  |
| gnl UG Ssc#S18291801 | turquoise | 1387.6 | 1387.14 | 0.970717 | 0.005989 | 8.518   |
| gnl UG Ssc#S18292679 | navy      | 196.88 | 25.7599 | 0.93221  | 0.020971 | 14.25   |
| gnl UG Ssc#S18292832 | turquoise | 1525.8 | 1525.39 | 0.993349 | 0.00065  | 3.86    |
| gnl UG Ssc#S18295298 | turquoise | 923.7  | 921.256 | 0.87667  | 0.051019 | 8.59    |
| gnl UG Ssc#S18296629 | turquoise | 1568.2 | 1567.86 | 0.999018 | 3.69E-05 | 2.068   |
| gnl UG Ssc#S18301666 | turquoise | 1499.4 | 1498.8  | 0.989877 | 0.001221 | 7.94    |
| gnl UG Ssc#S18302191 | turquoise | 1558.5 | 1558.13 | 0.997081 | 0.000189 | 2.684   |
| gnl UG Ssc#S18332789 | turquoise | 645.84 | 640.314 | 0.794887 | 0.108016 | 4.142   |

|                      |               |        |         |          |          |         |
|----------------------|---------------|--------|---------|----------|----------|---------|
| gnl UG Ssc#S18336060 | turquoise     | 1325.5 | 1324.83 | 0.957252 | 0.010541 | 7.654   |
| gnl UG Ssc#S18336569 | blue          | 352.59 | 143.625 | 0.977308 | 0.004089 | 30.788  |
| gnl UG Ssc#S18337624 | turquoise     | 1539.9 | 1539.52 | 0.993976 | 0.000561 | 6.89    |
| gnl UG Ssc#S18353806 | turquoise     | 1511.7 | 1511.19 | 0.990616 | 0.00109  | 15.114  |
| gnl UG Ssc#S18353913 | turquoise     | 1454   | 1453.35 | 0.98217  | 0.00285  | 10.244  |
| gnl UG Ssc#S18354111 | turquoise     | 1537   | 1536.5  | 0.995673 | 0.000341 | 9.47    |
| gnl UG Ssc#S18354218 | blue          | 258.23 | 117.57  | 0.933664 | 0.020304 | 17.988  |
| gnl UG Ssc#S18354245 | brown         | 317.57 | 98.846  | 0.916805 | 0.028443 | 8.85    |
| gnl UG Ssc#S18354389 | greenyellow   | 85.04  | 8.29897 | 0.731064 | 0.160495 | 14.242  |
| gnl UG Ssc#S18354391 | red           | 205.45 | 50.4924 | 0.990207 | 0.001162 | 44.278  |
| gnl UG Ssc#S18354485 | darkturquoise | 161.83 | 17.4891 | 0.985722 | 0.002044 | 49.012  |
| gnl UG Ssc#S18354494 | lightyellow   | 310.39 | 25.5578 | 0.989531 | 0.001284 | 81.862  |
| gnl UG Ssc#S18354663 | blue          | 287.68 | 143.17  | 0.97644  | 0.004326 | 22.768  |
| gnl UG Ssc#S18354739 | turquoise     | 844.95 | 842.734 | 0.845195 | 0.071394 | 3.186   |
| gnl UG Ssc#S18354820 | turquoise     | 1543.4 | 1542.97 | 0.996035 | 0.000299 | 8.192   |
| gnl UG Ssc#S18355531 | turquoise     | 655.83 | 649.496 | 0.793168 | 0.109346 | 14.738  |
| gnl UG Ssc#S18355677 | turquoise     | 1549.9 | 1549.44 | 0.997552 | 0.000145 | 16.78   |
| gnl UG Ssc#S18355850 | turquoise     | 1276   | 1274.72 | 0.954212 | 0.01168  | 23.548  |
| gnl UG Ssc#S18355852 | yellow        | 264    | 57.6811 | 0.864503 | 0.05864  | 28.404  |
| gnl UG Ssc#S18355973 | tan           | 235.72 | 33.3205 | 0.952589 | 0.012304 | 55.092  |
| gnl UG Ssc#S18355989 | turquoise     | 171.11 | 100.478 | 0.282227 | 0.645486 | 18.234  |
| gnl UG Ssc#S18355994 | turquoise     | 671.75 | 667.094 | 0.800466 | 0.103732 | 6.48    |
| gnl UG Ssc#S18356013 | turquoise     | 1032.2 | 1029.97 | 0.898855 | 0.038023 | 9.482   |
| gnl UG Ssc#S18356019 | turquoise     | 1502.8 | 1502.37 | 0.987252 | 0.001725 | 2.752   |
| gnl UG Ssc#S18356022 | turquoise     | 1567.2 | 1566.75 | 0.999438 | 1.60E-05 | 18.308  |
| gnl UG Ssc#S18356106 | turquoise     | 1143.1 | 1141.06 | 0.925806 | 0.023988 | 79.476  |
| gnl UG Ssc#S18356219 | blue          | 257.16 | 116.625 | 0.932339 | 0.020912 | 71.426  |
| gnl UG Ssc#S18356252 | turquoise     | 1308.1 | 1307.3  | 0.951971 | 0.012544 | 1.656   |
| gnl UG Ssc#S18356685 | turquoise     | 1545.4 | 1544.88 | 0.997069 | 0.00019  | 2.612   |
| gnl UG Ssc#S18356838 | lightyellow   | 270.25 | 21.8145 | 0.94485  | 0.015418 | 25.446  |
| gnl UG Ssc#S18357219 | grey          | 78.111 | 7.6924  | -0.00144 | 0.998169 | 39.888  |
| gnl UG Ssc#S18357288 | turquoise     | 1105.3 | 1102.91 | 0.917119 | 0.028284 | 27.88   |
| gnl UG Ssc#S18357309 | turquoise     | 1537   | 1536.61 | 0.993503 | 0.000628 | 11.214  |
| gnl UG Ssc#S18357319 | turquoise     | 1252.1 | 1251.52 | 0.943499 | 0.015985 | 2.974   |
| gnl UG Ssc#S18357321 | blue          | 327.5  | 156.252 | 0.996778 | 0.000219 | 38.726  |
| gnl UG Ssc#S18357333 | turquoise     | 1348.8 | 1347.72 | 0.965933 | 0.007509 | 17.6    |
| gnl UG Ssc#S18357377 | turquoise     | 1219   | 1218.36 | 0.942128 | 0.016567 | 4.234   |
| gnl UG Ssc#S18357398 | turquoise     | 1208.2 | 1207.16 | 0.932105 | 0.021019 | 12.782  |
| gnl UG Ssc#S18357401 | turquoise     | 1308.5 | 1307.77 | 0.956414 | 0.010852 | 6.334   |
| gnl UG Ssc#S18357511 | turquoise     | 910.33 | 907.373 | 0.877702 | 0.050389 | 136.606 |
| gnl UG Ssc#S18357529 | turquoise     | 1571.4 | 1571.03 | 0.999739 | 5.05E-06 | 1.924   |
| gnl UG Ssc#S18357539 | turquoise     | 1322.2 | 1321.48 | 0.963775 | 0.008231 | 13.508  |
| gnl UG Ssc#S18357580 | turquoise     | 1340.9 | 1339.92 | 0.963482 | 0.008331 | 22.298  |
| gnl UG Ssc#S18357620 | magenta       | 304.87 | 40.8005 | 0.975372 | 0.004623 | 47.212  |
| gnl UG Ssc#S18357732 | turquoise     | 1439.3 | 1438.61 | 0.977957 | 0.003916 | 7.902   |
| gnl UG Ssc#S18358120 | turquoise     | 998.53 | 996.228 | 0.894237 | 0.040628 | 45.702  |
| gnl UG Ssc#S18358217 | turquoise     | 1555.7 | 1555.31 | 0.996683 | 0.000229 | 7.41    |
| gnl UG Ssc#S18358279 | red           | 154.99 | 37.7393 | 0.926715 | 0.023552 | 30.29   |

|                      |              |        |         |          |          |         |
|----------------------|--------------|--------|---------|----------|----------|---------|
| gnl UG Ssc#S18358324 | midnightblue | 226.42 | 36.7682 | 0.997578 | 0.000143 | 31.66   |
| gnl UG Ssc#S18358603 | turquoise    | 1521.1 | 1520.5  | 0.993767 | 0.00059  | 14.454  |
| gnl UG Ssc#S18358611 | turquoise    | 598.42 | 590.351 | 0.770773 | 0.127118 | 2.354   |
| gnl UG Ssc#S18358663 | turquoise    | 1264.6 | 1263.85 | 0.943057 | 0.016172 | 27.57   |
| gnl UG Ssc#S18359073 | turquoise    | 615.56 | 610.266 | 0.781068 | 0.118848 | 53.26   |
| gnl UG Ssc#S18359075 | royalblue    | 209.47 | 25.8539 | 0.993263 | 0.000663 | 5.85    |
| gnl UG Ssc#S18359101 | brown        | 129.06 | 58.3786 | 0.823346 | 0.086729 | 7.264   |
| gnl UG Ssc#S18359197 | magenta      | 316.51 | 36.5287 | 0.947581 | 0.014293 | 10.626  |
| gnl UG Ssc#S18359204 | black        | 171.69 | 24.488  | 0.859996 | 0.061547 | 149.918 |
| gnl UG Ssc#S18359209 | turquoise    | 1532.3 | 1531.95 | 0.992438 | 0.000788 | 17.614  |
| gnl UG Ssc#S18359264 | black        | 287.66 | 41.9333 | 0.992286 | 0.000812 | 49.778  |
| gnl UG Ssc#S18359292 | grey60       | 232.78 | 32.3673 | 0.992435 | 0.000789 | 25.896  |
| gnl UG Ssc#S18359512 | darkred      | 54.598 | 7.95953 | 0.726985 | 0.164049 | 9.814   |
| gnl UG Ssc#S18359550 | turquoise    | 1469.2 | 1468.61 | 0.985395 | 0.002114 | 38.736  |
| gnl UG Ssc#S18359557 | brown        | 103.2  | 46.2964 | 0.735417 | 0.156726 | 49.07   |
| gnl UG Ssc#S18359685 | turquoise    | 1481.7 | 1481.25 | 0.984816 | 0.002241 | 49.388  |
| gnl UG Ssc#S18359692 | turquoise    | 1531.5 | 1531.08 | 0.994395 | 0.000503 | 6.812   |
| gnl UG Ssc#S18359711 | turquoise    | 1563.5 | 1563.12 | 0.99899  | 3.85E-05 | 13.106  |
| gnl UG Ssc#S18359743 | turquoise    | 1304.7 | 1303.65 | 0.958431 | 0.01011  | 24.018  |
| gnl UG Ssc#S18359803 | turquoise    | 1517.7 | 1517.32 | 0.99217  | 0.000831 | 19.85   |
| gnl UG Ssc#S18359879 | turquoise    | 77.403 | 51.4    | 0.243146 | 0.693495 | 4.188   |
| gnl UG Ssc#S18360059 | turquoise    | 1531.1 | 1530.66 | 0.991998 | 0.000858 | 15.492  |
| gnl UG Ssc#S18360061 | turquoise    | 1550.5 | 1550.07 | 0.995652 | 0.000344 | 4.784   |
| gnl UG Ssc#S18360447 | turquoise    | 190.76 | 165.911 | 0.497607 | 0.393643 | 6.898   |
| gnl UG Ssc#S18360885 | turquoise    | 1568.1 | 1567.72 | 0.999055 | 3.49E-05 | 41.814  |
| gnl UG Ssc#S18361249 | turquoise    | 1521.1 | 1520.73 | 0.991115 | 0.001004 | 2.75    |
| gnl UG Ssc#S18361423 | yellow       | 257.9  | 73.953  | 0.955529 | 0.011182 | 217.404 |
| gnl UG Ssc#S18361504 | turquoise    | 1554.9 | 1554.48 | 0.997053 | 0.000192 | 5.212   |
| gnl UG Ssc#S18377137 | turquoise    | 1440   | 1439.49 | 0.976882 | 0.004205 | 34.416  |
| gnl UG Ssc#S18377961 | purple       | 232.22 | 33.1762 | 0.978294 | 0.003826 | 56.822  |
| gnl UG Ssc#S18378075 | turquoise    | 1331.1 | 1330.04 | 0.961569 | 0.008992 | 7.742   |
| gnl UG Ssc#S18378125 | turquoise    | 1333   | 1331.82 | 0.962473 | 0.008677 | 15.708  |
| gnl UG Ssc#S18378241 | turquoise    | 1562.1 | 1561.72 | 0.998238 | 8.88E-05 | 10.322  |
| gnl UG Ssc#S18378422 | yellow       | 179.55 | 54.2952 | 0.88603  | 0.045389 | 36.316  |
| gnl UG Ssc#S18378493 | turquoise    | 1478.4 | 1477.98 | 0.982826 | 0.002695 | 8.368   |
| gnl UG Ssc#S18378555 | turquoise    | 1516.4 | 1516.03 | 0.991602 | 0.000923 | 10.936  |
| gnl UG Ssc#S18378622 | turquoise    | 368.4  | 344.755 | 0.626622 | 0.257987 | 0.728   |
| gnl UG Ssc#S18378635 | turquoise    | 935.51 | 931.518 | 0.876091 | 0.051374 | 32.046  |
| gnl UG Ssc#S18378680 | pink         | 157.98 | 37.8487 | 0.947126 | 0.014479 | 89.55   |
| gnl UG Ssc#S18378791 | turquoise    | 1338.2 | 1337.4  | 0.959502 | 0.009724 | 42.39   |
| gnl UG Ssc#S18378854 | darkgreen    | 236.8  | 22.1421 | 0.97426  | 0.004938 | 26.316  |
| gnl UG Ssc#S18378962 | turquoise    | 1444.7 | 1443.96 | 0.981849 | 0.002928 | 14.756  |
| gnl UG Ssc#S18378972 | turquoise    | 601.94 | 595.643 | 0.77767  | 0.12156  | 71.884  |
| gnl UG Ssc#S18379116 | turquoise    | 1535.7 | 1535.27 | 0.993552 | 0.000621 | 71.356  |
| gnl UG Ssc#S18379252 | greenyellow  | 195.84 | 22.8506 | 0.994218 | 0.000527 | 37.534  |
| gnl UG Ssc#S18379340 | turquoise    | 1564.8 | 1564.36 | 0.999206 | 2.69E-05 | 1.634   |
| gnl UG Ssc#S18379413 | yellow       | 142.83 | 38.5722 | 0.76767  | 0.129642 | 6.348   |
| gnl UG Ssc#S18379594 | blue         | 329.77 | 154.076 | 0.993597 | 0.000614 | 27.862  |

|                      |             |        |         |          |          |         |
|----------------------|-------------|--------|---------|----------|----------|---------|
| gnl UG Ssc#S18379693 | turquoise   | 1224.9 | 1223.42 | 0.945488 | 0.015153 | 30.318  |
| gnl UG Ssc#S18379831 | darkgreen   | 284.22 | 24.0666 | 0.998695 | 5.66E-05 | 6.934   |
| gnl UG Ssc#S18380006 | turquoise   | 1556.5 | 1556.02 | 0.998238 | 8.88E-05 | 47.024  |
| gnl UG Ssc#S18380089 | turquoise   | 1132.7 | 1131.14 | 0.921209 | 0.026233 | 1.226   |
| gnl UG Ssc#S18380107 | green       | 286.49 | 39.4794 | 0.895249 | 0.040052 | 47.406  |
| gnl UG Ssc#S18380485 | royalblue   | 138.96 | 19.717  | 0.929136 | 0.022403 | 28.552  |
| gnl UG Ssc#S18380498 | turquoise   | 1555.3 | 1554.89 | 0.998284 | 8.53E-05 | 2.186   |
| gnl UG Ssc#S18380653 | blue        | 293.62 | 125.445 | 0.94625  | 0.014838 | 22.318  |
| gnl UG Ssc#S18380710 | turquoise   | 1526.7 | 1526.19 | 0.994379 | 0.000505 | 42.374  |
| gnl UG Ssc#S18381103 | turquoise   | 1429.1 | 1428.27 | 0.979255 | 0.003576 | 17.824  |
| gnl UG Ssc#S18381113 | turquoise   | 1553.6 | 1553.18 | 0.996528 | 0.000245 | 0.566   |
| gnl UG Ssc#S18381258 | blue        | 335.52 | 145.555 | 0.980392 | 0.003286 | 54.082  |
| gnl UG Ssc#S18381735 | turquoise   | 1551.4 | 1551.03 | 0.995573 | 0.000353 | 4.43    |
| gnl UG Ssc#S18381759 | turquoise   | 1512   | 1511.63 | 0.988591 | 0.00146  | 3.642   |
| gnl UG Ssc#S18381810 | lightcyan   | 212.17 | 18.8035 | 0.912728 | 0.030541 | 37.342  |
| gnl UG Ssc#S18381906 | turquoise   | 779.66 | 776.224 | 0.84535  | 0.071289 | 3.7     |
| gnl UG Ssc#S18382205 | turquoise   | 1507.4 | 1506.94 | 0.990135 | 0.001174 | 1.504   |
| gnl UG Ssc#S18382284 | black       | 297.99 | 38.0547 | 0.957136 | 0.010584 | 45.738  |
| gnl UG Ssc#S18382407 | brown       | 250.26 | 117.988 | 0.974407 | 0.004896 | 23.992  |
| gnl UG Ssc#S18382475 | turquoise   | 1526.2 | 1525.77 | 0.994165 | 0.000535 | 19.176  |
| gnl UG Ssc#S18382627 | brown       | 213.66 | 106.156 | 0.950601 | 0.013082 | 13.542  |
| gnl UG Ssc#S18382745 | turquoise   | 1490.4 | 1490.03 | 0.987529 | 0.001669 | 23.462  |
| gnl UG Ssc#S18382807 | turquoise   | 1360.5 | 1359.67 | 0.967609 | 0.006964 | 101.01  |
| gnl UG Ssc#S18383139 | turquoise   | 1497.6 | 1497.16 | 0.988203 | 0.001535 | 5.042   |
| gnl UG Ssc#S18383171 | lightgreen  | 72.529 | 13.7299 | 0.919523 | 0.027073 | 9.698   |
| gnl UG Ssc#S18383234 | turquoise   | 1561.1 | 1560.63 | 0.999032 | 3.61E-05 | 15.106  |
| gnl UG Ssc#S18383248 | turquoise   | 603.14 | 594.538 | 0.768094 | 0.129296 | 109.836 |
| gnl UG Ssc#S18383312 | grey        | 309.48 | 15.883  | 0.921601 | 0.026039 | 21.01   |
| gnl UG Ssc#S18383319 | turquoise   | 1109.5 | 1107.05 | 0.917888 | 0.027895 | 17.566  |
| gnl UG Ssc#S18383368 | turquoise   | 1525.6 | 1525.1  | 0.993613 | 0.000612 | 1.132   |
| gnl UG Ssc#S18383442 | salmon      | 202.18 | 28.1715 | 0.960365 | 0.009416 | 49.204  |
| gnl UG Ssc#S18383473 | turquoise   | 848.85 | 846.5   | 0.846556 | 0.070469 | 29.062  |
| gnl UG Ssc#S18383636 | turquoise   | 88.348 | 49.2194 | 0.212083 | 0.732005 | 17.554  |
| gnl UG Ssc#S18383647 | turquoise   | 1548.5 | 1548.16 | 0.995075 | 0.000415 | 2.594   |
| gnl UG Ssc#S18383725 | greenyellow | 88.31  | 5.18414 | -0.34143 | 0.573874 | 78.988  |
| gnl UG Ssc#S18383839 | turquoise   | 1511.8 | 1511.44 | 0.989409 | 0.001306 | 28.664  |
| gnl UG Ssc#S18383932 | yellow      | 99.678 | 42.606  | 0.794768 | 0.108108 | 125.264 |
| gnl UG Ssc#S18384142 | turquoise   | 939.48 | 937.581 | 0.874586 | 0.052301 | 12.952  |
| gnl UG Ssc#S18384560 | lightgreen  | 31.106 | 6.80504 | 0.67742  | 0.208963 | 6.874   |
| gnl UG Ssc#S18385097 | turquoise   | 1413.2 | 1412.75 | 0.975095 | 0.0047   | 8.948   |
| gnl UG Ssc#S18386392 | turquoise   | 1145.8 | 1144.18 | 0.929431 | 0.022264 | 16.828  |
| gnl UG Ssc#S18386541 | turquoise   | 1542.1 | 1541.69 | 0.996279 | 0.000272 | 29.126  |
| gnl UG Ssc#S18386573 | turquoise   | 1426.9 | 1426.37 | 0.973854 | 0.005055 | 11.57   |
| gnl UG Ssc#S18386751 | lightyellow | 224.23 | 16.6721 | 0.882676 | 0.047383 | 48.998  |
| gnl UG Ssc#S18386777 | turquoise   | 721.4  | 714.11  | 0.81067  | 0.096035 | 1.842   |
| gnl UG Ssc#S18386841 | turquoise   | 1351.3 | 1350.2  | 0.965657 | 0.0076   | 19.458  |
| gnl UG Ssc#S18387078 | lightcyan   | 227.3  | 21.2913 | 0.941476 | 0.016846 | 116.064 |
| gnl UG Ssc#S18387120 | turquoise   | 1339.3 | 1338.72 | 0.958905 | 0.009939 | 0.756   |

|                      |             |        |         |          |          |         |
|----------------------|-------------|--------|---------|----------|----------|---------|
| gnl UG Ssc#S18387146 | turquoise   | 1546.9 | 1546.52 | 0.996331 | 0.000267 | 6.392   |
| gnl UG Ssc#S18387207 | magenta     | 337.18 | 42.8754 | 0.984815 | 0.002241 | 25.632  |
| gnl UG Ssc#S18387223 | turquoise   | 1568.6 | 1568.2  | 0.999755 | 4.60E-06 | 70.27   |
| gnl UG Ssc#S18387292 | magenta     | 331.05 | 41.8468 | 0.979953 | 0.003397 | 48.124  |
| gnl UG Ssc#S18387444 | turquoise   | 1559.6 | 1559.19 | 0.998505 | 6.94E-05 | 1.636   |
| gnl UG Ssc#S18387501 | turquoise   | 1498.8 | 1498.2  | 0.989537 | 0.001283 | 40.584  |
| gnl UG Ssc#S18387558 | turquoise   | 383.61 | 375.468 | 0.662876 | 0.222708 | 72.244  |
| gnl UG Ssc#S18387783 | royalblue   | 218.84 | 25.5206 | 0.989878 | 0.001221 | 65.11   |
| gnl UG Ssc#S18387794 | turquoise   | 1558.2 | 1557.74 | 0.998068 | 0.000102 | 26.578  |
| gnl UG Ssc#S18388327 | turquoise   | 1551.2 | 1550.83 | 0.996587 | 0.000239 | 4.264   |
| gnl UG Ssc#S18545724 | turquoise   | 1553.6 | 1553.18 | 0.996528 | 0.000245 | 1.89    |
| gnl UG Ssc#S18545870 | blue        | 293.87 | 133.908 | 0.962275 | 0.008746 | 14.796  |
| gnl UG Ssc#S18546038 | grey        | 70.108 | 9.82681 | -0.03396 | 0.956768 | 42.052  |
| gnl UG Ssc#S18546109 | turquoise   | 1553.6 | 1553.18 | 0.996528 | 0.000245 | 0.804   |
| gnl UG Ssc#S18546249 | turquoise   | 161.86 | 144.913 | 0.470546 | 0.42379  | 14.344  |
| gnl UG Ssc#S18546252 | turquoise   | 1096.7 | 1095.52 | 0.913261 | 0.030264 | 17.8    |
| gnl UG Ssc#S18546322 | turquoise   | 1571.1 | 1570.75 | 0.999627 | 8.66E-06 | 1.406   |
| gnl UG Ssc#S18546390 | black       | 286.06 | 35.4307 | 0.927691 | 0.023086 | 133.922 |
| gnl UG Ssc#S18546426 | turquoise   | 1227.3 | 1226.18 | 0.93718  | 0.018722 | 73.002  |
| gnl UG Ssc#S18546455 | green       | 98.337 | 19.862  | 0.730773 | 0.160747 | 34.06   |
| gnl UG Ssc#S18546458 | brown       | 170.71 | 77.0048 | 0.881808 | 0.047903 | 3.55    |
| gnl UG Ssc#S18546477 | purple      | 257.7  | 31.9546 | 0.972227 | 0.005533 | 95.766  |
| gnl UG Ssc#S18546487 | turquoise   | 1551.1 | 1550.67 | 0.997807 | 0.000123 | 15.778  |
| gnl UG Ssc#S18546502 | turquoise   | 1408.5 | 1407.87 | 0.970992 | 0.005905 | 12.25   |
| gnl UG Ssc#S18546548 | turquoise   | 1511.3 | 1510.86 | 0.990989 | 0.001025 | 3.026   |
| gnl UG Ssc#S18546597 | turquoise   | 1560.2 | 1559.81 | 0.997361 | 0.000163 | 6.854   |
| gnl UG Ssc#S18546732 | turquoise   | 1558.7 | 1558.26 | 0.998628 | 6.10E-05 | 8.906   |
| gnl UG Ssc#S18546780 | turquoise   | 1555.8 | 1555.42 | 0.997808 | 0.000123 | 9.74    |
| gnl UG Ssc#S18546943 | turquoise   | 1016.9 | 1014.43 | 0.898528 | 0.038206 | 11.014  |
| gnl UG Ssc#S18546946 | blue        | 248.7  | 118.963 | 0.934047 | 0.02013  | 13.348  |
| gnl UG Ssc#S18546970 | turquoise   | 1553.6 | 1553.18 | 0.996528 | 0.000245 | 3.024   |
| gnl UG Ssc#S18547043 | turquoise   | 1343.4 | 1342.43 | 0.965284 | 0.007724 | 12.792  |
| gnl UG Ssc#S18547054 | turquoise   | 1453.8 | 1453.09 | 0.982316 | 0.002815 | 2.426   |
| gnl UG Ssc#S18547326 | turquoise   | 1550.6 | 1550.23 | 0.996654 | 0.000232 | 8.406   |
| gnl UG Ssc#S18547346 | turquoise   | 1493   | 1492.52 | 0.986595 | 0.001859 | 17.558  |
| gnl UG Ssc#S18547360 | blue        | 315.42 | 142.929 | 0.976567 | 0.004291 | 64.294  |
| gnl UG Ssc#S18547573 | pink        | 267.77 | 40.1755 | 0.955788 | 0.011085 | 283.934 |
| gnl UG Ssc#S18547766 | red         | 232.05 | 51.6131 | 0.994197 | 0.00053  | 18.122  |
| gnl UG Ssc#S18548111 | yellow      | 114.81 | 42.0217 | 0.809111 | 0.097199 | 33.19   |
| gnl UG Ssc#S18548354 | lightyellow | 273.55 | 21.2051 | 0.95061  | 0.013078 | 11.93   |
| gnl UG Ssc#S18548374 | turquoise   | 1500.4 | 1499.96 | 0.987069 | 0.001762 | 2.126   |
| gnl UG Ssc#S18548467 | turquoise   | 1258.5 | 1257.34 | 0.952055 | 0.012511 | 42.718  |
| gnl UG Ssc#S18548520 | greenyellow | 57.271 | 3.46993 | -0.08695 | 0.889429 | 31.116  |
| gnl UG Ssc#S18548531 | tan         | 261    | 33.1635 | 0.954404 | 0.011607 | 26.948  |
| gnl UG Ssc#S18548560 | blue        | 311.93 | 148.698 | 0.985863 | 0.002014 | 46.514  |
| gnl UG Ssc#S18548660 | turquoise   | 1070.1 | 1067.38 | 0.909382 | 0.032297 | 126.948 |
| gnl UG Ssc#S18548755 | turquoise   | 1525.4 | 1524.92 | 0.993754 | 0.000592 | 14.692  |
| gnl UG Ssc#S18548853 | turquoise   | 1553.6 | 1553.18 | 0.996528 | 0.000245 | 0.708   |

|                      |               |        |         |          |          |         |
|----------------------|---------------|--------|---------|----------|----------|---------|
| gnl UG Ssc#S18548934 | turquoise     | 475.07 | 468.074 | 0.731534 | 0.160087 | 33.224  |
| gnl UG Ssc#S18549014 | turquoise     | 513.91 | 510.634 | 0.73702  | 0.155345 | 0.588   |
| gnl UG Ssc#S18549214 | turquoise     | 1537.4 | 1537.04 | 0.993527 | 0.000625 | 6.584   |
| gnl UG Ssc#S18549337 | turquoise     | 397.81 | 381.269 | 0.655128 | 0.230127 | 63.252  |
| gnl UG Ssc#S18549381 | turquoise     | 1553.6 | 1553.18 | 0.996528 | 0.000245 | 0.142   |
| gnl UG Ssc#S18549395 | lightcyan     | 291.23 | 27.0834 | 0.986907 | 0.001795 | 52.166  |
| gnl UG Ssc#S18549403 | turquoise     | 1357   | 1356.39 | 0.969531 | 0.006355 | 31.784  |
| gnl UG Ssc#S18549419 | turquoise     | 1548.5 | 1548.06 | 0.995781 | 0.000329 | 3.798   |
| gnl UG Ssc#S18549491 | yellow        | 233.44 | 76.7857 | 0.970884 | 0.005938 | 19.764  |
| gnl UG Ssc#S18549494 | red           | 262.26 | 45.6448 | 0.96232  | 0.00873  | 85.238  |
| gnl UG Ssc#S18549522 | turquoise     | 593.5  | 582.51  | 0.759417 | 0.136427 | 17.148  |
| gnl UG Ssc#S18549536 | turquoise     | 157.38 | 83.3489 | 0.233171 | 0.70583  | 165.034 |
| gnl UG Ssc#S18549545 | turquoise     | 1447.4 | 1446.89 | 0.981063 | 0.003119 | 6.604   |
| gnl UG Ssc#S18549601 | turquoise     | 629.13 | 624.991 | 0.786334 | 0.114684 | 17.734  |
| gnl UG Ssc#S18549761 | grey          | 295.71 | 15.1972 | 0.937128 | 0.018745 | 102.028 |
| gnl UG Ssc#S18549874 | lightyellow   | 250.33 | 21.0247 | 0.926265 | 0.023767 | 4.778   |
| gnl UG Ssc#S18549877 | turquoise     | 1553.6 | 1553.18 | 0.996528 | 0.000245 | 0.756   |
| gnl UG Ssc#S18549905 | royalblue     | 146.07 | 21.0779 | 0.943994 | 0.015776 | 39.382  |
| gnl UG Ssc#S18549962 | turquoise     | 1322.5 | 1321.87 | 0.956135 | 0.010956 | 12.638  |
| gnl UG Ssc#S18550002 | grey          | 318.17 | 15.8257 | 0.927995 | 0.022942 | 56.344  |
| gnl UG Ssc#S18550086 | turquoise     | 1327.3 | 1326.7  | 0.955379 | 0.011239 | 19.348  |
| gnl UG Ssc#S18550127 | turquoise     | 1537.6 | 1537.25 | 0.994222 | 0.000527 | 47.838  |
| gnl UG Ssc#S18550181 | turquoise     | 316.98 | 304.61  | 0.626807 | 0.257802 | 1.19    |
| gnl UG Ssc#S18550190 | brown         | 118.12 | 40.8047 | 0.709103 | 0.179895 | 24.714  |
| gnl UG Ssc#S18550295 | turquoise     | 1284.1 | 1283.43 | 0.948871 | 0.013771 | 5.03    |
| gnl UG Ssc#S18550348 | turquoise     | 1473.8 | 1473.34 | 0.983909 | 0.002444 | 6.466   |
| gnl UG Ssc#S18550420 | blue          | 239.63 | 109.78  | 0.916401 | 0.028649 | 36.144  |
| gnl UG Ssc#S18550520 | turquoise     | 561.39 | 556.161 | 0.752838 | 0.141909 | 37.668  |
| gnl UG Ssc#S18550560 | blue          | 329.79 | 155.224 | 0.995244 | 0.000393 | 15.082  |
| gnl UG Ssc#S18550631 | purple        | 181.98 | 27.189  | 0.925294 | 0.024235 | 1.676   |
| gnl UG Ssc#S18550647 | turquoise     | 174.98 | 158.219 | 0.491825 | 0.40004  | 2.492   |
| gnl UG Ssc#S18550712 | turquoise     | 1348   | 1347.36 | 0.959231 | 0.009821 | 15.832  |
| gnl UG Ssc#S18550902 | black         | 292.5  | 41.6707 | 0.979801 | 0.003436 | 168.894 |
| gnl UG Ssc#S18551025 | turquoise     | 136.18 | 121.962 | 0.448073 | 0.449207 | 24.406  |
| gnl UG Ssc#S18551055 | brown         | 267.11 | 105.913 | 0.939903 | 0.017525 | 11.54   |
| gnl UG Ssc#S18551170 | turquoise     | 1345.6 | 1344.99 | 0.958632 | 0.010037 | 2.232   |
| gnl UG Ssc#S18551209 | grey60        | 258.53 | 29.5389 | 0.97326  | 0.005228 | 239.84  |
| gnl UG Ssc#S18551494 | brown         | 191.15 | 101.443 | 0.948605 | 0.013878 | 106.508 |
| gnl UG Ssc#S18551519 | darkturquoise | 174.98 | 6.00281 | 0.739862 | 0.152905 | 32.158  |
| gnl UG Ssc#S18551520 | turquoise     | 456.72 | 448.883 | 0.709108 | 0.179891 | 36.162  |
| gnl UG Ssc#S18551577 | turquoise     | 1558.9 | 1558.55 | 0.996984 | 0.000199 | 22.924  |
| gnl UG Ssc#S18551614 | turquoise     | 1334.1 | 1333.54 | 0.959597 | 0.00969  | 2.288   |
| gnl UG Ssc#S18551640 | darkturquoise | 175.42 | 8.89264 | 0.828862 | 0.082771 | 12.876  |
| gnl UG Ssc#S18551688 | turquoise     | 1484.3 | 1483.65 | 0.988461 | 0.001485 | 22.65   |
| gnl UG Ssc#S18551801 | turquoise     | 847.98 | 845.882 | 0.848576 | 0.069104 | 102.958 |
| gnl UG Ssc#S18551834 | navy          | 193.31 | 24.2211 | 0.917397 | 0.028143 | 29.176  |
| gnl UG Ssc#S18551845 | red           | 201.4  | 50.5198 | 0.990002 | 0.001198 | 2.12    |
| gnl UG Ssc#S18552012 | black         | 256.05 | 36.1018 | 0.933267 | 0.020486 | 48.172  |



|                      |            |        |         |          |          |         |
|----------------------|------------|--------|---------|----------|----------|---------|
| gnl UG Ssc#S18552081 | turquoise  | 1252.4 | 1251.38 | 0.950219 | 0.013233 | 14.848  |
| gnl UG Ssc#S18552112 | turquoise  | 1551.1 | 1550.71 | 0.996908 | 0.000206 | 12.394  |
| gnl UG Ssc#S18552226 | tan        | 318.28 | 38.0012 | 0.981494 | 0.003014 | 18.202  |
| gnl UG Ssc#S18552237 | blue       | 292.43 | 110.328 | 0.917095 | 0.028296 | 31.722  |
| gnl UG Ssc#S18552312 | black      | 112.89 | 13.7609 | 0.651949 | 0.233191 | 41.68   |
| gnl UG Ssc#S18552383 | pink       | 127.61 | 31.299  | 0.903428 | 0.035499 | 21.084  |
| gnl UG Ssc#S18552418 | turquoise  | 1518.5 | 1518.05 | 0.991619 | 0.00092  | 3.414   |
| gnl UG Ssc#S18552425 | brown      | 234.35 | 121.01  | 0.984931 | 0.002216 | 16      |
| gnl UG Ssc#S18552433 | turquoise  | 255.22 | 233.788 | 0.569453 | 0.316306 | 19.226  |
| gnl UG Ssc#S18552515 | lightgreen | 72.312 | 4.93793 | 0.073729 | 0.906211 | 11.726  |
| gnl UG Ssc#S18552627 | turquoise  | 1137.4 | 1135.67 | 0.928667 | 0.022624 | 43.956  |
| gnl UG Ssc#S18552822 | purple     | 174.64 | 27.5104 | 0.931203 | 0.021436 | 2.656   |
| gnl UG Ssc#S18553035 | green      | 240.57 | 52.4682 | 0.988142 | 0.001547 | 82.94   |
| gnl UG Ssc#S18553137 | turquoise  | 1057.3 | 1056.02 | 0.900639 | 0.037032 | 72.572  |
| gnl UG Ssc#S18553195 | turquoise  | 1421.8 | 1420.94 | 0.977437 | 0.004055 | 130.464 |
| gnl UG Ssc#S18553224 | turquoise  | 1512   | 1511.5  | 0.991239 | 0.000983 | 6.042   |
| gnl UG Ssc#S18553277 | red        | 149.17 | 40.9268 | 0.940883 | 0.017101 | 2.756   |
| gnl UG Ssc#S18553314 | turquoise  | 1540   | 1539.49 | 0.995748 | 0.000333 | 2.608   |
| gnl UG Ssc#S18553358 | turquoise  | 1547.6 | 1547.27 | 0.995117 | 0.000409 | 12.292  |
| gnl UG Ssc#S18553403 | pink       | 254.78 | 45.5661 | 0.984618 | 0.002285 | 418.774 |
| gnl UG Ssc#S18553548 | turquoise  | 1554   | 1553.47 | 0.998018 | 0.000106 | 62.802  |
| gnl UG Ssc#S18553581 | turquoise  | 422.41 | 417.217 | 0.689231 | 0.197984 | 77.634  |
| gnl UG Ssc#S18553622 | turquoise  | 1548.7 | 1548.25 | 0.997045 | 0.000193 | 24.558  |
| gnl UG Ssc#S18553702 | navy       | 246.61 | 28.7809 | 0.960611 | 0.009329 | 45.94   |
| gnl UG Ssc#S18553743 | turquoise  | 433.54 | 426.129 | 0.708723 | 0.180237 | 17.15   |
| gnl UG Ssc#S18553763 | blue       | 325.24 | 153.053 | 0.992018 | 0.000855 | 11.774  |
| gnl UG Ssc#S18553917 | turquoise  | 1543.8 | 1543.43 | 0.995015 | 0.000422 | 2.706   |
| gnl UG Ssc#S18553939 | turquoise  | 1540.9 | 1540.55 | 0.993749 | 0.000593 | 18.862  |
| gnl UG Ssc#S18554123 | turquoise  | 900.34 | 898.353 | 0.860164 | 0.061438 | 11.556  |
| gnl UG Ssc#S18554156 | blue       | 301.22 | 134.348 | 0.963312 | 0.008389 | 10.58   |
| gnl UG Ssc#S18554195 | turquoise  | 891.25 | 889.9   | 0.867999 | 0.056417 | 159.298 |
| gnl UG Ssc#S18554224 | green      | 103.24 | 16.0405 | 0.664472 | 0.221188 | 4.874   |
| gnl UG Ssc#S18554258 | turquoise  | 1351.6 | 1350.97 | 0.963288 | 0.008397 | 12.75   |
| gnl UG Ssc#S18554282 | turquoise  | 155.49 | 136.564 | 0.427833 | 0.472373 | 25.106  |
| gnl UG Ssc#S18554366 | grey60     | 212.14 | 29.3692 | 0.973001 | 0.005304 | 71.63   |
| gnl UG Ssc#S18554424 | magenta    | 329.31 | 45.4303 | 0.998105 | 9.90E-05 | 23.498  |
| gnl UG Ssc#S18554456 | navy       | 151.42 | 16.5793 | 0.826436 | 0.084505 | 0.094   |
| gnl UG Ssc#S18554486 | pink       | 197.87 | 45.4031 | 0.987248 | 0.001725 | 42.48   |
| gnl UG Ssc#S18554614 | blue       | 318.14 | 145.055 | 0.979867 | 0.003419 | 8.062   |
| gnl UG Ssc#S18554740 | turquoise  | 1048.2 | 1045.79 | 0.908343 | 0.032849 | 19.804  |
| gnl UG Ssc#S18554743 | turquoise  | 1477.7 | 1477.16 | 0.984556 | 0.002299 | 4.048   |
| gnl UG Ssc#S18554829 | turquoise  | 1232.2 | 1231.54 | 0.937789 | 0.018452 | 3.628   |
| gnl UG Ssc#S18554887 | yellow     | 221.09 | 82.2368 | 0.989594 | 0.001272 | 49.448  |
| gnl UG Ssc#S18554897 | brown      | 287.8  | 118.614 | 0.968814 | 0.00658  | 109.696 |
| gnl UG Ssc#S18555004 | yellow     | 251.81 | 66.9042 | 0.938452 | 0.01816  | 90.844  |
| gnl UG Ssc#S18555039 | turquoise  | 1539.5 | 1539.04 | 0.995767 | 0.00033  | 32.738  |
| gnl UG Ssc#S18555055 | turquoise  | 1501.4 | 1500.79 | 0.991085 | 0.001009 | 22.152  |
| gnl UG Ssc#S18555071 | lightgreen | 62.042 | 17.1752 | 0.994886 | 0.000439 | 11.7    |

|                      |               |        |         |          |          |         |
|----------------------|---------------|--------|---------|----------|----------|---------|
| gnl UG Ssc#S18555169 | turquoise     | 1506.6 | 1506.17 | 0.988391 | 0.001499 | 1.312   |
| gnl UG Ssc#S18555277 | turquoise     | 154.35 | 96.725  | 0.323839 | 0.595    | 21.836  |
| gnl UG Ssc#S18555329 | green         | 104.93 | 24.3159 | 0.786999 | 0.114161 | 7.974   |
| gnl UG Ssc#S18555410 | turquoise     | 1555.1 | 1554.69 | 0.997216 | 0.000176 | 58.646  |
| gnl UG Ssc#S18555414 | red           | 206.22 | 51.0515 | 0.992381 | 0.000797 | 25.374  |
| gnl UG Ssc#S18555438 | darkgreen     | 137.58 | 11.6061 | 0.837802 | 0.076479 | 6.06    |
| gnl UG Ssc#S18555480 | blue          | 337.63 | 146.167 | 0.981294 | 0.003063 | 15.036  |
| gnl UG Ssc#S18555551 | brown         | 113.78 | 50.719  | 0.748988 | 0.145146 | 42.922  |
| gnl UG Ssc#S18555613 | turquoise     | 962.94 | 960.667 | 0.887572 | 0.044482 | 24.054  |
| gnl UG Ssc#S18555750 | green         | 98.242 | 13.1225 | 0.631358 | 0.253299 | 10.836  |
| gnl UG Ssc#S18555802 | tan           | 313.26 | 39.694  | 0.991002 | 0.001023 | 18.038  |
| gnl UG Ssc#S18555925 | blue          | 321.91 | 139.094 | 0.970384 | 0.006091 | 18.266  |
| gnl UG Ssc#S18555986 | magenta       | 308.31 | 35.1957 | 0.939434 | 0.017729 | 32.43   |
| gnl UG Ssc#S18556194 | tan           | 320.63 | 40.5313 | 0.995816 | 0.000325 | 37.976  |
| gnl UG Ssc#S18556295 | turquoise     | 699.38 | 695.426 | 0.818231 | 0.090449 | 91.196  |
| gnl UG Ssc#S18556357 | turquoise     | 1564.1 | 1563.7  | 0.999383 | 1.84E-05 | 24.986  |
| gnl UG Ssc#S18556589 | yellow        | 233.61 | 71.8281 | 0.952712 | 0.012256 | 232.77  |
| gnl UG Ssc#S18556629 | turquoise     | 1550.1 | 1549.69 | 0.995616 | 0.000348 | 2.168   |
| gnl UG Ssc#S18556647 | turquoise     | 1064.7 | 1062.99 | 0.914722 | 0.029509 | 1.382   |
| gnl UG Ssc#S18556801 | tan           | 305.15 | 36.6102 | 0.972843 | 0.00535  | 21.764  |
| gnl UG Ssc#S18557007 | turquoise     | 1207   | 1206.44 | 0.94101  | 0.017046 | 5.54    |
| gnl UG Ssc#S18557168 | darkturquoise | 188.08 | 17.5162 | 0.981938 | 0.002906 | 12.918  |
| gnl UG Ssc#S18557176 | turquoise     | 1553.6 | 1553.18 | 0.996528 | 0.000245 | 0.992   |
| gnl UG Ssc#S18557214 | turquoise     | 1462   | 1461.58 | 0.980046 | 0.003373 | 13.58   |
| gnl UG Ssc#S18557247 | turquoise     | 1525.1 | 1524.63 | 0.993663 | 0.000605 | 41.234  |
| gnl UG Ssc#S18557342 | grey60        | 224.15 | 32.2482 | 0.99188  | 0.000877 | 54.958  |
| gnl UG Ssc#S18557502 | yellow        | 98.449 | 39.3811 | 0.80319  | 0.101659 | 31.762  |
| gnl UG Ssc#S18557525 | turquoise     | 946.94 | 945.319 | 0.872671 | 0.053487 | 20.288  |
| gnl UG Ssc#S18557598 | turquoise     | 1290.1 | 1289.22 | 0.948835 | 0.013786 | 28.182  |
| gnl UG Ssc#S18557699 | black         | 277.87 | 38.4102 | 0.949857 | 0.013377 | 52.308  |
| gnl UG Ssc#S18557753 | turquoise     | 1435.9 | 1435.33 | 0.979238 | 0.00358  | 9.854   |
| gnl UG Ssc#S18557837 | brown         | 326.72 | 95.814  | 0.908374 | 0.032832 | 595.22  |
| gnl UG Ssc#S18557979 | turquoise     | 1393.2 | 1392.63 | 0.970865 | 0.005944 | 5.364   |
| gnl UG Ssc#S18558052 | turquoise     | 1535.2 | 1534.71 | 0.994695 | 0.000463 | 2.62    |
| gnl UG Ssc#S18558087 | turquoise     | 1533.8 | 1533.44 | 0.993354 | 0.00065  | 6.49    |
| gnl UG Ssc#S18558114 | turquoise     | 1561.8 | 1561.4  | 0.997774 | 0.000126 | 5.304   |
| gnl UG Ssc#S18558128 | turquoise     | 1510.5 | 1510.04 | 0.989685 | 0.001256 | 5.992   |
| gnl UG Ssc#S18558146 | turquoise     | 1513.5 | 1512.91 | 0.992729 | 0.000743 | 6.608   |
| gnl UG Ssc#S18558154 | turquoise     | 1452.3 | 1451.52 | 0.983305 | 0.002583 | 3.548   |
| gnl UG Ssc#S18558242 | green         | 154.53 | 42.8    | 0.931367 | 0.021361 | 41.124  |
| gnl UG Ssc#S18558244 | turquoise     | 715.51 | 711.448 | 0.812509 | 0.094667 | 4.02    |
| gnl UG Ssc#S18558287 | turquoise     | 1532   | 1531.61 | 0.993229 | 0.000668 | 1.714   |
| gnl UG Ssc#S18558291 | turquoise     | 1155.2 | 1153.42 | 0.931927 | 0.021102 | 76.588  |
| gnl UG Ssc#S18558299 | lightcyan     | 167.69 | 6.486   | 0.155554 | 0.802744 | 100.696 |
| gnl UG Ssc#S18558304 | turquoise     | 1489.6 | 1489.05 | 0.987306 | 0.001714 | 13.872  |
| gnl UG Ssc#S18558403 | lightcyan     | 292.58 | 26.0627 | 0.984654 | 0.002277 | 31.51   |
| gnl UG Ssc#S19537170 | purple        | 108.3  | 16.0071 | 0.791607 | 0.110559 | 19.628  |
| gnl UG Ssc#S19537215 | turquoise     | 1418.7 | 1418.16 | 0.975655 | 0.004543 | 7.236   |

|                      |             |        |         |          |          |         |
|----------------------|-------------|--------|---------|----------|----------|---------|
| gnl UG Ssc#S19538625 | turquoise   | 868.98 | 866.882 | 0.866875 | 0.057129 | 0.804   |
| gnl UG Ssc#S19538787 | turquoise   | 417.38 | 410.194 | 0.681351 | 0.205291 | 13.426  |
| gnl UG Ssc#S19538970 | turquoise   | 963.81 | 961.394 | 0.888455 | 0.043965 | 274.398 |
| gnl UG Ssc#S19538990 | greenyellow | 96.594 | 6.13085 | 0.017206 | 0.978093 | 10.626  |
| gnl UG Ssc#S19539102 | blue        | 308.41 | 148.422 | 0.984875 | 0.002228 | 4.618   |
| gnl UG Ssc#S19539303 | turquoise   | 1564.6 | 1564.23 | 0.998575 | 6.45E-05 | 5.124   |
| gnl UG Ssc#S19539315 | salmon      | 190.87 | 30.4577 | 0.989046 | 0.001374 | 13.978  |
| gnl UG Ssc#S19539468 | turquoise   | 687.38 | 680.333 | 0.800439 | 0.103753 | 33.944  |
| gnl UG Ssc#S19539620 | green       | 111.05 | 31.0651 | 0.843827 | 0.072326 | 170.942 |
| gnl UG Ssc#S19539677 | turquoise   | 1564.9 | 1564.55 | 0.998925 | 4.23E-05 | 63.076  |
| gnl UG Ssc#S19539691 | turquoise   | 902.1  | 900.078 | 0.864284 | 0.058781 | 21.292  |
| gnl UG Ssc#S19539710 | turquoise   | 1119.3 | 1118.23 | 0.925859 | 0.023963 | 6.44    |
| gnl UG Ssc#S19539925 | turquoise   | 1472.5 | 1472.05 | 0.984514 | 0.002308 | 48.504  |
| gnl UG Ssc#S19540021 | turquoise   | 1549   | 1548.53 | 0.997119 | 0.000186 | 3.374   |
| gnl UG Ssc#S19540060 | navy        | 207.87 | 27.796  | 0.950561 | 0.013098 | 10.44   |
| gnl UG Ssc#S19540127 | turquoise   | 1476.6 | 1476.05 | 0.98337  | 0.002568 | 0.944   |
| gnl UG Ssc#S19540194 | turquoise   | 1109.1 | 1107.33 | 0.922437 | 0.025627 | 5.086   |
| gnl UG Ssc#S19540267 | lightcyan   | 160.72 | 7.38253 | 0.243906 | 0.692556 | 32.124  |
| gnl UG Ssc#S19540289 | red         | 258.96 | 47.2962 | 0.971405 | 0.005779 | 14.52   |
| gnl UG Ssc#S19540314 | turquoise   | 1354.3 | 1353.64 | 0.960273 | 0.009448 | 14.904  |
| gnl UG Ssc#S19540415 | turquoise   | 759.09 | 756.478 | 0.819666 | 0.0894   | 9.598   |
| gnl UG Ssc#S19540428 | blue        | 297.14 | 140.648 | 0.973088 | 0.005278 | 15.48   |
| gnl UG Ssc#S19540474 | grey        | 197.01 | 12.0931 | 0.774652 | 0.123982 | 17.526  |
| gnl UG Ssc#S19540505 | blue        | 331.76 | 157.696 | 0.998865 | 4.59E-05 | 53.67   |
| gnl UG Ssc#S19540541 | turquoise   | 1485.1 | 1484.57 | 0.984833 | 0.002237 | 2.614   |
| gnl UG Ssc#S19540568 | turquoise   | 1563.7 | 1563.32 | 0.99823  | 8.94E-05 | 3.542   |
| gnl UG Ssc#S19540688 | greenyellow | 58.627 | 4.91198 | -0.37729 | 0.531269 | 62.296  |
| gnl UG Ssc#S19540774 | blue        | 326.61 | 154.497 | 0.994041 | 0.000552 | 55.412  |
| gnl UG Ssc#S19540874 | turquoise   | 595.79 | 592.753 | 0.771692 | 0.126372 | 0.814   |
| gnl UG Ssc#S19540920 | turquoise   | 1553.6 | 1553.18 | 0.996528 | 0.000245 | 0.708   |
| gnl UG Ssc#S19540934 | pink        | 148.37 | 29.1164 | 0.895529 | 0.039893 | 41.954  |
| gnl UG Ssc#S19541038 | turquoise   | 1501.8 | 1501.39 | 0.989054 | 0.001372 | 31.836  |
| gnl UG Ssc#S19541067 | salmon      | 98.478 | 7.30517 | 0.686142 | 0.20084  | 53.544  |
| gnl UG Ssc#S19541103 | turquoise   | 1242.8 | 1242.06 | 0.939654 | 0.017634 | 62.64   |
| gnl UG Ssc#S19541195 | blue        | 341.72 | 133.911 | 0.961343 | 0.009071 | 12.83   |
| gnl UG Ssc#S19541250 | turquoise   | 1530.6 | 1530.05 | 0.994383 | 0.000505 | 2.118   |
| gnl UG Ssc#S19541354 | turquoise   | 1313.2 | 1312.61 | 0.953403 | 0.01199  | 3.936   |
| gnl UG Ssc#S19541498 | brown       | 322.5  | 101.419 | 0.923754 | 0.024982 | 20.452  |
| gnl UG Ssc#S19541523 | turquoise   | 761.13 | 759.029 | 0.827964 | 0.083411 | 26.918  |
| gnl UG Ssc#S19541571 | turquoise   | 1383.5 | 1383.04 | 0.966994 | 0.007163 | 8.498   |
| gnl UG Ssc#S19541572 | yellow      | 199.75 | 68.6394 | 0.937595 | 0.018538 | 29.966  |
| gnl UG Ssc#S19541579 | lightyellow | 301.97 | 25.7587 | 0.992029 | 0.000853 | 30.722  |
| gnl UG Ssc#S19541658 | purple      | 226.36 | 34.4201 | 0.987935 | 0.001588 | 21.17   |
| gnl UG Ssc#S19541682 | turquoise   | 1553.6 | 1553.18 | 0.996528 | 0.000245 | 2.55    |
| gnl UG Ssc#S19541687 | darkgreen   | 224.44 | 20.7408 | 0.960103 | 0.009509 | 15.13   |
| gnl UG Ssc#S19541728 | turquoise   | 1214.4 | 1213.22 | 0.93549  | 0.019477 | 21.472  |
| gnl UG Ssc#S19541809 | turquoise   | 725.08 | 718.759 | 0.814235 | 0.093388 | 17.276  |
| gnl UG Ssc#S19541855 | yellow      | 181.51 | 62.5498 | 0.908083 | 0.032987 | 48.014  |

|                      |               |        |         |          |          |         |
|----------------------|---------------|--------|---------|----------|----------|---------|
| gnl UG Ssc#S19541858 | turquoise     | 1507.4 | 1506.94 | 0.990135 | 0.001174 | 1.504   |
| gnl UG Ssc#S19541978 | turquoise     | 546.05 | 541.223 | 0.76144  | 0.134755 | 6.302   |
| gnl UG Ssc#S19541992 | turquoise     | 1488.8 | 1488.2  | 0.988526 | 0.001473 | 10.666  |
| gnl UG Ssc#S19542004 | turquoise     | 421.37 | 409.444 | 0.693823 | 0.19376  | 82.262  |
| gnl UG Ssc#S19542017 | turquoise     | 1506.5 | 1506.07 | 0.987613 | 0.001652 | 27.398  |
| gnl UG Ssc#S19542021 | turquoise     | 705.17 | 699.172 | 0.812092 | 0.094976 | 16.028  |
| gnl UG Ssc#S19542031 | darkturquoise | 226.64 | 17.97   | 0.996268 | 0.000274 | 153.76  |
| gnl UG Ssc#S19542061 | blue          | 347.71 | 149.955 | 0.98747  | 0.001681 | 174.058 |
| gnl UG Ssc#S19542087 | salmon        | 166.23 | 28.0735 | 0.966869 | 0.007203 | 50.146  |
| gnl UG Ssc#S19542228 | purple        | 163.99 | 21.4509 | 0.867133 | 0.056965 | 17.324  |
| gnl UG Ssc#S19542246 | salmon        | 109.32 | 25.1732 | 0.938235 | 0.018255 | 21.844  |
| gnl UG Ssc#S19542276 | turquoise     | 1361.7 | 1360.7  | 0.968913 | 0.006549 | 8.996   |
| gnl UG Ssc#S19542298 | yellow        | 204.26 | 66.9201 | 0.93571  | 0.019379 | 47.216  |
| gnl UG Ssc#S19542401 | turquoise     | 1542.3 | 1541.91 | 0.994193 | 0.000531 | 4.824   |
| gnl UG Ssc#S19542447 | turquoise     | 1566.7 | 1566.27 | 0.998795 | 5.02E-05 | 14.392  |
| gnl UG Ssc#S19542511 | purple        | 208.28 | 35.8356 | 0.994118 | 0.000541 | 52.162  |
| gnl UG Ssc#S19542525 | turquoise     | 1491.3 | 1490.81 | 0.987092 | 0.001757 | 89.338  |
| gnl UG Ssc#S19542616 | turquoise     | 603.28 | 598.394 | 0.774389 | 0.124195 | 13.116  |
| gnl UG Ssc#S19542622 | yellow        | 260.76 | 65.4981 | 0.922844 | 0.025427 | 43.896  |
| gnl UG Ssc#S19542648 | turquoise     | 1406.5 | 1405.62 | 0.97493  | 0.004747 | 9.86    |
| gnl UG Ssc#S19542649 | blue          | 340.54 | 154.905 | 0.99489  | 0.000438 | 191.984 |
| gnl UG Ssc#S19542661 | blue          | 205.7  | 89.7791 | 0.872899 | 0.053346 | 2.486   |
| gnl UG Ssc#S19542674 | turquoise     | 1570.6 | 1570.25 | 0.99988  | 1.57E-06 | 10.214  |
| gnl UG Ssc#S19542684 | darkred       | 71.432 | 12.5939 | 0.944602 | 0.015521 | 135.568 |
| gnl UG Ssc#S19542685 | turquoise     | 1534.4 | 1533.87 | 0.995259 | 0.000392 | 8.124   |
| gnl UG Ssc#S19542749 | turquoise     | 336.66 | 327.624 | 0.630449 | 0.254197 | 59.058  |
| gnl UG Ssc#S19542751 | brown         | 256.38 | 95.0349 | 0.925008 | 0.024373 | 50.494  |
| gnl UG Ssc#S19542771 | turquoise     | 1438.1 | 1437.65 | 0.976776 | 0.004234 | 5.916   |
| gnl UG Ssc#S19542862 | turquoise     | 1355.7 | 1355.12 | 0.962015 | 0.008836 | 23.498  |
| gnl UG Ssc#S19542887 | turquoise     | 661.37 | 654.377 | 0.794631 | 0.108214 | 0.464   |
| gnl UG Ssc#S19542900 | turquoise     | 1038.6 | 1037.68 | 0.900618 | 0.037043 | 0.682   |
| gnl UG Ssc#S19543384 | turquoise     | 1453.2 | 1452.68 | 0.982517 | 0.002768 | 33.168  |
| gnl UG Ssc#S19543409 | navy          | 285.71 | 26.3161 | 0.931571 | 0.021266 | 6.646   |
| gnl UG Ssc#S19543418 | turquoise     | 1471.9 | 1471.51 | 0.981636 | 0.002979 | 47.638  |
| gnl UG Ssc#S19544231 | turquoise     | 1448.9 | 1448.41 | 0.97928  | 0.003569 | 13.148  |
| gnl UG Ssc#S19544740 | turquoise     | 1293.4 | 1292.18 | 0.957189 | 0.010565 | 15.67   |
| gnl UG Ssc#S19544906 | magenta       | 312.88 | 34.508  | 0.935655 | 0.019403 | 50.86   |
| gnl UG Ssc#S19545017 | turquoise     | 1454.1 | 1453.45 | 0.982014 | 0.002888 | 21.208  |
| gnl UG Ssc#S19545319 | turquoise     | 1485.6 | 1485.05 | 0.986851 | 0.001806 | 2.44    |
| gnl UG Ssc#S19545362 | pink          | 127.97 | 31.1111 | 0.901763 | 0.036411 | 64.14   |
| gnl UG Ssc#S19545397 | navy          | 176.94 | 20.5665 | 0.878773 | 0.049736 | 57.346  |
| gnl UG Ssc#S19545449 | turquoise     | 1556.3 | 1555.89 | 0.998302 | 8.40E-05 | 45.494  |
| gnl UG Ssc#S19545458 | turquoise     | 264.09 | 253.571 | 0.584958 | 0.300186 | 18.886  |
| gnl UG Ssc#S19545494 | turquoise     | 1534.1 | 1533.56 | 0.994954 | 0.00043  | 5.248   |
| gnl UG Ssc#S19545503 | turquoise     | 1397.2 | 1396.25 | 0.974795 | 0.004785 | 11.226  |
| gnl UG Ssc#S19545587 | turquoise     | 1509.8 | 1509.44 | 0.989178 | 0.001349 | 2.248   |
| gnl UG Ssc#S19545599 | turquoise     | 1549.9 | 1549.48 | 0.996014 | 0.000302 | 10.02   |
| gnl UG Ssc#S19545642 | greenyellow   | 49.097 | 4.57481 | 0.60775  | 0.276892 | 75.184  |

|                      |               |        |         |          |          |         |
|----------------------|---------------|--------|---------|----------|----------|---------|
| gnl UG Ssc#S19545689 | turquoise     | 1448.9 | 1448.45 | 0.982617 | 0.002744 | 2.22    |
| gnl UG Ssc#S19545704 | turquoise     | 1500.4 | 1499.85 | 0.987497 | 0.001675 | 9.878   |
| gnl UG Ssc#S19545759 | turquoise     | 1492.5 | 1492.02 | 0.98521  | 0.002154 | 3.13    |
| gnl UG Ssc#S19545784 | turquoise     | 905.33 | 902.732 | 0.876207 | 0.051303 | 16.086  |
| gnl UG Ssc#S19545891 | darkturquoise | 204.24 | 16.7869 | 0.972876 | 0.005341 | 47.276  |
| gnl UG Ssc#S19545902 | turquoise     | 1078.2 | 1076.06 | 0.915498 | 0.02911  | 60.632  |
| gnl UG Ssc#S19545927 | turquoise     | 1473.8 | 1473.41 | 0.98551  | 0.002089 | 5.636   |
| gnl UG Ssc#S19545946 | turquoise     | 1553.6 | 1553.18 | 0.996528 | 0.000245 | 2.126   |
| gnl UG Ssc#S19545977 | turquoise     | 60.709 | 40.9897 | 0.21497  | 0.728415 | 95.3    |
| gnl UG Ssc#S19545994 | turquoise     | 1552.3 | 1551.87 | 0.997608 | 0.00014  | 3.232   |
| gnl UG Ssc#S19546082 | turquoise     | 199.1  | 181.45  | 0.50073  | 0.390197 | 60.314  |
| gnl UG Ssc#S19546091 | midnightblue  | 224.59 | 35.2596 | 0.988818 | 0.001417 | 27.744  |
| gnl UG Ssc#S19546106 | turquoise     | 133.39 | 81.3854 | 0.321315 | 0.598042 | 225.138 |
| gnl UG Ssc#S19546116 | turquoise     | 1563.1 | 1562.67 | 0.999244 | 2.49E-05 | 6.59    |
| gnl UG Ssc#S19546121 | darkturquoise | 151.88 | 14.5246 | 0.932239 | 0.020957 | 9.084   |
| gnl UG Ssc#S19546165 | turquoise     | 1398.8 | 1398.36 | 0.973716 | 0.005095 | 18.182  |
| gnl UG Ssc#S19546179 | lightcyan     | 285.42 | 26.4161 | 0.996026 | 0.000301 | 12.818  |
| gnl UG Ssc#S19546199 | turquoise     | 1553.6 | 1553.18 | 0.996528 | 0.000245 | 1.654   |
| gnl UG Ssc#S19546257 | yellow        | 239.61 | 71.6123 | 0.937784 | 0.018454 | 172.382 |
| gnl UG Ssc#S19546269 | turquoise     | 1052.6 | 1051.54 | 0.900105 | 0.037328 | 13.586  |
| gnl UG Ssc#S19546309 | turquoise     | 298.54 | 292.615 | 0.646943 | 0.238038 | 9.454   |
| gnl UG Ssc#S19546334 | turquoise     | 1525.3 | 1524.88 | 0.991554 | 0.000931 | 18.626  |
| gnl UG Ssc#S19546570 | turquoise     | 1518   | 1517.38 | 0.993179 | 0.000676 | 10.098  |
| gnl UG Ssc#S19546988 | green         | 187.59 | 28.1822 | 0.818855 | 0.089993 | 63.078  |
| gnl UG Ssc#S19547504 | turquoise     | 1364.3 | 1363.23 | 0.968007 | 0.006836 | 60.588  |
| gnl UG Ssc#S19547688 | turquoise     | 1124.8 | 1123.07 | 0.92206  | 0.025812 | 29.838  |
| gnl UG Ssc#S19547691 | navy          | 286.79 | 32.224  | 0.981104 | 0.003109 | 77.132  |
| gnl UG Ssc#S19547820 | turquoise     | 1498   | 1497.62 | 0.988237 | 0.001529 | 3.336   |
| gnl UG Ssc#S19547860 | turquoise     | 1380.3 | 1379.55 | 0.973116 | 0.00527  | 47.332  |
| gnl UG Ssc#S19547872 | turquoise     | 1436.7 | 1436.04 | 0.98146  | 0.003022 | 1.8     |
| gnl UG Ssc#S19547874 | turquoise     | 1553.6 | 1553.18 | 0.996528 | 0.000245 | 3.07    |
| gnl UG Ssc#S19547916 | yellow        | 203.28 | 62.7253 | 0.91742  | 0.028131 | 11.756  |
| gnl UG Ssc#S19548011 | lightyellow   | 319.67 | 24.7697 | 0.985391 | 0.002115 | 15.39   |
| gnl UG Ssc#S19548031 | turquoise     | 1417   | 1416.15 | 0.976499 | 0.004309 | 32.576  |
| gnl UG Ssc#S19548276 | grey60        | 268.84 | 30.4199 | 0.979441 | 0.003528 | 36.648  |
| gnl UG Ssc#S19548366 | turquoise     | 1499.1 | 1498.52 | 0.990546 | 0.001102 | 2.838   |
| gnl UG Ssc#S19548981 | turquoise     | 1513.8 | 1513.25 | 0.992257 | 0.000817 | 272.796 |
| gnl UG Ssc#S19549069 | turquoise     | 1553.6 | 1553.18 | 0.996528 | 0.000245 | 3.024   |
| gnl UG Ssc#S19549096 | turquoise     | 1415.5 | 1414.98 | 0.973933 | 0.005032 | 2.786   |
| gnl UG Ssc#S19549165 | salmon        | 118.57 | 21.6111 | 0.908126 | 0.032965 | 57.038  |
| gnl UG Ssc#S19549209 | brown         | 243.82 | 121.124 | 0.981174 | 0.003092 | 30.982  |
| gnl UG Ssc#S19549226 | turquoise     | 1147.8 | 1146.31 | 0.928244 | 0.022824 | 11.266  |
| gnl UG Ssc#S19549265 | turquoise     | 1028.9 | 1026.17 | 0.901255 | 0.036691 | 10.746  |
| gnl UG Ssc#S19549267 | turquoise     | 151.45 | 132.872 | 0.461562 | 0.433912 | 5.616   |
| gnl UG Ssc#S19549286 | darkgreen     | 258.16 | 6.69102 | 0.696467 | 0.191341 | 9.692   |
| gnl UG Ssc#S19549310 | turquoise     | 1556.4 | 1555.93 | 0.997335 | 0.000165 | 7.09    |
| gnl UG Ssc#S19550112 | turquoise     | 1516   | 1515.49 | 0.992402 | 0.000794 | 0.836   |
| gnl UG Ssc#S19550176 | tan           | 331.63 | 39.2391 | 0.988178 | 0.00154  | 4.236   |

|                      |              |        |         |          |          |         |
|----------------------|--------------|--------|---------|----------|----------|---------|
| gnl UG Ssc#S19550257 | brown        | 289.22 | 119.173 | 0.972913 | 0.00533  | 5.812   |
| gnl UG Ssc#S19550604 | lightyellow  | 305.12 | 25.0005 | 0.981892 | 0.002917 | 16.902  |
| gnl UG Ssc#S20942207 | green        | 274.09 | 31.4307 | 0.842799 | 0.07303  | 32.126  |
| gnl UG Ssc#S20945025 | magenta      | 331.49 | 43.3711 | 0.986928 | 0.001791 | 106.732 |
| gnl UG Ssc#S20945959 | turquoise    | 1543.5 | 1543.03 | 0.996514 | 0.000247 | 7.616   |
| gnl UG Ssc#S20946380 | greenyellow  | 175.64 | 16.0376 | 0.893193 | 0.041224 | 28.994  |
| gnl UG Ssc#S20947929 | darkgreen    | 266.79 | 23.9303 | 0.995329 | 0.000383 | 10.62   |
| gnl UG Ssc#S20958918 | turquoise    | 1553.6 | 1553.18 | 0.996528 | 0.000245 | 0.566   |
| gnl UG Ssc#S21554547 | grey         | 321.29 | 16.3765 | 0.946039 | 0.014925 | 24.986  |
| gnl UG Ssc#S21557354 | turquoise    | 1547.5 | 1547.14 | 0.995807 | 0.000326 | 3.728   |
| gnl UG Ssc#S21575274 | turquoise    | 1517.7 | 1517.34 | 0.99021  | 0.001161 | 4.914   |
| gnl UG Ssc#S21579411 | blue         | 341.33 | 150.581 | 0.988245 | 0.001527 | 33.182  |
| gnl UG Ssc#S21579717 | green        | 75.626 | 19.6113 | 0.730602 | 0.160897 | 0.838   |
| gnl UG Ssc#S22271795 | turquoise    | 175.55 | 140.64  | 0.406152 | 0.497463 | 29.64   |
| gnl UG Ssc#S22272079 | turquoise    | 64.214 | 39.0173 | 0.195695 | 0.752433 | 5.118   |
| gnl UG Ssc#S22272334 | turquoise    | 1277.9 | 1276.8  | 0.954864 | 0.011433 | 18.748  |
| gnl UG Ssc#S22273127 | blue         | 300.47 | 140.024 | 0.972695 | 0.005394 | 2.868   |
| gnl UG Ssc#S22273263 | blue         | 314.63 | 117.33  | 0.930908 | 0.021573 | 8.656   |
| gnl UG Ssc#S22274163 | turquoise    | 1012.2 | 1009.92 | 0.90191  | 0.036331 | 12.592  |
| gnl UG Ssc#S22274609 | turquoise    | 1216.4 | 1215.26 | 0.941228 | 0.016952 | 13.816  |
| gnl UG Ssc#S22275000 | brown        | 201.46 | 108.258 | 0.95502  | 0.011374 | 38.33   |
| gnl UG Ssc#S22275082 | turquoise    | 1489.5 | 1488.88 | 0.987154 | 0.001744 | 18.65   |
| gnl UG Ssc#S22275237 | blue         | 329.76 | 135.117 | 0.963067 | 0.008473 | 11.808  |
| gnl UG Ssc#S22275831 | lightyellow  | 241.74 | 20.9003 | 0.927347 | 0.02325  | 7.346   |
| gnl UG Ssc#S22276105 | turquoise    | 1539.4 | 1538.95 | 0.996081 | 0.000294 | 3.342   |
| gnl UG Ssc#S22276551 | turquoise    | 1003.7 | 1000.98 | 0.894906 | 0.040247 | 10.992  |
| gnl UG Ssc#S22277516 | brown        | 248.89 | 112.371 | 0.964227 | 0.008078 | 68.002  |
| gnl UG Ssc#S22278253 | midnightblue | 209.59 | 32.302  | 0.971182 | 0.005847 | 9.656   |
| gnl UG Ssc#S22278936 | turquoise    | 1551.1 | 1550.77 | 0.996177 | 0.000284 | 7.758   |
| gnl UG Ssc#S22279005 | turquoise    | 1488.1 | 1487.69 | 0.984956 | 0.00221  | 1.938   |
| gnl UG Ssc#S22279857 | blue         | 236.52 | 108.322 | 0.913704 | 0.030034 | 66.396  |
| gnl UG Ssc#S22280355 | turquoise    | 1551.8 | 1551.33 | 0.997472 | 0.000153 | 9.862   |
| gnl UG Ssc#S22281441 | turquoise    | 1317.4 | 1316.16 | 0.959191 | 0.009835 | 283.24  |
| gnl UG Ssc#S22282278 | salmon       | 82.104 | 18.7829 | 0.859708 | 0.061734 | 1.822   |
| gnl UG Ssc#S22282766 | turquoise    | 1302.5 | 1301.3  | 0.959425 | 0.009751 | 8.684   |
| gnl UG Ssc#S22282893 | lightgreen   | 71.354 | 12.4689 | 0.924388 | 0.024674 | 25.89   |
| gnl UG Ssc#S22283333 | navy         | 273.06 | 28.4683 | 0.954208 | 0.011682 | 43.128  |
| gnl UG Ssc#S22283855 | turquoise    | 1546.1 | 1545.58 | 0.996236 | 0.000277 | 1.458   |
| gnl UG Ssc#S22284475 | turquoise    | 626.18 | 616.671 | 0.774209 | 0.124339 | 31.142  |
| gnl UG Ssc#S22284504 | green        | 97.754 | 27.9117 | 0.830892 | 0.081329 | 8.032   |
| gnl UG Ssc#S22286222 | purple       | 197.77 | 34.0036 | 0.982453 | 0.002783 | 71.734  |
| gnl UG Ssc#S22287254 | lightyellow  | 276.68 | 19.4563 | 0.933151 | 0.020539 | 86.922  |
| gnl UG Ssc#S22287785 | turquoise    | 1387.1 | 1386.57 | 0.967489 | 0.007002 | 0.566   |
| gnl UG Ssc#S22287912 | turquoise    | 1469.3 | 1468.9  | 0.981477 | 0.003018 | 5.694   |
| gnl UG Ssc#S22288091 | turquoise    | 1558.4 | 1557.97 | 0.997029 | 0.000194 | 4.982   |
| gnl UG Ssc#S22289618 | turquoise    | 1350.8 | 1349.74 | 0.966925 | 0.007185 | 11.776  |
| gnl UG Ssc#S22290406 | turquoise    | 1422.8 | 1422.18 | 0.977178 | 0.004125 | 14.64   |
| gnl UG Ssc#S22300839 | turquoise    | 1567.3 | 1566.95 | 0.99891  | 4.32E-05 | 14.152  |

|                      |              |        |         |          |          |         |
|----------------------|--------------|--------|---------|----------|----------|---------|
| gnl UG Ssc#S22311415 | turquoise    | 1488.1 | 1487.46 | 0.988756 | 0.001429 | 12.798  |
| gnl UG Ssc#S22313154 | turquoise    | 1445.4 | 1444.69 | 0.982652 | 0.002736 | 602.086 |
| gnl UG Ssc#S22314469 | turquoise    | 1458.8 | 1458.3  | 0.97919  | 0.003592 | 5.808   |
| gnl UG Ssc#S22315401 | yellow       | 110.13 | 43.1498 | 0.819994 | 0.089161 | 12.998  |
| gnl UG Ssc#S22316206 | turquoise    | 1229.4 | 1227.98 | 0.941537 | 0.016819 | 49.502  |
| gnl UG Ssc#S22316499 | turquoise    | 1414.5 | 1413.71 | 0.974584 | 0.004845 | 3.914   |
| gnl UG Ssc#S22317157 | yellow       | 121.59 | 46.5707 | 0.814922 | 0.092881 | 22.84   |
| gnl UG Ssc#S23213478 | turquoise    | 1520.7 | 1520.36 | 0.990617 | 0.00109  | 2.078   |
| gnl UG Ssc#S23689580 | turquoise    | 1412.1 | 1411.41 | 0.974936 | 0.004745 | 6.576   |
| gnl UG Ssc#S23689635 | turquoise    | 1483.7 | 1483.28 | 0.984547 | 0.002301 | 8.492   |
| gnl UG Ssc#S23689648 | turquoise    | 1521.9 | 1521.45 | 0.993312 | 0.000656 | 9.13    |
| gnl UG Ssc#S23689683 | blue         | 332.97 | 151.67  | 0.989912 | 0.001214 | 12.634  |
| gnl UG Ssc#S23689697 | turquoise    | 1209.7 | 1208.41 | 0.938812 | 0.018001 | 3.042   |
| gnl UG Ssc#S23689699 | turquoise    | 1544.9 | 1544.5  | 0.994428 | 0.000499 | 2.5     |
| gnl UG Ssc#S23689759 | brown        | 261.66 | 124.035 | 0.985908 | 0.002004 | 7.258   |
| gnl UG Ssc#S23689765 | turquoise    | 1540.6 | 1540.13 | 0.995933 | 0.000311 | 24.946  |
| gnl UG Ssc#S23689779 | turquoise    | 1454.3 | 1453.83 | 0.983905 | 0.002445 | 2.99    |
| gnl UG Ssc#S23689821 | greenyellow  | 202.28 | 21.8044 | 0.988073 | 0.001561 | 19.002  |
| gnl UG Ssc#S23689827 | turquoise    | 72.812 | 50.7477 | 0.243435 | 0.693139 | 0.746   |
| gnl UG Ssc#S23689835 | turquoise    | 1548   | 1547.58 | 0.996272 | 0.000273 | 14.954  |
| gnl UG Ssc#S23689840 | green        | 109.74 | 25.286  | 0.802507 | 0.102178 | 46.58   |
| gnl UG Ssc#S23689853 | yellow       | 187.49 | 78.2152 | 0.977898 | 0.003931 | 25.24   |
| gnl UG Ssc#S23689871 | turquoise    | 687.59 | 679.418 | 0.798318 | 0.105375 | 8.03    |
| gnl UG Ssc#S23689938 | turquoise    | 1517.3 | 1516.78 | 0.993302 | 0.000657 | 6.154   |
| gnl UG Ssc#S23690002 | midnightblue | 235.45 | 34.8204 | 0.986586 | 0.001861 | 4.228   |
| gnl UG Ssc#S23690339 | turquoise    | 1482   | 1481.53 | 0.987176 | 0.00174  | 22.506  |
| gnl UG Ssc#S23690342 | royalblue    | 183.81 | 20.6675 | 0.948049 | 0.014103 | 38.92   |
| gnl UG Ssc#S23690384 | brown        | 262.12 | 123.847 | 0.984375 | 0.002339 | 3.594   |
| gnl UG Ssc#S23690435 | turquoise    | 1553.6 | 1553.18 | 0.996528 | 0.000245 | 1.558   |
| gnl UG Ssc#S23690458 | turquoise    | 1467.9 | 1467.31 | 0.984504 | 0.00231  | 7.168   |
| gnl UG Ssc#S23690475 | grey60       | 286.46 | 28.3535 | 0.964123 | 0.008113 | 124.482 |
| gnl UG Ssc#S23690513 | turquoise    | 952.23 | 951.304 | 0.889282 | 0.043482 | 9.674   |
| gnl UG Ssc#S23690535 | blue         | 345.6  | 150.953 | 0.988874 | 0.001406 | 46.724  |
| gnl UG Ssc#S23690544 | turquoise    | 1408.6 | 1408.13 | 0.972301 | 0.005511 | 17.958  |
| gnl UG Ssc#S23690802 | turquoise    | 296.29 | 283.549 | 0.616303 | 0.26828  | 63.54   |
| gnl UG Ssc#S23690807 | darkgreen    | 263.36 | 23.8431 | 0.993766 | 0.00059  | 5.534   |
| gnl UG Ssc#S23691069 | blue         | 290.77 | 133.05  | 0.96158  | 0.008988 | 100.79  |
| gnl UG Ssc#S23691229 | turquoise    | 1522.3 | 1521.85 | 0.992565 | 0.000769 | 39.258  |
| gnl UG Ssc#S23691231 | turquoise    | 1553.6 | 1553.18 | 0.996528 | 0.000245 | 0.85    |
| gnl UG Ssc#S23691372 | turquoise    | 1550.2 | 1549.79 | 0.996487 | 0.00025  | 13.828  |
| gnl UG Ssc#S23691718 | salmon       | 84.307 | 20.1737 | 0.883203 | 0.047068 | 86.056  |
| gnl UG Ssc#S23691825 | turquoise    | 1553.6 | 1553.18 | 0.996528 | 0.000245 | 1.748   |
| gnl UG Ssc#S23691900 | darkred      | 88.897 | 8.88421 | 0.79788  | 0.105711 | 59.768  |
| gnl UG Ssc#S23692548 | turquoise    | 1526   | 1525.62 | 0.991567 | 0.000928 | 10.994  |
| gnl UG Ssc#S23692648 | brown        | 208    | 99.5219 | 0.933477 | 0.02039  | 10.962  |
| gnl UG Ssc#S23692872 | turquoise    | 702.26 | 697.534 | 0.81413  | 0.093466 | 37.794  |
| gnl UG Ssc#S23693351 | turquoise    | 1040.7 | 1038.86 | 0.897735 | 0.03865  | 20.092  |
| gnl UG Ssc#S23693357 | lightyellow  | 304.67 | 25.4215 | 0.993466 | 0.000633 | 97.828  |

|                      |             |        |         |          |          |         |
|----------------------|-------------|--------|---------|----------|----------|---------|
| gnl UG Ssc#S23693410 | yellow      | 237.33 | 85.0757 | 0.998184 | 9.29E-05 | 137.158 |
| gnl UG Ssc#S23693714 | turquoise   | 1289.2 | 1287.89 | 0.955145 | 0.011327 | 108.168 |
| gnl UG Ssc#S23693871 | red         | 274.46 | 44.179  | 0.954219 | 0.011678 | 7.358   |
| gnl UG Ssc#S23694531 | turquoise   | 609.84 | 605.752 | 0.766788 | 0.130362 | 25.342  |
| gnl UG Ssc#S23694886 | turquoise   | 1524.3 | 1523.84 | 0.993398 | 0.000643 | 17.2    |
| gnl UG Ssc#S23694918 | turquoise   | 1529.6 | 1529.26 | 0.992875 | 0.000721 | 1.62    |
| gnl UG Ssc#S23694970 | greenyellow | 98.431 | 11.484  | 0.820911 | 0.088494 | 70.49   |
| gnl UG Ssc#S23695047 | green       | 207.37 | 50.9954 | 0.973961 | 0.005024 | 25.232  |
| gnl UG Ssc#S23695102 | brown       | 244.2  | 102.195 | 0.934647 | 0.019858 | 55.258  |
| gnl UG Ssc#S23695110 | turquoise   | 1554.2 | 1553.82 | 0.997114 | 0.000186 | 10.436  |
| gnl UG Ssc#S23695118 | turquoise   | 1529   | 1528.54 | 0.994901 | 0.000437 | 9.66    |
| gnl UG Ssc#S23695121 | turquoise   | 643.35 | 640.304 | 0.800202 | 0.103934 | 5.8     |
| gnl UG Ssc#S23695151 | turquoise   | 687.05 | 679.216 | 0.79981  | 0.104233 | 3.52    |
| gnl UG Ssc#S23695164 | turquoise   | 1111.5 | 1109.9  | 0.923838 | 0.024941 | 153.54  |
| gnl UG Ssc#S23695171 | turquoise   | 1546.8 | 1546.41 | 0.994769 | 0.000454 | 8.014   |
| gnl UG Ssc#S23695220 | turquoise   | 1259.7 | 1258.62 | 0.946012 | 0.014936 | 3.636   |
| gnl UG Ssc#S23695269 | blue        | 305.45 | 129.673 | 0.954984 | 0.011387 | 17.374  |
| gnl UG Ssc#S23695295 | blue        | 352.37 | 131.41  | 0.956747 | 0.010728 | 37.582  |
| gnl UG Ssc#S23695348 | turquoise   | 1140   | 1137.91 | 0.925385 | 0.024191 | 9.872   |
| gnl UG Ssc#S23695397 | turquoise   | 1380.8 | 1380.3  | 0.968429 | 0.006702 | 15.602  |
| gnl UG Ssc#S23695399 | salmon      | 154.36 | 28.8736 | 0.973844 | 0.005058 | 16.986  |
| gnl UG Ssc#S23695759 | grey        | 104.19 | 7.49351 | 0.248813 | 0.686501 | 27.258  |
| gnl UG Ssc#S23695762 | turquoise   | 172.56 | 167.05  | 0.531567 | 0.356571 | 15.504  |
| gnl UG Ssc#S23695768 | turquoise   | 1476.1 | 1475.63 | 0.983776 | 0.002475 | 3.246   |
| gnl UG Ssc#S23695825 | turquoise   | 1552   | 1551.52 | 0.997588 | 0.000142 | 27.456  |
| gnl UG Ssc#S23695896 | turquoise   | 1512.9 | 1512.31 | 0.992604 | 0.000763 | 58.644  |
| gnl UG Ssc#S23695912 | turquoise   | 1523.1 | 1522.71 | 0.99144  | 0.000949 | 2.528   |
| gnl UG Ssc#S23696008 | blue        | 300.64 | 142.856 | 0.976288 | 0.004368 | 15.606  |
| gnl UG Ssc#S23696033 | turquoise   | 1425.9 | 1425.1  | 0.97825  | 0.003838 | 13.172  |
| gnl UG Ssc#S23696561 | turquoise   | 1541.7 | 1541.24 | 0.996515 | 0.000247 | 5.696   |
| gnl UG Ssc#S23696616 | brown       | 111.83 | 58.7664 | 0.825819 | 0.084948 | 127.484 |
| gnl UG Ssc#S23696659 | turquoise   | 1541.1 | 1540.66 | 0.995505 | 0.000362 | 11.444  |
| gnl UG Ssc#S23696666 | turquoise   | 1554.2 | 1553.78 | 0.997635 | 0.000138 | 20.81   |
| gnl UG Ssc#S23696689 | turquoise   | 1371.6 | 1370.56 | 0.968993 | 0.006524 | 39.612  |
| gnl UG Ssc#S23696693 | yellow      | 241.54 | 76.7197 | 0.960918 | 0.00922  | 21.644  |
| gnl UG Ssc#S23696740 | turquoise   | 123.49 | 82.5031 | 0.310902 | 0.61062  | 21.048  |
| gnl UG Ssc#S23696826 | turquoise   | 1272.8 | 1271.56 | 0.951009 | 0.012921 | 40.99   |
| gnl UG Ssc#S23696828 | turquoise   | 1542.5 | 1542.06 | 0.996286 | 0.000272 | 16.078  |
| gnl UG Ssc#S23696834 | turquoise   | 1552.5 | 1552.09 | 0.996524 | 0.000246 | 24.928  |
| gnl UG Ssc#S23697317 | turquoise   | 1549.6 | 1549.16 | 0.996361 | 0.000263 | 23.786  |
| gnl UG Ssc#S23697383 | turquoise   | 536.58 | 531.791 | 0.759105 | 0.136686 | 46.946  |
| gnl UG Ssc#S23697414 | turquoise   | 602.23 | 598.221 | 0.769913 | 0.127816 | 6.894   |
| gnl UG Ssc#S23697660 | turquoise   | 403.47 | 398.881 | 0.7117   | 0.177569 | 13.504  |
| gnl UG Ssc#S23697932 | blue        | 341.79 | 141.727 | 0.974843 | 0.004772 | 82.268  |
| gnl UG Ssc#S23697971 | turquoise   | 1405.8 | 1404.97 | 0.976429 | 0.004329 | 37.94   |
| gnl UG Ssc#S23697986 | turquoise   | 1554.6 | 1554.2  | 0.998136 | 9.66E-05 | 32.59   |
| gnl UG Ssc#S23698009 | turquoise   | 1520   | 1519.42 | 0.992651 | 0.000756 | 6.44    |
| gnl UG Ssc#S23698058 | turquoise   | 1228.8 | 1227.32 | 0.944689 | 0.015485 | 18.248  |



|                      |             |        |         |          |          |         |
|----------------------|-------------|--------|---------|----------|----------|---------|
| gnl UG Ssc#S23698110 | turquoise   | 1309.2 | 1308.49 | 0.956183 | 0.010938 | 24.696  |
| gnl UG Ssc#S23698294 | turquoise   | 1549.4 | 1548.96 | 0.995243 | 0.000394 | 6.454   |
| gnl UG Ssc#S23698716 | lightyellow | 253.84 | 16.8735 | 0.894914 | 0.040242 | 41.832  |
| gnl UG Ssc#S23698749 | turquoise   | 761.09 | 758.621 | 0.824653 | 0.085786 | 1.374   |
| gnl UG Ssc#S23698752 | turquoise   | 1504.7 | 1504.15 | 0.990978 | 0.001027 | 54.242  |
| gnl UG Ssc#S23698843 | blue        | 300.08 | 144.308 | 0.978575 | 0.003752 | 8.882   |
| gnl UG Ssc#S23699327 | turquoise   | 1571.7 | 1571.32 | 0.999808 | 3.20E-06 | 5.302   |
| gnl UG Ssc#S23699362 | turquoise   | 1250.3 | 1248.94 | 0.947081 | 0.014497 | 6.494   |
| gnl UG Ssc#S23699367 | turquoise   | 1513.1 | 1512.66 | 0.991862 | 0.00088  | 1.904   |
| gnl UG Ssc#S23699463 | turquoise   | 1550.4 | 1549.9  | 0.997646 | 0.000137 | 12.738  |
| gnl UG Ssc#S23699748 | greenyellow | 75.84  | 5.75037 | -0.50437 | 0.386187 | 5.416   |
| gnl UG Ssc#S23699771 | greenyellow | 73.317 | 6.89755 | -0.55132 | 0.335431 | 20.426  |
| gnl UG Ssc#S23699793 | turquoise   | 92.523 | 44.4906 | 0.21269  | 0.731251 | 21.336  |
| gnl UG Ssc#S23699804 | turquoise   | 1529.2 | 1528.71 | 0.99465  | 0.000469 | 15.036  |
| gnl UG Ssc#S23699836 | pink        | 212.77 | 46.8988 | 0.994194 | 0.000531 | 25.204  |
| gnl UG Ssc#S23699859 | turquoise   | 1547.7 | 1547.23 | 0.996041 | 0.000299 | 77.888  |
| gnl UG Ssc#S23699860 | turquoise   | 1429.3 | 1428.73 | 0.977225 | 0.004112 | 4.678   |
| gnl UG Ssc#S23700002 | yellow      | 239.99 | 79.2516 | 0.974642 | 0.004829 | 73.072  |
| gnl UG Ssc#S23700108 | purple      | 213.05 | 28.5153 | 0.938712 | 0.018045 | 5.782   |
| gnl UG Ssc#S23700159 | black       | 284.81 | 40.6938 | 0.973422 | 0.00518  | 59.348  |
| gnl UG Ssc#S23700414 | turquoise   | 1483.8 | 1483.28 | 0.985694 | 0.00205  | 5.298   |
| gnl UG Ssc#S23700455 | turquoise   | 1546   | 1545.57 | 0.996562 | 0.000242 | 18.534  |
| gnl UG Ssc#S23700560 | turquoise   | 1558.8 | 1558.43 | 0.997223 | 0.000176 | 3.54    |
| gnl UG Ssc#S23701101 | turquoise   | 1522.1 | 1521.72 | 0.990673 | 0.00108  | 11.02   |
| gnl UG Ssc#S23701109 | turquoise   | 1466.2 | 1465.65 | 0.98102  | 0.00313  | 51.358  |
| gnl UG Ssc#S23701124 | pink        | 146.11 | 32.4915 | 0.91481  | 0.029464 | 4.1     |
| gnl UG Ssc#S23701146 | darkred     | 72.975 | 9.23973 | 0.771491 | 0.126536 | 5.23    |
| gnl UG Ssc#S23701149 | turquoise   | 902.81 | 900.759 | 0.880393 | 0.048755 | 11.388  |
| gnl UG Ssc#S23701211 | turquoise   | 1489.9 | 1489.28 | 0.988874 | 0.001406 | 26.722  |
| gnl UG Ssc#S23701220 | turquoise   | 1553.6 | 1553.18 | 0.996528 | 0.000245 | 1.558   |
| gnl UG Ssc#S23701295 | turquoise   | 1374.1 | 1373.11 | 0.970373 | 0.006094 | 295.582 |
| gnl UG Ssc#S23701300 | blue        | 315.85 | 131.194 | 0.956716 | 0.01074  | 25.292  |
| gnl UG Ssc#S23755031 | yellow      | 163.28 | 69.234  | 0.938183 | 0.018278 | 24.904  |
| gnl UG Ssc#S23755238 | turquoise   | 1411.4 | 1410.63 | 0.976377 | 0.004343 | 8.354   |
| gnl UG Ssc#S23755367 | turquoise   | 1546   | 1545.58 | 0.99707  | 0.00019  | 28.528  |
| gnl UG Ssc#S23755372 | turquoise   | 90.848 | 65.2555 | 0.292927 | 0.632439 | 3.322   |
| gnl UG Ssc#S23755373 | royalblue   | 188.72 | 24.5365 | 0.982595 | 0.002749 | 12.974  |
| gnl UG Ssc#S23755435 | turquoise   | 1548.9 | 1548.5  | 0.995486 | 0.000364 | 270.42  |
| gnl UG Ssc#S23755540 | turquoise   | 933.99 | 931.667 | 0.87459  | 0.052298 | 42.98   |
| gnl UG Ssc#S23755550 | turquoise   | 310.29 | 300.186 | 0.61301  | 0.271587 | 40.802  |
| gnl UG Ssc#S23755551 | yellow      | 173.86 | 67.2629 | 0.928528 | 0.022689 | 62.498  |
| gnl UG Ssc#S23755686 | turquoise   | 1284.7 | 1283.98 | 0.949992 | 0.013323 | 2.626   |
| gnl UG Ssc#S23756069 | turquoise   | 1387.7 | 1386.84 | 0.973127 | 0.005267 | 5.316   |
| gnl UG Ssc#S23756098 | green       | 187.08 | 48.6243 | 0.981442 | 0.003026 | 84.108  |
| gnl UG Ssc#S23756108 | turquoise   | 1512.3 | 1511.88 | 0.991468 | 0.000945 | 7.604   |
| gnl UG Ssc#S23756754 | turquoise   | 432.54 | 413.644 | 0.670882 | 0.215112 | 16.35   |
| gnl UG Ssc#S23756816 | turquoise   | 1366   | 1365.13 | 0.96989  | 0.006243 | 11.58   |
| gnl UG Ssc#S23756850 | pink        | 262.88 | 45.5012 | 0.983669 | 0.002499 | 90.372  |

|                      |             |        |         |          |          |         |
|----------------------|-------------|--------|---------|----------|----------|---------|
| gnl UG Ssc#S23756925 | turquoise   | 1343.4 | 1342.34 | 0.962322 | 0.00873  | 19.36   |
| gnl UG Ssc#S23756992 | yellow      | 143.83 | 55.9624 | 0.87227  | 0.053737 | 48.908  |
| gnl UG Ssc#S23757023 | turquoise   | 1557.6 | 1557.18 | 0.997461 | 0.000154 | 5.958   |
| gnl UG Ssc#S23757412 | turquoise   | 1538   | 1537.52 | 0.996016 | 0.000302 | 7.944   |
| gnl UG Ssc#S23757521 | lightyellow | 287.9  | 23.7353 | 0.976264 | 0.004374 | 6.838   |
| gnl UG Ssc#S23757528 | turquoise   | 1529.6 | 1529.16 | 0.993541 | 0.000623 | 10.62   |
| gnl UG Ssc#S23757556 | tan         | 312.21 | 40.7333 | 0.997194 | 0.000178 | 21.012  |
| gnl UG Ssc#S23757653 | magenta     | 324.75 | 44.6007 | 0.994245 | 0.000524 | 14.442  |
| gnl UG Ssc#S23757695 | turquoise   | 249.05 | 227.754 | 0.53983  | 0.347687 | 44.472  |
| gnl UG Ssc#S23757708 | turquoise   | 1553.6 | 1553.18 | 0.996528 | 0.000245 | 0.708   |
| gnl UG Ssc#S23758068 | turquoise   | 1460.5 | 1460.01 | 0.98001  | 0.003383 | 8.088   |
| gnl UG Ssc#S23758125 | turquoise   | 1294.6 | 1293.57 | 0.958839 | 0.009962 | 220.986 |
| gnl UG Ssc#S23758306 | turquoise   | 1553.6 | 1553.18 | 0.996528 | 0.000245 | 1.322   |
| gnl UG Ssc#S23758340 | lightcyan   | 180.17 | 7.54151 | 0.333928 | 0.582869 | 7.666   |
| gnl UG Ssc#S23758349 | turquoise   | 294.49 | 267.196 | 0.562177 | 0.323945 | 24.84   |
| gnl UG Ssc#S23758422 | turquoise   | 123.49 | 106.71  | 0.404389 | 0.499515 | 75.588  |
| gnl UG Ssc#S23758429 | tan         | 324.52 | 38.1727 | 0.981253 | 0.003073 | 12.306  |
| gnl UG Ssc#S23758705 | black       | 269.94 | 40.603  | 0.9913   | 0.000973 | 75.552  |
| gnl UG Ssc#S23758834 | turquoise   | 1562.8 | 1562.4  | 0.998281 | 8.55E-05 | 1.936   |
| gnl UG Ssc#S23758881 | turquoise   | 1518.2 | 1517.75 | 0.992573 | 0.000767 | 32.7    |
| gnl UG Ssc#S23758924 | turquoise   | 104.36 | 36.7239 | 0.061578 | 0.921646 | 24.874  |
| gnl UG Ssc#S23758929 | turquoise   | 1557.4 | 1557.02 | 0.997272 | 0.000171 | 18.958  |
| gnl UG Ssc#S23758940 | turquoise   | 1565.2 | 1564.79 | 0.99915  | 2.97E-05 | 6.568   |
| gnl UG Ssc#S23758955 | green       | 112.75 | 15.8567 | 0.660761 | 0.224726 | 66.424  |
| gnl UG Ssc#S23759053 | turquoise   | 1373.2 | 1372.43 | 0.965606 | 0.007617 | 17.656  |
| gnl UG Ssc#S23759508 | purple      | 183.09 | 33.391  | 0.974987 | 0.004731 | 760.134 |
| gnl UG Ssc#S23759611 | turquoise   | 1521   | 1520.51 | 0.993196 | 0.000673 | 5.824   |
| gnl UG Ssc#S23759640 | lightgreen  | 75.793 | 7.63105 | 0.596654 | 0.288171 | 139.402 |
| gnl UG Ssc#S23759685 | blue        | 287.42 | 133.735 | 0.96223  | 0.008762 | 10.756  |
| gnl UG Ssc#S23760026 | turquoise   | 1380.4 | 1379.85 | 0.972315 | 0.005507 | 2.73    |
| gnl UG Ssc#S23760234 | turquoise   | 1514.2 | 1513.7  | 0.991709 | 0.000905 | 15.22   |
| gnl UG Ssc#S23760326 | turquoise   | 1540.8 | 1540.42 | 0.995174 | 0.000402 | 6.37    |
| gnl UG Ssc#S23760463 | turquoise   | 281.07 | 263.025 | 0.575084 | 0.310427 | 153.976 |
| gnl UG Ssc#S23760465 | yellow      | 284.99 | 45.2903 | 0.792453 | 0.109901 | 26.09   |
| gnl UG Ssc#S23761029 | turquoise   | 1570   | 1569.58 | 0.999878 | 1.63E-06 | 4.124   |
| gnl UG Ssc#S23761814 | turquoise   | 119.41 | 87.9102 | 0.328048 | 0.589933 | 16.884  |
| gnl UG Ssc#S23761842 | turquoise   | 1488.1 | 1487.69 | 0.985586 | 0.002073 | 5.674   |
| gnl UG Ssc#S23762266 | turquoise   | 1066.9 | 1064.7  | 0.911117 | 0.031382 | 35.246  |
| gnl UG Ssc#S23762445 | turquoise   | 1528.1 | 1527.68 | 0.993774 | 0.000589 | 2.546   |
| gnl UG Ssc#S23762471 | blue        | 318.37 | 146.582 | 0.982169 | 0.002851 | 18.91   |
| gnl UG Ssc#S23762560 | turquoise   | 208.79 | 149.378 | 0.387311 | 0.519483 | 41.082  |
| gnl UG Ssc#S23762736 | pink        | 230.88 | 45.3634 | 0.986935 | 0.001789 | 23.27   |
| gnl UG Ssc#S23762759 | grey        | 284.78 | 13.9716 | 0.886995 | 0.044821 | 26.69   |
| gnl UG Ssc#S23762936 | turquoise   | 1551.4 | 1550.98 | 0.996835 | 0.000214 | 19.358  |
| gnl UG Ssc#S23762974 | black       | 267.16 | 39.1482 | 0.969798 | 0.006272 | 43.358  |
| gnl UG Ssc#S23763002 | turquoise   | 1150.3 | 1149.18 | 0.933327 | 0.020458 | 2.578   |
| gnl UG Ssc#S23763174 | turquoise   | 1397.3 | 1396.84 | 0.973174 | 0.005253 | 7.034   |
| gnl UG Ssc#S23763192 | red         | 164.36 | 42.7975 | 0.952899 | 0.012184 | 4.118   |

|                      |             |        |         |          |          |         |
|----------------------|-------------|--------|---------|----------|----------|---------|
| gnl UG Ssc#S23763197 | turquoise   | 1503.3 | 1502.84 | 0.988426 | 0.001492 | 2.25    |
| gnl UG Ssc#S23763649 | black       | 245.51 | 37.4943 | 0.970263 | 0.006128 | 64.192  |
| gnl UG Ssc#S23763725 | turquoise   | 1417.7 | 1416.82 | 0.978238 | 0.003841 | 10.04   |
| gnl UG Ssc#S23763835 | turquoise   | 134.41 | 109.705 | 0.397212 | 0.507887 | 21.988  |
| gnl UG Ssc#S23763873 | turquoise   | 1517.5 | 1517.04 | 0.98963  | 0.001266 | 10.5    |
| gnl UG Ssc#S23764031 | turquoise   | 1553.6 | 1553.18 | 0.996528 | 0.000245 | 0.944   |
| gnl UG Ssc#S23764110 | blue        | 306.53 | 126.573 | 0.950483 | 0.013128 | 9.292   |
| gnl UG Ssc#S23764143 | turquoise   | 1428.9 | 1428.36 | 0.977765 | 0.003967 | 3.608   |
| gnl UG Ssc#S23764348 | turquoise   | 1532.6 | 1532.2  | 0.993566 | 0.000619 | 2.666   |
| gnl UG Ssc#S23764997 | turquoise   | 1534.9 | 1534.52 | 0.994066 | 0.000548 | 12.444  |
| gnl UG Ssc#S23765215 | turquoise   | 1458.8 | 1458.04 | 0.983778 | 0.002474 | 26.722  |
| gnl UG Ssc#S23765368 | turquoise   | 1523.2 | 1522.8  | 0.991891 | 0.000876 | 2.898   |
| gnl UG Ssc#S23765833 | turquoise   | 1553.6 | 1553.18 | 0.996528 | 0.000245 | 9.92    |
| gnl UG Ssc#S23765932 | lightcyan   | 280.04 | 26.916  | 0.995814 | 0.000325 | 74.18   |
| gnl UG Ssc#S23765987 | grey60      | 186    | 28.4214 | 0.965346 | 0.007704 | 102.008 |
| gnl UG Ssc#S23766263 | turquoise   | 1553.6 | 1553.18 | 0.996528 | 0.000245 | 0.33    |
| gnl UG Ssc#S23766271 | turquoise   | 1511.4 | 1510.96 | 0.991133 | 0.001001 | 2.416   |
| gnl UG Ssc#S23766410 | turquoise   | 1555.7 | 1555.24 | 0.997873 | 0.000118 | 3.596   |
| gnl UG Ssc#S23766475 | turquoise   | 1483.6 | 1483.2  | 0.984038 | 0.002415 | 20.086  |
| gnl UG Ssc#S23766507 | blue        | 300.14 | 137.476 | 0.967902 | 0.00687  | 37.052  |
| gnl UG Ssc#S23766544 | turquoise   | 1479.9 | 1479.52 | 0.983518 | 0.002534 | 8.756   |
| gnl UG Ssc#S23766579 | blue        | 241.2  | 110.587 | 0.918852 | 0.027409 | 44.594  |
| gnl UG Ssc#S23766637 | pink        | 226.77 | 47.8757 | 0.998756 | 5.27E-05 | 182.242 |
| gnl UG Ssc#S23766692 | turquoise   | 777.42 | 772.828 | 0.836339 | 0.077498 | 40.002  |
| gnl UG Ssc#S23767117 | yellow      | 250.96 | 61.3493 | 0.912337 | 0.030744 | 6.668   |
| gnl UG Ssc#S23767489 | turquoise   | 1507.2 | 1506.81 | 0.990873 | 0.001045 | 2.32    |
| gnl UG Ssc#S23767637 | turquoise   | 907.76 | 906.343 | 0.881482 | 0.048099 | 41.522  |
| gnl UG Ssc#S23768000 | magenta     | 254.2  | 25.6925 | 0.876729 | 0.050983 | 23.624  |
| gnl UG Ssc#S23768028 | turquoise   | 341.75 | 337.597 | 0.666755 | 0.219019 | 28.14   |
| gnl UG Ssc#S23768102 | brown       | 240.29 | 118.84  | 0.978979 | 0.003647 | 8.276   |
| gnl UG Ssc#S23768212 | blue        | 271.63 | 113.047 | 0.923614 | 0.02505  | 168.706 |
| gnl UG Ssc#S23768340 | turquoise   | 1530.1 | 1529.76 | 0.992247 | 0.000818 | 1.7     |
| gnl UG Ssc#S23768398 | turquoise   | 1481.9 | 1481.25 | 0.986736 | 0.00183  | 11.218  |
| gnl UG Ssc#S23768479 | turquoise   | 562.61 | 555.092 | 0.758249 | 0.137396 | 14.758  |
| gnl UG Ssc#S23768511 | turquoise   | 1527.6 | 1527.04 | 0.994349 | 0.000509 | 3.744   |
| gnl UG Ssc#S23768582 | blue        | 304.93 | 151.705 | 0.98991  | 0.001215 | 90.626  |
| gnl UG Ssc#S23769110 | black       | 262.71 | 40.1533 | 0.973332 | 0.005207 | 59.774  |
| gnl UG Ssc#S23769348 | turquoise   | 623.06 | 619.48  | 0.783406 | 0.116994 | 1.636   |
| gnl UG Ssc#S23769376 | turquoise   | 1093.8 | 1092.09 | 0.910507 | 0.031703 | 9.378   |
| gnl UG Ssc#S23769437 | yellow      | 213.63 | 62.4473 | 0.917258 | 0.028213 | 43.874  |
| gnl UG Ssc#S23770014 | turquoise   | 1433.4 | 1432.99 | 0.977394 | 0.004066 | 12.132  |
| gnl UG Ssc#S23770448 | lightyellow | 186.09 | 15.241  | 0.850283 | 0.067958 | 12.094  |
| gnl UG Ssc#S23770611 | turquoise   | 1521.2 | 1520.83 | 0.990606 | 0.001091 | 20.206  |
| gnl UG Ssc#S23770901 | turquoise   | 1374.6 | 1373.68 | 0.9692   | 0.006459 | 8.078   |
| gnl UG Ssc#S23770961 | yellow      | 236.71 | 83.9327 | 0.993808 | 0.000584 | 55.904  |
| gnl UG Ssc#S23771071 | magenta     | 338.74 | 42.404  | 0.983997 | 0.002424 | 6.962   |
| gnl UG Ssc#S23771394 | turquoise   | 1505.2 | 1504.63 | 0.988876 | 0.001406 | 9.4     |
| gnl UG Ssc#S23771589 | darkred     | 116.07 | 6.45804 | 0.697123 | 0.190741 | 4.62    |

|                      |              |        |         |          |          |          |
|----------------------|--------------|--------|---------|----------|----------|----------|
| gnl UG Ssc#S23771863 | brown        | 127.62 | 70.97   | 0.846523 | 0.070492 | 1.346    |
| gnl UG Ssc#S23772025 | turquoise    | 1437.2 | 1436.48 | 0.980915 | 0.003156 | 3.456    |
| gnl UG Ssc#S23772152 | turquoise    | 660.73 | 657.239 | 0.805395 | 0.099992 | 36.69    |
| gnl UG Ssc#S23772206 | turquoise    | 1554.1 | 1553.65 | 0.99798  | 0.000109 | 25.116   |
| gnl UG Ssc#S23772402 | grey60       | 232.13 | 31.265  | 0.985849 | 0.002017 | 142.368  |
| gnl UG Ssc#S23772512 | turquoise    | 1518.3 | 1517.85 | 0.991475 | 0.000944 | 4.574    |
| gnl UG Ssc#S23775145 | lightyellow  | 282.21 | 24.1293 | 0.968573 | 0.006656 | 47.506   |
| gnl UG Ssc#S23775239 | turquoise    | 1381.4 | 1380.84 | 0.966797 | 0.007226 | 7.514    |
| gnl UG Ssc#S23775247 | salmon       | 190    | 30.8751 | 0.993394 | 0.000644 | 5553.974 |
| gnl UG Ssc#S23775351 | darkgreen    | 313.21 | 22.8606 | 0.99247  | 0.000784 | 21.824   |
| gnl UG Ssc#S23775370 | turquoise    | 1341.2 | 1340.41 | 0.963137 | 0.008449 | 34.172   |
| gnl UG Ssc#S23775512 | purple       | 203.55 | 32.5772 | 0.96745  | 0.007015 | 3.366    |
| gnl UG Ssc#S23775545 | lightcyan    | 285.78 | 27.4339 | 0.997157 | 0.000182 | 10.436   |
| gnl UG Ssc#S23775557 | lightcyan    | 287.18 | 27.4116 | 0.993435 | 0.000638 | 98.962   |
| gnl UG Ssc#S23775889 | black        | 81.294 | 9.06583 | 0.493229 | 0.398485 | 12.058   |
| gnl UG Ssc#S23775891 | grey         | 64.953 | 1.08643 | -0.18188 | 0.769706 | 37.4     |
| gnl UG Ssc#S23776294 | turquoise    | 1516.6 | 1516.18 | 0.990859 | 0.001048 | 11.824   |
| gnl UG Ssc#S23776646 | turquoise    | 850.88 | 848.775 | 0.847213 | 0.070025 | 14.986   |
| gnl UG Ssc#S23776684 | turquoise    | 1366.2 | 1365.67 | 0.965015 | 0.007814 | 2.618    |
| gnl UG Ssc#S23776700 | turquoise    | 906.25 | 903.988 | 0.875187 | 0.05193  | 9.786    |
| gnl UG Ssc#S23776942 | turquoise    | 1483.7 | 1483.33 | 0.984274 | 0.002362 | 1.796    |
| gnl UG Ssc#S24609641 | midnightblue | 249.94 | 36.4315 | 0.995542 | 0.000357 | 5.794    |
| gnl UG Ssc#S24610008 | turquoise    | 1315.6 | 1314.61 | 0.958673 | 0.010023 | 19.336   |
| gnl UG Ssc#S24610239 | turquoise    | 1340.2 | 1339.56 | 0.960161 | 0.009488 | 2.07     |
| gnl UG Ssc#S24610495 | turquoise    | 1530.4 | 1529.99 | 0.992929 | 0.000713 | 16.296   |
| gnl UG Ssc#S25135543 | black        | 279.1  | 37.5007 | 0.940245 | 0.017377 | 8.69     |
| gnl UG Ssc#S25135664 | yellow       | 96.962 | 38.2788 | 0.77296  | 0.125347 | 81.882   |
| gnl UG Ssc#S25135824 | black        | 257.2  | 38.1567 | 0.978029 | 0.003896 | 26.824   |
| gnl UG Ssc#S26389653 | turquoise    | 1560.6 | 1560.18 | 0.998024 | 0.000105 | 2.386    |
| gnl UG Ssc#S26391783 | turquoise    | 1203.2 | 1202.11 | 0.932855 | 0.020674 | 6.464    |
| gnl UG Ssc#S26391884 | turquoise    | 1549   | 1548.55 | 0.997489 | 0.000151 | 2.928    |
| gnl UG Ssc#S26392586 | blue         | 266.58 | 114.366 | 0.92629  | 0.023755 | 2.774    |
| gnl UG Ssc#S26392759 | turquoise    | 1560   | 1559.58 | 0.997751 | 0.000128 | 9.43     |
| gnl UG Ssc#S26394012 | turquoise    | 1436.4 | 1435.93 | 0.981256 | 0.003072 | 4.584    |
| gnl UG Ssc#S26395675 | green        | 258.95 | 46.9326 | 0.949668 | 0.013452 | 49.14    |
| gnl UG Ssc#S26396016 | turquoise    | 1541.5 | 1541.07 | 0.995189 | 0.0004   | 1.874    |
| gnl UG Ssc#S26396713 | turquoise    | 1304   | 1302.7  | 0.957269 | 0.010535 | 55.31    |
| gnl UG Ssc#S26399010 | turquoise    | 1512   | 1511.54 | 0.988623 | 0.001454 | 15.856   |
| gnl UG Ssc#S26399811 | grey60       | 190.76 | 27.5347 | 0.959673 | 0.009662 | 66.138   |
| gnl UG Ssc#S26400047 | turquoise    | 1559.4 | 1558.96 | 0.998413 | 7.59E-05 | 6.732    |
| gnl UG Ssc#S26400566 | turquoise    | 1416   | 1415.53 | 0.973466 | 0.005168 | 4.572    |
| gnl UG Ssc#S26401286 | turquoise    | 1367.8 | 1367.26 | 0.965458 | 0.007667 | 5.056    |
| gnl UG Ssc#S26401464 | turquoise    | 329.29 | 305.546 | 0.597819 | 0.286981 | 12.884   |
| gnl UG Ssc#S26403713 | tan          | 350.53 | 35.1589 | 0.963208 | 0.008425 | 19.344   |
| gnl UG Ssc#S26403765 | turquoise    | 1556.1 | 1555.77 | 0.996859 | 0.000211 | 5.164    |
| gnl UG Ssc#S26404602 | turquoise    | 1540.9 | 1540.48 | 0.99617  | 0.000284 | 2.19     |
| gnl UG Ssc#S26408370 | turquoise    | 1491.1 | 1490.62 | 0.988181 | 0.00154  | 6.312    |
| gnl UG Ssc#S26645293 | turquoise    | 1477.3 | 1476.84 | 0.983044 | 0.002644 | 6.492    |

|                      |             |        |         |          |          |         |
|----------------------|-------------|--------|---------|----------|----------|---------|
| gnl UG Ssc#S26646909 | turquoise   | 1547.4 | 1547.03 | 0.99538  | 0.000377 | 7.254   |
| gnl UG Ssc#S26647414 | turquoise   | 1547.4 | 1547.02 | 0.996736 | 0.000224 | 3.07    |
| gnl UG Ssc#S26648597 | turquoise   | 1436.7 | 1436.21 | 0.977347 | 0.004079 | 4.73    |
| gnl UG Ssc#S26649787 | turquoise   | 1404.7 | 1404.1  | 0.973714 | 0.005096 | 5.916   |
| gnl UG Ssc#S26649927 | turquoise   | 820.88 | 817.338 | 0.852411 | 0.066536 | 27.818  |
| gnl UG Ssc#S26650236 | blue        | 257.73 | 125.992 | 0.947595 | 0.014287 | 20.82   |
| gnl UG Ssc#S26651687 | turquoise   | 1491.1 | 1490.51 | 0.988701 | 0.001439 | 6.452   |
| gnl UG Ssc#S26651783 | greenyellow | 201.68 | 22.6241 | 0.993357 | 0.000649 | 20.654  |
| gnl UG Ssc#S26652967 | yellow      | 106.82 | 39.6207 | 0.775546 | 0.123263 | 81.092  |
| gnl UG Ssc#S26710759 | darkred     | 78.442 | 13.4175 | 0.964323 | 0.008046 | 142.93  |
| gnl UG Ssc#S26711201 | turquoise   | 1439.9 | 1439.4  | 0.977856 | 0.003943 | 6.676   |
| gnl UG Ssc#S26711451 | turquoise   | 1555.7 | 1555.36 | 0.996875 | 0.00021  | 10.348  |
| gnl UG Ssc#S26711650 | red         | 131.09 | 35.1865 | 0.908564 | 0.032731 | 13.95   |
| gnl UG Ssc#S26712023 | purple      | 76.214 | 5.65291 | 0.532425 | 0.355647 | 1.612   |
| gnl UG Ssc#S26712602 | turquoise   | 1384.4 | 1383.74 | 0.969252 | 0.006442 | 6.27    |
| gnl UG Ssc#S26713657 | lightcyan   | 276.16 | 25.1731 | 0.971752 | 0.005675 | 76.518  |
| gnl UG Ssc#S26713880 | brown       | 250.37 | 120.985 | 0.978894 | 0.003669 | 0.274   |
| gnl UG Ssc#S26713936 | lightcyan   | 232.91 | 20.7423 | 0.941403 | 0.016877 | 38.906  |
| gnl UG Ssc#S26714423 | yellow      | 264.25 | 80.4693 | 0.978054 | 0.00389  | 110.182 |
| gnl UG Ssc#S26714441 | black       | 170.8  | 24.3766 | 0.853083 | 0.066089 | 150.346 |
| gnl UG Ssc#S26714791 | turquoise   | 332.46 | 311.624 | 0.603507 | 0.28119  | 57.954  |
| gnl UG Ssc#S26714922 | turquoise   | 1023.3 | 1021.21 | 0.900724 | 0.036985 | 29.472  |
| gnl UG Ssc#S26715181 | turquoise   | 1553.6 | 1553.18 | 0.996528 | 0.000245 | 1.322   |
| gnl UG Ssc#S26715223 | turquoise   | 1522.1 | 1521.66 | 0.990536 | 0.001104 | 28.558  |
| gnl UG Ssc#S26715792 | turquoise   | 1544.8 | 1544.38 | 0.995087 | 0.000413 | 18.172  |
| gnl UG Ssc#S26716026 | turquoise   | 1565.8 | 1565.36 | 0.999276 | 2.34E-05 | 66.78   |
| gnl UG Ssc#S26716503 | turquoise   | 1504.9 | 1504.44 | 0.988368 | 0.001503 | 13.682  |
| gnl UG Ssc#S26717032 | turquoise   | 1518.3 | 1517.91 | 0.991504 | 0.000939 | 36.452  |
| gnl UG Ssc#S26717691 | turquoise   | 1503.3 | 1502.67 | 0.990253 | 0.001154 | 17.356  |
| gnl UG Ssc#S26718109 | blue        | 306.5  | 143.444 | 0.977543 | 0.004026 | 20.786  |
| gnl UG Ssc#S26718597 | red         | 143.36 | 35.2945 | 0.911971 | 0.030935 | 115.48  |
| gnl UG Ssc#S26719135 | turquoise   | 1568.6 | 1568.17 | 0.999002 | 3.78E-05 | 17.196  |
| gnl UG Ssc#S26719371 | salmon      | 194.77 | 30.2682 | 0.989073 | 0.001369 | 130.224 |
| gnl UG Ssc#S26719435 | black       | 281.12 | 42.4184 | 0.985585 | 0.002073 | 168.174 |
| gnl UG Ssc#S26719940 | turquoise   | 1450.7 | 1450.25 | 0.980072 | 0.003367 | 2.71    |
| gnl UG Ssc#S26720320 | turquoise   | 1130.3 | 1128.16 | 0.922431 | 0.02563  | 10.528  |
| gnl UG Ssc#S26720420 | turquoise   | 905.25 | 903.348 | 0.868204 | 0.056287 | 74.562  |
| gnl UG Ssc#S26720426 | tan         | 292.64 | 31.2963 | 0.938335 | 0.018211 | 87.396  |
| gnl UG Ssc#S26720448 | turquoise   | 1301.6 | 1300.31 | 0.956257 | 0.01091  | 1.716   |
| gnl UG Ssc#S26720534 | turquoise   | 1530.6 | 1530.13 | 0.994395 | 0.000503 | 26.336  |
| gnl UG Ssc#S26720557 | brown       | 144.49 | 42.6439 | 0.761633 | 0.134596 | 62.746  |
| gnl UG Ssc#S26720630 | blue        | 155.16 | 68.9595 | 0.815834 | 0.092209 | 32.986  |
| gnl UG Ssc#S26720632 | turquoise   | 1165.9 | 1164.13 | 0.930809 | 0.02162  | 20.02   |
| gnl UG Ssc#S26720841 | red         | 279.26 | 41.8389 | 0.941503 | 0.016834 | 22.08   |
| gnl UG Ssc#S26720873 | turquoise   | 1433.8 | 1433.34 | 0.977533 | 0.004029 | 12.776  |
| gnl UG Ssc#S26721025 | turquoise   | 1057.2 | 1056.56 | 0.91308  | 0.030358 | 46.608  |
| gnl UG Ssc#S26721293 | turquoise   | 1546.8 | 1546.38 | 0.995835 | 0.000323 | 4.22    |
| gnl UG Ssc#S26721534 | turquoise   | 806.78 | 805.705 | 0.856615 | 0.063756 | 40.576  |

|                      |             |        |         |          |          |         |
|----------------------|-------------|--------|---------|----------|----------|---------|
| gnl UG Ssc#S26721796 | turquoise   | 1047.7 | 1045.47 | 0.904219 | 0.035068 | 4.884   |
| gnl UG Ssc#S26721858 | turquoise   | 1478.8 | 1478.33 | 0.983922 | 0.002441 | 6.936   |
| gnl UG Ssc#S26722221 | blue        | 280.66 | 136.27  | 0.965882 | 0.007526 | 15.108  |
| gnl UG Ssc#S26722332 | turquoise   | 1448.2 | 1447.73 | 0.979677 | 0.003467 | 6.4     |
| gnl UG Ssc#S26722436 | turquoise   | 1571.6 | 1571.17 | 0.999811 | 3.12E-06 | 2.016   |
| gnl UG Ssc#S26722459 | turquoise   | 1098.5 | 1096.62 | 0.921095 | 0.026289 | 29.068  |
| gnl UG Ssc#S26722558 | brown       | 164.32 | 92.1783 | 0.910356 | 0.031782 | 54.132  |
| gnl UG Ssc#S26722585 | turquoise   | 1314.6 | 1313.89 | 0.955441 | 0.011215 | 2.158   |
| gnl UG Ssc#S26722922 | salmon      | 89.413 | 21.6147 | 0.898365 | 0.038297 | 23.772  |
| gnl UG Ssc#S26723327 | salmon      | 219.02 | 24.7123 | 0.922279 | 0.025705 | 30.278  |
| gnl UG Ssc#S26723763 | yellow      | 301.08 | 65.7917 | 0.909374 | 0.032301 | 52.528  |
| gnl UG Ssc#S26723792 | blue        | 308.6  | 142.471 | 0.976433 | 0.004327 | 2.25    |
| gnl UG Ssc#S26723882 | turquoise   | 888.97 | 884.364 | 0.863083 | 0.059552 | 10.45   |
| gnl UG Ssc#S26724210 | turquoise   | 1553.6 | 1553.18 | 0.996528 | 0.000245 | 0.708   |
| gnl UG Ssc#S26724539 | turquoise   | 878.02 | 876.812 | 0.873259 | 0.053122 | 5.896   |
| gnl UG Ssc#S26724557 | turquoise   | 1239.1 | 1238.31 | 0.939716 | 0.017606 | 6.12    |
| gnl UG Ssc#S26724832 | purple      | 191.47 | 25.3731 | 0.903497 | 0.035462 | 58.118  |
| gnl UG Ssc#S26725357 | turquoise   | 1197.7 | 1197.06 | 0.936797 | 0.018892 | 3.82    |
| gnl UG Ssc#S26725722 | red         | 205.86 | 51.7625 | 0.995205 | 0.000398 | 10.256  |
| gnl UG Ssc#S26725945 | red         | 243.29 | 51.7878 | 0.994299 | 0.000516 | 5.24    |
| gnl UG Ssc#S26726115 | turquoise   | 1260.6 | 1259.33 | 0.951486 | 0.012733 | 22.592  |
| gnl UG Ssc#S26726120 | magenta     | 316.27 | 43.7088 | 0.99066  | 0.001082 | 23.66   |
| gnl UG Ssc#S26726211 | turquoise   | 618.01 | 615.788 | 0.781091 | 0.11883  | 4.042   |
| gnl UG Ssc#S26726574 | turquoise   | 1490   | 1489.39 | 0.989391 | 0.00131  | 7.502   |
| gnl UG Ssc#S26726837 | turquoise   | 1197.6 | 1196.81 | 0.940188 | 0.017401 | 15.948  |
| gnl UG Ssc#S26727063 | turquoise   | 352.09 | 343.101 | 0.643484 | 0.241402 | 9.142   |
| gnl UG Ssc#S26727199 | royalblue   | 256.63 | 22.4139 | 0.957708 | 0.010374 | 17.986  |
| gnl UG Ssc#S26727288 | turquoise   | 1544.4 | 1543.92 | 0.996734 | 0.000224 | 9.754   |
| gnl UG Ssc#S26727906 | turquoise   | 1147.4 | 1146.4  | 0.920851 | 0.026411 | 7.39    |
| gnl UG Ssc#S26728186 | turquoise   | 1495.1 | 1494.67 | 0.986069 | 0.00197  | 9.43    |
| gnl UG Ssc#S26728677 | turquoise   | 1566.3 | 1565.9  | 0.999023 | 3.67E-05 | 3.754   |
| gnl UG Ssc#S26728690 | grey60      | 266.3  | 25.2942 | 0.938474 | 0.01815  | 44.726  |
| gnl UG Ssc#S26728759 | pink        | 263.47 | 43.6995 | 0.974253 | 0.00494  | 61.292  |
| gnl UG Ssc#S26728785 | turquoise   | 1545.2 | 1544.69 | 0.996431 | 0.000256 | 4.524   |
| gnl UG Ssc#S26728925 | turquoise   | 1513.1 | 1512.61 | 0.989679 | 0.001257 | 8.666   |
| gnl UG Ssc#S26729898 | turquoise   | 1486.3 | 1485.83 | 0.985033 | 0.002193 | 8.908   |
| gnl UG Ssc#S26731491 | brown       | 129.41 | 48.1705 | 0.795018 | 0.107915 | 49.368  |
| gnl UG Ssc#S26732528 | turquoise   | 1563.8 | 1563.38 | 0.999063 | 3.44E-05 | 3.274   |
| gnl UG Ssc#S26732732 | turquoise   | 1345.2 | 1344.63 | 0.95929  | 0.0098   | 6.01    |
| gnl UG Ssc#S26732866 | turquoise   | 1300.8 | 1300.1  | 0.952308 | 0.012413 | 5.46    |
| gnl UG Ssc#S26733049 | greenyellow | 100.35 | 7.15476 | -0.21345 | 0.730306 | 226.518 |
| gnl UG Ssc#S26733269 | turquoise   | 202.83 | 195.971 | 0.545865 | 0.341235 | 95.154  |
| gnl UG Ssc#S26733295 | turquoise   | 110.47 | 84.9428 | 0.322345 | 0.596801 | 7.47    |
| gnl UG Ssc#S26733681 | turquoise   | 1510.3 | 1509.8  | 0.989738 | 0.001246 | 9.66    |
| gnl UG Ssc#S26733687 | darkred     | 110.47 | 8.88245 | 0.733526 | 0.15836  | 50.884  |
| gnl UG Ssc#S26733997 | turquoise   | 1547.9 | 1547.43 | 0.996721 | 0.000225 | 16.284  |
| gnl UG Ssc#S26734006 | blue        | 311.49 | 143.946 | 0.977925 | 0.003924 | 7.596   |
| gnl UG Ssc#S26734160 | turquoise   | 1509.1 | 1508.69 | 0.989051 | 0.001373 | 4.032   |

|                      |           |        |         |          |          |          |
|----------------------|-----------|--------|---------|----------|----------|----------|
| gnl UG Ssc#S26734197 | grey60    | 277.3  | 28.5433 | 0.964551 | 0.007969 | 13.898   |
| gnl UG Ssc#S26734209 | red       | 252.35 | 45.3417 | 0.961515 | 0.00901  | 1.052    |
| gnl UG Ssc#S26734441 | black     | 295.52 | 39.5416 | 0.962973 | 0.008505 | 66.006   |
| gnl UG Ssc#S26734833 | brown     | 226.19 | 119.093 | 0.978346 | 0.003813 | 20.596   |
| gnl UG Ssc#S26735228 | turquoise | 1479.7 | 1479.1  | 0.98623  | 0.001936 | 11.24    |
| gnl UG Ssc#S26735265 | turquoise | 339.99 | 312.361 | 0.59751  | 0.287297 | 32.958   |
| gnl UG Ssc#S26735315 | turquoise | 945.97 | 944.34  | 0.875937 | 0.051469 | 2.312    |
| gnl UG Ssc#S26735434 | darkred   | 63.287 | 6.46721 | 0.697583 | 0.190322 | 30.526   |
| gnl UG Ssc#S26735527 | turquoise | 1558.8 | 1558.46 | 0.997092 | 0.000188 | 15.098   |
| gnl UG Ssc#S27598964 | turquoise | 1438.9 | 1438.49 | 0.978608 | 0.003744 | 5.868    |
| gnl UG Ssc#S27599980 | turquoise | 1212.5 | 1211.35 | 0.934547 | 0.019903 | 82.618   |
| gnl UG Ssc#S27600018 | magenta   | 333.47 | 41.1639 | 0.975897 | 0.004476 | 125.624  |
| gnl UG Ssc#S27600466 | turquoise | 225.75 | 217.191 | 0.555604 | 0.330884 | 36.17    |
| gnl UG Ssc#S27600517 | turquoise | 925.36 | 922.612 | 0.882409 | 0.047542 | 74.128   |
| gnl UG Ssc#S27600609 | turquoise | 1558.6 | 1558.21 | 0.997672 | 0.000135 | 3.232    |
| gnl UG Ssc#S27600696 | turquoise | 1571   | 1570.59 | 0.999583 | 1.02E-05 | 1.454    |
| gnl UG Ssc#S27600966 | green     | 239.19 | 51.3701 | 0.983492 | 0.00254  | 18.336   |
| gnl UG Ssc#S27601215 | turquoise | 1197.7 | 1196.52 | 0.931314 | 0.021385 | 31.94    |
| gnl UG Ssc#S27601831 | turquoise | 1502.4 | 1501.87 | 0.989181 | 0.001349 | 8.102    |
| gnl UG Ssc#S27602031 | turquoise | 550.24 | 549.283 | 0.772205 | 0.125958 | 7.366    |
| gnl UG Ssc#S27602037 | turquoise | 161.37 | 139.041 | 0.464779 | 0.430281 | 7.414    |
| gnl UG Ssc#S27602393 | blue      | 271.51 | 130.113 | 0.955093 | 0.011347 | 18.716   |
| gnl UG Ssc#S27602398 | turquoise | 1237.8 | 1236.88 | 0.938624 | 0.018084 | 12.972   |
| gnl UG Ssc#S27602719 | turquoise | 1569.6 | 1569.24 | 0.999477 | 1.43E-05 | 8.17     |
| gnl UG Ssc#S27603973 | blue      | 326.73 | 137.206 | 0.966566 | 0.007302 | 7.908    |
| gnl UG Ssc#S29456965 | navy      | 276.76 | 31.1763 | 0.975514 | 0.004583 | 77.176   |
| gnl UG Ssc#S29459150 | brown     | 158.41 | 85.2331 | 0.903458 | 0.035483 | 157.06   |
| gnl UG Ssc#S29460541 | blue      | 307.18 | 137.02  | 0.967849 | 0.006887 | 10.594   |
| gnl UG Ssc#S29462637 | red       | 176.14 | 46.6156 | 0.972036 | 0.00559  | 5.2      |
| gnl UG Ssc#S29463694 | blue      | 286.49 | 131.776 | 0.958622 | 0.010041 | 2.074    |
| gnl UG Ssc#S29465510 | yellow    | 216.05 | 58.5517 | 0.894129 | 0.040689 | 1660.374 |
| gnl UG Ssc#S29485097 | turquoise | 1411   | 1410.33 | 0.975059 | 0.004711 | 3.934    |
| gnl UG Ssc#S29966064 | blue      | 318.5  | 155.842 | 0.996066 | 0.000296 | 28.778   |
| gnl UG Ssc#S29970127 | turquoise | 1422.5 | 1421.97 | 0.973191 | 0.005248 | 5.04     |
| gnl UG Ssc#S29971166 | turquoise | 1406.8 | 1406.31 | 0.971696 | 0.005692 | 2.064    |
| gnl UG Ssc#S29971491 | turquoise | 1562.4 | 1561.99 | 0.998975 | 3.94E-05 | 14.002   |
| gnl UG Ssc#S29971660 | turquoise | 1289.1 | 1288.04 | 0.957757 | 0.010356 | 4.056    |
| gnl UG Ssc#S29974861 | black     | 286.12 | 43.1309 | 0.99202  | 0.000855 | 75.452   |
| gnl UG Ssc#S29976380 | turquoise | 1451.3 | 1450.73 | 0.981593 | 0.002989 | 8.624    |
| gnl UG Ssc#S29977062 | turquoise | 1549.4 | 1548.96 | 0.996862 | 0.000211 | 1.738    |
| gnl UG Ssc#S29977171 | turquoise | 1378.4 | 1377.8  | 0.970046 | 0.006195 | 6.364    |
| gnl UG Ssc#S29977753 | turquoise | 1360   | 1359.42 | 0.961659 | 0.00896  | 2.692    |
| gnl UG Ssc#S29978365 | green     | 213.41 | 50.0105 | 0.960232 | 0.009463 | 41.58    |
| gnl UG Ssc#S29978506 | turquoise | 467.24 | 462.542 | 0.709568 | 0.179478 | 15.448   |
| gnl UG Ssc#S29978907 | turquoise | 120.49 | 103.416 | 0.416429 | 0.485536 | 4.124    |
| gnl UG Ssc#S29979056 | green     | 108.59 | 23.2325 | 0.774336 | 0.124237 | 0.862    |
| gnl UG Ssc#S29979252 | turquoise | 780.3  | 778.614 | 0.840801 | 0.074403 | 5.192    |
| gnl UG Ssc#S29979418 | blue      | 348.55 | 149.793 | 0.986762 | 0.001825 | 3.164    |

|                      |              |        |         |          |          |         |
|----------------------|--------------|--------|---------|----------|----------|---------|
| gnl UG Ssc#S29979787 | brown        | 261.43 | 123.45  | 0.985471 | 0.002098 | 5.1     |
| gnl UG Ssc#S29980298 | darkgreen    | 277.63 | 23.8381 | 0.996483 | 0.00025  | 5.532   |
| gnl UG Ssc#S29982058 | turquoise    | 1321.4 | 1320.62 | 0.955099 | 0.011344 | 17.878  |
| gnl UG Ssc#S29982561 | purple       | 230.29 | 34.7508 | 0.988248 | 0.001527 | 12.564  |
| gnl UG Ssc#S29983177 | turquoise    | 1557   | 1556.58 | 0.997236 | 0.000174 | 5.682   |
| gnl UG Ssc#S29983540 | turquoise    | 1045.1 | 1043.21 | 0.904088 | 0.035139 | 7.08    |
| gnl UG Ssc#S29984324 | turquoise    | 1448.7 | 1448.25 | 0.97966  | 0.003472 | 126.372 |
| gnl UG Ssc#S29987248 | turquoise    | 1553.5 | 1553.1  | 0.996054 | 0.000297 | 2.728   |
| gnl UG Ssc#S29987869 | turquoise    | 1558.5 | 1558.13 | 0.997769 | 0.000126 | 9.03    |
| gnl UG Ssc#S29988897 | grey         | 101.85 | 1.35563 | -0.42255 | 0.478459 | 7.332   |
| gnl UG Ssc#S29989732 | pink         | 243.23 | 47.6893 | 0.996454 | 0.000253 | 86.912  |
| gnl UG Ssc#S29989765 | turquoise    | 1168.1 | 1166.82 | 0.925046 | 0.024354 | 13.266  |
| gnl UG Ssc#S29989999 | royalblue    | 182.15 | 25.234  | 0.987317 | 0.001711 | 22.006  |
| gnl UG Ssc#S29990179 | green        | 261.76 | 49.1025 | 0.953117 | 0.0121   | 47.588  |
| gnl UG Ssc#S29990650 | turquoise    | 1369   | 1368.13 | 0.968892 | 0.006556 | 55.188  |
| gnl UG Ssc#S31101544 | midnightblue | 228.85 | 35.0964 | 0.98779  | 0.001617 | 112.296 |
| gnl UG Ssc#S31101691 | darkgreen    | 229.78 | 21.2356 | 0.964636 | 0.007941 | 51.938  |
| gnl UG Ssc#S31101791 | blue         | 257.22 | 123.614 | 0.942835 | 0.016266 | 2.456   |
| gnl UG Ssc#S31101896 | navy         | 292.06 | 27.079  | 0.934934 | 0.019728 | 133.604 |
| gnl UG Ssc#S31101927 | turquoise    | 855.95 | 852.547 | 0.862287 | 0.060064 | 35.5    |
| gnl UG Ssc#S31102082 | turquoise    | 1553.6 | 1553.18 | 0.996528 | 0.000245 | 1.89    |
| gnl UG Ssc#S31102306 | grey         | 57.626 | 9.24731 | 0.038775 | 0.950643 | 22.976  |
| gnl UG Ssc#S31102648 | turquoise    | 51.3   | 37.7679 | 0.232483 | 0.706681 | 4.084   |
| gnl UG Ssc#S31102731 | black        | 71.95  | 7.54356 | 0.445963 | 0.451609 | 31.718  |
| gnl UG Ssc#S31102746 | magenta      | 291.38 | 38.8082 | 0.965285 | 0.007724 | 43.52   |
| gnl UG Ssc#S31103357 | turquoise    | 1553.6 | 1553.18 | 0.996528 | 0.000245 | 4.298   |
| gnl UG Ssc#S31103552 | turquoise    | 1458.7 | 1458.24 | 0.981383 | 0.003041 | 1.034   |
| gnl UG Ssc#S31104316 | turquoise    | 1554.8 | 1554.36 | 0.99761  | 0.00014  | 4.41    |
| gnl UG Ssc#S31106641 | blue         | 330.78 | 157.86  | 0.999069 | 3.41E-05 | 30.844  |
| gnl UG Ssc#S31107148 | magenta      | 315.8  | 35.7469 | 0.947077 | 0.014499 | 12.076  |
| gnl UG Ssc#S31107257 | turquoise    | 1446.7 | 1446.2  | 0.977903 | 0.00393  | 0.708   |
| gnl UG Ssc#S31107474 | turquoise    | 1191.8 | 1190.33 | 0.938634 | 0.01808  | 12.43   |
| gnl UG Ssc#S31107757 | black        | 222.47 | 31.4042 | 0.89825  | 0.038362 | 18.09   |
| gnl UG Ssc#S31111249 | turquoise    | 1294.3 | 1293.35 | 0.958637 | 0.010035 | 4.96    |
| gnl UG Ssc#S31111456 | turquoise    | 1553.5 | 1553.12 | 0.996253 | 0.000275 | 9.676   |
| gnl UG Ssc#S31111777 | greenyellow  | 210.12 | 21.531  | 0.971632 | 0.005711 | 13.826  |
| gnl UG Ssc#S31112392 | turquoise    | 1464.5 | 1463.84 | 0.984987 | 0.002203 | 6.066   |
| gnl UG Ssc#S31113730 | turquoise    | 996.92 | 994.996 | 0.899079 | 0.037899 | 2.552   |
| gnl UG Ssc#S31113853 | purple       | 215.67 | 34.18   | 0.983975 | 0.002429 | 30.224  |
| gnl UG Ssc#S31114178 | turquoise    | 1436.4 | 1435.79 | 0.975667 | 0.00454  | 37.472  |
| gnl UG Ssc#S31114330 | black        | 292.69 | 40.3012 | 0.97903  | 0.003634 | 10.918  |
| gnl UG Ssc#S31114548 | turquoise    | 1552.8 | 1552.42 | 0.9961   | 0.000292 | 1.832   |
| gnl UG Ssc#S31114563 | turquoise    | 1456.6 | 1456.1  | 0.979581 | 0.003492 | 5.36    |
| gnl UG Ssc#S31114631 | turquoise    | 1553.6 | 1553.18 | 0.996528 | 0.000245 | 1.322   |
| gnl UG Ssc#S31114666 | tan          | 335.09 | 37.3962 | 0.977222 | 0.004113 | 32.828  |
| gnl UG Ssc#S31114805 | turquoise    | 1456.9 | 1456.16 | 0.983296 | 0.002585 | 2.6     |
| gnl UG Ssc#S31114839 | turquoise    | 1531   | 1530.53 | 0.994717 | 0.000461 | 1.808   |
| gnl UG Ssc#S31115237 | turquoise    | 1536   | 1535.47 | 0.995608 | 0.000349 | 1.312   |



|                      |               |        |         |          |          |         |
|----------------------|---------------|--------|---------|----------|----------|---------|
| gnl UG Ssc#S31115449 | turquoise     | 1411.5 | 1410.75 | 0.975625 | 0.004552 | 2.336   |
| gnl UG Ssc#S31115737 | turquoise     | 1553.6 | 1553.18 | 0.996528 | 0.000245 | 0.426   |
| gnl UG Ssc#S31115826 | turquoise     | 1554.4 | 1554    | 0.996988 | 0.000198 | 1.966   |
| gnl UG Ssc#S31115857 | turquoise     | 1563.4 | 1563    | 0.999043 | 3.56E-05 | 4.65    |
| gnl UG Ssc#S31116211 | tan           | 172.24 | 14.0125 | 0.778508 | 0.120889 | 3.74    |
| gnl UG Ssc#S31116246 | lightyellow   | 318.5  | 25.4608 | 0.992254 | 0.000817 | 7.57    |
| gnl UG Ssc#S31116354 | tan           | 284.55 | 38.6463 | 0.986684 | 0.001841 | 30.22   |
| gnl UG Ssc#S31116516 | turquoise     | 1553.6 | 1553.18 | 0.996528 | 0.000245 | 0.188   |
| gnl UG Ssc#S31118355 | turquoise     | 1508.8 | 1508.42 | 0.988013 | 0.001573 | 2.324   |
| gnl UG Ssc#S31118680 | turquoise     | 572.42 | 561.605 | 0.753536 | 0.141325 | 1.146   |
| gnl UG Ssc#S31119321 | turquoise     | 1545   | 1544.6  | 0.995362 | 0.000379 | 4.444   |
| gnl UG Ssc#S31119453 | salmon        | 115.57 | 20.2027 | 0.895253 | 0.04005  | 5.892   |
| gnl UG Ssc#S31120434 | royalblue     | 195.66 | 26.1881 | 0.995727 | 0.000335 | 5.534   |
| gnl UG Ssc#S31120438 | turquoise     | 1387.4 | 1386.53 | 0.969664 | 0.006314 | 37.018  |
| gnl UG Ssc#S31120797 | brown         | 322.16 | 93.927  | 0.906437 | 0.033869 | 17.502  |
| gnl UG Ssc#S31121510 | turquoise     | 1432.4 | 1431.87 | 0.979539 | 0.003502 | 11.278  |
| gnl UG Ssc#S31121517 | turquoise     | 346.98 | 339.207 | 0.662975 | 0.222613 | 11.182  |
| gnl UG Ssc#S31122178 | turquoise     | 1415.6 | 1414.82 | 0.975984 | 0.004451 | 1.58    |
| gnl UG Ssc#S31122252 | turquoise     | 903.02 | 900.401 | 0.876375 | 0.0512   | 25.532  |
| gnl UG Ssc#S31122306 | turquoise     | 1570   | 1569.6  | 0.999276 | 2.34E-05 | 57.288  |
| gnl UG Ssc#S31122328 | turquoise     | 1172.4 | 1171.65 | 0.937196 | 0.018715 | 14.25   |
| gnl UG Ssc#S31122485 | lightcyan     | 84.293 | 6.25235 | 0.704785 | 0.183784 | 2.714   |
| gnl UG Ssc#S31123459 | brown         | 191.45 | 93.392  | 0.915272 | 0.029227 | 16.55   |
| gnl UG Ssc#S31123896 | salmon        | 174.52 | 27.416  | 0.956771 | 0.010719 | 14.63   |
| gnl UG Ssc#S31124721 | blue          | 307.57 | 142.133 | 0.975214 | 0.004667 | 9.29    |
| gnl UG Ssc#S31124728 | turquoise     | 1570.5 | 1570.09 | 0.999367 | 1.91E-05 | 27.312  |
| gnl UG Ssc#S31124818 | turquoise     | 1465.5 | 1464.78 | 0.985746 | 0.002039 | 28.438  |
| gnl UG Ssc#S31125151 | turquoise     | 1357.4 | 1356.71 | 0.969632 | 0.006324 | 46.654  |
| gnl UG Ssc#S31128135 | turquoise     | 1555.5 | 1555.06 | 0.998049 | 0.000103 | 2.912   |
| gnl UG Ssc#S31128151 | turquoise     | 1519.5 | 1519.04 | 0.990304 | 0.001145 | 8.552   |
| gnl UG Ssc#S31128707 | turquoise     | 1244.3 | 1243.62 | 0.948741 | 0.013824 | 1.902   |
| gnl UG Ssc#S31129032 | turquoise     | 1553.6 | 1553.18 | 0.996528 | 0.000245 | 0.33    |
| gnl UG Ssc#S31129394 | pink          | 238.68 | 47.7449 | 0.997211 | 0.000177 | 247.776 |
| gnl UG Ssc#S31130453 | turquoise     | 1559.7 | 1559.23 | 0.998721 | 5.49E-05 | 4.676   |
| gnl UG Ssc#S31130713 | turquoise     | 1539.5 | 1539.09 | 0.993959 | 0.000563 | 3.392   |
| gnl UG Ssc#S31131447 | turquoise     | 1363.7 | 1362.75 | 0.966047 | 0.007472 | 29.224  |
| gnl UG Ssc#S31131596 | turquoise     | 1553.6 | 1553.18 | 0.996528 | 0.000245 | 1.558   |
| gnl UG Ssc#S31133234 | turquoise     | 1525.4 | 1524.94 | 0.993845 | 0.000579 | 6.15    |
| gnl UG Ssc#S31133660 | darkturquoise | 146.45 | 15.2146 | 0.954126 | 0.011713 | 16.398  |
| gnl UG Ssc#S31133665 | turquoise     | 1174.2 | 1172.5  | 0.935859 | 0.019311 | 15.906  |
| gnl UG Ssc#S31133718 | turquoise     | 990.91 | 990.03  | 0.900874 | 0.036902 | 0.78    |
| gnl UG Ssc#S31133723 | red           | 257.44 | 49.5023 | 0.982845 | 0.00269  | 55.22   |
| gnl UG Ssc#S31133725 | brown         | 202.93 | 94.2784 | 0.919775 | 0.026946 | 14.712  |
| gnl UG Ssc#S31133918 | lightcyan     | 286.57 | 27.0755 | 0.998759 | 5.25E-05 | 21.308  |
| gnl UG Ssc#S31133980 | yellow        | 84.403 | 23.3217 | 0.627631 | 0.256986 | 12.722  |
| gnl UG Ssc#S31134054 | blue          | 332.95 | 150.934 | 0.988803 | 0.00142  | 9.516   |
| gnl UG Ssc#S31134161 | blue          | 340.27 | 143.978 | 0.977623 | 0.004005 | 7.656   |
| gnl UG Ssc#S31134214 | turquoise     | 1486.6 | 1486.17 | 0.985844 | 0.002018 | 3.318   |

|                      |             |        |         |          |          |         |
|----------------------|-------------|--------|---------|----------|----------|---------|
| gnl UG Ssc#S31134253 | turquoise   | 1056.7 | 1054.51 | 0.909251 | 0.032366 | 26.372  |
| gnl UG Ssc#S31986007 | brown       | 179.45 | 94.6511 | 0.930632 | 0.021702 | 7.724   |
| gnl UG Ssc#S31986306 | turquoise   | 1359.9 | 1359.19 | 0.970049 | 0.006194 | 5.136   |
| gnl UG Ssc#S31986337 | lightyellow | 183.26 | 14.1236 | 0.833534 | 0.079464 | 25.436  |
| gnl UG Ssc#S32419644 | red         | 184.13 | 40.4421 | 0.941663 | 0.016766 | 34.582  |
| gnl UG Ssc#S32771805 | brown       | 316.34 | 94.8938 | 0.904016 | 0.035178 | 13.616  |
| gnl UG Ssc#S32800732 | blue        | 352.52 | 128.945 | 0.952505 | 0.012336 | 83.21   |
| gnl UG Ssc#S34495577 | turquoise   | 1385.9 | 1385.32 | 0.968116 | 0.006802 | 8.156   |
| gnl UG Ssc#S34497945 | turquoise   | 1542.9 | 1542.49 | 0.995279 | 0.000389 | 7.266   |
| gnl UG Ssc#S34500484 | turquoise   | 1464.8 | 1464.37 | 0.981225 | 0.00308  | 9.552   |
| gnl UG Ssc#S34500573 | blue        | 216.44 | 95.5279 | 0.885708 | 0.04558  | 57.308  |
| gnl UG Ssc#S34500909 | turquoise   | 1336.8 | 1335.69 | 0.963285 | 0.008398 | 10.196  |
| gnl UG Ssc#S34502088 | yellow      | 166.61 | 68.804  | 0.945106 | 0.015311 | 28.832  |
| gnl UG Ssc#S34504168 | brown       | 275.35 | 120.825 | 0.979033 | 0.003633 | 103.036 |
| gnl UG Ssc#S34508066 | magenta     | 306.4  | 41.9202 | 0.98073  | 0.003202 | 18.604  |
| gnl UG Ssc#S34509910 | grey        | 271.74 | 13.5993 | 0.871834 | 0.054008 | 44.19   |
| gnl UG Ssc#S34510284 | turquoise   | 1547.6 | 1547.2  | 0.995279 | 0.000389 | 1.938   |
| gnl UG Ssc#S34510310 | turquoise   | 1553.6 | 1553.18 | 0.996528 | 0.000245 | 0.566   |
| gnl UG Ssc#S34511356 | turquoise   | 842.32 | 838.662 | 0.857506 | 0.063172 | 15.026  |
| gnl UG Ssc#S34511666 | turquoise   | 230.89 | 221.395 | 0.549832 | 0.337008 | 11.054  |
| gnl UG Ssc#S34512754 | turquoise   | 1303.9 | 1302.75 | 0.959076 | 0.009877 | 12.652  |
| gnl UG Ssc#S34512833 | turquoise   | 910.8  | 908.971 | 0.863372 | 0.059366 | 18.834  |
| gnl UG Ssc#S34513996 | pink        | 213.76 | 40.8577 | 0.965042 | 0.007805 | 31.14   |
| gnl UG Ssc#S34514135 | turquoise   | 1495.1 | 1494.65 | 0.988    | 0.001575 | 4.114   |
| gnl UG Ssc#S34514406 | turquoise   | 1535.6 | 1535.2  | 0.992855 | 0.000724 | 7.696   |
| gnl UG Ssc#S34516266 | turquoise   | 1487.7 | 1487.05 | 0.988404 | 0.001496 | 34.92   |
| gnl UG Ssc#S34516415 | blue        | 312.65 | 140.935 | 0.973474 | 0.005165 | 11.496  |
| gnl UG Ssc#S34516476 | turquoise   | 1568.5 | 1568.14 | 0.999071 | 3.40E-05 | 3.056   |
| gnl UG Ssc#S34516523 | turquoise   | 1538.9 | 1538.37 | 0.995914 | 0.000313 | 6.384   |
| gnl UG Ssc#S34517367 | turquoise   | 1213.9 | 1212.66 | 0.936035 | 0.019233 | 94.232  |
| gnl UG Ssc#S34517545 | turquoise   | 1178.4 | 1177.44 | 0.925699 | 0.02404  | 13.034  |
| gnl UG Ssc#S34518006 | turquoise   | 1405   | 1404.29 | 0.976544 | 0.004297 | 21.632  |
| gnl UG Ssc#S34518323 | turquoise   | 1559.5 | 1559.12 | 0.997244 | 0.000174 | 6.778   |
| gnl UG Ssc#S34518426 | turquoise   | 1310.3 | 1309.2  | 0.95791  | 0.0103   | 10.026  |
| gnl UG Ssc#S34521528 | turquoise   | 1465.9 | 1465.47 | 0.982671 | 0.002731 | 3.39    |
| gnl UG Ssc#S34521601 | turquoise   | 980.66 | 978.496 | 0.889733 | 0.04322  | 40.752  |
| gnl UG Ssc#S34521876 | lightyellow | 211.63 | 14.5219 | 0.854021 | 0.065467 | 21.576  |
| gnl UG Ssc#S34521911 | turquoise   | 1489   | 1488.63 | 0.986402 | 0.0019   | 4.548   |
| gnl UG Ssc#S34524196 | turquoise   | 1552.7 | 1552.28 | 0.996367 | 0.000263 | 3.866   |
| gnl UG Ssc#S34524449 | turquoise   | 1479.6 | 1479.1  | 0.985208 | 0.002155 | 4.932   |
| gnl UG Ssc#S34527038 | turquoise   | 1389.6 | 1389.13 | 0.969532 | 0.006355 | 6.288   |
| gnl UG Ssc#S34527542 | turquoise   | 1215.4 | 1214.71 | 0.934673 | 0.019846 | 1.54    |
| gnl UG Ssc#S34527927 | turquoise   | 1409.9 | 1409.02 | 0.976933 | 0.004191 | 17.912  |
| gnl UG Ssc#S34528527 | turquoise   | 810.5  | 809.175 | 0.842916 | 0.07295  | 39.054  |
| gnl UG Ssc#S34529144 | turquoise   | 1438.2 | 1437.74 | 0.976808 | 0.004225 | 3.294   |
| gnl UG Ssc#S34529284 | greenyellow | 196.96 | 22.8175 | 0.975676 | 0.004537 | 33.684  |
| gnl UG Ssc#S34529317 | turquoise   | 326.41 | 298.796 | 0.584053 | 0.30112  | 7.886   |
| gnl UG Ssc#S34529539 | turquoise   | 1321.1 | 1320.11 | 0.962343 | 0.008722 | 4.39    |

|                      |              |        |         |          |          |         |
|----------------------|--------------|--------|---------|----------|----------|---------|
| gnl UG Ssc#S34529604 | turquoise    | 1365   | 1364.18 | 0.963923 | 0.008181 | 5.398   |
| gnl UG Ssc#S34529627 | turquoise    | 1503.3 | 1502.82 | 0.988655 | 0.001448 | 3.138   |
| gnl UG Ssc#S34529832 | turquoise    | 1329.9 | 1328.86 | 0.958951 | 0.009922 | 3.416   |
| gnl UG Ssc#S34530291 | turquoise    | 1339.1 | 1338.32 | 0.961657 | 0.008961 | 17.53   |
| gnl UG Ssc#S34530397 | turquoise    | 1545.8 | 1545.39 | 0.994674 | 0.000466 | 5.986   |
| gnl UG Ssc#S34530843 | turquoise    | 1517.8 | 1517.39 | 0.989593 | 0.001273 | 15.212  |
| gnl UG Ssc#S34530890 | midnightblue | 249.31 | 36.5312 | 0.996135 | 0.000288 | 14.2    |
| gnl UG Ssc#S34531282 | turquoise    | 1440.9 | 1440.34 | 0.980081 | 0.003364 | 32.764  |
| gnl UG Ssc#S34531381 | turquoise    | 232.19 | 180.633 | 0.438152 | 0.46053  | 36.654  |
| gnl UG Ssc#S34531531 | yellow       | 84.374 | 30.7642 | 0.732692 | 0.159082 | 26.644  |
| gnl UG Ssc#S34532625 | turquoise    | 1439.7 | 1439.23 | 0.975791 | 0.004505 | 8.456   |
| gnl UG Ssc#S34532931 | turquoise    | 1529.9 | 1529.49 | 0.99335  | 0.00065  | 3.658   |
| gnl UG Ssc#S34533088 | turquoise    | 1112.6 | 1110.89 | 0.91965  | 0.027009 | 6.128   |
| gnl UG Ssc#S34533546 | turquoise    | 1514.1 | 1513.75 | 0.989736 | 0.001246 | 14.924  |
| gnl UG Ssc#S34533729 | turquoise    | 1569.8 | 1569.41 | 0.999252 | 2.46E-05 | 4.368   |
| gnl UG Ssc#S35164631 | turquoise    | 1542.8 | 1542.43 | 0.994211 | 0.000528 | 1.79    |
| gnl UG Ssc#S35166313 | brown        | 283.16 | 105.16  | 0.936839 | 0.018873 | 5.838   |
| gnl UG Ssc#S35166842 | turquoise    | 1570.7 | 1570.26 | 0.999655 | 7.68E-06 | 3.76    |
| gnl UG Ssc#S35167355 | blue         | 339.05 | 150.683 | 0.988386 | 0.0015   | 13.328  |
| gnl UG Ssc#S35167435 | royalblue    | 150.12 | 21.6787 | 0.952103 | 0.012493 | 2.418   |
| gnl UG Ssc#S35167446 | yellow       | 144.09 | 56.6195 | 0.898791 | 0.038059 | 19.236  |
| gnl UG Ssc#S35169280 | blue         | 317.11 | 150.05  | 0.987786 | 0.001617 | 19.674  |
| gnl UG Ssc#S35169669 | turquoise    | 429.67 | 424.21  | 0.715653 | 0.174042 | 2.912   |
| gnl UG Ssc#S35171904 | lightcyan    | 298.09 | 26.1322 | 0.978214 | 0.003847 | 291.396 |
| gnl UG Ssc#S35171934 | turquoise    | 1528.4 | 1527.95 | 0.992945 | 0.000711 | 20.23   |
| gnl UG Ssc#S35173188 | turquoise    | 1032.6 | 1031.6  | 0.897301 | 0.038893 | 466.114 |
| gnl UG Ssc#S35173683 | green        | 258.27 | 50.8166 | 0.964122 | 0.008114 | 17.85   |
| gnl UG Ssc#S35322082 | turquoise    | 119.74 | 85.6901 | 0.318672 | 0.60123  | 1.334   |
| gnl UG Ssc#S35322342 | turquoise    | 65.715 | 54.5413 | 0.33325  | 0.583682 | 2.756   |
| gnl UG Ssc#S35322980 | turquoise    | 557.2  | 553.623 | 0.757947 | 0.137647 | 2.992   |
| gnl UG Ssc#S35323260 | turquoise    | 1507.2 | 1506.66 | 0.990515 | 0.001107 | 7.498   |
| gnl UG Ssc#S35323577 | brown        | 297.27 | 110.548 | 0.953906 | 0.011797 | 4.782   |
| gnl UG Ssc#S35323677 | turquoise    | 353.3  | 344.894 | 0.637176 | 0.247572 | 13.366  |
| gnl UG Ssc#S35323988 | turquoise    | 1475.7 | 1475.28 | 0.982373 | 0.002802 | 14.786  |
| gnl UG Ssc#S35324071 | turquoise    | 1502.5 | 1502.08 | 0.988102 | 0.001555 | 1.828   |
| gnl UG Ssc#S35324845 | turquoise    | 1410.2 | 1409.66 | 0.975209 | 0.004668 | 3.772   |
| gnl UG Ssc#S35325128 | darkgreen    | 225.79 | 21.9478 | 0.970413 | 0.006082 | 4.584   |
| gnl UG Ssc#S35325248 | turquoise    | 1164.3 | 1163.46 | 0.929694 | 0.02214  | 19.02   |
| gnl UG Ssc#S35325457 | turquoise    | 1492.7 | 1492.22 | 0.987473 | 0.00168  | 3.618   |
| gnl UG Ssc#S35325791 | tan          | 322.58 | 38.4158 | 0.98284  | 0.002692 | 17.484  |
| gnl UG Ssc#S35325947 | brown        | 252.99 | 125.449 | 0.989683 | 0.001256 | 9.312   |
| gnl UG Ssc#S35326006 | turquoise    | 203.15 | 189.83  | 0.513931 | 0.375714 | 18.414  |
| gnl UG Ssc#S35326767 | yellow       | 179.07 | 68.5961 | 0.937865 | 0.018418 | 17.626  |
| gnl UG Ssc#S35327002 | turquoise    | 1536.3 | 1535.85 | 0.993277 | 0.000661 | 5.436   |
| gnl UG Ssc#S35327311 | turquoise    | 1068.5 | 1067.18 | 0.902542 | 0.035984 | 10.282  |
| gnl UG Ssc#S35328709 | brown        | 83.056 | 34.9023 | 0.72343  | 0.167167 | 9.406   |
| gnl UG Ssc#S35329254 | turquoise    | 956.7  | 955.409 | 0.877386 | 0.050582 | 18.498  |
| gnl UG Ssc#S35329402 | green        | 229.34 | 53.4715 | 0.9842   | 0.002378 | 122.382 |

|                      |              |        |         |          |          |         |
|----------------------|--------------|--------|---------|----------|----------|---------|
| gnl UG Ssc#S35329994 | turquoise    | 1544.3 | 1543.86 | 0.994949 | 0.000431 | 4.678   |
| gnl UG Ssc#S35331200 | pink         | 234.04 | 40.7143 | 0.959759 | 0.009632 | 13.93   |
| gnl UG Ssc#S35331378 | turquoise    | 1562.6 | 1562.2  | 0.998444 | 7.37E-05 | 3.51    |
| gnl UG Ssc#S35331631 | turquoise    | 1242.9 | 1241.98 | 0.948373 | 0.013972 | 2.364   |
| gnl UG Ssc#S35332920 | turquoise    | 1201.7 | 1200.97 | 0.943117 | 0.016146 | 11.038  |
| gnl UG Ssc#S35332961 | turquoise    | 785.4  | 781.168 | 0.83838  | 0.076078 | 21.226  |
| gnl UG Ssc#S35333016 | red          | 202.52 | 48.4116 | 0.980266 | 0.003318 | 11.87   |
| gnl UG Ssc#S35334259 | pink         | 173.79 | 42.0217 | 0.96997  | 0.006219 | 22.234  |
| gnl UG Ssc#S35336579 | green        | 97.333 | 23.9941 | 0.805805 | 0.099682 | 8.538   |
| gnl UG Ssc#S35336616 | turquoise    | 1476.3 | 1475.75 | 0.985183 | 0.00216  | 6.432   |
| gnl UG Ssc#S35723183 | turquoise    | 1541.2 | 1540.82 | 0.994891 | 0.000438 | 28.954  |
| gnl UG Ssc#S35723730 | turquoise    | 1445.9 | 1445.19 | 0.979437 | 0.003529 | 37.032  |
| gnl UG Ssc#S38479783 | turquoise    | 1545.5 | 1545.03 | 0.997042 | 0.000193 | 50.432  |
| gnl UG Ssc#S38479786 | green        | 193.48 | 47.0806 | 0.959099 | 0.009868 | 128.982 |
| gnl UG Ssc#S38480083 | greenyellow  | 68.515 | 0.81236 | 0.089514 | 0.886179 | 42.256  |
| gnl UG Ssc#S38480459 | turquoise    | 1570.6 | 1570.22 | 0.999495 | 1.36E-05 | 1.548   |
| gnl UG Ssc#S38481028 | turquoise    | 1542.2 | 1541.75 | 0.995703 | 0.000338 | 19.83   |
| gnl UG Ssc#S38481167 | turquoise    | 1220.7 | 1219.23 | 0.944061 | 0.015748 | 3.242   |
| gnl UG Ssc#S38481210 | turquoise    | 1280.6 | 1279.89 | 0.948404 | 0.01396  | 2.254   |
| gnl UG Ssc#S38481364 | lightcyan    | 284.3  | 27.2531 | 0.997793 | 0.000124 | 30.318  |
| gnl UG Ssc#S38481793 | blue         | 249.65 | 104.082 | 0.904549 | 0.034889 | 7.082   |
| gnl UG Ssc#S38481847 | blue         | 269.99 | 130.778 | 0.956422 | 0.010849 | 22.482  |
| gnl UG Ssc#S38481918 | turquoise    | 1110.8 | 1109.83 | 0.920907 | 0.026383 | 23.518  |
| gnl UG Ssc#S38482262 | turquoise    | 1435.3 | 1434.8  | 0.975481 | 0.004592 | 23.64   |
| gnl UG Ssc#S38482319 | brown        | 293.57 | 109.303 | 0.945015 | 0.015349 | 86.904  |
| gnl UG Ssc#S38482329 | blue         | 207.29 | 86.1347 | 0.862981 | 0.059617 | 50.806  |
| gnl UG Ssc#S38482352 | turquoise    | 1448.6 | 1447.85 | 0.982674 | 0.002731 | 8.694   |
| gnl UG Ssc#S38482401 | turquoise    | 1506.7 | 1506.24 | 0.989631 | 0.001265 | 1.352   |
| gnl UG Ssc#S38483118 | turquoise    | 1532.5 | 1532.11 | 0.99356  | 0.00062  | 4.272   |
| gnl UG Ssc#S39762052 | brown        | 246.35 | 129.7   | 0.999157 | 2.94E-05 | 13.762  |
| gnl UG Ssc#S39768843 | brown        | 238.58 | 86.2226 | 0.895771 | 0.039756 | 6.718   |
| gnl UG Ssc#S39772429 | lightcyan    | 234.37 | 17.7338 | 0.887659 | 0.044431 | 55.712  |
| gnl UG Ssc#S39773791 | midnightblue | 232.44 | 36.2271 | 0.994396 | 0.000503 | 87.732  |
| gnl UG Ssc#S39776069 | tan          | 278.72 | 34.8531 | 0.963149 | 0.008445 | 112.226 |
| gnl UG Ssc#S39777926 | yellow       | 222.98 | 64.2478 | 0.925951 | 0.023918 | 303.14  |
| gnl UG Ssc#S39778104 | yellow       | 311.18 | 57.2478 | 0.87106  | 0.054492 | 26.268  |
| gnl UG Ssc#S39778806 | darkred      | 110.28 | 11.3693 | 0.852955 | 0.066175 | 84.868  |
| gnl UG Ssc#S39779823 | turquoise    | 1496.3 | 1495.85 | 0.986237 | 0.001934 | 3.584   |
| gnl UG Ssc#S39780074 | turquoise    | 1517.2 | 1516.81 | 0.990624 | 0.001088 | 5.292   |
| gnl UG Ssc#S39789448 | turquoise    | 1557.4 | 1557    | 0.997823 | 0.000122 | 20.162  |
| gnl UG Ssc#S39793738 | turquoise    | 1524.8 | 1524.3  | 0.992868 | 0.000722 | 3.19    |
| gnl UG Ssc#S39794612 | darkgreen    | 302.04 | 6.995   | 0.714032 | 0.175486 | 21.388  |
| gnl UG Ssc#S39794773 | grey60       | 186.53 | 26.4019 | 0.94741  | 0.014362 | 279.002 |
| gnl UG Ssc#S39797758 | yellow       | 148.04 | 64.2378 | 0.929319 | 0.022316 | 14.092  |
| gnl UG Ssc#S39798692 | turquoise    | 1121.4 | 1120.36 | 0.916304 | 0.028699 | 9.78    |
| gnl UG Ssc#S39803256 | yellow       | 73.97  | 23.3712 | 0.652372 | 0.232783 | 9.408   |
| gnl UG Ssc#S39804944 | turquoise    | 1562.5 | 1562.03 | 0.999176 | 2.84E-05 | 3.082   |
| gnl UG Ssc#S39808414 | greenyellow  | 234.16 | 20.587  | 0.949075 | 0.013689 | 5.63    |

|                      |              |        |         |          |          |         |
|----------------------|--------------|--------|---------|----------|----------|---------|
| gnl UG Ssc#S39812694 | turquoise    | 1189   | 1187.9  | 0.928829 | 0.022547 | 5.452   |
| gnl UG Ssc#S39814752 | turquoise    | 1422.6 | 1421.84 | 0.979046 | 0.00363  | 28.952  |
| gnl UG Ssc#S39833392 | magenta      | 341.19 | 44.4348 | 0.992771 | 0.000737 | 44.35   |
| gnl UG Ssc#S39838237 | yellow       | 203.93 | 79.9793 | 0.983337 | 0.002576 | 7.974   |
| gnl UG Ssc#S39839709 | pink         | 266.91 | 43.6798 | 0.97394  | 0.00503  | 43.444  |
| gnl UG Ssc#S39839769 | grey60       | 171.14 | 25.8981 | 0.944844 | 0.015421 | 86.49   |
| gnl UG Ssc#S39839770 | brown        | 292.81 | 101.841 | 0.935007 | 0.019695 | 17.954  |
| gnl UG Ssc#S39839881 | turquoise    | 1317.9 | 1317.07 | 0.956389 | 0.010861 | 3.058   |
| gnl UG Ssc#S39841622 | black        | 256.27 | 39.5445 | 0.964539 | 0.007973 | 32.394  |
| gnl UG Ssc#S39842447 | purple       | 138.21 | 22.3895 | 0.869037 | 0.055762 | 422.45  |
| gnl UG Ssc#S39842527 | greenyellow  | 182.51 | 22.5092 | 0.975981 | 0.004453 | 3.332   |
| gnl UG Ssc#S39851973 | tan          | 326.86 | 38.6443 | 0.983935 | 0.002438 | 29.692  |
| gnl UG Ssc#S39853219 | turquoise    | 1542.8 | 1542.42 | 0.99431  | 0.000515 | 4.846   |
| gnl UG Ssc#S39855926 | turquoise    | 1496.4 | 1495.95 | 0.986085 | 0.001966 | 2.03    |
| gnl UG Ssc#S39858087 | green        | 232.54 | 53.8573 | 0.987584 | 0.001658 | 50.428  |
| gnl UG Ssc#S39861498 | tan          | 332.48 | 40.5668 | 0.995528 | 0.000359 | 176.924 |
| gnl UG Ssc#S39872348 | turquoise    | 1293.9 | 1293.15 | 0.949526 | 0.013509 | 7.508   |
| gnl UG Ssc#S39879611 | turquoise    | 306.33 | 301.154 | 0.628701 | 0.255925 | 3.464   |
| gnl UG Ssc#S39885581 | yellow       | 197    | 68.342  | 0.936111 | 0.019198 | 22.862  |
| gnl UG Ssc#S39888860 | midnightblue | 186.88 | 31.0119 | 0.962855 | 0.008546 | 35.706  |
| gnl UG Ssc#S39889520 | blue         | 343.73 | 150.463 | 0.988213 | 0.001533 | 170.682 |
| gnl UG Ssc#S39891679 | turquoise    | 928.22 | 925.238 | 0.880274 | 0.048827 | 196.964 |
| gnl UG Ssc#S39900214 | lightcyan    | 272.95 | 25.8636 | 0.987597 | 0.001655 | 18.09   |
| gnl UG Ssc#S39912933 | greenyellow  | 79.621 | 7.4164  | -0.44164 | 0.456539 | 52.298  |
| gnl UG Ssc#S39928606 | brown        | 265.31 | 114.068 | 0.960848 | 0.009245 | 2.774   |
| gnl UG Ssc#S39932918 | turquoise    | 1214.6 | 1213.71 | 0.933384 | 0.020432 | 4.312   |
| gnl UG Ssc#S39935005 | turquoise    | 1568.9 | 1568.49 | 0.999487 | 1.40E-05 | 7.912   |
| gnl UG Ssc#S39943227 | turquoise    | 1480.6 | 1480.09 | 0.983743 | 0.002482 | 5.952   |
| gnl UG Ssc#S39951768 | turquoise    | 1110.2 | 1109.1  | 0.911668 | 0.031093 | 11.334  |
| gnl UG Ssc#S39955157 | turquoise    | 1559.4 | 1559.03 | 0.997365 | 0.000162 | 10.63   |
| gnl UG Ssc#S39957439 | turquoise    | 1481.3 | 1480.81 | 0.984573 | 0.002295 | 11.01   |
| gnl UG Ssc#S39959286 | turquoise    | 1508.5 | 1508.09 | 0.990138 | 0.001174 | 3.964   |
| gnl UG Ssc#S39959416 | turquoise    | 1426.6 | 1426.09 | 0.976349 | 0.004351 | 13.136  |
| gnl UG Ssc#S39959676 | turquoise    | 1536.1 | 1535.67 | 0.994826 | 0.000446 | 2.666   |
| gnl UG Ssc#S39960115 | brown        | 314.37 | 84.8365 | 0.873736 | 0.052826 | 17.608  |
| gnl UG Ssc#S39964958 | lightgreen   | 44.909 | 14.9562 | 0.910214 | 0.031857 | 6.552   |
| gnl UG Ssc#S39967395 | turquoise    | 1428.4 | 1427.56 | 0.979078 | 0.003621 | 9.972   |
| gnl UG Ssc#S39967671 | purple       | 177.65 | 31.8757 | 0.960938 | 0.009213 | 18.218  |
| gnl UG Ssc#S39979082 | turquoise    | 272.65 | 265.066 | 0.597543 | 0.287263 | 106.744 |
| gnl UG Ssc#S39979775 | blue         | 322.54 | 156.754 | 0.997498 | 0.00015  | 9.574   |
| gnl UG Ssc#S39979866 | darkred      | 90.698 | 12.8989 | 0.922066 | 0.025809 | 51.01   |
| gnl UG Ssc#S39980022 | pink         | 146.71 | 36.4575 | 0.936717 | 0.018928 | 18.472  |
| gnl UG Ssc#S39980075 | turquoise    | 1517   | 1516.58 | 0.989946 | 0.001208 | 3.666   |
| gnl UG Ssc#S39980686 | turquoise    | 1553.6 | 1553.18 | 0.996528 | 0.000245 | 0.142   |
| gnl UG Ssc#S39982552 | green        | 247    | 50.9936 | 0.974764 | 0.004794 | 151.878 |
| gnl UG Ssc#S39982735 | turquoise    | 1530.2 | 1529.76 | 0.992815 | 0.00073  | 3.184   |
| gnl UG Ssc#S39983835 | turquoise    | 1223.8 | 1222.57 | 0.946113 | 0.014894 | 3.614   |
| gnl UG Ssc#S39984038 | turquoise    | 182.84 | 134.823 | 0.372569 | 0.536845 | 108.874 |

|                      |           |        |         |          |          |          |
|----------------------|-----------|--------|---------|----------|----------|----------|
| gnl UG Ssc#S39984272 | grey60    | 228.69 | 29.1753 | 0.969952 | 0.006224 | 27.068   |
| gnl UG Ssc#S39984816 | turquoise | 1553.6 | 1553.18 | 0.996528 | 0.000245 | 0.378    |
| gnl UG Ssc#S39985253 | turquoise | 654.01 | 648.001 | 0.79748  | 0.106018 | 3.788    |
| gnl UG Ssc#S39985763 | turquoise | 1553.6 | 1553.18 | 0.996528 | 0.000245 | 0.898    |
| gnl UG Ssc#S39987785 | turquoise | 1233.5 | 1231.94 | 0.94336  | 0.016043 | 2.084    |
| gnl UG Ssc#S39988753 | brown     | 206.13 | 91.8904 | 0.91358  | 0.030099 | 2.984    |
| gnl UG Ssc#S39989284 | tan       | 335.48 | 37.9845 | 0.980334 | 0.003301 | 14.036   |
| gnl UG Ssc#S39990281 | blue      | 339.64 | 154.535 | 0.994371 | 0.000507 | 10.904   |
| gnl UG Ssc#S39990452 | turquoise | 1571   | 1570.59 | 0.999583 | 1.02E-05 | 1.454    |
| gnl UG Ssc#S39991071 | turquoise | 550.69 | 543.158 | 0.753817 | 0.14109  | 5.778    |
| gnl UG Ssc#S39991153 | turquoise | 1520.5 | 1520.04 | 0.992938 | 0.000712 | 4.262    |
| gnl UG Ssc#S39992206 | turquoise | 1553.6 | 1553.18 | 0.996528 | 0.000245 | 3.07     |
| gnl UG Ssc#S39992562 | blue      | 315.86 | 153.288 | 0.992443 | 0.000788 | 7.464    |
| gnl UG Ssc#S39993494 | red       | 266.65 | 47.168  | 0.970283 | 0.006122 | 94.282   |
| gnl UG Ssc#S39993541 | turquoise | 1553.6 | 1553.18 | 0.996528 | 0.000245 | 2.268    |
| gnl UG Ssc#S39994120 | tan       | 305.67 | 35.43   | 0.964808 | 0.007883 | 39.494   |
| gnl UG Ssc#S39994161 | turquoise | 1458   | 1457.37 | 0.984247 | 0.002368 | 12.308   |
| gnl UG Ssc#S39994288 | turquoise | 1553.6 | 1553.18 | 0.996528 | 0.000245 | 0.188    |
| gnl UG Ssc#S39994657 | yellow    | 246.29 | 57.0963 | 0.863555 | 0.059248 | 20.196   |
| gnl UG Ssc#S39995011 | turquoise | 1355.6 | 1355.06 | 0.96186  | 0.00889  | 0.52     |
| gnl UG Ssc#S39995335 | turquoise | 724.11 | 720.639 | 0.827605 | 0.083668 | 21.07    |
| gnl UG Ssc#S39995545 | turquoise | 1553.6 | 1553.18 | 0.996528 | 0.000245 | 2.786    |
| gnl UG Ssc#S39996844 | turquoise | 231.36 | 217.89  | 0.558337 | 0.327994 | 60.62    |
| gnl UG Ssc#S39997671 | purple    | 165.56 | 28.4    | 0.930065 | 0.021967 | 0.488    |
| gnl UG Ssc#S39998520 | turquoise | 1553.6 | 1553.18 | 0.996528 | 0.000245 | 0.426    |
| gnl UG Ssc#S39998964 | brown     | 257.62 | 124.687 | 0.989018 | 0.001379 | 6.754    |
| gnl UG Ssc#S39998988 | grey60    | 269.16 | 29.9238 | 0.976526 | 0.004302 | 1470.916 |
| gnl UG Ssc#S39999498 | turquoise | 1553.6 | 1553.18 | 0.996528 | 0.000245 | 0.566    |
| gnl UG Ssc#S40000845 | turquoise | 1531.6 | 1531.18 | 0.99444  | 0.000497 | 1.794    |
| gnl UG Ssc#S40003052 | turquoise | 1531.1 | 1530.68 | 0.993926 | 0.000568 | 92.334   |
| gnl UG Ssc#S40003133 | turquoise | 1568.5 | 1568.12 | 0.999606 | 9.38E-06 | 2.758    |
| gnl UG Ssc#S40004648 | turquoise | 136.15 | 111.449 | 0.401831 | 0.502496 | 78.814   |
| gnl UG Ssc#S40004911 | turquoise | 1310.2 | 1309.63 | 0.955537 | 0.011179 | 1.16     |
| gnl UG Ssc#S40006504 | turquoise | 1528.8 | 1528.46 | 0.992792 | 0.000734 | 3.422    |
| gnl UG Ssc#S40007606 | turquoise | 1233.3 | 1231.86 | 0.942807 | 0.016277 | 11.742   |
| gnl UG Ssc#S40007947 | turquoise | 1515.4 | 1515.01 | 0.989459 | 0.001297 | 22.536   |
| gnl UG Ssc#S40008864 | royalblue | 194.99 | 24.4169 | 0.980837 | 0.003175 | 15.308   |
| gnl UG Ssc#S40012596 | turquoise | 389.07 | 367.388 | 0.6433   | 0.241582 | 4.536    |
| gnl UG Ssc#S40012957 | turquoise | 1553.6 | 1553.18 | 0.996528 | 0.000245 | 1.512    |
| gnl UG Ssc#S40014860 | turquoise | 1393.4 | 1392.64 | 0.972465 | 0.005462 | 9.792    |
| gnl UG Ssc#S40017556 | royalblue | 165.24 | 23.8283 | 0.973987 | 0.005017 | 4.07     |
| gnl UG Ssc#S40020159 | navy      | 270.13 | 30.1337 | 0.965076 | 0.007794 | 251.016  |
| gnl UG Ssc#S40022499 | tan       | 338.47 | 39.7213 | 0.990598 | 0.001093 | 8.198    |
| gnl UG Ssc#S40024674 | salmon    | 222.91 | 24.9717 | 0.923976 | 0.024874 | 24.616   |
| gnl UG Ssc#S40034650 | brown     | 286.59 | 99.3936 | 0.922768 | 0.025464 | 50.096   |
| gnl UG Ssc#S40034722 | tan       | 293.72 | 38.1854 | 0.983714 | 0.002489 | 254.708  |
| gnl UG Ssc#S40035688 | darkgreen | 229.78 | 19.4497 | 0.949396 | 0.013561 | 3.628    |
| gnl UG Ssc#S40037863 | grey60    | 265.12 | 32.5653 | 0.993788 | 0.000587 | 78.852   |

|                      |           |        |         |          |          |          |
|----------------------|-----------|--------|---------|----------|----------|----------|
| gnl UG Ssc#S40038955 | black     | 278.45 | 39.5795 | 0.983889 | 0.002449 | 344.28   |
| gnl UG Ssc#S40039005 | turquoise | 631.28 | 626.717 | 0.780415 | 0.119369 | 10.99    |
| gnl UG Ssc#S40039737 | turquoise | 1554.9 | 1554.56 | 0.996619 | 0.000236 | 11.828   |
| gnl UG Ssc#S40042081 | brown     | 246.5  | 127.288 | 0.994426 | 0.000499 | 19.844   |
| gnl UG Ssc#S40042631 | tan       | 238.38 | 32.4764 | 0.949446 | 0.013541 | 2607.526 |
| gnl UG Ssc#S40042784 | turquoise | 287.09 | 272.721 | 0.597965 | 0.286832 | 24.444   |
| gnl UG Ssc#S40043958 | yellow    | 295.36 | 56.4998 | 0.858643 | 0.062428 | 97.33    |
| gnl UG Ssc#S40044675 | turquoise | 1495.2 | 1494.66 | 0.987146 | 0.001746 | 11.35    |
| gnl UG Ssc#S40045135 | grey      | 97.69  | 1.20606 | -0.30465 | 0.618191 | 19.016   |
| gnl UG Ssc#S40045387 | turquoise | 932.08 | 930.277 | 0.868363 | 0.056187 | 11.942   |
| gnl UG Ssc#S40046162 | turquoise | 1413.7 | 1412.88 | 0.975681 | 0.004536 | 5.136    |
| gnl UG Ssc#S40047541 | grey      | 63.06  | 7.97278 | -0.08854 | 0.887414 | 3.086    |
| gnl UG Ssc#S40047900 | turquoise | 873.33 | 871.533 | 0.860323 | 0.061335 | 9.81     |
| gnl UG Ssc#S40048435 | turquoise | 243.65 | 228.014 | 0.55444  | 0.332117 | 39.73    |
| gnl UG Ssc#S40048913 | turquoise | 1464.8 | 1464.2  | 0.98385  | 0.002458 | 28.18    |
| gnl UG Ssc#S40048956 | tan       | 223.16 | 30.1347 | 0.933309 | 0.020467 | 49.726   |
| gnl UG Ssc#S40049940 | turquoise | 1541.8 | 1541.28 | 0.996154 | 0.000286 | 4.234    |
| gnl UG Ssc#S40049981 | yellow    | 238.93 | 82.9964 | 0.991442 | 0.000949 | 79.732   |
| gnl UG Ssc#S40050544 | magenta   | 341.15 | 40.0562 | 0.968451 | 0.006695 | 37.284   |
| gnl UG Ssc#S40050849 | turquoise | 336.61 | 308.886 | 0.592829 | 0.292086 | 24.326   |
| gnl UG Ssc#S40050895 | turquoise | 1546.4 | 1545.94 | 0.996564 | 0.000242 | 4.612    |
| gnl UG Ssc#S40051540 | tan       | 341.21 | 37.5312 | 0.976846 | 0.004215 | 44.178   |
| gnl UG Ssc#S40052404 | darkgreen | 254.44 | 23.1669 | 0.987114 | 0.001753 | 61.444   |
| gnl UG Ssc#S40053273 | yellow    | 223.09 | 83.9961 | 0.994757 | 0.000455 | 335.016  |
| gnl UG Ssc#S40053418 | yellow    | 155.88 | 56.8861 | 0.89652  | 0.039333 | 148.696  |
| gnl UG Ssc#S40054185 | grey      | 85.948 | 10.057  | 0.302185 | 0.621184 | 91.598   |
| gnl UG Ssc#S40054290 | turquoise | 276.31 | 244.351 | 0.533151 | 0.354864 | 31.532   |
| gnl UG Ssc#S40055771 | turquoise | 1389.9 | 1389.35 | 0.969899 | 0.006241 | 3.624    |
| gnl UG Ssc#S40055820 | green     | 241.56 | 54.2497 | 0.991315 | 0.00097  | 7.49     |
| gnl UG Ssc#S40055957 | purple    | 200.16 | 31.0912 | 0.955499 | 0.011194 | 23.418   |
| gnl UG Ssc#S40059478 | blue      | 279.75 | 138.896 | 0.970131 | 0.006169 | 22.852   |
| gnl UG Ssc#S40060284 | tan       | 180.58 | 23.5288 | 0.874682 | 0.052242 | 4.768    |
| gnl UG Ssc#S40060840 | darkgreen | 308.97 | 22.0418 | 0.984647 | 0.002278 | 75.742   |
| gnl UG Ssc#S40061661 | grey      | 38.201 | 0.12932 | 0.074195 | 0.905619 | 29.024   |
| gnl UG Ssc#S40063653 | yellow    | 127.4  | 39.0237 | 0.788392 | 0.113069 | 5.074    |
| gnl UG Ssc#S40064881 | brown     | 190.11 | 108.4   | 0.953969 | 0.011773 | 17.614   |
| gnl UG Ssc#S40066476 | turquoise | 1261   | 1259.69 | 0.951466 | 0.012741 | 80.588   |
| gnl UG Ssc#S40068231 | turquoise | 133.59 | 92.0379 | 0.309266 | 0.612601 | 15.052   |
| gnl UG Ssc#S40069929 | turquoise | 1434.6 | 1434.16 | 0.978241 | 0.00384  | 9.78     |
| gnl UG Ssc#S40070781 | turquoise | 1511.6 | 1511.21 | 0.988495 | 0.001479 | 10.914   |
| gnl UG Ssc#S40072585 | brown     | 180.49 | 98.8747 | 0.940703 | 0.017178 | 7.038    |
| gnl UG Ssc#S40073180 | red       | 218.14 | 46.9651 | 0.973534 | 0.005148 | 114.234  |
| gnl UG Ssc#S40077180 | blue      | 325.23 | 133.004 | 0.961633 | 0.008969 | 12.266   |
| gnl UG Ssc#S40077859 | turquoise | 143.56 | 118.473 | 0.398076 | 0.506878 | 0.866    |
| gnl UG Ssc#S40078819 | turquoise | 998.16 | 995.504 | 0.895088 | 0.040143 | 29.618   |
| gnl UG Ssc#S40079585 | turquoise | 1009.9 | 1007.14 | 0.896682 | 0.039242 | 35.346   |
| gnl UG Ssc#S40082625 | blue      | 284.24 | 141.726 | 0.974441 | 0.004886 | 7.248    |
| gnl UG Ssc#S40082993 | turquoise | 765.93 | 760.902 | 0.830469 | 0.081629 | 4.61     |

|                      |               |        |         |          |          |         |
|----------------------|---------------|--------|---------|----------|----------|---------|
| gnl UG Ssc#S40084501 | turquoise     | 1553.6 | 1553.18 | 0.996528 | 0.000245 | 0.566   |
| gnl UG Ssc#S40084519 | turquoise     | 437.39 | 429.765 | 0.698017 | 0.189926 | 6.878   |
| gnl UG Ssc#S40084984 | turquoise     | 1066.5 | 1064.35 | 0.913335 | 0.030225 | 7.33    |
| gnl UG Ssc#S40086007 | turquoise     | 1553.6 | 1553.18 | 0.996528 | 0.000245 | 1.842   |
| gnl UG Ssc#S40087890 | turquoise     | 1203.1 | 1201.59 | 0.938108 | 0.018311 | 3.076   |
| gnl UG Ssc#S40089767 | purple        | 189.72 | 33.1839 | 0.97863  | 0.003738 | 119.576 |
| gnl UG Ssc#S40091110 | turquoise     | 458.17 | 455.866 | 0.736375 | 0.155901 | 26.372  |
| gnl UG Ssc#S40091442 | brown         | 300.79 | 106.932 | 0.939071 | 0.017888 | 5.046   |
| gnl UG Ssc#S40091470 | turquoise     | 1390.8 | 1390.32 | 0.970042 | 0.006196 | 42.53   |
| gnl UG Ssc#S40092912 | turquoise     | 1485.6 | 1485.13 | 0.984887 | 0.002225 | 1.924   |
| gnl UG Ssc#S40094025 | blue          | 311.15 | 151.787 | 0.990237 | 0.001156 | 19.254  |
| gnl UG Ssc#S40094148 | turquoise     | 1500   | 1499.53 | 0.989792 | 0.001236 | 4.616   |
| gnl UG Ssc#S40094285 | brown         | 142.65 | 66.9036 | 0.853929 | 0.065528 | 19.57   |
| gnl UG Ssc#S40094835 | red           | 162.54 | 42.5166 | 0.951359 | 0.012783 | 3.632   |
| gnl UG Ssc#S40094925 | turquoise     | 1303.7 | 1302.45 | 0.956844 | 0.010692 | 2.366   |
| gnl UG Ssc#S40095003 | turquoise     | 1486.1 | 1485.42 | 0.987871 | 0.001601 | 3.306   |
| gnl UG Ssc#S40095231 | turquoise     | 1553.6 | 1553.18 | 0.996528 | 0.000245 | 0.33    |
| gnl UG Ssc#S40095449 | turquoise     | 571.78 | 569.303 | 0.782033 | 0.118082 | 2.84    |
| gnl UG Ssc#S40095498 | red           | 261.98 | 44.8398 | 0.958168 | 0.010206 | 7.8     |
| gnl UG Ssc#S40096829 | turquoise     | 1183.3 | 1181.65 | 0.9347   | 0.019834 | 49.04   |
| gnl UG Ssc#S40097075 | brown         | 247.75 | 122.505 | 0.983429 | 0.002554 | 3.514   |
| gnl UG Ssc#S40097724 | turquoise     | 420.7  | 418.301 | 0.703981 | 0.184511 | 3.51    |
| gnl UG Ssc#S40097726 | brown         | 250.76 | 124.844 | 0.989277 | 0.001331 | 4.216   |
| gnl UG Ssc#S40098899 | turquoise     | 1553.6 | 1553.18 | 0.996528 | 0.000245 | 0.188   |
| gnl UG Ssc#S40099212 | turquoise     | 1553.6 | 1553.18 | 0.996528 | 0.000245 | 0.094   |
| gnl UG Ssc#S40099717 | blue          | 328.23 | 156.631 | 0.997348 | 0.000164 | 4.446   |
| gnl UG Ssc#S40100108 | turquoise     | 1446.1 | 1445.37 | 0.981422 | 0.003031 | 14.222  |
| gnl UG Ssc#S40100454 | royalblue     | 231.28 | 23.9492 | 0.975702 | 0.00453  | 24.29   |
| gnl UG Ssc#S40101480 | brown         | 336.56 | 78.2128 | 0.852668 | 0.066366 | 6.33    |
| gnl UG Ssc#S40102872 | turquoise     | 1062.7 | 1060.23 | 0.907871 | 0.0331   | 1.898   |
| gnl UG Ssc#S40102974 | black         | 172.98 | 22.8535 | 0.837635 | 0.076596 | 11.012  |
| gnl UG Ssc#S40103595 | turquoise     | 1553.6 | 1553.18 | 0.996528 | 0.000245 | 0.142   |
| gnl UG Ssc#S40104089 | turquoise     | 1198.1 | 1197.11 | 0.92976  | 0.02211  | 44.884  |
| gnl UG Ssc#S40105175 | turquoise     | 887.09 | 885.887 | 0.875    | 0.052046 | 0.572   |
| gnl UG Ssc#S40106146 | turquoise     | 1494.7 | 1494.16 | 0.98951  | 0.001288 | 31.522  |
| gnl UG Ssc#S40106217 | grey60        | 239.18 | 32.8524 | 0.995969 | 0.000307 | 26.042  |
| gnl UG Ssc#S40106548 | turquoise     | 1553.6 | 1553.18 | 0.996528 | 0.000245 | 0.756   |
| gnl UG Ssc#S40106937 | turquoise     | 1531.5 | 1531.17 | 0.992445 | 0.000787 | 2.514   |
| gnl UG Ssc#S40106980 | brown         | 260.04 | 128.699 | 0.995271 | 0.00039  | 8.12    |
| gnl UG Ssc#S40107966 | turquoise     | 195.38 | 139.561 | 0.396771 | 0.508403 | 4.52    |
| gnl UG Ssc#S40108865 | tan           | 266.68 | 36.9815 | 0.976568 | 0.004291 | 53.896  |
| gnl UG Ssc#S40110548 | darkturquoise | 141.95 | 14.0927 | 0.933501 | 0.020379 | 12.302  |
| gnl UG Ssc#S40110625 | turquoise     | 634.69 | 629.049 | 0.79451  | 0.108307 | 15.658  |
| gnl UG Ssc#S40110683 | turquoise     | 153.12 | 81.6637 | 0.222371 | 0.71922  | 40.778  |
| gnl UG Ssc#S40111130 | brown         | 236.99 | 120.508 | 0.981167 | 0.003094 | 4.664   |
| gnl UG Ssc#S40117649 | blue          | 262.95 | 119.742 | 0.936975 | 0.018813 | 21.326  |
| gnl UG Ssc#S40125669 | magenta       | 304.91 | 34.5013 | 0.938645 | 0.018075 | 7.002   |
| gnl UG Ssc#S40127760 | grey60        | 257.77 | 33.2675 | 0.998595 | 6.32E-05 | 19.582  |



|                      |            |        |         |          |          |         |
|----------------------|------------|--------|---------|----------|----------|---------|
| gnl UG Ssc#S40127774 | magenta    | 263.2  | 26.4512 | 0.883117 | 0.047119 | 137.98  |
| gnl UG Ssc#S40131124 | turquoise  | 1503.2 | 1502.68 | 0.988769 | 0.001426 | 3.6     |
| gnl UG Ssc#S40132479 | turquoise  | 242.59 | 199.02  | 0.469179 | 0.425327 | 2.538   |
| gnl UG Ssc#S40133187 | darkgreen  | 258.81 | 22.0524 | 0.980197 | 0.003335 | 6.706   |
| gnl UG Ssc#S40141315 | purple     | 194.29 | 28.5028 | 0.936436 | 0.019053 | 24.236  |
| gnl UG Ssc#S40141829 | turquoise  | 842.54 | 840.434 | 0.866293 | 0.057499 | 104.494 |
| gnl UG Ssc#S40143363 | turquoise  | 641.93 | 636.162 | 0.792723 | 0.109692 | 34.224  |
| gnl UG Ssc#S40143536 | pink       | 224    | 44.9497 | 0.983566 | 0.002523 | 57.318  |
| gnl UG Ssc#S40143544 | blue       | 345.9  | 140.006 | 0.972425 | 0.005474 | 27.798  |
| gnl UG Ssc#S40144447 | yellow     | 163.93 | 39.9167 | 0.784171 | 0.116389 | 61.212  |
| gnl UG Ssc#S40144457 | yellow     | 108.9  | 48.4919 | 0.834842 | 0.078545 | 103.862 |
| gnl UG Ssc#S40146297 | lightgreen | 87.877 | 6.38143 | 0.516511 | 0.372898 | 24.542  |
| gnl UG Ssc#S40146561 | green      | 145.43 | 36.9012 | 0.903744 | 0.035327 | 17.814  |
| gnl UG Ssc#S40146833 | yellow     | 230.58 | 77.3048 | 0.9725   | 0.005452 | 15.862  |
| gnl UG Ssc#S40148087 | turquoise  | 1536.6 | 1536.12 | 0.994865 | 0.000441 | 13.178  |
| gnl UG Ssc#S40148092 | grey60     | 284.8  | 28.8548 | 0.968384 | 0.006716 | 105.28  |
| gnl UG Ssc#S40149693 | magenta    | 278.79 | 34.329  | 0.937658 | 0.01851  | 55.084  |
| gnl UG Ssc#S40149996 | blue       | 318.4  | 155.358 | 0.995471 | 0.000366 | 15.31   |
| gnl UG Ssc#S40150666 | navy       | 243.62 | 33.0685 | 0.990737 | 0.001069 | 16.406  |
| gnl UG Ssc#S40152348 | black      | 281.35 | 38.205  | 0.94574  | 0.015048 | 25.23   |
| gnl UG Ssc#S40153033 | brown      | 228.31 | 124.072 | 0.988725 | 0.001435 | 9.866   |
| gnl UG Ssc#S40153514 | darkgreen  | 286.81 | 8.75994 | 0.765439 | 0.131466 | 100.71  |
| gnl UG Ssc#S40154377 | brown      | 253.38 | 129.421 | 0.997203 | 0.000177 | 3.47    |
| gnl UG Ssc#S40154544 | turquoise  | 1538.9 | 1538.43 | 0.996055 | 0.000297 | 151.586 |
| gnl UG Ssc#S40154742 | blue       | 299.5  | 142.609 | 0.976175 | 0.004399 | 7.128   |
| gnl UG Ssc#S40154789 | salmon     | 250.59 | 25.832  | 0.937018 | 0.018794 | 42.914  |
| gnl UG Ssc#S40155274 | green      | 120.46 | 33.05   | 0.871932 | 0.053947 | 1.354   |
| gnl UG Ssc#S40156252 | turquoise  | 1510   | 1509.59 | 0.988392 | 0.001499 | 7.294   |
| gnl UG Ssc#S40156624 | turquoise  | 1471.1 | 1470.71 | 0.984413 | 0.00233  | 2.272   |
| gnl UG Ssc#S40156654 | turquoise  | 862.06 | 857.677 | 0.857787 | 0.062988 | 3.532   |
| gnl UG Ssc#S40157220 | turquoise  | 1525.1 | 1524.73 | 0.992139 | 0.000836 | 74.016  |
| gnl UG Ssc#S40158599 | grey60     | 266.69 | 30.3464 | 0.978946 | 0.003656 | 23.818  |
| gnl UG Ssc#S40159132 | royalblue  | 234.13 | 23.8725 | 0.9748   | 0.004784 | 21.816  |
| gnl UG Ssc#S40160168 | turquoise  | 1565.6 | 1565.18 | 0.99872  | 5.50E-05 | 7.422   |
| gnl UG Ssc#S40162503 | lightgreen | 86.407 | 7.35547 | 0.782137 | 0.118    | 125.582 |
| gnl UG Ssc#S40163661 | lightgreen | 59.513 | 16.9296 | 0.993902 | 0.000571 | 11.904  |
| gnl UG Ssc#S40170485 | turquoise  | 318.94 | 308.528 | 0.642805 | 0.242064 | 32.714  |
| gnl UG Ssc#S40171668 | black      | 123.17 | 15.5178 | 0.698422 | 0.189557 | 62.2    |
| gnl UG Ssc#S40172065 | turquoise  | 1498.1 | 1497.56 | 0.988637 | 0.001452 | 9.894   |
| gnl UG Ssc#S40173770 | turquoise  | 1186.6 | 1184.97 | 0.937828 | 0.018434 | 195.028 |
| gnl UG Ssc#S40174573 | lightcyan  | 278.59 | 23.6371 | 0.957497 | 0.010452 | 9.68    |
| gnl UG Ssc#S40174963 | red        | 254.92 | 46.5423 | 0.968649 | 0.006632 | 136.212 |
| gnl UG Ssc#S40175618 | turquoise  | 1511.7 | 1511.28 | 0.988904 | 0.001401 | 2.028   |
| gnl UG Ssc#S40177122 | turquoise  | 1082.8 | 1080.95 | 0.913073 | 0.030361 | 34.184  |
| gnl UG Ssc#S40180694 | tan        | 310.85 | 36.7435 | 0.973909 | 0.005039 | 53.082  |
| gnl UG Ssc#S40182904 | turquoise  | 970.48 | 968.237 | 0.892993 | 0.041338 | 24.522  |
| gnl UG Ssc#S40184013 | lightgreen | 72.008 | 9.47914 | 0.859072 | 0.062148 | 97.54   |
| gnl UG Ssc#S40186233 | blue       | 300.67 | 131.331 | 0.956686 | 0.01075  | 753.842 |

|                      |              |        |         |          |          |         |
|----------------------|--------------|--------|---------|----------|----------|---------|
| gnl UG Ssc#S40191766 | brown        | 332.99 | 86.2968 | 0.878751 | 0.04975  | 5.004   |
| gnl UG Ssc#S40193201 | black        | 296.54 | 36.0234 | 0.941093 | 0.01701  | 41.136  |
| gnl UG Ssc#S40195327 | blue         | 337.23 | 139.161 | 0.971184 | 0.005846 | 161.268 |
| gnl UG Ssc#S40196887 | blue         | 314.1  | 145.041 | 0.979922 | 0.003405 | 29.41   |
| gnl UG Ssc#S40204438 | blue         | 290.05 | 144.83  | 0.979306 | 0.003563 | 22.922  |
| gnl UG Ssc#S40204678 | turquoise    | 1508.7 | 1508.2  | 0.990888 | 0.001043 | 95.958  |
| gnl UG Ssc#S40205238 | turquoise    | 1431.8 | 1431.25 | 0.974731 | 0.004804 | 8.128   |
| gnl UG Ssc#S40206941 | blue         | 337.61 | 124.709 | 0.947254 | 0.014426 | 81.838  |
| gnl UG Ssc#S40207636 | turquoise    | 1515.9 | 1515.47 | 0.991974 | 0.000862 | 1.79    |
| gnl UG Ssc#S40210420 | turquoise    | 177.92 | 88.5632 | 0.227912 | 0.712346 | 21.712  |
| gnl UG Ssc#S40212608 | turquoise    | 290.71 | 282.43  | 0.614836 | 0.269752 | 0.56    |
| gnl UG Ssc#S40213312 | pink         | 264.87 | 41.6466 | 0.964341 | 0.00804  | 100.3   |
| gnl UG Ssc#S40214545 | turquoise    | 1151.2 | 1150.24 | 0.922455 | 0.025618 | 3.15    |
| gnl UG Ssc#S40214866 | black        | 251.47 | 38.6268 | 0.977233 | 0.00411  | 11.566  |
| gnl UG Ssc#S40215438 | turquoise    | 1378.4 | 1377.93 | 0.969825 | 0.006264 | 2.18    |
| gnl UG Ssc#S40215563 | brown        | 154.56 | 90.1645 | 0.905508 | 0.03437  | 2.694   |
| gnl UG Ssc#S40219335 | green        | 231.18 | 54.24   | 0.990287 | 0.001148 | 4.696   |
| gnl UG Ssc#S40224927 | pink         | 193.88 | 45.1484 | 0.985922 | 0.002001 | 5.624   |
| gnl UG Ssc#S40226524 | navy         | 284.11 | 27.3479 | 0.940009 | 0.017479 | 33.8    |
| gnl UG Ssc#S40227949 | brown        | 172.27 | 91.062  | 0.907741 | 0.03317  | 10.148  |
| gnl UG Ssc#S40232606 | magenta      | 316.58 | 39.2236 | 0.966911 | 0.007189 | 17.432  |
| gnl UG Ssc#S40234755 | turquoise    | 1523.9 | 1523.46 | 0.993015 | 0.0007   | 4.004   |
| gnl UG Ssc#S40235024 | turquoise    | 98.603 | 90.8553 | 0.418834 | 0.482754 | 30.086  |
| gnl UG Ssc#S40237707 | turquoise    | 1515.7 | 1515.32 | 0.990095 | 0.001182 | 2.094   |
| gnl UG Ssc#S40238117 | turquoise    | 668.22 | 665.288 | 0.797849 | 0.105735 | 31.56   |
| gnl UG Ssc#S40239504 | turquoise    | 176.5  | 71.5085 | 0.187012 | 0.763285 | 12.454  |
| gnl UG Ssc#S40239854 | turquoise    | 1523.7 | 1523.3  | 0.991042 | 0.001016 | 2.086   |
| gnl UG Ssc#S40242427 | turquoise    | 457.92 | 445.032 | 0.697117 | 0.190747 | 1.586   |
| gnl UG Ssc#S40247487 | turquoise    | 1343.5 | 1342.69 | 0.964811 | 0.007882 | 22.562  |
| gnl UG Ssc#S40258460 | turquoise    | 658.27 | 652.432 | 0.797115 | 0.106299 | 29.244  |
| gnl UG Ssc#S40262471 | turquoise    | 439.59 | 434.273 | 0.725758 | 0.165123 | 0.178   |
| gnl UG Ssc#S40262955 | darkgreen    | 247.69 | 21.8704 | 0.974866 | 0.004765 | 4.81    |
| gnl UG Ssc#S40265049 | brown        | 243.06 | 129.098 | 0.997729 | 0.00013  | 6.334   |
| gnl UG Ssc#S40267793 | midnightblue | 260.68 | 32.4203 | 0.970941 | 0.00592  | 93.876  |
| gnl UG Ssc#S40268747 | royalblue    | 164.51 | 24.0165 | 0.974676 | 0.004819 | 4.754   |
| gnl UG Ssc#S40271107 | green        | 267.48 | 46.6125 | 0.946158 | 0.014876 | 18.514  |
| gnl UG Ssc#S40272618 | midnightblue | 267.43 | 29.9221 | 0.95326  | 0.012045 | 69.936  |
| gnl UG Ssc#S40276387 | magenta      | 322.78 | 44.3732 | 0.993164 | 0.000678 | 9.302   |
| gnl UG Ssc#S40277991 | turquoise    | 1464.6 | 1464.12 | 0.984639 | 0.00228  | 10.982  |
| gnl UG Ssc#S40284317 | brown        | 255.29 | 111.168 | 0.957403 | 0.010486 | 5.026   |
| gnl UG Ssc#S40287461 | purple       | 181.44 | 26.5706 | 0.92055  | 0.02656  | 29.874  |
| gnl UG Ssc#S40288024 | green        | 150.39 | 28.4008 | 0.827036 | 0.084075 | 10.21   |
| gnl UG Ssc#S40288165 | turquoise    | 1544.7 | 1544.35 | 0.995361 | 0.000379 | 2.15    |
| gnl UG Ssc#S40288641 | turquoise    | 1518.9 | 1518.49 | 0.992802 | 0.000732 | 5.722   |
| gnl UG Ssc#S40288802 | black        | 140.2  | 17.95   | 0.753888 | 0.14103  | 141.052 |
| gnl UG Ssc#S40290915 | turquoise    | 1441.9 | 1441.44 | 0.976391 | 0.004339 | 6.31    |
| gnl UG Ssc#S40291311 | blue         | 346.59 | 114.742 | 0.926242 | 0.023779 | 12.25   |
| gnl UG Ssc#S40291735 | black        | 242.08 | 36.3866 | 0.939469 | 0.017714 | 28.58   |

|                      |              |        |         |          |          |         |
|----------------------|--------------|--------|---------|----------|----------|---------|
| gnl UG Ssc#S40292473 | turquoise    | 1051.9 | 1050.13 | 0.900905 | 0.036885 | 6.71    |
| gnl UG Ssc#S40295633 | turquoise    | 1524.8 | 1524.32 | 0.992609 | 0.000762 | 0.996   |
| gnl UG Ssc#S40301371 | turquoise    | 687.45 | 686.417 | 0.820038 | 0.089129 | 16.202  |
| gnl UG Ssc#S40312675 | blue         | 312.7  | 146.085 | 0.981612 | 0.002985 | 28.038  |
| gnl UG Ssc#S40315766 | blue         | 336.96 | 120.421 | 0.936764 | 0.018907 | 32.216  |
| gnl UG Ssc#S40318462 | darkred      | 32.198 | 1.7376  | 0.20024  | 0.746761 | 242.476 |
| gnl UG Ssc#S40322346 | black        | 277.57 | 42.7209 | 0.989554 | 0.00128  | 128.266 |
| gnl UG Ssc#S40323161 | brown        | 251.81 | 127.682 | 0.995382 | 0.000376 | 10.086  |
| gnl UG Ssc#S40324300 | turquoise    | 144.97 | 132.367 | 0.44542  | 0.452229 | 42.096  |
| gnl UG Ssc#S40327466 | turquoise    | 1554.6 | 1554.24 | 0.997079 | 0.000189 | 4.044   |
| gnl UG Ssc#S40327511 | turquoise    | 499.4  | 493.874 | 0.720676 | 0.169592 | 4.056   |
| gnl UG Ssc#S40329149 | turquoise    | 1147.9 | 1146.12 | 0.929734 | 0.022122 | 19.584  |
| gnl UG Ssc#S40330262 | turquoise    | 1554.1 | 1553.73 | 0.996738 | 0.000224 | 73.226  |
| gnl UG Ssc#S40334339 | turquoise    | 1460.9 | 1460.49 | 0.982577 | 0.002753 | 11.858  |
| gnl UG Ssc#S40334954 | blue         | 272.44 | 131.513 | 0.956888 | 0.010676 | 58.798  |
| gnl UG Ssc#S40335524 | navy         | 270.38 | 32.8698 | 0.984972 | 0.002206 | 26.046  |
| gnl UG Ssc#S40335680 | turquoise    | 1058.4 | 1057.34 | 0.913083 | 0.030356 | 3.91    |
| gnl UG Ssc#S40335794 | turquoise    | 1561.8 | 1561.39 | 0.997884 | 0.000117 | 4.382   |
| gnl UG Ssc#S40336522 | turquoise    | 1534.2 | 1533.86 | 0.99344  | 0.000637 | 4.15    |
| gnl UG Ssc#S40340051 | turquoise    | 1364.9 | 1363.86 | 0.967429 | 0.007022 | 23.636  |
| gnl UG Ssc#S40340827 | turquoise    | 198.94 | 182.465 | 0.504444 | 0.38611  | 52.56   |
| gnl UG Ssc#S40349544 | turquoise    | 1571.2 | 1570.83 | 0.999632 | 8.46E-06 | 116.172 |
| gnl UG Ssc#S40356278 | turquoise    | 1506.4 | 1506.03 | 0.989978 | 0.001203 | 16.836  |
| gnl UG Ssc#S40358887 | brown        | 272.91 | 126.619 | 0.988816 | 0.001417 | 4.398   |
| gnl UG Ssc#S40367565 | turquoise    | 1070.5 | 1069.29 | 0.903723 | 0.035338 | 5.012   |
| gnl UG Ssc#S40370377 | lightcyan    | 304.77 | 25.269  | 0.978239 | 0.003841 | 127.348 |
| gnl UG Ssc#S40376380 | lightcyan    | 226.28 | 18.4389 | 0.896457 | 0.039369 | 22.354  |
| gnl UG Ssc#S40377740 | midnightblue | 264.75 | 34.0263 | 0.980838 | 0.003175 | 214.666 |
| gnl UG Ssc#S40385100 | turquoise    | 600.97 | 597.452 | 0.766707 | 0.130428 | 18.302  |
| gnl UG Ssc#S40386137 | black        | 294.94 | 39.4413 | 0.962282 | 0.008743 | 25.588  |
| gnl UG Ssc#S40388648 | navy         | 151.42 | 16.5793 | 0.826436 | 0.084505 | 0.664   |
| gnl UG Ssc#S40389825 | turquoise    | 1553.7 | 1553.24 | 0.998148 | 9.56E-05 | 11.556  |
| gnl UG Ssc#S40390861 | darkgreen    | 221.1  | 8.1352  | 0.756068 | 0.13921  | 143.678 |
| gnl UG Ssc#S40396824 | pink         | 227.28 | 47.4927 | 0.996522 | 0.000246 | 46.79   |
| gnl UG Ssc#S40397505 | turquoise    | 1537.8 | 1537.41 | 0.994007 | 0.000556 | 3.208   |
| gnl UG Ssc#S40400100 | purple       | 83.621 | 6.62668 | 0.589037 | 0.295981 | 0.854   |
| gnl UG Ssc#S40400469 | turquoise    | 1352.1 | 1351.08 | 0.966403 | 0.007355 | 2.116   |
| gnl UG Ssc#S40401313 | tan          | 282.84 | 37.8877 | 0.982277 | 0.002825 | 945.06  |
| gnl UG Ssc#S40403544 | turquoise    | 1553.6 | 1553.18 | 0.996528 | 0.000245 | 0.426   |
| gnl UG Ssc#S40406739 | blue         | 271.27 | 110.761 | 0.918297 | 0.027688 | 50.392  |
| gnl UG Ssc#S40407699 | turquoise    | 477.62 | 472.676 | 0.714253 | 0.175289 | 19.302  |
| gnl UG Ssc#S40414470 | salmon       | 125.5  | 27.0083 | 0.958515 | 0.01008  | 59.78   |
| gnl UG Ssc#S40416565 | turquoise    | 1539.8 | 1539.37 | 0.994867 | 0.000441 | 6.59    |
| gnl UG Ssc#S40416576 | blue         | 346.03 | 125.874 | 0.947023 | 0.014521 | 6.818   |
| gnl UG Ssc#S40424734 | brown        | 236.46 | 129.447 | 0.999539 | 1.19E-05 | 33.396  |
| gnl UG Ssc#S40426021 | darkred      | 62.86  | 11.8891 | 0.909178 | 0.032405 | 34.334  |
| gnl UG Ssc#S40426329 | turquoise    | 741.13 | 737.135 | 0.831483 | 0.08091  | 38.78   |
| gnl UG Ssc#S40427363 | brown        | 254.72 | 129.822 | 0.998196 | 9.20E-05 | 12.6    |

|                      |              |        |         |          |          |         |
|----------------------|--------------|--------|---------|----------|----------|---------|
| gnl UG Ssc#S40429450 | turquoise    | 1498.2 | 1497.62 | 0.988803 | 0.00142  | 2.834   |
| gnl UG Ssc#S40429630 | turquoise    | 1555.5 | 1555.08 | 0.996829 | 0.000214 | 14.592  |
| gnl UG Ssc#S40430442 | blue         | 326.16 | 147.547 | 0.983784 | 0.002473 | 8.286   |
| gnl UG Ssc#S40433705 | blue         | 330.78 | 135.383 | 0.964025 | 0.008147 | 16.148  |
| gnl UG Ssc#S40435051 | turquoise    | 1488.4 | 1487.81 | 0.988991 | 0.001384 | 0.694   |
| gnl UG Ssc#S40437142 | brown        | 244.46 | 112.48  | 0.964481 | 0.007993 | 6.042   |
| gnl UG Ssc#S40437350 | black        | 294.18 | 35.5007 | 0.931795 | 0.021162 | 65.074  |
| gnl UG Ssc#S40437415 | turquoise    | 739.35 | 736.61  | 0.815475 | 0.092473 | 28.142  |
| gnl UG Ssc#S40437556 | darkgreen    | 309.13 | 22.2115 | 0.985897 | 0.002006 | 18.598  |
| gnl UG Ssc#S40438133 | turquoise    | 1504   | 1503.59 | 0.987792 | 0.001616 | 10.156  |
| gnl UG Ssc#S40438408 | yellow       | 213.43 | 73.8456 | 0.967481 | 0.007005 | 47.9    |
| gnl UG Ssc#S40439319 | turquoise    | 1506.6 | 1506.23 | 0.988665 | 0.001446 | 17.45   |
| gnl UG Ssc#S40439733 | turquoise    | 453.58 | 448.946 | 0.713077 | 0.176338 | 16.924  |
| gnl UG Ssc#S40440480 | darkred      | 78.144 | 11.4817 | 0.858681 | 0.062403 | 253.192 |
| gnl UG Ssc#S40440719 | turquoise    | 387.65 | 379.653 | 0.672841 | 0.213264 | 13.286  |
| gnl UG Ssc#S40441928 | turquoise    | 1231.9 | 1230.3  | 0.943096 | 0.016155 | 0.784   |
| gnl UG Ssc#S40442316 | green        | 159.1  | 30.8691 | 0.825108 | 0.085458 | 85.37   |
| gnl UG Ssc#S40442649 | turquoise    | 1553.6 | 1553.18 | 0.996528 | 0.000245 | 1.04    |
| gnl UG Ssc#S40442878 | navy         | 220.27 | 28.2332 | 0.955066 | 0.011357 | 107.69  |
| gnl UG Ssc#S40443043 | turquoise    | 1555.8 | 1555.34 | 0.998131 | 9.70E-05 | 6.88    |
| gnl UG Ssc#S40443068 | tan          | 326.64 | 37.5364 | 0.978635 | 0.003737 | 165.472 |
| gnl UG Ssc#S40443177 | turquoise    | 1545.1 | 1544.73 | 0.995811 | 0.000325 | 1.492   |
| gnl UG Ssc#S40443438 | turquoise    | 421.04 | 402.422 | 0.669096 | 0.2168   | 91.56   |
| gnl UG Ssc#S40452557 | turquoise    | 1516.5 | 1516.06 | 0.992847 | 0.000725 | 7.322   |
| gnl UG Ssc#S40453605 | brown        | 204.75 | 118.162 | 0.976965 | 0.004182 | 10.562  |
| gnl UG Ssc#S40463925 | turquoise    | 1437.7 | 1437.27 | 0.977646 | 0.003999 | 7.082   |
| gnl UG Ssc#S40464521 | turquoise    | 1507.1 | 1506.71 | 0.989505 | 0.001289 | 18.556  |
| gnl UG Ssc#S40466766 | turquoise    | 1492.4 | 1491.94 | 0.987708 | 0.001633 | 6.384   |
| gnl UG Ssc#S40471332 | royalblue    | 262.36 | 21.3006 | 0.945486 | 0.015153 | 6.64    |
| gnl UG Ssc#S40471679 | turquoise    | 296.64 | 272.11  | 0.581551 | 0.303709 | 12.918  |
| gnl UG Ssc#S40471826 | turquoise    | 1558.5 | 1558.07 | 0.997635 | 0.000138 | 22.148  |
| gnl UG Ssc#S40472465 | turquoise    | 34.304 | 24.4605 | 0.161854 | 0.794824 | 27.974  |
| gnl UG Ssc#S40474141 | blue         | 288.95 | 139.203 | 0.970517 | 0.00605  | 60.248  |
| gnl UG Ssc#S40474257 | turquoise    | 1496.1 | 1495.71 | 0.986645 | 0.001849 | 11.59   |
| gnl UG Ssc#S40474761 | blue         | 280.31 | 140.047 | 0.971726 | 0.005683 | 7.862   |
| gnl UG Ssc#S40474839 | turquoise    | 207.35 | 183.051 | 0.487454 | 0.404893 | 10.9    |
| gnl UG Ssc#S40475158 | turquoise    | 267.85 | 252.156 | 0.577142 | 0.308285 | 21.038  |
| gnl UG Ssc#S40475244 | midnightblue | 192.07 | 33.8993 | 0.980254 | 0.003321 | 4.588   |
| gnl UG Ssc#S40475596 | pink         | 213.71 | 45.6019 | 0.98803  | 0.001569 | 12.708  |
| gnl UG Ssc#S40475805 | turquoise    | 604.12 | 598.501 | 0.778794 | 0.120661 | 149.58  |
| gnl UG Ssc#S40476333 | blue         | 201.07 | 88.2975 | 0.868289 | 0.056234 | 209.32  |
| gnl UG Ssc#S40476889 | brown        | 308.28 | 105.086 | 0.939177 | 0.017842 | 35.584  |
| gnl UG Ssc#S40477070 | turquoise    | 91.733 | 82.11   | 0.382452 | 0.525194 | 1.704   |
| gnl UG Ssc#S40478259 | brown        | 264.42 | 128.121 | 0.993552 | 0.000621 | 162.468 |
| gnl UG Ssc#S40478547 | yellow       | 248.22 | 73.6791 | 0.95727  | 0.010535 | 22.266  |
| gnl UG Ssc#S40479246 | turquoise    | 1529.9 | 1529.39 | 0.994093 | 0.000545 | 20.458  |
| gnl UG Ssc#S40481010 | brown        | 263.16 | 116.099 | 0.971693 | 0.005693 | 33.694  |
| gnl UG Ssc#S40481152 | turquoise    | 1499.4 | 1498.83 | 0.990512 | 0.001108 | 6.588   |

|                      |               |        |         |          |          |         |
|----------------------|---------------|--------|---------|----------|----------|---------|
| gnl UG Ssc#S40481511 | yellow        | 245.81 | 72.3009 | 0.954022 | 0.011753 | 120.762 |
| gnl UG Ssc#S40482232 | yellow        | 124.71 | 58.6745 | 0.900406 | 0.037161 | 129.286 |
| gnl UG Ssc#S40482312 | turquoise     | 476.24 | 461.922 | 0.707001 | 0.181785 | 56.846  |
| gnl UG Ssc#S40482366 | turquoise     | 1447.9 | 1447.5  | 0.981431 | 0.003029 | 1.002   |
| gnl UG Ssc#S40482424 | turquoise     | 346    | 334.529 | 0.651879 | 0.233258 | 41.514  |
| gnl UG Ssc#S40482470 | tan           | 329.43 | 36.6797 | 0.971843 | 0.005648 | 21.732  |
| gnl UG Ssc#S40482579 | turquoise     | 300.45 | 289.774 | 0.630319 | 0.254325 | 79.13   |
| gnl UG Ssc#S40482663 | turquoise     | 1508.5 | 1508.12 | 0.991046 | 0.001016 | 4.972   |
| gnl UG Ssc#S40482883 | turquoise     | 1107.5 | 1105.98 | 0.922676 | 0.025509 | 47.644  |
| gnl UG Ssc#S40483013 | turquoise     | 1559.4 | 1558.99 | 0.998855 | 4.65E-05 | 8.982   |
| gnl UG Ssc#S40483020 | brown         | 243.65 | 125.516 | 0.990196 | 0.001164 | 9.46    |
| gnl UG Ssc#S40483452 | turquoise     | 1269.7 | 1268.56 | 0.950496 | 0.013123 | 1.212   |
| gnl UG Ssc#S40483502 | turquoise     | 1454.1 | 1453.43 | 0.982286 | 0.002823 | 9.59    |
| gnl UG Ssc#S40483512 | turquoise     | 1490.3 | 1489.78 | 0.988382 | 0.001501 | 3.476   |
| gnl UG Ssc#S40483811 | turquoise     | 1463.6 | 1463.05 | 0.982207 | 0.002841 | 3.978   |
| gnl UG Ssc#S40485684 | lightyellow   | 200.97 | 12.0732 | 0.802369 | 0.102283 | 13.692  |
| gnl UG Ssc#S40486793 | blue          | 302.55 | 118.963 | 0.934219 | 0.020052 | 3.638   |
| gnl UG Ssc#S40488267 | turquoise     | 281.16 | 277.584 | 0.6313   | 0.253356 | 5.492   |
| gnl UG Ssc#S40490801 | turquoise     | 1541.4 | 1540.97 | 0.994682 | 0.000465 | 3.464   |
| gnl UG Ssc#S40490912 | turquoise     | 1437.3 | 1436.86 | 0.977166 | 0.004128 | 3.634   |
| gnl UG Ssc#S40491599 | turquoise     | 1379.2 | 1378.39 | 0.967358 | 0.007045 | 3.916   |
| gnl UG Ssc#S40494040 | brown         | 258.44 | 129.13  | 0.996088 | 0.000294 | 11.696  |
| gnl UG Ssc#S40494112 | blue          | 325.05 | 148.78  | 0.985823 | 0.002022 | 29.972  |
| gnl UG Ssc#S40494421 | magenta       | 321.66 | 44.4227 | 0.993539 | 0.000623 | 43.39   |
| gnl UG Ssc#S40495537 | midnightblue  | 206.93 | 34.0433 | 0.981972 | 0.002898 | 132.254 |
| gnl UG Ssc#S40496270 | brown         | 219.21 | 124.691 | 0.99142  | 0.000953 | 46.564  |
| gnl UG Ssc#S40496968 | brown         | 108.66 | 50.9032 | 0.763423 | 0.133121 | 8.456   |
| gnl UG Ssc#S40499571 | turquoise     | 150.25 | 138.995 | 0.479099 | 0.414206 | 0.998   |
| gnl UG Ssc#S40500401 | midnightblue  | 245.1  | 36.625  | 0.996777 | 0.00022  | 29.784  |
| gnl UG Ssc#S40500672 | yellow        | 107.79 | 33.0219 | 0.731287 | 0.160301 | 466.84  |
| gnl UG Ssc#S40500952 | black         | 288.92 | 39.9427 | 0.961517 | 0.00901  | 107.52  |
| gnl UG Ssc#S40505966 | turquoise     | 1507   | 1506.37 | 0.991554 | 0.000931 | 21.592  |
| gnl UG Ssc#S40509095 | blue          | 318.98 | 139.794 | 0.971557 | 0.005734 | 7.144   |
| gnl UG Ssc#S40512983 | grey60        | 241.08 | 31.9559 | 0.989706 | 0.001252 | 13.77   |
| gnl UG Ssc#S40520406 | turquoise     | 1546.8 | 1546.37 | 0.995937 | 0.000311 | 18.762  |
| gnl UG Ssc#S40522263 | turquoise     | 1393   | 1392.11 | 0.974331 | 0.004918 | 108.814 |
| gnl UG Ssc#S40524341 | turquoise     | 208.7  | 149.665 | 0.385832 | 0.52122  | 18.882  |
| gnl UG Ssc#S40524913 | green         | 94.204 | 15.7309 | 0.657926 | 0.22744  | 100.444 |
| gnl UG Ssc#S40527077 | brown         | 245.52 | 129.8   | 0.99925  | 2.46E-05 | 10.638  |
| gnl UG Ssc#S40527391 | midnightblue  | 149.73 | 27.0386 | 0.932377 | 0.020894 | 28.236  |
| gnl UG Ssc#S40527867 | green         | 184.24 | 51.1362 | 0.985766 | 0.002034 | 6.222   |
| gnl UG Ssc#S40529248 | green         | 202.84 | 51.2767 | 0.976232 | 0.004383 | 182.3   |
| gnl UG Ssc#S40543017 | turquoise     | 1510.7 | 1510.32 | 0.989576 | 0.001276 | 3.364   |
| gnl UG Ssc#S40546869 | red           | 192.96 | 47.3713 | 0.976259 | 0.004376 | 35.772  |
| gnl UG Ssc#S40546896 | turquoise     | 580.85 | 576.58  | 0.76235  | 0.134005 | 0.236   |
| gnl UG Ssc#S40550337 | turquoise     | 1348.2 | 1347.35 | 0.964742 | 0.007905 | 67.512  |
| gnl UG Ssc#S40551411 | turquoise     | 1212.9 | 1211.69 | 0.938933 | 0.017948 | 24.136  |
| gnl UG Ssc#S40553929 | darkturquoise | 159.01 | 12.1635 | 0.898969 | 0.03796  | 73.27   |

|                      |            |        |         |          |          |         |
|----------------------|------------|--------|---------|----------|----------|---------|
| gnl UG Ssc#S40554875 | yellow     | 312.42 | 58.4113 | 0.874773 | 0.052185 | 43.798  |
| gnl UG Ssc#S40558823 | turquoise  | 1536   | 1535.44 | 0.995651 | 0.000344 | 5.24    |
| gnl UG Ssc#S40559315 | yellow     | 157.77 | 35.0979 | 0.735686 | 0.156495 | 8.228   |
| gnl UG Ssc#S40564541 | turquoise  | 669.74 | 664.513 | 0.804585 | 0.100603 | 18.048  |
| gnl UG Ssc#S40570043 | turquoise  | 1012.6 | 1010.58 | 0.891992 | 0.041913 | 29.098  |
| gnl UG Ssc#S40571777 | turquoise  | 1208.9 | 1207.75 | 0.934121 | 0.020096 | 9.814   |
| gnl UG Ssc#S40573713 | turquoise  | 1439.3 | 1438.56 | 0.979949 | 0.003398 | 12.98   |
| gnl UG Ssc#S40576057 | turquoise  | 1552.9 | 1552.49 | 0.996255 | 0.000275 | 5.112   |
| gnl UG Ssc#S40577963 | blue       | 260.44 | 125.781 | 0.947117 | 0.014482 | 16.19   |
| gnl UG Ssc#S40583885 | royalblue  | 237.9  | 23.0748 | 0.966999 | 0.007161 | 21.662  |
| gnl UG Ssc#S40584531 | grey       | 284.1  | 15.4295 | 0.923809 | 0.024955 | 25.876  |
| gnl UG Ssc#S40588179 | turquoise  | 1400.9 | 1400.48 | 0.973133 | 0.005265 | 36.762  |
| gnl UG Ssc#S40588301 | blue       | 244.13 | 112.516 | 0.922596 | 0.025549 | 665.198 |
| gnl UG Ssc#S40588989 | green      | 196.82 | 50.2578 | 0.966981 | 0.007167 | 17.716  |
| gnl UG Ssc#S40591094 | turquoise  | 1340.6 | 1339.57 | 0.965328 | 0.00771  | 37.134  |
| gnl UG Ssc#S41445227 | turquoise  | 1553.6 | 1553.18 | 0.996528 | 0.000245 | 0.52    |
| gnl UG Ssc#S41446009 | turquoise  | 597.95 | 591.68  | 0.777527 | 0.121674 | 32.426  |
| gnl UG Ssc#S41446582 | turquoise  | 1507.8 | 1507.19 | 0.991657 | 0.000914 | 49.088  |
| gnl UG Ssc#S41575095 | turquoise  | 720.93 | 717.938 | 0.815631 | 0.092358 | 17.872  |
| gnl UG Ssc#S41575462 | purple     | 167.31 | 28.044  | 0.92989  | 0.022049 | 77.28   |
| gnl UG Ssc#S41577006 | turquoise  | 1500.8 | 1500.39 | 0.989246 | 0.001337 | 4.664   |
| gnl UG Ssc#S41577334 | turquoise  | 347.04 | 323.462 | 0.616868 | 0.267713 | 9.438   |
| gnl UG Ssc#S41578369 | turquoise  | 1504.7 | 1504.15 | 0.99033  | 0.00114  | 2.006   |
| gnl UG Ssc#S43495814 | turquoise  | 1556.6 | 1556.26 | 0.997009 | 0.000196 | 4.152   |
| gnl UG Ssc#S46917266 | red        | 181.97 | 46.5952 | 0.972316 | 0.005506 | 2.452   |
| gnl UG Ssc#S5983468  | blue       | 202.01 | 75.5611 | 0.833929 | 0.079186 | 12.67   |
| gnl UG Ssc#S5984485  | darkred    | 68.291 | 7.02903 | 0.683914 | 0.202906 | 5.038   |
| gnl UG Ssc#S5985980  | turquoise  | 1539.2 | 1538.78 | 0.994424 | 0.000499 | 3.456   |
| gnl UG Ssc#S5991729  | turquoise  | 1322.5 | 1321.42 | 0.957995 | 0.010269 | 4.252   |
| gnl UG Ssc#S5992815  | yellow     | 256.15 | 80.416  | 0.977127 | 0.004138 | 28.488  |
| gnl UG Ssc#S5993568  | blue       | 286.86 | 123.354 | 0.942694 | 0.016326 | 6.196   |
| gnl UG Ssc#S5995726  | turquoise  | 1553.7 | 1553.28 | 0.997423 | 0.000157 | 9.342   |
| gnl UG Ssc#S5997273  | magenta    | 288.48 | 37.2472 | 0.955419 | 0.011224 | 6.304   |
| gnl UG Ssc#S5999567  | blue       | 274.99 | 113.618 | 0.924969 | 0.024392 | 14.356  |
| gnl UG Ssc#S5999689  | brown      | 282.99 | 106.894 | 0.94016  | 0.017413 | 4.786   |
| gnl UG Ssc#S5999899  | blue       | 305.02 | 148.666 | 0.985436 | 0.002105 | 27.488  |
| gnl UG Ssc#S6001862  | turquoise  | 1439.9 | 1439.25 | 0.97972  | 0.003456 | 0.938   |
| gnl UG Ssc#S6002926  | turquoise  | 317.84 | 293.435 | 0.596122 | 0.288714 | 2.41    |
| gnl UG Ssc#S6002981  | tan        | 245.38 | 34.4558 | 0.961268 | 0.009097 | 61.35   |
| gnl UG Ssc#S6003000  | turquoise  | 1518.8 | 1518.35 | 0.992219 | 0.000823 | 4.022   |
| gnl UG Ssc#S6006110  | turquoise  | 1389.8 | 1389.17 | 0.974617 | 0.004836 | 5.122   |
| gnl UG Ssc#S6007055  | yellow     | 297.59 | 72.4965 | 0.944403 | 0.015605 | 31.402  |
| gnl UG Ssc#S6008489  | lightgreen | 99.193 | 7.88784 | 0.430735 | 0.469036 | 12.308  |
| gnl UG Ssc#S6009554  | turquoise  | 1488.4 | 1487.97 | 0.986346 | 0.001911 | 4.656   |
| gnl UG Ssc#S6010002  | turquoise  | 1539   | 1538.54 | 0.995751 | 0.000332 | 2.802   |
| gnl UG Ssc#S6010568  | turquoise  | 1537.5 | 1537.06 | 0.994344 | 0.00051  | 3.24    |
| gnl UG Ssc#S6011299  | darkred    | 90.36  | 11.431  | 0.90578  | 0.034223 | 66.704  |
| gnl UG Ssc#S6013604  | brown      | 276.13 | 122.716 | 0.981836 | 0.002931 | 10.628  |

|                     |              |        |         |          |          |        |
|---------------------|--------------|--------|---------|----------|----------|--------|
| gnl UG Ssc#S6014656 | black        | 278.17 | 42.9004 | 0.993392 | 0.000644 | 42.28  |
| gnl UG Ssc#S6015201 | turquoise    | 1479.9 | 1479.26 | 0.986803 | 0.001816 | 10.62  |
| gnl UG Ssc#S6016211 | turquoise    | 1556.5 | 1556.1  | 0.9978   | 0.000124 | 5.442  |
| gnl UG Ssc#S6024301 | turquoise    | 1486.7 | 1486.14 | 0.988724 | 0.001435 | 5.51   |
| gnl UG Ssc#S6027323 | turquoise    | 1553.6 | 1553.18 | 0.996528 | 0.000245 | 0.378  |
| gnl UG Ssc#S6029367 | turquoise    | 1452.2 | 1451.6  | 0.982985 | 0.002658 | 18.978 |
| gnl UG Ssc#S6029610 | lightgreen   | 108.55 | 6.68126 | 0.417058 | 0.484808 | 53.362 |
| gnl UG Ssc#S6030301 | brown        | 246.52 | 129.003 | 0.997403 | 0.000159 | 3.246  |
| gnl UG Ssc#S6032057 | red          | 228.2  | 50.6379 | 0.989303 | 0.001326 | 3.036  |
| gnl UG Ssc#S6040545 | turquoise    | 1494.8 | 1494.27 | 0.989551 | 0.00128  | 6.682  |
| gnl UG Ssc#S6043533 | turquoise    | 1553.6 | 1553.18 | 0.996528 | 0.000245 | 0.472  |
| gnl UG Ssc#S6047303 | green        | 253.24 | 50.0809 | 0.957932 | 0.010292 | 74.176 |
| gnl UG Ssc#S6048180 | turquoise    | 1553.6 | 1553.18 | 0.996528 | 0.000245 | 0.52   |
| gnl UG Ssc#S6048273 | turquoise    | 1553.6 | 1553.18 | 0.996528 | 0.000245 | 0.614  |
| gnl UG Ssc#S6048306 | turquoise    | 1423.2 | 1422.65 | 0.978755 | 0.003705 | 4.038  |
| gnl UG Ssc#S6048475 | turquoise    | 324.2  | 302.819 | 0.607456 | 0.27719  | 15.898 |
| gnl UG Ssc#S6052686 | turquoise    | 1363.8 | 1363.19 | 0.966194 | 0.007423 | 4.446  |
| gnl UG Ssc#S6053423 | turquoise    | 1553.6 | 1553.18 | 0.996528 | 0.000245 | 0.284  |
| gnl UG Ssc#S6054625 | turquoise    | 1473.9 | 1473.32 | 0.985085 | 0.002182 | 7.396  |
| gnl UG Ssc#S6055465 | brown        | 198.44 | 105.316 | 0.946354 | 0.014795 | 6.576  |
| gnl UG Ssc#S6055548 | turquoise    | 1330.5 | 1329.58 | 0.963728 | 0.008247 | 11.1   |
| gnl UG Ssc#S6056024 | turquoise    | 1539.2 | 1538.66 | 0.996114 | 0.000291 | 13.406 |
| gnl UG Ssc#S6057322 | greenyellow  | 177.45 | 22.4513 | 0.986104 | 0.001962 | 8.732  |
| gnl UG Ssc#S6057912 | turquoise    | 1531.3 | 1530.95 | 0.992497 | 0.000779 | 4.01   |
| gnl UG Ssc#S6058133 | blue         | 344.9  | 135.106 | 0.964614 | 0.007948 | 11.388 |
| gnl UG Ssc#S6058262 | magenta      | 317.05 | 43.8924 | 0.991297 | 0.000973 | 10.516 |
| gnl UG Ssc#S6058884 | turquoise    | 306.53 | 284.803 | 0.586904 | 0.298177 | 23.678 |
| gnl UG Ssc#S6059254 | green        | 278.21 | 46.1874 | 0.939623 | 0.017647 | 57.516 |
| gnl UG Ssc#S6060797 | turquoise    | 1514.7 | 1514.33 | 0.991395 | 0.000957 | 6.146  |
| gnl UG Ssc#S6062152 | turquoise    | 1500.2 | 1499.52 | 0.990504 | 0.001109 | 2.01   |
| gnl UG Ssc#S6063101 | brown        | 249.34 | 126.946 | 0.992908 | 0.000716 | 10.162 |
| gnl UG Ssc#S6063275 | turquoise    | 1387.5 | 1386.62 | 0.970267 | 0.006127 | 10.096 |
| gnl UG Ssc#S6063458 | yellow       | 270.02 | 72.0451 | 0.938044 | 0.018339 | 71.956 |
| gnl UG Ssc#S6064423 | turquoise    | 1407.1 | 1406.54 | 0.972886 | 0.005338 | 16.772 |
| gnl UG Ssc#S6065016 | greenyellow  | 185.41 | 22.5096 | 0.971464 | 0.005762 | 10.262 |
| gnl UG Ssc#S6065178 | turquoise    | 1146   | 1145.09 | 0.923391 | 0.02516  | 6.458  |
| gnl UG Ssc#S6072016 | brown        | 223.43 | 124.436 | 0.989763 | 0.001241 | 9.148  |
| gnl UG Ssc#S6072575 | turquoise    | 1203   | 1201.58 | 0.941799 | 0.016707 | 17.584 |
| gnl UG Ssc#S6072690 | turquoise    | 1383.8 | 1383.3  | 0.96653  | 0.007314 | 4.948  |
| gnl UG Ssc#S6072825 | turquoise    | 1312.9 | 1311.77 | 0.960443 | 0.009388 | 60.81  |
| gnl UG Ssc#S6072888 | turquoise    | 958.41 | 956.025 | 0.890832 | 0.042583 | 8.142  |
| gnl UG Ssc#S6072982 | turquoise    | 1283.1 | 1282.26 | 0.9471   | 0.014489 | 10.258 |
| gnl UG Ssc#S6072986 | midnightblue | 235.4  | 35.415  | 0.98968  | 0.001257 | 30.484 |
| gnl UG Ssc#S6073003 | lightgreen   | 82.115 | 7.65972 | 0.504154 | 0.386429 | 23.632 |
| gnl UG Ssc#S6073264 | turquoise    | 1555.4 | 1555    | 0.997222 | 0.000176 | 16.82  |
| gnl UG Ssc#S6073842 | turquoise    | 1483.1 | 1482.61 | 0.986061 | 0.001971 | 1.956  |
| gnl UG Ssc#S6073975 | purple       | 188.11 | 33.0987 | 0.976554 | 0.004294 | 58.842 |
| gnl UG Ssc#S6074397 | turquoise    | 1489.5 | 1488.93 | 0.987027 | 0.00177  | 5.206  |

|                     |             |        |         |          |          |        |
|---------------------|-------------|--------|---------|----------|----------|--------|
| gnl UG Ssc#S6074613 | turquoise   | 951.05 | 949.36  | 0.87393  | 0.052706 | 8.984  |
| gnl UG Ssc#S6075066 | turquoise   | 160.14 | 113.253 | 0.335049 | 0.581524 | 77.348 |
| gnl UG Ssc#S6075552 | red         | 244.47 | 42.084  | 0.945668 | 0.015078 | 5.082  |
| gnl UG Ssc#S6075829 | navy        | 180.93 | 25.4645 | 0.931869 | 0.021128 | 61.414 |
| gnl UG Ssc#S6076069 | turquoise   | 1421   | 1420.37 | 0.97725  | 0.004105 | 1.906  |
| gnl UG Ssc#S6076809 | turquoise   | 1152.5 | 1151.25 | 0.929854 | 0.022066 | 35.704 |
| gnl UG Ssc#S6076838 | turquoise   | 1439.8 | 1439.07 | 0.978493 | 0.003774 | 17.7   |
| gnl UG Ssc#S6076883 | turquoise   | 1511   | 1510.57 | 0.990415 | 0.001125 | 2.748  |
| gnl UG Ssc#S6076898 | turquoise   | 619.27 | 613.935 | 0.789326 | 0.112338 | 64.932 |
| gnl UG Ssc#S6076952 | turquoise   | 1312   | 1310.7  | 0.958594 | 0.010051 | 10.206 |
| gnl UG Ssc#S6077016 | turquoise   | 1522.1 | 1521.67 | 0.993125 | 0.000684 | 3.018  |
| gnl UG Ssc#S6077174 | turquoise   | 1231.1 | 1230.25 | 0.938173 | 0.018282 | 4.846  |
| gnl UG Ssc#S6077334 | greenyellow | 77.805 | 5.21376 | -0.60897 | 0.275655 | 12.686 |
| gnl UG Ssc#S6077926 | turquoise   | 707.35 | 699.611 | 0.805513 | 0.099902 | 0.548  |
| gnl UG Ssc#S6081209 | turquoise   | 1551.9 | 1551.48 | 0.996164 | 0.000285 | 26.942 |
| gnl UG Ssc#S6081340 | greenyellow | 146.15 | 19.2432 | 0.938039 | 0.018341 | 5.694  |
| gnl UG Ssc#S6081526 | blue        | 278.17 | 136.298 | 0.965421 | 0.007679 | 41.128 |
| gnl UG Ssc#S6082353 | turquoise   | 1256   | 1254.65 | 0.950449 | 0.013142 | 6.266  |
| gnl UG Ssc#S6082550 | turquoise   | 1524.3 | 1523.7  | 0.993039 | 0.000696 | 15.826 |
| gnl UG Ssc#S6083832 | turquoise   | 1499.1 | 1498.69 | 0.988443 | 0.001489 | 4.768  |
| gnl UG Ssc#S6085378 | pink        | 281.47 | 38.1859 | 0.942468 | 0.016421 | 3.952  |
| gnl UG Ssc#S6085466 | pink        | 125.02 | 31.0666 | 0.898153 | 0.038416 | 9.926  |
| gnl UG Ssc#S6085531 | pink        | 221.68 | 46.5978 | 0.993165 | 0.000678 | 12.692 |
| gnl UG Ssc#S6085536 | yellow      | 262.71 | 74.4364 | 0.948503 | 0.013919 | 59.642 |
| gnl UG Ssc#S6085659 | brown       | 259.14 | 129.071 | 0.996112 | 0.000291 | 12.012 |
| gnl UG Ssc#S6085710 | yellow      | 179.48 | 76.1332 | 0.969299 | 0.006428 | 27.354 |
| gnl UG Ssc#S6085740 | green       | 254    | 50.4641 | 0.962187 | 0.008776 | 25.528 |
| gnl UG Ssc#S6089318 | turquoise   | 1515.5 | 1515.16 | 0.989695 | 0.001254 | 3.792  |
| gnl UG Ssc#S6665509 | navy        | 252.38 | 27.816  | 0.951182 | 0.012853 | 20.24  |
| gnl UG Ssc#S6666043 | turquoise   | 1386.1 | 1385.19 | 0.972653 | 0.005406 | 8.006  |
| gnl UG Ssc#S6666060 | magenta     | 280.44 | 33.4625 | 0.933413 | 0.020419 | 10.688 |
| gnl UG Ssc#S6666342 | navy        | 257.9  | 28.6725 | 0.958322 | 0.01015  | 22.29  |
| gnl UG Ssc#S6666554 | lightcyan   | 271.53 | 22.5224 | 0.954638 | 0.011518 | 19.592 |



Table S2-2 Attributes of genes in all modules of LDE postnatal.

| GeneSymbol                           | Module       | kTotal    | kWithin   | eigencorr | eigenpval  | meanExpr  |
|--------------------------------------|--------------|-----------|-----------|-----------|------------|-----------|
| gi 10304379 gb AF288822.1 AF288822.1 | black        | 781.52979 | 107.52506 | 0.9971711 | 0.00018054 | 50.062    |
| gi 106073315 gb DQ508264.1           | pink         | 824.19918 | 143.39123 | 0.9911071 | 0.00100535 | 6.784     |
| gi 108796051 ref NM_213912.2         | salmon       | 220.05951 | 71.241571 | 0.9798696 | 0.0034182  | 550.324   |
| gi 108796069 ref NM_001042375.1      | black        | 808.60078 | 96.252924 | 0.9733935 | 0.00518889 | 259.792   |
| gi 109639160 ref NM_001025222.2      | violet       | 43.14702  | 5.9621342 | -0.763034 | 0.13344124 | 1759.048  |
| gi 109639161 ref NM_001006593.2      | turquoise    | 373.18633 | 59.217211 | 0.0062775 | 0.99200725 | 4.792     |
| gi 112181313 ref NM_214438.2         | grey         | 538.23284 | 15.322396 | 0.9901666 | 0.00116882 | 294.976   |
| gi 11276047 gb AF319661.1            | red          | 913.65807 | 125.10588 | 0.9950036 | 0.00042363 | 2.626     |
| gi 113205497 ref NM_001044527.1      | yellow       | 150.35371 | 69.68024  | 0.8490825 | 0.0687637  | 14058.178 |
| gi 113205581 ref NM_001044532.1      | turquoise    | 184.81457 | 42.542882 | -0.442367 | 0.45571192 | 18.386    |
| gi 113205585 ref NM_001044535.1      | yellow       | 272.64186 | 123.21247 | 0.9791383 | 0.00360575 | 56.038    |
| gi 113205611 ref NM_001044541.1      | pink         | 567.90864 | 103.34024 | 0.9253224 | 0.02422108 | 25.746    |
| gi 113205623 ref NM_001044545.1      | white        | 1016.314  | 38.452198 | 0.9860314 | 0.00197766 | 12.58     |
| gi 113205635 ref NM_001044548.1      | tan          | 152.72499 | 47.837038 | 0.9969418 | 0.00020292 | 6.404     |
| gi 113205649 ref NM_001044550.1      | greenyellow  | 57.480542 | 12.982026 | 0.3396728 | 0.57598186 | 951.642   |
| gi 113205651 ref NM_001044553.1      | lightyellow  | 478.67518 | 64.075082 | 0.9988779 | 4.51E-05   | 30.714    |
| gi 113205653 ref NM_001044551.1      | navy         | 334.22517 | 20.315511 | 0.8065937 | 0.09908803 | 545.134   |
| gi 113205665 ref NM_001044554.1      | turquoise    | 176.89003 | 51.678805 | 0.5695071 | 0.31624921 | 98.064    |
| gi 113205675 ref NM_001044558.1      | lightyellow  | 662.91553 | 54.615389 | 0.9604463 | 0.00938688 | 8.938     |
| gi 113205689 ref NM_001044559.1      | orange       | 510.07289 | 14.60127  | 0.7071829 | 0.18162158 | 17.994    |
| gi 113205765 ref NM_001044576.1      | blue         | 711.86186 | 140.11187 | 0.9805355 | 0.00325033 | 22.344    |
| gi 113205779 ref NM_001044584.1      | magenta      | 398.53794 | 78.779532 | 0.9733092 | 0.00521351 | 33.084    |
| gi 113205811 ref NM_001044593.1      | white        | 832.1032  | 41.122124 | 0.9361511 | 0.01918053 | 325.586   |
| gi 113205825 ref NM_001044594.1      | magenta      | 167.36443 | 60.987984 | 0.9211055 | 0.02628431 | 173.672   |
| gi 113205835 ref NM_001044599.1      | midnightblue | 965.459   | 77.102599 | 0.9946174 | 0.00047366 | 18.506    |
| gi 113205859 ref NM_001044605.1      | darkmagenta  | 82.162091 | 8.5007178 | 0.9165536 | 0.02857154 | 84.228    |
| gi 113205873 ref NM_001044606.1      | darkgreen    | 219.50399 | 27.761186 | 0.8745254 | 0.05233837 | 422.486   |
| gi 113205877 ref NM_001044607.1      | tan          | 252.99227 | 37.356893 | 0.9011845 | 0.03673054 | 27.002    |
| gi 113205897 ref NM_001044613.1      | violet       | 964.24174 | 45.088618 | 0.9713101 | 0.00580829 | 15.934    |
| gi 113205905 ref NM_001044614.1      | turquoise    | 1017.9805 | 216.70743 | 0.9449713 | 0.01536741 | 172.024   |
| gi 113205907 ref NM_001044616.1      | green        | 846.40143 | 116.13899 | 0.9979441 | 0.00011187 | 80.066    |
| gi 113205909 ref NM_001044615.1      | royalblue    | 555.23752 | 61.481467 | 0.9901395 | 0.00117366 | 6.016     |
| gi 113205921 ref NM_001044618.1      | navy         | 55.915099 | 4.8016707 | -0.494954 | 0.39657543 | 43.464    |
| gi 113205929 ref NM_001044620.1      | royalblue    | 851.19013 | 51.426216 | 0.9473713 | 0.01437837 | 106.52    |
| gi 114326182 ref NM_001048072.1      | midnightblue | 971.10269 | 77.173527 | 0.9947663 | 0.00045416 | 35.736    |
| gi 114326213 ref NM_001048069.1      | darkred      | 43.152655 | 1.3347993 | -0.03924  | 0.95005135 | 20.44     |
| gi 115545542 dbj AK230657.1          | turquoise    | 990.65344 | 217.38321 | 0.9501349 | 0.01326641 | 64.296    |
| gi 115545552 dbj AK230667.1          | darkgrey     | 863.30913 | 50.969493 | 0.9854376 | 0.00210491 | 19.572    |
| gi 115545568 dbj AK230683.1          | grey60       | 296.40061 | 64.17835  | 0.9829243 | 0.00267169 | 19.478    |
| gi 115545600 dbj AK230715.1          | salmon       | 186.00121 | 57.274913 | 0.9365921 | 0.01898344 | 56.482    |
| gi 115545603 dbj AK230718.1          | yellow       | 299.72946 | 126.34284 | 0.9830424 | 0.00264407 | 2.622     |
| gi 115545609 dbj AK230724.1          | turquoise    | 939.01878 | 214.49577 | 0.9512281 | 0.0128347  | 18.306    |
| gi 115545622 dbj AK230737.1          | royalblue    | 757.60605 | 59.225752 | 0.979929  | 0.0034031  | 8.89      |
| gi 115545632 dbj AK230747.1          | turquoise    | 155.67202 | 49.558684 | 0.4099851 | 0.49300746 | 16.238    |
| gi 115545643 dbj AK230758.1          | green        | 927.6774  | 96.905381 | 0.9556177 | 0.01114899 | 22.462    |
| gi 115545669 dbj AK230784.1          | black        | 928.8554  | 96.246948 | 0.97207   | 0.00557971 | 90.554    |

|                             |               |           |           |           |            |         |
|-----------------------------|---------------|-----------|-----------|-----------|------------|---------|
| gi 115545681 dbj AK230796.1 | tan           | 142.07647 | 40.676478 | 0.9525994 | 0.01229979 | 22.922  |
| gi 115545725 dbj AK234158.1 | darkturquoise | 237.74895 | 45.81015  | 0.9914675 | 0.00094492 | 6.214   |
| gi 115545741 dbj AK234174.1 | blue          | 728.1961  | 115.90482 | 0.9356782 | 0.0193926  | 14.574  |
| gi 115545742 dbj AK234175.1 | paleturquoise | 182.11813 | 24.577239 | 0.9607481 | 0.00928006 | 29.414  |
| gi 115545749 dbj AK234182.1 | pink          | 982.1235  | 132.54613 | 0.9742714 | 0.00493485 | 10.164  |
| gi 115545756 dbj AK234189.1 | tan           | 71.698938 | 17.700543 | 0.6298095 | 0.25482872 | 7.954   |
| gi 115545757 dbj AK234190.1 | green         | 891.05192 | 114.93836 | 0.9958962 | 0.00031539 | 14.654  |
| gi 115545762 dbj AK234195.1 | blue          | 947.68607 | 140.76706 | 0.9795875 | 0.00349015 | 4.464   |
| gi 115545765 dbj AK234198.1 | navy          | 70.554522 | 9.414729  | -0.7455   | 0.14809816 | 38.49   |
| gi 115545770 dbj AK234203.1 | turquoise     | 184.66545 | 61.428111 | 0.5671875 | 0.31867927 | 8.586   |
| gi 115545783 dbj AK234216.1 | red           | 901.00883 | 126.87972 | 0.9980789 | 0.00010105 | 4.036   |
| gi 115545816 dbj AK234249.1 | brown         | 634.87948 | 131.2239  | 0.9931965 | 0.00067296 | 19.198  |
| gi 115545821 dbj AK234254.1 | lightcyan     | 194.65389 | 34.376393 | 0.846848  | 0.07027169 | 46.856  |
| gi 115545827 dbj AK234260.1 | midnightblue  | 730.25861 | 69.528167 | 0.9733939 | 0.00518877 | 8.862   |
| gi 115545844 dbj AK234277.1 | grey60        | 303.1603  | 67.689503 | 0.994859  | 0.00044215 | 1790.29 |
| gi 115545853 dbj AK234286.1 | blue          | 362.98553 | 87.239467 | 0.8741225 | 0.05258731 | 41.852  |
| gi 115545868 dbj AK234301.1 | darkgrey      | 950.32283 | 51.950497 | 0.9887536 | 0.00142928 | 9.692   |
| gi 115545894 dbj AK234327.1 | tan           | 136.30157 | 39.068058 | 0.9438861 | 0.0158216  | 38.03   |
| gi 115545904 dbj AK234337.1 | blue          | 582.49305 | 112.97569 | 0.9330477 | 0.02058601 | 13.85   |
| gi 115545921 dbj AK237362.1 | darkorange    | 118.44861 | 30.829499 | 0.9546205 | 0.0115251  | 12.902  |
| gi 115545926 dbj AK237367.1 | brown         | 637.97898 | 130.78303 | 0.9899955 | 0.00119942 | 12.678  |
| gi 115545943 dbj AK237384.1 | salmon        | 165.41784 | 63.75326  | 0.9577794 | 0.01034785 | 2.266   |
| gi 115545949 dbj AK237390.1 | darkgreen     | 110.60386 | 19.544333 | 0.7771117 | 0.12200675 | 54.098  |
| gi 115545955 dbj AK237396.1 | violet        | 984.77305 | 43.774279 | 0.9596332 | 0.0096766  | 7.578   |
| gi 115545973 dbj AK237414.1 | lightcyan     | 507.00319 | 58.869211 | 0.9857805 | 0.0020311  | 206.346 |
| gi 115545984 dbj AK237425.1 | yellow        | 239.18885 | 113.081   | 0.9602501 | 0.00945651 | 23.528  |
| gi 115545987 dbj AK237428.1 | lightgreen    | 318.36969 | 33.757977 | 0.8930095 | 0.04132912 | 11.812  |
| gi 115545992 dbj AK237433.1 | yellow        | 310.26963 | 127.88976 | 0.9879732 | 0.00158042 | 46.362  |
| gi 115546038 dbj AK237480.1 | brown         | 646.80119 | 130.7867  | 0.9894064 | 0.00130679 | 4.69    |
| gi 115546047 dbj AK237489.1 | navy          | 100.6716  | 11.893648 | 0.6454028 | 0.23953447 | 10.17   |
| gi 115546054 dbj AK237496.1 | purple        | 212.44848 | 46.287676 | 0.8759766 | 0.05144466 | 10.888  |
| gi 115546075 dbj AK237517.1 | purple        | 233.95098 | 44.741012 | 0.8696715 | 0.05536245 | 24.31   |
| gi 115546087 dbj AK237529.1 | turquoise     | 477.73416 | 120.96869 | 0.8201227 | 0.08906745 | 37.538  |
| gi 115546117 dbj AK240359.1 | brown         | 461.59614 | 94.693909 | 0.9163468 | 0.02867689 | 14.792  |
| gi 115546125 dbj AK230834.1 | blue          | 676.32084 | 136.62487 | 0.9761323 | 0.0044105  | 21.91   |
| gi 115546138 dbj AK240376.1 | red           | 994.74738 | 115.01611 | 0.9767856 | 0.00423109 | 61.678  |
| gi 115546153 dbj AK240391.1 | turquoise     | 907.61434 | 217.15521 | 0.9636361 | 0.0082786  | 8.424   |
| gi 115546160 dbj AK240398.1 | red           | 957.63475 | 123.36556 | 0.9917767 | 0.00089407 | 9.194   |
| gi 115546163 dbj AK240401.1 | salmon        | 223.96547 | 77.423277 | 0.9982883 | 8.50E-05   | 6.526   |
| gi 115546179 dbj AK240417.1 | salmon        | 190.52608 | 66.465093 | 0.9665957 | 0.00729203 | 22.01   |
| gi 115546190 dbj AK240428.1 | skyblue       | 467.24044 | 44.12717  | 0.9979418 | 0.00011206 | 4.698   |
| gi 115546193 dbj AK240431.1 | lightcyan     | 184.99736 | 35.389858 | 0.8528371 | 0.06625283 | 62.38   |
| gi 115546201 dbj AK240439.1 | lightyellow   | 368.61351 | 60.388182 | 0.9850428 | 0.00219096 | 19.886  |
| gi 115546215 dbj AK240453.1 | darkgreen     | 261.53851 | 40.493139 | 0.9783952 | 0.00379968 | 25.708  |
| gi 115546231 dbj AK240469.1 | black         | 724.66219 | 101.25788 | 0.9848088 | 0.00224249 | 3.702   |
| gi 115546234 dbj AK240472.1 | turquoise     | 449.43915 | 147.73792 | 0.8994058 | 0.03771629 | 9.184   |
| gi 115546241 dbj AK240479.1 | grey60        | 296.12371 | 62.877015 | 0.9784712 | 0.00377968 | 383.234 |
| gi 115546292 dbj AK240530.1 | turquoise     | 270.4829  | 98.050924 | 0.687239  | 0.19982413 | 11.092  |

|                             |              |           |           |           |            |         |
|-----------------------------|--------------|-----------|-----------|-----------|------------|---------|
| gi 115546304 dbj AK240542.1 | darkgrey     | 686.16623 | 39.161297 | 0.9324194 | 0.02087446 | 25.588  |
| gi 115546313 dbj AK240551.1 | darkred      | 208.16291 | 44.67118  | 0.9811746 | 0.00309185 | 7.124   |
| gi 115546324 dbj AK230843.1 | turquoise    | 958.1072  | 212.37857 | 0.9481362 | 0.01406769 | 67.886  |
| gi 115546331 dbj AK230850.1 | royalblue    | 592.40451 | 62.462036 | 0.9935709 | 0.00061822 | 48.964  |
| gi 115546334 dbj AK230853.1 | darkorange   | 141.0497  | 34.923504 | 0.9938199 | 0.00058267 | 53.898  |
| gi 115546337 dbj AK230856.1 | brown        | 860.86239 | 120.47563 | 0.9649436 | 0.00783769 | 9.246   |
| gi 115546371 dbj AK230890.1 | yellow       | 217.75383 | 81.86102  | 0.8835561 | 0.04685696 | 43.832  |
| gi 115546374 dbj AK230893.1 | blue         | 695.44537 | 142.83068 | 0.9865565 | 0.00186735 | 9.226   |
| gi 115546403 dbj AK230922.1 | red          | 691.43369 | 104.57572 | 0.9586906 | 0.01001608 | 4.176   |
| gi 115546406 dbj AK230925.1 | greenyellow  | 168.2292  | 36.688939 | 0.9367437 | 0.01891582 | 15.88   |
| gi 115546428 dbj AK230947.1 | darkred      | 137.27511 | 32.218164 | 0.894242  | 0.04062481 | 6       |
| gi 115546438 dbj AK230957.1 | brown        | 373.5783  | 65.582105 | 0.8467106 | 0.07036478 | 71.408  |
| gi 115546446 dbj AK230965.1 | turquoise    | 233.82097 | 90.902246 | 0.7367965 | 0.15553738 | 48.586  |
| gi 115546452 dbj AK230971.1 | black        | 659.18269 | 98.804635 | 0.9792114 | 0.00358684 | 11.158  |
| gi 115546465 dbj AK230984.1 | magenta      | 365.16186 | 83.277461 | 0.9880901 | 0.00155746 | 66.902  |
| gi 115546477 dbj AK230996.1 | turquoise    | 185.0763  | 72.569949 | 0.6082714 | 0.27636468 | 25.204  |
| gi 115546487 dbj AK231006.1 | salmon       | 227.89498 | 76.896805 | 0.9964652 | 0.00025215 | 13.18   |
| gi 115546495 dbj AK231014.1 | midnightblue | 892.09164 | 75.347843 | 0.9901546 | 0.00117096 | 3.58    |
| gi 115546548 dbj AK234386.1 | blue         | 391.58717 | 90.253028 | 0.883185  | 0.04707839 | 16.108  |
| gi 115546569 dbj AK234407.1 | white        | 274.49058 | 16.603383 | -0.557773 | 0.32858983 | 9.722   |
| gi 115546576 dbj AK234414.1 | lightyellow  | 531.9984  | 61.216026 | 0.9875728 | 0.00165991 | 48.17   |
| gi 115546586 dbj AK234424.1 | navy         | 83.428461 | 7.6488472 | -0.928895 | 0.02251612 | 175.52  |
| gi 115546610 dbj AK234448.1 | yellow       | 220.21979 | 73.666654 | 0.8548278 | 0.06493345 | 22.672  |
| gi 115546623 dbj AK234461.1 | brown        | 695.44263 | 136.32816 | 0.9984617 | 7.24E-05   | 84.236  |
| gi 115546625 dbj AK234463.1 | darkgrey     | 881.36576 | 48.237538 | 0.9741307 | 0.00497528 | 2.424   |
| gi 115546628 dbj AK234466.1 | white        | 809.14679 | 44.358674 | 0.9502351 | 0.01322665 | 3.76    |
| gi 115546638 dbj AK234476.1 | turquoise    | 311.17383 | 114.98564 | 0.7412011 | 0.15175913 | 9.192   |
| gi 115546656 dbj AK234494.1 | turquoise    | 210.70889 | 79.060669 | 0.5841978 | 0.30097062 | 25.784  |
| gi 115546680 dbj AK234518.1 | turquoise    | 1010.6358 | 198.24435 | 0.909776  | 0.03208856 | 70.592  |
| gi 115546695 dbj AK234533.1 | skyblue      | 569.3791  | 39.61232  | 0.9731974 | 0.0052462  | 64.332  |
| gi 115546696 dbj AK234534.1 | darkgrey     | 826.44417 | 51.242291 | 0.986597  | 0.00185893 | 25.928  |
| gi 115546712 dbj AK237558.1 | orange       | 106.29193 | 23.629062 | 0.8507658 | 0.06763438 | 172.356 |
| gi 115546753 dbj AK237599.1 | turquoise    | 352.82481 | 61.615869 | -0.0328   | 0.95824501 | 28.9    |
| gi 115546780 dbj AK237626.1 | navy         | 748.81425 | 17.021828 | -0.148673 | 0.81140389 | 9.702   |
| gi 115546792 dbj AK237638.1 | turquoise    | 341.76033 | 110.37463 | 0.7783749 | 0.12099576 | 11.918  |
| gi 115546833 dbj AK237679.1 | lightcyan    | 546.36838 | 53.451399 | 0.9558732 | 0.0110533  | 14.886  |
| gi 115546838 dbj AK237684.1 | blue         | 919.08547 | 149.86229 | 0.9941156 | 0.00054138 | 11.368  |
| gi 115546849 dbj AK237695.1 | turquoise    | 240.48682 | 94.380353 | 0.683648  | 0.20315324 | 19.862  |
| gi 115546853 dbj AK237699.1 | blue         | 312.49155 | 67.262666 | 0.8191547 | 0.08977349 | 4.73    |
| gi 115546855 dbj AK237701.1 | black        | 882.70032 | 104.50818 | 0.9904208 | 0.00112384 | 5.512   |
| gi 115546868 dbj AK237714.1 | green        | 949.46286 | 110.1111  | 0.9833484 | 0.00257294 | 16.85   |
| gi 115546917 dbj AK240563.1 | tan          | 330.94304 | 33.279754 | 0.874477  | 0.05236822 | 23.84   |
| gi 115546929 dbj AK240575.1 | turquoise    | 174.21588 | 53.304572 | 0.4304057 | 0.46941457 | 25.672  |
| gi 115546934 dbj AK240580.1 | darkred      | 184.7832  | 42.953638 | 0.9736801 | 0.0051055  | 8.318   |
| gi 115546953 dbj AK240599.1 | red          | 917.55432 | 124.98127 | 0.9948141 | 0.00044795 | 11.08   |
| gi 115546978 dbj AK231033.1 | tan          | 153.8875  | 47.460475 | 0.9926424 | 0.00075676 | 28.572  |
| gi 115547033 dbj AK231088.1 | turquoise    | 861.34298 | 202.25917 | 0.9327838 | 0.02070697 | 24.702  |
| gi 115547065 dbj AK231120.1 | turquoise    | 169.86096 | 40.731797 | -0.360898 | 0.55067036 | 99.518  |

|                             |               |           |           |           |            |         |
|-----------------------------|---------------|-----------|-----------|-----------|------------|---------|
| gi 115547094 dbj AK231149.1 | turquoise     | 965.00757 | 209.96432 | 0.9366422 | 0.01896107 | 11.596  |
| gi 115547117 dbj AK231172.1 | salmon        | 241.58119 | 73.367635 | 0.9858696 | 0.00201207 | 49.874  |
| gi 115547124 dbj AK231179.1 | black         | 694.80488 | 100.28541 | 0.9828777 | 0.00268262 | 12.568  |
| gi 115547136 dbj AK231191.1 | brown         | 687.89797 | 129.69049 | 0.9911976 | 0.00099007 | 8.186   |
| gi 115547142 dbj AK231197.1 | purple        | 231.63217 | 49.806984 | 0.8902526 | 0.04291839 | 426.966 |
| gi 115547167 dbj AK231222.1 | white         | 733.66157 | 41.953524 | 0.9175074 | 0.0280872  | 4.47    |
| gi 115547176 dbj AK234549.1 | turquoise     | 240.05238 | 53.170674 | -0.25909  | 0.67384577 | 10.75   |
| gi 115547198 dbj AK234571.1 | darkred       | 164.72547 | 38.962617 | 0.9457875 | 0.01502865 | 141.406 |
| gi 115547204 dbj AK234577.1 | turquoise     | 732.72945 | 155.5075  | 0.8419725 | 0.07359709 | 25.618  |
| gi 115547230 dbj AK234603.1 | brown         | 423.3036  | 89.705124 | 0.9139831 | 0.02988995 | 29.552  |
| gi 115547231 dbj AK234604.1 | brown         | 712.15792 | 136.05725 | 0.9985565 | 6.58E-05   | 12.458  |
| gi 115547242 dbj AK234615.1 | salmon        | 196.34101 | 72.028898 | 0.9836707 | 0.00249873 | 6.428   |
| gi 115547251 dbj AK234624.1 | yellow        | 224.47031 | 76.858221 | 0.8769221 | 0.05086505 | 18.496  |
| gi 115547260 dbj AK234633.1 | darkturquoise | 98.46622  | 17.481082 | 0.7816602 | 0.11837824 | 78.402  |
| gi 115547282 dbj AK234655.1 | darkorange    | 208.76194 | 24.982238 | 0.9209128 | 0.0263799  | 242.45  |
| gi 115547298 dbj AK234671.1 | pink          | 941.81911 | 148.27333 | 0.9976724 | 0.00013476 | 17.092  |
| gi 115547309 dbj AK234682.1 | red           | 956.98073 | 121.00537 | 0.9876757 | 0.00163936 | 0.972   |
| gi 115547320 dbj AK234693.1 | pink          | 1006.2733 | 128.13705 | 0.9670355 | 0.00714898 | 74.428  |
| gi 115547329 dbj AK234702.1 | pink          | 885.46441 | 148.79423 | 0.9985561 | 6.58E-05   | 4.336   |
| gi 115547340 dbj AK234713.1 | midnightblue  | 956.81187 | 73.869123 | 0.9854316 | 0.00210621 | 25.004  |
| gi 115547352 dbj AK234725.1 | turquoise     | 429.60205 | 112.73144 | 0.7341641 | 0.15780828 | 10.472  |
| gi 115547361 dbj AK234734.1 | green         | 675.92367 | 98.500157 | 0.9633288 | 0.00838336 | 60.448  |
| gi 115547381 dbj AK237762.1 | blue          | 809.65312 | 151.67253 | 0.9987193 | 5.50E-05   | 22.28   |
| gi 115547397 dbj AK237778.1 | pink          | 812.08636 | 144.97044 | 0.993314  | 0.00065561 | 7.588   |
| gi 115547403 dbj AK237784.1 | turquoise     | 509.47829 | 159.45749 | 0.9016381 | 0.03648049 | 8.746   |
| gi 115547414 dbj AK237795.1 | turquoise     | 138.60537 | 51.070694 | 0.5277542 | 0.360689   | 61.786  |
| gi 115547436 dbj AK237818.1 | violet        | 115.74814 | 5.3486216 | -0.576197 | 0.30926744 | 18.896  |
| gi 115547445 dbj AK237827.1 | royalblue     | 694.85224 | 56.743232 | 0.9727886 | 0.00536635 | 67.862  |
| gi 115547450 dbj AK237832.1 | salmon        | 210.42726 | 57.332929 | 0.9316416 | 0.02123333 | 3.486   |
| gi 115547470 dbj AK237852.1 | white         | 901.55566 | 47.113774 | 0.9760846 | 0.00442372 | 4.858   |
| gi 115547485 dbj AK237867.1 | purple        | 182.65811 | 42.505826 | 0.8628417 | 0.0597068  | 52.864  |
| gi 115547488 dbj AK237870.1 | turquoise     | 779.21787 | 192.62506 | 0.9367797 | 0.0188998  | 30.194  |
| gi 115547522 dbj AK237904.1 | violet        | 53.9654   | 8.6722365 | -0.846109 | 0.07077269 | 82.688  |
| gi 115547541 dbj AK237923.1 | turquoise     | 392.52736 | 131.64488 | 0.830513  | 0.08159755 | 1245.13 |
| gi 115547575 dbj AK231233.1 | skyblue       | 566.6924  | 43.084276 | 0.9912936 | 0.00097392 | 28.652  |
| gi 115547631 dbj AK231289.1 | grey60        | 314.19318 | 68.764166 | 0.9978174 | 0.00012236 | 6.634   |
| gi 115547636 dbj AK231294.1 | green         | 500.92988 | 62.329656 | 0.8654556 | 0.05803199 | 27.126  |
| gi 115547667 dbj AK231325.1 | blue          | 954.1155  | 135.49776 | 0.9700779 | 0.00618533 | 5.398   |
| gi 115547679 dbj AK231337.1 | darkred       | 181.08424 | 37.432567 | 0.9247751 | 0.0244858  | 33.212  |
| gi 115547688 dbj AK231346.1 | turquoise     | 315.99337 | 116.29007 | 0.8177364 | 0.09081109 | 2.528   |
| gi 115547715 dbj AK231373.1 | red           | 864.47075 | 125.78058 | 0.9963496 | 0.00026461 | 4.38    |
| gi 115547725 dbj AK231383.1 | lightgreen    | 200.53444 | 24.622741 | 0.7405594 | 0.15230795 | 1.796   |
| gi 115547754 dbj AK231412.1 | salmon        | 162.10628 | 61.946525 | 0.9520704 | 0.01250523 | 21.722  |
| gi 115547780 dbj AK234756.1 | darkred       | 206.78642 | 40.685702 | 0.9464369 | 0.01476086 | 4.552   |
| gi 115547803 dbj AK234779.1 | turquoise     | 934.63163 | 201.93232 | 0.9204463 | 0.02661172 | 39.108  |
| gi 115547837 dbj AK234813.1 | pink          | 850.7406  | 147.59653 | 0.9969478 | 0.00020233 | 3.17    |
| gi 115547849 dbj AK234825.1 | turquoise     | 204.07521 | 83.049354 | 0.671306  | 0.2147115  | 20.252  |
| gi 115547856 dbj AK234832.1 | yellow        | 292.23252 | 124.2921  | 0.9790574 | 0.0036267  | 14.936  |

|                             |               |           |           |           |            |         |
|-----------------------------|---------------|-----------|-----------|-----------|------------|---------|
| gi 115547861 dbj AK234837.1 | blue          | 675.40199 | 84.039885 | 0.8661519 | 0.05758835 | 22.73   |
| gi 115547869 dbj AK234845.1 | darkturquoise | 220.2516  | 46.571994 | 0.9958156 | 0.00032472 | 31.752  |
| gi 115547882 dbj AK234858.1 | tan           | 235.47206 | 39.489027 | 0.9152179 | 0.0292542  | 27.976  |
| gi 115547885 dbj AK234861.1 | brown         | 167.91349 | 21.498589 | 0.603741  | 0.2809531  | 19.26   |
| gi 115547886 dbj AK234862.1 | turquoise     | 319.52666 | 100.48316 | 0.7436805 | 0.14964432 | 11.036  |
| gi 115547910 dbj AK234886.1 | navy          | 985.23867 | 18.014461 | -0.023754 | 0.96975892 | 14.214  |
| gi 115547932 dbj AK234909.1 | magenta       | 327.395   | 79.231913 | 0.9790986 | 0.00361601 | 38.876  |
| gi 115547946 dbj AK234923.1 | brown         | 464.63215 | 92.139214 | 0.9189576 | 0.02735592 | 23.65   |
| gi 115547985 dbj AK237969.1 | turquoise     | 734.5487  | 204.24652 | 0.963837  | 0.00821031 | 24.518  |
| gi 115548000 dbj AK237984.1 | darkgreen     | 244.63539 | 43.616012 | 0.9972929 | 0.00016901 | 38.892  |
| gi 115548002 dbj AK237986.1 | brown         | 585.33056 | 121.94148 | 0.9785324 | 0.00376361 | 171.864 |
| gi 115548018 dbj AK238002.1 | blue          | 368.83237 | 73.520506 | 0.8400815 | 0.07489962 | 11.468  |
| gi 115548040 dbj AK238024.1 | violet        | 860.91887 | 46.4743   | 0.9948606 | 0.00044195 | 9.104   |
| gi 115548067 dbj AK238051.1 | salmon        | 212.11877 | 69.175372 | 0.9739991 | 0.00501321 | 3.396   |
| gi 115548072 dbj AK238056.1 | turquoise     | 324.67404 | 61.071423 | -0.078577 | 0.90005549 | 31.344  |
| gi 115548078 dbj AK238062.1 | darkorange    | 218.81994 | 11.847756 | 0.7233809 | 0.16720947 | 4.382   |
| gi 115548084 dbj AK238068.1 | red           | 478.32021 | 79.204586 | 0.9029781 | 0.035745   | 7.648   |
| gi 115548129 dbj AK238113.1 | red           | 931.76331 | 126.71449 | 0.9976172 | 0.00013957 | 3.212   |
| gi 115548136 dbj AK238120.1 | paleturquoise | 175.92358 | 24.136773 | 0.9444888 | 0.01556881 | 6.362   |
| gi 115548176 dbj AK234948.1 | lightyellow   | 574.40311 | 59.963591 | 0.9824641 | 0.00278023 | 143.722 |
| gi 115548199 dbj AK231509.1 | yellow        | 255.58259 | 95.957489 | 0.9164941 | 0.02860182 | 2.134   |
| gi 115548219 dbj AK231529.1 | darkturquoise | 133.47867 | 38.891689 | 0.9546875 | 0.0114997  | 34.56   |
| gi 115548236 dbj AK231450.1 | skyblue       | 479.33463 | 44.382447 | 0.999099  | 3.25E-05   | 7.714   |
| gi 115548239 dbj AK231453.1 | purple        | 293.43219 | 77.8571   | 0.9924903 | 0.00078033 | 7.62    |
| gi 115548250 dbj AK231464.1 | darkorange    | 160.1326  | 33.722424 | 0.9899511 | 0.00120741 | 2.28    |
| gi 115548260 dbj AK231474.1 | darkred       | 212.93198 | 41.355547 | 0.9555232 | 0.01118447 | 6.53    |
| gi 115548298 dbj AK234955.1 | yellow        | 313.31823 | 129.04798 | 0.9889041 | 0.00140072 | 18.378  |
| gi 115548312 dbj AK234969.1 | red           | 893.18817 | 124.73169 | 0.9945263 | 0.00048574 | 5.554   |
| gi 115548314 dbj AK234971.1 | turquoise     | 319.23425 | 60.757023 | -0.105162 | 0.86635088 | 15.382  |
| gi 115548316 dbj AK234973.1 | brown         | 135.64657 | 20.953627 | 0.5641679 | 0.32184968 | 27.768  |
| gi 115548319 dbj AK231543.1 | darkmagenta   | 124.56805 | 9.6777558 | 0.9225106 | 0.0255908  | 37.02   |
| gi 115548323 dbj AK231696.1 | darkred       | 182.71535 | 38.243914 | 0.9303018 | 0.02185612 | 5.276   |
| gi 115548328 dbj AK231701.1 | green         | 964.35845 | 106.41499 | 0.9751526 | 0.00468414 | 5.422   |
| gi 115548334 dbj AK231707.1 | turquoise     | 704.58848 | 174.08603 | 0.9072533 | 0.03343071 | 30.756  |
| gi 115548360 dbj AK231733.1 | blue          | 917.99076 | 130.13706 | 0.9599909 | 0.00954879 | 47.492  |
| gi 115548373 dbj AK234990.1 | red           | 758.83614 | 116.28908 | 0.9804194 | 0.00327939 | 1.954   |
| gi 115548383 dbj AK235000.1 | turquoise     | 870.88718 | 203.42942 | 0.9342765 | 0.02002564 | 14.194  |
| gi 115548388 dbj AK235005.1 | lightcyan     | 619.88284 | 46.549259 | 0.9124757 | 0.03067196 | 31.48   |
| gi 115548389 dbj AK235006.1 | brown         | 772.68315 | 132.44867 | 0.9877241 | 0.00162972 | 13.966  |
| gi 115548394 dbj AK235011.1 | blue          | 794.15315 | 132.0859  | 0.9653698 | 0.0076957  | 18.008  |
| gi 115548406 dbj AK235023.1 | red           | 945.23832 | 124.87238 | 0.9943867 | 0.00050442 | 1.358   |
| gi 115548409 dbj AK235026.1 | brown         | 150.45337 | 19.8866   | 0.527977  | 0.36044812 | 15.792  |
| gi 115548413 dbj AK235030.1 | darkmagenta   | 275.68302 | 5.161233  | -0.786895 | 0.1142433  | 12.144  |
| gi 115548441 dbj AK235058.1 | orange        | 324.55326 | 36.181135 | 0.9897463 | 0.00124448 | 43.698  |
| gi 115548454 dbj AK235071.1 | lightgreen    | 402.28732 | 39.521986 | 0.9416187 | 0.01678435 | 5.144   |
| gi 115548459 dbj AK235076.1 | red           | 860.27555 | 124.4075  | 0.9940912 | 0.00054475 | 3.702   |
| gi 115548467 dbj AK235084.1 | turquoise     | 343.26411 | 108.57626 | 0.7416417 | 0.15138271 | 105.174 |
| gi 115548500 dbj AK235117.1 | blue          | 568.94354 | 102.33673 | 0.9085462 | 0.03274066 | 67.994  |

|                             |               |           |           |           |            |         |
|-----------------------------|---------------|-----------|-----------|-----------|------------|---------|
| gi 115548514 dbj AK235131.1 | black         | 912.45622 | 103.98515 | 0.989402  | 0.00130762 | 40.874  |
| gi 115548519 dbj AK235136.1 | grey60        | 314.80173 | 69.237177 | 0.9995098 | 1.30E-05   | 30.196  |
| gi 115548520 dbj AK235137.1 | turquoise     | 286.64289 | 103.61897 | 0.694042  | 0.19355991 | 36.294  |
| gi 115548526 dbj AK235143.1 | turquoise     | 558.19245 | 173.65392 | 0.9247881 | 0.02447948 | 20.974  |
| gi 115548564 dbj AK231548.1 | yellow        | 173.39436 | 80.015319 | 0.8817118 | 0.04796078 | 145.702 |
| gi 115548572 dbj AK231556.1 | midnightblue  | 804.74192 | 74.363759 | 0.9874442 | 0.0016857  | 34.466  |
| gi 115548574 dbj AK231558.1 | turquoise     | 197.13269 | 70.385347 | 0.6112601 | 0.27334863 | 654.922 |
| gi 115548620 dbj AK231604.1 | navy          | 124.60951 | 35.297913 | 0.9588067 | 0.00997407 | 6.292   |
| gi 115548658 dbj AK231642.1 | brown         | 800.97951 | 124.89943 | 0.9735354 | 0.00514754 | 79.756  |
| gi 115548698 dbj AK231683.1 | white         | 213.95273 | 15.526975 | -0.724678 | 0.16607036 | 114.27  |
| gi 115548706 dbj AK231691.1 | brown         | 650.94478 | 131.56682 | 0.9900594 | 0.00118797 | 48.782  |
| gi 115548717 dbj AK231783.1 | royalblue     | 441.60992 | 55.055825 | 0.9647237 | 0.00791129 | 352.914 |
| gi 115548727 dbj AK231793.1 | royalblue     | 360.4268  | 46.209979 | 0.9247981 | 0.02447465 | 8.67    |
| gi 115548749 dbj AK231815.1 | pink          | 850.58289 | 148.09877 | 0.9976633 | 0.00013555 | 3.666   |
| gi 115548797 dbj AK231755.1 | turquoise     | 375.38579 | 92.234271 | 0.7044158 | 0.18411745 | 31.79   |
| gi 115548800 dbj AK231758.1 | greenyellow   | 85.08938  | 14.371134 | 0.4723904 | 0.42171959 | 29.016  |
| gi 115548801 dbj AK231759.1 | yellow        | 198.26869 | 90.308823 | 0.907552  | 0.03327089 | 57.926  |
| gi 115548802 dbj AK231760.1 | lightgreen    | 537.20814 | 33.332087 | 0.8626623 | 0.05982231 | 6.364   |
| gi 115548807 dbj AK231765.1 | yellow        | 149.44932 | 62.801265 | 0.8230331 | 0.08695486 | 33.966  |
| gi 115548828 dbj AK231943.1 | yellow        | 278.98069 | 130.60874 | 0.9927755 | 0.00073634 | 22.928  |
| gi 115548831 dbj AK231946.1 | blue          | 620.01121 | 88.998436 | 0.8843537 | 0.04638215 | 14.46   |
| gi 115548849 dbj AK235252.1 | blue          | 509.96054 | 91.505064 | 0.884307  | 0.04640987 | 14.144  |
| gi 115548852 dbj AK235255.1 | darkturquoise | 178.69853 | 41.238152 | 0.9664571 | 0.00733733 | 62.236  |
| gi 115548861 dbj AK235264.1 | blue          | 817.77129 | 151.6116  | 0.9981763 | 9.35E-05   | 9.648   |
| gi 115548869 dbj AK235272.1 | paleturquoise | 177.97931 | 23.427078 | 0.9392895 | 0.01779241 | 3.844   |
| gi 115548882 dbj AK235285.1 | brown         | 299.5347  | 41.163192 | 0.7366916 | 0.15562772 | 71.254  |
| gi 115548922 dbj AK235325.1 | midnightblue  | 893.48596 | 76.404608 | 0.9930992 | 0.00068743 | 144.162 |
| gi 115548932 dbj AK235335.1 | magenta       | 309.86951 | 86.33648  | 0.9989808 | 3.91E-05   | 22.164  |
| gi 115548933 dbj AK235336.1 | blue          | 885.07598 | 142.40215 | 0.9825488 | 0.00276013 | 10.612  |
| gi 115548942 dbj AK235345.1 | yellow        | 253.40841 | 114.99263 | 0.9639104 | 0.00818542 | 8.196   |
| gi 115548954 dbj AK235357.1 | turquoise     | 391.6864  | 68.296256 | 0.5981388 | 0.28665444 | 7.896   |
| gi 115548955 dbj AK235358.1 | darkmagenta   | 71.667896 | 6.4582736 | 0.9118747 | 0.03098552 | 56.24   |
| gi 115548956 dbj AK235359.1 | turquoise     | 1015.2382 | 215.19746 | 0.9409617 | 0.01706676 | 8.212   |
| gi 115548992 dbj AK238181.1 | navy          | 175.91141 | 40.603423 | 0.9786528 | 0.00373207 | 15.188  |
| gi 115549006 dbj AK238195.1 | pink          | 894.62975 | 149.62591 | 0.9996875 | 6.63E-06   | 1.668   |
| gi 115549015 dbj AK238204.1 | turquoise     | 275.40566 | 103.01962 | 0.7326402 | 0.15912726 | 3.116   |
| gi 115549057 dbj AK238246.1 | midnightblue  | 843.90306 | 76.158915 | 0.9921465 | 0.00083449 | 14.806  |
| gi 115549078 dbj AK238267.1 | darkmagenta   | 72.795114 | 8.8541451 | 0.945585  | 0.01511246 | 41.586  |
| gi 115549145 dbj AK238334.1 | midnightblue  | 916.32396 | 74.621169 | 0.988112  | 0.00155317 | 5.798   |
| gi 115549177 dbj AK231853.1 | brown         | 188.87035 | 30.521123 | 0.6483216 | 0.23670037 | 16.826  |
| gi 115549179 dbj AK231855.1 | red           | 893.15251 | 126.53179 | 0.9975624 | 0.00014442 | 20.452  |
| gi 115549199 dbj AK231875.1 | navy          | 79.081388 | 36.442145 | 0.9348258 | 0.0197768  | 1.798   |
| gi 115549229 dbj AK231905.1 | yellow        | 279.90546 | 123.3362  | 0.9780571 | 0.00388903 | 49.066  |
| gi 115549239 dbj AK231915.1 | midnightblue  | 922.9414  | 76.303015 | 0.9925998 | 0.00076334 | 42.672  |
| gi 115549243 dbj AK231919.1 | orange        | 228.40005 | 14.902841 | 0.7379663 | 0.15453128 | 25.536  |
| gi 115549251 dbj AK231927.1 | red           | 917.20999 | 127.28631 | 0.9985982 | 6.30E-05   | 3.082   |
| gi 115549258 dbj AK235178.1 | turquoise     | 933.8651  | 204.77151 | 0.9309569 | 0.02155088 | 10.506  |
| gi 115549275 dbj AK235196.1 | turquoise     | 881.7846  | 214.26461 | 0.965135  | 0.00777382 | 21.364  |

|                             |               |           |           |           |            |         |
|-----------------------------|---------------|-----------|-----------|-----------|------------|---------|
| gi 115549311 dbj AK235232.1 | salmon        | 191.42077 | 67.680023 | 0.9705801 | 0.00603074 | 26.928  |
| gi 115549313 dbj AK235234.1 | midnightblue  | 624.13906 | 63.701406 | 0.9547705 | 0.01146827 | 112.428 |
| gi 115549331 dbj AK232109.1 | darkgreen     | 102.58573 | 12.038272 | 0.645985  | 0.23896839 | 376.264 |
| gi 115549349 dbj AK232127.1 | lightcyan     | 406.53928 | 55.005431 | 0.9769361 | 0.0041901  | 52.9    |
| gi 115549356 dbj AK235378.1 | skyblue       | 574.15899 | 42.37714  | 0.9874395 | 0.00168665 | 14.834  |
| gi 115549358 dbj AK235380.1 | yellow        | 303.87893 | 121.15166 | 0.9738551 | 0.00505481 | 15.048  |
| gi 115549368 dbj AK235390.1 | green         | 852.74819 | 116.68908 | 0.9991979 | 2.73E-05   | 5.768   |
| gi 115549412 dbj AK235434.1 | turquoise     | 264.22926 | 90.892143 | 0.6548244 | 0.23041955 | 37.634  |
| gi 115549416 dbj AK235438.1 | skyblue       | 627.8844  | 39.929977 | 0.973089  | 0.00527799 | 2.896   |
| gi 115549428 dbj AK235450.1 | brown         | 732.44012 | 134.8806  | 0.9969592 | 0.0002012  | 72.316  |
| gi 115549440 dbj AK235462.1 | darkred       | 126.6215  | 30.451326 | 0.8845775 | 0.04624918 | 220.136 |
| gi 115549451 dbj AK235473.1 | turquoise     | 245.26756 | 93.538693 | 0.7388327 | 0.15378741 | 11.078  |
| gi 115549474 dbj AK235496.1 | pink          | 832.44031 | 146.16187 | 0.9950042 | 0.00042356 | 13.632  |
| gi 115549475 dbj AK235497.1 | magenta       | 264.97688 | 73.685935 | 0.9650048 | 0.00781723 | 68.216  |
| gi 115549482 dbj AK235504.1 | greenyellow   | 197.93696 | 40.489993 | 0.9751654 | 0.00468054 | 7.56    |
| gi 115549486 dbj AK235508.1 | red           | 825.84961 | 121.2253  | 0.9889756 | 0.00138722 | 5.18    |
| gi 115549499 dbj AK235521.1 | green         | 766.58229 | 113.53533 | 0.9941312 | 0.00053923 | 8.798   |
| gi 115549531 dbj AK235553.1 | lightcyan     | 369.34861 | 57.249648 | 0.9891367 | 0.00135695 | 76.29   |
| gi 115549536 dbj AK235558.1 | orange        | 273.82404 | 36.634663 | 0.9883787 | 0.00150127 | 6.71    |
| gi 115549537 dbj AK235559.1 | turquoise     | 961.34628 | 222.76604 | 0.9661831 | 0.00742709 | 12.178  |
| gi 115549542 dbj AK235564.1 | tan           | 164.53376 | 29.95908  | 0.8511828 | 0.06735556 | 20.284  |
| gi 115549562 dbj AK238370.1 | white         | 925.46103 | 47.282408 | 0.9784127 | 0.00379508 | 5.27    |
| gi 115549583 dbj AK238391.1 | darkturquoise | 241.81328 | 38.45244  | 0.9460857 | 0.0149055  | 0.818   |
| gi 115549608 dbj AK238416.1 | lightgreen    | 468.71915 | 36.161609 | 0.896741  | 0.03920867 | 20.55   |
| gi 115549613 dbj AK238421.1 | grey60        | 282.38046 | 60.552824 | 0.9705005 | 0.00605514 | 27.794  |
| gi 115549633 dbj AK238441.1 | magenta       | 384.31766 | 76.342445 | 0.9672064 | 0.00709366 | 45.356  |
| gi 115549680 dbj AK231959.1 | blue          | 544.92876 | 111.06323 | 0.9290949 | 0.0224221  | 26.11   |
| gi 115549689 dbj AK231968.1 | lightgreen    | 98.144822 | 12.649494 | 0.5626059 | 0.32349277 | 83.096  |
| gi 115549696 dbj AK231975.1 | turquoise     | 166.78553 | 53.846851 | 0.4874545 | 0.40489286 | 27.91   |
| gi 115549709 dbj AK231988.1 | orange        | 235.92661 | 37.534119 | 0.9961094 | 0.00029115 | 10.068  |
| gi 115549710 dbj AK231989.1 | turquoise     | 354.22449 | 55.984903 | -0.07636  | 0.90287005 | 18.918  |
| gi 115549744 dbj AK232023.1 | lightyellow   | 425.55352 | 63.275377 | 0.9956888 | 0.00033958 | 135.396 |
| gi 115549779 dbj AK232059.1 | white         | 804.51865 | 43.372335 | 0.9513661 | 0.01278051 | 15.1    |
| gi 115549787 dbj AK232067.1 | royalblue     | 580.5174  | 62.531814 | 0.9935504 | 0.00062117 | 58.134  |
| gi 115549809 dbj AK232089.1 | turquoise     | 856.97884 | 219.76096 | 0.9786344 | 0.00373687 | 22.914  |
| gi 115549835 dbj AK238495.1 | yellow        | 250.24382 | 113.62085 | 0.9617572 | 0.00892589 | 14.206  |
| gi 115549846 dbj AK238506.1 | greenyellow   | 45.17311  | 9.1217382 | 0.3298287 | 0.58779263 | 45.322  |
| gi 115549856 dbj AK238516.1 | darkorange    | 69.817336 | 18.674546 | 0.7881639 | 0.11324747 | 19.05   |
| gi 115549861 dbj AK238521.1 | blue          | 548.86835 | 122.46312 | 0.950745  | 0.01302492 | 3.912   |
| gi 115549895 dbj AK238555.1 | magenta       | 127.51338 | 38.436048 | 0.8220382 | 0.08767524 | 8.488   |
| gi 115549900 dbj AK232134.1 | darkgreen     | 216.79004 | 37.305846 | 0.9572655 | 0.01053654 | 48.654  |
| gi 115549949 dbj AK232184.1 | brown         | 805.57416 | 128.2756  | 0.9781483 | 0.00386486 | 60.502  |
| gi 115549956 dbj AK232191.1 | violet        | 949.76045 | 46.106476 | 0.9787375 | 0.00370992 | 9.14    |
| gi 115549963 dbj AK232198.1 | turquoise     | 481.29645 | 115.89844 | 0.747602  | 0.14631725 | 44.358  |
| gi 115549970 dbj AK232205.1 | pink          | 607.88586 | 116.06899 | 0.9478517 | 0.014183   | 110.26  |
| gi 115549997 dbj AK232232.1 | turquoise     | 459.11871 | 152.11183 | 0.8807852 | 0.04851841 | 2.4     |
| gi 115550002 dbj AK232237.1 | skyblue       | 403.37247 | 42.044621 | 0.9871741 | 0.00174031 | 16.962  |
| gi 115550007 dbj AK232242.1 | blue          | 584.02087 | 109.74198 | 0.925868  | 0.02395815 | 130.588 |

|                             |               |           |           |           |            |         |
|-----------------------------|---------------|-----------|-----------|-----------|------------|---------|
| gi 115550036 dbj AK232271.1 | blue          | 742.84607 | 136.12464 | 0.9739202 | 0.00503598 | 74.618  |
| gi 115550039 dbj AK232274.1 | lightgreen    | 366.49073 | 31.217289 | 0.9105748 | 0.03166731 | 48.472  |
| gi 115550042 dbj AK232277.1 | yellow        | 277.63291 | 110.43175 | 0.9499479 | 0.01334074 | 81.342  |
| gi 115550054 dbj AK232289.1 | tan           | 278.99299 | 26.984922 | 0.7917388 | 0.1104565  | 13.192  |
| gi 115550058 dbj AK232293.1 | tan           | 210.8276  | 39.920621 | 0.9202752 | 0.02669692 | 11.596  |
| gi 115550060 dbj AK232295.1 | darkgreen     | 117.7451  | 15.620672 | 0.7180664 | 0.17190025 | 69.238  |
| gi 115550075 dbj AK232310.1 | lightyellow   | 394.23194 | 57.313863 | 0.9738829 | 0.00504676 | 1.22    |
| gi 115550091 dbj AK232326.1 | yellow        | 190.99152 | 78.152187 | 0.8746578 | 0.05225662 | 3.706   |
| gi 115550101 dbj AK235580.1 | darkred       | 202.9249  | 45.75911  | 0.983919  | 0.00244205 | 27.276  |
| gi 115550102 dbj AK235581.1 | brown         | 830.38359 | 125.61592 | 0.9733503 | 0.00520151 | 7.51    |
| gi 115550120 dbj AK235599.1 | turquoise     | 672.55286 | 169.22028 | 0.903132  | 0.03566079 | 18.678  |
| gi 115550124 dbj AK235603.1 | darkgreen     | 100.75848 | 14.71661  | 0.6938188 | 0.19376453 | 362.496 |
| gi 115550125 dbj AK235604.1 | tan           | 169.89846 | 30.185785 | 0.8530695 | 0.06609835 | 4.514   |
| gi 115550130 dbj AK235609.1 | salmon        | 227.49214 | 77.499973 | 0.9984969 | 6.99E-05   | 11.912  |
| gi 115550133 dbj AK235612.1 | darkorange    | 160.96357 | 29.484245 | 0.9476757 | 0.01425444 | 107.012 |
| gi 115550140 dbj AK235619.1 | tan           | 167.5943  | 44.957379 | 0.9775538 | 0.00402328 | 38.764  |
| gi 115550155 dbj AK235634.1 | turquoise     | 413.49795 | 141.33074 | 0.8575143 | 0.06316606 | 27.342  |
| gi 115550159 dbj AK235638.1 | yellow        | 279.88144 | 130.29897 | 0.9919463 | 0.00086656 | 160.858 |
| gi 115550165 dbj AK235644.1 | yellow        | 298.38515 | 132.59223 | 0.9960409 | 0.00029886 | 53.794  |
| gi 115550185 dbj AK235664.1 | brown         | 875.75562 | 111.85396 | 0.9460071 | 0.01493792 | 8.382   |
| gi 115550186 dbj AK235665.1 | turquoise     | 915.15766 | 219.25791 | 0.9691271 | 0.00648155 | 19.204  |
| gi 115550191 dbj AK235670.1 | turquoise     | 796.88328 | 207.13381 | 0.9560885 | 0.01097285 | 9.544   |
| gi 115550210 dbj AK235689.1 | greenyellow   | 98.925732 | 17.486783 | 0.7539717 | 0.14096024 | 10.884  |
| gi 115550254 dbj AK235733.1 | tan           | 80.135582 | 20.150412 | 0.693576  | 0.19398717 | 28.126  |
| gi 115550257 dbj AK235736.1 | green         | 653.21647 | 103.36732 | 0.9735785 | 0.00513502 | 14.25   |
| gi 115550270 dbj AK235749.1 | salmon        | 228.0379  | 74.954037 | 0.9907844 | 0.00106052 | 8.802   |
| gi 115550272 dbj AK235751.1 | lightgreen    | 420.63899 | 28.600189 | 0.9045014 | 0.03491468 | 64.822  |
| gi 115550273 dbj AK235752.1 | blue          | 803.54679 | 147.94015 | 0.9926648 | 0.00075331 | 21.066  |
| gi 115550292 dbj AK235771.1 | skyblue       | 615.18576 | 40.65116  | 0.9774938 | 0.00403938 | 23.278  |
| gi 115550321 dbj AK238586.1 | turquoise     | 228.1312  | 86.545512 | 0.6934254 | 0.19412536 | 27.97   |
| gi 115550332 dbj AK238597.1 | pink          | 665.21487 | 117.05377 | 0.9504943 | 0.01312397 | 56.998  |
| gi 115550354 dbj AK238619.1 | tan           | 86.573439 | 22.608928 | 0.7538025 | 0.14110175 | 79.598  |
| gi 115550357 dbj AK238622.1 | green         | 953.06863 | 105.22681 | 0.9720316 | 0.0055912  | 31.668  |
| gi 115550392 dbj AK238657.1 | lightcyan     | 317.16828 | 49.616275 | 0.9550761 | 0.01135275 | 16.84   |
| gi 115550394 dbj AK238659.1 | green         | 569.23454 | 92.473347 | 0.9490696 | 0.01369158 | 7.134   |
| gi 115550410 dbj AK238675.1 | royalblue     | 673.33093 | 63.955302 | 0.9981044 | 9.90E-05   | 1.61    |
| gi 115550429 dbj AK238694.1 | blue          | 469.00405 | 73.382986 | 0.837373  | 0.07677754 | 30.546  |
| gi 115550430 dbj AK238695.1 | brown         | 732.88351 | 133.63169 | 0.9949134 | 0.00043516 | 16.026  |
| gi 115550441 dbj AK238706.1 | navy          | 93.032488 | 37.379393 | 0.9719322 | 0.00562096 | 8.602   |
| gi 115550443 dbj AK238708.1 | turquoise     | 823.77348 | 195.30902 | 0.9364508 | 0.01904649 | 14.924  |
| gi 115550448 dbj AK238713.1 | grey60        | 277.52959 | 57.344214 | 0.9592131 | 0.00982744 | 62.19   |
| gi 115550486 dbj AK238751.1 | red           | 799.45382 | 116.31837 | 0.9806101 | 0.00323169 | 2.174   |
| gi 115550510 dbj AK232340.1 | darkgreen     | 161.52574 | 20.927646 | 0.8035898 | 0.10135662 | 9.522   |
| gi 115550524 dbj AK232354.1 | darkturquoise | 154.98372 | 39.464241 | 0.9551005 | 0.01134357 | 138.668 |
| gi 115550537 dbj AK232367.1 | yellow        | 295.07532 | 129.94319 | 0.9913982 | 0.00095643 | 20.528  |
| gi 115550567 dbj AK232397.1 | lightyellow   | 625.03028 | 58.16862  | 0.9754209 | 0.00460867 | 11.17   |
| gi 115550593 dbj AK232423.1 | yellow        | 120.95408 | 52.772095 | 0.7879894 | 0.11338423 | 157.048 |
| gi 115550595 dbj AK232425.1 | green         | 847.50829 | 113.76254 | 0.9942156 | 0.00052765 | 5.004   |



|                             |               |           |           |           |            |         |
|-----------------------------|---------------|-----------|-----------|-----------|------------|---------|
| gi 115550607 dbj AK232437.1 | magenta       | 357.7385  | 79.119142 | 0.9767689 | 0.00423564 | 25.548  |
| gi 115550650 dbj AK232480.1 | pink          | 897.03211 | 145.90294 | 0.9945807 | 0.00047852 | 1.726   |
| gi 115550656 dbj AK232486.1 | turquoise     | 939.56758 | 217.09557 | 0.9507537 | 0.01302145 | 35.886  |
| gi 115550661 dbj AK232491.1 | yellow        | 271.13721 | 117.26104 | 0.9664834 | 0.00732872 | 21.062  |
| gi 115550668 dbj AK232498.1 | grey          | 303.77948 | 12.231518 | 0.9453339 | 0.01521661 | 3.102   |
| gi 115550708 dbj AK235782.1 | grey60        | 307.77368 | 66.771941 | 0.9916083 | 0.00092164 | 93.34   |
| gi 115550716 dbj AK235790.1 | orange        | 191.86713 | 35.666807 | 0.9729914 | 0.00530665 | 0.206   |
| gi 115550732 dbj AK235806.1 | lightcyan     | 268.68699 | 48.281488 | 0.9438213 | 0.01584885 | 17.412  |
| gi 115550746 dbj AK235820.1 | paleturquoise | 169.19396 | 21.822245 | 0.9147418 | 0.0294988  | 7.41    |
| gi 115550755 dbj AK235829.1 | brown         | 312.27608 | 58.053511 | 0.8131073 | 0.09422292 | 18.316  |
| gi 115550758 dbj AK235833.1 | turquoise     | 350.39271 | 88.804283 | 0.6663879 | 0.21936666 | 25.958  |
| gi 115550768 dbj AK235843.1 | turquoise     | 998.76278 | 199.9013  | 0.9147382 | 0.02950069 | 21.108  |
| gi 115550785 dbj AK235860.1 | navy          | 69.120478 | 5.8900866 | -0.980346 | 0.00329789 | 39.074  |
| gi 115550806 dbj AK235881.1 | green         | 974.66294 | 101.40293 | 0.9635264 | 0.00831594 | 20.878  |
| gi 115550812 dbj AK235887.1 | turquoise     | 580.2985  | 151.2698  | 0.8769572 | 0.05084356 | 5.554   |
| gi 115550819 dbj AK235894.1 | blue          | 942.68666 | 139.75541 | 0.9778837 | 0.0039351  | 13.824  |
| gi 115550826 dbj AK235901.1 | turquoise     | 531.98155 | 169.42332 | 0.9289448 | 0.0224928  | 20.074  |
| gi 115550838 dbj AK235913.1 | purple        | 279.84486 | 76.294955 | 0.9881557 | 0.00154464 | 135.132 |
| gi 115550848 dbj AK235923.1 | darkmagenta   | 174.61948 | 3.336137  | -0.69683  | 0.19100872 | 241.606 |
| gi 115550868 dbj AK235943.1 | greenyellow   | 195.50858 | 40.434969 | 0.9753845 | 0.00461889 | 11.982  |
| gi 115550874 dbj AK235949.1 | greenyellow   | 54.188232 | 11.768751 | 0.3389664 | 0.57682797 | 21.918  |
| gi 115550888 dbj AK235963.1 | skyblue       | 505.94778 | 43.192405 | 0.9932317 | 0.00066774 | 3.788   |
| gi 115550889 dbj AK235964.1 | tan           | 150.72261 | 22.033715 | 0.7662116 | 0.13083365 | 72.794  |
| gi 115550900 dbj AK238761.1 | turquoise     | 927.79272 | 196.81542 | 0.9146623 | 0.02953973 | 19.732  |
| gi 115550915 dbj AK238776.1 | yellow        | 272.61364 | 85.272865 | 0.8896631 | 0.04326071 | 5.222   |
| gi 115550943 dbj AK238804.1 | black         | 935.14272 | 100.55415 | 0.9819369 | 0.00290631 | 12.454  |
| gi 115550946 dbj AK238807.1 | turquoise     | 846.50813 | 208.19947 | 0.9424616 | 0.01642427 | 16.784  |
| gi 115550960 dbj AK238821.1 | lightyellow   | 414.97692 | 63.161152 | 0.9953056 | 0.00038583 | 6.312   |
| gi 115550961 dbj AK238822.1 | darkgrey      | 918.82154 | 50.856267 | 0.9848677 | 0.00222949 | 48.594  |
| gi 115550973 dbj AK238834.1 | skyblue       | 290.19128 | 31.813978 | 0.9240941 | 0.02481643 | 2.6     |
| gi 115550975 dbj AK238836.1 | blue          | 522.03415 | 115.04593 | 0.9376101 | 0.01853097 | 118.318 |
| gi 115550976 dbj AK238837.1 | red           | 987.66865 | 117.18214 | 0.9808948 | 0.00316092 | 35.526  |
| gi 115550989 dbj AK238850.1 | salmon        | 217.7294  | 71.561122 | 0.9813393 | 0.00305145 | 31.154  |
| gi 115550999 dbj AK238860.1 | darkred       | 211.56584 | 45.054652 | 0.9798357 | 0.00342681 | 25.47   |
| gi 115551001 dbj AK238862.1 | brown         | 838.30688 | 113.71395 | 0.9458798 | 0.01499048 | 169.798 |
| gi 115551006 dbj AK238867.1 | turquoise     | 905.60228 | 223.38991 | 0.9727157 | 0.00538787 | 12.41   |
| gi 115551027 dbj AK238888.1 | brown         | 582.98627 | 119.41889 | 0.974862  | 0.00476635 | 8.436   |
| gi 115551063 dbj AK238924.1 | grey          | 351.86657 | 13.394531 | 0.9656872 | 0.00759049 | 23.222  |
| gi 115551074 dbj AK238935.1 | magenta       | 268.71584 | 79.804355 | 0.9823774 | 0.00280082 | 5.076   |
| gi 115551086 dbj AK238947.1 | pink          | 880.72335 | 149.24487 | 0.9991952 | 2.74E-05   | 3.196   |
| gi 115551105 dbj AK232538.1 | black         | 728.20574 | 90.493092 | 0.9618532 | 0.00889244 | 19.392  |
| gi 115551122 dbj AK232555.1 | orange        | 450.18809 | 17.08399  | 0.7553959 | 0.1397705  | 66.85   |
| gi 115551124 dbj AK232557.1 | purple        | 303.71604 | 75.568958 | 0.9845687 | 0.00229578 | 20.778  |
| gi 115551148 dbj AK232581.1 | magenta       | 388.79125 | 78.923121 | 0.9743697 | 0.00490667 | 18.536  |
| gi 115551177 dbj AK232610.1 | navy          | 158.74197 | 33.700394 | 0.9322764 | 0.02094025 | 26.7    |
| gi 115551181 dbj AK232614.1 | yellow        | 281.53348 | 122.80747 | 0.9769932 | 0.0041746  | 49.676  |
| gi 115551189 dbj AK232622.1 | turquoise     | 957.5477  | 208.9591  | 0.9420683 | 0.01659195 | 9.086   |
| gi 115551213 dbj AK232646.1 | darkgrey      | 953.25642 | 52.546867 | 0.9911276 | 0.00100189 | 5.452   |

|                             |               |           |           |           |            |         |
|-----------------------------|---------------|-----------|-----------|-----------|------------|---------|
| gi 115551216 dbj AK232649.1 | brown         | 719.65113 | 134.63897 | 0.9949185 | 0.0004345  | 21.268  |
| gi 115551255 dbj AK232688.1 | black         | 777.01254 | 103.91734 | 0.9900243 | 0.00119425 | 11.382  |
| gi 115551270 dbj AK232704.1 | navy          | 432.38052 | 10.762438 | 0.0001063 | 0.99986466 | 556.554 |
| gi 115551283 dbj AK232717.1 | brown         | 526.29194 | 88.064595 | 0.9040467 | 0.03516186 | 49.422  |
| gi 115551304 dbj AK235982.1 | midnightblue  | 811.9423  | 72.559368 | 0.9825404 | 0.00276213 | 9.6     |
| gi 115551308 dbj AK235986.1 | tan           | 122.6802  | 33.112917 | 0.8863062 | 0.04522625 | 12.688  |
| gi 115551350 dbj AK236028.1 | turquoise     | 979.41017 | 219.66538 | 0.9522512 | 0.01243491 | 6.78    |
| gi 115551358 dbj AK236036.1 | turquoise     | 680.193   | 189.70133 | 0.9313778 | 0.02135548 | 17.47   |
| gi 115551374 dbj AK236052.1 | midnightblue  | 892.34143 | 77.285272 | 0.9954336 | 0.00037016 | 7.484   |
| gi 115551375 dbj AK236053.1 | blue          | 782.8505  | 150.73723 | 0.9974987 | 0.00015011 | 7.59    |
| gi 115551387 dbj AK236065.1 | brown         | 731.26947 | 133.36744 | 0.9943828 | 0.00050495 | 14.732  |
| gi 115551391 dbj AK236069.1 | green         | 477.73189 | 62.650193 | 0.8661708 | 0.05757637 | 10.458  |
| gi 115551397 dbj AK236075.1 | brown         | 433.23408 | 76.501981 | 0.8744567 | 0.05238077 | 48.296  |
| gi 115551408 dbj AK236086.1 | tan           | 119.43601 | 36.60337  | 0.9051562 | 0.0345597  | 88.862  |
| gi 115551416 dbj AK236094.1 | paleturquoise | 178.92902 | 25.868023 | 0.9698994 | 0.0062406  | 33.626  |
| gi 115551438 dbj AK236116.1 | lightgreen    | 204.9924  | 24.194609 | 0.7630856 | 0.13339858 | 29.284  |
| gi 115551444 dbj AK236122.1 | turquoise     | 1013.2528 | 201.32295 | 0.915925  | 0.02889214 | 2.592   |
| gi 115551449 dbj AK236127.1 | yellow        | 212.60967 | 100.82079 | 0.9334858 | 0.02038562 | 175.8   |
| gi 115551452 dbj AK236130.1 | turquoise     | 449.46141 | 146.39754 | 0.8801628 | 0.04889411 | 16.232  |
| gi 115551471 dbj AK236149.1 | lightgreen    | 145.88473 | 15.974304 | 0.7797144 | 0.11992646 | 20.074  |
| gi 115551473 dbj AK236151.1 | purple        | 257.41519 | 64.629748 | 0.9498628 | 0.0133746  | 6.67    |
| gi 115551475 dbj AK236153.1 | turquoise     | 470.73882 | 154.70962 | 0.9073784 | 0.03336373 | 113.442 |
| gi 115551476 dbj AK236154.1 | midnightblue  | 897.17163 | 77.562319 | 0.9960916 | 0.00029315 | 12.04   |
| gi 115551480 dbj AK236158.1 | turquoise     | 989.30838 | 220.44231 | 0.9569799 | 0.0106419  | 5.924   |
| gi 115551482 dbj AK236160.1 | magenta       | 419.76548 | 77.220013 | 0.967384  | 0.00703631 | 11.576  |
| gi 115551497 dbj AK238961.1 | blue          | 618.66925 | 128.33535 | 0.9629011 | 0.00852991 | 75.646  |
| gi 115551518 dbj AK238982.1 | tan           | 112.84552 | 34.28066  | 0.9051918 | 0.03454046 | 53.66   |
| gi 115551521 dbj AK238985.1 | white         | 923.4202  | 47.295466 | 0.9812665 | 0.0030693  | 247.302 |
| gi 115551534 dbj AK238998.1 | skyblue       | 357.00234 | 38.807828 | 0.9691612 | 0.00647085 | 56.894  |
| gi 115551587 dbj AK239051.1 | brown         | 184.73748 | 20.768368 | 0.5400358 | 0.34746692 | 8.564   |
| gi 115551605 dbj AK239069.1 | darkturquoise | 142.2862  | 39.228165 | 0.9579477 | 0.01028631 | 17.186  |
| gi 115551606 dbj AK239070.1 | violet        | 166.69904 | 8.4344384 | 0.3713695 | 0.53826306 | 10.646  |
| gi 115551623 dbj AK239087.1 | black         | 797.73804 | 105.03541 | 0.992362  | 0.0008004  | 4.398   |
| gi 115551627 dbj AK239091.1 | darkgreen     | 254.38832 | 41.572303 | 0.9848011 | 0.00224419 | 23.578  |
| gi 115551631 dbj AK239095.1 | lightcyan     | 272.70212 | 39.187098 | 0.9032201 | 0.03561264 | 3.85    |
| gi 115551640 dbj AK239104.1 | blue          | 654.7377  | 77.87746  | 0.8464491 | 0.07054199 | 27.258  |
| gi 115551642 dbj AK239106.1 | salmon        | 219.43226 | 73.244098 | 0.9859714 | 0.00199039 | 88.07   |
| gi 115551652 dbj AK239116.1 | green         | 954.9557  | 100.27686 | 0.963179  | 0.00843458 | 142.774 |
| gi 115551691 dbj AK230600.1 | magenta       | 117.11158 | 34.555046 | 0.8032351 | 0.10162556 | 11.092  |
| gi 115551695 dbj AK232156.1 | turquoise     | 313.79379 | 103.94719 | 0.7173216 | 0.17256064 | 20.118  |
| gi 115551776 dbj AK236182.1 | blue          | 738.80866 | 109.95035 | 0.9243519 | 0.0246911  | 116.754 |
| gi 115551783 dbj AK236189.1 | midnightblue  | 979.7029  | 75.351192 | 0.9895969 | 0.00127175 | 10.506  |
| gi 115551790 dbj AK236196.1 | tan           | 197.29013 | 30.975271 | 0.8444326 | 0.0719132  | 19.056  |
| gi 115551791 dbj AK236197.1 | royalblue     | 603.02796 | 63.09816  | 0.9956978 | 0.00033852 | 9.426   |
| gi 115551828 dbj AK236235.1 | blue          | 684.61108 | 125.64404 | 0.9563208 | 0.01088627 | 6.838   |
| gi 115551842 dbj AK236249.1 | turquoise     | 463.92355 | 135.18121 | 0.8462752 | 0.07065995 | 10.588  |
| gi 115551862 dbj AK236269.1 | paleturquoise | 175.50553 | 26.822862 | 0.9825342 | 0.0027636  | 9.038   |
| gi 115551864 dbj AK236271.1 | turquoise     | 189.66965 | 73.840828 | 0.6051815 | 0.279492   | 6.088   |

|                             |              |           |           |           |            |         |
|-----------------------------|--------------|-----------|-----------|-----------|------------|---------|
| gi 115551880 dbj AK236287.1 | green        | 945.4074  | 112.55803 | 0.9904779 | 0.00111382 | 4.846   |
| gi 115551881 dbj AK236288.1 | red          | 888.14051 | 124.5843  | 0.9942386 | 0.00052451 | 5.596   |
| gi 115551894 dbj AK236301.1 | yellow       | 260.60282 | 104.94621 | 0.9395119 | 0.01769532 | 20.162  |
| gi 115551903 dbj AK236310.1 | brown        | 113.77527 | 14.576623 | 0.428485  | 0.47162302 | 9.402   |
| gi 115551909 dbj AK236316.1 | pink         | 847.6046  | 146.29429 | 0.9951659 | 0.00040317 | 2.544   |
| gi 115551914 dbj AK236321.1 | black        | 931.44433 | 100.76068 | 0.9822754 | 0.00282514 | 4.848   |
| gi 115551917 dbj AK236324.1 | darkorange   | 111.73861 | 31.073275 | 0.9507001 | 0.01304262 | 155.186 |
| gi 115551923 dbj AK236330.1 | darkred      | 194.03771 | 44.117634 | 0.9739578 | 0.00502511 | 2.864   |
| gi 115551932 dbj AK236339.1 | blue         | 860.84673 | 130.99362 | 0.9632777 | 0.00840083 | 82.006  |
| gi 115551933 dbj AK236340.1 | orange       | 440.3458  | 29.707564 | 0.939547  | 0.01768002 | 20.538  |
| gi 115551938 dbj AK236345.1 | brown        | 768.93948 | 134.06881 | 0.9928371 | 0.00072694 | 15.604  |
| gi 115551942 dbj AK236349.1 | red          | 852.28699 | 125.86886 | 0.9965588 | 0.0002422  | 5.452   |
| gi 115551948 dbj AK236355.1 | lightcyan    | 414.90852 | 59.116574 | 0.9937341 | 0.00059483 | 7.978   |
| gi 115551969 dbj AK239162.1 | brown        | 439.23241 | 88.562783 | 0.9078825 | 0.03309431 | 6.136   |
| gi 115551993 dbj AK239186.1 | midnightblue | 867.07591 | 72.304427 | 0.9811158 | 0.00310633 | 10.344  |
| gi 115551997 dbj AK239190.1 | lightgreen   | 375.88145 | 39.095533 | 0.9462616 | 0.014833   | 3.708   |
| gi 115552025 dbj AK239218.1 | turquoise    | 964.91442 | 226.677   | 0.9734737 | 0.0051655  | 4.346   |
| gi 115552029 dbj AK239222.1 | darkred      | 130.47449 | 21.056992 | 0.7978277 | 0.10575157 | 24.43   |
| gi 115552039 dbj AK239232.1 | turquoise    | 1014.6113 | 220.03199 | 0.9516439 | 0.01267173 | 3.422   |
| gi 115552041 dbj AK239234.1 | tan          | 153.66251 | 45.636855 | 0.9860862 | 0.00196604 | 9.322   |
| gi 115552061 dbj AK239254.1 | turquoise    | 280.57539 | 107.6196  | 0.7844283 | 0.11618612 | 7.492   |
| gi 115552064 dbj AK239257.1 | black        | 843.74409 | 104.21008 | 0.9900179 | 0.00119541 | 11.37   |
| gi 115552079 dbj AK239272.1 | grey         | 301.76919 | 12.735248 | 0.9531444 | 0.01208926 | 6.006   |
| gi 115552089 dbj AK239282.1 | blue         | 846.72    | 140.75264 | 0.9807578 | 0.00319491 | 41.632  |
| gi 115552097 dbj AK239290.1 | pink         | 695.7687  | 131.85706 | 0.9738125 | 0.00506713 | 30.618  |
| gi 115552101 dbj AK239294.1 | darkorange   | 99.587904 | 11.171426 | 0.6394644 | 0.24532873 | 20.376  |
| gi 115552119 dbj AK239312.1 | turquoise    | 922.09665 | 223.58969 | 0.9741227 | 0.00497759 | 5.712   |
| gi 115552139 dbj AK239332.1 | turquoise    | 198.99721 | 80.062448 | 0.6734209 | 0.21271829 | 12.642  |
| gi 115552153 dbj AK239346.1 | navy         | 900.46682 | 18.663099 | -0.088942 | 0.88690537 | 9.422   |
| gi 115552177 dbj AK230486.1 | skyblue      | 547.34411 | 43.574733 | 0.9941126 | 0.0005418  | 1821.55 |
| gi 115552179 dbj AK230488.1 | greenyellow  | 204.98117 | 34.404129 | 0.9684045 | 0.0067097  | 35.09   |
| gi 115552191 dbj AK230500.1 | turquoise    | 216.84245 | 78.822458 | 0.5962433 | 0.28859025 | 22.298  |
| gi 115552195 dbj AK230504.1 | brown        | 323.30857 | 58.050926 | 0.8136236 | 0.09384047 | 24.962  |
| gi 115552216 dbj AK230525.1 | royalblue    | 719.27547 | 63.136587 | 0.9950459 | 0.00041827 | 3.64    |
| gi 115552220 dbj AK230529.1 | black        | 897.11051 | 103.7031  | 0.9885574 | 0.00146681 | 6.568   |
| gi 115552234 dbj AK230543.1 | red          | 894.62975 | 127.58416 | 0.9992509 | 2.46E-05   | 2.438   |
| gi 115552246 dbj AK230555.1 | turquoise    | 630.50937 | 164.71268 | 0.9071055 | 0.03350991 | 4.144   |
| gi 115552250 dbj AK230559.1 | lightcyan    | 426.46525 | 42.532068 | 0.9171782 | 0.02825406 | 49.056  |
| gi 115552260 dbj AK230569.1 | tan          | 227.9715  | 36.243036 | 0.9278066 | 0.02303138 | 30.424  |
| gi 115552269 dbj AK230578.1 | white        | 1002.7339 | 43.076693 | 0.9885676 | 0.00146485 | 12.818  |
| gi 115552272 dbj AK230581.1 | brown        | 643.32612 | 130.22667 | 0.9927593 | 0.00073881 | 12.298  |
| gi 115552281 dbj AK230590.1 | green        | 801.04309 | 114.6422  | 0.9964464 | 0.00025415 | 19.204  |
| gi 115552282 dbj AK230591.1 | midnightblue | 626.84529 | 65.19363  | 0.9596721 | 0.00966268 | 45.446  |
| gi 115552295 dbj AK230605.1 | midnightblue | 901.19487 | 70.849683 | 0.9768104 | 0.00422434 | 13.254  |
| gi 115552309 dbj AK230619.1 | turquoise    | 321.01327 | 85.365439 | 0.6340248 | 0.25066909 | 114.394 |
| gi 115552311 dbj AK230621.1 | skyblue      | 343.63553 | 36.677224 | 0.9577045 | 0.0103753  | 26.226  |
| gi 115552314 dbj AK230624.1 | turquoise    | 620.83461 | 167.11183 | 0.8746933 | 0.05223472 | 30.668  |
| gi 115552353 dbj AK232758.1 | turquoise    | 841.22783 | 204.37263 | 0.9480046 | 0.01412097 | 11.118  |

|                             |               |           |           |           |            |          |
|-----------------------------|---------------|-----------|-----------|-----------|------------|----------|
| gi 115552359 dbj AK232764.1 | grey60        | 284.32478 | 54.258069 | 0.9479596 | 0.0141392  | 76.344   |
| gi 115552369 dbj AK236374.1 | green         | 872.36687 | 115.52444 | 0.9962839 | 0.00027178 | 2.934    |
| gi 115552393 dbj AK236398.1 | salmon        | 228.72767 | 72.907579 | 0.9841866 | 0.00238145 | 20.292   |
| gi 115552399 dbj AK236404.1 | yellow        | 272.42883 | 92.417761 | 0.9079084 | 0.0330805  | 29.664   |
| gi 115552409 dbj AK236414.1 | turquoise     | 440.67937 | 145.30532 | 0.8617729 | 0.06039592 | 3.124    |
| gi 115552411 dbj AK236416.1 | navy          | 251.37636 | 32.067198 | 0.9293218 | 0.02231533 | 2.172    |
| gi 115552413 dbj AK236418.1 | black         | 684.95477 | 96.14953  | 0.9738662 | 0.00505158 | 12.39    |
| gi 115552415 dbj AK236420.1 | darkred       | 133.45244 | 28.923009 | 0.8608583 | 0.06098757 | 24.242   |
| gi 115552428 dbj AK236433.1 | brown         | 72.121576 | 6.0097184 | 0.1077948 | 0.86301765 | 1815.946 |
| gi 115552430 dbj AK236435.1 | turquoise     | 765.39292 | 195.29717 | 0.9448087 | 0.01543517 | 28.692   |
| gi 115552454 dbj AK236459.1 | blue          | 567.58703 | 106.0047  | 0.9166033 | 0.0285462  | 11.562   |
| gi 115552473 dbj AK236478.1 | red           | 824.65027 | 122.56788 | 0.9910971 | 0.00100705 | 67.94    |
| gi 115552477 dbj AK236482.1 | red           | 760.06663 | 115.64747 | 0.9792034 | 0.00358892 | 5.59     |
| gi 115552482 dbj AK236487.1 | pink          | 885.32223 | 148.1656  | 0.9976938 | 0.0001329  | 16.784   |
| gi 115552488 dbj AK236493.1 | turquoise     | 752.72679 | 187.44442 | 0.9191965 | 0.02723604 | 13.894   |
| gi 115552491 dbj AK236496.1 | magenta       | 281.92377 | 85.747864 | 0.9980763 | 0.00010126 | 8.988    |
| gi 115552492 dbj AK236497.1 | darkorange    | 119.43258 | 30.827153 | 0.9538894 | 0.01180341 | 16.906   |
| gi 115552519 dbj AK236524.1 | white         | 601.46919 | 34.194558 | 0.8584151 | 0.06257689 | 10.022   |
| gi 115552523 dbj AK236528.1 | darkorange    | 139.23407 | 33.721227 | 0.9836271 | 0.00250872 | 73.542   |
| gi 115552527 dbj AK236532.1 | pink          | 854.28658 | 148.29408 | 0.9979212 | 0.00011374 | 47.78    |
| gi 115552544 dbj AK236549.1 | darkorange    | 99.540024 | 30.386587 | 0.9384803 | 0.01814708 | 17.472   |
| gi 115552549 dbj AK236554.1 | green         | 656.99483 | 88.134951 | 0.9385805 | 0.01810305 | 14.94    |
| gi 115552559 dbj AK236564.1 | yellow        | 265.88512 | 120.13031 | 0.9732843 | 0.00522079 | 15.784   |
| gi 115552575 dbj AK232780.1 | green         | 971.33043 | 104.05905 | 0.970984  | 0.00590734 | 32.604   |
| gi 115552583 dbj AK232788.1 | blue          | 567.51986 | 114.81994 | 0.937741  | 0.01847306 | 26.182   |
| gi 115552627 dbj AK232832.1 | blue          | 935.1136  | 144.99434 | 0.9862166 | 0.0019385  | 2.656    |
| gi 115552638 dbj AK232843.1 | magenta       | 256.40333 | 84.545421 | 0.9949247 | 0.00043371 | 15.054   |
| gi 115552645 dbj AK232850.1 | darkturquoise | 119.16024 | 33.414014 | 0.9189823 | 0.02734353 | 55.89    |
| gi 115552656 dbj AK232861.1 | pink          | 993.39705 | 131.40809 | 0.9724256 | 0.0054738  | 15.138   |
| gi 115552676 dbj AK232881.1 | skyblue       | 654.65054 | 37.149394 | 0.9564647 | 0.01083277 | 26.306   |
| gi 115552724 dbj AK232929.1 | purple        | 303.94901 | 75.318161 | 0.9844578 | 0.00232053 | 44.658   |
| gi 115552731 dbj AK232936.1 | violet        | 49.918088 | 8.6045821 | -0.957021 | 0.01062687 | 17.42    |
| gi 115552766 dbj AK239359.1 | darkorange    | 173.21945 | 20.870884 | 0.8501555 | 0.06804315 | 19.158   |
| gi 115552791 dbj AK239385.1 | black         | 722.17012 | 100.2467  | 0.9824864 | 0.00277493 | 17.748   |
| gi 115552842 dbj AK239436.1 | yellow        | 198.08664 | 89.366067 | 0.9033985 | 0.03551523 | 654.514  |
| gi 115552862 dbj AK239456.1 | navy          | 44.447228 | 20.747329 | 0.8519466 | 0.06684571 | 99.656   |
| gi 115552865 dbj AK239459.1 | yellow        | 223.34069 | 79.136542 | 0.8810003 | 0.04838878 | 302.608  |
| gi 115552884 dbj AK239478.1 | brown         | 351.76135 | 49.974873 | 0.7824708 | 0.11773506 | 43.284   |
| gi 115552903 dbj AK239497.1 | turquoise     | 348.45623 | 127.3445  | 0.8410021 | 0.07426466 | 93.74    |
| gi 115552915 dbj AK239509.1 | turquoise     | 322.88311 | 117.03605 | 0.8141244 | 0.09346998 | 23.386   |
| gi 115552930 dbj AK239524.1 | lightgreen    | 521.8447  | 35.970717 | 0.8909167 | 0.0425338  | 46.592   |
| gi 115552932 dbj AK239526.1 | yellow        | 274.33858 | 120.20836 | 0.9727702 | 0.00537178 | 16.896   |
| gi 115552944 dbj AK239538.1 | lightcyan     | 481.79086 | 58.871597 | 0.9890729 | 0.00136892 | 22.112   |
| gi 115552956 dbj AK239550.1 | salmon        | 209.56553 | 73.257644 | 0.9870203 | 0.00177167 | 14.654   |
| gi 115552967 dbj AK239553.1 | grey          | 493.80682 | 15.401154 | 0.9917099 | 0.00090496 | 3.938    |
| gi 115552977 dbj AK239563.1 | midnightblue  | 950.73351 | 74.535818 | 0.987659  | 0.00164268 | 70.788   |
| gi 115552989 dbj AK239575.1 | turquoise     | 901.04282 | 207.91034 | 0.9443834 | 0.01561293 | 43.926   |
| gi 115553011 dbj AK239597.1 | yellow        | 295.47776 | 128.42362 | 0.9892914 | 0.00132811 | 15.094   |

|                             |               |           |           |           |            |         |
|-----------------------------|---------------|-----------|-----------|-----------|------------|---------|
| gi 115553014 dbj AK239600.1 | turquoise     | 659.0049  | 178.55483 | 0.9034407 | 0.0354922  | 48.788  |
| gi 115553015 dbj AK239601.1 | blue          | 874.37973 | 133.50238 | 0.9665168 | 0.00731782 | 31.152  |
| gi 115553025 dbj AK239611.1 | turquoise     | 383.65084 | 59.835807 | 0.0713757 | 0.90919887 | 59.34   |
| gi 115553031 dbj AK239617.1 | green         | 778.7619  | 105.49305 | 0.9760188 | 0.00444192 | 11.966  |
| gi 115553034 dbj AK239620.1 | brown         | 822.96567 | 108.51197 | 0.939453  | 0.01772101 | 10.694  |
| gi 115553038 dbj AK239624.1 | paleturquoise | 176.30164 | 25.79111  | 0.9698647 | 0.00625135 | 216.782 |
| gi 115553041 dbj AK239627.1 | turquoise     | 296.392   | 109.51421 | 0.7618258 | 0.13443649 | 14.328  |
| gi 115553045 dbj AK239631.1 | brown         | 701.08599 | 132.37873 | 0.9883925 | 0.0014986  | 8.942   |
| gi 115553060 dbj AK239646.1 | turquoise     | 944.70426 | 221.53261 | 0.9688538 | 0.00656754 | 165.182 |
| gi 115553074 dbj AK239660.1 | brown         | 87.821007 | 8.7745791 | 0.4001959 | 0.50440304 | 27.808  |
| gi 115553082 dbj AK239668.1 | greenyellow   | 161.4821  | 18.965333 | 0.6851165 | 0.20178992 | 79.716  |
| gi 115553090 dbj AK239676.1 | red           | 767.45465 | 114.08828 | 0.9763724 | 0.00434428 | 23.138  |
| gi 115553091 dbj AK239677.1 | blue          | 979.03334 | 119.96301 | 0.9403144 | 0.01734646 | 20.93   |
| gi 115553103 dbj AK239689.1 | darkorange    | 167.55309 | 28.969838 | 0.9517376 | 0.01263508 | 50.106  |
| gi 115553107 dbj AK239693.1 | darkgreen     | 232.2132  | 42.852189 | 0.991037  | 0.00101726 | 45.844  |
| gi 115553121 dbj AK239707.1 | black         | 891.08782 | 103.38138 | 0.9887203 | 0.00143563 | 19.85   |
| gi 115553124 dbj AK239710.1 | black         | 648.00698 | 95.848508 | 0.9734834 | 0.00516268 | 3.632   |
| gi 115553140 dbj AK239726.1 | green         | 827.6487  | 109.35838 | 0.9834697 | 0.00254493 | 22.718  |
| gi 115553142 dbj AK239728.1 | purple        | 285.6935  | 77.62309  | 0.9921339 | 0.00083649 | 73.714  |
| gi 115553143 dbj AK239729.1 | yellow        | 195.34843 | 75.377804 | 0.8656799 | 0.05788897 | 11.824  |
| gi 115553145 dbj AK239731.1 | red           | 872.67918 | 126.51077 | 0.9976081 | 0.00014038 | 8.55    |
| gi 115553157 dbj AK239743.1 | red           | 932.04923 | 127.06527 | 0.9982108 | 9.08E-05   | 7.638   |
| gi 115553159 dbj AK239745.1 | skyblue       | 271.66104 | 29.989971 | 0.9107311 | 0.03158508 | 17.766  |
| gi 115553169 dbj AK232967.1 | lightgreen    | 275.80664 | 25.373288 | 0.8795516 | 0.04926392 | 67.084  |
| gi 115553171 dbj AK232969.1 | salmon        | 248.71657 | 67.402936 | 0.9676563 | 0.00694864 | 39.42   |
| gi 115553181 dbj AK232979.1 | blue          | 962.96339 | 137.216   | 0.9723874 | 0.00548515 | 19.366  |
| gi 115553189 dbj AK232987.1 | royalblue     | 619.42411 | 64.207283 | 0.9992246 | 2.59E-05   | 13.542  |
| gi 115553196 dbj AK232994.1 | darkturquoise | 138.67177 | 36.988387 | 0.9440789 | 0.01574058 | 312.066 |
| gi 115553202 dbj AK233000.1 | blue          | 593.02688 | 119.86648 | 0.9455746 | 0.01511677 | 56.898  |
| gi 115553207 dbj AK233005.1 | blue          | 799.88868 | 138.1317  | 0.9755803 | 0.004564   | 4.982   |
| gi 115553209 dbj AK233007.1 | red           | 921.04355 | 127.71555 | 0.9993342 | 2.06E-05   | 200.636 |
| gi 115553226 dbj AK233024.1 | turquoise     | 267.31666 | 93.883844 | 0.7377767 | 0.15469427 | 36.972  |
| gi 115553231 dbj AK233029.1 | turquoise     | 657.1307  | 180.53941 | 0.9099023 | 0.03202186 | 53.246  |
| gi 115553249 dbj AK233047.1 | blue          | 723.97217 | 137.35475 | 0.9777824 | 0.00396211 | 314.876 |
| gi 115553264 dbj AK233062.1 | pink          | 847.6046  | 146.29429 | 0.9951659 | 0.00040317 | 2.544   |
| gi 115553284 dbj AK233082.1 | paleturquoise | 141.21707 | 19.391028 | 0.9114881 | 0.03118781 | 7.634   |
| gi 115553328 dbj AK233126.1 | paleturquoise | 174.11173 | 24.675817 | 0.968834  | 0.00657379 | 40.426  |
| gi 115553344 dbj AK233142.1 | lightcyan     | 305.42222 | 53.752337 | 0.9736354 | 0.00511848 | 8.056   |
| gi 115553351 dbj AK233149.1 | magenta       | 423.27004 | 75.52335  | 0.9617724 | 0.00892058 | 14.668  |
| gi 115553356 dbj AK233154.1 | pink          | 833.19125 | 145.01647 | 0.9933919 | 0.00064419 | 4.222   |
| gi 115553369 dbj AK236572.1 | green         | 772.32441 | 113.30712 | 0.9939354 | 0.00056642 | 13.926  |
| gi 115553370 dbj AK236573.1 | black         | 810.81331 | 108.84444 | 0.9996706 | 7.18E-06   | 11.844  |
| gi 115553373 dbj AK236576.1 | turquoise     | 311.61126 | 114.85035 | 0.7405236 | 0.15233855 | 54.728  |
| gi 115553381 dbj AK236584.1 | midnightblue  | 880.07614 | 64.867663 | 0.9581743 | 0.01020363 | 19.168  |
| gi 115553384 dbj AK236587.1 | purple        | 276.4421  | 74.047871 | 0.9811087 | 0.00310809 | 235.772 |
| gi 115553397 dbj AK236600.1 | grey60        | 300.71578 | 65.706569 | 0.9879349 | 0.00158798 | 11.96   |
| gi 115553406 dbj AK236609.1 | yellow        | 281.27961 | 123.86282 | 0.9788894 | 0.00367034 | 12.642  |
| gi 115553415 dbj AK236618.1 | turquoise     | 245.72288 | 92.857388 | 0.7223416 | 0.16812384 | 20.314  |

|                             |               |           |           |           |            |         |
|-----------------------------|---------------|-----------|-----------|-----------|------------|---------|
| gi 115553434 dbj AK236637.1 | greenyellow   | 236.9933  | 37.708473 | 0.9719778 | 0.00560728 | 21.624  |
| gi 115553440 dbj AK236643.1 | turquoise     | 121.56954 | 37.189966 | 0.4422718 | 0.45582042 | 16.386  |
| gi 115553452 dbj AK236655.1 | midnightblue  | 938.93563 | 78.656214 | 0.9989192 | 4.26E-05   | 27.908  |
| gi 115553453 dbj AK236656.1 | brown         | 586.40068 | 119.34025 | 0.9727624 | 0.00537408 | 22.72   |
| gi 115553457 dbj AK236660.1 | black         | 817.62291 | 92.669796 | 0.9656174 | 0.00761358 | 17.412  |
| gi 115553468 dbj AK236671.1 | orange        | 343.67911 | 34.373785 | 0.977881  | 0.00393582 | 32.878  |
| gi 115553471 dbj AK236674.1 | midnightblue  | 923.87959 | 77.421979 | 0.9955601 | 0.0003549  | 25.398  |
| gi 115553478 dbj AK236681.1 | magenta       | 310.64332 | 81.860431 | 0.9868532 | 0.00180595 | 11.708  |
| gi 115553483 dbj AK236686.1 | purple        | 223.09216 | 50.549532 | 0.8896324 | 0.04327857 | 18.196  |
| gi 115553496 dbj AK236699.1 | blue          | 840.50487 | 150.04394 | 0.9953576 | 0.00037944 | 0.79    |
| gi 115553497 dbj AK236700.1 | green         | 905.44062 | 113.87848 | 0.9918353 | 0.00088452 | 41.898  |
| gi 115553505 dbj AK236708.1 | darkred       | 82.632982 | 16.361978 | 0.7238068 | 0.1668352  | 12.09   |
| gi 115553521 dbj AK236724.1 | turquoise     | 555.46681 | 149.7976  | 0.8750897 | 0.05199025 | 11.084  |
| gi 115553524 dbj AK236727.1 | salmon        | 158.71194 | 55.962773 | 0.9306049 | 0.0217147  | 11.184  |
| gi 115553527 dbj AK236730.1 | turquoise     | 474.02749 | 157.97822 | 0.8881561 | 0.04413963 | 69.25   |
| gi 115553540 dbj AK236743.1 | red           | 902.07225 | 125.17703 | 0.9952766 | 0.00038941 | 13.696  |
| gi 115553549 dbj AK236752.1 | darkorange    | 178.52709 | 19.347486 | 0.8340768 | 0.07908228 | 157.598 |
| gi 115553555 dbj AK236758.1 | pink          | 903.31158 | 149.81116 | 0.9999235 | 8.03E-07   | 21.228  |
| gi 115553566 dbj AK239753.1 | paleturquoise | 173.94898 | 25.787304 | 0.9765033 | 0.00430832 | 18.292  |
| gi 115553569 dbj AK239756.1 | orange        | 285.67102 | 19.462045 | 0.7910929 | 0.11095925 | 23.726  |
| gi 115553571 dbj AK239758.1 | black         | 882.68088 | 106.68126 | 0.9949471 | 0.00043084 | 19.42   |
| gi 115553590 dbj AK239777.1 | darkmagenta   | 73.369305 | 5.3581262 | 0.7634474 | 0.13310101 | 26.69   |
| gi 115553648 dbj AK239835.1 | greenyellow   | 181.67072 | 38.196985 | 0.9318572 | 0.02113362 | 7.45    |
| gi 115553654 dbj AK239841.1 | salmon        | 226.6611  | 71.006347 | 0.9789695 | 0.00364951 | 4.924   |
| gi 115553671 dbj AK239858.1 | black         | 842.01685 | 108.27889 | 0.9983756 | 7.86E-05   | 38.728  |
| gi 115553680 dbj AK239867.1 | lightcyan     | 323.44286 | 41.057401 | 0.9134114 | 0.03018577 | 3.828   |
| gi 115553700 dbj AK239887.1 | brown         | 741.37908 | 135.77867 | 0.9957641 | 0.00033073 | 12.45   |
| gi 115553703 dbj AK239890.1 | black         | 744.41755 | 100.32474 | 0.9829544 | 0.00266464 | 27.228  |
| gi 115553719 dbj AK239906.1 | midnightblue  | 694.69022 | 64.920246 | 0.9591652 | 0.00984469 | 117.038 |
| gi 115553747 dbj AK239934.1 | grey60        | 302.3134  | 66.971189 | 0.9922626 | 0.00081606 | 30.098  |
| gi 115553748 dbj AK239935.1 | salmon        | 205.36603 | 69.331145 | 0.9750223 | 0.00472095 | 40.856  |
| gi 115553757 dbj AK239944.1 | skyblue       | 485.42571 | 43.912914 | 0.996912  | 0.0002059  | 17.25   |
| gi 115553777 dbj AK236782.1 | pink          | 894.62975 | 149.62591 | 0.9996875 | 6.63E-06   | 1.412   |
| gi 115553782 dbj AK236787.1 | white         | 243.8461  | 17.047208 | -0.654458 | 0.23077229 | 11.376  |
| gi 115553811 dbj AK236816.1 | white         | 990.0018  | 40.411791 | 0.982728  | 0.0027178  | 2.84    |
| gi 115553814 dbj AK236819.1 | tan           | 82.26292  | 22.540669 | 0.7344439 | 0.15756648 | 36.212  |
| gi 115553831 dbj AK236836.1 | violet        | 757.38592 | 43.043359 | 0.9926597 | 0.0007541  | 19.978  |
| gi 115553846 dbj AK236851.1 | greenyellow   | 213.86994 | 37.679012 | 0.9406481 | 0.01720211 | 21.74   |
| gi 115553858 dbj AK236863.1 | salmon        | 98.885969 | 39.80335  | 0.85851   | 0.06251493 | 17.924  |
| gi 115553862 dbj AK236867.1 | magenta       | 226.35098 | 80.785733 | 0.9840591 | 0.00241026 | 6.466   |
| gi 115553894 dbj AK236899.1 | midnightblue  | 805.43922 | 74.779461 | 0.988385  | 0.00150004 | 8.348   |
| gi 115553962 dbj AK233171.1 | lightgreen    | 123.17666 | 15.8526   | 0.5940869 | 0.29079658 | 39.418  |
| gi 115553967 dbj AK233176.1 | tan           | 176.41965 | 34.552612 | 0.8777203 | 0.05037731 | 39.294  |
| gi 115554012 dbj AK233221.1 | violet        | 876.55176 | 46.724055 | 0.9952875 | 0.00038807 | 27.042  |
| gi 115554020 dbj AK233229.1 | yellow        | 242.01968 | 102.47793 | 0.9346872 | 0.01983948 | 4.58    |
| gi 115554022 dbj AK233231.1 | blue          | 394.42822 | 77.082095 | 0.8480237 | 0.06947699 | 320.59  |
| gi 115554075 dbj AK233284.1 | darkred       | 162.05446 | 38.443283 | 0.9413317 | 0.01690751 | 53.848  |
| gi 115554113 dbj AK233322.1 | orange        | 206.44821 | 36.210217 | 0.9785385 | 0.00376202 | 6.954   |

|                             |               |           |           |           |            |          |
|-----------------------------|---------------|-----------|-----------|-----------|------------|----------|
| gi 115554124 dbj AK233334.1 | darkgreen     | 166.25229 | 13.664977 | 0.6637125 | 0.22191054 | 224.934  |
| gi 115554126 dbj AK233336.1 | darkgrey      | 899.38893 | 52.368046 | 0.9912853 | 0.00097531 | 5.984    |
| gi 115554130 dbj AK233340.1 | salmon        | 236.77167 | 75.769327 | 0.9929563 | 0.00070888 | 31.4     |
| gi 115554133 dbj AK233343.1 | black         | 818.80107 | 103.58363 | 0.9892787 | 0.00133048 | 39.262   |
| gi 115554161 dbj AK239956.1 | yellow        | 161.04083 | 61.732211 | 0.8276705 | 0.08362107 | 31.54    |
| gi 115554180 dbj AK239975.1 | orange        | 454.82969 | 28.623033 | 0.9300087 | 0.02199315 | 14.426   |
| gi 115554213 dbj AK240008.1 | turquoise     | 913.76428 | 202.02055 | 0.9283212 | 0.02278738 | 19.874   |
| gi 115554214 dbj AK240009.1 | blue          | 972.23544 | 132.52648 | 0.9647489 | 0.00790285 | 5.6      |
| gi 115554223 dbj AK240018.1 | turquoise     | 385.5069  | 132.73867 | 0.8374585 | 0.07671805 | 4.216    |
| gi 115554227 dbj AK240022.1 | violet        | 986.38197 | 44.231485 | 0.9619895 | 0.008845   | 17.474   |
| gi 115554228 dbj AK240023.1 | yellow        | 293.71116 | 133.86998 | 0.9977322 | 0.00012959 | 8.846    |
| gi 115554247 dbj AK240042.1 | yellow        | 291.13572 | 130.99668 | 0.9931899 | 0.00067394 | 6.692    |
| gi 115554271 dbj AK240066.1 | white         | 233.15953 | 14.951233 | -0.756706 | 0.13867885 | 31.24    |
| gi 115554273 dbj AK240068.1 | darkorange    | 86.820207 | 13.13041  | 0.744038  | 0.1493401  | 14.578   |
| gi 115554282 dbj AK240077.1 | lightyellow   | 344.08922 | 51.819239 | 0.9546668 | 0.01150757 | 86.374   |
| gi 115554284 dbj AK240079.1 | midnightblue  | 909.62175 | 69.720767 | 0.9734216 | 0.00518068 | 7.382    |
| gi 115554299 dbj AK240094.1 | lightcyan     | 600.66347 | 42.48091  | 0.9003712 | 0.03718026 | 11.778   |
| gi 115554309 dbj AK240104.1 | darkred       | 175.11612 | 41.572279 | 0.970574  | 0.00603261 | 8.686    |
| gi 115554312 dbj AK240107.1 | grey60        | 303.45338 | 65.080445 | 0.9858067 | 0.0020255  | 125.76   |
| gi 115554314 dbj AK240109.1 | turquoise     | 972.87954 | 221.69907 | 0.9627126 | 0.00859474 | 53.156   |
| gi 115554351 dbj AK240146.1 | lightyellow   | 430.56469 | 59.348535 | 0.9818465 | 0.00292811 | 9.592    |
| gi 115554358 dbj AK233368.1 | skyblue       | 602.53537 | 39.028518 | 0.9692956 | 0.00642871 | 21.496   |
| gi 115554363 dbj AK233373.1 | midnightblue  | 903.29994 | 77.628114 | 0.99628   | 0.00027221 | 9.318    |
| gi 115554371 dbj AK233381.1 | darkmagenta   | 60.913006 | 2.7729453 | 0.727486  | 0.16361197 | 15.94    |
| gi 115554373 dbj AK233383.1 | yellow        | 303.2636  | 133.43758 | 0.9966065 | 0.00023718 | 9.506    |
| gi 115554409 dbj AK233419.1 | blue          | 842.17944 | 141.91557 | 0.9825297 | 0.00276467 | 1366.408 |
| gi 115554410 dbj AK233420.1 | yellow        | 292.86106 | 120.84279 | 0.9714359 | 0.00577025 | 73.478   |
| gi 115554413 dbj AK233423.1 | salmon        | 219.56089 | 76.874474 | 0.9969879 | 0.00019835 | 5.18     |
| gi 115554415 dbj AK233425.1 | turquoise     | 379.41723 | 107.95749 | 0.7581209 | 0.13750241 | 10.44    |
| gi 115554455 dbj AK233465.1 | yellow        | 306.85487 | 131.02737 | 0.9916412 | 0.00091622 | 8.352    |
| gi 115554459 dbj AK233469.1 | lightcyan     | 401.98105 | 58.548906 | 0.9936291 | 0.00060985 | 14.114   |
| gi 115554528 dbj AK233538.1 | grey60        | 298.90766 | 66.183078 | 0.990116  | 0.00117784 | 140.376  |
| gi 115554532 dbj AK233542.1 | violet        | 101.54477 | 6.0762665 | -0.594351 | 0.29052633 | 250.42   |
| gi 115554540 dbj AK233550.1 | white         | 941.00732 | 41.167011 | 0.976999  | 0.00417302 | 14.934   |
| gi 115554557 dbj AK236967.1 | turquoise     | 427.96754 | 142.73559 | 0.8477714 | 0.06964727 | 3.906    |
| gi 115554560 dbj AK236970.1 | brown         | 258.87954 | 40.255424 | 0.7276863 | 0.16343699 | 17.232   |
| gi 115554563 dbj AK236973.1 | purple        | 197.6118  | 43.729645 | 0.8645361 | 0.05861946 | 40.214   |
| gi 115554566 dbj AK236976.1 | green         | 712.35769 | 107.12704 | 0.9814321 | 0.00302877 | 46.522   |
| gi 115554588 dbj AK236998.1 | darkgrey      | 767.80251 | 48.254399 | 0.973971  | 0.00502131 | 2.726    |
| gi 115554610 dbj AK237020.1 | turquoise     | 511.3545  | 152.62961 | 0.8610071 | 0.06089116 | 7.622    |
| gi 115554627 dbj AK237038.1 | navy          | 174.76908 | 37.394996 | 0.9578355 | 0.01032732 | 6.38     |
| gi 115554633 dbj AK237044.1 | tan           | 247.49902 | 41.122082 | 0.9376081 | 0.0185319  | 8.176    |
| gi 115554649 dbj AK237060.1 | tan           | 168.56296 | 31.610337 | 0.8594789 | 0.06188328 | 13.824   |
| gi 115554695 dbj AK237106.1 | green         | 772.71074 | 78.832789 | 0.9114309 | 0.03121774 | 24.91    |
| gi 115554713 dbj AK237124.1 | greenyellow   | 77.055637 | 9.9452314 | 0.4918273 | 0.40003831 | 50.328   |
| gi 115554725 dbj AK237136.1 | tan           | 168.64141 | 27.909668 | 0.8278082 | 0.08352271 | 9.648    |
| gi 115554740 dbj AK237151.1 | brown         | 615.94428 | 112.25808 | 0.9595816 | 0.00969509 | 16.372   |
| gi 115554764 dbj AK233576.1 | paleturquoise | 166.49272 | 20.092821 | 0.9057237 | 0.034253   | 2.658    |

|                             |               |           |           |           |            |         |
|-----------------------------|---------------|-----------|-----------|-----------|------------|---------|
| gi 115554769 dbj AK233581.1 | brown         | 789.83949 | 129.42383 | 0.980579  | 0.00323945 | 7.876   |
| gi 115554826 dbj AK233638.1 | navy          | 175.92025 | 37.182688 | 0.941622  | 0.01678294 | 42.316  |
| gi 115554840 dbj AK233652.1 | black         | 617.76979 | 94.264228 | 0.9695948 | 0.00633526 | 29.622  |
| gi 115554857 dbj AK233669.1 | lightgreen    | 565.08101 | 37.86175  | 0.9375784 | 0.01854504 | 352.272 |
| gi 115554861 dbj AK233673.1 | grey60        | 265.5928  | 54.729952 | 0.9499561 | 0.01333746 | 28.8    |
| gi 115554866 dbj AK233678.1 | turquoise     | 238.60203 | 62.59885  | 0.6241185 | 0.26047377 | 13.16   |
| gi 115554868 dbj AK233680.1 | blue          | 360.55056 | 81.622197 | 0.8611881 | 0.06077403 | 6.348   |
| gi 115554875 dbj AK233687.1 | violet        | 79.485894 | 7.520462  | -0.827101 | 0.08402847 | 13.248  |
| gi 115554899 dbj AK233711.1 | turquoise     | 588.64963 | 178.27076 | 0.9267509 | 0.02353463 | 24.932  |
| gi 115554918 dbj AK233730.1 | navy          | 114.50055 | 40.779505 | 0.9673587 | 0.00704446 | 11.512  |
| gi 115554929 dbj AK233741.1 | greenyellow   | 121.41954 | 21.314593 | 0.824432  | 0.08594501 | 11.672  |
| gi 115554960 dbj AK240159.1 | navy          | 165.496   | 36.148847 | 0.9690351 | 0.00651044 | 6.312   |
| gi 115554973 dbj AK240172.1 | lightcyan     | 253.34906 | 35.421202 | 0.8811035 | 0.04832663 | 37.31   |
| gi 115554982 dbj AK240181.1 | darkred       | 153.52041 | 37.353805 | 0.9333926 | 0.0204282  | 159.984 |
| gi 115554984 dbj AK240183.1 | brown         | 809.99765 | 120.46326 | 0.9612728 | 0.00909535 | 14.342  |
| gi 115555002 dbj AK240201.1 | turquoise     | 302.30159 | 115.92259 | 0.7575341 | 0.13798989 | 16.394  |
| gi 115555012 dbj AK240211.1 | greenyellow   | 155.57795 | 21.337355 | 0.7767329 | 0.12231038 | 30.844  |
| gi 115555020 dbj AK240219.1 | turquoise     | 928.83216 | 216.92851 | 0.9589029 | 0.0099393  | 6.28    |
| gi 115555021 dbj AK240220.1 | brown         | 84.321826 | 11.707869 | 0.4551757 | 0.44113773 | 49.464  |
| gi 115555035 dbj AK240234.1 | turquoise     | 275.11055 | 56.859084 | -0.146456 | 0.81419562 | 12.592  |
| gi 115555041 dbj AK240240.1 | green         | 699.67619 | 96.597578 | 0.9577816 | 0.01034706 | 29.136  |
| gi 115555043 dbj AK240242.1 | darkturquoise | 237.61824 | 44.160373 | 0.9829301 | 0.00267032 | 8.414   |
| gi 115555058 dbj AK240257.1 | darkred       | 170.89338 | 41.37103  | 0.972788  | 0.00536653 | 23.716  |
| gi 115555063 dbj AK240262.1 | blue          | 645.63776 | 136.8715  | 0.9759588 | 0.00445857 | 27.836  |
| gi 115555072 dbj AK240271.1 | turquoise     | 190.81992 | 71.652736 | 0.5515383 | 0.33519538 | 15.072  |
| gi 115555076 dbj AK240275.1 | darkgrey      | 861.75597 | 49.451176 | 0.9794102 | 0.00353562 | 9.754   |
| gi 115555097 dbj AK240296.1 | brown         | 805.07013 | 128.3204  | 0.9785702 | 0.00375369 | 66.95   |
| gi 115555127 dbj AK240327.1 | navy          | 166.84219 | 35.908055 | 0.9678123 | 0.0068986  | 3.436   |
| gi 115555129 dbj AK240329.1 | turquoise     | 573.32568 | 149.04053 | 0.8713678 | 0.05429956 | 89.024  |
| gi 115555138 dbj AK240338.1 | yellow        | 256.71228 | 115.6948  | 0.9639561 | 0.00816996 | 8.99    |
| gi 115555145 dbj AK240345.1 | black         | 703.18887 | 94.217468 | 0.9701379 | 0.00616679 | 97.352  |
| gi 115555150 dbj AK233765.1 | lightyellow   | 489.40774 | 63.989485 | 0.9985239 | 6.81E-05   | 46.042  |
| gi 115555155 dbj AK233770.1 | turquoise     | 956.91527 | 219.16917 | 0.9587889 | 0.00998051 | 21.938  |
| gi 115555162 dbj AK233777.1 | violet        | 189.26677 | 5.1725826 | -0.024497 | 0.96881271 | 117.69  |
| gi 115555163 dbj AK233778.1 | yellow        | 275.5889  | 109.27816 | 0.9489619 | 0.01373482 | 36.06   |
| gi 115555187 dbj AK233802.1 | greenyellow   | 226.69553 | 38.089234 | 0.9675575 | 0.00698041 | 9.236   |
| gi 115555188 dbj AK233803.1 | violet        | 72.193817 | 5.2621784 | -0.551535 | 0.33519884 | 11.53   |
| gi 115555205 dbj AK233820.1 | pink          | 813.24552 | 138.02737 | 0.9834617 | 0.00254676 | 5.25    |
| gi 115555219 dbj AK233834.1 | turquoise     | 338.70983 | 121.77198 | 0.7993513 | 0.10458398 | 5.984   |
| gi 115555288 dbj AK233903.1 | turquoise     | 577.25633 | 140.29942 | 0.8335941 | 0.07942153 | 50.144  |
| gi 115555322 dbj AK233937.1 | darkorange    | 145.62895 | 30.710214 | 0.9615153 | 0.00901038 | 10.84   |
| gi 115555347 dbj AK233960.1 | salmon        | 220.07039 | 76.758292 | 0.996812  | 0.00021598 | 1.548   |
| gi 115555353 dbj AK233966.1 | darkgreen     | 118.36683 | 11.874259 | 0.5955899 | 0.28925834 | 18.308  |
| gi 115555420 dbj AK234033.1 | turquoise     | 198.82433 | 72.938105 | 0.5470393 | 0.33998209 | 24.84   |
| gi 115555451 dbj AK234064.1 | greenyellow   | 176.27534 | 27.791886 | 0.8797047 | 0.04917122 | 24.51   |
| gi 115555475 dbj AK234088.1 | royalblue     | 618.55907 | 64.313537 | 0.9995581 | 1.11E-05   | 16.364  |
| gi 115555495 dbj AK234108.1 | violet        | 862.12141 | 46.630804 | 0.9976891 | 0.00013331 | 13.934  |
| gi 115555513 dbj AK234126.1 | pink          | 583.45176 | 113.0345  | 0.9423523 | 0.01647084 | 45.134  |



|                                 |               |           |           |           |            |         |
|---------------------------------|---------------|-----------|-----------|-----------|------------|---------|
| gi 115555517 dbj AK234130.1     | violet        | 603.24183 | 36.35663  | 0.9761113 | 0.00441632 | 1.904   |
| gi 115555541 dbj AK237173.1     | turquoise     | 276.79396 | 102.63346 | 0.7198442 | 0.17032691 | 80.362  |
| gi 115555553 dbj AK237185.1     | turquoise     | 822.56274 | 191.36607 | 0.9157437 | 0.02898483 | 46.472  |
| gi 115555561 dbj AK237193.1     | darkred       | 187.02161 | 39.397546 | 0.938868  | 0.01797684 | 6.44    |
| gi 115555588 dbj AK237220.1     | turquoise     | 343.26973 | 59.274364 | -0.08755  | 0.88867026 | 8.828   |
| gi 115555616 dbj AK237249.1     | lightcyan     | 152.64978 | 26.941206 | 0.7760997 | 0.12281846 | 2.488   |
| gi 115555619 dbj AK237252.1     | darkturquoise | 159.09586 | 38.648327 | 0.9489711 | 0.01373112 | 194.276 |
| gi 115555627 dbj AK237260.1     | navy          | 909.36003 | 18.795538 | -0.07922  | 0.89923914 | 2.624   |
| gi 115555639 dbj AK237272.1     | red           | 837.64075 | 123.35965 | 0.9925321 | 0.00077383 | 91.996  |
| gi 115555653 dbj AK237286.1     | tan           | 206.14276 | 30.80858  | 0.8618771 | 0.06032863 | 20.842  |
| gi 115555661 dbj AK237294.1     | greenyellow   | 171.02273 | 29.212303 | 0.8264058 | 0.08452633 | 14.918  |
| gi 115555675 dbj AK237308.1     | green         | 923.03101 | 108.52348 | 0.9798479 | 0.00342372 | 18.198  |
| gi 115555681 dbj AK237314.1     | darkmagenta   | 98.466885 | 10.189783 | 0.951665  | 0.01266348 | 21.736  |
| gi 115555693 dbj AK237326.1     | darkgrey      | 895.48788 | 50.004643 | 0.9816584 | 0.00297367 | 11.514  |
| gi 115555721 dbj AK234149.1     | pink          | 970.52074 | 143.65031 | 0.99092   | 0.00103721 | 7.08    |
| gi 116175276 ref NM_001077227.1 | skyblue       | 508.97655 | 44.024736 | 0.9972008 | 0.00017771 | 8.3     |
| gi 117661185 gb DQ629176.1      | brown         | 724.85245 | 119.6258  | 0.9607831 | 0.0092677  | 391.506 |
| gi 118403765 ref NM_001078687.1 | darkgrey      | 666.90451 | 38.890262 | 0.9299623 | 0.02201486 | 153.78  |
| gi 118403821 ref NM_001078679.1 | blue          | 977.7803  | 130.91986 | 0.9616685 | 0.00895682 | 5.358   |
| gi 118403857 ref NM_001078670.1 | orange        | 145.56174 | 27.978185 | 0.9192314 | 0.02721852 | 19.718  |
| gi 118403869 ref NM_001078669.1 | lightyellow   | 572.70759 | 53.184508 | 0.9593894 | 0.00976405 | 15.738  |
| gi 118403911 ref NM_001078662.1 | navy          | 70.202723 | 32.960442 | 0.9476067 | 0.01428252 | 43.528  |
| gi 119310177 ref NM_001032376.2 | turquoise     | 798.03513 | 182.53246 | 0.8930182 | 0.04132412 | 16.226  |
| gi 1245714 gb S80644.1          | brown         | 680.79368 | 133.4887  | 0.9968989 | 0.00020721 | 6.476   |
| gi 125490322 ref NM_213824.2    | red           | 688.9285  | 108.10166 | 0.9654498 | 0.00766913 | 6.396   |
| gi 125630297 ref NM_001005152.2 | red           | 976.68448 | 119.4312  | 0.9849539 | 0.00221049 | 9.006   |
| gi 125630333 ref NM_214068.2    | green         | 937.51192 | 113.42087 | 0.9923058 | 0.00080925 | 9.876   |
| gi 139530445 gb EF486522.1      | turquoise     | 783.14382 | 186.59437 | 0.9236352 | 0.02504005 | 130.098 |
| gi 145279656 ref NM_214014.2    | lightcyan     | 335.38371 | 55.661648 | 0.983059  | 0.0026402  | 6.29    |
| gi 146198449 dbj AB292846.1     | purple        | 302.04992 | 78.542565 | 0.9939988 | 0.00055757 | 107.41  |
| gi 146741279 dbj AB271920.1     | red           | 923.25583 | 123.81538 | 0.9928517 | 0.00072472 | 4.388   |
| gi 147899058 ref NM_001097509.1 | magenta       | 200.85631 | 76.275814 | 0.9696809 | 0.00630845 | 178.64  |
| gi 147900046 ref NM_001097474.1 | purple        | 241.59099 | 49.791387 | 0.8912395 | 0.04234728 | 553.29  |
| gi 147900501 ref NM_001097506.1 | green         | 774.96664 | 108.25445 | 0.9826289 | 0.00274119 | 23.364  |
| gi 147902484 ref NM_001097419.1 | yellow        | 259.13811 | 102.76028 | 0.9342677 | 0.02002964 | 46.69   |
| gi 147906088 ref NM_213946.2    | blue          | 908.64443 | 140.25975 | 0.9790387 | 0.00363154 | 144.588 |
| gi 148222423 ref NM_001097426.1 | turquoise     | 818.87143 | 191.90046 | 0.9211051 | 0.02628451 | 12.77   |
| gi 148222590 ref NM_001097486.1 | yellow        | 311.61992 | 125.94518 | 0.9824534 | 0.00278276 | 103.824 |
| gi 148223598 ref NM_001097476.1 | greenyellow   | 192.19843 | 38.290298 | 0.9513181 | 0.01279937 | 60.608  |
| gi 148224637 ref NM_001097469.1 | darkturquoise | 117.90953 | 35.810322 | 0.9322479 | 0.02095337 | 33.922  |
| gi 148225749 ref NM_001097504.1 | royalblue     | 392.92729 | 50.814292 | 0.9457363 | 0.01504983 | 9.998   |
| gi 148228021 ref NM_001097420.1 | blue          | 815.6891  | 151.55949 | 0.9981466 | 9.58E-05   | 5.734   |
| gi 148229131 ref NM_001097428.1 | turquoise     | 257.52999 | 52.472426 | -0.277928 | 0.6507409  | 9.67    |
| gi 148233142 ref NM_001097435.1 | royalblue     | 368.08566 | 47.961604 | 0.9328076 | 0.02069606 | 24.026  |
| gi 148233297 ref NM_001097485.1 | green         | 964.24821 | 109.55811 | 0.9830601 | 0.00263994 | 26.374  |
| gi 148233557 ref NM_001097460.1 | green         | 406.10766 | 67.699234 | 0.8778746 | 0.05028319 | 24.042  |
| gi 148234109 ref NM_001093735.1 | darkorange    | 135.04008 | 34.629699 | 0.9907435 | 0.00106759 | 19.944  |
| gi 148235350 ref NM_001097475.1 | green         | 815.00071 | 112.10447 | 0.9904587 | 0.00111718 | 105.43  |

|                                 |               |           |           |           |            |         |
|---------------------------------|---------------|-----------|-----------|-----------|------------|---------|
| gi 148237281 ref NM_001097478.1 | turquoise     | 342.17719 | 123.61717 | 0.8230467 | 0.08694502 | 211.854 |
| gi 149364039 gb EF468461.1      | red           | 740.53342 | 113.5805  | 0.975552  | 0.00457194 | 3.644   |
| gi 149944498 ref NM_214343.2    | green         | 970.94358 | 101.94656 | 0.9657349 | 0.00757472 | 19.014  |
| gi 149944608 ref NM_001001546.2 | lightgreen    | 393.33861 | 35.402017 | 0.8787854 | 0.04972879 | 2.846   |
| gi 150246527 ref NM_001044575.2 | black         | 903.39617 | 101.74859 | 0.9852702 | 0.00214125 | 74.618  |
| gi 153792275 ref NM_001097505.1 | darkturquoise | 121.85393 | 34.545422 | 0.9210927 | 0.02629066 | 34.57   |
| gi 153792324 ref NM_001097517.1 | brown         | 790.80158 | 127.3891  | 0.9759484 | 0.00446145 | 7.696   |
| gi 153792599 ref NM_001099930.1 | turquoise     | 880.89342 | 192.54857 | 0.9129206 | 0.03044049 | 2.626   |
| gi 154147629 ref NM_001100190.1 | darkgreen     | 161.27607 | 16.449341 | 0.6840388 | 0.20279019 | 38.082  |
| gi 154147643 ref NM_001100193.1 | tan           | 241.51649 | 40.223415 | 0.9269631 | 0.02343316 | 23.356  |
| gi 156120135 ref NM_001101827.1 | red           | 965.55813 | 121.30966 | 0.9882907 | 0.00151834 | 31.556  |
| gi 156120149 ref NM_001101823.1 | orange        | 177.23384 | 33.104924 | 0.948152  | 0.01406131 | 2.634   |
| gi 156120151 ref NM_001101824.1 | turquoise     | 742.494   | 205.0379  | 0.9653796 | 0.00769244 | 2.194   |
| gi 156123600 gb EU030283.2      | brown         | 678.04408 | 134.75677 | 0.9974461 | 0.00015487 | 13.994  |
| gi 156151354 ref NM_001037146.2 | paleturquoise | 178.56291 | 24.771519 | 0.954446  | 0.01159133 | 38.642  |
| gi 157427686 ref NM_214374.2    | magenta       | 333.83057 | 82.886421 | 0.9888691 | 0.00140736 | 899.148 |
| gi 157427714 ref NM_001105294.1 | pink          | 897.1293  | 148.6751  | 0.9983702 | 7.90E-05   | 3.52    |
| gi 157427721 ref NM_001105299.1 | brown         | 682.07762 | 129.9874  | 0.9841301 | 0.00239418 | 37.688  |
| gi 157427723 ref NM_001105300.1 | navy          | 40.012119 | 9.1837642 | 0.5741041 | 0.3114474  | 72.924  |
| gi 157427727 ref NM_001105302.1 | turquoise     | 1012.9004 | 216.01669 | 0.9427656 | 0.01629506 | 4.48    |
| gi 157427731 ref NM_001105304.1 | royalblue     | 569.14135 | 63.229737 | 0.9957352 | 0.00033412 | 36.054  |
| gi 157427747 ref NM_001105296.1 | blue          | 666.43909 | 131.0639  | 0.9661508 | 0.00743771 | 9.986   |
| gi 158262680 ref NM_001109947.1 | brown         | 642.1091  | 115.89411 | 0.9574509 | 0.01046833 | 9.788   |
| gi 158631261 ref NM_001099936.1 | blue          | 674.2153  | 120.7246  | 0.9482039 | 0.0140403  | 32.74   |
| gi 160420270 ref NM_001044582.1 | black         | 836.336   | 104.57196 | 0.9913405 | 0.00096608 | 39.268  |
| gi 162139822 ref NM_001111257.1 | red           | 932.29467 | 125.79665 | 0.996146  | 0.00028705 | 27.128  |
| gi 162287024 ref NM_001111258.1 | grey          | 486.19051 | 15.720181 | 0.9961612 | 0.00028535 | 10.246  |
| gi 162951810 ref NM_001112690.1 | purple        | 288.94918 | 79.982121 | 0.9993969 | 1.78E-05   | 11.448  |
| gi 16304807 emb AJ416019.1      | turquoise     | 867.85056 | 216.41871 | 0.967387  | 0.00703533 | 64.818  |
| gi 163115794 gb EU009401.2      | blue          | 908.90838 | 150.44045 | 0.9955576 | 0.00035519 | 13.862  |
| gi 163310772 ref NM_001097521.2 | tan           | 168.50913 | 37.164951 | 0.9047647 | 0.03477182 | 36.278  |
| gi 163915140 ref NM_001113047.1 | navy          | 73.409063 | 8.2794306 | -0.683235 | 0.20353683 | 200.664 |
| gi 163915152 ref NM_001113053.1 | royalblue     | 634.58257 | 62.571431 | 0.9940016 | 0.00055718 | 3.93    |
| gi 164518957 ref NM_001113287.1 | navy          | 760.14656 | 16.356755 | -0.153399 | 0.80545537 | 308.13  |
| gi 164664445 ref NM_001113439.1 | lightcyan     | 264.17425 | 45.129975 | 0.9326086 | 0.02078743 | 47.692  |
| gi 164664451 ref NM_001113442.1 | midnightblue  | 1000.0149 | 70.778308 | 0.9762357 | 0.00438194 | 20.97   |
| gi 164664453 ref NM_001113443.1 | turquoise     | 572.65302 | 177.90833 | 0.9367252 | 0.01892405 | 25.266  |
| gi 164664455 ref NM_001113444.1 | darkturquoise | 188.60458 | 41.987838 | 0.9711636 | 0.00585272 | 83.23   |
| gi 165973425 ref NM_001113706.1 | lightgreen    | 128.70362 | 17.503804 | 0.6921972 | 0.19525303 | 54.846  |
| gi 165973431 ref NM_001113698.1 | lightcyan     | 218.90161 | 37.942368 | 0.891758  | 0.04204822 | 32.388  |
| gi 166796042 ref NM_001114275.1 | black         | 504.44382 | 78.004435 | 0.9286429 | 0.02263525 | 4.098   |
| gi 166796054 ref NM_001114281.1 | lightcyan     | 403.29224 | 58.073673 | 0.9898731 | 0.00122149 | 6.068   |
| gi 167908788 ref NM_001114675.1 | turquoise     | 925.57694 | 215.87892 | 0.9566851 | 0.01075096 | 18.742  |
| gi 167908792 ref NM_001114670.1 | turquoise     | 286.50646 | 105.26256 | 0.7363592 | 0.15591392 | 23.504  |
| gi 167908794 ref NM_001114671.1 | turquoise     | 351.19606 | 61.621815 | -0.031295 | 0.9601605  | 44.126  |
| gi 171905894 gb EU561660.1      | turquoise     | 620.51703 | 162.43046 | 0.8623086 | 0.06005021 | 367.422 |
| gi 172072681 ref NM_001122994.1 | royalblue     | 547.4494  | 62.311426 | 0.9923832 | 0.00079706 | 72.584  |
| gi 172073180 ref NM_001099931.1 | pink          | 957.01097 | 146.6234  | 0.9952485 | 0.00039289 | 17.638  |

|                                 |               |           |           |           |            |           |
|---------------------------------|---------------|-----------|-----------|-----------|------------|-----------|
| gi 178056465 ref NM_001123083.1 | brown         | 593.91266 | 119.91442 | 0.9713445 | 0.0057979  | 9.876     |
| gi 178056481 ref NM_001123135.1 | darkgrey      | 959.24191 | 51.311628 | 0.985663  | 0.00205628 | 6.244     |
| gi 178056483 ref NM_001123101.1 | black         | 698.09098 | 103.32771 | 0.9887403 | 0.00143183 | 34.612    |
| gi 178056487 ref NM_001123204.1 | turquoise     | 354.14228 | 112.66902 | 0.7390376 | 0.15361162 | 28.176    |
| gi 178056503 ref NM_001123076.1 | greenyellow   | 82.280878 | 12.846718 | 0.4249105 | 0.47573912 | 829.288   |
| gi 178056523 ref NM_001123127.1 | grey60        | 315.04584 | 69.206442 | 0.9992449 | 2.49E-05   | 5.114     |
| gi 178056529 ref NM_001123203.1 | yellow        | 309.87416 | 121.34568 | 0.9732352 | 0.00523513 | 10.174    |
| gi 178056549 ref NM_001123162.1 | pink          | 897.81561 | 146.25528 | 0.9950693 | 0.00041532 | 1.79      |
| gi 178056555 ref NM_001123148.1 | darkturquoise | 231.07641 | 36.328035 | 0.9318867 | 0.02112    | 29.802    |
| gi 178056566 ref NM_001123160.1 | darkorange    | 109.89605 | 18.307581 | 0.8149394 | 0.09286795 | 51.46     |
| gi 178056595 ref NM_001123136.1 | grey60        | 299.00251 | 63.540118 | 0.9805779 | 0.00323974 | 39.052    |
| gi 178056622 ref NM_001123213.1 | blue          | 907.59156 | 150.43115 | 0.9955717 | 0.00035351 | 47.842    |
| gi 178056662 ref NM_001123124.1 | royalblue     | 474.48524 | 56.885254 | 0.9720159 | 0.00559588 | 4.5       |
| gi 178056668 ref NM_001123099.1 | brown         | 683.51166 | 134.03451 | 0.9951781 | 0.00040165 | 87.994    |
| gi 178056676 ref NM_001123078.1 | magenta       | 264.7038  | 84.560275 | 0.9949961 | 0.00042459 | 279.664   |
| gi 178056709 ref NM_001123194.1 | skyblue       | 700.15653 | 34.426755 | 0.9387365 | 0.01803453 | 6.224     |
| gi 178056815 ref NM_001123159.1 | violet        | 43.268567 | 9.319737  | -0.928548 | 0.02268018 | 16.202    |
| gi 178056859 ref NM_001123091.1 | lightcyan     | 622.77357 | 50.551302 | 0.9398233 | 0.01755971 | 33.896    |
| gi 178056883 ref NM_001123198.1 | blue          | 830.01594 | 148.85522 | 0.994369  | 0.00050681 | 8.504     |
| gi 178057054 ref NM_001123079.1 | darkturquoise | 240.92448 | 40.022155 | 0.9561786 | 0.01093925 | 25.056    |
| gi 178057066 ref NM_001123096.1 | darkorange    | 138.02542 | 28.961233 | 0.949599  | 0.01347975 | 43.83     |
| gi 178057124 ref NM_001123104.1 | blue          | 371.19186 | 77.10009  | 0.8510787 | 0.06742514 | 22.016    |
| gi 178057176 ref NM_001123090.1 | turquoise     | 983.51425 | 225.39909 | 0.9692148 | 0.00645402 | 18.672    |
| gi 178057317 ref NM_001123205.1 | darkgreen     | 233.69738 | 42.022009 | 0.9862167 | 0.00193848 | 57.096    |
| gi 187672044 gb EU650276.1      | magenta       | 444.26856 | 73.377688 | 0.953907  | 0.0117967  | 18.88     |
| gi 190360618 ref NM_001128433.1 | lightcyan     | 568.46889 | 53.639889 | 0.959022  | 0.0098963  | 97.63     |
| gi 190360620 ref NM_001128486.1 | lightyellow   | 279.14128 | 50.353247 | 0.9434866 | 0.01598987 | 6.392     |
| gi 190360638 ref NM_001128469.1 | lightcyan     | 272.51952 | 40.708078 | 0.9060486 | 0.03407781 | 24.934    |
| gi 190360656 ref NM_001128470.1 | lightcyan     | 215.46066 | 37.710494 | 0.8750073 | 0.05204107 | 112.022   |
| gi 1912 emb X07617.1            | lightyellow   | 530.77171 | 53.982422 | 0.9630172 | 0.00849004 | 9.726     |
| gi 1920 emb X15073.1            | midnightblue  | 903.45757 | 76.965821 | 0.9945546 | 0.00048198 | 13.336    |
| gi 194018685 ref NM_001129963.1 | turquoise     | 278.91866 | 87.678458 | 0.6627361 | 0.22284102 | 425.022   |
| gi 194018717 ref NM_001129954.1 | black         | 637.37659 | 90.172364 | 0.9609343 | 0.00921437 | 1460.098  |
| gi 194018721 ref NM_001129949.1 | violet        | 46.062555 | 9.0899648 | -0.981551 | 0.00299976 | 33475.862 |
| gi 194033408 ref XM_001926440.1 | brown         | 680.29691 | 132.47491 | 0.9935292 | 0.00062424 | 102.552   |
| gi 194033418 ref XM_001924233.1 | orange        | 333.05997 | 34.596077 | 0.9820826 | 0.00287129 | 10.99     |
| gi 194033446 ref XM_001927265.1 | turquoise     | 996.71291 | 209.44988 | 0.9336394 | 0.02031554 | 5.184     |
| gi 194033502 ref XM_001926129.1 | yellow        | 310.75    | 130.66756 | 0.9920962 | 0.00084251 | 5.458     |
| gi 194033586 ref XM_001929183.1 | greenyellow   | 121.53395 | 20.983117 | 0.8327576 | 0.08001049 | 18.302    |
| gi 194033590 ref XM_001929195.1 | lightyellow   | 589.93126 | 58.63094  | 0.9771243 | 0.00413903 | 114.69    |
| gi 194033594 ref XM_001927795.1 | turquoise     | 975.0972  | 217.96703 | 0.9528098 | 0.01221836 | 8.902     |
| gi 194033596 ref XM_001927813.1 | brown         | 143.72511 | 14.430694 | 0.416073  | 0.48594818 | 5.77      |
| gi 194033615 ref XM_001924714.1 | darkorange    | 158.13059 | 31.5298   | 0.9692818 | 0.00643304 | 4.156     |
| gi 194033638 ref XM_001927936.1 | turquoise     | 579.50064 | 178.22831 | 0.941561  | 0.01680908 | 35.348    |
| gi 194033649 ref XM_001925294.1 | darkred       | 188.75445 | 32.828823 | 0.8843067 | 0.04641006 | 8.56      |
| gi 194033677 ref XM_001928828.1 | turquoise     | 211.1081  | 80.681851 | 0.6710244 | 0.21497731 | 16.744    |
| gi 194033685 ref XM_001926077.1 | darkturquoise | 152.23752 | 40.714516 | 0.9614174 | 0.00904466 | 37.176    |
| gi 194033718 ref XM_001926719.1 | turquoise     | 430.95405 | 59.722974 | 0.084581  | 0.89243663 | 15.306    |

|                                 |               |           |           |           |            |         |
|---------------------------------|---------------|-----------|-----------|-----------|------------|---------|
| gi 194033751 ref XM_001924525.1 | pink          | 976.83549 | 142.41426 | 0.9890989 | 0.00136404 | 4.278   |
| gi 194033753 ref XM_001924715.1 | purple        | 258.58814 | 73.740306 | 0.983075  | 0.00263646 | 23.472  |
| gi 194033755 ref XM_001924851.1 | navy          | 84.718662 | 28.437762 | 0.9035437 | 0.03543596 | 30.258  |
| gi 194033859 ref XM_001927866.1 | darkgreen     | 266.9809  | 41.291621 | 0.985373  | 0.00211891 | 185.242 |
| gi 194033888 ref XM_001925347.1 | turquoise     | 918.14224 | 210.70592 | 0.9522522 | 0.01243451 | 100.61  |
| gi 194033910 ref XM_001928928.1 | grey60        | 313.35903 | 68.773426 | 0.9980927 | 1.00E-04   | 47.064  |
| gi 194033964 ref XM_001925719.1 | paleturquoise | 175.11129 | 23.025982 | 0.9344004 | 0.01996943 | 3.716   |
| gi 194034011 ref XM_001927812.1 | brown         | 577.79684 | 113.66547 | 0.9589533 | 0.0099211  | 25.542  |
| gi 194034018 ref XM_001925500.1 | turquoise     | 882.37402 | 218.13269 | 0.9702442 | 0.00613399 | 18.238  |
| gi 194034042 ref XM_001925859.1 | darkturquoise | 145.81699 | 39.212074 | 0.9513418 | 0.01279006 | 15.046  |
| gi 194034126 ref XM_001926626.1 | blue          | 964.97775 | 144.80087 | 0.9853072 | 0.00213319 | 10.3    |
| gi 194034144 ref XM_001926437.1 | turquoise     | 334.01254 | 99.070598 | 0.7401442 | 0.15266332 | 8.272   |
| gi 194034148 ref XM_001924679.1 | turquoise     | 854.60376 | 213.90902 | 0.9554852 | 0.01119875 | 40.152  |
| gi 194034158 ref XM_001927669.1 | green         | 864.51866 | 108.42914 | 0.981207  | 0.0030839  | 22.924  |
| gi 194034162 ref XM_001925693.1 | magenta       | 438.3793  | 75.156805 | 0.9594965 | 0.00972562 | 61.882  |
| gi 194034164 ref XM_001925794.1 | lightyellow   | 312.44864 | 55.922494 | 0.9674694 | 0.00700876 | 5.208   |
| gi 194034166 ref XM_001925915.1 | yellow        | 244.95466 | 117.22557 | 0.9679641 | 0.00685002 | 54.804  |
| gi 194034216 ref XM_001928595.1 | turquoise     | 387.31766 | 57.253786 | -0.011919 | 0.98482432 | 90.926  |
| gi 194034220 ref XM_001928748.1 | turquoise     | 839.65085 | 206.61364 | 0.9560604 | 0.01098336 | 20.238  |
| gi 194034226 ref XM_001928937.1 | darkorange    | 99.778214 | 9.732801  | 0.5816004 | 0.30365773 | 90.926  |
| gi 194034238 ref XM_001924848.1 | lightcyan     | 501.04635 | 58.627218 | 0.9847018 | 0.00226619 | 10.068  |
| gi 194034244 ref XM_001925555.1 | green         | 832.59569 | 112.25756 | 0.9902585 | 0.0011525  | 7.5     |
| gi 194034359 ref XM_001927037.1 | darkred       | 127.59167 | 29.8741   | 0.8955704 | 0.03987006 | 41.094  |
| gi 194034393 ref XM_001926625.1 | royalblue     | 741.99906 | 59.184223 | 0.9807911 | 0.00318663 | 12.708  |
| gi 194034443 ref XM_001928249.1 | turquoise     | 956.92097 | 201.37437 | 0.9211159 | 0.02627914 | 4.306   |
| gi 194034463 ref XM_001926549.1 | black         | 814.43549 | 105.16383 | 0.9922699 | 0.00081491 | 58.406  |
| gi 194034501 ref XM_001925096.1 | magenta       | 299.98318 | 80.367673 | 0.9841637 | 0.0023866  | 4.634   |
| gi 194034516 ref XM_001925886.1 | brown         | 399.7604  | 70.337795 | 0.8430492 | 0.07285864 | 1.578   |
| gi 194034537 ref XM_001925533.1 | turquoise     | 515.92981 | 58.16378  | 0.2368848 | 0.70123393 | 15.614  |
| gi 194034539 ref XM_001927513.1 | black         | 804.03664 | 107.10313 | 0.9962689 | 0.00027343 | 8.916   |
| gi 194034592 ref XM_001925373.1 | green         | 816.39103 | 87.504424 | 0.9341629 | 0.02007722 | 19.994  |
| gi 194034626 ref XM_001929026.1 | turquoise     | 826.04697 | 185.46356 | 0.9062982 | 0.0339434  | 30.252  |
| gi 194034657 ref XM_001924580.1 | pink          | 731.32188 | 134.6219  | 0.9782504 | 0.00383785 | 27.486  |
| gi 194034678 ref XM_001928189.1 | lightcyan     | 461.26629 | 52.894848 | 0.9653408 | 0.00770533 | 15.56   |
| gi 194034680 ref XM_001925553.1 | turquoise     | 182.89198 | 49.360273 | 0.4121536 | 0.49049061 | 11.028  |
| gi 194034692 ref XM_001928709.1 | royalblue     | 769.08148 | 59.796527 | 0.9822401 | 0.00283358 | 9.4     |
| gi 194034703 ref XM_001926714.1 | turquoise     | 947.42117 | 213.67815 | 0.9485321 | 0.01390775 | 11.468  |
| gi 194034713 ref XM_001925291.1 | royalblue     | 429.33442 | 54.491357 | 0.9616044 | 0.00897923 | 8.566   |
| gi 194034832 ref XM_001928118.1 | turquoise     | 602.39265 | 176.54681 | 0.907274  | 0.03341963 | 21.026  |
| gi 194034834 ref XM_001925793.1 | darkred       | 67.078464 | 8.234767  | 0.5279611 | 0.36046533 | 79.876  |
| gi 194034838 ref XM_001928143.1 | purple        | 290.58943 | 79.537145 | 0.9978235 | 0.00012185 | 6.112   |
| gi 194034874 ref XM_001929334.1 | violet        | 898.4166  | 46.676847 | 0.9893048 | 0.00132563 | 20.74   |
| gi 194034890 ref XM_001929399.1 | yellow        | 256.94442 | 122.09373 | 0.9767024 | 0.0042538  | 22.824  |
| gi 194034900 ref XM_001924788.1 | lightgreen    | 145.13798 | 19.933271 | 0.7201238 | 0.17007989 | 15.232  |
| gi 194034933 ref XM_001927442.1 | turquoise     | 1016.9373 | 209.6591  | 0.9318075 | 0.02115661 | 6.372   |
| gi 194034969 ref XM_001925674.1 | midnightblue  | 997.67708 | 71.916711 | 0.9797241 | 0.00345525 | 1093.45 |
| gi 194035059 ref XM_001924311.1 | orange        | 167.34585 | 33.286098 | 0.9489323 | 0.0137467  | 3.27    |
| gi 194035100 ref XM_001925477.1 | darkgrey      | 743.65113 | 46.413991 | 0.9659629 | 0.0074995  | 11.006  |

|                                 |               |           |           |           |            |         |
|---------------------------------|---------------|-----------|-----------|-----------|------------|---------|
| gi 194035108 ref XM_001926680.1 | turquoise     | 134.60638 | 33.124669 | -0.415869 | 0.48618395 | 37.754  |
| gi 194035136 ref XM_001924656.1 | navy          | 48.374028 | 6.4429902 | 0.3899782 | 0.51635403 | 54.408  |
| gi 194035172 ref XM_001924332.1 | purple        | 148.37316 | 39.676682 | 0.8421874 | 0.07344955 | 9.742   |
| gi 194035184 ref XM_001924626.1 | grey          | 572.89253 | 13.986957 | 0.9735968 | 0.00512969 | 27.956  |
| gi 194035216 ref XM_001928520.1 | darkturquoise | 120.4354  | 32.975342 | 0.9133191 | 0.03023361 | 90.988  |
| gi 194035235 ref XM_001924419.1 | navy          | 179.12099 | 39.85774  | 0.9831294 | 0.00262377 | 15.902  |
| gi 194035245 ref XM_001924870.1 | pink          | 973.23687 | 142.71182 | 0.9895442 | 0.0012814  | 8.786   |
| gi 194035288 ref XM_001927095.1 | midnightblue  | 947.61519 | 67.750378 | 0.9671481 | 0.00711251 | 6.846   |
| gi 194035296 ref XM_001927594.1 | turquoise     | 124.04873 | 46.239186 | 0.5547969 | 0.33173902 | 56.57   |
| gi 194035304 ref XM_001928396.1 | lightyellow   | 327.53589 | 55.044945 | 0.9643873 | 0.00802432 | 5.426   |
| gi 194035333 ref XM_001925774.1 | darkgreen     | 77.715385 | 10.545285 | 0.6184176 | 0.26616159 | 19.224  |
| gi 194035378 ref XM_001924314.1 | magenta       | 216.46879 | 77.227023 | 0.973585  | 0.00513312 | 2       |
| gi 194035408 ref XM_001926476.1 | pink          | 718.36997 | 131.02379 | 0.9727929 | 0.00536508 | 17.852  |
| gi 194035493 ref XM_001926740.1 | darkgreen     | 219.16473 | 18.63318  | 0.7419418 | 0.15112648 | 9.826   |
| gi 194035503 ref XM_001927458.1 | darkgreen     | 247.2838  | 43.03569  | 0.9947366 | 0.00045803 | 60.18   |
| gi 194035509 ref XM_001927620.1 | yellow        | 227.72761 | 84.071035 | 0.8924751 | 0.04163568 | 26.878  |
| gi 194035517 ref XM_001925462.1 | blue          | 393.20815 | 91.435914 | 0.8862099 | 0.04528304 | 21.496  |
| gi 194035561 ref XM_001924535.1 | blue          | 478.7791  | 109.23333 | 0.9251523 | 0.02430326 | 7.206   |
| gi 194035592 ref XM_001927531.1 | darkmagenta   | 149.67037 | 8.4342875 | 0.8609837 | 0.06090632 | 18.92   |
| gi 194035600 ref XM_001927804.1 | turquoise     | 667.65782 | 191.5725  | 0.9384711 | 0.01815111 | 186.116 |
| gi 194035607 ref XM_001928505.1 | midnightblue  | 704.24996 | 70.620754 | 0.9764802 | 0.00431466 | 10.196  |
| gi 194035627 ref XM_001924280.1 | navy          | 122.81927 | 38.759157 | 0.9456828 | 0.01507194 | 22.276  |
| gi 194035657 ref XM_001928441.1 | turquoise     | 946.62865 | 208.5186  | 0.9381602 | 0.01828799 | 8.218   |
| gi 194035679 ref XM_001925389.1 | turquoise     | 492.77413 | 59.610729 | 0.2227029 | 0.71880752 | 175.628 |
| gi 194035693 ref XM_001925021.1 | brown         | 662.20358 | 134.44006 | 0.9981424 | 9.61E-05   | 5.09    |
| gi 194035716 ref XM_001925987.1 | lightcyan     | 317.35099 | 55.02576  | 0.9796846 | 0.00346534 | 26.31   |
| gi 194035722 ref XM_001926997.1 | turquoise     | 206.42355 | 73.225564 | 0.6317769 | 0.25288507 | 24.978  |
| gi 194035733 ref XM_001925711.1 | navy          | 77.752288 | 9.1519027 | -0.801528 | 0.10292284 | 11.378  |
| gi 194035737 ref XM_001928295.1 | lightgreen    | 431.02627 | 38.349988 | 0.9332744 | 0.02048224 | 97.734  |
| gi 194035770 ref XM_001927929.1 | magenta       | 136.39399 | 55.864934 | 0.8925295 | 0.04160448 | 11.758  |
| gi 194035776 ref XM_001929384.1 | yellow        | 258.41001 | 121.33863 | 0.9762051 | 0.0043904  | 87.38   |
| gi 194035796 ref XM_001927740.1 | turquoise     | 683.40734 | 137.80486 | 0.8042466 | 0.10085926 | 34.222  |
| gi 194035836 ref XM_001928869.1 | royalblue     | 712.47663 | 61.935105 | 0.9911142 | 0.00100414 | 44.664  |
| gi 194035846 ref XM_001928960.1 | green         | 904.67282 | 104.1095  | 0.9700274 | 0.00620095 | 36.472  |
| gi 194035848 ref XM_001928966.1 | lightyellow   | 213.18922 | 41.188637 | 0.8991603 | 0.03785304 | 351.124 |
| gi 194035852 ref XM_001929031.1 | blue          | 937.87279 | 141.38407 | 0.9809437 | 0.00314882 | 32.292  |
| gi 194035954 ref XM_001927715.1 | darkred       | 130.00598 | 24.746176 | 0.8397224 | 0.07514779 | 12.962  |
| gi 194035974 ref XM_001924643.1 | lightgreen    | 388.57729 | 35.890982 | 0.9332623 | 0.02048777 | 14      |
| gi 194035999 ref XM_001924070.1 | brown         | 763.49415 | 133.90238 | 0.9936937 | 0.0006006  | 127.11  |
| gi 194036005 ref XM_001926377.1 | turquoise     | 339.8448  | 116.76059 | 0.7780483 | 0.12125689 | 95.21   |
| gi 194036011 ref XM_001926398.1 | midnightblue  | 944.47799 | 71.164226 | 0.9777202 | 0.00397872 | 5.498   |
| gi 194036046 ref XM_001928851.1 | midnightblue  | 764.86998 | 59.03149  | 0.9396985 | 0.01761401 | 18.688  |
| gi 194036068 ref XM_001926844.1 | turquoise     | 1005.5271 | 220.23036 | 0.9549814 | 0.01138852 | 3.528   |
| gi 194036118 ref XM_001927231.1 | turquoise     | 452.53964 | 116.78174 | 0.7564901 | 0.13885848 | 3.404   |
| gi 194036127 ref XM_001929512.1 | brown         | 514.0712  | 109.30153 | 0.9538718 | 0.01181014 | 66.488  |
| gi 194036134 ref XM_001929587.1 | lightgreen    | 261.13373 | 29.994988 | 0.8678908 | 0.05648519 | 12.146  |
| gi 194036224 ref XM_001929641.1 | darkred       | 190.68163 | 42.515183 | 0.9634822 | 0.00833102 | 84.986  |
| gi 194036226 ref XM_001929643.1 | darkgreen     | 178.85859 | 21.50819  | 0.8154021 | 0.09252676 | 26.75   |

|                                 |              |           |           |           |            |         |
|---------------------------------|--------------|-----------|-----------|-----------|------------|---------|
| gi 194036240 ref XM_001929654.1 | darkgreen    | 181.11787 | 19.121929 | 0.7356002 | 0.15656819 | 12.734  |
| gi 194036252 ref XM_001929660.1 | turquoise    | 205.13796 | 71.128959 | 0.5887614 | 0.29626428 | 41.512  |
| gi 194036256 ref XM_001929662.1 | turquoise    | 162.80289 | 64.000629 | 0.5647325 | 0.32125624 | 1.246   |
| gi 194036268 ref XM_001929668.1 | pink         | 828.63074 | 146.09322 | 0.9948978 | 0.00043715 | 7.874   |
| gi 194036284 ref XM_001924881.1 | salmon       | 194.3165  | 62.961301 | 0.9546076 | 0.01153001 | 50.076  |
| gi 194036295 ref XM_001926489.1 | midnightblue | 989.17182 | 69.037178 | 0.9710698 | 0.00588121 | 7.184   |
| gi 194036309 ref XM_001927637.1 | brown        | 59.613161 | 5.8855109 | 0.3272828 | 0.5908542  | 328.15  |
| gi 194036315 ref XM_001927860.1 | darkgrey     | 921.85502 | 53.000004 | 0.9934335 | 0.00063812 | 69.232  |
| gi 194036317 ref XM_001927969.1 | darkgrey     | 790.58339 | 48.453589 | 0.9749133 | 0.0047518  | 8.112   |
| gi 194036348 ref XM_001928686.1 | midnightblue | 812.75501 | 74.576281 | 0.9881236 | 0.00155091 | 10.568  |
| gi 194036390 ref XM_001929343.1 | turquoise    | 200.46633 | 81.479781 | 0.6389569 | 0.24582568 | 46.902  |
| gi 194036406 ref XM_001927918.1 | pink         | 930.29135 | 149.17918 | 0.998958  | 4.04E-05   | 8.584   |
| gi 194036424 ref XM_001925710.1 | turquoise    | 348.40326 | 80.59803  | 0.6243406 | 0.26025278 | 45.752  |
| gi 194036434 ref XM_001926977.1 | darkorange   | 87.926517 | 22.995621 | 0.8604814 | 0.06123191 | 17.246  |
| gi 194036458 ref XM_001928544.1 | turquoise    | 109.01719 | 31.303426 | 0.4420117 | 0.4561175  | 5.21    |
| gi 194036460 ref XM_001926279.1 | purple       | 285.98113 | 79.263706 | 0.9974431 | 0.00015514 | 8.68    |
| gi 194036462 ref XM_001928649.1 | green        | 863.15396 | 106.30625 | 0.9757919 | 0.00450498 | 67.268  |
| gi 194036467 ref XM_001928805.1 | turquoise    | 633.14526 | 146.53796 | 0.8408236 | 0.07438765 | 25.378  |
| gi 194036542 ref XM_001925670.1 | turquoise    | 792.3469  | 204.75622 | 0.9648848 | 0.00785733 | 109.568 |
| gi 194036571 ref XM_001927806.1 | blue         | 892.68524 | 131.08626 | 0.9626509 | 0.00861599 | 26.716  |
| gi 194036621 ref XM_001927321.1 | turquoise    | 305.20083 | 50.125462 | -0.056688 | 0.92786085 | 120.608 |
| gi 194036623 ref XM_001927665.1 | midnightblue | 901.24937 | 76.945641 | 0.994654  | 0.00046885 | 11.282  |
| gi 194036639 ref XM_001924618.1 | black        | 735.10541 | 104.88465 | 0.9919919 | 0.00085923 | 28.946  |
| gi 194036656 ref XM_001928010.1 | darkgrey     | 1000.6718 | 50.622131 | 0.9825573 | 0.00275814 | 18.394  |
| gi 194036668 ref XM_001926328.1 | grey         | 595.30599 | 14.300965 | 0.9749921 | 0.00472948 | 14.752  |
| gi 194036700 ref XM_001927375.1 | red          | 784.19887 | 114.93586 | 0.9781278 | 0.00387027 | 5.724   |
| gi 194036737 ref XM_001927243.1 | green        | 943.35913 | 105.25109 | 0.9720095 | 0.00559779 | 38.256  |
| gi 194036739 ref XM_001927255.1 | blue         | 988.23535 | 135.14179 | 0.9685912 | 0.0066505  | 7.076   |
| gi 194036748 ref XM_001928875.1 | turquoise    | 240.27808 | 54.329227 | -0.256082 | 0.67754564 | 3.502   |
| gi 194036762 ref XM_001925928.1 | blue         | 631.40716 | 134.6723  | 0.9724204 | 0.00547532 | 87.986  |
| gi 194036768 ref XM_001927459.1 | darkgrey     | 932.22167 | 54.31363  | 0.9985021 | 6.96E-05   | 2.318   |
| gi 194036770 ref XM_001925929.1 | navy         | 124.75324 | 39.30141  | 0.9531829 | 0.01207445 | 2.306   |
| gi 194036795 ref XM_001926863.1 | grey60       | 311.90302 | 69.086939 | 0.9989783 | 3.92E-05   | 174.856 |
| gi 194036805 ref XM_001928924.1 | turquoise    | 362.60614 | 60.190832 | 0.0249556 | 0.9682289  | 53.816  |
| gi 194036851 ref XM_001928643.1 | lightgreen   | 384.5819  | 26.276843 | 0.8801981 | 0.04887278 | 28.772  |
| gi 194036879 ref XM_001927666.1 | black        | 943.16914 | 96.651095 | 0.9733251 | 0.00520886 | 155.17  |
| gi 194036893 ref XM_001927714.1 | navy         | 349.23392 | 20.383485 | 0.8076291 | 0.09830969 | 15.028  |
| gi 194036901 ref XM_001927323.1 | turquoise    | 265.26545 | 96.52481  | 0.7655752 | 0.13135457 | 52.318  |
| gi 194036936 ref XM_001925783.1 | green        | 868.57166 | 116.12826 | 0.9974498 | 0.00015454 | 8.698   |
| gi 194036950 ref XM_001928451.1 | navy         | 63.196496 | 26.314096 | 0.8778812 | 0.05027916 | 14.1    |
| gi 194036956 ref XM_001924342.1 | royalblue    | 665.15001 | 63.121938 | 0.995471  | 0.00036563 | 11.508  |
| gi 194036972 ref XM_001927228.1 | turquoise    | 392.10885 | 136.69505 | 0.8590123 | 0.06218721 | 30.534  |
| gi 194036974 ref XM_001927747.1 | brown        | 830.95867 | 124.12301 | 0.969714  | 0.00629818 | 145.628 |
| gi 194037015 ref XM_001929116.1 | turquoise    | 224.55357 | 91.463556 | 0.6888315 | 0.19835264 | 73.85   |
| gi 194037021 ref XM_001926975.1 | royalblue    | 676.23593 | 61.433109 | 0.9895109 | 0.00128752 | 5.482   |
| gi 194037094 ref XM_001927574.1 | greenyellow  | 48.493293 | 9.7655141 | 0.2005613 | 0.74635987 | 117.348 |
| gi 194037139 ref XM_001925875.1 | purple       | 225.68266 | 64.119413 | 0.9527203 | 0.01225297 | 19.742  |
| gi 194037172 ref XM_001928663.1 | turquoise    | 190.13882 | 76.671424 | 0.6279963 | 0.25662366 | 70.81   |

|                                 |               |           |           |           |            |          |
|---------------------------------|---------------|-----------|-----------|-----------|------------|----------|
| gi 194037193 ref XM_001929169.1 | turquoise     | 123.57975 | 38.258388 | 0.4430532 | 0.45492827 | 8.274    |
| gi 194037198 ref XM_001929213.1 | orange        | 125.79154 | 27.770677 | 0.8883187 | 0.04404455 | 50.594   |
| gi 194037354 ref XM_001926198.1 | salmon        | 217.29811 | 70.353432 | 0.9770286 | 0.00416497 | 52.78    |
| gi 194037372 ref XM_001927549.1 | green         | 704.95893 | 97.562549 | 0.9611605 | 0.00913476 | 15.442   |
| gi 194037379 ref XM_001925252.1 | blue          | 918.406   | 142.65174 | 0.9823954 | 0.00279654 | 5.07     |
| gi 194037499 ref XM_001928879.1 | royalblue     | 634.15363 | 59.036777 | 0.9817705 | 0.00294649 | 16.17    |
| gi 194037532 ref XM_001929272.1 | darkorange    | 173.97792 | 30.587878 | 0.9645927 | 0.00795523 | 350.794  |
| gi 194037543 ref XM_001929293.1 | turquoise     | 221.63645 | 82.892722 | 0.6779867 | 0.20843287 | 33.104   |
| gi 194037553 ref XM_001929410.1 | greenyellow   | 168.25649 | 22.992314 | 0.7458615 | 0.14779123 | 1429.172 |
| gi 194037555 ref XM_001929413.1 | darkred       | 38.848783 | 5.1974738 | 0.4763732 | 0.41725537 | 46.446   |
| gi 194037571 ref XM_001929457.1 | turquoise     | 911.55409 | 218.51706 | 0.9665716 | 0.00729992 | 16.694   |
| gi 194037611 ref XM_001925424.1 | paleturquoise | 171.12706 | 22.464989 | 0.9392911 | 0.0177917  | 20.352   |
| gi 194037617 ref XM_001927127.1 | blue          | 890.59092 | 152.07947 | 0.9981529 | 9.53E-05   | 48.608   |
| gi 194037680 ref XM_001926355.1 | brown         | 87.346177 | 7.0111875 | 0.3703011 | 0.53952648 | 8.016    |
| gi 194037682 ref XM_001927000.1 | black         | 914.04871 | 102.7422  | 0.986535  | 0.00187183 | 15.938   |
| gi 194037707 ref XM_001924251.1 | navy          | 105.46184 | 38.730186 | 0.9739235 | 0.00503503 | 19.654   |
| gi 194037755 ref XM_001925059.1 | green         | 889.29654 | 110.02046 | 0.9834851 | 0.00254138 | 10.48    |
| gi 194037797 ref XM_001925445.1 | blue          | 917.73318 | 150.12069 | 0.994833  | 0.00044551 | 11.596   |
| gi 194037819 ref XM_001928548.1 | yellow        | 274.18358 | 129.13612 | 0.9901892 | 0.00116479 | 8.506    |
| gi 194037863 ref XM_001925621.1 | yellow        | 205.15822 | 90.930507 | 0.9087516 | 0.03263144 | 86.31    |
| gi 194037865 ref XM_001928013.1 | darkturquoise | 149.86738 | 38.776833 | 0.9517782 | 0.01261921 | 41.448   |
| gi 194037879 ref XM_001925784.1 | red           | 901.22843 | 126.72527 | 0.9977726 | 0.00012615 | 11.164   |
| gi 194037903 ref XM_001927180.1 | purple        | 256.82755 | 57.864502 | 0.9224889 | 0.02560146 | 24.806   |
| gi 194037930 ref XM_001928852.1 | turquoise     | 959.30022 | 210.05534 | 0.9432536 | 0.0160883  | 13.558   |
| gi 194037950 ref XM_001926744.1 | tan           | 107.90595 | 27.969298 | 0.8070065 | 0.09877751 | 6.158    |
| gi 194037952 ref XM_001924515.1 | darkorange    | 151.66353 | 33.642775 | 0.9898812 | 0.00122002 | 64.628   |
| gi 194037997 ref XM_001926200.1 | violet        | 990.19088 | 43.677214 | 0.9569133 | 0.0106665  | 17.92    |
| gi 194038023 ref XM_001928502.1 | tan           | 136.7527  | 39.886979 | 0.9447594 | 0.01545575 | 31.88    |
| gi 194038027 ref XM_001928638.1 | darkorange    | 118.92851 | 28.80874  | 0.932387  | 0.02088935 | 2.146    |
| gi 194038031 ref XM_001928655.1 | salmon        | 99.299672 | 39.063937 | 0.8543025 | 0.06528081 | 7.126    |
| gi 194038037 ref XM_001929120.1 | skyblue       | 512.17325 | 42.76928  | 0.9912071 | 0.00098846 | 63.398   |
| gi 194038045 ref XM_001925447.1 | brown         | 756.91638 | 132.62837 | 0.9918337 | 0.00088479 | 6.526    |
| gi 194038066 ref XM_001927909.1 | greenyellow   | 71.210466 | 10.715546 | 0.537814  | 0.34984985 | 157.11   |
| gi 194038088 ref XM_001925288.1 | lightyellow   | 495.64954 | 63.230066 | 0.9951397 | 0.00040645 | 23.108   |
| gi 194038104 ref XM_001925531.1 | green         | 871.69895 | 111.70218 | 0.9884765 | 0.00148238 | 14.398   |
| gi 194038194 ref XM_001927473.1 | green         | 807.48723 | 109.86867 | 0.9860817 | 0.001967   | 75.722   |
| gi 194038223 ref XM_001926312.1 | lightyellow   | 575.50939 | 60.235378 | 0.9833263 | 0.00257805 | 1.482    |
| gi 194038225 ref XM_001926546.1 | lightcyan     | 493.14583 | 37.831753 | 0.8834714 | 0.04690748 | 12.58    |
| gi 194038241 ref XM_001927985.1 | turquoise     | 209.3505  | 81.443987 | 0.5966638 | 0.28816052 | 43.488   |
| gi 194038245 ref XM_001928187.1 | violet        | 90.647567 | 7.5552643 | -0.782826 | 0.11745392 | 207.306  |
| gi 194038277 ref XM_001926890.1 | turquoise     | 458.63572 | 138.91566 | 0.8196264 | 0.08942925 | 38.65    |
| gi 194038297 ref XM_001926748.1 | yellow        | 292.70558 | 130.63544 | 0.9924175 | 0.0007917  | 7.518    |
| gi 194038313 ref XM_001925341.1 | violet        | 43.197196 | 8.3182122 | -0.937201 | 0.01871237 | 75.882   |
| gi 194038369 ref XM_001929075.1 | orange        | 430.77861 | 14.206532 | 0.6952522 | 0.19245148 | 45.766   |
| gi 194038432 ref XM_001925495.1 | salmon        | 106.54847 | 41.928149 | 0.8691501 | 0.05569046 | 13.894   |
| gi 194038454 ref XM_001928679.1 | turquoise     | 452.72378 | 112.66777 | 0.7781772 | 0.12115382 | 41.792   |
| gi 194038464 ref XM_001924308.1 | skyblue       | 495.23077 | 42.948798 | 0.992296  | 0.00081079 | 131.502  |
| gi 194038478 ref XM_001926160.1 | yellow        | 310.66149 | 127.27382 | 0.9854801 | 0.00209571 | 22.55    |

|                                 |             |           |           |           |            |         |
|---------------------------------|-------------|-----------|-----------|-----------|------------|---------|
| gi 194038505 ref XM_001928042.1 | turquoise   | 159.17634 | 56.434235 | 0.5619392 | 0.32419482 | 17.636  |
| gi 194038533 ref XM_001929074.1 | blue        | 841.25435 | 149.02461 | 0.9939996 | 0.00055746 | 49.842  |
| gi 194038541 ref XM_001929173.1 | turquoise   | 158.41571 | 38.747328 | -0.491624 | 0.40026398 | 49.476  |
| gi 194038545 ref XM_001929151.1 | navy        | 146.22358 | 40.765433 | 0.9654255 | 0.00767719 | 4.882   |
| gi 194038579 ref XM_001926122.1 | green       | 775.32196 | 111.05888 | 0.9891565 | 0.00135326 | 10.864  |
| gi 194038585 ref XM_001926711.1 | turquoise   | 535.26505 | 168.22255 | 0.9086855 | 0.03266661 | 120.414 |
| gi 194038610 ref XM_001926123.1 | turquoise   | 192.33954 | 55.518829 | 0.5180305 | 0.37124213 | 11.318  |
| gi 194038708 ref XM_001928665.1 | lightyellow | 419.31931 | 58.969615 | 0.9810412 | 0.00312472 | 76.942  |
| gi 194038714 ref XM_001926092.1 | darkorange  | 112.30916 | 32.237131 | 0.9609309 | 0.00921557 | 11.7    |
| gi 194038723 ref XM_001929103.1 | darkgreen   | 153.17624 | 30.608605 | 0.8873801 | 0.0445944  | 27.892  |
| gi 194038729 ref XM_001929090.1 | magenta     | 176.85945 | 66.62668  | 0.9377471 | 0.01847039 | 283.6   |
| gi 194038781 ref XM_001926473.1 | turquoise   | 116.38506 | 32.154199 | 0.4168253 | 0.4850774  | 76.47   |
| gi 194038808 ref XM_001924784.1 | skyblue     | 638.25661 | 37.797957 | 0.9608634 | 0.00923939 | 70.276  |
| gi 194038816 ref XM_001925028.1 | pink        | 911.2619  | 149.78175 | 0.9998705 | 1.77E-06   | 4.632   |
| gi 194038854 ref XM_001928014.1 | red         | 917.25604 | 125.37381 | 0.9954366 | 0.0003698  | 29.94   |
| gi 194038856 ref XM_001925833.1 | blue        | 996.45624 | 132.95072 | 0.9646183 | 0.00794665 | 9.872   |
| gi 194038862 ref XM_001928271.1 | green       | 567.11813 | 87.059643 | 0.9361023 | 0.01920237 | 47.53   |
| gi 194038869 ref XM_001928468.1 | pink        | 892.52327 | 144.08521 | 0.9920432 | 0.00085099 | 5.94    |
| gi 194038879 ref XM_001928723.1 | turquoise   | 456.50776 | 60.36423  | 0.1503247 | 0.80932396 | 8.966   |
| gi 194038896 ref XM_001924415.1 | navy        | 79.968222 | 32.311154 | 0.8865319 | 0.04509322 | 20.822  |
| gi 194038900 ref XM_001925133.1 | lightcyan   | 591.25612 | 54.662393 | 0.9597371 | 0.00963942 | 14.402  |
| gi 194038904 ref XM_001924445.1 | yellow      | 291.29386 | 132.18868 | 0.9946441 | 0.00047015 | 178.25  |
| gi 194038910 ref XM_001926121.1 | salmon      | 227.01325 | 75.851932 | 0.9941607 | 0.00053517 | 30.168  |
| gi 194038924 ref XM_001927577.1 | violet      | 991.8746  | 43.159959 | 0.9531155 | 0.01210039 | 19.658  |
| gi 194038958 ref XM_001929118.1 | black       | 854.38294 | 103.57153 | 0.9891751 | 0.00134978 | 10.732  |
| gi 194039226 ref XM_001928899.1 | greenyellow | 181.79011 | 37.790486 | 0.9633626 | 0.0083718  | 260.556 |
| gi 194039238 ref XM_001924410.1 | violet      | 946.93427 | 45.941053 | 0.9797175 | 0.00345694 | 1.938   |
| gi 194039264 ref XM_001927148.1 | turquoise   | 300.41248 | 48.838835 | -0.041591 | 0.94705995 | 27.506  |
| gi 194039300 ref XM_001928656.1 | salmon      | 225.57235 | 77.699046 | 0.9990269 | 3.64E-05   | 5.78    |
| gi 194039310 ref XM_001929246.1 | turquoise   | 491.32489 | 158.25726 | 0.8869608 | 0.04484078 | 23.792  |
| gi 194039316 ref XM_001929265.1 | brown       | 160.49364 | 11.015594 | 0.4861385 | 0.40635645 | 69.186  |
| gi 194039362 ref XM_001929482.1 | darkgreen   | 61.291201 | 12.950032 | 0.6577463 | 0.22761252 | 46.32   |
| gi 194039364 ref XM_001929510.1 | red         | 953.13388 | 120.71263 | 0.9872388 | 0.00172718 | 10.718  |
| gi 194039388 ref XM_001929568.1 | blue        | 764.70725 | 149.34827 | 0.9959011 | 0.00031482 | 18.646  |
| gi 194039390 ref XM_001929570.1 | blue        | 542.12714 | 88.742881 | 0.8757144 | 0.0516058  | 260.05  |
| gi 194039392 ref XM_001929581.1 | darkorange  | 83.394908 | 19.063883 | 0.8138286 | 0.09368878 | 13.614  |
| gi 194039480 ref XM_001926227.1 | turquoise   | 842.47168 | 213.86949 | 0.9691435 | 0.00647639 | 59.532  |
| gi 194039486 ref XM_001927002.1 | orange      | 215.03808 | 14.443812 | 0.6906202 | 0.19670365 | 31.934  |
| gi 194039490 ref XM_001927338.1 | blue        | 960.37069 | 138.66968 | 0.9752871 | 0.00464626 | 185.96  |
| gi 194039546 ref XM_001928863.1 | turquoise   | 991.76879 | 206.09726 | 0.9273852 | 0.02323183 | 17.856  |
| gi 194039573 ref XM_001927296.1 | turquoise   | 439.41836 | 147.15439 | 0.8557462 | 0.06432754 | 52.552  |
| gi 194039577 ref XM_001927339.1 | magenta     | 374.46309 | 82.205185 | 0.9844894 | 0.00231347 | 19.804  |
| gi 194039585 ref XM_001929378.1 | brown       | 840.10341 | 123.10828 | 0.9677357 | 0.00692317 | 9.676   |
| gi 194039587 ref XM_001929390.1 | green       | 872.98958 | 111.47956 | 0.9875146 | 0.00167156 | 15.144  |
| gi 194039595 ref XM_001929425.1 | green       | 644.19265 | 75.228295 | 0.9058543 | 0.03418256 | 12.44   |
| gi 194039625 ref XM_001925622.1 | pink        | 891.69021 | 149.36923 | 0.9993371 | 2.05E-05   | 5.476   |
| gi 194039636 ref XM_001927064.1 | darkred     | 162.22688 | 37.342035 | 0.9461579 | 0.01487572 | 28.226  |
| gi 194039679 ref XM_001928732.1 | darkgrey    | 860.45532 | 51.027276 | 0.985645  | 0.00206017 | 154.422 |



|                                 |              |           |           |           |            |         |
|---------------------------------|--------------|-----------|-----------|-----------|------------|---------|
| gi 194039687 ref XM_001928955.1 | turquoise    | 949.05428 | 197.94538 | 0.9129025 | 0.03044988 | 24.594  |
| gi 194039697 ref XM_001929172.1 | yellow       | 238.67089 | 73.049304 | 0.8540116 | 0.06547338 | 36.354  |
| gi 194039707 ref XM_001929228.1 | lightyellow  | 347.81219 | 58.026459 | 0.9762992 | 0.00436444 | 44.868  |
| gi 194039709 ref XM_001929236.1 | magenta      | 341.68374 | 72.887703 | 0.9596619 | 0.00966634 | 36.068  |
| gi 194039733 ref XM_001928398.1 | royalblue    | 545.71747 | 61.494483 | 0.9896168 | 0.00126811 | 8.662   |
| gi 194039735 ref XM_001928389.1 | royalblue    | 744.16896 | 62.099494 | 0.9912767 | 0.00097676 | 152.064 |
| gi 194039851 ref XM_001928253.1 | turquoise    | 507.27833 | 146.85592 | 0.8442312 | 0.07205061 | 33.43   |
| gi 194039979 ref XM_001927951.1 | greenyellow  | 206.75274 | 29.292393 | 0.8545504 | 0.06511683 | 0.996   |
| gi 194040110 ref XM_001929541.1 | purple       | 304.20968 | 74.442276 | 0.9816107 | 0.00298525 | 31.47   |
| gi 194040173 ref XM_001926225.1 | purple       | 270.30626 | 68.114475 | 0.9590465 | 0.00988747 | 70.666  |
| gi 194040232 ref XM_001929613.1 | black        | 770.99855 | 105.18244 | 0.9926015 | 0.00076307 | 10.72   |
| gi 194040254 ref XM_001929631.1 | brown        | 191.86749 | 28.622188 | 0.6340473 | 0.25064691 | 19.664  |
| gi 194040263 ref XM_001927880.1 | greenyellow  | 157.03418 | 29.364645 | 0.9257713 | 0.02400468 | 32.916  |
| gi 194040280 ref XM_001925339.1 | turquoise    | 904.26804 | 206.80468 | 0.9327763 | 0.02071045 | 8.634   |
| gi 194040288 ref XM_001927655.1 | yellow       | 310.0952  | 124.66822 | 0.9795862 | 0.00349047 | 5.028   |
| gi 194040321 ref XM_001928400.1 | turquoise    | 298.92891 | 104.05228 | 0.7184176 | 0.17158908 | 14.554  |
| gi 194040325 ref XM_001928445.1 | greenyellow  | 201.59211 | 39.068335 | 0.9811768 | 0.00309132 | 3.888   |
| gi 194040339 ref XM_001928739.1 | brown        | 341.12461 | 58.830878 | 0.8040599 | 0.10100056 | 25.18   |
| gi 194040341 ref XM_001928820.1 | royalblue    | 825.01031 | 53.722381 | 0.9571111 | 0.01059347 | 18.634  |
| gi 194040377 ref XM_001929415.1 | blue         | 647.47516 | 136.0277  | 0.9760471 | 0.0044341  | 7.018   |
| gi 194040411 ref XM_001929558.1 | turquoise    | 947.47478 | 221.84339 | 0.967485  | 0.00700374 | 117.254 |
| gi 194040420 ref XM_001929571.1 | black        | 872.65026 | 107.19231 | 0.9959998 | 0.00030352 | 6.92    |
| gi 194040422 ref XM_001929580.1 | greenyellow  | 153.48934 | 33.636352 | 0.9165916 | 0.02855215 | 92.386  |
| gi 194040449 ref XM_001927957.1 | greenyellow  | 55.062325 | 11.603393 | 0.2687539 | 0.66197701 | 167.77  |
| gi 194040485 ref XM_001926913.1 | turquoise    | 228.49111 | 50.054097 | -0.291696 | 0.63393772 | 48.018  |
| gi 194040487 ref XM_001926988.1 | salmon       | 233.5142  | 73.530234 | 0.9869681 | 0.00178235 | 13.678  |
| gi 194040489 ref XM_001927223.1 | darkorange   | 108.37949 | 15.704486 | 0.7964714 | 0.10679421 | 18.074  |
| gi 194040496 ref XM_001928226.1 | turquoise    | 1010.8707 | 218.18078 | 0.9499813 | 0.01332746 | 9.51    |
| gi 194040529 ref XM_001924631.1 | lightyellow  | 666.83117 | 47.438608 | 0.9330989 | 0.02056257 | 8.596   |
| gi 194040558 ref XM_001928742.1 | blue         | 902.53415 | 150.39472 | 0.9951152 | 0.00040953 | 19.812  |
| gi 194040603 ref XM_001928485.1 | brown        | 805.70415 | 108.14974 | 0.9399603 | 0.01750011 | 21.884  |
| gi 194040641 ref XM_001925120.1 | turquoise    | 137.34615 | 54.003123 | 0.5282591 | 0.36014309 | 12.528  |
| gi 194040677 ref XM_001927466.1 | midnightblue | 948.82822 | 78.084679 | 0.9973408 | 0.00016455 | 5.952   |
| gi 194040706 ref XM_001927201.1 | turquoise    | 391.53663 | 59.404772 | 0.0048255 | 0.99385598 | 89.624  |
| gi 194040743 ref XM_001927771.1 | turquoise    | 517.6192  | 156.85639 | 0.8622519 | 0.06008677 | 17.506  |
| gi 194040755 ref XM_001927097.1 | green        | 731.88332 | 107.13403 | 0.9823135 | 0.00281605 | 24.58   |
| gi 194040778 ref XM_001927213.1 | green        | 527.38389 | 82.770397 | 0.9245008 | 0.02461879 | 15.226  |
| gi 194040784 ref XM_001927731.1 | turquoise    | 1017.2913 | 207.92635 | 0.9277684 | 0.02304956 | 25.61   |
| gi 194040788 ref XM_001925300.1 | red          | 867.37383 | 125.04673 | 0.9951095 | 0.00041025 | 31.006  |
| gi 194040816 ref XM_001925581.1 | brown        | 708.28374 | 136.3472  | 0.9990906 | 3.29E-05   | 18.456  |
| gi 194040900 ref XM_001928469.1 | orange       | 308.57417 | 19.269242 | 0.7906061 | 0.11133856 | 68.16   |
| gi 194040929 ref XM_001925268.1 | royalblue    | 576.84583 | 63.138602 | 0.9956333 | 0.00034617 | 11.228  |
| gi 194040939 ref XM_001924716.1 | green        | 663.66932 | 104.54427 | 0.9761749 | 0.00439872 | 14.552  |
| gi 194040961 ref XM_001924920.1 | white        | 971.34336 | 46.988572 | 0.9923499 | 0.0008023  | 3.282   |
| gi 194040979 ref XM_001928486.1 | yellow       | 147.50203 | 66.374925 | 0.8407036 | 0.07447033 | 331.414 |
| gi 194040981 ref XM_001928597.1 | midnightblue | 582.99457 | 56.126423 | 0.9292877 | 0.02233136 | 45.276  |
| gi 194040983 ref XM_001927342.1 | turquoise    | 464.11173 | 59.352439 | 0.1816113 | 0.77004282 | 74.196  |
| gi 194040993 ref XM_001924500.1 | lightgreen   | 442.78563 | 34.608344 | 0.9330087 | 0.02060387 | 7.162   |

|                                 |               |           |           |           |            |         |
|---------------------------------|---------------|-----------|-----------|-----------|------------|---------|
| gi 194041007 ref XM_001926441.1 | brown         | 873.09281 | 115.30214 | 0.9511806 | 0.01285336 | 24.082  |
| gi 194041034 ref XM_001928236.1 | lightyellow   | 302.60667 | 52.240609 | 0.9537682 | 0.01184978 | 5.104   |
| gi 194041080 ref XM_001924608.1 | turquoise     | 255.09752 | 56.00468  | -0.256857 | 0.67659175 | 5.4     |
| gi 194041087 ref XM_001927225.1 | salmon        | 231.405   | 76.485662 | 0.9950323 | 0.00041999 | 86.848  |
| gi 194041154 ref XM_001925630.1 | tan           | 148.84204 | 45.121009 | 0.9783141 | 0.00382105 | 13.19   |
| gi 194041236 ref XM_001928454.1 | pink          | 892.54668 | 144.93218 | 0.9931937 | 0.00067337 | 44.208  |
| gi 194041241 ref XM_001928861.1 | darkturquoise | 256.85194 | 38.577502 | 0.9491067 | 0.01367671 | 1335.15 |
| gi 194041305 ref XM_001927960.1 | turquoise     | 369.41721 | 61.731647 | -0.010909 | 0.98611077 | 19.19   |
| gi 194041319 ref XM_001928397.1 | darkorange    | 147.45495 | 11.991565 | 0.6595206 | 0.22591269 | 12.438  |
| gi 194041329 ref XM_001928735.1 | turquoise     | 970.51502 | 197.33858 | 0.9165416 | 0.02857764 | 2.478   |
| gi 194041338 ref XM_001928892.1 | grey60        | 308.5097  | 67.552455 | 0.9943832 | 0.0005049  | 13.948  |
| gi 194041353 ref XM_001926876.1 | tan           | 135.13226 | 29.797894 | 0.8543763 | 0.06523198 | 5.148   |
| gi 194041357 ref XM_001926917.1 | green         | 564.16344 | 68.536363 | 0.8864343 | 0.04515075 | 21.758  |
| gi 194041366 ref XM_001924481.1 | black         | 859.27262 | 107.21585 | 0.9960678 | 0.00029583 | 11.298  |
| gi 194041368 ref XM_001924555.1 | turquoise     | 999.69878 | 215.3362  | 0.9448957 | 0.01539888 | 26.018  |
| gi 194041393 ref XM_001928536.1 | black         | 615.87284 | 93.580041 | 0.9672811 | 0.0070695  | 32.348  |
| gi 194041450 ref XM_001928163.1 | lightgreen    | 322.98207 | 32.817268 | 0.9137446 | 0.03001325 | 34.026  |
| gi 194041518 ref XM_001927414.1 | turquoise     | 466.04304 | 50.095564 | 0.1437316 | 0.81762734 | 30.728  |
| gi 194041588 ref XM_001927189.1 | turquoise     | 456.19688 | 143.61577 | 0.8717504 | 0.05406071 | 7.296   |
| gi 194041596 ref XM_001927803.1 | navy          | 65.439929 | 31.269625 | 0.9036187 | 0.03539505 | 7.354   |
| gi 194041636 ref XM_001929009.1 | purple        | 145.27559 | 36.231925 | 0.8155124 | 0.0924455  | 39.698  |
| gi 194041732 ref XM_001927648.1 | blue          | 515.11223 | 72.855684 | 0.8411918 | 0.07413401 | 14.07   |
| gi 194041758 ref XM_001924615.1 | darkorange    | 144.8559  | 13.160146 | 0.685203  | 0.20170971 | 14.898  |
| gi 194041760 ref XM_001924661.1 | turquoise     | 622.67303 | 187.37635 | 0.9514585 | 0.01274431 | 1.484   |
| gi 194041762 ref XM_001927529.1 | darkgrey      | 998.94579 | 51.634212 | 0.9867422 | 0.00182883 | 6.774   |
| gi 194041780 ref XM_001925192.1 | turquoise     | 1001.3097 | 211.52785 | 0.9349154 | 0.01973628 | 37.77   |
| gi 194041796 ref XM_001928803.1 | red           | 667.02878 | 99.74286  | 0.9500391 | 0.01330448 | 9.73    |
| gi 194041820 ref XM_001929110.1 | blue          | 757.6057  | 147.4655  | 0.9928305 | 0.00072795 | 7.522   |
| gi 194041839 ref XM_001929344.1 | salmon        | 240.57708 | 74.110803 | 0.9880961 | 0.0015563  | 16.526  |
| gi 194041857 ref XM_001924202.1 | midnightblue  | 823.87545 | 75.834758 | 0.9914183 | 0.00095308 | 6.23    |
| gi 194041859 ref XM_001924277.1 | turquoise     | 250.33588 | 49.155099 | -0.282008 | 0.64575436 | 4.346   |
| gi 194041878 ref XM_001924973.1 | yellow        | 241.47921 | 105.47716 | 0.9431859 | 0.01611692 | 66.414  |
| gi 194041914 ref XM_001928393.1 | turquoise     | 176.60253 | 52.801066 | 0.4507188 | 0.44619699 | 51.124  |
| gi 194041916 ref XM_001925662.1 | pink          | 990.27986 | 139.84058 | 0.9852218 | 0.00215179 | 2.844   |
| gi 194041932 ref XM_001928812.1 | lightgreen    | 206.79798 | 15.705744 | 0.7436621 | 0.14965998 | 32.948  |
| gi 194041960 ref XM_001929335.1 | grey60        | 290.68606 | 58.259911 | 0.9621353 | 0.00879435 | 46.704  |
| gi 194041962 ref XM_001926774.1 | tan           | 152.0101  | 24.688449 | 0.7857985 | 0.11510565 | 8.94    |
| gi 194042016 ref XM_001926579.1 | green         | 782.64405 | 114.01357 | 0.9948954 | 0.00043746 | 26.504  |
| gi 194042046 ref XM_001928978.1 | darkorange    | 83.000931 | 24.353908 | 0.8711312 | 0.05444743 | 16.914  |
| gi 194042125 ref XM_001928342.1 | skyblue       | 651.75909 | 38.349    | 0.9636883 | 0.00826083 | 126.964 |
| gi 194042129 ref XM_001927395.1 | blue          | 933.78672 | 143.40689 | 0.9837429 | 0.0024822  | 19.998  |
| gi 194042141 ref XM_001929000.1 | green         | 678.84117 | 104.70397 | 0.9766749 | 0.00426131 | 56.38   |
| gi 194042170 ref XM_001929360.1 | violet        | 217.02645 | 7.430984  | 0.1079829 | 0.86277961 | 22.518  |
| gi 194042188 ref XM_001924178.1 | violet        | 207.97686 | 7.0043162 | 0.0769593 | 0.90210919 | 48.256  |
| gi 194042190 ref XM_001924717.1 | blue          | 847.47004 | 140.21867 | 0.9799859 | 0.00338868 | 16.03   |
| gi 194042230 ref XM_001927832.1 | midnightblue  | 955.63161 | 77.371138 | 0.995344  | 0.0003811  | 14.928  |
| gi 194042273 ref XM_001927415.1 | green         | 814.28092 | 113.61561 | 0.9942085 | 0.00052862 | 14.278  |
| gi 194042287 ref XM_001927955.1 | midnightblue  | 839.04337 | 76.096461 | 0.9920042 | 0.00085724 | 64.744  |

|                                 |              |           |           |           |            |         |
|---------------------------------|--------------|-----------|-----------|-----------|------------|---------|
| gi 194042295 ref XM_001928522.1 | turquoise    | 615.07178 | 166.62067 | 0.8778839 | 0.0502775  | 28.306  |
| gi 194042303 ref XM_001928772.1 | brown        | 768.15456 | 124.47032 | 0.9697871 | 0.00627543 | 57.818  |
| gi 194042305 ref XM_001928810.1 | magenta      | 443.70615 | 71.005266 | 0.9460184 | 0.01493323 | 28.378  |
| gi 194042311 ref XM_001925999.1 | blue         | 311.45859 | 60.671208 | 0.7940679 | 0.10864948 | 17.798  |
| gi 194042329 ref XM_001929115.1 | turquoise    | 355.23674 | 111.73704 | 0.8106368 | 0.0960594  | 0.976   |
| gi 194042367 ref XM_001926555.1 | turquoise    | 980.64099 | 222.10411 | 0.9615686 | 0.00899174 | 39.524  |
| gi 194042373 ref XM_001925458.1 | lightcyan    | 454.97497 | 52.163546 | 0.9624932 | 0.00867043 | 7.266   |
| gi 194042394 ref XM_001927941.1 | orange       | 167.6193  | 28.877551 | 0.9109056 | 0.03149334 | 1.374   |
| gi 194042396 ref XM_001927868.1 | green        | 530.89218 | 87.67806  | 0.9365261 | 0.01901286 | 4.08    |
| gi 194042438 ref XM_001927977.1 | turquoise    | 1013.4814 | 201.89665 | 0.915951  | 0.02887889 | 33.294  |
| gi 194042457 ref XM_001928703.1 | tan          | 78.898382 | 19.707179 | 0.6869812 | 0.20006257 | 14.77   |
| gi 194042459 ref XM_001928724.1 | turquoise    | 210.65513 | 47.377569 | -0.253248 | 0.68103554 | 14.24   |
| gi 194042469 ref XM_001928931.1 | orange       | 191.86713 | 35.666807 | 0.9729914 | 0.00530665 | 0.618   |
| gi 194042472 ref XM_001924771.1 | midnightblue | 936.32495 | 78.463245 | 0.998373  | 7.88E-05   | 18.616  |
| gi 194042477 ref XM_001926521.1 | lightyellow  | 321.66194 | 49.335179 | 0.9444038 | 0.01560436 | 39.796  |
| gi 194042479 ref XM_001926556.1 | turquoise    | 700.00607 | 173.84312 | 0.8849007 | 0.04605738 | 4.766   |
| gi 194042490 ref XM_001925381.1 | salmon       | 165.34166 | 54.51745  | 0.9252102 | 0.02427528 | 67.726  |
| gi 194042528 ref XM_001927272.1 | pink         | 961.7948  | 133.69074 | 0.9761579 | 0.00440344 | 645.53  |
| gi 194042562 ref XM_001925435.1 | black        | 637.42952 | 95.783054 | 0.9724987 | 0.00545209 | 6.358   |
| gi 194042583 ref XM_001928329.1 | yellow       | 272.20058 | 127.4598  | 0.9865489 | 0.00186894 | 46.458  |
| gi 194042598 ref XM_001924401.1 | magenta      | 572.40403 | 52.74897  | 0.8677041 | 0.05660331 | 23.704  |
| gi 194042624 ref XM_001927934.1 | turquoise    | 920.56387 | 197.96278 | 0.919789  | 0.02693948 | 5.788   |
| gi 194042632 ref XM_001928164.1 | blue         | 867.66056 | 151.26711 | 0.9972417 | 0.00017382 | 4.606   |
| gi 194042649 ref XM_001928781.1 | brown        | 660.34572 | 128.5946  | 0.9832316 | 0.00260002 | 13.024  |
| gi 194042680 ref XM_001929224.1 | white        | 760.9147  | 42.647932 | 0.9212484 | 0.02621349 | 6.994   |
| gi 194042688 ref XM_001929282.1 | green        | 555.88465 | 65.082929 | 0.87411   | 0.05259504 | 6.946   |
| gi 194042690 ref XM_001929322.1 | black        | 687.46484 | 100.4648  | 0.9828935 | 0.0026789  | 39.034  |
| gi 194042702 ref XM_001925079.1 | turquoise    | 896.73438 | 203.74986 | 0.9293353 | 0.02230898 | 3.126   |
| gi 194042725 ref XM_001925659.1 | blue         | 760.31966 | 125.60734 | 0.9534563 | 0.01196932 | 3.734   |
| gi 194042749 ref XM_001925080.1 | turquoise    | 367.36857 | 119.16723 | 0.8325653 | 0.08014611 | 126.154 |
| gi 194042783 ref XM_001924319.1 | lightgreen   | 406.51049 | 35.944733 | 0.8815855 | 0.04803666 | 3.362   |
| gi 194042787 ref XM_001924736.1 | navy         | 106.85981 | 5.839109  | -0.745705 | 0.14792384 | 56.614  |
| gi 194042789 ref XM_001925275.1 | tan          | 168.62869 | 36.592253 | 0.9030709 | 0.0356942  | 58.51   |
| gi 194042801 ref XM_001927517.1 | turquoise    | 634.86428 | 173.26646 | 0.9028624 | 0.03580832 | 31.544  |
| gi 194042805 ref XM_001927802.1 | yellow       | 227.06857 | 105.97742 | 0.9426674 | 0.01633675 | 184.598 |
| gi 194042813 ref XM_001928193.1 | black        | 898.77052 | 101.19092 | 0.9831472 | 0.00261964 | 10.908  |
| gi 194042821 ref XM_001928374.1 | black        | 891.22625 | 104.10319 | 0.9894266 | 0.00130306 | 15.546  |
| gi 194042829 ref XM_001928949.1 | navy         | 86.799857 | 24.692129 | 0.8439497 | 0.07224278 | 5.852   |
| gi 194042833 ref XM_001929033.1 | navy         | 64.727504 | 19.618124 | 0.7927038 | 0.10970674 | 38.874  |
| gi 194042835 ref XM_001929055.1 | grey60       | 255.91538 | 52.198207 | 0.9396938 | 0.01761605 | 19.124  |
| gi 194042841 ref XM_001929155.1 | red          | 609.36606 | 95.763642 | 0.9409012 | 0.01709281 | 8.17    |
| gi 194042857 ref XM_001927712.1 | black        | 723.77673 | 100.42982 | 0.9831904 | 0.00260958 | 24.2    |
| gi 194042859 ref XM_001927602.1 | turquoise    | 764.77135 | 183.9304  | 0.9187286 | 0.02747098 | 20.21   |
| gi 194042865 ref XM_001925507.1 | turquoise    | 483.52769 | 150.99041 | 0.8544456 | 0.06518608 | 9.664   |
| gi 194042903 ref XM_001928981.1 | violet       | 45.119173 | 7.9466588 | -0.864785 | 0.05846039 | 32.764  |
| gi 194042939 ref XM_001929407.1 | midnightblue | 969.78496 | 73.815943 | 0.9852176 | 0.00215271 | 7.302   |
| gi 194042943 ref XM_001929420.1 | turquoise    | 464.9057  | 139.74007 | 0.8185902 | 0.09018605 | 20.542  |
| gi 194042960 ref XM_001929554.1 | turquoise    | 830.99489 | 211.19376 | 0.966658  | 0.00727171 | 9.804   |

|                                 |              |           |           |           |            |          |
|---------------------------------|--------------|-----------|-----------|-----------|------------|----------|
| gi 194042969 ref XM_001929585.1 | navy         | 98.403407 | 29.734596 | 0.9255721 | 0.02410064 | 193.812  |
| gi 194043008 ref XM_001928156.1 | darkgrey     | 930.24481 | 52.375127 | 0.9904933 | 0.00111112 | 5.016    |
| gi 194043036 ref XM_001924558.1 | turquoise    | 335.79982 | 63.002716 | 0.5487884 | 0.33811915 | 4.598    |
| gi 194043042 ref XM_001926896.1 | blue         | 933.6651  | 136.46874 | 0.9718427 | 0.00564777 | 15.704   |
| gi 194043052 ref XM_001927455.1 | turquoise    | 148.90707 | 57.341908 | 0.5735408 | 0.31203479 | 18.556   |
| gi 194043063 ref XM_001925272.1 | brown        | 665.2763  | 117.82633 | 0.9612946 | 0.00908769 | 18.848   |
| gi 194043066 ref XM_001928232.1 | violet       | 962.41645 | 45.661629 | 0.9740455 | 0.00499984 | 43.462   |
| gi 194043070 ref XM_001928504.1 | grey60       | 315.42234 | 68.360951 | 0.9965234 | 0.00024595 | 12.764   |
| gi 194043072 ref XM_001925326.1 | green        | 777.98162 | 113.00633 | 0.9934924 | 0.00062956 | 4.972    |
| gi 194043074 ref XM_001928487.1 | green        | 951.60027 | 103.56812 | 0.9680557 | 0.00682075 | 16.196   |
| gi 194043076 ref XM_001925356.1 | midnightblue | 900.65753 | 69.810649 | 0.9737021 | 0.00509911 | 26.668   |
| gi 194043112 ref XM_001929270.1 | turquoise    | 610.86532 | 180.04847 | 0.9336943 | 0.02029052 | 52.218   |
| gi 194043122 ref XM_001929345.1 | blue         | 983.28912 | 132.62897 | 0.9643577 | 0.00803428 | 8.904    |
| gi 194043175 ref XM_001928565.1 | turquoise    | 282.19005 | 103.4893  | 0.7651475 | 0.13170507 | 7.024    |
| gi 194043187 ref XM_001925978.1 | blue         | 778.38699 | 144.58624 | 0.9877422 | 0.00162612 | 19.756   |
| gi 194043225 ref XM_001929262.1 | turquoise    | 821.0155  | 208.48957 | 0.9544693 | 0.01158248 | 7.074    |
| gi 194043233 ref XM_001929306.1 | turquoise    | 765.61443 | 181.91791 | 0.9023138 | 0.03610899 | 11.532   |
| gi 194043243 ref XM_001924074.1 | salmon       | 240.03255 | 72.202984 | 0.9818908 | 0.00291742 | 68.692   |
| gi 194043277 ref XM_001927490.1 | turquoise    | 745.36549 | 189.68249 | 0.915638  | 0.02903892 | 7.862    |
| gi 194043291 ref XM_001928076.1 | white        | 776.02337 | 39.023284 | 0.9488966 | 0.01376103 | 43.526   |
| gi 194043329 ref XM_001929273.1 | turquoise    | 110.67801 | 36.836705 | 0.4647255 | 0.43034122 | 39.418   |
| gi 194043337 ref XM_001926296.1 | red          | 873.43045 | 126.71235 | 0.9979419 | 0.00011205 | 14.72    |
| gi 194043361 ref XM_001929445.1 | pink         | 974.37121 | 142.46464 | 0.989176  | 0.00134961 | 4.718    |
| gi 194043363 ref XM_001929468.1 | lightcyan    | 461.42552 | 58.094293 | 0.9880057 | 0.00157403 | 162.84   |
| gi 194043378 ref XM_001929539.1 | blue         | 839.48609 | 142.23075 | 0.9830169 | 0.00265003 | 5.072    |
| gi 194043405 ref XM_001929590.1 | grey60       | 303.10148 | 65.530454 | 0.9875904 | 0.00165638 | 16.642   |
| gi 194043439 ref XM_001927481.1 | darkgrey     | 1015.3843 | 49.910834 | 0.9792576 | 0.00357492 | 8.568    |
| gi 194043453 ref XM_001927547.1 | brown        | 672.56331 | 128.81169 | 0.9823542 | 0.00280635 | 3.338    |
| gi 194043490 ref XM_001927785.1 | white        | 901.36265 | 46.021506 | 0.9710691 | 0.00588143 | 12.622   |
| gi 194043531 ref XM_001926134.1 | midnightblue | 775.52123 | 71.594942 | 0.9791403 | 0.00360523 | 4.45     |
| gi 194043583 ref XM_001928616.1 | yellow       | 282.90392 | 113.47361 | 0.9564608 | 0.01083422 | 5.662    |
| gi 194043591 ref XM_001927268.1 | brown        | 664.80346 | 127.96415 | 0.9849968 | 0.00220105 | 17.698   |
| gi 194043669 ref XM_001924741.1 | brown        | 763.00413 | 130.12626 | 0.98212   | 0.00286231 | 23.884   |
| gi 194043695 ref XM_001925613.1 | blue         | 721.59421 | 145.14838 | 0.9890988 | 0.00136407 | 1.824    |
| gi 194043731 ref XM_001926974.1 | greenyellow  | 59.378975 | 12.868511 | 0.3536842 | 0.55924851 | 12.594   |
| gi 194043848 ref XM_001928131.1 | red          | 819.82323 | 120.92182 | 0.9884509 | 0.00148731 | 10.556   |
| gi 194043858 ref XM_001928335.1 | turquoise    | 304.25965 | 110.38724 | 0.7955778 | 0.10748285 | 76.054   |
| gi 194043900 ref XM_001924998.1 | turquoise    | 1015.4742 | 211.12644 | 0.9349593 | 0.01971645 | 39.902   |
| gi 194043908 ref XM_001927890.1 | turquoise    | 974.0854  | 225.79752 | 0.9714591 | 0.00576326 | 9.248    |
| gi 194043935 ref XM_001924322.1 | green        | 446.66972 | 66.922288 | 0.8791116 | 0.0495307  | 1.484    |
| gi 194043951 ref XM_001927705.1 | darkgreen    | 181.40545 | 32.678214 | 0.9170676 | 0.02831019 | 13.102   |
| gi 194043957 ref XM_001925803.1 | skyblue      | 360.95422 | 37.847906 | 0.9652311 | 0.0077418  | 3064.368 |
| gi 194043959 ref XM_001927448.1 | white        | 697.08564 | 39.73389  | 0.9019631 | 0.03630163 | 6.996    |
| gi 194043976 ref XM_001928406.1 | brown        | 793.08424 | 120.81544 | 0.9617727 | 0.0089205  | 4.504    |
| gi 194044012 ref XM_001927891.1 | turquoise    | 609.80416 | 176.86295 | 0.904452  | 0.03494152 | 17.09    |
| gi 194044032 ref XM_001928774.1 | brown        | 788.83163 | 118.89265 | 0.965297  | 0.0077199  | 20.81    |
| gi 194044034 ref XM_001928794.1 | brown        | 766.13486 | 119.1398  | 0.9585327 | 0.01007333 | 118.444  |
| gi 194044044 ref XM_001927332.1 | tan          | 145.22068 | 44.04279  | 0.9697189 | 0.00629664 | 4.438    |

|                                 |               |           |           |           |            |         |
|---------------------------------|---------------|-----------|-----------|-----------|------------|---------|
| gi 194044110 ref XM_001924775.1 | darkred       | 184.67848 | 44.289216 | 0.9829432 | 0.00266726 | 24.15   |
| gi 194044123 ref XM_001926788.1 | black         | 684.2301  | 91.981529 | 0.9652811 | 0.00772517 | 20.748  |
| gi 194044132 ref XM_001927798.1 | greenyellow   | 100.37967 | 20.225648 | 0.8021294 | 0.10246513 | 15.31   |
| gi 194044163 ref XM_001924534.1 | turquoise     | 142.77867 | 44.66972  | 0.5124511 | 0.37733052 | 32.086  |
| gi 194044169 ref XM_001924460.1 | midnightblue  | 802.86189 | 63.303291 | 0.9535368 | 0.01193842 | 37.84   |
| gi 194044196 ref XM_001928527.1 | turquoise     | 169.38473 | 51.077948 | 0.43645   | 0.46247911 | 16.842  |
| gi 194044237 ref XM_001927396.1 | darkgrey      | 753.72895 | 47.573637 | 0.9709691 | 0.00591187 | 15.104  |
| gi 194044271 ref XM_001926068.1 | pink          | 688.92996 | 121.39168 | 0.9577433 | 0.0103611  | 6.476   |
| gi 194044273 ref XM_001926112.1 | violet        | 960.90105 | 45.259512 | 0.9724035 | 0.00548036 | 8.988   |
| gi 194044289 ref XM_001926487.1 | darkmagenta   | 174.98044 | 8.0638952 | 0.8543071 | 0.06527778 | 56.314  |
| gi 194044331 ref XM_001925019.1 | purple        | 255.03097 | 69.921469 | 0.9692718 | 0.00643616 | 16.212  |
| gi 194044358 ref XM_001928282.1 | turquoise     | 103.17512 | 27.165352 | 0.3977236 | 0.5072895  | 9.698   |
| gi 194044362 ref XM_001926993.1 | lightcyan     | 700.04135 | 44.061534 | 0.8938497 | 0.04084857 | 21.558  |
| gi 194044424 ref XM_001927947.1 | pink          | 894.62975 | 149.62591 | 0.9996875 | 6.63E-06   | 0.45    |
| gi 194044465 ref XM_001928874.1 | magenta       | 422.0434  | 77.656906 | 0.9682882 | 0.00674666 | 39.924  |
| gi 194044483 ref XM_001929150.1 | darkorange    | 102.44799 | 10.888755 | 0.6201265 | 0.26445313 | 160.252 |
| gi 194044504 ref XM_001927363.1 | greenyellow   | 52.740469 | 11.922616 | 0.3900562 | 0.51626261 | 53.778  |
| gi 194044550 ref XM_001927682.1 | brown         | 139.07506 | 16.504478 | 0.5320572 | 0.35604277 | 108.86  |
| gi 194044572 ref XM_001925488.1 | turquoise     | 307.72986 | 111.20831 | 0.7266049 | 0.16438225 | 7.666   |
| gi 194044576 ref XM_001925640.1 | tan           | 249.1473  | 41.045529 | 0.9419039 | 0.01666221 | 16.362  |
| gi 194044593 ref XM_001929063.1 | white         | 903.95455 | 42.664716 | 0.9733234 | 0.00520937 | 35.416  |
| gi 194044597 ref XM_001926862.1 | brown         | 637.58798 | 114.86296 | 0.9546814 | 0.01150203 | 11.608  |
| gi 194044682 ref XM_001928813.1 | turquoise     | 191.79321 | 76.025513 | 0.5896417 | 0.29535864 | 10.456  |
| gi 194044686 ref XM_001928889.1 | pink          | 972.64037 | 143.59552 | 0.9908295 | 0.00105275 | 5.378   |
| gi 194044696 ref XM_001926221.1 | paleturquoise | 178.21086 | 26.39031  | 0.9757171 | 0.0045258  | 16.596  |
| gi 194044738 ref XM_001929453.1 | pink          | 894.62975 | 149.62591 | 0.9996875 | 6.63E-06   | 0.128   |
| gi 194044782 ref XM_001926654.1 | darkred       | 163.90271 | 40.136447 | 0.9603293 | 0.00942838 | 43.064  |
| gi 194044788 ref XM_001928382.1 | brown         | 562.20956 | 119.36572 | 0.9748401 | 0.00477257 | 2.88    |
| gi 194044819 ref XM_001926406.1 | blue          | 944.16717 | 139.72657 | 0.9767757 | 0.0042338  | 21.8    |
| gi 194044859 ref XM_001927209.1 | purple        | 233.11406 | 45.067747 | 0.8684131 | 0.05615514 | 21.206  |
| gi 194044861 ref XM_001927107.1 | white         | 960.14731 | 45.37614  | 0.9901273 | 0.00117584 | 4.446   |
| gi 194044921 ref XM_001927440.1 | navy          | 1014.667  | 17.465744 | 0.0793997 | 0.89901151 | 10.232  |
| gi 194044929 ref XM_001925991.1 | blue          | 913.58066 | 150.60397 | 0.9956277 | 0.00034683 | 2.094   |
| gi 194044943 ref XM_001926010.1 | violet        | 894.62975 | 47.034779 | 0.9933959 | 0.00064361 | 1.668   |
| gi 194044951 ref XM_001925471.1 | turquoise     | 293.92977 | 108.7085  | 0.7698354 | 0.12787875 | 3.992   |
| gi 194045002 ref XM_001926288.1 | darkgreen     | 158.06636 | 29.787986 | 0.8832479 | 0.04704085 | 206.036 |
| gi 194045026 ref XM_001925965.1 | darkorange    | 217.25696 | 23.843359 | 0.8994709 | 0.03768007 | 20.438  |
| gi 194045094 ref XM_001925372.1 | lightgreen    | 215.32052 | 25.998059 | 0.8359156 | 0.077794   | 9.874   |
| gi 194045111 ref XM_001927898.1 | turquoise     | 869.61445 | 198.64123 | 0.9304446 | 0.02178944 | 19.252  |
| gi 194271212 gb EU714326.1      | black         | 719.61622 | 104.55526 | 0.9911628 | 0.00099594 | 3.06    |
| gi 194332486 ref NM_001130213.1 | navy          | 100.39154 | 36.498469 | 0.923664  | 0.02502603 | 20.552  |
| gi 194474047 ref NM_001130535.1 | orange        | 283.47359 | 37.28858  | 0.9967652 | 0.00022075 | 51.062  |
| gi 194474049 ref NM_001130531.1 | blue          | 866.26294 | 148.06159 | 0.99194   | 0.00086759 | 1.246   |
| gi 195539469 ref NM_001130733.1 | skyblue       | 563.3461  | 43.154678 | 0.9917727 | 0.00089472 | 74.936  |
| gi 195539471 ref NM_001130734.1 | lightgreen    | 405.54705 | 38.152809 | 0.914042  | 0.02985951 | 0.668   |
| gi 196259975 ref NM_001131045.1 | turquoise     | 559.85873 | 174.39653 | 0.9340572 | 0.02012529 | 17.784  |
| gi 197717772 gb EF113595.2      | green         | 962.34348 | 103.13851 | 0.9674171 | 0.00702561 | 28.898  |
| gi 198282078 ref NM_001134823.1 | brown         | 784.77117 | 131.75287 | 0.9861704 | 0.00194825 | 224.672 |

|                                   |               |           |           |           |            |          |
|-----------------------------------|---------------|-----------|-----------|-----------|------------|----------|
| gi 19919837 gb AF490841.1         | black         | 840.33362 | 105.60694 | 0.9929465 | 0.00071036 | 19.942   |
| gi 201066357 ref NM_001134968.1   | violet        | 43.447027 | 9.9570167 | -0.988069 | 0.00156169 | 2362.302 |
| gi 209863050 ref NM_001135960.1   | yellow        | 236.80635 | 110.01988 | 0.9515798 | 0.01269679 | 213.644  |
| gi 209954779 ref NM_214223.2      | blue          | 582.23761 | 111.06239 | 0.9297789 | 0.02210075 | 5.566    |
| gi 211578395 ref NM_001136510.1   | black         | 858.19332 | 91.600703 | 0.9623939 | 0.00870474 | 28.856   |
| gi 212549664 ref NM_001137639.1   | tan           | 80.84378  | 13.861913 | 0.6371204 | 0.24762618 | 51.934   |
| gi 213021240 ref NM_001139472.1   | lightcyan     | 616.81354 | 52.53356  | 0.9464867 | 0.0147404  | 5.098    |
| gi 217416473 ref NM_001142668.1   | blue          | 848.52359 | 148.00783 | 0.9930129 | 0.00070036 | 7.682    |
| gi 217416475 ref NM_001142669.1   | skyblue       | 497.60461 | 44.332118 | 0.9986881 | 5.70E-05   | 6.856    |
| gi 218082010 ref NM_001142666.1   | blue          | 532.34919 | 99.90484  | 0.9057887 | 0.03421796 | 19.924   |
| gi 2286009 emb AJ000786.1         | turquoise     | 558.2772  | 139.4046  | 0.8143567 | 0.09329824 | 23.566   |
| gi 2286014 emb AJ000791.1         | white         | 173.57387 | 13.306732 | -0.720632 | 0.16963135 | 108.042  |
| gi 29150628 gb AY216477.1         | tan           | 198.31645 | 45.939559 | 0.9746428 | 0.00482866 | 37.546   |
| gi 33772282 gb AY346132.1 AY34613 | violet        | 979.84316 | 43.916322 | 0.9611494 | 0.00913867 | 9.35     |
| gi 34582610 gb AY368623.1         | green         | 969.31982 | 107.11034 | 0.977184  | 0.00412288 | 24.29    |
| gi 35384837 gb AY374470.1         | turquoise     | 265.51305 | 89.49111  | 0.6366006 | 0.24813643 | 45.822   |
| gi 37700454 gb AY421755.1         | blue          | 542.93625 | 124.14541 | 0.9543817 | 0.01161579 | 3.106    |
| gi 4186150 emb AJ236938.1         | turquoise     | 175.64975 | 67.920966 | 0.6063106 | 0.27834819 | 33.394   |
| gi 45268992 gb AY550051.1         | lightgreen    | 211.13381 | 23.050251 | 0.7985414 | 0.10520416 | 24.488   |
| gi 45758483 gb AY553927.1         | turquoise     | 610.01067 | 184.01669 | 0.9447672 | 0.01545248 | 6.948    |
| gi 47522609 ref NM_213938.1       | magenta       | 215.53149 | 79.052233 | 0.978532  | 0.00376373 | 24.836   |
| gi 47522617 ref NM_213934.1       | brown         | 741.96288 | 133.74502 | 0.990238  | 0.00115613 | 13.422   |
| gi 47522629 ref NM_213928.1       | black         | 901.26972 | 103.22887 | 0.9880667 | 0.00156205 | 49.376   |
| gi 47522635 ref NM_213927.1       | black         | 756.90437 | 101.19015 | 0.9846125 | 0.00228603 | 65.686   |
| gi 47522641 ref NM_213922.1       | turquoise     | 259.09193 | 79.60848  | 0.6927601 | 0.19473593 | 278.802  |
| gi 47522643 ref NM_213923.1       | turquoise     | 190.56214 | 65.87216  | 0.5016763 | 0.38915482 | 15.472   |
| gi 47522659 ref NM_213914.1       | violet        | 942.14695 | 46.386162 | 0.9821696 | 0.00285044 | 8.396    |
| gi 47522661 ref NM_213911.1       | turquoise     | 1018.6875 | 210.82358 | 0.9330846 | 0.0205691  | 30.758   |
| gi 47522667 ref NM_213910.1       | darkturquoise | 184.31375 | 45.86773  | 0.9916758 | 0.00091056 | 0.116    |
| gi 47522679 ref NM_213904.1       | blue          | 921.1179  | 142.10568 | 0.9811886 | 0.00308842 | 15.414   |
| gi 47522681 ref NM_213901.1       | black         | 722.27179 | 104.07004 | 0.9902073 | 0.00116158 | 3.39     |
| gi 47522685 ref NM_213898.1       | turquoise     | 193.42182 | 72.366114 | 0.5521858 | 0.33450788 | 88.894   |
| gi 47522689 ref NM_213896.1       | turquoise     | 741.94346 | 183.27298 | 0.9177485 | 0.02796515 | 24.55    |
| gi 47522691 ref NM_213897.1       | turquoise     | 895.87726 | 196.98502 | 0.9227548 | 0.02547087 | 85.094   |
| gi 47522703 ref NM_213891.1       | lightyellow   | 458.31771 | 63.71928  | 0.9974506 | 0.00015446 | 14.29    |
| gi 47522711 ref NM_213943.1       | lightgreen    | 556.71278 | 36.954472 | 0.9179213 | 0.02787784 | 8.152    |
| gi 47522717 ref NM_213944.1       | green         | 834.61249 | 115.49361 | 0.9967846 | 0.00021877 | 20.498   |
| gi 47522719 ref NM_213945.1       | lightyellow   | 324.74072 | 56.907993 | 0.9722083 | 0.00553846 | 6.286    |
| gi 47522737 ref NM_213954.1       | yellow        | 287.71007 | 117.34384 | 0.9661605 | 0.00743454 | 372.544  |
| gi 47522751 ref NM_213961.1       | magenta       | 224.53463 | 78.552066 | 0.9778707 | 0.00393856 | 5.392    |
| gi 47522753 ref NM_213962.1       | blue          | 959.05885 | 146.03792 | 0.9874243 | 0.0016897  | 121.492  |
| gi 47522763 ref NM_213968.1       | brown         | 894.62337 | 110.3462  | 0.9419068 | 0.01666098 | 30.566   |
| gi 47522769 ref NM_213971.1       | brown         | 363.67162 | 73.810497 | 0.8633191 | 0.05939979 | 16.834   |
| gi 47522773 ref NM_213973.1       | royalblue     | 515.91429 | 59.230316 | 0.9814522 | 0.00302384 | 7.17     |
| gi 47522777 ref NM_213976.1       | black         | 729.95092 | 100.994   | 0.9843458 | 0.00234563 | 6.192    |
| gi 47522779 ref NM_213977.1       | navy          | 130.1696  | 41.787747 | 0.9740144 | 0.00500878 | 40.73    |
| gi 47522785 ref NM_213980.1       | black         | 769.21146 | 102.22761 | 0.986685  | 0.00184066 | 63.336   |
| gi 47522789 ref NM_213982.1       | grey          | 419.02228 | 15.443909 | 0.9935362 | 0.00062323 | 11.314   |

|                             |               |           |           |           |            |         |
|-----------------------------|---------------|-----------|-----------|-----------|------------|---------|
| gi 47522791 ref NM_213983.1 | yellow        | 251.19828 | 91.480864 | 0.90838   | 0.03282911 | 234.298 |
| gi 47522821 ref NM_213998.1 | lightyellow   | 457.23571 | 55.435183 | 0.9688321 | 0.00657437 | 7.882   |
| gi 47522837 ref NM_214006.1 | magenta       | 168.18365 | 62.920855 | 0.9286517 | 0.02263111 | 16.626  |
| gi 47522843 ref NM_214009.1 | tan           | 70.523875 | 16.125917 | 0.6127319 | 0.27186661 | 7.546   |
| gi 47522861 ref NM_214020.1 | darkturquoise | 209.6074  | 40.124234 | 0.9619381 | 0.00886285 | 109.848 |
| gi 47522869 ref NM_214024.1 | green         | 913.31397 | 112.10442 | 0.9878261 | 0.00160948 | 29.146  |
| gi 47522881 ref NM_214031.1 | blue          | 905.84967 | 151.10604 | 0.9962677 | 0.00027356 | 9.49    |
| gi 47522897 ref NM_214039.1 | salmon        | 226.63455 | 64.970163 | 0.9585084 | 0.01008214 | 85.154  |
| gi 47522913 ref NM_214049.1 | lightgreen    | 375.69483 | 39.283857 | 0.9487295 | 0.01382825 | 15.214  |
| gi 47522915 ref NM_214050.1 | paleturquoise | 178.05471 | 23.707384 | 0.939339  | 0.01777077 | 9.304   |
| gi 47522935 ref NM_214060.1 | darkturquoise | 101.05968 | 20.101597 | 0.8103603 | 0.09626556 | 89.144  |
| gi 47522937 ref NM_214061.1 | lightcyan     | 167.17754 | 28.277902 | 0.7974982 | 0.10600461 | 12.758  |
| gi 47522939 ref NM_214062.1 | blue          | 958.25273 | 136.63086 | 0.9723545 | 0.00549492 | 70.504  |
| gi 47522941 ref NM_214063.1 | turquoise     | 986.19462 | 216.60879 | 0.9460579 | 0.01491696 | 5.756   |
| gi 47522943 ref NM_214064.1 | lightcyan     | 419.42998 | 50.145848 | 0.9499778 | 0.01332883 | 18.434  |
| gi 47522957 ref NM_214072.1 | brown         | 609.49756 | 122.92278 | 0.9819528 | 0.00290248 | 19.31   |
| gi 47522967 ref NM_214077.1 | magenta       | 289.53998 | 79.836513 | 0.9822043 | 0.00284212 | 4.57    |
| gi 47523015 ref NM_214103.1 | turquoise     | 696.61287 | 192.73204 | 0.9366428 | 0.01896082 | 48.372  |
| gi 47523035 ref NM_214114.1 | greenyellow   | 82.10059  | 15.494472 | 0.714547  | 0.17502701 | 69.22   |
| gi 47523037 ref NM_214115.1 | red           | 962.08587 | 123.05783 | 0.9911939 | 0.00099068 | 45.688  |
| gi 47523039 ref NM_214116.1 | turquoise     | 850.5423  | 202.40047 | 0.9391922 | 0.01783493 | 192.26  |
| gi 47523059 ref NM_214128.1 | lightgreen    | 234.94378 | 29.153764 | 0.8350791 | 0.07837921 | 2.152   |
| gi 47523085 ref NM_214144.1 | skyblue       | 333.50822 | 35.804342 | 0.9515675 | 0.01270162 | 22.21   |
| gi 47523093 ref NM_213884.1 | royalblue     | 398.42723 | 50.419142 | 0.9446654 | 0.01549497 | 0.988   |
| gi 47523105 ref NM_213878.1 | turquoise     | 157.07427 | 46.757231 | 0.5019812 | 0.38881908 | 44.136  |
| gi 47523187 ref NM_213830.1 | brown         | 754.35549 | 135.45958 | 0.9947564 | 0.00045544 | 2.438   |
| gi 47523195 ref NM_213826.1 | darkred       | 115.56868 | 23.887299 | 0.8039176 | 0.10110829 | 10.45   |
| gi 47523213 ref NM_213817.1 | navy          | 66.912458 | 7.818377  | -0.562513 | 0.32359073 | 13.896  |
| gi 47523231 ref NM_213804.1 | turquoise     | 208.14973 | 48.505099 | -0.294761 | 0.63020674 | 6.728   |
| gi 47523255 ref NM_213792.1 | violet        | 891.49673 | 47.021398 | 0.9945255 | 0.00048583 | 7.614   |
| gi 47523261 ref NM_213791.1 | pink          | 990.08316 | 141.39646 | 0.98755   | 0.00166446 | 4.99    |
| gi 47523273 ref NM_213785.1 | lightyellow   | 574.95719 | 52.077404 | 0.9549903 | 0.01138514 | 1.184   |
| gi 47523281 ref NM_213781.1 | purple        | 299.32478 | 79.079859 | 0.9958604 | 0.00031952 | 11.118  |
| gi 47523317 ref NM_213763.1 | royalblue     | 764.31286 | 59.569305 | 0.9815983 | 0.00298827 | 5.3     |
| gi 47523403 ref NM_214157.1 | yellow        | 268.01585 | 125.66417 | 0.983462  | 0.0025467  | 10.046  |
| gi 47523419 ref NM_214166.1 | turquoise     | 313.04042 | 99.778657 | 0.7157629 | 0.17394496 | 18.3    |
| gi 47523427 ref NM_214171.1 | lightcyan     | 251.47554 | 42.89359  | 0.9134352 | 0.03017343 | 10.738  |
| gi 47523443 ref NM_214181.1 | turquoise     | 282.19523 | 56.561508 | -0.133892 | 0.83003371 | 8.858   |
| gi 47523445 ref NM_214183.1 | midnightblue  | 658.23467 | 67.49596  | 0.9670587 | 0.00714147 | 9.8     |
| gi 47523457 ref NM_214189.1 | pink          | 900.21735 | 147.50177 | 0.9967891 | 0.0002183  | 2.112   |
| gi 47523461 ref NM_214192.1 | greenyellow   | 200.27602 | 40.602595 | 0.9691874 | 0.00646263 | 55.736  |
| gi 47523463 ref NM_214188.1 | green         | 521.69567 | 71.371939 | 0.8961479 | 0.03954332 | 10.1    |
| gi 47523471 ref NM_214193.1 | magenta       | 264.80187 | 72.762606 | 0.962448  | 0.00868605 | 19.79   |
| gi 47523477 ref NM_214200.1 | blue          | 946.6493  | 147.2993  | 0.9896167 | 0.00126812 | 5.728   |
| gi 47523483 ref NM_214199.1 | turquoise     | 352.23658 | 50.525865 | -0.088069 | 0.88801202 | 96.192  |
| gi 47523487 ref NM_214201.1 | navy          | 32.863867 | 12.013891 | 0.7320264 | 0.15965949 | 49.772  |
| gi 47523491 ref NM_214204.1 | grey60        | 258.17084 | 53.43162  | 0.9435446 | 0.0159654  | 385.558 |
| gi 47523501 ref NM_214213.1 | midnightblue  | 862.39933 | 71.341988 | 0.9782888 | 0.00382773 | 23.266  |

|                                |               |           |           |           |            |          |
|--------------------------------|---------------|-----------|-----------|-----------|------------|----------|
| gi 47523543 ref NM_214230.1    | blue          | 570.44841 | 119.12538 | 0.9430462 | 0.01617605 | 1.164    |
| gi 47523545 ref NM_214236.1    | lightcyan     | 276.73912 | 45.690694 | 0.9324747 | 0.02084899 | 136.106  |
| gi 47523553 ref NM_214240.1    | midnightblue  | 712.60207 | 66.899009 | 0.9655219 | 0.00764521 | 25.354   |
| gi 47523561 ref NM_214245.1    | green         | 686.56505 | 94.752599 | 0.9547065 | 0.01149252 | 12.126   |
| gi 47523569 ref NM_214249.1    | yellow        | 176.64747 | 82.234335 | 0.8844176 | 0.04634413 | 18.002   |
| gi 47523631 ref NM_214279.1    | greenyellow   | 84.987984 | 4.3001427 | 0.2516709 | 0.68297826 | 29.732   |
| gi 47523665 ref NM_214304.1    | greenyellow   | 95.757856 | 16.398276 | 0.6032304 | 0.28147152 | 20.192   |
| gi 47523669 ref NM_214306.1    | turquoise     | 976.57451 | 214.57486 | 0.9426307 | 0.01635233 | 36.024   |
| gi 47523671 ref NM_214303.1    | navy          | 41.00995  | 18.200364 | 0.7473944 | 0.14649289 | 24.248   |
| gi 47523673 ref NM_214308.1    | greenyellow   | 203.94133 | 38.823923 | 0.9508422 | 0.01298657 | 27.916   |
| gi 47523679 ref NM_214307.1    | turquoise     | 643.06501 | 163.96823 | 0.8886624 | 0.04384374 | 168.29   |
| gi 47523681 ref NM_214312.1    | orange        | 378.40452 | 33.486818 | 0.9706085 | 0.00602203 | 9.86     |
| gi 47523691 ref NM_214313.1    | turquoise     | 423.16787 | 145.16713 | 0.8693902 | 0.05553935 | 11.838   |
| gi 47523695 ref NM_214315.1    | lightgreen    | 477.33399 | 37.851269 | 0.9118829 | 0.03098124 | 5.042    |
| gi 47523697 ref NM_214320.1    | turquoise     | 319.56785 | 118.60193 | 0.8191238 | 0.08979607 | 5.196    |
| gi 47523711 ref NM_214323.1    | blue          | 639.73962 | 125.73229 | 0.9549687 | 0.01139331 | 4.032    |
| gi 47523719 ref NM_214330.1    | violet        | 39.213186 | 5.364492  | -0.769818 | 0.12789284 | 644.734  |
| gi 47523721 ref NM_214331.1    | royalblue     | 834.76267 | 51.057133 | 0.9457944 | 0.01502578 | 65.558   |
| gi 47523723 ref NM_214332.1    | salmon        | 226.17127 | 71.677982 | 0.9808628 | 0.00316884 | 355.768  |
| gi 47523725 ref NM_214333.1    | black         | 831.63531 | 108.68902 | 0.9992147 | 2.64E-05   | 33.152   |
| gi 47523737 ref NM_214339.1    | pink          | 865.35452 | 141.99287 | 0.9891634 | 0.00135197 | 31.594   |
| gi 47523743 ref NM_214342.1    | yellow        | 310.61843 | 130.03801 | 0.9906292 | 0.0010874  | 26.838   |
| gi 47523769 ref NM_214356.1    | darkorange    | 85.78232  | 26.056055 | 0.8925698 | 0.04158135 | 27.37    |
| gi 47523779 ref NM_214361.1    | green         | 790.90509 | 111.91421 | 0.9905577 | 0.00109985 | 105.712  |
| gi 47523785 ref NM_214364.1    | black         | 768.02918 | 107.94899 | 0.997978  | 0.00010911 | 28.87    |
| gi 47523789 ref NM_214366.1    | turquoise     | 405.75022 | 122.40089 | 0.7730515 | 0.12527318 | 75.766   |
| gi 47523799 ref NM_214372.1    | black         | 761.01555 | 102.10365 | 0.9864363 | 0.00189241 | 34.022   |
| gi 47523805 ref NM_214375.1    | blue          | 938.48582 | 144.81837 | 0.9862952 | 0.00192197 | 527.014  |
| gi 47523817 ref NM_214381.1    | yellow        | 139.40698 | 56.56788  | 0.800619  | 0.10361546 | 52.706   |
| gi 47523835 ref NM_214391.1    | purple        | 240.29538 | 63.899513 | 0.9479217 | 0.01415458 | 24.604   |
| gi 47523845 ref NM_214396.1    | green         | 253.50947 | 40.923908 | 0.775529  | 0.123277   | 701.55   |
| gi 47523847 ref NM_214397.1    | blue          | 947.16108 | 140.07448 | 0.9784772 | 0.00377811 | 40.92    |
| gi 47523867 ref NM_214407.1    | darkgrey      | 673.18735 | 42.210115 | 0.9464513 | 0.01475496 | 85.436   |
| gi 47523869 ref NM_214408.1    | navy          | 109.02879 | 35.371553 | 0.9534456 | 0.01197342 | 74.202   |
| gi 47523875 ref NM_214409.1    | lightcyan     | 312.93312 | 38.970663 | 0.8984567 | 0.0382457  | 364.676  |
| gi 47523887 ref NM_214418.1    | blue          | 600.04587 | 130.62949 | 0.9661204 | 0.0074477  | 54.658   |
| gi 47523931 ref NM_214440.1    | lightgreen    | 410.82435 | 38.051768 | 0.9117831 | 0.03103344 | 3.146    |
| gi 48374062 ref NM_001001535.1 | tan           | 118.09508 | 24.474901 | 0.7975838 | 0.10593884 | 4157.498 |
| gi 48374066 ref NM_001001537.1 | lightyellow   | 517.60664 | 55.466353 | 0.9687547 | 0.0065988  | 4.024    |
| gi 48374070 ref NM_001001539.1 | turquoise     | 452.05397 | 60.216545 | 0.1580275 | 0.7996337  | 35.688   |
| gi 48675942 ref NM_001001640.1 | turquoise     | 146.2046  | 48.289231 | 0.467989  | 0.42666548 | 7.22     |
| gi 48675944 ref NM_001001637.1 | royalblue     | 695.86987 | 63.71155  | 0.9972637 | 0.00017175 | 27.854   |
| gi 48675952 ref NM_001001643.1 | brown         | 748.01322 | 122.57676 | 0.9657219 | 0.00757904 | 89.962   |
| gi 48675956 ref NM_001001645.1 | darkred       | 195.64174 | 41.217292 | 0.9524548 | 0.01235582 | 70.016   |
| gi 48976064 ref NM_001001649.2 | turquoise     | 158.89505 | 37.587784 | -0.287386 | 0.63919    | 65.286   |
| gi 48976128 ref NM_001001770.1 | royalblue     | 633.03006 | 58.605744 | 0.9801812 | 0.0033393  | 56.194   |
| gi 49274614 ref NM_001001860.1 | red           | 887.98496 | 126.39506 | 0.9972735 | 0.00017083 | 38.73    |
| gi 49274638 ref NM_001001861.1 | darkturquoise | 186.3246  | 46.670554 | 0.9960825 | 0.00029417 | 5.282    |



|                                |              |           |           |           |            |         |
|--------------------------------|--------------|-----------|-----------|-----------|------------|---------|
| gi 50979302 ref NM_214301.1    | lightcyan    | 397.996   | 57.365728 | 0.9890699 | 0.00136948 | 93.422  |
| gi 51491905 ref NM_001003924.1 | turquoise    | 257.54402 | 55.27605  | -0.182574 | 0.76883799 | 10.4    |
| gi 51592110 ref NM_001004031.1 | turquoise    | 761.23755 | 194.8211  | 0.9364176 | 0.01906135 | 14.142  |
| gi 51592138 ref NM_001004045.1 | green        | 893.78475 | 115.8979  | 0.9977417 | 0.00012878 | 5.894   |
| gi 52350674 gb AY609390.1      | orange       | 301.62196 | 36.302888 | 0.9914796 | 0.0009429  | 11.004  |
| gi 52350683 gb AY609399.1      | turquoise    | 901.18544 | 212.91756 | 0.9568902 | 0.01067503 | 18.658  |
| gi 52350685 gb AY609401.1      | turquoise    | 264.70895 | 97.510539 | 0.668595  | 0.21727415 | 2.028   |
| gi 52350686 gb AY609402.1      | orange       | 76.528363 | 13.854706 | 0.7124091 | 0.17693434 | 20.884  |
| gi 52350700 gb AY609415.1      | brown        | 148.31214 | 15.032859 | 0.4328214 | 0.46664007 | 12.49   |
| gi 52350704 gb AY609419.1      | turquoise    | 402.18263 | 61.586662 | 0.0584013 | 0.92568349 | 14.132  |
| gi 52350710 gb AY609425.1      | blue         | 472.45846 | 60.58929  | 0.8089304 | 0.09733415 | 32.048  |
| gi 52350723 gb AY609438.1      | darkgreen    | 140.69343 | 19.816713 | 0.7995237 | 0.10445208 | 52.646  |
| gi 52350726 gb AY609441.1      | greenyellow  | 199.84395 | 39.024437 | 0.9886919 | 0.00144106 | 30.97   |
| gi 52350728 gb AY609443.1      | greenyellow  | 183.69752 | 37.834424 | 0.9785528 | 0.00375826 | 29.572  |
| gi 52350742 gb AY609457.1      | navy         | 112.63095 | 33.79654  | 0.9059051 | 0.03415514 | 138.978 |
| gi 52351065 gb AY609470.1      | turquoise    | 792.32141 | 197.23587 | 0.9483861 | 0.01396666 | 17.778  |
| gi 52351066 gb AY609471.1      | lightcyan    | 496.65111 | 57.16011  | 0.9786281 | 0.00373854 | 4.74    |
| gi 52351067 gb AY609472.1      | midnightblue | 900.22358 | 67.491171 | 0.9664649 | 0.00733477 | 13.428  |
| gi 52351069 gb AY609474.1      | midnightblue | 802.72916 | 69.43348  | 0.9734821 | 0.00516308 | 8.818   |
| gi 52351072 gb AY609477.1      | royalblue    | 653.65144 | 58.14231  | 0.9785032 | 0.00377128 | 48.514  |
| gi 52351075 gb AY609480.1      | darkred      | 143.71837 | 34.799889 | 0.915637  | 0.02903945 | 7.784   |
| gi 52351083 gb AY609488.1      | violet       | 179.3741  | 8.2619225 | 0.2976799 | 0.62665674 | 37.894  |
| gi 52351086 gb AY609491.1      | violet       | 206.76414 | 7.5344979 | 0.1592572 | 0.79808783 | 45.258  |
| gi 52351090 gb AY609495.1      | orange       | 169.24546 | 29.107852 | 0.9402984 | 0.01735342 | 157.554 |
| gi 52351095 gb AY609500.1      | midnightblue | 865.17774 | 77.762007 | 0.9967265 | 0.00022472 | 18.722  |
| gi 52351120 gb AY609525.1      | blue         | 997.06725 | 123.7863  | 0.9476976 | 0.01424554 | 20.698  |
| gi 52351125 gb AY609530.1      | black        | 654.01013 | 93.953272 | 0.9686266 | 0.0066393  | 8.09    |
| gi 52351148 gb AY609553.1      | tan          | 81.259891 | 15.789798 | 0.6831513 | 0.20361496 | 68.642  |
| gi 52351153 gb AY609558.1      | turquoise    | 553.09126 | 165.7487  | 0.889918  | 0.04311255 | 10.114  |
| gi 52351155 gb AY609560.1      | grey60       | 300.86325 | 65.885178 | 0.9893507 | 0.00131711 | 45.722  |
| gi 52351156 gb AY609561.1      | red          | 878.09122 | 126.14479 | 0.9969996 | 0.0001972  | 14.376  |
| gi 52351160 gb AY609565.1      | blue         | 760.39243 | 148.25967 | 0.9936679 | 0.00060428 | 7.6     |
| gi 52351167 gb AY609572.1      | white        | 910.69065 | 47.541908 | 0.9786859 | 0.0037234  | 125.772 |
| gi 52351176 gb AY609581.1      | pink         | 978.17043 | 135.54147 | 0.9789688 | 0.00364968 | 3.664   |
| gi 52351185 gb AY609590.1      | salmon       | 231.51412 | 70.078468 | 0.9754341 | 0.00460495 | 11.61   |
| gi 52351201 gb AY609606.1      | turquoise    | 333.03163 | 57.017786 | -0.075925 | 0.90342186 | 54.084  |
| gi 52351209 gb AY609612.1      | darkgrey     | 877.35865 | 52.802857 | 0.9927564 | 0.00073925 | 56.918  |
| gi 52351212 gb AY609615.1      | greenyellow  | 224.14363 | 40.291403 | 0.9797657 | 0.00344464 | 22.03   |
| gi 52351257 gb AY609689.1      | yellow       | 248.67806 | 99.341334 | 0.9278739 | 0.02299945 | 120.21  |
| gi 52351277 gb AY609709.1      | red          | 962.98044 | 120.37439 | 0.986786  | 0.00181979 | 39.988  |
| gi 52351285 gb AY609717.1      | salmon       | 224.50195 | 70.474277 | 0.9774503 | 0.00405107 | 3.866   |
| gi 52351294 gb AY609726.1      | purple       | 272.90593 | 77.032578 | 0.9922066 | 0.00082493 | 15.618  |
| gi 52351296 gb AY609728.1      | green        | 794.99946 | 87.277104 | 0.931363  | 0.02136234 | 36.134  |
| gi 52351300 gb AY609732.1      | purple       | 250.59322 | 66.786327 | 0.9567946 | 0.01071041 | 46.658  |
| gi 52351303 gb AY609735.1      | blue         | 905.50147 | 128.64369 | 0.9575722 | 0.01042381 | 4.898   |
| gi 52351323 gb AY609755.1      | royalblue    | 817.73131 | 57.041197 | 0.9713427 | 0.00579844 | 28.266  |
| gi 52351333 gb AY609765.1      | lightcyan    | 554.83445 | 55.087489 | 0.9659689 | 0.00749753 | 16.408  |
| gi 52351341 gb AY609773.1      | greenyellow  | 147.54086 | 17.720435 | 0.6558641 | 0.22941964 | 4.498   |

|                           |               |           |           |           |            |         |
|---------------------------|---------------|-----------|-----------|-----------|------------|---------|
| gi 52351346 gb AY609778.1 | orange        | 128.86354 | 23.916021 | 0.8822292 | 0.04765028 | 44.014  |
| gi 52351351 gb AY609781.1 | greenyellow   | 142.52231 | 24.724382 | 0.766359  | 0.13071301 | 21.456  |
| gi 52351368 gb AY609798.1 | brown         | 530.84451 | 107.70945 | 0.9515693 | 0.01270091 | 10.22   |
| gi 52351373 gb AY609803.1 | blue          | 899.76878 | 146.72124 | 0.989194  | 0.00134625 | 53.04   |
| gi 52351374 gb AY609804.1 | darkred       | 186.12321 | 40.114718 | 0.9451362 | 0.01529877 | 10.224  |
| gi 52351378 gb AY609808.1 | pink          | 899.24766 | 146.39644 | 0.9952084 | 0.00039787 | 5.546   |
| gi 52351391 gb AY609821.1 | turquoise     | 868.80554 | 196.7122  | 0.9269497 | 0.0234396  | 6.978   |
| gi 52351393 gb AY609823.1 | navy          | 276.09236 | 23.491315 | 0.862543  | 0.05989918 | 9.27    |
| gi 52351397 gb AY609827.1 | turquoise     | 207.84859 | 77.390247 | 0.6935072 | 0.19405029 | 8.394   |
| gi 52351406 gb AY609836.1 | darkgreen     | 254.06684 | 43.487639 | 0.9973733 | 0.00016154 | 126.928 |
| gi 52351416 gb AY609846.1 | turquoise     | 863.54055 | 190.26343 | 0.9097038 | 0.03212676 | 25.244  |
| gi 52351419 gb AY609849.1 | greenyellow   | 45.592831 | 7.6382168 | 0.3065394 | 0.61590364 | 48.642  |
| gi 52351430 gb AY609860.1 | blue          | 882.44182 | 103.18282 | 0.9064951 | 0.0338375  | 14.472  |
| gi 52351432 gb AY609862.1 | navy          | 74.52256  | 9.3439201 | -0.810659 | 0.09604269 | 41.984  |
| gi 52351435 gb AY609865.1 | turquoise     | 360.19923 | 119.44271 | 0.8073859 | 0.0984923  | 5.622   |
| gi 52351436 gb AY609866.1 | darkorange    | 116.79586 | 33.912466 | 0.9766286 | 0.00427397 | 39.636  |
| gi 52351444 gb AY609874.1 | brown         | 909.18237 | 107.83027 | 0.9372112 | 0.01870786 | 53.938  |
| gi 52351447 gb AY609877.1 | magenta       | 384.01805 | 76.213304 | 0.967253  | 0.00707859 | 35.67   |
| gi 52351453 gb AY609883.1 | salmon        | 253.18866 | 65.511068 | 0.9604605 | 0.00938183 | 15.078  |
| gi 52351454 gb AY609884.1 | lightgreen    | 641.74309 | 31.219329 | 0.8934789 | 0.04106043 | 28.722  |
| gi 52351457 gb AY609887.1 | blue          | 625.38733 | 79.03973  | 0.8534657 | 0.06583532 | 59.952  |
| gi 52351462 gb AY609892.1 | magenta       | 197.81725 | 64.958599 | 0.9361852 | 0.01916527 | 10.786  |
| gi 52351474 gb AY609904.1 | orange        | 319.50582 | 11.31583  | 0.7118336 | 0.17744877 | 99.664  |
| gi 52351476 gb AY609906.1 | greenyellow   | 217.83596 | 39.030101 | 0.9691805 | 0.0064648  | 31.694  |
| gi 52351490 gb AY609920.1 | turquoise     | 259.13542 | 86.072    | 0.7233838 | 0.16720691 | 18.352  |
| gi 52351500 gb AY609930.1 | darkturquoise | 159.63181 | 39.675429 | 0.9541415 | 0.01170721 | 18.7    |
| gi 52351521 gb AY609951.1 | grey60        | 274.20339 | 60.097827 | 0.9699135 | 0.00623622 | 156.176 |
| gi 52351524 gb AY609954.1 | darkgreen     | 233.62172 | 42.213788 | 0.9886507 | 0.00144892 | 14.01   |
| gi 52351527 gb AY609957.1 | turquoise     | 260.12905 | 87.002372 | 0.6574643 | 0.2278831  | 27.04   |
| gi 52351536 gb AY609966.1 | darkgrey      | 930.67878 | 50.713732 | 0.9840149 | 0.00242027 | 23.156  |
| gi 52351538 gb AY609968.1 | pink          | 796.98709 | 143.27085 | 0.9909026 | 0.0010402  | 40.888  |
| gi 52351540 gb AY609970.1 | black         | 850.28788 | 108.1573  | 0.9981625 | 9.45E-05   | 4.302   |
| gi 52351544 gb AY609974.1 | turquoise     | 952.22528 | 201.29561 | 0.9231155 | 0.0252941  | 20.48   |
| gi 52351547 gb AY609977.1 | turquoise     | 536.20585 | 157.92578 | 0.8791103 | 0.04953148 | 28.904  |
| gi 52351567 gb AY609997.1 | grey60        | 233.9363  | 49.469639 | 0.9279725 | 0.02295266 | 22.476  |
| gi 52351573 gb AY610003.1 | turquoise     | 451.75321 | 150.22894 | 0.8723038 | 0.05371585 | 8.152   |
| gi 52351582 gb AY610012.1 | green         | 862.05545 | 117.02501 | 0.9998866 | 1.45E-06   | 9.526   |
| gi 52351587 gb AY610017.1 | pink          | 747.94482 | 138.02522 | 0.983187  | 0.00261039 | 108.904 |
| gi 52351591 gb AY610021.1 | violet        | 929.76947 | 45.942237 | 0.9789143 | 0.00366385 | 9.898   |
| gi 52351593 gb AY610023.1 | turquoise     | 977.55984 | 223.6631  | 0.966925  | 0.00718484 | 16.17   |
| gi 52351594 gb AY610024.1 | tan           | 107.06844 | 31.910103 | 0.8681171 | 0.05634209 | 86.354  |
| gi 52351609 gb AY610039.1 | tan           | 125.22725 | 30.189932 | 0.8575911 | 0.06311576 | 60.022  |
| gi 52351611 gb AY610041.1 | darkgrey      | 901.88333 | 52.77344  | 0.9925275 | 0.00077454 | 14.584  |
| gi 52351614 gb AY610044.1 | turquoise     | 831.2514  | 219.03897 | 0.9851611 | 0.00216504 | 12.016  |
| gi 52351621 gb AY610051.1 | royalblue     | 680.25157 | 62.903111 | 0.9944625 | 0.00049425 | 26.502  |
| gi 52351639 gb AY610069.1 | turquoise     | 555.73167 | 167.69548 | 0.9174269 | 0.02812794 | 69.738  |
| gi 52351674 gb AY610104.1 | blue          | 824.34869 | 142.08476 | 0.9827018 | 0.002724   | 5.286   |
| gi 52351676 gb AY610106.1 | pink          | 927.44147 | 148.08803 | 0.9974679 | 0.0001529  | 27.404  |

|                                |               |           |           |           |            |          |
|--------------------------------|---------------|-----------|-----------|-----------|------------|----------|
| gi 52351677 gb AY610107.1      | blue          | 985.84737 | 125.11504 | 0.9501895 | 0.01324475 | 39.346   |
| gi 52351697 gb AY610127.1      | purple        | 275.88109 | 67.212543 | 0.9581524 | 0.01021164 | 2090.66  |
| gi 52351702 gb AY610132.1      | midnightblue  | 897.80969 | 78.450167 | 0.9984586 | 7.26E-05   | 26.78    |
| gi 52351709 gb AY610139.1      | lightcyan     | 301.80879 | 42.823472 | 0.9232116 | 0.02524703 | 13.964   |
| gi 52351717 gb AY610147.1      | turquoise     | 414.1347  | 136.94585 | 0.8091785 | 0.09714843 | 10.008   |
| gi 52351733 gb AY610163.1      | turquoise     | 159.63162 | 63.494117 | 0.5652731 | 0.32068833 | 14.27    |
| gi 52351736 gb AY610166.1      | magenta       | 351.96051 | 83.820724 | 0.9904281 | 0.00112256 | 142.87   |
| gi 52351738 gb AY610168.1      | magenta       | 95.204829 | 40.175595 | 0.8106254 | 0.09606784 | 39.4     |
| gi 52351742 gb AY610172.1      | yellow        | 228.86608 | 103.84552 | 0.9387711 | 0.01801933 | 38.57    |
| gi 52351745 gb AY610175.1      | turquoise     | 371.51768 | 132.30159 | 0.8541723 | 0.06536695 | 5.952    |
| gi 52351750 gb AY610180.1      | midnightblue  | 911.68377 | 77.767379 | 0.9966514 | 0.00023249 | 24.578   |
| gi 52351755 gb AY610185.1      | turquoise     | 461.03914 | 151.60102 | 0.8979814 | 0.03851174 | 2.432    |
| gi 52351761 gb AY610191.1      | turquoise     | 980.27821 | 206.58412 | 0.9328735 | 0.02066584 | 26.742   |
| gi 52351763 gb AY610193.1      | turquoise     | 686.69929 | 192.55713 | 0.9467457 | 0.01463412 | 48.222   |
| gi 52351796 gb AY610214.1      | grey60        | 285.69103 | 63.414831 | 0.9810221 | 0.00312943 | 77.432   |
| gi 52351803 gb AY610221.1      | green         | 790.47579 | 114.12563 | 0.9948826 | 0.00043912 | 12.622   |
| gi 52351805 gb AY610223.1      | grey60        | 283.56672 | 56.985449 | 0.9572605 | 0.01053838 | 6.87     |
| gi 52351807 gb AY610225.1      | greenyellow   | 135.83754 | 24.182241 | 0.8763466 | 0.0512176  | 77.176   |
| gi 52351871 gb AY610289.1      | darkturquoise | 199.60858 | 40.940447 | 0.961861  | 0.00888972 | 6.712    |
| gi 52351873 gb AY610291.1      | lightgreen    | 164.75646 | 21.595899 | 0.7836353 | 0.11681285 | 243.45   |
| gi 52351877 gb AY610295.1      | darkorange    | 124.19321 | 27.57462  | 0.9277766 | 0.02304566 | 155.248  |
| gi 52351890 gb AY610308.1      | red           | 577.04404 | 87.947555 | 0.9242922 | 0.0247201  | 26.934   |
| gi 52351923 gb AY610341.1      | grey60        | 313.8181  | 68.501609 | 0.997317  | 0.00016676 | 9.334    |
| gi 52351935 gb AY610353.1      | green         | 955.73873 | 111.51247 | 0.9878584 | 0.00160309 | 7.652    |
| gi 52351947 gb AY610365.1      | greenyellow   | 61.043672 | 9.9081258 | 0.4764041 | 0.41722087 | 25.522   |
| gi 52351956 gb AY610374.1      | purple        | 307.32382 | 72.751613 | 0.976143  | 0.00440754 | 130.65   |
| gi 52351961 gb AY610379.1      | brown         | 470.72814 | 97.547007 | 0.9303045 | 0.02185485 | 9.46     |
| gi 52351978 gb AY610394.1      | turquoise     | 357.19374 | 87.93174  | 0.6698378 | 0.21609828 | 140.36   |
| gi 52351995 gb AY610411.1      | lightgreen    | 287.98852 | 32.013466 | 0.887481  | 0.04453521 | 26.334   |
| gi 52352038 gb AY610454.1      | skyblue       | 403.47329 | 42.095053 | 0.9873889 | 0.00169683 | 20.708   |
| gi 52352062 gb AY610478.1      | tan           | 227.34346 | 26.795987 | 0.7937373 | 0.10890547 | 11.162   |
| gi 52352069 gb AY610485.1      | royalblue     | 468.0856  | 57.052405 | 0.9723791 | 0.0054876  | 5.11     |
| gi 52352072 gb AY610488.1      | violet        | 986.28209 | 43.932222 | 0.9603345 | 0.00942654 | 7.376    |
| gi 52352090 gb AY610506.1      | darkorange    | 114.87423 | 23.038501 | 0.8845162 | 0.04628559 | 17.466   |
| gi 52352705 gb AY609625.1      | greenyellow   | 93.312231 | 16.273484 | 0.7210988 | 0.1692192  | 61.622   |
| gi 52352724 gb AY609644.1      | black         | 859.04095 | 102.9351  | 0.9874641 | 0.00168169 | 17.168   |
| gi 52352730 gb AY609650.1      | red           | 697.84066 | 107.55704 | 0.9646535 | 0.00793484 | 64.99    |
| gi 54020965 ref NM_001005726.1 | black         | 835.65424 | 100.97853 | 0.9833182 | 0.00257992 | 56.298   |
| gi 54607194 ref NM_001006592.1 | lightyellow   | 391.27318 | 59.49712  | 0.9833101 | 0.00258181 | 8968.848 |
| gi 55741470 ref NM_214042.1    | yellow        | 262.98005 | 118.65053 | 0.9702777 | 0.00612366 | 58.81    |
| gi 55741485 ref NM_213855.1    | blue          | 468.36956 | 91.24538  | 0.88625   | 0.04525936 | 1927.712 |
| gi 55741489 ref NM_214136.1    | white         | 969.50178 | 46.961922 | 0.9880525 | 0.00156483 | 81.572   |
| gi 55741720 ref NM_001001534.1 | darkgreen     | 238.29685 | 43.084487 | 0.9926464 | 0.00075614 | 2271.864 |
| gi 55741808 ref NM_213748.1    | tan           | 252.9335  | 40.478335 | 0.9370655 | 0.0187726  | 2553.502 |
| gi 55741810 ref NM_001001863.1 | navy          | 68.769687 | 11.322116 | 0.5641569 | 0.32186129 | 5340.018 |
| gi 55741820 ref NM_214202.1    | darkred       | 208.96604 | 45.229401 | 0.981838  | 0.00293017 | 2.466    |
| gi 55742741 ref NM_213920.1    | turquoise     | 156.14195 | 52.751464 | 0.5432034 | 0.34407664 | 261.64   |
| gi 55742771 ref NM_001007191.1 | navy          | 978.93302 | 17.970736 | -0.044554 | 0.94329071 | 17.44    |

|                                   |               |           |           |           |            |          |
|-----------------------------------|---------------|-----------|-----------|-----------|------------|----------|
| gi 55742846 ref NM_214329.1       | turquoise     | 145.99234 | 25.318574 | 0.3363387 | 0.5799772  | 64.448   |
| gi 56606056 ref NM_001008481.1    | lightcyan     | 723.00309 | 44.013872 | 0.8949848 | 0.04020219 | 9.63     |
| gi 56711365 ref NM_001008688.1    | yellow        | 165.30758 | 72.341802 | 0.8549065 | 0.06488144 | 5923.556 |
| gi 56711367 ref NM_001008691.1    | magenta       | 85.946894 | 34.70276  | 0.7749639 | 0.12373144 | 18.066   |
| gi 56792875 gb AY682217.1         | white         | 278.9731  | 16.638308 | -0.594517 | 0.29035665 | 5.992    |
| gi 57527981 ref NM_001009576.1    | royalblue     | 498.15827 | 59.536679 | 0.9819571 | 0.00290144 | 10.516   |
| gi 57528034 ref NM_001009582.1    | magenta       | 152.85813 | 63.902663 | 0.9246518 | 0.02454557 | 18.254   |
| gi 58332861 ref NM_001011507.1    | greenyellow   | 89.506839 | 18.180061 | 0.764732  | 0.13204581 | 34.452   |
| gi 58801554 ref NM_001011727.1    | magenta       | 482.36163 | 66.716174 | 0.9285309 | 0.02268818 | 50.18    |
| gi 60302865 ref NM_001012613.1    | pink          | 926.77249 | 148.32899 | 0.9977798 | 0.00012554 | 3.478    |
| gi 60419073 gb AY856514.2         | paleturquoise | 149.41749 | 19.886778 | 0.9083373 | 0.03285185 | 19.602   |
| gi 61098755 gb AY820766.1         | navy          | 62.56553  | 9.2964369 | -0.71395  | 0.17555867 | 11.396   |
| gi 61696637 gb AY803100.1         | purple        | 294.15746 | 77.977648 | 0.9920263 | 0.0008537  | 3.562    |
| gi 62082661 gb AY870324.1         | lightyellow   | 318.20854 | 56.482186 | 0.9699053 | 0.00623877 | 49.048   |
| gi 6650729 gb AF116346.1 AF116346 | lightyellow   | 638.8355  | 53.853553 | 0.9569825 | 0.01064093 | 7.51     |
| gi 68534989 ref NM_001025224.1    | turquoise     | 241.70027 | 54.344529 | -0.26242  | 0.66975174 | 172.544  |
| gi 70778850 ref NM_214094.2       | navy          | 54.349047 | 25.503033 | 0.8345888 | 0.07872286 | 5.592    |
| gi 71834281 ref NM_214197.2       | darkred       | 219.89639 | 40.920369 | 0.9543191 | 0.01163959 | 121.884  |
| gi 72535201 ref NM_001031794.1    | turquoise     | 963.65016 | 206.27326 | 0.9304054 | 0.02180775 | 96.148   |
| gi 73853889 ref NM_001032359.1    | navy          | 294.24817 | 28.072728 | 0.8734441 | 0.05300741 | 555.606  |
| gi 73853893 ref NM_001032358.1    | green         | 860.8863  | 116.35098 | 0.99809   | 0.00010017 | 8.862    |
| gi 74024908 ref NM_001032379.1    | turquoise     | 884.6622  | 204.63641 | 0.9343252 | 0.02000352 | 34.302   |
| gi 74136750 ref NM_001033009.1    | pink          | 710.73398 | 130.90131 | 0.9726394 | 0.00541043 | 10.314   |
| gi 74136760 ref NM_001033014.1    | turquoise     | 454.39615 | 121.42464 | 0.8297282 | 0.08215472 | 149.766  |
| gi 77628017 ref NM_001008689.2    | tan           | 155.01799 | 44.446407 | 0.9703792 | 0.00609242 | 81.746   |
| gi 78364925 gb DQ225117.1         | lightgreen    | 322.38501 | 36.301111 | 0.9389946 | 0.01792141 | 5.278    |
| gi 80971509 ref NM_001037151.1    | yellow        | 239.57174 | 112.63181 | 0.9579238 | 0.01029507 | 12.162   |
| gi 80971515 ref NM_001037152.1    | lightcyan     | 247.9365  | 40.271097 | 0.9080163 | 0.0330229  | 3.79     |
| gi 82617535 ref NM_001037322.1    | pink          | 934.87902 | 143.14888 | 0.9904012 | 0.00112729 | 3.692    |
| gi 83921642 ref NM_001038007.1    | green         | 990.30849 | 98.794167 | 0.9583373 | 0.01014429 | 63.646   |
| gi 84579912 ref NM_001038644.1    | black         | 665.55666 | 97.007027 | 0.9753385 | 0.00463181 | 17.21    |
| gi 84619523 ref NM_001038694.1    | darkmagenta   | 248.25485 | 4.7570421 | -0.844937 | 0.07156953 | 9.77     |
| gi 84874691 ref NM_001038632.1    | darkmagenta   | 78.05922  | 8.4214047 | 0.9685468 | 0.00666457 | 17.908   |
| gi 89574200 gb DQ402993.1         | lightcyan     | 429.05922 | 45.578124 | 0.9319322 | 0.02109901 | 3.21     |
| gi 89886172 ref NM_001039748.1    | turquoise     | 992.69528 | 206.8584  | 0.9296183 | 0.02217608 | 40.826   |
| gi 89886176 ref NM_001039750.1    | red           | 936.02577 | 123.19101 | 0.9916628 | 0.00091268 | 4.418    |
| gi 90017493 ref NM_214184.2       | brown         | 824.88394 | 116.56028 | 0.9596336 | 0.00967647 | 245.14   |
| gi 92020093 dbj AB237777.1        | turquoise     | 124.08682 | 45.422563 | 0.5223089 | 0.36658972 | 14.468   |
| gnl UG Ssc#S14768592              | salmon        | 216.40111 | 72.788768 | 0.9849959 | 0.00220126 | 5.7      |
| gnl UG Ssc#S14889148              | red           | 785.58494 | 119.60485 | 0.9861691 | 0.00194853 | 2.59     |
| gnl UG Ssc#S14891120              | turquoise     | 279.33282 | 58.82413  | 0.6030049 | 0.28170053 | 30.63    |
| gnl UG Ssc#S14891216              | yellow        | 292.4885  | 122.00244 | 0.9744985 | 0.00486985 | 2.872    |
| gnl UG Ssc#S14894901              | orange        | 191.98059 | 35.123806 | 0.9674735 | 0.00700745 | 13.114   |
| gnl UG Ssc#S14900031              | white         | 264.38956 | 16.795092 | -0.551096 | 0.33566514 | 55.172   |
| gnl UG Ssc#S14900094              | darkturquoise | 237.85665 | 44.723346 | 0.98898   | 0.0013864  | 5.288    |
| gnl UG Ssc#S15981045              | darkturquoise | 227.22413 | 45.271762 | 0.9891201 | 0.00136007 | 3.858    |
| gnl UG Ssc#S16511729              | purple        | 207.05113 | 58.434912 | 0.9308284 | 0.02161061 | 138.328  |
| gnl UG Ssc#S16513699              | pink          | 894.62975 | 149.62591 | 0.9996875 | 6.63E-06   | 1.476    |

|                      |              |           |           |           |            |         |
|----------------------|--------------|-----------|-----------|-----------|------------|---------|
| gnl UG Ssc#S16513921 | lightgreen   | 228.38194 | 22.170291 | 0.7326965 | 0.15907853 | 5.418   |
| gnl UG Ssc#S16514435 | darkgrey     | 851.25917 | 49.48276  | 0.9794193 | 0.00353329 | 4.53    |
| gnl UG Ssc#S16514740 | turquoise    | 433.64206 | 146.88185 | 0.8843079 | 0.04640938 | 6.758   |
| gnl UG Ssc#S16514775 | lightgreen   | 477.20929 | 38.860131 | 0.9327694 | 0.02071359 | 4.206   |
| gnl UG Ssc#S16514958 | pink         | 872.08932 | 148.90816 | 0.9987571 | 5.26E-05   | 77.926  |
| gnl UG Ssc#S16515033 | navy         | 163.06111 | 39.477583 | 0.9542109 | 0.01168077 | 12.246  |
| gnl UG Ssc#S16515706 | grey60       | 314.90295 | 68.420208 | 0.9967709 | 0.00022016 | 34.856  |
| gnl UG Ssc#S16515765 | yellow       | 250.06895 | 116.19273 | 0.9645336 | 0.00797508 | 21.078  |
| gnl UG Ssc#S16515841 | pink         | 894.97665 | 145.04011 | 0.9933798 | 0.00064597 | 1.598   |
| gnl UG Ssc#S16516581 | pink         | 942.00351 | 144.7948  | 0.9928165 | 0.00073008 | 7.256   |
| gnl UG Ssc#S16517530 | darkgrey     | 1000.0671 | 50.346312 | 0.981127  | 0.00310358 | 5.122   |
| gnl UG Ssc#S16517601 | pink         | 946.52929 | 145.63748 | 0.9938987 | 0.00057157 | 4.67    |
| gnl UG Ssc#S16517614 | darkgrey     | 992.54319 | 51.851955 | 0.9876534 | 0.00164381 | 9.042   |
| gnl UG Ssc#S16517726 | royalblue    | 393.90701 | 50.265673 | 0.9437654 | 0.01587235 | 228.74  |
| gnl UG Ssc#S16518321 | turquoise    | 393.4555  | 61.724555 | 0.0467265 | 0.94052767 | 8.052   |
| gnl UG Ssc#S16761746 | darkmagenta  | 84.675523 | 10.015471 | 0.9503156 | 0.01319473 | 62.274  |
| gnl UG Ssc#S16761785 | navy         | 87.102131 | 32.928668 | 0.8951851 | 0.04008848 | 24.838  |
| gnl UG Ssc#S16761818 | orange       | 276.47693 | 37.642946 | 0.9995206 | 1.26E-05   | 5.536   |
| gnl UG Ssc#S16763004 | lightyellow  | 340.04317 | 48.53029  | 0.9402568 | 0.01737145 | 5.044   |
| gnl UG Ssc#S16763253 | pink         | 931.16854 | 148.2198  | 0.9976311 | 0.00013836 | 5.694   |
| gnl UG Ssc#S16763399 | navy         | 894.62975 | 19.364124 | 0.0047011 | 0.99401438 | 1.668   |
| gnl UG Ssc#S16763478 | lightgreen   | 356.54688 | 37.285999 | 0.9216761 | 0.02600194 | 11.652  |
| gnl UG Ssc#S16763868 | greenyellow  | 63.192719 | 13.581205 | 0.498656  | 0.39248485 | 24.158  |
| gnl UG Ssc#S16764486 | pink         | 913.35599 | 149.63395 | 0.9996656 | 7.34E-06   | 5.216   |
| gnl UG Ssc#S16764576 | midnightblue | 851.18008 | 74.311297 | 0.9871779 | 0.00173955 | 5.306   |
| gnl UG Ssc#S16767076 | magenta      | 339.27799 | 84.399372 | 0.9925487 | 0.00077126 | 43.86   |
| gnl UG Ssc#S16767694 | red          | 908.49305 | 127.64415 | 0.999264  | 2.40E-05   | 5.658   |
| gnl UG Ssc#S16768026 | yellow       | 306.84562 | 127.85507 | 0.9880101 | 0.00157317 | 28.05   |
| gnl UG Ssc#S16768494 | pink         | 949.21872 | 147.95618 | 0.9971915 | 0.00017859 | 3.622   |
| gnl UG Ssc#S16769025 | turquoise    | 382.9655  | 123.32494 | 0.8237652 | 0.08642595 | 17.066  |
| gnl UG Ssc#S16769591 | red          | 953.52131 | 122.63981 | 0.9905252 | 0.00110553 | 4.854   |
| gnl UG Ssc#S16769624 | blue         | 975.3702  | 116.24941 | 0.9329416 | 0.02063461 | 14.214  |
| gnl UG Ssc#S16770187 | yellow       | 278.44124 | 125.27983 | 0.9822155 | 0.00283944 | 15.526  |
| gnl UG Ssc#S16771004 | pink         | 918.87517 | 149.58726 | 0.9995805 | 1.03E-05   | 3.456   |
| gnl UG Ssc#S17499579 | turquoise    | 767.73066 | 203.10637 | 0.9450912 | 0.01531747 | 13.918  |
| gnl UG Ssc#S17499681 | darkorange   | 171.08489 | 21.132704 | 0.8512588 | 0.06730474 | 323.88  |
| gnl UG Ssc#S17500017 | skyblue      | 651.11938 | 38.392302 | 0.9639446 | 0.00817384 | 8.016   |
| gnl UG Ssc#S17501425 | orange       | 248.11881 | 37.253713 | 0.9957905 | 0.00032764 | 7.624   |
| gnl UG Ssc#S17503882 | turquoise    | 974.33729 | 200.43367 | 0.915764  | 0.02897449 | 7.504   |
| gnl UG Ssc#S17504229 | purple       | 148.07333 | 39.869576 | 0.8400548 | 0.07491808 | 25.174  |
| gnl UG Ssc#S17505316 | pink         | 694.80583 | 122.04845 | 0.9587225 | 0.01000453 | 3.196   |
| gnl UG Ssc#S17505417 | salmon       | 239.36964 | 71.813953 | 0.9814692 | 0.00301969 | 21.244  |
| gnl UG Ssc#S17505677 | pink         | 804.472   | 141.39393 | 0.9882174 | 0.00153258 | 2.892   |
| gnl UG Ssc#S17505852 | pink         | 952.90607 | 145.89389 | 0.9942396 | 0.00052437 | 3.4     |
| gnl UG Ssc#S17508314 | pink         | 860.77958 | 147.68324 | 0.9970775 | 0.00018957 | 1.592   |
| gnl UG Ssc#S17509886 | darkgreen    | 141.86205 | 29.666695 | 0.8803576 | 0.04877641 | 628.702 |
| gnl UG Ssc#S17510046 | green        | 924.84566 | 109.63231 | 0.9821177 | 0.00286286 | 6.056   |
| gnl UG Ssc#S17510077 | violet       | 117.21627 | 3.6151283 | -0.377178 | 0.53140486 | 68.53   |

|                      |               |           |           |           |            |         |
|----------------------|---------------|-----------|-----------|-----------|------------|---------|
| gnl UG Ssc#S17510233 | navy          | 106.28728 | 32.043607 | 0.8940798 | 0.04071726 | 64.248  |
| gnl UG Ssc#S17510311 | brown         | 643.44408 | 123.59987 | 0.9737203 | 0.00509383 | 6.412   |
| gnl UG Ssc#S17510336 | turquoise     | 837.48465 | 186.30334 | 0.9048093 | 0.03474763 | 11.64   |
| gnl UG Ssc#S17510396 | blue          | 352.89215 | 84.191328 | 0.8653877 | 0.05807534 | 66.802  |
| gnl UG Ssc#S17510398 | green         | 932.74203 | 109.52602 | 0.9817993 | 0.00293953 | 135.022 |
| gnl UG Ssc#S17510452 | lightgreen    | 194.03721 | 21.881026 | 0.7031342 | 0.1852767  | 15.46   |
| gnl UG Ssc#S17510525 | skyblue       | 491.96362 | 44.562338 | 0.9998439 | 2.34E-06   | 44.822  |
| gnl UG Ssc#S17510796 | salmon        | 223.62514 | 72.436418 | 0.9835648 | 0.00252304 | 11.56   |
| gnl UG Ssc#S17510917 | turquoise     | 827.25219 | 205.79066 | 0.9399386 | 0.01750956 | 2.068   |
| gnl UG Ssc#S17510986 | blue          | 897.36593 | 151.76845 | 0.9975891 | 0.00014205 | 150.16  |
| gnl UG Ssc#S17511033 | white         | 247.52563 | 14.979054 | -0.444701 | 0.45304842 | 27.494  |
| gnl UG Ssc#S17511146 | black         | 943.41123 | 96.506952 | 0.9727163 | 0.00538769 | 7.24    |
| gnl UG Ssc#S17511222 | darkred       | 131.28429 | 20.412418 | 0.7784746 | 0.12091604 | 10.318  |
| gnl UG Ssc#S17511240 | violet        | 204.21758 | 7.8763108 | 0.1664142 | 0.78909692 | 166.85  |
| gnl UG Ssc#S17511285 | white         | 234.34557 | 16.799497 | -0.653234 | 0.23195108 | 537.194 |
| gnl UG Ssc#S17511386 | darkgrey      | 825.18073 | 49.994574 | 0.9813186 | 0.00305651 | 567.994 |
| gnl UG Ssc#S17511419 | turquoise     | 222.52803 | 75.132932 | 0.6241423 | 0.26045009 | 28.844  |
| gnl UG Ssc#S17511439 | darkgreen     | 240.33719 | 39.359297 | 0.9693617 | 0.00640804 | 32.688  |
| gnl UG Ssc#S17511723 | lightgreen    | 346.64308 | 34.381444 | 0.9044227 | 0.03495746 | 13.298  |
| gnl UG Ssc#S17511887 | salmon        | 195.70657 | 72.724291 | 0.9859203 | 0.00200127 | 5.518   |
| gnl UG Ssc#S17512005 | blue          | 903.32273 | 142.68249 | 0.9831182 | 0.0026264  | 26.74   |
| gnl UG Ssc#S17512032 | pink          | 851.25251 | 146.16805 | 0.9950022 | 0.00042382 | 3.474   |
| gnl UG Ssc#S17512154 | yellow        | 256.75701 | 119.96542 | 0.9735468 | 0.00514423 | 349.08  |
| gnl UG Ssc#S17512186 | greenyellow   | 239.04369 | 33.98481  | 0.9541504 | 0.0117038  | 29.262  |
| gnl UG Ssc#S17512237 | tan           | 150.34164 | 35.362081 | 0.9184241 | 0.02762421 | 4.28    |
| gnl UG Ssc#S17512269 | grey          | 562.34631 | 14.588076 | 0.9790584 | 0.00362644 | 28.13   |
| gnl UG Ssc#S17512288 | yellow        | 262.00834 | 79.055999 | 0.8812521 | 0.04823714 | 5.872   |
| gnl UG Ssc#S17513253 | pink          | 618.36318 | 118.28061 | 0.9518896 | 0.01257573 | 14.35   |
| gnl UG Ssc#S17513449 | darkorange    | 164.97643 | 32.178893 | 0.9786163 | 0.00374162 | 25.22   |
| gnl UG Ssc#S17513694 | paleturquoise | 150.2437  | 15.826283 | 0.8390516 | 0.07561201 | 7.906   |
| gnl UG Ssc#S17513715 | turquoise     | 132.41377 | 35.639205 | 0.4744735 | 0.4193833  | 22.848  |
| gnl UG Ssc#S17513789 | turquoise     | 903.27116 | 220.91397 | 0.9710784 | 0.00587861 | 6.13    |
| gnl UG Ssc#S17513958 | brown         | 689.98024 | 135.10572 | 0.9983801 | 7.82E-05   | 10.416  |
| gnl UG Ssc#S17513979 | magenta       | 400.58016 | 76.773326 | 0.9672627 | 0.00707544 | 109.992 |
| gnl UG Ssc#S17514069 | turquoise     | 831.84255 | 207.17384 | 0.9561614 | 0.01094566 | 8.132   |
| gnl UG Ssc#S17514190 | blue          | 423.88343 | 97.599921 | 0.8991596 | 0.0378534  | 1.036   |
| gnl UG Ssc#S17514318 | lightyellow   | 514.01149 | 54.464277 | 0.9649548 | 0.00783395 | 11.37   |
| gnl UG Ssc#S17514409 | magenta       | 243.64261 | 82.927256 | 0.9904278 | 0.0011226  | 126.616 |
| gnl UG Ssc#S17514565 | lightcyan     | 604.3646  | 52.610328 | 0.9478482 | 0.01418439 | 10.894  |
| gnl UG Ssc#S17514632 | magenta       | 409.85032 | 77.872581 | 0.9697822 | 0.00627696 | 399.728 |
| gnl UG Ssc#S17514667 | magenta       | 434.31013 | 72.14281  | 0.9503223 | 0.01319209 | 3.254   |
| gnl UG Ssc#S17514838 | darkorange    | 128.19322 | 29.689685 | 0.9506208 | 0.01307394 | 14.204  |
| gnl UG Ssc#S17515039 | yellow        | 299.26062 | 127.01277 | 0.9844446 | 0.00232349 | 8.298   |
| gnl UG Ssc#S17515108 | navy          | 278.9891  | 27.923176 | 0.8672704 | 0.05687803 | 10.774  |
| gnl UG Ssc#S17515316 | black         | 814.88095 | 108.48438 | 0.9989504 | 4.08E-05   | 29.644  |
| gnl UG Ssc#S17515611 | brown         | 753.7086  | 124.8141  | 0.9761094 | 0.00441685 | 27.462  |
| gnl UG Ssc#S17515701 | turquoise     | 968.2933  | 212.13383 | 0.9420248 | 0.01661055 | 22.88   |
| gnl UG Ssc#S17515754 | red           | 913.6448  | 124.91804 | 0.9947153 | 0.00046081 | 7.496   |

|                      |               |           |           |           |            |         |
|----------------------|---------------|-----------|-----------|-----------|------------|---------|
| gnl UG Ssc#S17515773 | green         | 972.93841 | 104.27827 | 0.9702377 | 0.00613601 | 25.942  |
| gnl UG Ssc#S17515809 | darkmagenta   | 270.76359 | 5.1307161 | -0.795233 | 0.10774913 | 19.2    |
| gnl UG Ssc#S17515842 | green         | 763.1865  | 112.37684 | 0.9922882 | 0.00081201 | 10.278  |
| gnl UG Ssc#S17516048 | grey60        | 255.26032 | 53.494203 | 0.9446099 | 0.01551818 | 54.216  |
| gnl UG Ssc#S17516064 | magenta       | 316.37154 | 85.303607 | 0.9958908 | 0.00031601 | 4.746   |
| gnl UG Ssc#S17516079 | tan           | 136.45774 | 43.148507 | 0.9731838 | 0.00525019 | 16.908  |
| gnl UG Ssc#S17516095 | tan           | 129.69556 | 37.725223 | 0.9279069 | 0.02298378 | 17.85   |
| gnl UG Ssc#S17516148 | pink          | 984.43784 | 141.92093 | 0.988367  | 0.00150352 | 23.446  |
| gnl UG Ssc#S17516311 | yellow        | 238.41156 | 109.74134 | 0.9508722 | 0.01297473 | 416.9   |
| gnl UG Ssc#S17516549 | greenyellow   | 159.28707 | 24.425968 | 0.8458557 | 0.07094463 | 28.444  |
| gnl UG Ssc#S17516828 | grey60        | 307.56397 | 68.163945 | 0.9963503 | 0.00026454 | 124.356 |
| gnl UG Ssc#S17516920 | lightcyan     | 394.39923 | 59.019481 | 0.9947366 | 0.00045802 | 20.44   |
| gnl UG Ssc#S17516962 | navy          | 70.9106   | 35.471009 | 0.9447424 | 0.01546283 | 3.986   |
| gnl UG Ssc#S17517004 | turquoise     | 837.78046 | 208.4526  | 0.9612522 | 0.00910258 | 15.058  |
| gnl UG Ssc#S17517072 | yellow        | 300.42333 | 130.07152 | 0.9906018 | 0.00109217 | 4.114   |
| gnl UG Ssc#S17517096 | navy          | 69.903871 | 8.7068118 | -0.729809 | 0.16158626 | 26.954  |
| gnl UG Ssc#S17517121 | greenyellow   | 178.69443 | 35.549762 | 0.9648795 | 0.00785911 | 3.07    |
| gnl UG Ssc#S17517147 | lightcyan     | 609.28237 | 52.799293 | 0.9483332 | 0.01398801 | 2.102   |
| gnl UG Ssc#S17517405 | brown         | 602.23056 | 125.61291 | 0.9848229 | 0.00223936 | 4.738   |
| gnl UG Ssc#S17517774 | salmon        | 166.84305 | 65.00622  | 0.9621601 | 0.00878575 | 8.344   |
| gnl UG Ssc#S17517964 | turquoise     | 1018.4303 | 211.6276  | 0.9353788 | 0.01952728 | 21.412  |
| gnl UG Ssc#S17518104 | lightyellow   | 287.48379 | 51.324374 | 0.9479426 | 0.01414612 | 2.9     |
| gnl UG Ssc#S17518111 | red           | 952.16383 | 123.12044 | 0.9913589 | 0.00096299 | 3.364   |
| gnl UG Ssc#S17518115 | green         | 701.32953 | 91.8697   | 0.9482576 | 0.01401858 | 11.064  |
| gnl UG Ssc#S17518180 | lightyellow   | 393.4967  | 62.558295 | 0.9933669 | 0.00064786 | 12.206  |
| gnl UG Ssc#S17518305 | brown         | 623.1071  | 125.516   | 0.9856305 | 0.00206328 | 10.732  |
| gnl UG Ssc#S17518307 | yellow        | 269.09853 | 117.99104 | 0.9685933 | 0.00664984 | 18.75   |
| gnl UG Ssc#S17518363 | greenyellow   | 159.26933 | 34.267184 | 0.9421189 | 0.01657038 | 29.408  |
| gnl UG Ssc#S17518385 | yellow        | 315.5642  | 122.47497 | 0.9776034 | 0.00400997 | 163.926 |
| gnl UG Ssc#S17518565 | yellow        | 299.96269 | 134.89187 | 0.9994749 | 1.44E-05   | 36.39   |
| gnl UG Ssc#S17518664 | turquoise     | 387.27241 | 136.4377  | 0.8663887 | 0.05743778 | 16.424  |
| gnl UG Ssc#S17518706 | magenta       | 183.44408 | 68.527466 | 0.9451848 | 0.01527855 | 15.52   |
| gnl UG Ssc#S17518750 | brown         | 559.18813 | 119.92456 | 0.9760648 | 0.00442918 | 10.732  |
| gnl UG Ssc#S17518758 | darkgreen     | 105.09753 | 18.763428 | 0.7821195 | 0.11801368 | 22.104  |
| gnl UG Ssc#S17518763 | darkturquoise | 185.31379 | 42.744314 | 0.9787791 | 0.00369908 | 17.348  |
| gnl UG Ssc#S17518772 | darkmagenta   | 78.239046 | 9.3598668 | 0.9741839 | 0.00496    | 20.602  |
| gnl UG Ssc#S17518773 | yellow        | 301.66711 | 131.51531 | 0.9942907 | 0.00051741 | 40.37   |
| gnl UG Ssc#S17518795 | brown         | 699.47681 | 119.42663 | 0.9617498 | 0.00892847 | 18.71   |
| gnl UG Ssc#S17518997 | lightcyan     | 337.09796 | 55.658603 | 0.9831013 | 0.00263033 | 14.306  |
| gnl UG Ssc#S17519017 | midnightblue  | 901.71713 | 73.419853 | 0.9843964 | 0.00233429 | 9.424   |
| gnl UG Ssc#S17524473 | brown         | 765.09338 | 134.79592 | 0.9940097 | 0.00055606 | 27.03   |
| gnl UG Ssc#S17524578 | lightgreen    | 438.9502  | 36.530454 | 0.9524069 | 0.01237442 | 10.518  |
| gnl UG Ssc#S17524627 | turquoise     | 430.27043 | 122.39446 | 0.7665706 | 0.13054001 | 26.698  |
| gnl UG Ssc#S17524633 | lightgreen    | 259.58591 | 30.80129  | 0.8834241 | 0.0469357  | 112.362 |
| gnl UG Ssc#S17524752 | turquoise     | 963.6287  | 206.17013 | 0.9286625 | 0.022626   | 22.624  |
| gnl UG Ssc#S17524900 | brown         | 729.12689 | 135.67757 | 0.9981947 | 9.21E-05   | 10.296  |
| gnl UG Ssc#S17524908 | pink          | 864.40729 | 144.67838 | 0.9929614 | 0.00070812 | 1.65    |
| gnl UG Ssc#S17524953 | brown         | 630.32044 | 124.40071 | 0.9842037 | 0.00237759 | 17.242  |

|                      |               |           |           |           |            |         |
|----------------------|---------------|-----------|-----------|-----------|------------|---------|
| gnl UG Ssc#S17524981 | lightyellow   | 551.75474 | 62.490462 | 0.9922672 | 0.00081534 | 14.526  |
| gnl UG Ssc#S17524990 | black         | 645.61665 | 98.395739 | 0.978056  | 0.00388932 | 11.888  |
| gnl UG Ssc#S17525104 | darkturquoise | 176.15284 | 44.564043 | 0.9866508 | 0.00184777 | 23.934  |
| gnl UG Ssc#S17525203 | magenta       | 128.23091 | 44.43934  | 0.8456977 | 0.07105196 | 3.938   |
| gnl UG Ssc#S17525225 | red           | 969.36198 | 120.14576 | 0.9862318 | 0.00193531 | 4.434   |
| gnl UG Ssc#S17525376 | navy          | 288.66787 | 24.740921 | 0.8330758 | 0.07978628 | 15.928  |
| gnl UG Ssc#S17525378 | black         | 849.52004 | 108.29892 | 0.9984326 | 7.45E-05   | 10.93   |
| gnl UG Ssc#S17525409 | turquoise     | 212.50142 | 71.117316 | 0.5477448 | 0.33923041 | 8.764   |
| gnl UG Ssc#S17525410 | grey          | 535.09449 | 14.889707 | 0.9837403 | 0.00248279 | 7.036   |
| gnl UG Ssc#S17525682 | red           | 921.20767 | 125.90422 | 0.9963512 | 0.00026444 | 72.126  |
| gnl UG Ssc#S17525753 | grey          | 603.33466 | 14.193849 | 0.9738832 | 0.00504669 | 5.38    |
| gnl UG Ssc#S17525826 | brown         | 91.72254  | 8.2190244 | 0.1909114 | 0.75840875 | 3.778   |
| gnl UG Ssc#S17525865 | black         | 915.01122 | 102.27127 | 0.9861922 | 0.00194365 | 13.94   |
| gnl UG Ssc#S17526139 | darkgreen     | 162.52337 | 15.519248 | 0.6644781 | 0.22118174 | 18.044  |
| gnl UG Ssc#S17526150 | darkgreen     | 225.9427  | 40.492436 | 0.974733  | 0.004803   | 18.524  |
| gnl UG Ssc#S17526193 | turquoise     | 971.97277 | 210.74563 | 0.9382369 | 0.01825421 | 51.252  |
| gnl UG Ssc#S17526232 | brown         | 601.9492  | 127.52189 | 0.9869242 | 0.00179136 | 9.218   |
| gnl UG Ssc#S17526234 | pink          | 894.62975 | 149.62591 | 0.9996875 | 6.63E-06   | 1.54    |
| gnl UG Ssc#S17526265 | black         | 848.79176 | 107.59268 | 0.9971708 | 0.00018057 | 3.01    |
| gnl UG Ssc#S17526422 | darkgreen     | 244.01673 | 43.457028 | 0.9974788 | 0.0001519  | 60.114  |
| gnl UG Ssc#S17526634 | grey60        | 272.20097 | 59.705216 | 0.9676592 | 0.0069477  | 30.83   |
| gnl UG Ssc#S17526834 | purple        | 199.80047 | 54.578317 | 0.9145634 | 0.02959066 | 31.928  |
| gnl UG Ssc#S17526835 | orange        | 213.02218 | 11.46129  | 0.708653  | 0.18029958 | 5.088   |
| gnl UG Ssc#S17526874 | blue          | 974.20899 | 136.40143 | 0.9710006 | 0.00590227 | 201.596 |
| gnl UG Ssc#S17526922 | black         | 908.67034 | 102.12119 | 0.9858024 | 0.00202642 | 10.146  |
| gnl UG Ssc#S17526927 | yellow        | 312.91879 | 127.91133 | 0.9876647 | 0.00164154 | 19.942  |
| gnl UG Ssc#S17526940 | blue          | 598.63254 | 111.87693 | 0.9286539 | 0.02263006 | 11.84   |
| gnl UG Ssc#S17526987 | tan           | 272.56661 | 26.674342 | 0.809198  | 0.0971339  | 13.45   |
| gnl UG Ssc#S17527330 | orange        | 205.73748 | 35.329202 | 0.9742316 | 0.00494628 | 42.81   |
| gnl UG Ssc#S17527420 | purple        | 268.23392 | 65.866361 | 0.9546356 | 0.0115194  | 75.458  |
| gnl UG Ssc#S17527438 | brown         | 769.70219 | 134.25551 | 0.9928331 | 0.00072755 | 14.792  |
| gnl UG Ssc#S17527454 | darkred       | 199.93685 | 40.324594 | 0.9420032 | 0.01661977 | 14.714  |
| gnl UG Ssc#S17527505 | blue          | 811.2297  | 147.24768 | 0.9915092 | 0.00093799 | 8.488   |
| gnl UG Ssc#S18260225 | turquoise     | 911.45954 | 208.5542  | 0.9401943 | 0.01739854 | 24.804  |
| gnl UG Ssc#S18261002 | turquoise     | 183.25753 | 74.439066 | 0.6553735 | 0.2298913  | 41.746  |
| gnl UG Ssc#S18262172 | brown         | 871.62396 | 117.15825 | 0.9579881 | 0.01027156 | 9.406   |
| gnl UG Ssc#S18262357 | magenta       | 479.37906 | 68.69662  | 0.9360449 | 0.01922807 | 5.214   |
| gnl UG Ssc#S18263440 | turquoise     | 844.5999  | 193.77597 | 0.9261179 | 0.02383801 | 11.838  |
| gnl UG Ssc#S18263529 | lightyellow   | 525.81652 | 60.20509  | 0.9838123 | 0.00246635 | 159.506 |
| gnl UG Ssc#S18263775 | brown         | 821.19693 | 127.12457 | 0.9764166 | 0.00433214 | 17.588  |
| gnl UG Ssc#S18263925 | paleturquoise | 190.89669 | 22.859323 | 0.9408052 | 0.01713425 | 6.302   |
| gnl UG Ssc#S18266615 | green         | 960.61185 | 109.7576  | 0.983154  | 0.00261806 | 8.034   |
| gnl UG Ssc#S18267174 | lightyellow   | 673.88141 | 51.875716 | 0.9481864 | 0.01404736 | 12.344  |
| gnl UG Ssc#S18267480 | blue          | 488.97652 | 95.58924  | 0.899954  | 0.03741161 | 2.732   |
| gnl UG Ssc#S18267647 | brown         | 753.6177  | 131.86451 | 0.9871792 | 0.00173927 | 9.088   |
| gnl UG Ssc#S18268726 | brown         | 616.59312 | 129.92872 | 0.9914428 | 0.00094902 | 2.338   |
| gnl UG Ssc#S18268814 | turquoise     | 438.01365 | 59.145613 | 0.0952858 | 0.87886219 | 10.476  |
| gnl UG Ssc#S18269890 | red           | 750.81837 | 115.24529 | 0.9785771 | 0.0037519  | 2.204   |



|                      |               |           |           |           |            |          |
|----------------------|---------------|-----------|-----------|-----------|------------|----------|
| gnl UG Ssc#S18270450 | violet        | 907.68042 | 47.007861 | 0.9907782 | 0.00106159 | 9.116    |
| gnl UG Ssc#S18270499 | navy          | 894.62975 | 19.364124 | 0.0047011 | 0.99401438 | 1.348    |
| gnl UG Ssc#S18272639 | purple        | 283.80615 | 78.037152 | 0.9941726 | 0.00053354 | 13.2     |
| gnl UG Ssc#S18272798 | pink          | 1003.0901 | 132.19343 | 0.9735664 | 0.00513854 | 4.676    |
| gnl UG Ssc#S18272948 | turquoise     | 333.0758  | 124.75013 | 0.7968934 | 0.10646945 | 9.41     |
| gnl UG Ssc#S18274718 | turquoise     | 357.54514 | 110.48152 | 0.8226096 | 0.08726132 | 7.324    |
| gnl UG Ssc#S18276256 | pink          | 842.37751 | 140.95241 | 0.9877068 | 0.00163316 | 15.742   |
| gnl UG Ssc#S18277539 | orange        | 172.45247 | 16.273991 | 0.7698809 | 0.12784179 | 56.136   |
| gnl UG Ssc#S18277825 | violet        | 855.60095 | 46.315063 | 0.9968602 | 0.0002111  | 2.472    |
| gnl UG Ssc#S18281860 | lightcyan     | 599.49472 | 54.211337 | 0.9566395 | 0.01076786 | 11.994   |
| gnl UG Ssc#S18282381 | navy          | 153.77298 | 34.948221 | 0.910334  | 0.03179411 | 67.876   |
| gnl UG Ssc#S18283093 | darkturquoise | 158.7219  | 38.584021 | 0.9511339 | 0.01287169 | 20.704   |
| gnl UG Ssc#S18283235 | turquoise     | 1014.03   | 207.29657 | 0.9268655 | 0.02347982 | 8.802    |
| gnl UG Ssc#S18284222 | black         | 795.55243 | 108.04192 | 0.9981713 | 9.38E-05   | 2.46     |
| gnl UG Ssc#S18284670 | pink          | 923.87745 | 149.0656  | 0.9988184 | 4.88E-05   | 14.528   |
| gnl UG Ssc#S18289792 | lightcyan     | 561.15593 | 56.397027 | 0.9699634 | 0.00622075 | 7.256    |
| gnl UG Ssc#S18290449 | turquoise     | 864.69617 | 211.0511  | 0.9616961 | 0.00894721 | 462.178  |
| gnl UG Ssc#S18291801 | lightgreen    | 413.82847 | 37.493574 | 0.9023628 | 0.03608211 | 8.244    |
| gnl UG Ssc#S18292679 | darkgrey      | 823.2405  | 50.998339 | 0.9855554 | 0.00207944 | 6.348    |
| gnl UG Ssc#S18292759 | darkgrey      | 945.6037  | 53.941585 | 0.9968428 | 0.00021286 | 11.44    |
| gnl UG Ssc#S18295197 | violet        | 790.10937 | 44.008215 | 0.9912673 | 0.00097834 | 3.034    |
| gnl UG Ssc#S18301441 | darkgrey      | 614.73716 | 39.184639 | 0.9302786 | 0.02186696 | 8.536    |
| gnl UG Ssc#S18301820 | tan           | 237.70699 | 39.010513 | 0.9176637 | 0.02800809 | 5.886    |
| gnl UG Ssc#S18304172 | turquoise     | 240.03843 | 90.243158 | 0.6994401 | 0.18862971 | 4.412    |
| gnl UG Ssc#S18333765 | turquoise     | 540.99333 | 167.797   | 0.8989252 | 0.03798411 | 2.426    |
| gnl UG Ssc#S18336060 | navy          | 974.40316 | 18.567806 | 0.1324765 | 0.83182041 | 2.7      |
| gnl UG Ssc#S18336254 | violet        | 907.56758 | 46.927368 | 0.9913781 | 0.00095979 | 3.396    |
| gnl UG Ssc#S18336569 | navy          | 81.223613 | 6.8985806 | -0.976383 | 0.00434142 | 17.206   |
| gnl UG Ssc#S18354030 | magenta       | 207.35533 | 76.668817 | 0.9714203 | 0.00577498 | 2.48     |
| gnl UG Ssc#S18354391 | turquoise     | 201.7854  | 47.960308 | -0.292289 | 0.63321519 | 83.09    |
| gnl UG Ssc#S18354494 | navy          | 133.05634 | 36.325289 | 0.955789  | 0.0110848  | 48.238   |
| gnl UG Ssc#S18354763 | turquoise     | 946.50786 | 218.67289 | 0.9543308 | 0.01163512 | 9.514    |
| gnl UG Ssc#S18354874 | darkred       | 201.21475 | 43.166029 | 0.977828  | 0.00394995 | 8.736    |
| gnl UG Ssc#S18355787 | greenyellow   | 44.933767 | 7.2127302 | 0.36433   | 0.54659764 | 27.126   |
| gnl UG Ssc#S18355850 | tan           | 104.56254 | 25.121006 | 0.8002147 | 0.10392407 | 6.294    |
| gnl UG Ssc#S18355951 | green         | 845.45924 | 112.88182 | 0.9927799 | 0.00073567 | 15.354   |
| gnl UG Ssc#S18355973 | white         | 235.22528 | 16.613629 | -0.622693 | 0.26189266 | 39.922   |
| gnl UG Ssc#S18355999 | yellow        | 243.80045 | 108.51805 | 0.9492408 | 0.01362297 | 8.734    |
| gnl UG Ssc#S18356219 | lightcyan     | 200.12975 | 34.780674 | 0.8680452 | 0.05638758 | 18.608   |
| gnl UG Ssc#S18356676 | darkgreen     | 104.39495 | 22.766181 | 0.8010598 | 0.10327935 | 27.48    |
| gnl UG Ssc#S18357153 | darkturquoise | 239.62089 | 42.11151  | 0.9687228 | 0.00660887 | 2.1      |
| gnl UG Ssc#S18357219 | turquoise     | 371.9052  | 102.82345 | 0.7706554 | 0.1272129  | 43.116   |
| gnl UG Ssc#S18357288 | royalblue     | 710.60401 | 55.991851 | 0.9696043 | 0.00633232 | 8.048    |
| gnl UG Ssc#S18357398 | brown         | 753.22109 | 134.14107 | 0.9949434 | 0.00043132 | 14.216   |
| gnl UG Ssc#S18357511 | turquoise     | 338.3924  | 127.42138 | 0.8117529 | 0.09522837 | 24.218   |
| gnl UG Ssc#S18357580 | blue          | 972.5377  | 140.60494 | 0.9783869 | 0.00380186 | 16.7     |
| gnl UG Ssc#S18357620 | darkgreen     | 233.85152 | 43.015688 | 0.9927268 | 0.00074379 | 1430.466 |
| gnl UG Ssc#S18357751 | black         | 826.53627 | 106.50944 | 0.9951946 | 0.00039959 | 15.7     |

|                      |               |           |           |           |            |        |
|----------------------|---------------|-----------|-----------|-----------|------------|--------|
| gnl UG Ssc#S18357775 | orange        | 325.37526 | 35.595462 | 0.9872958 | 0.00171564 | 10.384 |
| gnl UG Ssc#S18358012 | darkgrey      | 941.03572 | 52.910669 | 0.992701  | 0.00074774 | 3.416  |
| gnl UG Ssc#S18358064 | yellow        | 181.05897 | 84.910132 | 0.8951572 | 0.04010431 | 44.296 |
| gnl UG Ssc#S18358279 | turquoise     | 436.70925 | 110.53558 | 0.7880174 | 0.1133623  | 43.6   |
| gnl UG Ssc#S18358567 | blue          | 897.48588 | 150.81705 | 0.9964061 | 0.0002585  | 2.03   |
| gnl UG Ssc#S18358587 | magenta       | 494.97441 | 64.348669 | 0.9201694 | 0.02674963 | 8.456  |
| gnl UG Ssc#S18358692 | darkturquoise | 159.17725 | 39.828687 | 0.9588797 | 0.00994767 | 5.21   |
| gnl UG Ssc#S18358900 | lightcyan     | 666.4084  | 48.911754 | 0.9248064 | 0.02447062 | 6.51   |
| gnl UG Ssc#S18358928 | navy          | 507.51552 | 11.882465 | -0.041488 | 0.94719077 | 20.32  |
| gnl UG Ssc#S18359073 | brown         | 806.18787 | 127.93387 | 0.9813366 | 0.00305212 | 10.764 |
| gnl UG Ssc#S18359101 | darkgrey      | 932.79021 | 53.725162 | 0.9960663 | 0.00029599 | 9.812  |
| gnl UG Ssc#S18359197 | yellow        | 231.13137 | 106.65682 | 0.9464514 | 0.01475491 | 7.118  |
| gnl UG Ssc#S18359209 | brown         | 572.80608 | 122.32115 | 0.9784423 | 0.0037873  | 6.556  |
| gnl UG Ssc#S18359264 | magenta       | 106.46834 | 42.52302  | 0.8340223 | 0.07912054 | 65.608 |
| gnl UG Ssc#S18359557 | violet        | 148.89601 | 8.0499274 | 0.520161  | 0.36892365 | 11.118 |
| gnl UG Ssc#S18359743 | turquoise     | 973.36303 | 222.20316 | 0.960339  | 0.00942493 | 11.128 |
| gnl UG Ssc#S18359767 | brown         | 728.74067 | 118.60619 | 0.9585744 | 0.0100582  | 8.904  |
| gnl UG Ssc#S18359803 | lightyellow   | 628.72735 | 56.131069 | 0.9666009 | 0.00729033 | 9.382  |
| gnl UG Ssc#S18360059 | midnightblue  | 988.47457 | 75.531328 | 0.9901684 | 0.00116851 | 9.066  |
| gnl UG Ssc#S18360480 | pink          | 895.07316 | 145.0791  | 0.9934342 | 0.00063803 | 2.396  |
| gnl UG Ssc#S18360885 | green         | 974.66766 | 107.03135 | 0.9770471 | 0.00415995 | 18.52  |
| gnl UG Ssc#S18361423 | turquoise     | 939.47053 | 222.42963 | 0.9714855 | 0.00575529 | 4.276  |
| gnl UG Ssc#S18361485 | grey60        | 307.27475 | 65.280138 | 0.9867163 | 0.00183418 | 6.886  |
| gnl UG Ssc#S18377137 | turquoise     | 246.729   | 95.659838 | 0.6627011 | 0.22287432 | 39.42  |
| gnl UG Ssc#S18377744 | pink          | 629.31228 | 118.44973 | 0.9520427 | 0.01251604 | 4.978  |
| gnl UG Ssc#S18377876 | turquoise     | 490.07141 | 160.16658 | 0.9106089 | 0.03164933 | 6.424  |
| gnl UG Ssc#S18378149 | blue          | 985.28606 | 132.35807 | 0.9637099 | 0.00825348 | 12.23  |
| gnl UG Ssc#S18378291 | blue          | 869.28344 | 147.74244 | 0.9914035 | 0.00095555 | 5.446  |
| gnl UG Ssc#S18378422 | magenta       | 422.618   | 74.633141 | 0.9594272 | 0.00975049 | 11.808 |
| gnl UG Ssc#S18378552 | yellow        | 300.29502 | 134.60691 | 0.9988473 | 4.70E-05   | 44.074 |
| gnl UG Ssc#S18378606 | turquoise     | 152.57019 | 48.528771 | 0.5289955 | 0.35934725 | 53.4   |
| gnl UG Ssc#S18378680 | darkred       | 67.917192 | 13.370553 | 0.6874553 | 0.19962408 | 42.68  |
| gnl UG Ssc#S18378791 | lightyellow   | 465.27737 | 61.945766 | 0.9907012 | 0.00107491 | 29.936 |
| gnl UG Ssc#S18378792 | red           | 519.14329 | 81.979651 | 0.9101755 | 0.03187764 | 10.664 |
| gnl UG Ssc#S18378854 | lightgreen    | 250.12565 | 30.665243 | 0.8550907 | 0.06475981 | 19.208 |
| gnl UG Ssc#S18378957 | lightyellow   | 568.19889 | 59.102097 | 0.9789302 | 0.00365972 | 4.966  |
| gnl UG Ssc#S18378982 | violet        | 913.07835 | 46.678649 | 0.9863894 | 0.00190221 | 3.862  |
| gnl UG Ssc#S18378997 | black         | 927.6836  | 99.99883  | 0.9805162 | 0.00325514 | 9.106  |
| gnl UG Ssc#S18379057 | magenta       | 171.57946 | 66.52572  | 0.937796  | 0.01844877 | 22.252 |
| gnl UG Ssc#S18379095 | red           | 950.81714 | 123.54037 | 0.9920861 | 0.00084412 | 1.746  |
| gnl UG Ssc#S18379108 | pink          | 926.41031 | 149.32193 | 0.999168  | 2.88E-05   | 35.868 |
| gnl UG Ssc#S18379116 | lightyellow   | 375.35936 | 60.012218 | 0.983719  | 0.00248766 | 19.9   |
| gnl UG Ssc#S18379252 | black         | 803.29181 | 108.67588 | 0.999357  | 1.96E-05   | 10.864 |
| gnl UG Ssc#S18379332 | turquoise     | 225.88539 | 67.276679 | 0.570968  | 0.31472125 | 25.488 |
| gnl UG Ssc#S18379352 | magenta       | 335.14695 | 77.230096 | 0.9727493 | 0.00537796 | 3.558  |
| gnl UG Ssc#S18379413 | darkgrey      | 645.86793 | 41.270081 | 0.9410982 | 0.01700796 | 14.896 |
| gnl UG Ssc#S18379594 | orange        | 282.41121 | 37.308561 | 0.9966778 | 0.00022975 | 3.622  |
| gnl UG Ssc#S18379751 | darkgreen     | 254.77043 | 42.178708 | 0.9889291 | 0.001396   | 35.814 |

|                      |              |           |           |           |            |        |
|----------------------|--------------|-----------|-----------|-----------|------------|--------|
| gnl UG Ssc#S18379761 | yellow       | 304.59825 | 130.64985 | 0.9910994 | 0.00100666 | 6.404  |
| gnl UG Ssc#S18380107 | brown        | 326.95832 | 62.568698 | 0.8275381 | 0.08371573 | 56.844 |
| gnl UG Ssc#S18380485 | pink         | 936.53503 | 145.34819 | 0.9935717 | 0.0006181  | 18.072 |
| gnl UG Ssc#S18380508 | pink         | 894.62975 | 149.62591 | 0.9996875 | 6.63E-06   | 0.128  |
| gnl UG Ssc#S18380537 | greenyellow  | 92.85046  | 13.156553 | 0.4795079 | 0.41374952 | 32.482 |
| gnl UG Ssc#S18380653 | darkgreen    | 210.42919 | 40.739821 | 0.9754114 | 0.00461132 | 35.38  |
| gnl UG Ssc#S18380710 | darkgrey     | 990.90988 | 50.755975 | 0.983353  | 0.00257189 | 16.706 |
| gnl UG Ssc#S18380942 | pink         | 897.85258 | 148.09906 | 0.9976258 | 0.00013882 | 17.29  |
| gnl UG Ssc#S18381258 | tan          | 133.84209 | 38.293093 | 0.9323137 | 0.02092308 | 15.392 |
| gnl UG Ssc#S18381264 | yellow       | 261.93765 | 124.64444 | 0.9820805 | 0.00287178 | 3.42   |
| gnl UG Ssc#S18381418 | navy         | 166.86774 | 40.75471  | 0.9711673 | 0.0058516  | 2.078  |
| gnl UG Ssc#S18381432 | turquoise    | 516.32956 | 164.15659 | 0.898965  | 0.03796189 | 28.418 |
| gnl UG Ssc#S18381627 | pink         | 894.62975 | 149.62591 | 0.9996875 | 6.63E-06   | 1.54   |
| gnl UG Ssc#S18382551 | navy         | 99.908692 | 7.5068219 | -0.831227 | 0.08109147 | 18.696 |
| gnl UG Ssc#S18382627 | pink         | 742.31316 | 135.66717 | 0.9797098 | 0.00345889 | 16.96  |
| gnl UG Ssc#S18382640 | navy         | 62.931566 | 4.6456546 | -0.821304 | 0.0882084  | 18.272 |
| gnl UG Ssc#S18383248 | turquoise    | 241.22569 | 52.801973 | 0.5164111 | 0.37300683 | 88.486 |
| gnl UG Ssc#S18383312 | yellow       | 293.20146 | 133.2237  | 0.9967039 | 0.00022705 | 19.078 |
| gnl UG Ssc#S18383420 | brown        | 573.92661 | 83.849797 | 0.8916719 | 0.04209781 | 29.312 |
| gnl UG Ssc#S18383442 | magenta      | 398.11957 | 78.096319 | 0.9713285 | 0.00580273 | 13.556 |
| gnl UG Ssc#S18383451 | royalblue    | 610.6862  | 63.950929 | 0.9983678 | 7.91E-05   | 11.612 |
| gnl UG Ssc#S18383491 | brown        | 714.30819 | 131.837   | 0.9930462 | 0.00069537 | 22.916 |
| gnl UG Ssc#S18383636 | red          | 938.19307 | 125.98013 | 0.9962989 | 0.00027014 | 2.452  |
| gnl UG Ssc#S18383637 | turquoise    | 423.13704 | 53.028318 | 0.1998348 | 0.74726616 | 15.534 |
| gnl UG Ssc#S18383725 | greenyellow  | 51.238247 | 12.369248 | 0.239197  | 0.69837459 | 56.816 |
| gnl UG Ssc#S18383839 | green        | 915.58534 | 114.66862 | 0.9937464 | 0.00059309 | 11.232 |
| gnl UG Ssc#S18383932 | darkgreen    | 182.3456  | 28.953112 | 0.8894818 | 0.04336613 | 72.27  |
| gnl UG Ssc#S18384163 | lightyellow  | 517.68344 | 63.172332 | 0.9955141 | 0.00036042 | 3.552  |
| gnl UG Ssc#S18384305 | black        | 852.38635 | 106.16603 | 0.9943902 | 0.00050395 | 8.462  |
| gnl UG Ssc#S18384469 | midnightblue | 817.12655 | 67.540129 | 0.9670581 | 0.00714165 | 8.328  |
| gnl UG Ssc#S18384885 | lightgreen   | 222.60766 | 23.183162 | 0.711881  | 0.17740636 | 12.712 |
| gnl UG Ssc#S18385915 | pink         | 894.62975 | 149.62591 | 0.9996875 | 6.63E-06   | 2.182  |
| gnl UG Ssc#S18386342 | white        | 810.24748 | 45.108066 | 0.9462312 | 0.0148455  | 1.824  |
| gnl UG Ssc#S18386541 | magenta      | 566.21498 | 50.931025 | 0.8599095 | 0.06160328 | 21.344 |
| gnl UG Ssc#S18386569 | green        | 821.73615 | 116.20181 | 0.9986684 | 5.83E-05   | 0.934  |
| gnl UG Ssc#S18387078 | darkorange   | 121.22062 | 25.383685 | 0.8956086 | 0.03984842 | 24.2   |
| gnl UG Ssc#S18387120 | yellow       | 208.75574 | 86.259766 | 0.9001293 | 0.03731435 | 12.398 |
| gnl UG Ssc#S18387223 | green        | 976.30679 | 106.54348 | 0.9760676 | 0.00442841 | 15.392 |
| gnl UG Ssc#S18387292 | brown        | 821.88267 | 124.69916 | 0.9708352 | 0.0059527  | 12.534 |
| gnl UG Ssc#S18387383 | black        | 829.63122 | 105.2165  | 0.9926681 | 0.0007528  | 12.454 |
| gnl UG Ssc#S18387501 | turquoise    | 115.70718 | 38.863929 | 0.5322476 | 0.35583747 | 21.05  |
| gnl UG Ssc#S18387558 | turquoise    | 689.36601 | 180.89166 | 0.8974153 | 0.03882931 | 16.364 |
| gnl UG Ssc#S18387565 | pink         | 894.62975 | 149.62591 | 0.9996875 | 6.63E-06   | 1.09   |
| gnl UG Ssc#S18387589 | turquoise    | 770.18589 | 182.45056 | 0.9146173 | 0.02956287 | 20.492 |
| gnl UG Ssc#S18387708 | yellow       | 283.44289 | 128.15746 | 0.9880101 | 0.00157316 | 98.382 |
| gnl UG Ssc#S18387783 | brown        | 692.7367  | 133.87206 | 0.9930163 | 0.00069985 | 26.86  |
| gnl UG Ssc#S18546005 | blue         | 728.68664 | 98.546098 | 0.9006721 | 0.03701368 | 35.446 |
| gnl UG Ssc#S18546038 | royalblue    | 860.4598  | 50.698129 | 0.9440342 | 0.01575934 | 9.102  |

|                      |               |           |           |           |            |         |
|----------------------|---------------|-----------|-----------|-----------|------------|---------|
| gnl UG Ssc#S18546074 | turquoise     | 932.52369 | 201.32217 | 0.9243897 | 0.02467273 | 11.62   |
| gnl UG Ssc#S18546081 | green         | 804.72801 | 112.88057 | 0.9920088 | 0.00085651 | 13.14   |
| gnl UG Ssc#S18546149 | grey60        | 269.16847 | 56.570052 | 0.9557162 | 0.01111207 | 78.546  |
| gnl UG Ssc#S18546387 | lightgreen    | 561.78267 | 33.595103 | 0.9428111 | 0.01627573 | 8.258   |
| gnl UG Ssc#S18546390 | magenta       | 128.10629 | 44.329655 | 0.8499468 | 0.06818315 | 101.666 |
| gnl UG Ssc#S18546426 | brown         | 580.38244 | 119.76145 | 0.976407  | 0.00433476 | 16.67   |
| gnl UG Ssc#S18546477 | orange        | 229.3237  | 14.164301 | 0.7145794 | 0.17499818 | 37.866  |
| gnl UG Ssc#S18546502 | green         | 815.17523 | 111.2253  | 0.989305  | 0.00132559 | 4.57    |
| gnl UG Ssc#S18546597 | red           | 900.72637 | 125.36582 | 0.9955339 | 0.00035804 | 2.238   |
| gnl UG Ssc#S18546698 | paleturquoise | 174.02344 | 22.63022  | 0.9467761 | 0.01462163 | 3.868   |
| gnl UG Ssc#S18546855 | grey60        | 253.41983 | 55.423058 | 0.9530671 | 0.01211904 | 23.912  |
| gnl UG Ssc#S18546948 | grey60        | 312.28029 | 68.867653 | 0.9982919 | 8.47E-05   | 14.914  |
| gnl UG Ssc#S18546984 | black         | 592.88902 | 88.619323 | 0.955902  | 0.01104254 | 1.26    |
| gnl UG Ssc#S18547064 | turquoise     | 563.80814 | 59.594233 | 0.3333602 | 0.58355054 | 3.64    |
| gnl UG Ssc#S18547312 | purple        | 276.49384 | 75.709252 | 0.9863213 | 0.0019165  | 21.44   |
| gnl UG Ssc#S18547360 | turquoise     | 971.86328 | 206.50099 | 0.9346199 | 0.01986995 | 12.056  |
| gnl UG Ssc#S18547454 | turquoise     | 779.37401 | 198.53929 | 0.9292267 | 0.02236006 | 4.58    |
| gnl UG Ssc#S18547573 | lightgreen    | 342.54419 | 36.501092 | 0.9428254 | 0.01626968 | 164.39  |
| gnl UG Ssc#S18547696 | yellow        | 313.54492 | 122.60112 | 0.9783581 | 0.00380946 | 10.952  |
| gnl UG Ssc#S18547766 | lightcyan     | 594.62757 | 51.087185 | 0.9414777 | 0.01684481 | 33.25   |
| gnl UG Ssc#S18547863 | greenyellow   | 228.35904 | 39.194958 | 0.997581  | 0.00014277 | 10.164  |
| gnl UG Ssc#S18548324 | darkturquoise | 216.77667 | 46.015941 | 0.994623  | 0.00047293 | 19.602  |
| gnl UG Ssc#S18548354 | magenta       | 413.29733 | 76.068498 | 0.9641788 | 0.00809461 | 6.548   |
| gnl UG Ssc#S18548531 | skyblue       | 551.99013 | 42.742191 | 0.9899004 | 0.00121655 | 12.306  |
| gnl UG Ssc#S18548560 | tan           | 176.92113 | 40.319216 | 0.9454638 | 0.0151627  | 8.408   |
| gnl UG Ssc#S18548647 | pink          | 895.07316 | 145.0791  | 0.9934342 | 0.00063803 | 2.396   |
| gnl UG Ssc#S18548755 | lightgreen    | 383.03482 | 38.748368 | 0.9449185 | 0.01538938 | 8.286   |
| gnl UG Ssc#S18548799 | turquoise     | 136.96006 | 45.270903 | 0.491163  | 0.4007749  | 9.17    |
| gnl UG Ssc#S18548805 | grey60        | 308.67107 | 68.256564 | 0.9965128 | 0.00024707 | 18.76   |
| gnl UG Ssc#S18548934 | turquoise     | 364.88403 | 92.883321 | 0.7285332 | 0.16269791 | 14.168  |
| gnl UG Ssc#S18548948 | black         | 601.90262 | 89.064925 | 0.9571401 | 0.01058275 | 23.852  |
| gnl UG Ssc#S18549036 | black         | 746.60657 | 103.99098 | 0.9902862 | 0.00114758 | 59.016  |
| gnl UG Ssc#S18549168 | lightgreen    | 516.5169  | 38.746966 | 0.9473242 | 0.01439756 | 21.086  |
| gnl UG Ssc#S18549184 | brown         | 491.13306 | 98.956997 | 0.9346963 | 0.01983535 | 8.658   |
| gnl UG Ssc#S18549395 | lightcyan     | 487.50345 | 56.543575 | 0.9761512 | 0.00440527 | 15.288  |
| gnl UG Ssc#S18549494 | black         | 871.24092 | 106.84381 | 0.995268  | 0.00039048 | 72.476  |
| gnl UG Ssc#S18549536 | turquoise     | 196.45487 | 69.467694 | 0.6096494 | 0.27497303 | 75.332  |
| gnl UG Ssc#S18549559 | paleturquoise | 161.08981 | 21.639457 | 0.9321271 | 0.02100908 | 4.442   |
| gnl UG Ssc#S18549601 | skyblue       | 616.6673  | 40.130908 | 0.9746268 | 0.00483324 | 6.006   |
| gnl UG Ssc#S18549808 | brown         | 639.50009 | 129.26561 | 0.9901561 | 0.00117069 | 7.538   |
| gnl UG Ssc#S18549874 | purple        | 254.31544 | 64.673931 | 0.9504923 | 0.01312474 | 9.776   |
| gnl UG Ssc#S18549905 | turquoise     | 825.07545 | 195.94947 | 0.933197  | 0.02051763 | 99.034  |
| gnl UG Ssc#S18550002 | turquoise     | 418.34635 | 60.887779 | 0.0908258 | 0.88451614 | 7.484   |
| gnl UG Ssc#S18550089 | purple        | 305.68219 | 74.857705 | 0.9825275 | 0.00276519 | 7.004   |
| gnl UG Ssc#S18550098 | turquoise     | 1013.7219 | 201.62882 | 0.9164113 | 0.02864397 | 5.804   |
| gnl UG Ssc#S18550130 | turquoise     | 186.1498  | 44.42408  | -0.300726 | 0.62295569 | 10.416  |
| gnl UG Ssc#S18550180 | turquoise     | 171.75441 | 64.136092 | 0.651906  | 0.23323262 | 33.696  |
| gnl UG Ssc#S18550687 | black         | 722.13071 | 104.91417 | 0.9920549 | 0.00084912 | 4.928   |

|                      |               |           |           |           |            |         |
|----------------------|---------------|-----------|-----------|-----------|------------|---------|
| gnl UG Ssc#S18550712 | blue          | 871.04339 | 150.76186 | 0.9969749 | 0.00019964 | 3.11    |
| gnl UG Ssc#S18550902 | lightyellow   | 337.43289 | 58.046998 | 0.9767178 | 0.00424958 | 87.922  |
| gnl UG Ssc#S18551086 | greenyellow   | 61.909127 | 14.618535 | 0.4253285 | 0.47525747 | 38.49   |
| gnl UG Ssc#S18551209 | darkorange    | 143.46672 | 29.442892 | 0.9486163 | 0.01387382 | 144.588 |
| gnl UG Ssc#S18551494 | blue          | 657.22926 | 118.57607 | 0.943926  | 0.01580481 | 25.27   |
| gnl UG Ssc#S18551520 | darkmagenta   | 110.30881 | 8.9516192 | 0.9263673 | 0.02371832 | 7.846   |
| gnl UG Ssc#S18551559 | turquoise     | 392.92149 | 61.652636 | 0.0482776 | 0.9385549  | 8.012   |
| gnl UG Ssc#S18551571 | blue          | 938.68723 | 148.75848 | 0.9921076 | 0.00084068 | 22.328  |
| gnl UG Ssc#S18551577 | brown         | 735.13785 | 118.07266 | 0.9569122 | 0.01066692 | 14.4    |
| gnl UG Ssc#S18551614 | red           | 938.82636 | 125.89874 | 0.9961582 | 0.00028568 | 1.614   |
| gnl UG Ssc#S18551801 | blue          | 836.20434 | 121.6062  | 0.94492   | 0.01538877 | 36.224  |
| gnl UG Ssc#S18551834 | paleturquoise | 164.63467 | 19.568092 | 0.8976211 | 0.03871377 | 69.614  |
| gnl UG Ssc#S18551845 | royalblue     | 824.4534  | 54.689456 | 0.961234  | 0.00910896 | 49.928  |
| gnl UG Ssc#S18552012 | turquoise     | 255.96665 | 102.20631 | 0.7239938 | 0.16667092 | 111.7   |
| gnl UG Ssc#S18552237 | turquoise     | 461.09061 | 153.09261 | 0.9007119 | 0.03699166 | 8.602   |
| gnl UG Ssc#S18552312 | turquoise     | 612.15948 | 153.85244 | 0.8392143 | 0.07549932 | 25.242  |
| gnl UG Ssc#S18552383 | navy          | 71.981367 | 13.4231   | 0.6477347 | 0.2372695  | 63.146  |
| gnl UG Ssc#S18552404 | yellow        | 294.55485 | 134.6428  | 0.9993096 | 2.18E-05   | 24.054  |
| gnl UG Ssc#S18552570 | salmon        | 230.64752 | 73.026861 | 0.9859439 | 0.00199625 | 130.354 |
| gnl UG Ssc#S18552999 | salmon        | 195.26922 | 70.027207 | 0.9777621 | 0.00396752 | 18.358  |
| gnl UG Ssc#S18553035 | darkred       | 65.12127  | 2.1092339 | 0.1199045 | 0.84769945 | 202.584 |
| gnl UG Ssc#S18553137 | green         | 863.66192 | 112.64851 | 0.9917116 | 0.00090469 | 20.644  |
| gnl UG Ssc#S18553158 | yellow        | 285.71999 | 121.44848 | 0.9772958 | 0.00409268 | 64.642  |
| gnl UG Ssc#S18553245 | turquoise     | 404.96599 | 142.24225 | 0.8711973 | 0.05440607 | 23.212  |
| gnl UG Ssc#S18553368 | turquoise     | 268.02305 | 106.17267 | 0.7621113 | 0.13420108 | 13.178  |
| gnl UG Ssc#S18553403 | magenta       | 190.33557 | 73.344725 | 0.9599694 | 0.00955646 | 507.954 |
| gnl UG Ssc#S18553581 | green         | 942.85682 | 107.37288 | 0.9768993 | 0.00420012 | 34.422  |
| gnl UG Ssc#S18553619 | magenta       | 229.63245 | 79.381548 | 0.9802642 | 0.00331839 | 3.682   |
| gnl UG Ssc#S18553622 | magenta       | 343.34959 | 84.550121 | 0.9928356 | 0.00072717 | 10.568  |
| gnl UG Ssc#S18553623 | green         | 750.82546 | 110.74984 | 0.9886875 | 0.00144189 | 6.888   |
| gnl UG Ssc#S18553702 | yellow        | 135.31005 | 61.325004 | 0.8218586 | 0.0878055  | 17.572  |
| gnl UG Ssc#S18553815 | greenyellow   | 166.51187 | 35.670441 | 0.9276021 | 0.0231286  | 2.984   |
| gnl UG Ssc#S18553939 | magenta       | 234.29256 | 82.096957 | 0.9879344 | 0.00158806 | 7.384   |
| gnl UG Ssc#S18554195 | turquoise     | 181.7556  | 45.132045 | 0.5167165 | 0.37267392 | 238.488 |
| gnl UG Ssc#S18554238 | turquoise     | 606.11546 | 181.83388 | 0.9365027 | 0.01902331 | 8.91    |
| gnl UG Ssc#S18554366 | green         | 967.37018 | 106.95924 | 0.9782188 | 0.00384621 | 10.212  |
| gnl UG Ssc#S18554454 | magenta       | 230.52417 | 81.327642 | 0.9855992 | 0.00207002 | 2.95    |
| gnl UG Ssc#S18554465 | green         | 814.95291 | 114.2318  | 0.9945007 | 0.00048914 | 6.364   |
| gnl UG Ssc#S18554486 | turquoise     | 449.0966  | 149.90894 | 0.8768058 | 0.05093622 | 14.062  |
| gnl UG Ssc#S18554583 | violet        | 900.45231 | 46.910847 | 0.9916158 | 0.00092041 | 3.438   |
| gnl UG Ssc#S18554602 | orange        | 313.62869 | 34.953952 | 0.9822965 | 0.0028201  | 9.272   |
| gnl UG Ssc#S18554787 | brown         | 665.17874 | 125.14562 | 0.9760763 | 0.00442601 | 30.396  |
| gnl UG Ssc#S18554865 | darkgreen     | 91.917875 | 18.865024 | 0.76695   | 0.13022991 | 14.386  |
| gnl UG Ssc#S18554887 | darkturquoise | 135.73978 | 36.306205 | 0.9356868 | 0.01938876 | 50.798  |
| gnl UG Ssc#S18554897 | lightgreen    | 471.86569 | 36.322253 | 0.8890347 | 0.04362652 | 12.022  |
| gnl UG Ssc#S18555004 | darkred       | 156.39119 | 36.88601  | 0.9394878 | 0.01770586 | 39.044  |
| gnl UG Ssc#S18555055 | brown         | 756.77774 | 132.64467 | 0.9901146 | 0.00117809 | 13.662  |
| gnl UG Ssc#S18555062 | lightcyan     | 683.8715  | 47.187344 | 0.9164535 | 0.02862248 | 10.322  |

|                      |               |           |           |           |            |         |
|----------------------|---------------|-----------|-----------|-----------|------------|---------|
| gnl UG Ssc#S18555355 | blue          | 986.27344 | 139.99998 | 0.9769734 | 0.00417997 | 10.672  |
| gnl UG Ssc#S18555410 | turquoise     | 899.7946  | 211.60716 | 0.9488661 | 0.01377328 | 16.432  |
| gnl UG Ssc#S18555414 | navy          | 74.435066 | 32.79661  | 0.9572869 | 0.01052868 | 929.572 |
| gnl UG Ssc#S18555551 | turquoise     | 217.09275 | 57.131915 | 0.5795863 | 0.30574565 | 16.882  |
| gnl UG Ssc#S18555613 | brown         | 721.68427 | 125.24947 | 0.9729349 | 0.00532325 | 7.086   |
| gnl UG Ssc#S18555750 | blue          | 706.64679 | 141.57181 | 0.9849316 | 0.0022154  | 7.936   |
| gnl UG Ssc#S18555897 | brown         | 729.93962 | 123.94498 | 0.9749724 | 0.00473505 | 28.164  |
| gnl UG Ssc#S18555925 | darkred       | 101.26784 | 19.968616 | 0.752254  | 0.14239906 | 18.576  |
| gnl UG Ssc#S18556194 | lightgreen    | 341.46435 | 33.445058 | 0.8518037 | 0.06694102 | 16.118  |
| gnl UG Ssc#S18556295 | darkturquoise | 236.78909 | 44.296051 | 0.9832582 | 0.00259384 | 41.372  |
| gnl UG Ssc#S18556436 | darkred       | 184.89778 | 42.56075  | 0.9727755 | 0.00537021 | 3.792   |
| gnl UG Ssc#S18556442 | purple        | 229.39194 | 51.420842 | 0.8938159 | 0.04086786 | 10.42   |
| gnl UG Ssc#S18556589 | navy          | 79.039962 | 35.73731  | 0.9322924 | 0.02093289 | 28.894  |
| gnl UG Ssc#S18556801 | darkgreen     | 245.35905 | 42.236294 | 0.9882616 | 0.00152398 | 42.882  |
| gnl UG Ssc#S18556879 | blue          | 651.68068 | 136.77341 | 0.9772185 | 0.00411357 | 2.252   |
| gnl UG Ssc#S18556951 | green         | 593.65175 | 96.24633  | 0.9575735 | 0.01042333 | 24.568  |
| gnl UG Ssc#S18557192 | lightyellow   | 634.05991 | 57.447298 | 0.972491  | 0.0054544  | 4.412   |
| gnl UG Ssc#S18557214 | midnightblue  | 742.89038 | 71.932719 | 0.9805086 | 0.00325705 | 3.39    |
| gnl UG Ssc#S18557422 | darkturquoise | 213.16832 | 44.695176 | 0.9834289 | 0.00255435 | 19.44   |
| gnl UG Ssc#S18557470 | grey60        | 282.55867 | 62.798087 | 0.9792174 | 0.00358529 | 37.094  |
| gnl UG Ssc#S18557502 | brown         | 604.52141 | 127.64085 | 0.9889312 | 0.0013956  | 6.794   |
| gnl UG Ssc#S18557542 | yellow        | 251.0617  | 101.6859  | 0.9326362 | 0.02077478 | 29.664  |
| gnl UG Ssc#S18557598 | green         | 796.38823 | 108.71341 | 0.9840068 | 0.0024221  | 7.946   |
| gnl UG Ssc#S18557699 | brown         | 831.02224 | 116.31605 | 0.9519268 | 0.01256122 | 10.696  |
| gnl UG Ssc#S18557771 | yellow        | 289.77829 | 132.61363 | 0.9958964 | 0.00031537 | 2.772   |
| gnl UG Ssc#S18557837 | paleturquoise | 173.07571 | 24.827722 | 0.9648067 | 0.00788347 | 165.334 |
| gnl UG Ssc#S18557900 | brown         | 572.49617 | 105.97875 | 0.9410202 | 0.01704154 | 14.184  |
| gnl UG Ssc#S18557979 | royalblue     | 456.85851 | 56.775262 | 0.9711188 | 0.00586633 | 7.39    |
| gnl UG Ssc#S18557981 | pink          | 894.62975 | 149.62591 | 0.9996875 | 6.63E-06   | 1.476   |
| gnl UG Ssc#S18558242 | red           | 901.54092 | 126.39498 | 0.9972807 | 0.00017015 | 4.706   |
| gnl UG Ssc#S18558291 | midnightblue  | 979.83523 | 73.955348 | 0.9856665 | 0.00205555 | 15.092  |
| gnl UG Ssc#S18558299 | blue          | 799.4294  | 149.50193 | 0.9948975 | 0.0004372  | 30.594  |
| gnl UG Ssc#S19537170 | white         | 966.12684 | 46.886121 | 0.9936876 | 0.00060148 | 57.954  |
| gnl UG Ssc#S19537267 | yellow        | 300.60459 | 124.52119 | 0.9800091 | 0.00338281 | 7.506   |
| gnl UG Ssc#S19537684 | turquoise     | 196.29441 | 79.227571 | 0.6453199 | 0.23961509 | 0.732   |
| gnl UG Ssc#S19537979 | yellow        | 181.28798 | 57.532164 | 0.8137062 | 0.09377936 | 12.772  |
| gnl UG Ssc#S19538858 | grey60        | 289.39021 | 60.483563 | 0.9700619 | 0.00619028 | 8.67    |
| gnl UG Ssc#S19538970 | white         | 948.48679 | 47.170635 | 0.9881552 | 0.00154473 | 21.278  |
| gnl UG Ssc#S19538990 | greenyellow   | 181.467   | 38.515569 | 0.9672076 | 0.00709327 | 8.366   |
| gnl UG Ssc#S19539315 | tan           | 124.92017 | 37.195872 | 0.9236859 | 0.02501532 | 15.7    |
| gnl UG Ssc#S19539468 | midnightblue  | 932.00442 | 77.228965 | 0.9950185 | 0.00042174 | 20.276  |
| gnl UG Ssc#S19539494 | magenta       | 174.58419 | 62.789634 | 0.9277259 | 0.02306976 | 1.884   |
| gnl UG Ssc#S19539620 | green         | 486.40711 | 80.003705 | 0.9155537 | 0.02908211 | 53.214  |
| gnl UG Ssc#S19539691 | greenyellow   | 219.65777 | 40.140952 | 0.9780558 | 0.00388936 | 13.414  |
| gnl UG Ssc#S19539740 | grey60        | 286.2825  | 56.975502 | 0.9574497 | 0.01046879 | 32.392  |
| gnl UG Ssc#S19540060 | black         | 691.15515 | 100.58018 | 0.9829305 | 0.00267024 | 2.88    |
| gnl UG Ssc#S19540140 | darkturquoise | 251.02665 | 31.258873 | 0.8980681 | 0.03846318 | 3.142   |
| gnl UG Ssc#S19540267 | turquoise     | 308.73293 | 99.709601 | 0.6832115 | 0.20355896 | 8.148   |

|                      |               |           |           |           |            |         |
|----------------------|---------------|-----------|-----------|-----------|------------|---------|
| gnl UG Ssc#S19540289 | red           | 1001.434  | 113.87192 | 0.9746772 | 0.00481886 | 8.632   |
| gnl UG Ssc#S19540314 | black         | 928.45573 | 99.494503 | 0.9793927 | 0.00354012 | 8.488   |
| gnl UG Ssc#S19540375 | black         | 781.51735 | 92.668876 | 0.9657436 | 0.00757187 | 23.758  |
| gnl UG Ssc#S19540378 | purple        | 262.82203 | 66.349784 | 0.9548215 | 0.01144895 | 21.944  |
| gnl UG Ssc#S19540384 | lightcyan     | 561.71457 | 48.179781 | 0.9263413 | 0.02373081 | 10.87   |
| gnl UG Ssc#S19540409 | midnightblue  | 925.0819  | 78.547122 | 0.9986335 | 6.06E-05   | 7.874   |
| gnl UG Ssc#S19540410 | turquoise     | 211.03863 | 79.772608 | 0.6269816 | 0.25762963 | 32.462  |
| gnl UG Ssc#S19540415 | royalblue     | 766.02314 | 60.10422  | 0.9832233 | 0.00260195 | 4.262   |
| gnl UG Ssc#S19540417 | black         | 615.45627 | 90.214006 | 0.9598817 | 0.00958776 | 0.862   |
| gnl UG Ssc#S19540505 | tan           | 154.04505 | 32.385724 | 0.8790742 | 0.04955342 | 28.902  |
| gnl UG Ssc#S19540539 | lightgreen    | 367.5988  | 32.986891 | 0.8898574 | 0.04314778 | 21.28   |
| gnl UG Ssc#S19540632 | orange        | 257.8113  | 36.178226 | 0.9846659 | 0.00227415 | 0.678   |
| gnl UG Ssc#S19540688 | navy          | 278.33422 | 28.436039 | 0.9032384 | 0.03560264 | 22.686  |
| gnl UG Ssc#S19540774 | purple        | 274.10921 | 71.423256 | 0.9718078 | 0.00565824 | 35.916  |
| gnl UG Ssc#S19540934 | midnightblue  | 761.26154 | 71.968042 | 0.9805699 | 0.00324173 | 15.258  |
| gnl UG Ssc#S19541050 | royalblue     | 521.89486 | 60.949358 | 0.9874331 | 0.00168793 | 9.712   |
| gnl UG Ssc#S19541067 | brown         | 506.51278 | 91.471042 | 0.9112589 | 0.03130791 | 23.582  |
| gnl UG Ssc#S19541084 | darkturquoise | 181.64553 | 45.045644 | 0.987633  | 0.00164788 | 137.074 |
| gnl UG Ssc#S19541103 | green         | 447.56592 | 74.6244   | 0.9002075 | 0.03727095 | 13.406  |
| gnl UG Ssc#S19541153 | magenta       | 339.30796 | 82.025251 | 0.986116  | 0.00195975 | 6.46    |
| gnl UG Ssc#S19541498 | orange        | 237.21983 | 30.979572 | 0.9576545 | 0.01039364 | 14.43   |
| gnl UG Ssc#S19541523 | blue          | 991.08599 | 134.01075 | 0.9664418 | 0.00734231 | 64.982  |
| gnl UG Ssc#S19541571 | midnightblue  | 687.1908  | 69.076333 | 0.971657  | 0.00570357 | 8.938   |
| gnl UG Ssc#S19541572 | grey60        | 250.78689 | 50.880589 | 0.9337379 | 0.02027065 | 23.174  |
| gnl UG Ssc#S19541579 | turquoise     | 679.49756 | 165.45359 | 0.8679128 | 0.0564713  | 60.24   |
| gnl UG Ssc#S19541658 | orange        | 185.82742 | 14.047596 | 0.6990068 | 0.18902411 | 15.638  |
| gnl UG Ssc#S19541728 | black         | 893.87634 | 103.04506 | 0.9872693 | 0.00172101 | 20.872  |
| gnl UG Ssc#S19541992 | green         | 704.64825 | 88.063787 | 0.9350543 | 0.01967354 | 11.024  |
| gnl UG Ssc#S19542004 | greenyellow   | 178.39339 | 29.678306 | 0.8368607 | 0.0771344  | 100.56  |
| gnl UG Ssc#S19542017 | brown         | 748.5538  | 126.96591 | 0.9755255 | 0.00457936 | 27.308  |
| gnl UG Ssc#S19542031 | royalblue     | 429.38256 | 54.236794 | 0.9607552 | 0.00927756 | 84.09   |
| gnl UG Ssc#S19542061 | blue          | 783.25431 | 150.18688 | 0.9968304 | 0.0002141  | 26.676  |
| gnl UG Ssc#S19542087 | lightyellow   | 506.8248  | 63.223442 | 0.995125  | 0.0004083  | 11.318  |
| gnl UG Ssc#S19542100 | orange        | 238.31487 | 18.541036 | 0.8026238 | 0.10208947 | 8.898   |
| gnl UG Ssc#S19542226 | darkturquoise | 179.83386 | 41.136767 | 0.9668515 | 0.00720874 | 32.202  |
| gnl UG Ssc#S19542246 | turquoise     | 309.69292 | 101.98517 | 0.7158961 | 0.1738265  | 3.184   |
| gnl UG Ssc#S19542298 | turquoise     | 704.72    | 173.94921 | 0.9050209 | 0.03463298 | 10.67   |
| gnl UG Ssc#S19542511 | orange        | 123.42128 | 23.448643 | 0.8720777 | 0.05385664 | 3.74    |
| gnl UG Ssc#S19542514 | turquoise     | 1000.3422 | 217.8916  | 0.9483682 | 0.0139739  | 5.834   |
| gnl UG Ssc#S19542525 | greenyellow   | 135.00098 | 21.950977 | 0.8308482 | 0.08135996 | 114.05  |
| gnl UG Ssc#S19542622 | turquoise     | 177.4843  | 43.632789 | -0.332549 | 0.58452475 | 20.984  |
| gnl UG Ssc#S19542649 | lightgreen    | 490.03113 | 35.558192 | 0.9501344 | 0.0132666  | 7.6     |
| gnl UG Ssc#S19542654 | yellow        | 285.7925  | 112.11372 | 0.9530605 | 0.01212159 | 5.86    |
| gnl UG Ssc#S19542684 | black         | 836.85064 | 102.30746 | 0.9861417 | 0.00195431 | 44.948  |
| gnl UG Ssc#S19542699 | turquoise     | 424.43832 | 115.84822 | 0.8013558 | 0.10305382 | 11.566  |
| gnl UG Ssc#S19542749 | brown         | 800.56342 | 126.01776 | 0.9728403 | 0.00535111 | 106.928 |
| gnl UG Ssc#S19542862 | midnightblue  | 731.55586 | 72.13208  | 0.980988  | 0.00313786 | 9.528   |
| gnl UG Ssc#S19543319 | blue          | 774.83778 | 148.03031 | 0.9936267 | 0.00061019 | 11.206  |

|                      |              |           |           |           |            |         |
|----------------------|--------------|-----------|-----------|-----------|------------|---------|
| gnl UG Ssc#S19543409 | turquoise    | 420.94434 | 129.81931 | 0.8159708 | 0.09210787 | 4.582   |
| gnl UG Ssc#S19543418 | red          | 973.24303 | 117.77398 | 0.9822102 | 0.00284071 | 21.38   |
| gnl UG Ssc#S19543452 | violet       | 932.52361 | 46.397601 | 0.9813407 | 0.00305111 | 6.388   |
| gnl UG Ssc#S19543565 | grey60       | 306.00179 | 67.239283 | 0.9930873 | 0.00068921 | 13.094  |
| gnl UG Ssc#S19543756 | black        | 714.97128 | 94.470419 | 0.9706863 | 0.0059982  | 3.824   |
| gnl UG Ssc#S19543764 | magenta      | 349.26084 | 75.960895 | 0.9689334 | 0.00654245 | 21.192  |
| gnl UG Ssc#S19544231 | white        | 265.5444  | 14.643953 | -0.622222 | 0.26236201 | 6.228   |
| gnl UG Ssc#S19545362 | black        | 804.71183 | 102.09031 | 0.9860169 | 0.00198074 | 64.432  |
| gnl UG Ssc#S19545397 | skyblue      | 430.19033 | 43.376659 | 0.9940893 | 0.00054501 | 235.046 |
| gnl UG Ssc#S19545412 | salmon       | 217.67475 | 67.448971 | 0.9682889 | 0.00674643 | 6.842   |
| gnl UG Ssc#S19545451 | navy         | 190.12464 | 36.894045 | 0.943416  | 0.01601968 | 14.724  |
| gnl UG Ssc#S19545467 | black        | 942.98953 | 98.817715 | 0.9781297 | 0.00386977 | 24.364  |
| gnl UG Ssc#S19545641 | lightyellow  | 344.64774 | 57.80163  | 0.9759563 | 0.00445925 | 4.888   |
| gnl UG Ssc#S19545786 | royalblue    | 836.37002 | 54.767795 | 0.9617061 | 0.00894372 | 9.156   |
| gnl UG Ssc#S19545977 | midnightblue | 923.57985 | 73.892436 | 0.9857725 | 0.00203282 | 81.978  |
| gnl UG Ssc#S19546005 | lightgreen   | 506.3479  | 37.785645 | 0.9162234 | 0.02873982 | 11.256  |
| gnl UG Ssc#S19546024 | skyblue      | 442.59988 | 42.756601 | 0.9914457 | 0.00094853 | 13.186  |
| gnl UG Ssc#S19546046 | darkgreen    | 210.81755 | 23.776209 | 0.8157285 | 0.09228627 | 14.4    |
| gnl UG Ssc#S19546062 | tan          | 213.68687 | 44.244233 | 0.9599443 | 0.0095654  | 13.104  |
| gnl UG Ssc#S19546082 | turquoise    | 507.02135 | 164.41469 | 0.9105931 | 0.03165766 | 18.264  |
| gnl UG Ssc#S19546091 | tan          | 145.95141 | 45.074937 | 0.9807295 | 0.00320195 | 23.972  |
| gnl UG Ssc#S19546104 | lightyellow  | 399.90332 | 59.370028 | 0.9818052 | 0.00293809 | 6.838   |
| gnl UG Ssc#S19546106 | turquoise    | 198.72091 | 78.525681 | 0.5954358 | 0.28941594 | 48.568  |
| gnl UG Ssc#S19546114 | darkred      | 126.65317 | 29.445663 | 0.8757604 | 0.0515775  | 12.412  |
| gnl UG Ssc#S19546165 | blue         | 823.7533  | 149.10814 | 0.9941621 | 0.00053499 | 4.58    |
| gnl UG Ssc#S19546218 | darkorange   | 133.36712 | 33.768012 | 0.9835394 | 0.00252889 | 14.712  |
| gnl UG Ssc#S19546257 | royalblue    | 491.39946 | 59.13044  | 0.9805611 | 0.00324392 | 24.882  |
| gnl UG Ssc#S19546269 | brown        | 774.54116 | 133.94795 | 0.9915829 | 0.00092582 | 8.596   |
| gnl UG Ssc#S19546291 | greenyellow  | 174.14445 | 30.821504 | 0.9119415 | 0.03095064 | 7.35    |
| gnl UG Ssc#S19546334 | turquoise    | 1020.5283 | 213.98067 | 0.9390351 | 0.01790368 | 12.28   |
| gnl UG Ssc#S19547691 | lightgreen   | 275.3976  | 32.141657 | 0.8698782 | 0.05523261 | 115.694 |
| gnl UG Ssc#S19547811 | turquoise    | 473.66316 | 143.99171 | 0.874718  | 0.05221947 | 8.71    |
| gnl UG Ssc#S19547860 | midnightblue | 788.08559 | 70.591786 | 0.9765223 | 0.00430312 | 26.28   |
| gnl UG Ssc#S19547879 | lightgreen   | 232.30823 | 28.616384 | 0.8532049 | 0.06600844 | 3.088   |
| gnl UG Ssc#S19548031 | darkorange   | 63.045681 | 14.754205 | 0.7280466 | 0.16312241 | 11.858  |
| gnl UG Ssc#S19548740 | white        | 243.40119 | 17.127126 | -0.683241 | 0.20353118 | 64.64   |
| gnl UG Ssc#S19548981 | darkgrey     | 1002.2189 | 50.728738 | 0.9828888 | 0.00268001 | 10.322  |
| gnl UG Ssc#S19549058 | brown        | 712.2742  | 132.69572 | 0.9903533 | 0.00113573 | 11.094  |
| gnl UG Ssc#S19549165 | turquoise    | 997.15564 | 220.25303 | 0.9567662 | 0.01072093 | 12.104  |
| gnl UG Ssc#S19549174 | turquoise    | 775.41143 | 208.29948 | 0.9676527 | 0.0069498  | 7.16    |
| gnl UG Ssc#S19549267 | turquoise    | 699.23362 | 184.83107 | 0.909406  | 0.0322843  | 6.55    |
| gnl UG Ssc#S19549653 | navy         | 50.525259 | 25.401521 | 0.8378716 | 0.07643079 | 26.434  |
| gnl UG Ssc#S19550340 | grey60       | 237.41524 | 48.871073 | 0.9271314 | 0.02335283 | 2.46    |
| gnl UG Ssc#S19550965 | pink         | 940.66374 | 148.63009 | 0.998156  | 9.50E-05   | 42.192  |
| gnl UG Ssc#S20938341 | darkgreen    | 190.53194 | 20.408017 | 0.7586626 | 0.13705287 | 5.236   |
| gnl UG Ssc#S20944779 | salmon       | 205.58847 | 69.7549   | 0.9762175 | 0.00438697 | 6.48    |
| gnl UG Ssc#S20945025 | grey60       | 309.64421 | 67.757728 | 0.9946223 | 0.00047301 | 113.82  |
| gnl UG Ssc#S20945368 | tan          | 133.1585  | 24.987378 | 0.7853349 | 0.11547089 | 3.142   |



|                      |               |           |           |           |            |         |
|----------------------|---------------|-----------|-----------|-----------|------------|---------|
| gnl UG Ssc#S21107071 | turquoise     | 990.21466 | 208.25089 | 0.9344487 | 0.0199475  | 29.25   |
| gnl UG Ssc#S21107119 | green         | 701.12214 | 77.816146 | 0.9056742 | 0.03427973 | 3.922   |
| gnl UG Ssc#S21550606 | navy          | 936.7011  | 18.806275 | -0.057201 | 0.92720857 | 2.962   |
| gnl UG Ssc#S21554547 | yellow        | 263.81736 | 115.83071 | 0.9641506 | 0.00810415 | 7.47    |
| gnl UG Ssc#S21558492 | white         | 919.03342 | 47.355391 | 0.9758989 | 0.0044752  | 11.398  |
| gnl UG Ssc#S21573643 | turquoise     | 889.58333 | 217.03392 | 0.966843  | 0.00721149 | 4.236   |
| gnl UG Ssc#S21575132 | turquoise     | 229.37674 | 60.732598 | 0.5493962 | 0.33747234 | 2.232   |
| gnl UG Ssc#S21575274 | turquoise     | 405.23079 | 139.33432 | 0.8590899 | 0.06213664 | 25.24   |
| gnl UG Ssc#S22271675 | salmon        | 162.628   | 59.408029 | 0.9435438 | 0.01596576 | 10.676  |
| gnl UG Ssc#S22272334 | lightyellow   | 637.90087 | 52.033785 | 0.9496982 | 0.01344016 | 8.884   |
| gnl UG Ssc#S22272834 | pink          | 970.00414 | 144.99987 | 0.9929003 | 0.00071736 | 5.034   |
| gnl UG Ssc#S22273263 | salmon        | 175.82583 | 53.341518 | 0.9193262 | 0.02717104 | 5.83    |
| gnl UG Ssc#S22273337 | black         | 527.83353 | 81.510259 | 0.9377103 | 0.01848666 | 5.854   |
| gnl UG Ssc#S22274193 | turquoise     | 252.0118  | 94.056872 | 0.6994027 | 0.18866377 | 10.904  |
| gnl UG Ssc#S22274398 | skyblue       | 494.15398 | 44.19388  | 0.9981557 | 9.50E-05   | 10.974  |
| gnl UG Ssc#S22274609 | red           | 853.99243 | 123.21115 | 0.9920603 | 0.00084825 | 6.866   |
| gnl UG Ssc#S22274737 | orange        | 184.71879 | 33.917377 | 0.958588  | 0.01005327 | 5.194   |
| gnl UG Ssc#S22275000 | turquoise     | 655.39257 | 184.10046 | 0.9250528 | 0.02435135 | 33.356  |
| gnl UG Ssc#S22275082 | royalblue     | 688.98074 | 63.454652 | 0.9964441 | 0.00025441 | 8.51    |
| gnl UG Ssc#S22275237 | salmon        | 235.4404  | 75.691167 | 0.992909  | 0.00071603 | 16.19   |
| gnl UG Ssc#S22275831 | grey60        | 308.43917 | 67.616999 | 0.9943268 | 0.00051252 | 10.022  |
| gnl UG Ssc#S22275888 | lightgreen    | 491.47103 | 34.595142 | 0.9404485 | 0.01728842 | 7.424   |
| gnl UG Ssc#S22275958 | turquoise     | 311.19631 | 115.84796 | 0.8072725 | 0.09857753 | 26.214  |
| gnl UG Ssc#S22276100 | white         | 923.95895 | 47.595563 | 0.977856  | 0.00394248 | 2.576   |
| gnl UG Ssc#S22276642 | red           | 775.65153 | 117.78301 | 0.9830593 | 0.00264011 | 3.644   |
| gnl UG Ssc#S22277516 | turquoise     | 362.90439 | 55.149165 | 0.0313991 | 0.96002797 | 51.278  |
| gnl UG Ssc#S22277550 | pink          | 838.63131 | 145.43667 | 0.9939706 | 0.0005615  | 10.006  |
| gnl UG Ssc#S22278253 | green         | 706.87572 | 106.20538 | 0.9798017 | 0.00343546 | 9.55    |
| gnl UG Ssc#S22278643 | darkturquoise | 121.42028 | 34.267743 | 0.9269214 | 0.02345309 | 25.504  |
| gnl UG Ssc#S22279857 | turquoise     | 976.70878 | 201.62906 | 0.9238814 | 0.02492003 | 30.344  |
| gnl UG Ssc#S22279946 | green         | 582.69636 | 94.364721 | 0.953374  | 0.01200093 | 5.244   |
| gnl UG Ssc#S22280355 | lightyellow   | 310.3706  | 45.712586 | 0.926914  | 0.02345666 | 4.122   |
| gnl UG Ssc#S22281680 | magenta       | 404.46629 | 75.446037 | 0.9633126 | 0.00838888 | 10.132  |
| gnl UG Ssc#S22281703 | brown         | 282.92076 | 21.423961 | 0.6230728 | 0.26151456 | 11.04   |
| gnl UG Ssc#S22282893 | turquoise     | 211.64921 | 86.198657 | 0.6621438 | 0.22340594 | 12.884  |
| gnl UG Ssc#S22283333 | turquoise     | 956.76316 | 202.08608 | 0.9229504 | 0.02537495 | 32.524  |
| gnl UG Ssc#S22284067 | tan           | 135.50663 | 32.276321 | 0.8780479 | 0.05017754 | 8.456   |
| gnl UG Ssc#S22284475 | turquoise     | 826.24472 | 197.17514 | 0.9403379 | 0.01733631 | 18.532  |
| gnl UG Ssc#S22284677 | turquoise     | 342.72032 | 120.13708 | 0.8177318 | 0.09081444 | 4.618   |
| gnl UG Ssc#S22285435 | grey60        | 298.25948 | 62.355732 | 0.9766711 | 0.00426235 | 5.238   |
| gnl UG Ssc#S22286222 | orange        | 92.43738  | 21.357685 | 0.8162646 | 0.09189168 | 9.398   |
| gnl UG Ssc#S22286260 | magenta       | 282.56259 | 81.954226 | 0.9880963 | 0.00155624 | 17.074  |
| gnl UG Ssc#S22286650 | black         | 646.89029 | 96.546055 | 0.9744994 | 0.00486957 | 9.934   |
| gnl UG Ssc#S22287254 | lightyellow   | 396.38173 | 52.406178 | 0.9568066 | 0.01070597 | 26.444  |
| gnl UG Ssc#S22287363 | midnightblue  | 920.24846 | 78.346336 | 0.9980913 | 0.00010008 | 7.9     |
| gnl UG Ssc#S22304929 | lightcyan     | 330.87264 | 54.658322 | 0.9790682 | 0.0036239  | 4.598   |
| gnl UG Ssc#S22312937 | blue          | 927.52472 | 148.49316 | 0.9917335 | 0.00090111 | 7.208   |
| gnl UG Ssc#S22313154 | darkturquoise | 214.21316 | 44.226831 | 0.9807243 | 0.00320325 | 176.978 |

|                      |               |           |           |           |            |         |
|----------------------|---------------|-----------|-----------|-----------|------------|---------|
| gnl UG Ssc#S22313956 | pink          | 863.60806 | 148.75168 | 0.9985468 | 6.65E-05   | 11.062  |
| gnl UG Ssc#S22316206 | skyblue       | 520.75554 | 44.099292 | 0.9973272 | 0.00016581 | 13.52   |
| gnl UG Ssc#S23689583 | turquoise     | 874.34406 | 201.92272 | 0.9312713 | 0.02140487 | 10.656  |
| gnl UG Ssc#S23689697 | red           | 958.36023 | 120.30653 | 0.9865149 | 0.001876   | 2.482   |
| gnl UG Ssc#S23689787 | yellow        | 181.30718 | 83.855239 | 0.8881884 | 0.04412073 | 35.788  |
| gnl UG Ssc#S23689840 | yellow        | 294.25073 | 125.81589 | 0.9817167 | 0.00295951 | 34.43   |
| gnl UG Ssc#S23689938 | pink          | 922.41256 | 148.65775 | 0.9982624 | 8.69E-05   | 8.516   |
| gnl UG Ssc#S23690002 | purple        | 218.59412 | 61.966309 | 0.9413316 | 0.01690756 | 31.89   |
| gnl UG Ssc#S23690003 | navy          | 138.09466 | 40.229868 | 0.9715908 | 0.00572351 | 16.012  |
| gnl UG Ssc#S23690384 | salmon        | 211.85509 | 68.405541 | 0.9710479 | 0.00588787 | 6.712   |
| gnl UG Ssc#S23690475 | brown         | 876.81658 | 115.81838 | 0.9542843 | 0.01165284 | 17.852  |
| gnl UG Ssc#S23690683 | black         | 713.5623  | 102.05622 | 0.9861496 | 0.00195264 | 17.61   |
| gnl UG Ssc#S23690802 | darkgrey      | 1011.6454 | 49.436287 | 0.9771188 | 0.00414052 | 22.296  |
| gnl UG Ssc#S23690807 | brown         | 439.42    | 89.178482 | 0.9021346 | 0.0362074  | 9.384   |
| gnl UG Ssc#S23690967 | green         | 770.81759 | 109.64655 | 0.9863499 | 0.0019105  | 20.15   |
| gnl UG Ssc#S23691069 | navy          | 857.93329 | 18.528427 | -0.116761 | 0.85167352 | 27.26   |
| gnl UG Ssc#S23691079 | midnightblue  | 929.07851 | 77.829573 | 0.9968149 | 0.00021568 | 40.656  |
| gnl UG Ssc#S23691136 | darkturquoise | 228.40167 | 41.792724 | 0.9707408 | 0.00598153 | 27.896  |
| gnl UG Ssc#S23691157 | turquoise     | 541.37748 | 59.396405 | 0.3025798 | 0.6207056  | 8.138   |
| gnl UG Ssc#S23691372 | grey60        | 296.97318 | 61.30422  | 0.9730397 | 0.00529246 | 26.014  |
| gnl UG Ssc#S23691718 | darkturquoise | 174.62184 | 37.318787 | 0.9403159 | 0.01734581 | 46.236  |
| gnl UG Ssc#S23691805 | darkred       | 145.09072 | 35.846972 | 0.9361259 | 0.01919182 | 9.482   |
| gnl UG Ssc#S23691900 | pink          | 966.98102 | 143.89986 | 0.9913522 | 0.00096412 | 7.316   |
| gnl UG Ssc#S23691927 | magenta       | 412.40467 | 79.504277 | 0.9743809 | 0.00490348 | 5.262   |
| gnl UG Ssc#S23692548 | magenta       | 380.175   | 79.607168 | 0.9771871 | 0.00412205 | 6.262   |
| gnl UG Ssc#S23692872 | blue          | 879.26216 | 148.09012 | 0.992467  | 0.00078397 | 19.126  |
| gnl UG Ssc#S23692986 | yellow        | 309.55553 | 119.84716 | 0.9712165 | 0.00583668 | 11.616  |
| gnl UG Ssc#S23693254 | darkorange    | 81.827663 | 16.532595 | 0.7682174 | 0.12919562 | 21.344  |
| gnl UG Ssc#S23693266 | yellow        | 310.31918 | 125.3929  | 0.9818273 | 0.00293275 | 19.37   |
| gnl UG Ssc#S23693320 | lightgreen    | 525.24035 | 38.408138 | 0.9424997 | 0.01640807 | 9.728   |
| gnl UG Ssc#S23693357 | purple        | 264.29484 | 62.940731 | 0.942102  | 0.01657758 | 205.098 |
| gnl UG Ssc#S23693410 | blue          | 740.48678 | 143.47793 | 0.9864061 | 0.00189873 | 10.042  |
| gnl UG Ssc#S23693441 | turquoise     | 491.49538 | 59.636596 | 0.2372011 | 0.70084263 | 7.302   |
| gnl UG Ssc#S23694531 | green         | 813.71022 | 109.84252 | 0.9849597 | 0.00220922 | 17.318  |
| gnl UG Ssc#S23694535 | turquoise     | 347.77713 | 60.14568  | -0.070051 | 0.91088078 | 5.57    |
| gnl UG Ssc#S23694970 | black         | 930.88715 | 95.079295 | 0.9694047 | 0.00639458 | 16.624  |
| gnl UG Ssc#S23695084 | brown         | 715.6268  | 127.86162 | 0.9789904 | 0.00364407 | 13.296  |
| gnl UG Ssc#S23695102 | tan           | 110.20738 | 32.824229 | 0.8734588 | 0.05299826 | 26.1    |
| gnl UG Ssc#S23695121 | grey          | 393.83816 | 14.366637 | 0.9796359 | 0.00347777 | 4.238   |
| gnl UG Ssc#S23695134 | red           | 901.00883 | 126.87972 | 0.9980789 | 0.00010105 | 4.036   |
| gnl UG Ssc#S23695164 | blue          | 745.42089 | 143.73628 | 0.9861063 | 0.0019618  | 3.688   |
| gnl UG Ssc#S23695204 | blue          | 882.02141 | 140.74084 | 0.9803352 | 0.00330051 | 35.044  |
| gnl UG Ssc#S23695295 | skyblue       | 472.0266  | 41.130205 | 0.9835555 | 0.00252517 | 10.712  |
| gnl UG Ssc#S23695328 | turquoise     | 982.89672 | 217.30842 | 0.9487322 | 0.01382716 | 9.52    |
| gnl UG Ssc#S23695397 | royalblue     | 627.26765 | 63.17668  | 0.9959515 | 0.00030904 | 6.256   |
| gnl UG Ssc#S23695759 | navy          | 241.09091 | 34.101055 | 0.9220084 | 0.02583796 | 22.42   |
| gnl UG Ssc#S23695896 | pink          | 983.21053 | 139.70417 | 0.9850687 | 0.00218526 | 55.714  |
| gnl UG Ssc#S23696502 | skyblue       | 570.61191 | 42.835213 | 0.9898788 | 0.00122045 | 22.116  |

|                      |               |           |           |           |            |         |
|----------------------|---------------|-----------|-----------|-----------|------------|---------|
| gnl UG Ssc#S23696553 | darkorange    | 98.985227 | 26.749754 | 0.9160114 | 0.02884803 | 10.78   |
| gnl UG Ssc#S23696616 | skyblue       | 544.19557 | 43.3845   | 0.9932916 | 0.00065891 | 55.488  |
| gnl UG Ssc#S23696619 | midnightblue  | 898.49935 | 78.586627 | 0.9988134 | 4.91E-05   | 10.564  |
| gnl UG Ssc#S23696689 | green         | 976.54818 | 106.18092 | 0.9750615 | 0.00470986 | 4.112   |
| gnl UG Ssc#S23696700 | brown         | 708.80682 | 135.51753 | 0.9957493 | 0.00033247 | 2.29    |
| gnl UG Ssc#S23696826 | skyblue       | 378.94275 | 39.067438 | 0.9717616 | 0.00567211 | 8.832   |
| gnl UG Ssc#S23697216 | darkgreen     | 207.56493 | 22.790329 | 0.7965939 | 0.1066999  | 64.26   |
| gnl UG Ssc#S23697230 | brown         | 189.52432 | 31.256023 | 0.6680706 | 0.21777081 | 23.756  |
| gnl UG Ssc#S23697813 | yellow        | 290.67833 | 133.33569 | 0.9969047 | 0.00020662 | 6.828   |
| gnl UG Ssc#S23697932 | orange        | 354.8827  | 34.534078 | 0.9787852 | 0.00369748 | 13.008  |
| gnl UG Ssc#S23698058 | brown         | 551.80114 | 116.19046 | 0.969078  | 0.00649698 | 6.43    |
| gnl UG Ssc#S23698110 | brown         | 533.6517  | 114.29002 | 0.965438  | 0.00767304 | 11.33   |
| gnl UG Ssc#S23698716 | navy          | 121.68511 | 38.503148 | 0.9406344 | 0.01720801 | 70.35   |
| gnl UG Ssc#S23698735 | darkorange    | 164.52508 | 31.915473 | 0.9773311 | 0.00408317 | 4.852   |
| gnl UG Ssc#S23698752 | lightgreen    | 473.41365 | 35.527024 | 0.946284  | 0.01482377 | 20.642  |
| gnl UG Ssc#S23698821 | salmon        | 242.03103 | 68.597977 | 0.9705469 | 0.0060409  | 9.064   |
| gnl UG Ssc#S23699498 | violet        | 851.02099 | 45.968008 | 0.9945124 | 0.00048758 | 1.586   |
| gnl UG Ssc#S23699782 | darkturquoise | 184.31375 | 45.86773  | 0.9916758 | 0.00091056 | 0.116   |
| gnl UG Ssc#S23699859 | red           | 1010.9087 | 112.47799 | 0.9721454 | 0.00555721 | 7.148   |
| gnl UG Ssc#S23699941 | pink          | 842.34213 | 141.85028 | 0.9890012 | 0.0013824  | 3.172   |
| gnl UG Ssc#S23700002 | turquoise     | 187.69878 | 67.470532 | 0.6116617 | 0.27294409 | 133.324 |
| gnl UG Ssc#S23700016 | magenta       | 321.14915 | 75.431346 | 0.96798   | 0.00684494 | 5.844   |
| gnl UG Ssc#S23700159 | yellow        | 305.48539 | 124.18054 | 0.9815683 | 0.00299555 | 191.884 |
| gnl UG Ssc#S23700422 | purple        | 288.92792 | 79.053235 | 0.9962918 | 0.00027092 | 495.626 |
| gnl UG Ssc#S23701109 | green         | 956.62208 | 106.78775 | 0.9756966 | 0.00453152 | 24.404  |
| gnl UG Ssc#S23701196 | brown         | 721.43515 | 131.35033 | 0.9855117 | 0.00208889 | 18.978  |
| gnl UG Ssc#S23701257 | turquoise     | 1014.0038 | 202.19604 | 0.9162708 | 0.02871565 | 14.448  |
| gnl UG Ssc#S23701295 | darkgrey      | 991.98158 | 49.372098 | 0.9774052 | 0.0040632  | 3.606   |
| gnl UG Ssc#S23701405 | lightcyan     | 516.31651 | 56.946995 | 0.9764227 | 0.00433046 | 2.604   |
| gnl UG Ssc#S23701516 | yellow        | 308.03509 | 123.32676 | 0.976765  | 0.00423671 | 17.738  |
| gnl UG Ssc#S23755332 | pink          | 894.62975 | 149.62591 | 0.9996875 | 6.63E-06   | 3.53    |
| gnl UG Ssc#S23755373 | darkgreen     | 71.5464   | 12.413019 | 0.6289589 | 0.25567036 | 27.916  |
| gnl UG Ssc#S23755435 | navy          | 1009.868  | 17.623853 | 0.1093281 | 0.86107693 | 133.828 |
| gnl UG Ssc#S23755492 | red           | 894.62975 | 127.58416 | 0.9992509 | 2.46E-05   | 0.256   |
| NA                   | royalblue     | 766.27394 | 58.879186 | 0.9785157 | 0.003768   | 14.334  |
| NA                   | lightgreen    | 139.10809 | 16.529862 | 0.7098179 | 0.17925395 | 26.134  |
| NA                   | skyblue       | 631.77222 | 39.698691 | 0.9718057 | 0.00565889 | 224.852 |
| NA                   | blue          | 749.97243 | 148.74463 | 0.9948448 | 0.00044398 | 5.734   |
| NA                   | salmon        | 199.15313 | 71.581842 | 0.9828712 | 0.00268415 | 10.964  |
| NA                   | grey60        | 309.71183 | 67.443483 | 0.9939263 | 0.00056769 | 8.554   |
| NA                   | grey60        | 308.86853 | 67.471052 | 0.993676  | 0.00060313 | 3.444   |
| NA                   | turquoise     | 162.44962 | 60.104393 | 0.5696701 | 0.31607866 | 4.694   |
| NA                   | green         | 406.6307  | 59.336477 | 0.8512153 | 0.06733385 | 80.644  |
| NA                   | lightcyan     | 170.64364 | 29.682828 | 0.8067858 | 0.09894344 | 18.262  |
| NA                   | pink          | 894.62975 | 149.62591 | 0.9996875 | 6.63E-06   | 1.862   |
| NA                   | salmon        | 222.63524 | 76.720826 | 0.9965414 | 0.00024404 | 45.472  |
| NA                   | grey60        | 304.62512 | 65.69234  | 0.9879067 | 0.00159353 | 16.582  |
| NA                   | lightcyan     | 236.42875 | 45.284416 | 0.9263477 | 0.02372771 | 8.29    |

|    |               |           |           |           |            |         |
|----|---------------|-----------|-----------|-----------|------------|---------|
| NA | blue          | 979.89826 | 139.84471 | 0.9766688 | 0.00426298 | 30.196  |
| NA | darkturquoise | 217.0021  | 40.082471 | 0.9566151 | 0.01077693 | 18.052  |
| NA | brown         | 754.57407 | 134.25598 | 0.9912827 | 0.00097574 | 28.024  |
| NA | blue          | 565.21515 | 114.49649 | 0.9340396 | 0.0201333  | 13.576  |
| NA | blue          | 859.97336 | 144.8371  | 0.9863064 | 0.00191963 | 12.094  |
| NA | turquoise     | 205.53205 | 82.40131  | 0.6172036 | 0.26737703 | 5.418   |
| NA | blue          | 786.93816 | 126.37702 | 0.9543611 | 0.01162359 | 21.328  |
| NA | royalblue     | 723.25415 | 58.947298 | 0.9795312 | 0.00350457 | 86.13   |
| NA | brown         | 557.38066 | 115.74766 | 0.9684456 | 0.00669664 | 28.696  |
| NA | purple        | 113.36514 | 21.153026 | 0.7245126 | 0.16621548 | 25.598  |
| NA | turquoise     | 637.83992 | 164.92745 | 0.8813683 | 0.04816724 | 69.196  |
| NA | green         | 820.0557  | 114.83188 | 0.9956411 | 0.00034523 | 11.214  |
| NA | blue          | 430.14336 | 103.60212 | 0.9131944 | 0.03029829 | 9.676   |
| NA | yellow        | 232.50395 | 104.70656 | 0.9419965 | 0.01662266 | 5.142   |
| NA | violet        | 894.62975 | 47.034779 | 0.9933959 | 0.00064361 | 2.31    |
| NA | yellow        | 225.95661 | 67.68163  | 0.8347634 | 0.07860047 | 84.39   |
| NA | turquoise     | 344.52646 | 58.962477 | -0.012563 | 0.98400426 | 21.354  |
| NA | black         | 933.46708 | 100.4185  | 0.98153   | 0.00300488 | 22.586  |
| NA | grey          | 389.51823 | 13.628545 | 0.9682422 | 0.00676131 | 17.298  |
| NA | darkmagenta   | 104.0479  | 8.8136909 | 0.9181332 | 0.02777084 | 19.64   |
| NA | purple        | 212.98938 | 55.451398 | 0.9178378 | 0.02792003 | 19.614  |
| NA | black         | 767.90508 | 103.52557 | 0.9893181 | 0.00132315 | 14.188  |
| NA | royalblue     | 592.53957 | 59.884322 | 0.9850879 | 0.00218106 | 8.178   |
| NA | purple        | 289.73993 | 77.355764 | 0.9911819 | 0.0009927  | 24.35   |
| NA | blue          | 991.14676 | 136.27093 | 0.9705466 | 0.006041   | 3.284   |
| NA | red           | 887.26571 | 126.6702  | 0.9978162 | 0.00012247 | 2.934   |
| NA | black         | 693.31689 | 99.866943 | 0.9818334 | 0.00293128 | 16.842  |
| NA | grey60        | 300.34256 | 66.320773 | 0.9906455 | 0.00108457 | 9.758   |
| NA | green         | 901.62364 | 112.61254 | 0.9891523 | 0.00135403 | 6.558   |
| NA | turquoise     | 389.4946  | 134.32665 | 0.8232308 | 0.08681192 | 7.816   |
| NA | yellow        | 165.28551 | 58.51015  | 0.8125876 | 0.09460832 | 37.442  |
| NA | salmon        | 212.61751 | 76.026062 | 0.9949071 | 0.00043596 | 15.48   |
| NA | paleturquoise | 117.69939 | 15.88157  | 0.8777022 | 0.05038832 | 11.464  |
| NA | darkgreen     | 245.05768 | 40.263937 | 0.9759429 | 0.00446299 | 106.794 |
| NA | darkred       | 115.92128 | 18.883382 | 0.7545864 | 0.14044637 | 13.1    |
| NA | blue          | 845.1703  | 131.47026 | 0.9644131 | 0.0080156  | 7.656   |
| NA | darkmagenta   | 276.44679 | 5.101085  | -0.790765 | 0.11121504 | 8.144   |
| NA | purple        | 286.48421 | 79.792649 | 0.999068  | 3.42E-05   | 54.07   |
| NA | pink          | 815.60818 | 135.95137 | 0.9803181 | 0.00330482 | 10.864  |
| NA | grey60        | 267.82806 | 57.704483 | 0.9609242 | 0.00921792 | 55.208  |
| NA | blue          | 384.5387  | 74.787178 | 0.8412025 | 0.07412667 | 16.25   |
| NA | lightgreen    | 240.1735  | 27.217804 | 0.7836587 | 0.11679435 | 6.154   |
| NA | black         | 835.81908 | 108.18616 | 0.9981739 | 9.37E-05   | 3.398   |
| NA | blue          | 593.76879 | 94.290489 | 0.8890317 | 0.04362825 | 122.164 |
| NA | greenyellow   | 183.53656 | 27.059908 | 0.8083516 | 0.09776766 | 93.678  |
| NA | brown         | 702.10031 | 135.28045 | 0.9986694 | 5.83E-05   | 9.786   |
| NA | tan           | 126.03538 | 41.130341 | 0.9495914 | 0.01348279 | 9.262   |
| NA | lightgreen    | 481.12727 | 35.420494 | 0.8759268 | 0.05147526 | 1.6     |

|    |               |           |           |           |            |          |
|----|---------------|-----------|-----------|-----------|------------|----------|
| NA | violet        | 954.57338 | 45.879023 | 0.9747481 | 0.00479871 | 2.91     |
| NA | yellow        | 226.61981 | 69.970509 | 0.8425312 | 0.07321365 | 59.888   |
| NA | red           | 632.07488 | 95.599819 | 0.9411733 | 0.01697564 | 7.014    |
| NA | red           | 918.06453 | 127.13013 | 0.9983331 | 8.17E-05   | 5.78     |
| NA | blue          | 925.31655 | 149.36801 | 0.9935228 | 0.00062517 | 2.884    |
| NA | darkred       | 193.11641 | 45.083858 | 0.9822869 | 0.0028224  | 13.038   |
| NA | blue          | 567.52854 | 118.81708 | 0.9445278 | 0.0155525  | 13.188   |
| NA | darkorange    | 106.71612 | 20.839483 | 0.8439942 | 0.07221242 | 38.668   |
| NA | paleturquoise | 176.71667 | 25.233141 | 0.9659448 | 0.00750546 | 4.058    |
| NA | midnightblue  | 841.49345 | 77.672885 | 0.9964414 | 0.0002547  | 13.906   |
| NA | grey60        | 309.13087 | 64.670074 | 0.9848243 | 0.00223907 | 60.632   |
| NA | grey60        | 294.20114 | 65.753252 | 0.9888441 | 0.0014121  | 54.24    |
| NA | brown         | 81.36692  | 7.2756325 | 0.1224794 | 0.84444517 | 10.648   |
| NA | greenyellow   | 176.27386 | 36.180399 | 0.9436521 | 0.01592009 | 15.172   |
| NA | greenyellow   | 203.44374 | 37.64239  | 0.9325846 | 0.02079849 | 46.686   |
| NA | violet        | 856.61238 | 46.538813 | 0.9965079 | 0.00024759 | 1.464    |
| NA | salmon        | 223.08638 | 68.972158 | 0.9734953 | 0.00515921 | 62.25    |
| NA | red           | 824.62724 | 120.82346 | 0.9883262 | 0.00151144 | 4.478    |
| NA | pink          | 935.54945 | 148.30349 | 0.9977181 | 0.0001308  | 52.302   |
| NA | darkgreen     | 188.14979 | 27.615092 | 0.8791806 | 0.04948886 | 28.388   |
| NA | turquoise     | 994.41634 | 196.36589 | 0.906837  | 0.03365387 | 17.528   |
| NA | red           | 894.62975 | 127.58416 | 0.9992509 | 2.46E-05   | 1.668    |
| NA | darkgreen     | 268.48355 | 40.868459 | 0.9832073 | 0.00260567 | 128.134  |
| NA | blue          | 549.70488 | 105.55331 | 0.9169082 | 0.02839113 | 4063.742 |
| NA | green         | 903.27406 | 115.79258 | 0.996767  | 0.00022056 | 5.64     |
| NA | paleturquoise | 179.21049 | 24.748644 | 0.9654419 | 0.00767176 | 7.312    |
| NA | turquoise     | 376.09511 | 59.178834 | 0.0320218 | 0.9592356  | 14.654   |
| NA | tan           | 162.67189 | 38.205593 | 0.9352657 | 0.01957823 | 49.43    |
| NA | brown         | 608.29229 | 128.20656 | 0.9896658 | 0.00125914 | 55.336   |
| NA | magenta       | 317.48428 | 86.056201 | 0.9978989 | 0.00011558 | 15.24    |
| NA | brown         | 509.0349  | 107.76199 | 0.9512695 | 0.01281842 | 10.63    |
| NA | paleturquoise | 179.50662 | 28.051103 | 0.9963797 | 0.00026135 | 27.522   |
| NA | green         | 940.37491 | 111.26837 | 0.9861349 | 0.00195574 | 16.374   |
| NA | darkturquoise | 266.04167 | 33.207441 | 0.9135767 | 0.03010012 | 8.038    |
| NA | purple        | 215.01103 | 52.99851  | 0.9037055 | 0.03534772 | 29.486   |
| NA | darkred       | 202.46599 | 45.690679 | 0.9875371 | 0.00166705 | 24.554   |
| NA | brown         | 449.25343 | 91.838873 | 0.909159  | 0.03241518 | 25.55    |
| NA | purple        | 230.20985 | 64.795917 | 0.9513265 | 0.01279606 | 1781.64  |
| NA | brown         | 511.55678 | 107.17688 | 0.9459394 | 0.01496587 | 26.208   |
| NA | midnightblue  | 714.60482 | 70.350009 | 0.9757419 | 0.00451889 | 1.266    |
| NA | royalblue     | 774.84676 | 60.560218 | 0.9853131 | 0.00213191 | 5.708    |
| NA | yellow        | 285.13219 | 132.16491 | 0.995312  | 0.00038505 | 15.582   |
| NA | green         | 870.15893 | 115.22654 | 0.996977  | 0.00019944 | 17.374   |
| NA | white         | 999.38734 | 39.470029 | 0.9821979 | 0.00284366 | 11.544   |
| NA | greenyellow   | 120.13188 | 20.985183 | 0.8204012 | 0.08886461 | 62.89    |
| NA | blue          | 587.27493 | 85.903768 | 0.870695  | 0.05472032 | 30.95    |
| NA | white         | 965.3902  | 47.070545 | 0.9898017 | 0.00123441 | 5.528    |
| NA | red           | 926.13641 | 126.19481 | 0.9968524 | 0.00021189 | 4.082    |

|    |               |           |           |           |            |         |
|----|---------------|-----------|-----------|-----------|------------|---------|
| NA | magenta       | 273.39982 | 83.912165 | 0.9934017 | 0.00064277 | 15.848  |
| NA | magenta       | 390.42949 | 76.057141 | 0.9657993 | 0.00755345 | 7.274   |
| NA | darkgreen     | 122.11823 | 17.402649 | 0.7452958 | 0.14827123 | 13.99   |
| NA | lightgreen    | 343.44456 | 37.65756  | 0.9297578 | 0.02211064 | 51.804  |
| NA | brown         | 784.08839 | 123.96262 | 0.9686495 | 0.00663206 | 7.338   |
| NA | turquoise     | 848.98349 | 202.52133 | 0.9333751 | 0.02043622 | 3.138   |
| NA | turquoise     | 547.08882 | 58.31449  | 0.3060211 | 0.61653184 | 4.276   |
| NA | yellow        | 244.97512 | 100.11021 | 0.9281143 | 0.02288541 | 16.132  |
| NA | royalblue     | 433.54544 | 54.599329 | 0.9623398 | 0.00872346 | 6.778   |
| NA | turquoise     | 218.89256 | 82.130809 | 0.6742209 | 0.21196567 | 5.032   |
| NA | turquoise     | 357.27677 | 53.427905 | 0.0430038 | 0.9452627  | 2.21    |
| NA | red           | 830.50899 | 122.70696 | 0.9913727 | 0.0009607  | 12      |
| NA | lightyellow   | 344.76281 | 54.206922 | 0.9627354 | 0.00858689 | 2.944   |
| NA | turquoise     | 608.36236 | 152.58861 | 0.8443571 | 0.07196467 | 2.962   |
| NA | lightgreen    | 227.84292 | 27.471195 | 0.7876874 | 0.11362104 | 4.882   |
| NA | pink          | 920.92757 | 148.82378 | 0.9984916 | 7.03E-05   | 2.898   |
| NA | white         | 248.16822 | 17.051746 | -0.629188 | 0.25544392 | 114.796 |
| NA | red           | 854.43061 | 125.46074 | 0.9958826 | 0.00031695 | 4.39    |
| NA | pink          | 952.93167 | 147.17569 | 0.9960802 | 0.00029442 | 11.766  |
| NA | pink          | 931.50851 | 148.88256 | 0.9985359 | 6.72E-05   | 17.44   |
| NA | blue          | 493.83597 | 106.855   | 0.9227642 | 0.02546628 | 6.634   |
| NA | darkgrey      | 919.80096 | 48.564704 | 0.9750154 | 0.00472289 | 143.694 |
| NA | pink          | 847.89892 | 147.69553 | 0.9971073 | 0.00018668 | 5.272   |
| NA | violet        | 923.64711 | 46.82666  | 0.9861197 | 0.00195895 | 2.878   |
| NA | white         | 272.60523 | 17.112746 | -0.631549 | 0.25311013 | 20.752  |
| NA | navy          | 900.1079  | 19.180737 | 0.0995576 | 0.8734491  | 4.156   |
| NA | red           | 910.76223 | 124.33722 | 0.9936804 | 0.0006025  | 4.284   |
| NA | violet        | 920.27497 | 47.035738 | 0.9897094 | 0.00125119 | 10.262  |
| NA | darkturquoise | 100.41519 | 8.7870684 | 0.6281714 | 0.25645023 | 22.236  |
| NA | brown         | 751.78263 | 134.54855 | 0.9953054 | 0.00038586 | 1.296   |
| NA | turquoise     | 551.51748 | 171.88429 | 0.9271978 | 0.02332115 | 31.774  |
| NA | navy          | 56.553169 | 17.905553 | 0.7681575 | 0.12924442 | 158.896 |
| NA | violet        | 55.98216  | 6.9224373 | -0.913231 | 0.03027949 | 11.116  |
| NA | red           | 694.03523 | 108.23619 | 0.9658153 | 0.00754818 | 3.604   |
| NA | violet        | 820.15906 | 44.919288 | 0.9900272 | 0.00119374 | 9.192   |
| NA | lightyellow   | 449.30568 | 62.905512 | 0.9944669 | 0.00049365 | 36.128  |
| NA | red           | 887.63265 | 126.7277  | 0.9979082 | 0.00011481 | 2.998   |
| NA | pink          | 894.62975 | 149.62591 | 0.9996875 | 6.63E-06   | 1.604   |
| NA | pink          | 893.13252 | 149.63556 | 0.9997119 | 5.87E-06   | 22.29   |
| NA | brown         | 403.63363 | 71.584904 | 0.8591616 | 0.06208991 | 78.162  |
| NA | red           | 907.4193  | 126.70647 | 0.9977028 | 0.00013213 | 5.376   |
| NA | red           | 898.47308 | 123.82367 | 0.9930188 | 0.00069948 | 1.854   |
| NA | white         | 930.25147 | 47.427691 | 0.9814208 | 0.00303153 | 17.78   |
| NA | pink          | 936.72945 | 149.0119  | 0.9987016 | 5.62E-05   | 88.628  |
| NA | violet        | 767.06956 | 43.242158 | 0.9928072 | 0.0007315  | 2.508   |
| NA | darkorange    | 194.04048 | 23.294011 | 0.8880723 | 0.04418867 | 10.708  |
| NA | darkgreen     | 142.81333 | 17.146294 | 0.7329825 | 0.15883074 | 32.234  |
| NA | salmon        | 220.14941 | 75.086978 | 0.9920884 | 0.00084375 | 9.996   |

|    |              |           |           |           |            |         |
|----|--------------|-----------|-----------|-----------|------------|---------|
| NA | green        | 708.04687 | 99.88509  | 0.9660351 | 0.00747573 | 33.678  |
| NA | yellow       | 309.57859 | 129.09306 | 0.9881533 | 0.0015451  | 18.932  |
| NA | yellow       | 218.65691 | 99.707947 | 0.9324243 | 0.0208722  | 14.254  |
| NA | navy         | 925.35654 | 19.201661 | -0.024925 | 0.96826826 | 14.18   |
| NA | orange       | 93.748733 | 21.589274 | 0.8138004 | 0.09370962 | 945.186 |
| NA | lightyellow  | 428.99042 | 59.425556 | 0.982312  | 0.00281641 | 169.246 |
| NA | red          | 883.66829 | 126.09424 | 0.996891  | 0.000208   | 2.484   |
| NA | red          | 896.47829 | 126.92136 | 0.9980977 | 9.96E-05   | 9.07    |
| NA | darkgrey     | 972.97383 | 52.050247 | 0.9887638 | 0.00142734 | 6.38    |
| NA | white        | 820.04062 | 44.260468 | 0.9594205 | 0.00975286 | 7.292   |
| NA | salmon       | 220.07039 | 76.758292 | 0.996812  | 0.00021598 | 1.438   |
| NA | skyblue      | 421.3587  | 42.616749 | 0.9903973 | 0.00112798 | 6.698   |
| NA | blue         | 957.93826 | 138.20645 | 0.9747424 | 0.00480032 | 22.134  |
| NA | greenyellow  | 100.57591 | 15.001332 | 0.704001  | 0.1844924  | 17.216  |
| NA | magenta      | 174.655   | 61.038145 | 0.9205137 | 0.02657821 | 1.286   |
| NA | turquoise    | 481.53771 | 157.42327 | 0.9043072 | 0.03502019 | 10.34   |
| NA | green        | 659.13795 | 102.34997 | 0.9713885 | 0.0057846  | 2.29    |
| NA | pink         | 901.63362 | 149.45743 | 0.9994345 | 1.61E-05   | 5.644   |
| NA | red          | 864.12154 | 126.37022 | 0.9973916 | 0.00015986 | 91.158  |
| NA | pink         | 894.62975 | 149.62591 | 0.9996875 | 6.63E-06   | 1.604   |
| NA | violet       | 761.49259 | 43.583285 | 0.9972912 | 0.00016917 | 9.682   |
| NA | darkgrey     | 1019.3023 | 48.797429 | 0.9742262 | 0.00494783 | 9.17    |
| NA | salmon       | 227.30199 | 70.78213  | 0.9792279 | 0.0035826  | 20.71   |
| NA | white        | 946.87234 | 47.332975 | 0.9863398 | 0.00191262 | 109.294 |
| NA | navy         | 885.08609 | 19.077057 | -0.051533 | 0.93441577 | 2.55    |
| NA | turquoise    | 893.81652 | 221.94815 | 0.9786876 | 0.00372296 | 4.464   |
| NA | grey60       | 312.4841  | 67.593958 | 0.9940828 | 0.00054591 | 16.74   |
| NA | red          | 821.89563 | 122.19143 | 0.9906044 | 0.00109172 | 2.718   |
| NA | greenyellow  | 215.45433 | 35.529882 | 0.9785879 | 0.00374906 | 44.114  |
| NA | darkorange   | 118.97893 | 26.941915 | 0.9195838 | 0.02704209 | 8.864   |
| NA | white        | 968.91131 | 41.946883 | 0.9758996 | 0.00447501 | 12.08   |
| NA | darkgrey     | 896.30265 | 50.415795 | 0.9831256 | 0.00262466 | 7.804   |
| NA | tan          | 77.398885 | 20.314467 | 0.7009717 | 0.18723747 | 51.822  |
| NA | turquoise    | 245.58554 | 85.710669 | 0.6736369 | 0.21251503 | 23.188  |
| NA | orange       | 339.13224 | 21.116941 | 0.8232797 | 0.08677656 | 31.862  |
| NA | darkgrey     | 851.82461 | 49.421129 | 0.9793862 | 0.0035418  | 4.822   |
| NA | pink         | 925.31556 | 148.58008 | 0.9981493 | 9.55E-05   | 3.646   |
| NA | white        | 909.34792 | 47.251474 | 0.9762923 | 0.00436633 | 14.064  |
| NA | white        | 978.54476 | 46.593548 | 0.990087  | 0.00118303 | 2.904   |
| NA | tan          | 157.05228 | 38.659186 | 0.9325513 | 0.02081377 | 10.368  |
| NA | midnightblue | 840.81798 | 72.238333 | 0.9809136 | 0.00315625 | 11.038  |
| NA | greenyellow  | 117.0297  | 7.226886  | 0.3759454 | 0.53285894 | 26.566  |
| NA | turquoise    | 249.67242 | 90.464272 | 0.7091018 | 0.17989651 | 4.736   |
| NA | pink         | 924.99809 | 148.49586 | 0.9980195 | 0.00010577 | 4.96    |
| NA | red          | 904.56782 | 124.8292  | 0.994564  | 0.00048073 | 21.452  |
| NA | darkred      | 129.08954 | 16.666057 | 0.6981958 | 0.18976298 | 41.21   |
| NA | salmon       | 231.01987 | 74.542994 | 0.989915  | 0.00121392 | 4.072   |
| NA | salmon       | 217.23128 | 72.359451 | 0.983438  | 0.00255225 | 36.902  |

|    |               |           |           |           |            |        |
|----|---------------|-----------|-----------|-----------|------------|--------|
| NA | red           | 891.86133 | 127.11867 | 0.9985299 | 6.76E-05   | 13.744 |
| NA | white         | 881.45287 | 46.965672 | 0.9701858 | 0.00615201 | 12.388 |
| NA | red           | 893.75392 | 127.04235 | 0.9983214 | 8.25E-05   | 2.43   |
| NA | purple        | 307.92752 | 74.726227 | 0.9823047 | 0.00281814 | 7.252  |
| NA | darkgreen     | 255.53793 | 40.381424 | 0.9764787 | 0.00431506 | 21.732 |
| NA | turquoise     | 1019.1965 | 219.45189 | 0.9500487 | 0.01330066 | 1.424  |
| NA | purple        | 248.36007 | 59.424596 | 0.9302404 | 0.02188479 | 6.106  |
| NA | red           | 900.90829 | 125.25432 | 0.9953975 | 0.00037457 | 2.304  |
| NA | pink          | 938.82636 | 146.68924 | 0.9954264 | 0.00037104 | 1.614  |
| NA | darkred       | 196.3803  | 44.600889 | 0.9768424 | 0.00421562 | 7.95   |
| NA | pink          | 932.70744 | 149.20199 | 0.9989862 | 3.87E-05   | 5.738  |
| NA | pink          | 887.34141 | 140.85007 | 0.9873252 | 0.00170968 | 7.674  |
| NA | darkorange    | 173.65034 | 29.40698  | 0.9530288 | 0.01213382 | 13.732 |
| NA | turquoise     | 992.49952 | 222.40725 | 0.9617557 | 0.0089264  | 7.082  |
| NA | red           | 872.48026 | 126.10953 | 0.9969642 | 0.0002007  | 6.71   |
| NA | pink          | 601.56736 | 116.48209 | 0.9487617 | 0.0138153  | 9.964  |
| NA | skyblue       | 329.39724 | 34.818877 | 0.9478862 | 0.01416896 | 5.014  |
| NA | lightyellow   | 440.42938 | 62.242565 | 0.9919541 | 0.0008653  | 8.918  |
| NA | pink          | 947.07705 | 147.75757 | 0.996896  | 0.00020749 | 23.78  |
| NA | greenyellow   | 120.61072 | 26.170053 | 0.8416564 | 0.07381434 | 62.456 |
| NA | turquoise     | 476.68466 | 141.90548 | 0.8616804 | 0.06045566 | 1.942  |
| NA | lightyellow   | 654.20575 | 54.278459 | 0.9587597 | 0.00999105 | 1.906  |
| NA | green         | 963.79466 | 105.47241 | 0.9727746 | 0.00537049 | 4.116  |
| NA | lightyellow   | 294.43903 | 52.611093 | 0.9535858 | 0.01191964 | 54.518 |
| NA | lightyellow   | 492.98782 | 61.853944 | 0.9901393 | 0.00117368 | 8.852  |
| NA | black         | 865.154   | 96.864412 | 0.974206  | 0.00495363 | 23.946 |
| NA | pink          | 858.81047 | 147.49    | 0.9968129 | 0.00021589 | 1.528  |
| NA | turquoise     | 804.77155 | 196.53365 | 0.9321083 | 0.02101776 | 24.844 |
| NA | magenta       | 200.29539 | 65.838336 | 0.9382754 | 0.01823722 | 45.068 |
| NA | skyblue       | 644.28079 | 38.782611 | 0.9664536 | 0.00733845 | 4.712  |
| NA | darkmagenta   | 75.659263 | 8.3814492 | 0.9745445 | 0.0048567  | 36.676 |
| NA | turquoise     | 232.93739 | 93.608564 | 0.6823332 | 0.20437604 | 6.75   |
| NA | paleturquoise | 159.10879 | 21.444261 | 0.9239282 | 0.02489719 | 7.934  |
| NA | green         | 462.73704 | 77.168971 | 0.9075528 | 0.03327046 | 4.102  |
| NA | tan           | 103.28683 | 30.350976 | 0.8312876 | 0.08104882 | 6.102  |
| NA | salmon        | 192.34758 | 69.544475 | 0.9764235 | 0.00433022 | 2.558  |
| NA | red           | 948.99039 | 124.03892 | 0.992948  | 0.00071013 | 2.458  |
| NA | green         | 927.76401 | 109.60654 | 0.9820389 | 0.00288177 | 19.498 |
| NA | skyblue       | 468.12598 | 43.575738 | 0.995409  | 0.00037316 | 10.512 |
| NA | navy          | 65.435955 | 30.909452 | 0.8910255 | 0.04247093 | 2.426  |
| NA | yellow        | 243.04428 | 105.4319  | 0.9416066 | 0.01678954 | 71.006 |
| NA | greenyellow   | 191.85181 | 39.34881  | 0.9746716 | 0.00482047 | 54.36  |
| NA | turquoise     | 1006.5838 | 196.86198 | 0.9084407 | 0.03279677 | 11.294 |
| NA | turquoise     | 724.73348 | 178.64122 | 0.9033541 | 0.03553944 | 48.366 |
| NA | royalblue     | 649.01002 | 62.204503 | 0.9927793 | 0.00073575 | 13.446 |
| NA | blue          | 849.89253 | 135.95645 | 0.9728485 | 0.00534868 | 2.154  |
| NA | turquoise     | 878.80999 | 210.28151 | 0.9541499 | 0.011704   | 4.31   |
| NA | lightyellow   | 733.55852 | 46.174223 | 0.9217625 | 0.02595931 | 16.854 |



|    |               |           |           |           |            |          |
|----|---------------|-----------|-----------|-----------|------------|----------|
| NA | grey60        | 315.13567 | 68.030583 | 0.9957497 | 0.00033242 | 23.316   |
| NA | turquoise     | 126.90573 | 42.939322 | 0.517943  | 0.37133746 | 9.376    |
| NA | violet        | 48.032032 | 6.5827922 | -0.848577 | 0.06910383 | 135.298  |
| NA | turquoise     | 748.96387 | 202.64131 | 0.9546733 | 0.01150509 | 20.256   |
| NA | blue          | 803.25747 | 150.52713 | 0.9966618 | 0.00023141 | 248.594  |
| NA | white         | 777.11628 | 43.457853 | 0.9385549 | 0.01811429 | 55.664   |
| NA | purple        | 300.61647 | 76.231509 | 0.9864842 | 0.00188241 | 5564.096 |
| NA | red           | 962.68352 | 120.57294 | 0.987066  | 0.00176233 | 7.658    |
| NA | red           | 928.58718 | 126.90616 | 0.9979097 | 0.00011469 | 2.192    |
| NA | darkgrey      | 1010.4448 | 50.131992 | 0.9801024 | 0.00335919 | 7.292    |
| NA | green         | 555.5389  | 90.998581 | 0.9446799 | 0.01548891 | 15.186   |
| NA | midnightblue  | 906.91414 | 78.518261 | 0.9985761 | 6.45E-05   | 8.258    |
| NA | blue          | 774.25186 | 150.28862 | 0.9967363 | 0.00022371 | 1.054    |
| NA | black         | 723.13359 | 104.77168 | 0.9917342 | 0.000901   | 1.314    |
| NA | turquoise     | 187.66109 | 68.655504 | 0.5296572 | 0.35863241 | 6.866    |
| NA | salmon        | 238.76728 | 74.824833 | 0.9904648 | 0.00111161 | 15.874   |
| NA | green         | 420.5468  | 61.370134 | 0.859458  | 0.06189688 | 34.642   |
| NA | turquoise     | 288.72614 | 59.292776 | -0.153998 | 0.80470126 | 6.834    |
| NA | midnightblue  | 930.31718 | 78.16033  | 0.997555  | 0.00014508 | 84.47    |
| NA | turquoise     | 841.60799 | 217.99947 | 0.9735283 | 0.00514962 | 50.454   |
| NA | magenta       | 242.48969 | 66.210196 | 0.9418521 | 0.01668437 | 5.22     |
| NA | blue          | 710.03683 | 124.75583 | 0.954724  | 0.0114859  | 77.784   |
| NA | green         | 891.04481 | 111.2913  | 0.9864632 | 0.00188678 | 9.85     |
| NA | magenta       | 288.42251 | 86.078526 | 0.9988542 | 4.65E-05   | 6.77     |
| NA | midnightblue  | 854.33552 | 62.704055 | 0.951212  | 0.01284103 | 10.446   |
| NA | darkturquoise | 110.02695 | 12.236331 | 0.6936649 | 0.19390564 | 93.812   |
| NA | lightgreen    | 482.24329 | 35.363906 | 0.8752885 | 0.05186779 | 2.466    |
| NA | lightyellow   | 562.46942 | 59.000694 | 0.9785901 | 0.00374848 | 20.372   |
| NA | yellow        | 244.6839  | 114.89404 | 0.9633704 | 0.00836916 | 15.048   |
| NA | orange        | 191.86713 | 35.666807 | 0.9729914 | 0.00530665 | 0.138    |
| NA | pink          | 906.47851 | 149.81623 | 0.9999213 | 8.38E-07   | 8.908    |
| NA | black         | 771.43826 | 98.933758 | 0.9799159 | 0.00340644 | 5.19     |
| NA | pink          | 894.97665 | 145.04011 | 0.9933798 | 0.00064597 | 1.598    |
| NA | white         | 874.46912 | 46.853802 | 0.967791  | 0.00690544 | 2.362    |
| NA | red           | 945.70932 | 124.77927 | 0.9942261 | 0.00052622 | 2.002    |
| NA | darkgreen     | 79.656867 | 15.374273 | 0.6868584 | 0.20017623 | 22.504   |
| NA | green         | 881.57829 | 109.37489 | 0.9822442 | 0.00283259 | 6.004    |
| NA | brown         | 365.00108 | 69.091621 | 0.85218   | 0.06669019 | 16.084   |
| NA | turquoise     | 671.49832 | 159.55824 | 0.8801355 | 0.0489106  | 12.488   |
| NA | magenta       | 137.93907 | 49.908063 | 0.8799184 | 0.04904187 | 20.26    |
| NA | royalblue     | 789.63978 | 56.206146 | 0.9678763 | 0.00687811 | 8.28     |
| NA | navy          | 81.79352  | 21.84905  | 0.8650212 | 0.0583093  | 5.312    |
| NA | darkgrey      | 807.1015  | 49.288218 | 0.9784257 | 0.00379165 | 3.276    |
| NA | darkturquoise | 177.76087 | 44.924643 | 0.9863085 | 0.00191918 | 77.44    |
| NA | turquoise     | 290.03727 | 107.64913 | 0.7677678 | 0.12956219 | 5.808    |
| NA | pink          | 919.26378 | 149.69822 | 0.9997261 | 5.44E-06   | 14.578   |
| NA | darkgrey      | 896.01391 | 52.854806 | 0.9927943 | 0.00073347 | 3.194    |
| NA | green         | 975.58626 | 101.44134 | 0.9637978 | 0.00822364 | 38.302   |

|    |              |           |           |           |            |         |
|----|--------------|-----------|-----------|-----------|------------|---------|
| NA | magenta      | 168.36889 | 67.374907 | 0.939643  | 0.01763818 | 59.888  |
| NA | midnightblue | 881.44427 | 77.525242 | 0.9959326 | 0.00031121 | 10.198  |
| NA | orange       | 201.43589 | 34.616505 | 0.9763096 | 0.00436158 | 16.91   |
| NA | navy         | 163.76366 | 28.452984 | 0.926249  | 0.0237751  | 6.61    |
| NA | navy         | 64.033081 | 22.29852  | 0.7728977 | 0.12539747 | 2.41    |
| NA | violet       | 42.048406 | 5.2373587 | -0.737568 | 0.15487374 | 207.372 |
| NA | turquoise    | 162.49753 | 37.077627 | -0.497181 | 0.39411343 | 7.61    |
| NA | lightcyan    | 279.4729  | 42.009512 | 0.9202677 | 0.02670063 | 14.164  |
| NA | violet       | 907.85743 | 46.743534 | 0.9902659 | 0.00115117 | 2.882   |
| NA | darkgreen    | 167.13868 | 32.160752 | 0.9083526 | 0.03284367 | 4.812   |
| NA | salmon       | 239.78498 | 68.198552 | 0.9702396 | 0.00613541 | 30.376  |
| NA | white        | 904.46156 | 47.043623 | 0.9773629 | 0.00407459 | 11.89   |
| NA | yellow       | 213.99621 | 97.493064 | 0.9230685 | 0.02531708 | 19.1    |
| NA | red          | 488.76196 | 79.139854 | 0.9038821 | 0.03525151 | 23.314  |
| NA | tan          | 82.952049 | 14.956011 | 0.6609774 | 0.22451961 | 1.566   |
| NA | tan          | 145.68842 | 39.683952 | 0.9353413 | 0.01954414 | 8.148   |
| NA | darkgrey     | 924.54371 | 51.698078 | 0.9882559 | 0.00152509 | 3.406   |
| NA | magenta      | 184.04395 | 62.8977   | 0.9274855 | 0.02318408 | 317.736 |
| NA | lightcyan    | 597.73808 | 51.876661 | 0.9451505 | 0.0152928  | 13.382  |
| NA | red          | 927.30232 | 126.22576 | 0.9968445 | 0.00021268 | 3.946   |
| NA | skyblue      | 314.09912 | 34.854221 | 0.9444603 | 0.01558072 | 11.978  |
| NA | lightyellow  | 414.17632 | 62.944837 | 0.9950088 | 0.00042298 | 9.028   |
| NA | turquoise    | 479.85704 | 141.21399 | 0.8284414 | 0.08307079 | 8.22    |
| NA | lightgreen   | 566.90684 | 37.445957 | 0.9317195 | 0.0211973  | 6.166   |
| NA | lightcyan    | 474.86805 | 58.929251 | 0.9880669 | 0.00156202 | 58.654  |
| NA | orange       | 367.85662 | 32.187872 | 0.9598279 | 0.00960697 | 6.814   |
| NA | red          | 763.09945 | 116.25359 | 0.9802857 | 0.00331296 | 2.64    |
| NA | magenta      | 197.86228 | 56.522227 | 0.9112902 | 0.03129152 | 6.606   |
| NA | brown        | 914.16449 | 105.12901 | 0.9304686 | 0.02177824 | 18.444  |
| NA | white        | 956.49765 | 47.42007  | 0.9871417 | 0.00174691 | 6.274   |
| NA | grey60       | 295.1945  | 60.961512 | 0.971883  | 0.00563569 | 40.804  |
| NA | pink         | 894.62975 | 149.62591 | 0.9996875 | 6.63E-06   | 1.668   |
| NA | skyblue      | 407.3083  | 40.527168 | 0.9802818 | 0.00331394 | 8.862   |
| NA | skyblue      | 262.9467  | 28.91035  | 0.9026613 | 0.03591842 | 82.858  |
| NA | violet       | 872.9933  | 46.914952 | 0.996199  | 0.00028114 | 2.234   |
| NA | purple       | 252.29834 | 59.044346 | 0.9297527 | 0.02211304 | 17.926  |
| NA | darkgreen    | 184.68507 | 34.565544 | 0.9290758 | 0.02243107 | 143.366 |
| NA | red          | 879.02141 | 125.73441 | 0.9963087 | 0.00026907 | 4.202   |
| NA | yellow       | 312.04684 | 124.15569 | 0.9813429 | 0.00305057 | 11.194  |
| NA | magenta      | 256.15843 | 77.341852 | 0.9754933 | 0.00458838 | 128.41  |
| NA | salmon       | 214.31108 | 75.780852 | 0.9941264 | 0.0005399  | 21.34   |
| NA | purple       | 239.32818 | 68.706759 | 0.9663074 | 0.00738631 | 27.248  |
| NA | blue         | 635.33834 | 103.68785 | 0.9120355 | 0.03090154 | 116.238 |
| NA | pink         | 760.51495 | 137.27875 | 0.9821554 | 0.00285383 | 3.87    |
| NA | grey60       | 312.84082 | 67.380217 | 0.9933802 | 0.00064591 | 12.136  |
| NA | purple       | 251.45793 | 66.176154 | 0.9584887 | 0.01008929 | 13.638  |
| NA | pink         | 894.62975 | 149.62591 | 0.9996875 | 6.63E-06   | 1.476   |
| NA | violet       | 875.6729  | 46.878497 | 0.9965541 | 0.0002427  | 6.074   |

|    |              |           |           |           |            |         |
|----|--------------|-----------|-----------|-----------|------------|---------|
| NA | red          | 923.51728 | 126.94426 | 0.9979985 | 0.00010746 | 5.948   |
| NA | red          | 823.65106 | 120.00775 | 0.9868408 | 0.00180851 | 3.838   |
| NA | pink         | 940.92135 | 148.78547 | 0.9983712 | 7.89E-05   | 13.004  |
| NA | purple       | 292.52214 | 74.456029 | 0.9822044 | 0.0028421  | 188.322 |
| NA | purple       | 297.62453 | 78.23107  | 0.992864  | 0.00072285 | 8.46    |
| NA | grey         | 370.21007 | 14.786319 | 0.9843391 | 0.00234712 | 15.734  |
| NA | tan          | 297.77796 | 34.488274 | 0.872576  | 0.05354644 | 40.194  |
| NA | red          | 882.95563 | 125.97811 | 0.9967038 | 0.00022706 | 2.42    |
| NA | red          | 901.29773 | 125.6264  | 0.9960129 | 0.00030204 | 2.496   |
| NA | orange       | 97.224104 | 14.207022 | 0.7480443 | 0.1459434  | 15.022  |
| NA | salmon       | 220.07039 | 76.758292 | 0.996812  | 0.00021598 | 1.492   |
| NA | purple       | 297.25222 | 78.978198 | 0.9954541 | 0.00036767 | 25.656  |
| NA | darkgreen    | 242.81174 | 43.382657 | 0.9969414 | 0.00020296 | 13.35   |
| NA | violet       | 43.091144 | 9.5191844 | -0.989812 | 0.00123261 | 56.93   |
| NA | green        | 837.56195 | 115.76443 | 0.9982643 | 8.68E-05   | 12.534  |
| NA | brown        | 456.70929 | 93.655182 | 0.9210623 | 0.02630572 | 22.168  |
| NA | blue         | 965.43968 | 144.49948 | 0.984873  | 0.00222831 | 3.258   |
| NA | green        | 906.65673 | 112.33859 | 0.9884088 | 0.00149545 | 13.234  |
| NA | tan          | 134.40146 | 39.582384 | 0.9418338 | 0.01669221 | 26.542  |
| NA | white        | 262.10493 | 15.523331 | -0.686759 | 0.20026816 | 20.112  |
| NA | royalblue    | 565.4824  | 61.336115 | 0.9897138 | 0.00125039 | 9.338   |
| NA | turquoise    | 812.4552  | 207.93588 | 0.9633117 | 0.00838919 | 1.444   |
| NA | black        | 610.21532 | 92.022854 | 0.964506  | 0.00798436 | 9.19    |
| NA | yellow       | 227.39911 | 105.46134 | 0.9448779 | 0.0154063  | 11.536  |
| NA | red          | 1003.8475 | 115.06592 | 0.976826  | 0.00422007 | 6.858   |
| NA | grey60       | 310.98971 | 68.437112 | 0.9969637 | 0.00020075 | 20.81   |
| NA | turquoise    | 306.40314 | 59.943548 | -0.104433 | 0.86727425 | 5.276   |
| NA | green        | 905.02013 | 110.17556 | 0.9835991 | 0.00251515 | 28.712  |
| NA | brown        | 489.98468 | 102.7989  | 0.9433302 | 0.01605591 | 36.346  |
| NA | royalblue    | 564.93333 | 57.557311 | 0.9770776 | 0.00415169 | 9.456   |
| NA | lightcyan    | 468.3286  | 58.935336 | 0.9890094 | 0.00138085 | 4.336   |
| NA | magenta      | 356.96053 | 74.974901 | 0.9648551 | 0.00786726 | 2.308   |
| NA | darkgrey     | 1001.9119 | 50.68619  | 0.9825679 | 0.00275563 | 21.4    |
| NA | turquoise    | 909.78666 | 221.29207 | 0.9660895 | 0.00745784 | 10.32   |
| NA | lightyellow  | 624.2223  | 58.289818 | 0.9760518 | 0.00443278 | 3.32    |
| NA | red          | 924.30271 | 126.63432 | 0.9975533 | 0.00014523 | 9.862   |
| NA | blue         | 941.39595 | 148.46593 | 0.991591  | 0.00092449 | 5.584   |
| NA | grey60       | 307.41653 | 66.889187 | 0.9919531 | 0.00086547 | 84.538  |
| NA | navy         | 842.75173 | 17.953253 | 0.0385861 | 0.95088278 | 6.934   |
| NA | lightyellow  | 703.37516 | 49.989801 | 0.9402702 | 0.01736562 | 34.484  |
| NA | violet       | 833.80033 | 45.832289 | 0.9944487 | 0.0004961  | 4.418   |
| NA | tan          | 161.90575 | 32.691321 | 0.8675619 | 0.05669334 | 49.954  |
| NA | red          | 609.83584 | 97.438444 | 0.9442675 | 0.01566147 | 7.042   |
| NA | darkgrey     | 860.83227 | 50.149917 | 0.9818819 | 0.00291956 | 4.182   |
| NA | brown        | 759.91707 | 124.02037 | 0.9689506 | 0.00653702 | 7.408   |
| NA | purple       | 228.80246 | 64.062878 | 0.9481013 | 0.01408182 | 87.934  |
| NA | midnightblue | 989.4866  | 75.196783 | 0.9891963 | 0.00134582 | 10.908  |
| NA | navy         | 899.0255  | 19.122883 | 0.1090879 | 0.86138094 | 1.918   |

|    |              |           |           |           |            |         |
|----|--------------|-----------|-----------|-----------|------------|---------|
| NA | red          | 941.82462 | 122.96712 | 0.9911668 | 0.00099526 | 3.16    |
| NA | turquoise    | 1011.7613 | 219.83711 | 0.9529517 | 0.01216357 | 17.132  |
| NA | tan          | 134.5823  | 34.406945 | 0.8985034 | 0.03821962 | 13.002  |
| NA | black        | 533.74306 | 82.775534 | 0.940928  | 0.01708129 | 9.834   |
| NA | yellow       | 278.54702 | 116.67485 | 0.9672089 | 0.00709284 | 8.408   |
| NA | magenta      | 262.0199  | 81.333868 | 0.9865889 | 0.00186061 | 3.772   |
| NA | darkred      | 151.7718  | 37.329724 | 0.9361297 | 0.01919009 | 28.864  |
| NA | green        | 383.9182  | 49.842836 | 0.8161615 | 0.09196757 | 48.102  |
| NA | turquoise    | 966.03333 | 198.53392 | 0.9140418 | 0.02985963 | 2.156   |
| NA | navy         | 356.80566 | 20.65141  | 0.8174086 | 0.09105143 | 170.824 |
| NA | magenta      | 467.35346 | 67.637735 | 0.9327673 | 0.02071457 | 28.814  |
| NA | turquoise    | 278.88877 | 56.653792 | -0.141017 | 0.82104857 | 41.872  |
| NA | midnightblue | 800.44246 | 75.876815 | 0.9915024 | 0.00093913 | 52.236  |
| NA | turquoise    | 561.97538 | 58.51523  | 0.3131442 | 0.607908   | 1.868   |
| NA | salmon       | 200.34522 | 66.919184 | 0.9675592 | 0.00697987 | 46.294  |
| NA | turquoise    | 912.94718 | 226.89616 | 0.9841947 | 0.00237961 | 3.782   |
| NA | green        | 459.49285 | 76.660633 | 0.9061509 | 0.03402271 | 3.592   |
| NA | pink         | 926.89683 | 148.31671 | 0.9977622 | 0.00012704 | 2.32    |
| NA | blue         | 838.21376 | 142.01455 | 0.9827017 | 0.00272401 | 5.902   |
| NA | lightcyan    | 691.98182 | 44.932331 | 0.8993904 | 0.03772486 | 9.178   |
| NA | blue         | 977.83946 | 140.14455 | 0.9774617 | 0.00404802 | 11.66   |
| NA | black        | 773.99751 | 107.30861 | 0.9967557 | 0.00022172 | 12.236  |
| NA | black        | 934.89608 | 100.3213  | 0.9814087 | 0.00303447 | 10.494  |
| NA | turquoise    | 434.83349 | 134.94477 | 0.8315927 | 0.08083293 | 3.854   |
| NA | turquoise    | 361.96894 | 61.121267 | -0.034087 | 0.9566074  | 13.438  |
| NA | turquoise    | 915.21294 | 199.20673 | 0.9297292 | 0.02212404 | 0.72    |
| NA | turquoise    | 261.21463 | 57.084552 | -0.223621 | 0.71766761 | 8.336   |
| NA | lightyellow  | 390.62857 | 62.48525  | 0.9928995 | 0.00071747 | 137.426 |
| NA | magenta      | 213.74331 | 78.136426 | 0.9759917 | 0.00444944 | 2.582   |
| NA | lightgreen   | 301.09245 | 33.567949 | 0.8908093 | 0.04259593 | 7.59    |
| NA | magenta      | 228.3112  | 77.400658 | 0.9746646 | 0.00482246 | 21.122  |
| NA | grey         | 497.22474 | 15.399421 | 0.9932069 | 0.00067142 | 7.612   |
| NA | magenta      | 227.6126  | 81.192243 | 0.985094  | 0.00217974 | 12.136  |
| NA | black        | 611.94874 | 89.994516 | 0.9593338 | 0.00978401 | 3.58    |
| NA | midnightblue | 934.17969 | 77.270923 | 0.9953208 | 0.00038396 | 1.66    |
| NA | royalblue    | 481.13334 | 57.168493 | 0.9733049 | 0.00521475 | 6.848   |
| NA | orange       | 327.84163 | 35.246024 | 0.9819531 | 0.00290241 | 4.516   |
| NA | royalblue    | 749.52685 | 60.496346 | 0.9848342 | 0.00223688 | 4.198   |
| NA | lightcyan    | 556.45092 | 53.602082 | 0.9571839 | 0.0105666  | 18.222  |
| NA | lightyellow  | 354.1048  | 55.985362 | 0.9685427 | 0.00666585 | 6.17    |
| NA | darkgreen    | 105.99915 | 21.479367 | 0.7857401 | 0.11515159 | 109.16  |
| NA | darkgrey     | 528.01864 | 33.149631 | 0.8962905 | 0.03946278 | 2.696   |
| NA | royalblue    | 650.79945 | 63.694772 | 0.9974315 | 0.00015621 | 12.11   |
| NA | white        | 273.13458 | 16.681582 | -0.557377 | 0.32900911 | 3.188   |
| NA | yellow       | 303.03486 | 117.19265 | 0.9662687 | 0.00739901 | 9.016   |
| NA | turquoise    | 735.63073 | 189.07344 | 0.9409682 | 0.01706394 | 38.34   |
| NA | turquoise    | 581.27795 | 58.097894 | 0.3353454 | 0.58116844 | 13.8    |
| NA | turquoise    | 973.47697 | 197.20097 | 0.9088871 | 0.03255946 | 13.356  |

|    |               |           |           |           |            |         |
|----|---------------|-----------|-----------|-----------|------------|---------|
| NA | navy          | 64.648586 | 9.012268  | 0.496525  | 0.39483835 | 7.82    |
| NA | brown         | 863.68919 | 119.31825 | 0.9634047 | 0.00835744 | 16.304  |
| NA | darkred       | 175.3161  | 40.778783 | 0.9584551 | 0.01010151 | 11.142  |
| NA | pink          | 668.55064 | 125.48744 | 0.9637702 | 0.00823302 | 2.966   |
| NA | turquoise     | 1015.1454 | 218.07594 | 0.9474656 | 0.01433995 | 13.076  |
| NA | pink          | 924.96131 | 149.26805 | 0.9991038 | 3.22E-05   | 27.704  |
| NA | navy          | 85.081516 | 35.239683 | 0.9146489 | 0.02954663 | 91.238  |
| NA | yellow        | 216.36047 | 100.72939 | 0.9317023 | 0.02120523 | 79.704  |
| NA | yellow        | 298.21749 | 122.62143 | 0.9783122 | 0.00382156 | 1144.25 |
| NA | orange        | 167.14358 | 24.913612 | 0.9105337 | 0.0316889  | 36.722  |
| NA | turquoise     | 901.70303 | 211.67236 | 0.9513776 | 0.01277602 | 16.744  |
| NA | turquoise     | 993.28854 | 218.67793 | 0.9523679 | 0.01238955 | 23.764  |
| NA | tan           | 152.90422 | 47.842223 | 0.9972242 | 0.00017548 | 14.86   |
| NA | red           | 843.63929 | 123.67426 | 0.9930373 | 0.0006967  | 1.952   |
| NA | navy          | 71.027515 | 18.308756 | 0.7203204 | 0.16990622 | 1.976   |
| NA | red           | 927.51955 | 126.28991 | 0.9968763 | 0.00020948 | 3.088   |
| NA | yellow        | 284.97166 | 127.32404 | 0.9867332 | 0.0018307  | 21.582  |
| NA | yellow        | 307.26268 | 122.71742 | 0.9760711 | 0.00442745 | 289.064 |
| NA | purple        | 262.95051 | 66.437202 | 0.9559245 | 0.01103412 | 16.632  |
| NA | yellow        | 259.89818 | 121.75938 | 0.9768124 | 0.00422377 | 10.302  |
| NA | paleturquoise | 163.1452  | 25.070426 | 0.9742356 | 0.00494514 | 6.334   |
| NA | midnightblue  | 724.74121 | 71.670187 | 0.9797636 | 0.00344518 | 6.724   |
| NA | tan           | 191.88662 | 44.157078 | 0.9728248 | 0.00535569 | 18.056  |
| NA | darkred       | 180.16217 | 38.144974 | 0.9424317 | 0.01643699 | 9.95    |
| NA | pink          | 911.58594 | 147.51768 | 0.9967785 | 0.00021939 | 4.748   |
| NA | yellow        | 228.95343 | 84.334366 | 0.8903253 | 0.04287627 | 9.948   |
| NA | purple        | 202.03866 | 46.60251  | 0.880033  | 0.04897254 | 32.198  |
| NA | darkgreen     | 241.03536 | 42.697063 | 0.990837  | 0.00105146 | 10.076  |
| NA | pink          | 894.62975 | 149.62591 | 0.9996875 | 6.63E-06   | 1.796   |
| NA | midnightblue  | 844.80172 | 76.676535 | 0.9938349 | 0.00058055 | 43.566  |
| NA | darkturquoise | 135.73169 | 11.151749 | 0.663426  | 0.22218342 | 63.024  |
| NA | orange        | 111.05115 | 23.698068 | 0.8605972 | 0.06115682 | 41.178  |
| NA | navy          | 79.028479 | 36.935502 | 0.9659193 | 0.00751388 | 9.8     |
| NA | purple        | 296.48306 | 79.541143 | 0.9970894 | 0.00018841 | 29.262  |
| NA | darkgrey      | 847.14549 | 51.00155  | 0.9855911 | 0.00207176 | 5.746   |
| NA | skyblue       | 411.94146 | 41.319168 | 0.9838836 | 0.00245009 | 5.552   |
| NA | pink          | 894.62975 | 149.62591 | 0.9996875 | 6.63E-06   | 0.514   |
| NA | purple        | 291.85782 | 80.220632 | 0.9997342 | 5.20E-06   | 36.304  |
| NA | brown         | 472.39421 | 98.183992 | 0.9321848 | 0.02098246 | 94.19   |
| NA | darkred       | 204.17818 | 46.471892 | 0.9898081 | 0.00123326 | 14.124  |
| NA | darkturquoise | 143.93032 | 34.945606 | 0.9287831 | 0.02256908 | 12.932  |
| NA | turquoise     | 919.69324 | 215.70237 | 0.9562505 | 0.01091247 | 5.722   |
| NA | red           | 990.78034 | 116.62991 | 0.97972   | 0.00345629 | 32.846  |
| NA | turquoise     | 880.25415 | 203.29902 | 0.942816  | 0.01627363 | 167.232 |
| NA | purple        | 299.63542 | 74.554212 | 0.9822803 | 0.00282399 | 11.506  |
| NA | tan           | 90.694908 | 16.313075 | 0.6564606 | 0.22884656 | 4.19    |
| NA | white         | 772.74025 | 43.546354 | 0.9350585 | 0.01967164 | 3.24    |
| NA | green         | 545.30461 | 88.528485 | 0.9384668 | 0.01815301 | 22.844  |

|    |               |           |           |           |            |          |
|----|---------------|-----------|-----------|-----------|------------|----------|
| NA | white         | 844.15548 | 45.714347 | 0.9563423 | 0.01087829 | 5.532    |
| NA | midnightblue  | 965.481   | 76.649021 | 0.9932815 | 0.0006604  | 10.702   |
| NA | purple        | 279.35616 | 74.860664 | 0.9827121 | 0.00272155 | 94.166   |
| NA | yellow        | 301.19829 | 132.49539 | 0.9948198 | 0.00044721 | 24.334   |
| NA | purple        | 168.61011 | 44.360767 | 0.8705281 | 0.05482492 | 5.518    |
| NA | turquoise     | 190.70089 | 70.880218 | 0.6750276 | 0.21120747 | 9.686    |
| NA | pink          | 908.35001 | 149.01511 | 0.9988025 | 4.97E-05   | 15.058   |
| NA | white         | 844.72532 | 46.265014 | 0.9573497 | 0.01050556 | 12.968   |
| NA | red           | 912.24855 | 125.77878 | 0.9962073 | 0.00028023 | 6.652    |
| NA | pink          | 936.8088  | 147.98584 | 0.9972694 | 0.00017122 | 4.94     |
| NA | violet        | 901.61103 | 46.463434 | 0.986457  | 0.00188808 | 9.364    |
| NA | blue          | 973.39319 | 137.07606 | 0.9725209 | 0.00544552 | 78.76    |
| NA | red           | 941.77689 | 125.88929 | 0.9961979 | 0.00028127 | 4.64     |
| NA | navy          | 822.14715 | 18.304996 | 0.0888475 | 0.88702481 | 1.7      |
| NA | white         | 958.87065 | 47.175026 | 0.9863265 | 0.00191541 | 5.444    |
| NA | turquoise     | 998.42758 | 199.10187 | 0.9112019 | 0.03133781 | 6.674    |
| NA | lightyellow   | 242.77677 | 45.625878 | 0.9221722 | 0.02575727 | 3.474    |
| NA | green         | 775.74328 | 112.8981  | 0.9927739 | 0.00073658 | 7.086    |
| NA | midnightblue  | 742.75904 | 71.26362  | 0.9786708 | 0.00372735 | 5.922    |
| NA | turquoise     | 1007.6634 | 214.44862 | 0.9399333 | 0.01751188 | 5.19     |
| NA | magenta       | 467.69889 | 66.446495 | 0.9297934 | 0.02209395 | 15.272   |
| NA | black         | 685.88474 | 101.54341 | 0.9849587 | 0.00220942 | 5.222    |
| NA | grey60        | 300.61057 | 67.192842 | 0.9932305 | 0.00066793 | 96.436   |
| NA | green         | 685.77857 | 105.34623 | 0.9781862 | 0.00385482 | 8.334    |
| NA | turquoise     | 844.47957 | 192.45749 | 0.920393  | 0.02663823 | 29.536   |
| NA | yellow        | 165.52104 | 63.783094 | 0.8307772 | 0.08141029 | 64.968   |
| NA | darkturquoise | 237.56578 | 37.925781 | 0.9451498 | 0.0152931  | 2.37     |
| NA | lightgreen    | 228.85746 | 28.955755 | 0.8265339 | 0.08443447 | 2090.904 |
| NA | darkred       | 186.94655 | 39.919374 | 0.9442857 | 0.01565385 | 48.878   |
| NA | purple        | 281.02007 | 77.971828 | 0.9944328 | 0.00049823 | 20.676   |
| NA | yellow        | 315.45449 | 123.63144 | 0.979667  | 0.00346982 | 3.702    |
| NA | yellow        | 206.61984 | 91.887041 | 0.9141338 | 0.02981214 | 4.198    |
| NA | green         | 657.05859 | 90.83888  | 0.9461191 | 0.0148917  | 12.444   |
| NA | brown         | 681.11055 | 121.24511 | 0.9657773 | 0.00756073 | 19.704   |
| NA | purple        | 310.56938 | 72.551456 | 0.9757491 | 0.00451689 | 15.91    |
| NA | turquoise     | 917.20001 | 202.09565 | 0.9305008 | 0.02176322 | 19.398   |
| NA | lightcyan     | 393.37358 | 48.547693 | 0.951611  | 0.01268458 | 26.696   |
| NA | yellow        | 267.6956  | 116.73898 | 0.9678708 | 0.00687986 | 13.466   |
| NA | purple        | 281.38169 | 69.617902 | 0.9658834 | 0.00752571 | 5.994    |
| NA | darkorange    | 144.94786 | 26.86066  | 0.9193357 | 0.0271663  | 1027.686 |
| NA | pink          | 1015.5611 | 127.98761 | 0.9667308 | 0.007248   | 19.756   |
| NA | greenyellow   | 131.95206 | 18.522522 | 0.6830771 | 0.20368388 | 22.962   |
| NA | violet        | 948.12465 | 45.809579 | 0.9749051 | 0.00475414 | 7.738    |
| NA | purple        | 299.26087 | 77.700331 | 0.9912329 | 0.00098412 | 8.294    |
| NA | salmon        | 236.00964 | 72.673057 | 0.9835513 | 0.00252614 | 6.776    |
| NA | blue          | 635.037   | 132.63071 | 0.9687475 | 0.00660108 | 3.27     |
| NA | turquoise     | 652.4906  | 176.07863 | 0.9147702 | 0.02948419 | 467.066  |
| NA | violet        | 46.941427 | 7.8264859 | -0.91697  | 0.02835951 | 6.314    |

|    |               |           |           |           |            |        |
|----|---------------|-----------|-----------|-----------|------------|--------|
| NA | salmon        | 230.36304 | 74.947263 | 0.9914256 | 0.00095188 | 7.74   |
| NA | violet        | 939.64972 | 46.42534  | 0.9812027 | 0.00308495 | 5.986  |
| NA | turquoise     | 863.03351 | 218.2866  | 0.9688688 | 0.0065628  | 27.338 |
| NA | darkturquoise | 156.36007 | 36.04521  | 0.9309408 | 0.02155834 | 52.652 |
| NA | darkgreen     | 196.32309 | 28.685876 | 0.8886653 | 0.04384201 | 409.45 |
| NA | turquoise     | 881.18851 | 223.96742 | 0.9831972 | 0.002608   | 8.472  |
| NA | violet        | 875.90554 | 46.727464 | 0.9941062 | 0.00054267 | 16.628 |
| NA | blue          | 639.42955 | 135.56246 | 0.9736292 | 0.00512026 | 4.182  |
| NA | white         | 1000.47   | 44.818353 | 0.9920321 | 0.00085277 | 7.442  |
| NA | brown         | 627.71092 | 130.7905  | 0.9936839 | 0.000602   | 9.09   |
| NA | brown         | 748.26674 | 134.66069 | 0.9956843 | 0.00034012 | 0.648  |
| NA | white         | 267.26137 | 17.108256 | -0.581448 | 0.30381608 | 5.754  |
| NA | white         | 880.44698 | 46.993085 | 0.9673284 | 0.00705424 | 10.376 |
| NA | white         | 894.62975 | 47.124713 | 0.9699838 | 0.00621445 | 0.962  |
| NA | blue          | 926.66304 | 148.64883 | 0.9920507 | 0.00084979 | 3.336  |
| NA | purple        | 138.96461 | 32.818502 | 0.7931687 | 0.10934605 | 45.506 |
| NA | black         | 596.44285 | 92.083471 | 0.9637478 | 0.00824063 | 6.484  |
| NA | turquoise     | 170.62468 | 48.209099 | 0.3851015 | 0.52207807 | 4.502  |
| NA | darkmagenta   | 231.24477 | 4.8669715 | -0.784432 | 0.11618333 | 5.374  |
| NA | purple        | 204.59881 | 52.507175 | 0.9061437 | 0.03402661 | 36.374 |
| NA | darkgreen     | 242.5376  | 38.932149 | 0.9661166 | 0.00744894 | 37.44  |
| NA | turquoise     | 290.41976 | 107.98523 | 0.7641007 | 0.13256405 | 42.778 |
| NA | turquoise     | 322.69699 | 116.62647 | 0.7467059 | 0.14707562 | 11.9   |
| NA | turquoise     | 547.23245 | 171.71038 | 0.9120047 | 0.03091764 | 11.754 |
| NA | lightgreen    | 442.97592 | 36.730974 | 0.9558958 | 0.01104483 | 42.158 |
| NA | purple        | 294.00012 | 75.880543 | 0.9866011 | 0.00185807 | 7.782  |
| NA | salmon        | 246.45116 | 68.503031 | 0.9708586 | 0.00594554 | 12.616 |
| NA | darkred       | 183.32937 | 41.465594 | 0.9624136 | 0.00869793 | 2.83   |
| NA | grey60        | 292.67954 | 62.615489 | 0.977715  | 0.00398012 | 12.666 |
| NA | purple        | 284.14912 | 78.599009 | 0.9954423 | 0.0003691  | 8.656  |
| NA | midnightblue  | 720.51371 | 66.14822  | 0.9631064 | 0.00845945 | 6.134  |
| NA | violet        | 161.40976 | 8.3858237 | 0.4044594 | 0.4994333  | 11.934 |
| NA | darkturquoise | 107.69828 | 21.184813 | 0.8175088 | 0.09097794 | 5.662  |
| NA | yellow        | 269.30275 | 118.32406 | 0.9685539 | 0.0066623  | 4.82   |
| NA | darkgreen     | 183.83494 | 28.003022 | 0.8813873 | 0.0481558  | 6.078  |
| NA | turquoise     | 892.8224  | 224.55517 | 0.9825962 | 0.00274893 | 9.25   |
| NA | yellow        | 296.21078 | 134.20895 | 0.9982238 | 8.98E-05   | 8.524  |
| NA | turquoise     | 927.09392 | 215.74935 | 0.9564462 | 0.01083967 | 7.34   |
| NA | blue          | 775.87155 | 135.89636 | 0.9733047 | 0.00521482 | 6.278  |
| NA | red           | 681.6595  | 106.31915 | 0.9620094 | 0.00883809 | 12.108 |
| NA | lightgreen    | 390.19914 | 35.394556 | 0.9262007 | 0.02379828 | 8.742  |
| NA | paleturquoise | 181.17117 | 23.714116 | 0.9416376 | 0.01677626 | 6.462  |
| NA | darkred       | 202.16238 | 46.13568  | 0.9871956 | 0.00173596 | 2.668  |
| NA | turquoise     | 621.94538 | 169.70992 | 0.908792  | 0.03260998 | 14.53  |
| NA | paleturquoise | 159.0558  | 19.2313   | 0.8911736 | 0.04238538 | 4.512  |
| NA | salmon        | 205.09757 | 71.971838 | 0.9832103 | 0.00260495 | 3.638  |
| NA | paleturquoise | 154.45698 | 22.947028 | 0.9510547 | 0.01290285 | 77.926 |
| NA | salmon        | 194.21831 | 58.747898 | 0.9388755 | 0.01797357 | 4.47   |

|    |               |           |           |           |            |         |
|----|---------------|-----------|-----------|-----------|------------|---------|
| NA | tan           | 121.16107 | 35.333668 | 0.9073649 | 0.03337095 | 52.268  |
| NA | darkturquoise | 251.91821 | 36.736207 | 0.9364241 | 0.01905842 | 35.444  |
| NA | tan           | 159.00031 | 30.619462 | 0.8629635 | 0.05962846 | 2.078   |
| NA | grey60        | 309.14265 | 66.756298 | 0.9913213 | 0.00096928 | 67.304  |
| NA | darkgreen     | 231.36004 | 41.866263 | 0.9849305 | 0.00221564 | 101.02  |
| NA | darkred       | 219.06196 | 44.112899 | 0.9773811 | 0.00406971 | 3.976   |
| NA | darkred       | 169.17798 | 39.745484 | 0.9510906 | 0.01288873 | 5.266   |
| NA | yellow        | 307.90569 | 124.55989 | 0.9822976 | 0.00281986 | 61.324  |
| NA | darkgreen     | 202.56724 | 36.518393 | 0.9513443 | 0.01278908 | 9.338   |
| NA | paleturquoise | 146.5521  | 17.682213 | 0.8683328 | 0.05620586 | 3.796   |
| NA | paleturquoise | 184.85475 | 27.615043 | 0.9890723 | 0.00136903 | 3.93    |
| NA | salmon        | 199.44845 | 65.978672 | 0.9642715 | 0.00806333 | 12.008  |
| NA | navy          | 79.041458 | 20.518187 | 0.7715225 | 0.1265099  | 14.076  |
| NA | pink          | 894.62975 | 149.62591 | 0.9996875 | 6.63E-06   | 1.732   |
| NA | lightcyan     | 252.07114 | 39.279101 | 0.8940846 | 0.04071455 | 14.966  |
| NA | turquoise     | 223.3055  | 61.871016 | 0.5219201 | 0.36701195 | 26.222  |
| NA | grey60        | 315.11161 | 68.819562 | 0.9982074 | 9.11E-05   | 6.112   |
| NA | darkgreen     | 251.18438 | 42.165903 | 0.9906617 | 0.00108174 | 12.184  |
| NA | green         | 928.64516 | 105.8042  | 0.9733236 | 0.0052093  | 134.056 |
| NA | yellow        | 243.29551 | 112.50803 | 0.9591166 | 0.00986219 | 10.412  |
| NA | yellow        | 230.17999 | 103.00988 | 0.9373776 | 0.01863399 | 71.61   |
| NA | darkred       | 83.003643 | 17.632686 | 0.7668759 | 0.13029041 | 33.338  |
| NA | skyblue       | 439.06296 | 43.250376 | 0.9937529 | 0.00059217 | 9.484   |
| NA | turquoise     | 802.32092 | 198.54959 | 0.9270307 | 0.02340093 | 31.238  |
| NA | pink          | 976.43173 | 137.42934 | 0.9818285 | 0.00293247 | 1.286   |
| NA | yellow        | 309.97622 | 128.53897 | 0.9890708 | 0.00136931 | 12.748  |
| NA | purple        | 261.26    | 65.573624 | 0.9503966 | 0.01316263 | 13.952  |
| NA | royalblue     | 400.72514 | 51.595774 | 0.9491467 | 0.01366066 | 89.386  |
| NA | salmon        | 105.16864 | 39.343862 | 0.8574415 | 0.06321375 | 49.154  |
| NA | blue          | 577.85654 | 112.71965 | 0.9349024 | 0.01974214 | 25.89   |
| NA | yellow        | 179.21481 | 75.281589 | 0.8647758 | 0.0584661  | 72.332  |
| NA | grey          | 45.499302 | 0.0093525 | -0.111052 | 0.85889574 | 43.324  |
| NA | darkgrey      | 758.76937 | 46.279454 | 0.9654204 | 0.00767887 | 5.616   |
| NA | salmon        | 227.62261 | 77.805535 | 0.9992686 | 2.37E-05   | 26.916  |
| NA | greenyellow   | 71.870173 | 6.5696112 | 0.4644437 | 0.43065894 | 135.68  |
| NA | orange        | 247.32689 | 37.629157 | 0.9977373 | 0.00012916 | 46.772  |
| NA | salmon        | 252.29425 | 66.50596  | 0.9637863 | 0.00822756 | 11.49   |
| NA | darkred       | 201.91667 | 46.576479 | 0.9907466 | 0.00106705 | 3.928   |
| NA | purple        | 220.8174  | 56.648632 | 0.9211611 | 0.02625677 | 112.576 |
| NA | greenyellow   | 239.03027 | 37.051451 | 0.9562794 | 0.0109017  | 0.586   |
| NA | orange        | 74.521816 | 8.5040896 | 0.6237544 | 0.26083602 | 12.014  |
| NA | greenyellow   | 99.373925 | 14.771209 | 0.7075525 | 0.18128895 | 27.926  |
| NA | grey60        | 314.70048 | 68.724742 | 0.9978371 | 0.00012071 | 13.052  |
| NA | yellow        | 299.71689 | 127.32422 | 0.9852628 | 0.00214287 | 16.392  |
| NA | yellow        | 294.15012 | 115.99386 | 0.9641214 | 0.00811401 | 246.866 |
| NA | darkgrey      | 1011.4944 | 50.411262 | 0.9813338 | 0.0030528  | 7.332   |
| NA | darkgrey      | 894.23404 | 50.645579 | 0.9842104 | 0.00237606 | 4.524   |
| NA | darkorange    | 168.41127 | 30.24248  | 0.9599865 | 0.00955037 | 53.108  |



|    |               |           |           |           |            |         |
|----|---------------|-----------|-----------|-----------|------------|---------|
| NA | blue          | 941.88891 | 148.08233 | 0.9909386 | 0.00103403 | 2.482   |
| NA | darkgreen     | 252.5695  | 40.8083   | 0.9818545 | 0.00292619 | 84.786  |
| NA | purple        | 295.27161 | 78.722063 | 0.9950535 | 0.00041732 | 13.864  |
| NA | pink          | 621.66421 | 120.33435 | 0.9552219 | 0.0112978  | 5.156   |
| NA | yellow        | 240.41446 | 107.31448 | 0.9480987 | 0.01408285 | 19.336  |
| NA | brown         | 813.50523 | 126.92448 | 0.9801145 | 0.00335613 | 15.624  |
| NA | salmon        | 227.55178 | 72.520433 | 0.9837025 | 0.00249145 | 2.536   |
| NA | blue          | 910.94741 | 144.36783 | 0.9855395 | 0.00208289 | 13.024  |
| NA | turquoise     | 165.48708 | 64.100533 | 0.595419  | 0.28943314 | 61.652  |
| NA | black         | 915.55288 | 99.184525 | 0.978686  | 0.00372338 | 3.772   |
| NA | purple        | 305.10441 | 76.128279 | 0.9864386 | 0.00189194 | 10.708  |
| NA | darkorange    | 141.31044 | 32.475733 | 0.9750265 | 0.00471977 | 15.164  |
| NA | darkturquoise | 228.69683 | 42.316545 | 0.9696167 | 0.00632844 | 34.224  |
| NA | yellow        | 306.58823 | 128.75906 | 0.9890841 | 0.00136683 | 14.922  |
| NA | navy          | 60.171926 | 29.042642 | 0.9074357 | 0.03333308 | 469.454 |
| NA | darkred       | 192.23186 | 35.367255 | 0.9045998 | 0.03486129 | 14.7    |
| NA | lightcyan     | 142.4372  | 24.44029  | 0.7502073 | 0.14411909 | 15.144  |
| NA | paleturquoise | 165.54382 | 20.568854 | 0.9163513 | 0.0286746  | 28.908  |
| NA | yellow        | 313.95951 | 128.72432 | 0.9884068 | 0.00149583 | 5.882   |
| NA | greenyellow   | 201.34106 | 39.507436 | 0.9911758 | 0.00099374 | 7.252   |
| NA | yellow        | 252.6786  | 117.35974 | 0.9675591 | 0.00697989 | 19.888  |
| NA | pink          | 925.50841 | 143.8911  | 0.991575  | 0.00092712 | 3.346   |
| NA | tan           | 173.2182  | 28.927751 | 0.8296627 | 0.0822013  | 60.614  |
| NA | lightcyan     | 338.97651 | 56.407489 | 0.9861337 | 0.00195601 | 6.638   |
| NA | pink          | 915.63554 | 148.31361 | 0.9978044 | 0.00012346 | 3.402   |
| NA | turquoise     | 944.05344 | 206.31503 | 0.9345784 | 0.01988875 | 8.274   |
| NA | lightcyan     | 217.19279 | 38.087699 | 0.8852645 | 0.04584177 | 52.9    |
| NA | turquoise     | 487.63165 | 143.95204 | 0.8574751 | 0.06319176 | 20.958  |
| NA | greenyellow   | 197.61157 | 39.970286 | 0.9566594 | 0.0107605  | 7.7     |
| NA | lightcyan     | 138.79638 | 23.163532 | 0.7327779 | 0.15900794 | 5.636   |
| NA | grey60        | 314.72079 | 69.104301 | 0.9989219 | 4.25E-05   | 38.772  |
| NA | tan           | 113.34178 | 28.757148 | 0.8290096 | 0.08266591 | 6.456   |
| NA | purple        | 240.66031 | 54.14388  | 0.9133215 | 0.03023237 | 26.768  |
| NA | blue          | 681.14798 | 90.277192 | 0.878093  | 0.0501501  | 7.53    |
| NA | darkgrey      | 997.17342 | 50.774107 | 0.9829967 | 0.00265475 | 6.094   |
| NA | black         | 669.31465 | 98.61728  | 0.9792456 | 0.00357801 | 39.996  |
| NA | purple        | 294.41104 | 76.822276 | 0.9891644 | 0.00135178 | 5.302   |
| NA | pink          | 894.62975 | 149.62591 | 0.9996875 | 6.63E-06   | 1.348   |
| NA | red           | 832.05018 | 120.256   | 0.9873116 | 0.00171244 | 6.848   |
| NA | magenta       | 427.01671 | 74.178091 | 0.9574965 | 0.01045158 | 34.934  |
| NA | pink          | 974.65766 | 144.8498  | 0.9926407 | 0.00075702 | 15.73   |
| NA | magenta       | 157.97238 | 63.354299 | 0.9239307 | 0.02489599 | 7.214   |
| NA | brown         | 849.37351 | 122.44447 | 0.9675889 | 0.0069703  | 31.352  |
| NA | darkred       | 41.52989  | 5.5291669 | 0.4801412 | 0.41304214 | 292.206 |
| NA | greenyellow   | 60.958694 | 13.144684 | 0.4853154 | 0.4072725  | 12.97   |
| NA | darkgrey      | 960.29165 | 51.906972 | 0.9883755 | 0.00150189 | 4.58    |
| NA | magenta       | 513.973   | 63.043151 | 0.9129236 | 0.0304389  | 5.706   |
| NA | darkgreen     | 182.99196 | 34.59866  | 0.9288835 | 0.02252173 | 70.158  |

|    |               |           |           |           |            |         |
|----|---------------|-----------|-----------|-----------|------------|---------|
| NA | lightcyan     | 527.43753 | 57.532756 | 0.9775378 | 0.00402758 | 5.446   |
| NA | magenta       | 247.67521 | 82.984051 | 0.9908034 | 0.00105724 | 4.976   |
| NA | turquoise     | 488.68292 | 59.700482 | 0.215885  | 0.72727695 | 13.406  |
| NA | purple        | 273.27863 | 76.992063 | 0.9912009 | 0.00098951 | 38.5    |
| NA | darkturquoise | 200.55248 | 38.101543 | 0.9465848 | 0.01470012 | 156.006 |
| NA | lightcyan     | 196.83248 | 34.616311 | 0.8505365 | 0.06778789 | 5.87    |
| NA | turquoise     | 290.74884 | 55.435608 | -0.168186 | 0.78687296 | 8.31    |
| NA | turquoise     | 247.21094 | 93.82426  | 0.6893955 | 0.19783226 | 10.782  |
| NA | pink          | 1004.1733 | 130.92498 | 0.9714636 | 0.00576188 | 45.272  |
| NA | magenta       | 207.69633 | 76.468183 | 0.9707127 | 0.00599011 | 4.288   |
| NA | magenta       | 289.36206 | 71.5651   | 0.9577543 | 0.01035707 | 9.486   |
| NA | salmon        | 180.15517 | 67.375341 | 0.9703213 | 0.00611023 | 1.88    |
| NA | turquoise     | 328.19568 | 60.115206 | -0.105985 | 0.86530828 | 9.844   |
| NA | red           | 894.62975 | 127.58416 | 0.9992509 | 2.46E-05   | 1.156   |
| NA | darkorange    | 157.264   | 28.279075 | 0.9442125 | 0.01568454 | 85.036  |
| NA | green         | 897.48587 | 109.52735 | 0.9821994 | 0.0028433  | 7.432   |
| NA | brown         | 604.02532 | 123.7293  | 0.9827273 | 0.00271798 | 6.626   |
| NA | darkred       | 199.6352  | 46.097809 | 0.9874209 | 0.00169039 | 29.3    |
| NA | salmon        | 172.45418 | 66.046479 | 0.9652032 | 0.0077511  | 6.01    |
| NA | white         | 954.08481 | 43.044445 | 0.9796737 | 0.0034681  | 20.7    |
| NA | yellow        | 242.26084 | 111.21038 | 0.956681  | 0.01075249 | 203.338 |
| NA | grey60        | 263.33586 | 57.086221 | 0.9579788 | 0.01027496 | 18.414  |
| NA | grey60        | 314.63871 | 67.319081 | 0.9933166 | 0.00065523 | 9.144   |
| NA | greenyellow   | 242.10766 | 37.052212 | 0.9754897 | 0.00458937 | 561.086 |
| NA | lightyellow   | 323.45608 | 57.330849 | 0.9730528 | 0.00528861 | 7.702   |
| NA | red           | 1010.0172 | 113.2408  | 0.9735128 | 0.00515412 | 24.956  |
| NA | purple        | 271.45699 | 76.191404 | 0.9887185 | 0.00143597 | 5.09    |
| NA | lightgreen    | 391.17452 | 34.647751 | 0.8602908 | 0.0613556  | 14.738  |
| NA | darkred       | 215.63893 | 44.786419 | 0.9792777 | 0.00356973 | 3.646   |
| NA | yellow        | 289.51444 | 133.07184 | 0.9965631 | 0.00024175 | 2.122   |
| NA | darkred       | 173.40607 | 37.956454 | 0.9441882 | 0.01569471 | 21.29   |
| NA | turquoise     | 242.55846 | 91.067994 | 0.7021349 | 0.18618207 | 57.572  |
| NA | grey60        | 312.98443 | 68.470364 | 0.9969876 | 0.00019838 | 4.3     |
| NA | greenyellow   | 55.079723 | 12.87191  | 0.2991409 | 0.62488122 | 61.326  |
| NA | pink          | 836.62305 | 146.02289 | 0.9948128 | 0.00044812 | 17.188  |
| NA | white         | 902.27407 | 47.442812 | 0.9738624 | 0.00505269 | 10.072  |
| NA | greenyellow   | 51.348056 | 8.117986  | 0.3817067 | 0.5260701  | 21.53   |
| NA | turquoise     | 166.82848 | 61.742284 | 0.5824742 | 0.30275302 | 89.56   |
| NA | black         | 905.38436 | 100.85145 | 0.9825289 | 0.00276487 | 23.73   |
| NA | royalblue     | 737.97899 | 57.844443 | 0.9750542 | 0.00471194 | 12.292  |
| NA | greenyellow   | 72.149925 | 12.870412 | 0.4694753 | 0.42499386 | 26.624  |
| NA | yellow        | 307.49843 | 130.73921 | 0.9921974 | 0.00082639 | 15.368  |
| NA | white         | 274.17295 | 16.880345 | -0.589009 | 0.29600987 | 159.446 |
| NA | grey          | 567.7703  | 14.699835 | 0.9811609 | 0.00309522 | 11.224  |
| NA | red           | 884.33261 | 125.72147 | 0.996291  | 0.00027101 | 4.904   |
| NA | purple        | 304.40115 | 76.228256 | 0.9870853 | 0.00175839 | 6.024   |
| NA | violet        | 863.86377 | 46.361648 | 0.9947378 | 0.00045787 | 2.1     |
| NA | brown         | 660.6513  | 131.1069  | 0.993875  | 0.00057491 | 2.848   |

|    |               |           |           |           |            |         |
|----|---------------|-----------|-----------|-----------|------------|---------|
| NA | pink          | 894.62975 | 149.62591 | 0.9996875 | 6.63E-06   | 1.412   |
| NA | royalblue     | 837.59903 | 54.89234  | 0.9622907 | 0.00874048 | 24.256  |
| NA | grey60        | 220.7718  | 46.45399  | 0.9148638 | 0.02943606 | 17.628  |
| NA | turquoise     | 200.67928 | 74.24649  | 0.6425645 | 0.24229918 | 4.49    |
| NA | purple        | 237.76304 | 67.476016 | 0.9626831 | 0.00860491 | 731.748 |
| NA | purple        | 267.03793 | 74.790262 | 0.9847009 | 0.00226639 | 19.74   |
| NA | green         | 641.44722 | 102.10606 | 0.9709221 | 0.00592619 | 4.542   |
| NA | grey60        | 292.23832 | 58.278328 | 0.9622948 | 0.00873906 | 8.486   |
| NA | darkred       | 195.11276 | 42.782746 | 0.9651083 | 0.00778272 | 5.568   |
| NA | navy          | 48.781083 | 17.476148 | 0.7927182 | 0.10969556 | 94.166  |
| NA | paleturquoise | 187.83814 | 23.766256 | 0.9522165 | 0.01244838 | 260.766 |
| NA | blue          | 640.43986 | 137.83571 | 0.9782008 | 0.00385097 | 14.458  |
| NA | turquoise     | 471.54463 | 152.44995 | 0.862719  | 0.05978581 | 2.09    |
| NA | orange        | 369.32951 | 33.191302 | 0.9697198 | 0.00629635 | 9.344   |
| NA | white         | 258.28426 | 16.20861  | -0.709688 | 0.17937009 | 64.866  |
| NA | greenyellow   | 100.07996 | 11.018116 | 0.6209028 | 0.263678   | 20.624  |
| NA | turquoise     | 544.47802 | 171.45027 | 0.9321779 | 0.02098564 | 14.076  |
| NA | darkred       | 201.88744 | 45.327974 | 0.9835879 | 0.00251772 | 25.772  |
| NA | darkgreen     | 162.64061 | 33.800839 | 0.9149752 | 0.02937884 | 15.356  |
| NA | darkred       | 211.41245 | 41.539467 | 0.9543267 | 0.01163669 | 7.03    |
| NA | yellow        | 273.39915 | 105.5872  | 0.9390797 | 0.01788414 | 2.674   |
| NA | grey          | 429.8974  | 14.949534 | 0.9875083 | 0.00167282 | 18.584  |
| NA | black         | 874.59073 | 102.80632 | 0.9868123 | 0.00181438 | 17.466  |
| NA | white         | 916.64185 | 47.242739 | 0.9785238 | 0.00376587 | 18.35   |
| NA | purple        | 306.41566 | 76.325581 | 0.9873417 | 0.00170637 | 25.312  |
| NA | yellow        | 269.88865 | 103.87074 | 0.9361291 | 0.01919038 | 78.944  |
| NA | grey60        | 286.42172 | 62.682974 | 0.9784069 | 0.0037966  | 11.334  |
| NA | brown         | 197.08296 | 21.386381 | 0.5878274 | 0.29722585 | 12.78   |
| NA | turquoise     | 237.04924 | 70.097853 | 0.5993968 | 0.28537162 | 4.532   |
| NA | lightyellow   | 494.3734  | 62.179667 | 0.9913023 | 0.00097247 | 14.21   |
| NA | green         | 916.81027 | 115.01827 | 0.9956006 | 0.00035005 | 2.548   |
| NA | brown         | 694.2636  | 136.39268 | 0.9987987 | 5.00E-05   | 6.856   |
| NA | royalblue     | 743.90472 | 61.694418 | 0.9893933 | 0.00130923 | 6.454   |
| NA | greenyellow   | 91.512608 | 10.335338 | 0.57275   | 0.31285995 | 237.388 |
| NA | brown         | 115.58719 | 11.305632 | 0.3131012 | 0.6079599  | 12.118  |
| NA | darkmagenta   | 358.73367 | 3.7412243 | -0.700096 | 0.18803277 | 30.906  |
| NA | navy          | 899.8914  | 19.168376 | 0.1016906 | 0.87074701 | 2.048   |
| NA | blue          | 553.25703 | 86.800406 | 0.8722343 | 0.05375912 | 8.246   |
| NA | brown         | 529.62183 | 113.45339 | 0.9643788 | 0.00802719 | 15.994  |
| NA | violet        | 44.397548 | 8.2588774 | -0.860663 | 0.06111383 | 2.472   |
| NA | darkgreen     | 264.20477 | 42.723932 | 0.9965148 | 0.00024686 | 17.072  |
| NA | tan           | 347.01544 | 30.677121 | 0.8381396 | 0.07624458 | 6.444   |
| NA | red           | 1007.1251 | 115.05766 | 0.9769037 | 0.00419893 | 20.888  |
| NA | red           | 899.16037 | 126.02209 | 0.9966895 | 0.00022854 | 5.712   |
| NA | yellow        | 284.45911 | 130.0728  | 0.9914998 | 0.00093956 | 120.698 |
| NA | lightyellow   | 632.47109 | 54.802597 | 0.9614715 | 0.00902569 | 6.904   |
| NA | white         | 179.49519 | 13.736927 | -0.759154 | 0.13664548 | 8.124   |
| NA | yellow        | 268.66329 | 123.18643 | 0.9794117 | 0.00353523 | 5.49    |

|    |               |           |           |           |            |          |
|----|---------------|-----------|-----------|-----------|------------|----------|
| NA | darkgrey      | 774.73602 | 44.033752 | 0.9560623 | 0.01098262 | 13.386   |
| NA | midnightblue  | 989.43292 | 71.491602 | 0.9783593 | 0.00380912 | 7.018    |
| NA | blue          | 662.02119 | 121.61895 | 0.9487745 | 0.01381011 | 6.838    |
| NA | turquoise     | 220.3768  | 89.3886   | 0.6899021 | 0.19736519 | 0.238    |
| NA | greenyellow   | 48.021434 | 9.331978  | 0.4053005 | 0.49845402 | 20.468   |
| NA | turquoise     | 749.08581 | 175.98227 | 0.9079486 | 0.03305902 | 4.008    |
| NA | grey60        | 314.51513 | 69.150858 | 0.999078  | 3.36E-05   | 5.65     |
| NA | paleturquoise | 181.9877  | 27.560503 | 0.9873906 | 0.00169649 | 90.52    |
| NA | turquoise     | 236.56797 | 89.126707 | 0.6666224 | 0.21914405 | 16.608   |
| NA | yellow        | 276.26722 | 128.09806 | 0.9879604 | 0.00158295 | 17.43    |
| NA | violet        | 727.19041 | 40.534453 | 0.9741263 | 0.00497655 | 6.276    |
| NA | lightyellow   | 240.9861  | 38.086037 | 0.8875109 | 0.04451767 | 25.964   |
| NA | brown         | 281.2506  | 36.465726 | 0.7088711 | 0.18010363 | 11.378   |
| NA | blue          | 465.1693  | 108.59315 | 0.9238189 | 0.02495045 | 29.92    |
| NA | darkred       | 132.64104 | 23.293257 | 0.8226787 | 0.08721128 | 17.468   |
| NA | darkgrey      | 955.59338 | 49.074727 | 0.976743  | 0.00424272 | 7.664    |
| NA | tan           | 274.96631 | 31.202297 | 0.8492515 | 0.06865003 | 15.51    |
| NA | white         | 930.35576 | 46.987478 | 0.9796623 | 0.00347102 | 3.34     |
| NA | turquoise     | 957.88064 | 213.4217  | 0.9461473 | 0.01488008 | 2.408    |
| NA | turquoise     | 210.17767 | 48.495203 | -0.302452 | 0.62086034 | 6.088    |
| NA | purple        | 282.74983 | 78.625257 | 0.9961251 | 0.00028939 | 5.746    |
| NA | violet        | 667.38419 | 38.326372 | 0.9721508 | 0.00555558 | 2.036    |
| NA | turquoise     | 942.2606  | 227.21177 | 0.9800466 | 0.00337331 | 6.332    |
| NA | salmon        | 188.78093 | 69.540493 | 0.9759885 | 0.00445033 | 8.478    |
| NA | magenta       | 181.51975 | 72.100737 | 0.9552086 | 0.01130281 | 24.706   |
| NA | grey60        | 228.84634 | 47.383559 | 0.9205105 | 0.02657977 | 11.632   |
| NA | brown         | 634.45836 | 127.31216 | 0.9878785 | 0.00159911 | 7.164    |
| NA | blue          | 867.98346 | 131.32309 | 0.9643639 | 0.00803219 | 22.042   |
| NA | turquoise     | 218.04508 | 81.19194  | 0.6671919 | 0.21860369 | 340.864  |
| NA | yellow        | 313.08756 | 129.53886 | 0.9902171 | 0.00115983 | 102.718  |
| NA | lightcyan     | 187.1842  | 28.303672 | 0.8383709 | 0.07608404 | 51.636   |
| NA | green         | 468.4736  | 76.416464 | 0.9050177 | 0.03463472 | 21.488   |
| NA | lightgreen    | 367.12433 | 36.180113 | 0.9401361 | 0.01742378 | 9.486    |
| NA | turquoise     | 709.15424 | 199.15887 | 0.9649791 | 0.00782582 | 3.842    |
| NA | tan           | 285.92036 | 36.097287 | 0.8916303 | 0.0421218  | 3.558    |
| NA | lightgreen    | 369.92511 | 31.666685 | 0.9270259 | 0.02340318 | 46.222   |
| NA | pink          | 762.23226 | 132.36516 | 0.9749978 | 0.00472786 | 155.31   |
| NA | purple        | 191.69469 | 46.493034 | 0.8731938 | 0.05316264 | 1008.516 |
| NA | violet        | 53.122186 | 10.246999 | -0.928236 | 0.02282768 | 11.132   |
| NA | red           | 930.45374 | 126.765   | 0.9976623 | 0.00013564 | 2.064    |
| NA | red           | 918.23482 | 124.50586 | 0.9939961 | 0.00055795 | 3.572    |
| NA | darkgreen     | 236.49934 | 41.724464 | 0.9874515 | 0.00168423 | 20.696   |
| NA | turquoise     | 842.51965 | 184.26752 | 0.8897908 | 0.04318648 | 5.16     |
| NA | purple        | 289.67604 | 78.548656 | 0.9942644 | 0.00052099 | 33.242   |
| NA | black         | 913.13432 | 103.32829 | 0.987796  | 0.00161544 | 199.596  |
| NA | royalblue     | 537.66542 | 58.826115 | 0.9811163 | 0.00310622 | 28.368   |
| NA | turquoise     | 572.86623 | 171.00012 | 0.9185249 | 0.02757344 | 7.718    |
| NA | tan           | 118.9328  | 30.753034 | 0.8630135 | 0.05959626 | 10.248   |

|    |               |           |           |           |            |         |
|----|---------------|-----------|-----------|-----------|------------|---------|
| NA | lightyellow   | 518.03976 | 60.414752 | 0.9853734 | 0.00211882 | 18.13   |
| NA | magenta       | 199.03181 | 76.024117 | 0.9688956 | 0.00655435 | 30.312  |
| NA | black         | 600.55005 | 92.956302 | 0.9658266 | 0.00754446 | 12.102  |
| NA | skyblue       | 406.56595 | 41.64748  | 0.9855115 | 0.00208893 | 163.098 |
| NA | darkorange    | 128.78824 | 31.1911   | 0.9636009 | 0.00829056 | 3.974   |
| NA | purple        | 203.06944 | 49.00002  | 0.8924211 | 0.04166674 | 14.254  |
| NA | magenta       | 437.70475 | 76.408011 | 0.9633109 | 0.00838947 | 8.662   |
| NA | green         | 722.02333 | 106.14491 | 0.9803031 | 0.00330858 | 8.828   |
| NA | black         | 907.4721  | 102.24334 | 0.9862674 | 0.00192782 | 28.73   |
| NA | red           | 934.90685 | 125.98264 | 0.9963182 | 0.00026803 | 5.218   |
| NA | turquoise     | 872.89478 | 202.7012  | 0.9270377 | 0.02339754 | 27.2    |
| NA | darkturquoise | 225.23757 | 40.861383 | 0.9605976 | 0.00933328 | 10.49   |
| NA | lightcyan     | 466.85906 | 53.611478 | 0.9640121 | 0.008151   | 19.224  |
| NA | yellow        | 154.06111 | 60.856415 | 0.8211611 | 0.0883119  | 20.542  |
| NA | brown         | 703.11399 | 136.2249  | 0.997552  | 0.00014534 | 11.212  |
| NA | magenta       | 100.26961 | 42.00027  | 0.8198795 | 0.08924466 | 23.23   |
| NA | royalblue     | 723.5996  | 61.528268 | 0.9894672 | 0.00129558 | 29.382  |
| NA | navy          | 82.063074 | 7.3271889 | -0.567639 | 0.31820614 | 6.6     |
| NA | tan           | 89.924163 | 22.550178 | 0.7286933 | 0.16255824 | 23.228  |
| NA | turquoise     | 809.57927 | 213.47268 | 0.9733632 | 0.00519772 | 12.518  |
| NA | turquoise     | 901.47354 | 220.56193 | 0.9700791 | 0.00618497 | 8.486   |
| NA | blue          | 853.5275  | 143.40111 | 0.9840214 | 0.0024188  | 9.212   |
| NA | yellow        | 235.99709 | 84.447839 | 0.886904  | 0.04487418 | 15.364  |
| NA | turquoise     | 399.81854 | 138.37645 | 0.8587135 | 0.06238209 | 4.5     |
| NA | lightyellow   | 298.50063 | 48.130895 | 0.9365928 | 0.01898311 | 123.366 |
| NA | lightcyan     | 273.7527  | 46.771602 | 0.9414236 | 0.01686806 | 15.382  |
| NA | pink          | 766.79369 | 136.9849  | 0.981767  | 0.00294734 | 6.14    |
| NA | darkgrey      | 841.19766 | 51.54784  | 0.9877963 | 0.00161539 | 6.848   |
| NA | black         | 941.84313 | 98.830004 | 0.978192  | 0.0038533  | 6.618   |
| NA | black         | 819.76705 | 107.89626 | 0.9976909 | 0.00013316 | 1.112   |
| NA | red           | 944.03277 | 123.59893 | 0.9924168 | 0.00079181 | 8.292   |
| NA | lightyellow   | 622.15134 | 56.928769 | 0.9699872 | 0.0062134  | 9.078   |
| NA | turquoise     | 917.00012 | 222.64383 | 0.9750843 | 0.00470341 | 3.838   |
| NA | salmon        | 222.58417 | 74.508506 | 0.9906701 | 0.0010803  | 138.208 |
| NA | turquoise     | 195.66813 | 46.395687 | -0.386784 | 0.52010199 | 35.68   |
| NA | turquoise     | 939.65933 | 212.32749 | 0.9479899 | 0.01412695 | 3.832   |
| NA | purple        | 295.24065 | 79.910807 | 0.9985997 | 6.29E-05   | 15.684  |
| NA | blue          | 954.82947 | 144.23996 | 0.9845784 | 0.00229362 | 11.744  |
| NA | red           | 929.51148 | 126.83827 | 0.9977905 | 0.00012463 | 4.254   |
| NA | turquoise     | 363.16186 | 129.92002 | 0.8515466 | 0.06711256 | 6.604   |
| NA | red           | 861.14398 | 126.08984 | 0.9969153 | 0.00020557 | 6.406   |
| NA | darkgreen     | 267.24754 | 41.612003 | 0.9886561 | 0.00144789 | 17.258  |
| NA | lightgreen    | 297.8019  | 30.138564 | 0.8309143 | 0.08131315 | 3.29    |
| NA | grey          | 301.06685 | 12.174571 | 0.9442843 | 0.01565442 | 4.116   |
| NA | darkturquoise | 216.84366 | 43.503024 | 0.9799072 | 0.00340863 | 71.968  |
| NA | green         | 557.3467  | 80.872851 | 0.9208253 | 0.0264233  | 7.234   |
| NA | darkred       | 111.80595 | 25.437864 | 0.8261485 | 0.08471084 | 11.4    |
| NA | brown         | 417.3262  | 86.032572 | 0.905376  | 0.03444081 | 5.694   |

|    |               |           |           |           |            |        |
|----|---------------|-----------|-----------|-----------|------------|--------|
| NA | navy          | 141.72693 | 40.651485 | 0.9803926 | 0.0032861  | 9.636  |
| NA | magenta       | 352.30248 | 66.726728 | 0.9394587 | 0.01771852 | 36.04  |
| NA | salmon        | 221.6329  | 72.790082 | 0.9846671 | 0.00227389 | 2.974  |
| NA | darkorange    | 198.29562 | 11.171578 | 0.7277661 | 0.1633673  | 5.71   |
| NA | pink          | 844.92618 | 147.27961 | 0.9965444 | 0.00024372 | 3.412  |
| NA | yellow        | 275.57484 | 125.6439  | 0.9833469 | 0.00257328 | 3.448  |
| NA | lightcyan     | 383.78833 | 57.889381 | 0.9907951 | 0.00105868 | 3.626  |
| NA | greenyellow   | 160.63435 | 28.76712  | 0.9221695 | 0.0257586  | 49.002 |
| NA | magenta       | 365.49299 | 81.37314  | 0.982584  | 0.00275181 | 12.478 |
| NA | tan           | 106.90268 | 29.497746 | 0.8271553 | 0.0839895  | 25.732 |
| NA | red           | 871.61577 | 125.80543 | 0.9964709 | 0.00025154 | 2.542  |
| NA | salmon        | 219.14187 | 75.53241  | 0.9929973 | 0.00070271 | 1.786  |
| NA | pink          | 894.97665 | 145.04011 | 0.9933798 | 0.00064597 | 1.598  |
| NA | salmon        | 243.06126 | 71.852357 | 0.9809633 | 0.00314396 | 4.4    |
| NA | red           | 869.17738 | 126.73725 | 0.9979353 | 0.00011259 | 3.178  |
| NA | yellow        | 306.08965 | 128.53376 | 0.9883906 | 0.00149896 | 31.642 |
| NA | salmon        | 215.84626 | 76.295692 | 0.9955058 | 0.00036142 | 28.204 |
| NA | red           | 962.96654 | 122.24248 | 0.9899629 | 0.00120529 | 7.74   |
| NA | darkgreen     | 151.4862  | 15.246882 | 0.6929133 | 0.19459533 | 3.998  |
| NA | blue          | 592.35664 | 128.18375 | 0.9613562 | 0.00906609 | 5.538  |
| NA | darkturquoise | 147.69566 | 36.889349 | 0.9360152 | 0.01924137 | 71.476 |
| NA | royalblue     | 434.26891 | 53.058148 | 0.9578289 | 0.01032974 | 14.328 |
| NA | darkgreen     | 204.94062 | 37.607643 | 0.9544543 | 0.01158818 | 25.95  |
| NA | navy          | 192.48254 | 33.510739 | 0.9109952 | 0.03144626 | 37.466 |
| NA | lightcyan     | 154.98391 | 28.921106 | 0.7954046 | 0.10761649 | 0.522  |
| NA | pink          | 980.96181 | 142.572   | 0.9892976 | 0.00132696 | 4.81   |
| NA | paleturquoise | 180.53407 | 26.713806 | 0.9790043 | 0.00364047 | 24.868 |
| NA | paleturquoise | 171.8646  | 21.381171 | 0.9119092 | 0.03096749 | 18.622 |
| NA | purple        | 306.74077 | 74.582537 | 0.9821017 | 0.0028667  | 60.938 |
| NA | white         | 875.76124 | 46.883784 | 0.9679744 | 0.00684671 | 2.49   |
| NA | red           | 891.7913  | 127.4722  | 0.9990665 | 3.42E-05   | 10.792 |
| NA | black         | 741.9391  | 105.50406 | 0.993237  | 0.00066697 | 9.492  |
| NA | red           | 932.31159 | 125.90103 | 0.9961963 | 0.00028145 | 3.604  |
| NA | pink          | 894.62975 | 149.62591 | 0.9996875 | 6.63E-06   | 1.796  |
| NA | darkorange    | 159.86962 | 27.421918 | 0.9366625 | 0.01895204 | 12.94  |
| NA | salmon        | 239.59776 | 71.398444 | 0.9791008 | 0.00361545 | 22.114 |
| NA | greenyellow   | 184.92012 | 36.620845 | 0.9621334 | 0.00879499 | 15.412 |
| NA | turquoise     | 289.19603 | 96.139714 | 0.6981039 | 0.18984668 | 6.594  |
| NA | lightcyan     | 629.37945 | 51.328081 | 0.9402918 | 0.01735628 | 35.848 |
| NA | purple        | 241.85184 | 52.886714 | 0.9071963 | 0.03346124 | 24.142 |
| NA | tan           | 376.82751 | 25.871309 | 0.7943882 | 0.10840174 | 16.828 |
| NA | midnightblue  | 987.15869 | 74.398311 | 0.9868691 | 0.00180268 | 14.92  |
| NA | pink          | 958.53379 | 145.39051 | 0.9935003 | 0.00062842 | 6.636  |
| NA | lightcyan     | 563.12054 | 53.607229 | 0.9569909 | 0.01063783 | 6.014  |
| NA | magenta       | 466.45873 | 70.096844 | 0.9415526 | 0.01681269 | 3.834  |
| NA | grey60        | 285.98775 | 61.385662 | 0.9743038 | 0.00492556 | 13.388 |
| NA | purple        | 285.005   | 78.842497 | 0.9964543 | 0.00025331 | 8.93   |
| NA | brown         | 714.38308 | 135.80107 | 0.9960226 | 0.00030093 | 20.036 |

|    |               |           |           |           |            |         |
|----|---------------|-----------|-----------|-----------|------------|---------|
| NA | black         | 896.24548 | 104.30595 | 0.9898535 | 0.00122503 | 2.084   |
| NA | violet        | 883.19289 | 46.68497  | 0.991519  | 0.00093637 | 3.698   |
| NA | turquoise     | 954.12282 | 202.26967 | 0.9225462 | 0.02557333 | 6.952   |
| NA | turquoise     | 903.89131 | 210.18828 | 0.9503436 | 0.01318364 | 1.076   |
| NA | pink          | 915.45441 | 146.30619 | 0.995     | 0.0004241  | 4.044   |
| NA | pink          | 927.31643 | 148.27467 | 0.9977018 | 0.00013221 | 3.414   |
| NA | pink          | 908.09749 | 149.57467 | 0.9995979 | 9.68E-06   | 9.938   |
| NA | pink          | 928.4587  | 148.15552 | 0.9975308 | 0.00014723 | 3.286   |
| NA | turquoise     | 880.75695 | 214.97744 | 0.9551806 | 0.01131334 | 2.758   |
| NA | red           | 894.62975 | 127.58416 | 0.9992509 | 2.46E-05   | 1.926   |
| NA | violet        | 151.51666 | 8.381195  | 0.500131  | 0.39085777 | 12.766  |
| NA | turquoise     | 917.73546 | 223.95079 | 0.9778254 | 0.00395064 | 1.482   |
| NA | white         | 931.45784 | 42.829634 | 0.9797776 | 0.0034416  | 2.266   |
| NA | red           | 937.17013 | 126.31037 | 0.9969155 | 0.00020554 | 5.588   |
| NA | grey60        | 299.74079 | 65.44283  | 0.9879308 | 0.00158877 | 85.844  |
| NA | magenta       | 459.99118 | 72.897982 | 0.9508734 | 0.01297427 | 52.122  |
| NA | darkturquoise | 98.319966 | 17.604933 | 0.7666357 | 0.13048676 | 69.328  |
| NA | yellow        | 210.30197 | 97.10964  | 0.9220485 | 0.0258182  | 93.966  |
| NA | magenta       | 515.47542 | 59.519772 | 0.8995221 | 0.03765162 | 12.226  |
| NA | purple        | 281.40472 | 71.973988 | 0.9740666 | 0.00499375 | 4.432   |
| NA | darkred       | 213.94143 | 45.585517 | 0.9860086 | 0.00198249 | 4.026   |
| NA | greenyellow   | 72.689673 | 6.39547   | 0.3658272 | 0.54482284 | 42.484  |
| NA | pink          | 895.15131 | 149.32515 | 0.9992845 | 2.30E-05   | 9.284   |
| NA | tan           | 109.1342  | 18.229684 | 0.7107542 | 0.17841475 | 3.104   |
| NA | violet        | 871.29275 | 46.883929 | 0.996282  | 0.000272   | 2.106   |
| NA | violet        | 86.528585 | 2.9296746 | 0.3166824 | 0.60363216 | 6.654   |
| NA | purple        | 281.46817 | 77.301682 | 0.9912534 | 0.00098066 | 38.982  |
| NA | turquoise     | 161.57762 | 61.79635  | 0.6480912 | 0.23692373 | 1.138   |
| NA | turquoise     | 260.83581 | 55.835059 | -0.182677 | 0.76870859 | 17.074  |
| NA | turquoise     | 329.43043 | 61.220324 | -0.09055  | 0.88486597 | 10.114  |
| NA | darkgreen     | 265.56117 | 41.962099 | 0.9915228 | 0.00093575 | 111.738 |

---

Table S2-3 Attributes of genes in all modules of LT prenatal.

| GeneSymbol                      | Module    | kTotal    | kWithin   | eigencorr | eigenpval  | meanExpr |
|---------------------------------|-----------|-----------|-----------|-----------|------------|----------|
| gi 194033493 ref XM_001924291.1 | turquoise | 1054.6642 | 1007.8911 | 0.998818  | 4.88E-05   | 51.704   |
| gnl UG Ssc#S23765833            | turquoise | 1054.441  | 1012.4636 | 0.999748  | 4.80E-06   | 0.998    |
| gnl UG Ssc#S17516362            | turquoise | 1054.1549 | 1011.1127 | 0.999521  | 1.26E-05   | 16.744   |
| gnl UG Ssc#S40046162            | turquoise | 1053.7264 | 1013.4352 | 0.9999381 | 5.84E-07   | 5.98     |
| gnl UG Ssc#S40335794            | turquoise | 1053.7098 | 1013.1976 | 0.9998576 | 2.04E-06   | 2.51     |
| gnl UG Ssc#S40429630            | turquoise | 1053.4764 | 1013.5268 | 0.9999022 | 1.16E-06   | 6.172    |
| gnl UG Ssc#S40003133            | turquoise | 1053.4395 | 1013.316  | 0.9998675 | 1.83E-06   | 1.82     |
| gnl UG Ssc#S40207636            | turquoise | 1053.3004 | 1008.1965 | 0.998927  | 4.22E-05   | 8.352    |
| gnl UG Ssc#S18554195            | turquoise | 1052.9716 | 1011.8657 | 0.9995056 | 1.32E-05   | 226.234  |
| gnl UG Ssc#S31113730            | turquoise | 1052.7768 | 1012.268  | 0.9996412 | 8.16E-06   | 6.196    |
| gi 115551932 dbj AK236339.1     | turquoise | 1052.6329 | 1011.1703 | 0.9993167 | 2.14E-05   | 83.81    |
| gi 194044495 ref XM_001929295.1 | turquoise | 1052.5896 | 1006.1068 | 0.9984421 | 7.38E-05   | 6.63     |
| gi 115550899 dbj AK238760.1     | turquoise | 1052.4197 | 1003.0932 | 0.9976686 | 0.00013509 | 34.748   |
| gi 115555134 dbj AK240334.1     | turquoise | 1051.8734 | 1012.6715 | 0.9997064 | 6.04E-06   | 7.064    |
| gnl UG Ssc#S40091110            | turquoise | 1051.5297 | 1009.5922 | 0.9989343 | 4.18E-05   | 25.186   |
| gi 115554410 dbj AK233420.1     | turquoise | 1051.5215 | 1006.4645 | 0.998367  | 7.92E-05   | 121.846  |
| gnl UG Ssc#S18361249            | turquoise | 1051.4461 | 1012.6394 | 0.999701  | 6.21E-06   | 6.734    |
| gnl UG Ssc#S35328709            | turquoise | 1051.4384 | 1006.2958 | 0.9983694 | 7.90E-05   | 10.282   |
| gi 115548982 dbj AK238171.1     | turquoise | 1051.3525 | 1011.929  | 0.999516  | 1.28E-05   | 29.864   |
| gi 115550091 dbj AK232326.1     | turquoise | 1051.2964 | 1012.4102 | 0.9995577 | 1.12E-05   | 16.728   |
| gi 194037715 ref XM_001927280.1 | turquoise | 1051.1837 | 1006.769  | 0.9983712 | 7.89E-05   | 40.156   |
| gi 115548514 dbj AK235131.1     | turquoise | 1051.0373 | 1000.9548 | 0.9971477 | 0.00018278 | 82.9     |
| gnl UG Ssc#S34516266            | turquoise | 1050.7433 | 999.61157 | 0.9969206 | 0.00020503 | 50.498   |
| gi 194038523 ref XM_001928961.1 | turquoise | 1050.6596 | 1011.6022 | 0.9993118 | 2.17E-05   | 14.154   |
| gnl UG Ssc#S26401464            | turquoise | 1050.6548 | 1009.6883 | 0.9989135 | 4.30E-05   | 12.976   |
| gnl UG Ssc#S19547504            | turquoise | 1050.3592 | 1007.2876 | 0.9984115 | 7.60E-05   | 48.652   |
| gi 194036256 ref XM_001929662.1 | turquoise | 1050.2019 | 1010.3364 | 0.9990896 | 3.30E-05   | 10.146   |
| gnl UG Ssc#S40330262            | turquoise | 1050.099  | 1013.0316 | 0.9996175 | 8.98E-06   | 36.796   |
| gnl UG Ssc#S27600517            | turquoise | 1049.877  | 999.96308 | 0.9971429 | 0.00018325 | 76.636   |
| gi 115552369 dbj AK236374.1     | turquoise | 1049.7518 | 1003.3503 | 0.9979219 | 0.00011368 | 38.648   |
| gi 115549428 dbj AK235450.1     | turquoise | 1049.0197 | 1000.099  | 0.9968576 | 0.00021136 | 252.93   |
| gi 115545523 dbj AK230638.1     | turquoise | 1049.0183 | 1001.3638 | 0.9971532 | 0.00018226 | 10.756   |
| gnl UG Ssc#S27602031            | turquoise | 1048.9169 | 1011.3671 | 0.9992398 | 2.52E-05   | 9.856    |
| gnl UG Ssc#S39797758            | turquoise | 1048.8885 | 996.17809 | 0.9960901 | 0.00029331 | 12.398   |
| gnl UG Ssc#S40097724            | turquoise | 1048.711  | 1008.1287 | 0.9985528 | 6.61E-05   | 5.368    |
| gnl UG Ssc#S19539677            | turquoise | 1048.593  | 1005.1164 | 0.997871  | 0.00011789 | 57.64    |
| gi 194036903 ref XM_001927877.1 | turquoise | 1048.5737 | 1010.8482 | 0.9991494 | 2.98E-05   | 3.626    |
| gnl UG Ssc#S40471679            | turquoise | 1048.2008 | 1008.5187 | 0.9986393 | 6.02E-05   | 7.528    |
| gnl UG Ssc#S23695825            | turquoise | 1047.9085 | 999.24506 | 0.9968337 | 0.00021377 | 36.45    |
| gnl UG Ssc#S40476333            | turquoise | 1047.9025 | 996.53714 | 0.9960561 | 0.00029714 | 128.712  |
| gi 178056566 ref NM_001123160.1 | turquoise | 1047.87   | 998.04402 | 0.9966684 | 0.00023073 | 45.34    |
| gnl UG Ssc#S39842447            | turquoise | 1047.87   | 1002.1019 | 0.9972445 | 0.00017357 | 399.278  |
| gnl UG Ssc#S23768479            | turquoise | 1047.6043 | 999.95687 | 0.9968363 | 0.00021351 | 11.356   |
| gnl UG Ssc#S17511420            | turquoise | 1047.5625 | 993.38915 | 0.9954697 | 0.00036578 | 14.598   |
| gnl UG Ssc#S40087890            | turquoise | 1047.5427 | 1011.9636 | 0.9992968 | 2.24E-05   | 2.496    |
| gnl UG Ssc#S31122178            | turquoise | 1047.375  | 1010.1845 | 0.9988975 | 4.39E-05   | 5.284    |



|                                 |           |           |           |           |            |         |
|---------------------------------|-----------|-----------|-----------|-----------|------------|---------|
| gnl UG Ssc#S6077926             | turquoise | 1047.2688 | 1011.8309 | 0.9992564 | 2.43E-05   | 6.088   |
| gnl UG Ssc#S38482401            | turquoise | 1046.9732 | 1010.3666 | 0.9990092 | 3.74E-05   | 3.344   |
| gi 194040422 ref XM_001929580.1 | turquoise | 1046.8919 | 1001.6103 | 0.9972324 | 0.0001747  | 198.746 |
| gnl UG Ssc#S31115449            | turquoise | 1046.7379 | 1007.6381 | 0.9983386 | 8.13E-05   | 3.542   |
| gnl UG Ssc#S23699804            | turquoise | 1046.7157 | 1007.4285 | 0.9982633 | 8.69E-05   | 18.056  |
| gi 115553457 dbj AK236660.1     | turquoise | 1046.5598 | 1005.5445 | 0.9982061 | 9.12E-05   | 37.81   |
| gnl UG Ssc#S26733295            | turquoise | 1046.4114 | 998.67228 | 0.9965247 | 0.00024581 | 7.662   |
| gnl UG Ssc#S17514753            | turquoise | 1046.3823 | 1007.4831 | 0.9983255 | 8.22E-05   | 40.788  |
| gi 115547162 dbj AK231217.1     | turquoise | 1046.3777 | 994.88866 | 0.9960211 | 0.00030111 | 11.298  |
| gnl UG Ssc#S31102648            | turquoise | 1046.1154 | 997.02954 | 0.9960843 | 0.00029397 | 5.23    |
| gi 115552819 dbj AK239413.1     | turquoise | 1046.1049 | 1008.305  | 0.9984513 | 7.31E-05   | 15.252  |
| gi 115550524 dbj AK232354.1     | turquoise | 1045.6186 | 996.05847 | 0.9959024 | 0.00031467 | 18.096  |
| gnl UG Ssc#S40443177            | turquoise | 1045.5362 | 1009.4609 | 0.9986609 | 5.88E-05   | 5.244   |
| gnl UG Ssc#S19541809            | turquoise | 1045.0865 | 1009.5276 | 0.9987019 | 5.61E-05   | 14.794  |
| gi 115554919 dbj AK233731.1     | turquoise | 1045.029  | 1001.3089 | 0.9969653 | 0.00020059 | 96.498  |
| gnl UG Ssc#S18557502            | turquoise | 1044.9576 | 1008.2748 | 0.9984324 | 7.45E-05   | 32.266  |
| gi 194039262 ref XM_001927034.1 | turquoise | 1044.9272 | 992.28068 | 0.9950259 | 0.0004208  | 7.186   |
| gi 115554167 dbj AK239962.1     | turquoise | 1044.9219 | 1006.6946 | 0.9981719 | 9.38E-05   | 5.008   |
| gi 47523819 ref NM_214382.1     | turquoise | 1044.7347 | 992.95986 | 0.9952497 | 0.00039274 | 38.16   |
| gnl UG Ssc#S18356022            | turquoise | 1044.4747 | 1008.0548 | 0.998321  | 8.26E-05   | 19.166  |
| gnl UG Ssc#S40483512            | turquoise | 1044.0601 | 1010.1035 | 0.9987808 | 5.11E-05   | 6.774   |
| gnl UG Ssc#S18357288            | turquoise | 1043.8846 | 992.65117 | 0.9951884 | 0.00040036 | 32.63   |
| gnl UG Ssc#S31133718            | turquoise | 1043.8708 | 1009.4244 | 0.9987173 | 5.51E-05   | 2.506   |
| gnl UG Ssc#S26728785            | turquoise | 1043.4889 | 994.38603 | 0.9954532 | 0.00036779 | 10.446  |
| gnl UG Ssc#S23760234            | turquoise | 1043.4407 | 992.6863  | 0.9950321 | 0.00042002 | 9.23    |
| gnl UG Ssc#S17526090            | turquoise | 1043.3022 | 1009.6315 | 0.9986144 | 6.19E-05   | 3.038   |
| gnl UG Ssc#S18386392            | turquoise | 1043.2916 | 994.67235 | 0.9954824 | 0.00036425 | 16.412  |
| gnl UG Ssc#S18557753            | turquoise | 1043.1762 | 1000.3943 | 0.9967202 | 0.00022536 | 17.164  |
| gnl UG Ssc#S17515524            | turquoise | 1043.1605 | 1008.6364 | 0.9984168 | 7.56E-05   | 4.052   |
| gnl UG Ssc#S18553622            | turquoise | 1043.1451 | 988.88632 | 0.9943162 | 0.00051395 | 42.66   |
| gnl UG Ssc#S19545946            | turquoise | 1043.1219 | 991.76905 | 0.9953233 | 0.00038366 | 1.638   |
| gi 115554282 dbj AK240077.1     | turquoise | 1042.8367 | 991.53397 | 0.9948147 | 0.00044788 | 201.248 |
| gi 115550817 dbj AK235892.1     | turquoise | 1042.6641 | 1008.4871 | 0.9984843 | 7.08E-05   | 43.424  |
| gnl UG Ssc#S18357333            | turquoise | 1042.3943 | 1005.371  | 0.9978943 | 0.00011596 | 15.246  |
| gi 47522661 ref NM_213911.1     | turquoise | 1042.3529 | 991.12455 | 0.9950022 | 0.00042381 | 308.788 |
| gi 115552213 dbj AK230522.1     | turquoise | 1042.2183 | 992.21108 | 0.9949966 | 0.00042452 | 14.592  |
| gi 115551630 dbj AK239094.1     | turquoise | 1042.2023 | 1008.2161 | 0.9982801 | 8.56E-05   | 38.442  |
| gnl UG Ssc#S17510766            | turquoise | 1042.0976 | 990.88303 | 0.9946168 | 0.00047375 | 18.444  |
| gnl UG Ssc#S18275000            | turquoise | 1041.9986 | 1006.8213 | 0.9980075 | 0.00010674 | 20.81   |
| gnl UG Ssc#S18554424            | turquoise | 1041.66   | 1007.4572 | 0.9982606 | 8.71E-05   | 8.7     |
| gnl UG Ssc#S17516685            | turquoise | 1041.3725 | 988.53144 | 0.9941268 | 0.00053984 | 15.596  |
| gnl UG Ssc#S39995335            | turquoise | 1041.3278 | 987.77974 | 0.9940466 | 0.00055093 | 25.332  |
| gi 115549536 dbj AK235558.1     | turquoise | 1041.1911 | 1001.5888 | 0.9969227 | 0.00020483 | 8.27    |
| gnl UG Ssc#S22272334            | turquoise | 1041.1451 | 1003.8308 | 0.9976291 | 0.00013853 | 31.76   |
| gnl UG Ssc#S21557354            | turquoise | 1040.9611 | 1006.7776 | 0.9979646 | 0.0001102  | 2.228   |
| gnl UG Ssc#S39995545            | turquoise | 1040.6067 | 1007.9272 | 0.9981356 | 9.66E-05   | 2.08    |
| gnl UG Ssc#S18556647            | turquoise | 1040.4762 | 1007.8573 | 0.9981511 | 9.54E-05   | 5.912   |
| gnl UG Ssc#S26733687            | turquoise | 1040.4576 | 1000.4411 | 0.99719   | 0.00017873 | 55.334  |

|                                 |           |           |           |           |            |         |
|---------------------------------|-----------|-----------|-----------|-----------|------------|---------|
| gnl UG Ssc#S18382745            | turquoise | 1040.2677 | 1006.6829 | 0.9978953 | 0.00011587 | 27.63   |
| gnl UG Ssc#S19549265            | turquoise | 1040.1888 | 1007.7719 | 0.9981063 | 9.89E-05   | 11.768  |
| gnl UG Ssc#S40301371            | turquoise | 1040.1568 | 998.53831 | 0.9963813 | 0.00026117 | 16.106  |
| gnl UG Ssc#S31134253            | turquoise | 1040.0686 | 1003.618  | 0.9973679 | 0.00016204 | 33.014  |
| gi 50979292 ref NM_213742.1     | turquoise | 1039.9973 | 1004.6852 | 0.9977592 | 0.00012729 | 3.702   |
| gnl UG Ssc#S6040545             | turquoise | 1039.8737 | 981.30481 | 0.9924973 | 0.00077923 | 16.344  |
| gnl UG Ssc#S6048475             | turquoise | 1039.7948 | 999.16475 | 0.9964974 | 0.00024871 | 14.848  |
| gi 115550332 dbj AK238597.1     | turquoise | 1039.5775 | 990.24474 | 0.9943558 | 0.00050859 | 160.174 |
| gnl UG Ssc#S6073842             | turquoise | 1039.5085 | 981.64683 | 0.9926006 | 0.00076321 | 5.114   |
| gi 115553187 dbj AK232985.1     | turquoise | 1039.3394 | 993.39788 | 0.9951362 | 0.00040689 | 12.92   |
| gnl UG Ssc#S26724557            | turquoise | 1039.3306 | 1002.1288 | 0.997413  | 0.00015789 | 14.22   |
| gnl UG Ssc#S40482424            | turquoise | 1039.2698 | 1004.3842 | 0.9973158 | 0.00016687 | 43.88   |
| gi 47523353 ref NM_213741.1     | turquoise | 1039.2468 | 994.23295 | 0.99549   | 0.00036333 | 8.126   |
| gnl UG Ssc#S40068231            | turquoise | 1038.9434 | 1006.8841 | 0.9978678 | 0.00011815 | 16.324  |
| gnl UG Ssc#S23696666            | turquoise | 1038.8517 | 991.4022  | 0.9945691 | 0.00048006 | 50.696  |
| gi 115550795 dbj AK235870.1     | turquoise | 1038.6271 | 1005.7963 | 0.997619  | 0.00013942 | 14.938  |
| gi 194037164 ref XM_001928669.1 | turquoise | 1038.1715 | 1006.2884 | 0.9976827 | 0.00013386 | 9.404   |
| gnl UG Ssc#S39804944            | turquoise | 1038.0107 | 1001.5627 | 0.9966576 | 0.00023185 | 6.562   |
| gi 194040165 ref XM_001929121.1 | turquoise | 1037.8778 | 1002.8356 | 0.9972042 | 0.00017739 | 3.008   |
| gnl UG Ssc#S23697383            | turquoise | 1037.6854 | 1006.006  | 0.9976379 | 0.00013776 | 41.374  |
| gnl UG Ssc#S18386777            | turquoise | 1037.4852 | 1002.3606 | 0.9968293 | 0.00021422 | 7.386   |
| gnl UG Ssc#S27601215            | turquoise | 1037.3875 | 977.33897 | 0.9915953 | 0.00092378 | 39.3    |
| gnl UG Ssc#S19539303            | turquoise | 1037.1417 | 1005.0537 | 0.9973528 | 0.00016343 | 8.092   |
| gnl UG Ssc#S18555039            | turquoise | 1037.1277 | 999.14164 | 0.99675   | 0.0002223  | 38.046  |
| gnl UG Ssc#S18557168            | turquoise | 1036.8709 | 990.22665 | 0.9942707 | 0.00052013 | 10.284  |
| gnl UG Ssc#S40336522            | turquoise | 1036.6726 | 1005.2117 | 0.9973628 | 0.00016251 | 4.652   |
| gnl UG Ssc#S18550631            | turquoise | 1036.465  | 1005.0956 | 0.9973562 | 0.00016312 | 1.702   |
| gi 194035753 ref XM_001927135.1 | turquoise | 1035.5809 | 997.51498 | 0.9957194 | 0.00033598 | 68.604  |
| gnl UG Ssc#S41446009            | turquoise | 1035.5387 | 992.82383 | 0.995116  | 0.00040943 | 32.84   |
| gnl UG Ssc#S6003000             | turquoise | 1035.3178 | 1004.2762 | 0.997133  | 0.0001842  | 3.676   |
| gi 115549078 dbj AK238267.1     | turquoise | 1035.3171 | 998.62318 | 0.9964904 | 0.00024945 | 25.792  |
| gnl UG Ssc#S40564541            | turquoise | 1035.2625 | 996.73697 | 0.9956553 | 0.00034355 | 25.454  |
| gnl UG Ssc#S39984038            | turquoise | 1035.1268 | 1001.5266 | 0.9965502 | 0.00024311 | 102.004 |
| gnl UG Ssc#S40154544            | turquoise | 1034.9553 | 985.68694 | 0.9940923 | 0.0005446  | 156.742 |
| gnl UG Ssc#S23691825            | turquoise | 1034.9521 | 1003.8144 | 0.9969985 | 0.00019731 | 3.154   |
| gi 194041507 ref XM_001924700.1 | turquoise | 1034.8869 | 1003.7239 | 0.9969838 | 0.00019876 | 61.802  |
| gnl UG Ssc#S26718597            | turquoise | 1034.8823 | 1002.1597 | 0.9966352 | 0.00023418 | 65.77   |
| gnl UG Ssc#S23695118            | turquoise | 1034.8133 | 1003.7841 | 0.9970411 | 0.00019312 | 23.12   |
| gnl UG Ssc#S23756754            | turquoise | 1034.7835 | 993.35615 | 0.995611  | 0.00034882 | 8.624   |
| gnl UG Ssc#S22281441            | turquoise | 1034.778  | 983.42192 | 0.9928463 | 0.00072554 | 132.862 |
| gi 115545900 dbj AK234333.1     | turquoise | 1034.7399 | 973.33951 | 0.990694  | 0.00107614 | 55.392  |
| gnl UG Ssc#S40156654            | turquoise | 1034.6616 | 1000.6071 | 0.9965334 | 0.00024488 | 4.978   |
| gi 55741850 ref NM_001001264.1  | turquoise | 1034.4724 | 1003.6642 | 0.9969667 | 0.00020045 | 1.906   |
| gnl UG Ssc#S40105175            | turquoise | 1034.4724 | 1003.6642 | 0.9969667 | 0.00020045 | 1.906   |
| gnl UG Ssc#S40441928            | turquoise | 1034.4222 | 1003.6276 | 0.9969568 | 0.00020143 | 2.892   |
| gi 115547290 dbj AK234663.1     | turquoise | 1034.2827 | 1003.6608 | 0.996949  | 0.00020221 | 13.654  |
| gnl UG Ssc#S40466766            | turquoise | 1034.2606 | 1002.1841 | 0.996661  | 0.00023149 | 8.946   |
| gnl UG Ssc#S23775512            | turquoise | 1034.0485 | 1003.0172 | 0.9968072 | 0.00021646 | 3.132   |

|                                 |           |           |           |           |            |         |
|---------------------------------|-----------|-----------|-----------|-----------|------------|---------|
| gnl UG Ssc#S18557525            | turquoise | 1034.0341 | 1001.1111 | 0.9964268 | 0.00025627 | 37.862  |
| gnl UG Ssc#S19540920            | turquoise | 1033.9025 | 1003.2479 | 0.9968539 | 0.00021173 | 1.972   |
| gnl UG Ssc#S23699362            | turquoise | 1033.7281 | 1001.4832 | 0.9964477 | 0.00025402 | 6.514   |
| gnl UG Ssc#S26720557            | turquoise | 1033.5266 | 994.16235 | 0.995177  | 0.00040179 | 45.982  |
| gnl UG Ssc#S35331378            | turquoise | 1033.4796 | 995.76404 | 0.9956238 | 0.00034729 | 4.694   |
| gi 194034150 ref XM_001927070.1 | turquoise | 1033.3378 | 973.22522 | 0.9905238 | 0.00110578 | 4.42    |
| gi 115547124 dbj AK231179.1     | turquoise | 1033.3044 | 989.24903 | 0.9941937 | 0.00053065 | 41.33   |
| gnl UG Ssc#S17525302            | turquoise | 1032.899  | 989.88479 | 0.9940264 | 0.00055374 | 4.242   |
| gnl UG Ssc#S40094925            | turquoise | 1032.844  | 996.39683 | 0.9958321 | 0.0003228  | 3.336   |
| gnl UG Ssc#S18358611            | turquoise | 1032.7838 | 1000.9431 | 0.9962882 | 0.00027131 | 4.412   |
| gnl UG Ssc#S19546309            | turquoise | 1032.7447 | 1001.2697 | 0.9966274 | 0.000235   | 12.138  |
| gnl UG Ssc#S23689871            | turquoise | 1032.7211 | 982.76645 | 0.9928786 | 0.00072064 | 6.17    |
| gnl UG Ssc#S40570043            | turquoise | 1032.6054 | 995.14494 | 0.9954142 | 0.00037253 | 26.232  |
| gi 194043626 ref XM_001926661.1 | turquoise | 1032.4377 | 978.61556 | 0.9916015 | 0.00092277 | 17.014  |
| gi 115553166 dbj AK232966.1     | turquoise | 1032.3069 | 980.35025 | 0.9922239 | 0.00082219 | 16.99   |
| gnl UG Ssc#S34516476            | turquoise | 1032.26   | 970.65311 | 0.9901332 | 0.00117477 | 7.04    |
| gi 172073149 ref NM_001122990.1 | turquoise | 1032.2513 | 998.38128 | 0.9957373 | 0.00033387 | 38.594  |
| gnl UG Ssc#S40482883            | turquoise | 1031.929  | 995.51944 | 0.9954167 | 0.00037222 | 37.47   |
| gi 194039715 ref XM_001925448.1 | turquoise | 1031.9114 | 997.35607 | 0.9958074 | 0.00032568 | 71.254  |
| gnl UG Ssc#S19550112            | turquoise | 1031.7493 | 999.23767 | 0.995978  | 0.00030601 | 2.98    |
| gnl UG Ssc#S18555986            | turquoise | 1031.712  | 999.25586 | 0.9958996 | 0.00031499 | 15.754  |
| gi 115553137 dbj AK239723.1     | turquoise | 1031.4721 | 998.93812 | 0.9958177 | 0.00032448 | 91.154  |
| gi 52351441 gb AY609871.1       | turquoise | 1031.2509 | 1001.1835 | 0.996291  | 0.000271   | 65.096  |
| gi 194041930 ref XM_001925953.1 | turquoise | 1031.1968 | 1001.2355 | 0.9963105 | 0.00026887 | 9.45    |
| gnl UG Ssc#S17526967            | turquoise | 1031.1728 | 999.54899 | 0.9961687 | 0.00028452 | 4.8     |
| gi 115554046 dbj AK233255.1     | turquoise | 1031.0101 | 1001.0945 | 0.9962725 | 0.00027303 | 2.378   |
| gi 47523129 ref NM_213866.1     | turquoise | 1031.0101 | 1001.0945 | 0.9962725 | 0.00027303 | 2.378   |
| gi 194037909 ref XM_001924188.1 | turquoise | 1030.7153 | 1000.1058 | 0.9960333 | 0.00029973 | 11.378  |
| gnl UG Ssc#S40471826            | turquoise | 1030.701  | 974.56946 | 0.9912836 | 0.0009756  | 26.016  |
| gi 209863048 ref NM_001135966.1 | turquoise | 1030.4662 | 995.73802 | 0.9953811 | 0.00037657 | 9.786   |
| gi 47523317 ref NM_213763.1     | turquoise | 1030.2587 | 1000.5689 | 0.9961237 | 0.00028954 | 152.592 |
| gnl UG Ssc#S39994161            | turquoise | 1030.2263 | 978.70708 | 0.9918516 | 0.00088189 | 18.004  |
| gnl UG Ssc#S39991071            | turquoise | 1029.9443 | 999.75142 | 0.9960829 | 0.00029412 | 5.43    |
| gnl UG Ssc#S23762974            | turquoise | 1029.7035 | 1000.1523 | 0.9960485 | 0.000298   | 22.174  |
| gnl UG Ssc#S23776942            | turquoise | 1029.591  | 997.64412 | 0.9958234 | 0.00032381 | 2.27    |
| gi 52351462 gb AY609892.1       | turquoise | 1029.3231 | 993.23296 | 0.9946851 | 0.00046476 | 60.926  |
| gi 194038456 ref XM_001928767.1 | turquoise | 1029.2684 | 968.8189  | 0.9893759 | 0.00131245 | 45.028  |
| gi 115545921 dbj AK237362.1     | turquoise | 1029.2641 | 970.84908 | 0.9898799 | 0.00122025 | 71.51   |
| gi 115548519 dbj AK235136.1     | turquoise | 1029.123  | 998.04235 | 0.9957486 | 0.00033255 | 5.502   |
| gi 115550982 dbj AK238843.1     | turquoise | 1028.9194 | 975.45271 | 0.9916069 | 0.00092188 | 41.808  |
| gnl UG Ssc#S18382407            | turquoise | 1028.8379 | 999.53834 | 0.9958419 | 0.00032167 | 28.016  |
| gnl UG Ssc#S40479246            | turquoise | 1028.5451 | 981.25719 | 0.9923316 | 0.00080518 | 24.002  |
| gi 194038818 ref XM_001924413.1 | turquoise | 1028.5372 | 998.24502 | 0.9955336 | 0.00035808 | 27.472  |
| gnl UG Ssc#S18353913            | turquoise | 1028.284  | 993.2345  | 0.9948395 | 0.00044467 | 18.186  |
| gnl UG Ssc#S23696834            | turquoise | 1027.936  | 997.78642 | 0.9954366 | 0.00036981 | 27.472  |
| gi 194043187 ref XM_001925978.1 | turquoise | 1027.4563 | 967.06461 | 0.9890593 | 0.00137148 | 43.618  |
| gi 115553331 dbj AK233129.1     | turquoise | 1027.4029 | 997.49432 | 0.9953423 | 0.00038131 | 4.174   |
| gnl UG Ssc#S18556629            | turquoise | 1027.1451 | 997.5647  | 0.9953572 | 0.0003795  | 6.568   |

|                                 |           |           |           |           |            |        |
|---------------------------------|-----------|-----------|-----------|-----------|------------|--------|
| gi 115546268 dbj AK240506.1     | turquoise | 1026.9669 | 997.8583  | 0.9954013 | 0.0003741  | 20.668 |
| gnl UG Ssc#S40156252            | turquoise | 1026.8334 | 990.289   | 0.9944282 | 0.00049884 | 7.922  |
| gnl UG Ssc#S17513916            | turquoise | 1026.5003 | 997.62191 | 0.9953409 | 0.00038149 | 15.512 |
| gi 194034095 ref XM_001928221.1 | turquoise | 1026.3605 | 997.16876 | 0.9953549 | 0.00037977 | 2.048  |
| gnl UG Ssc#S23764348            | turquoise | 1026.3198 | 997.48045 | 0.9953031 | 0.00038615 | 5.26   |
| gi 115548409 dbj AK235026.1     | turquoise | 1026.2641 | 979.54218 | 0.9921598 | 0.00083237 | 50.956 |
| gnl UG Ssc#S18549522            | turquoise | 1026.0318 | 973.84372 | 0.9905859 | 0.00109494 | 12.954 |
| gi 115555541 dbj AK237173.1     | turquoise | 1025.5851 | 977.9242  | 0.9923291 | 0.00080557 | 56.726 |
| gi 115547984 dbj AK237968.1     | turquoise | 1025.5542 | 996.97966 | 0.9951566 | 0.00040434 | 11.098 |
| gi 115552285 dbj AK230594.1     | turquoise | 1025.2226 | 990.34461 | 0.9940561 | 0.00054961 | 3.838  |
| gi 115552399 dbj AK236404.1     | turquoise | 1025.163  | 965.44177 | 0.9886263 | 0.00145359 | 41.906 |
| gnl UG Ssc#S40110625            | turquoise | 1024.9446 | 993.72575 | 0.9949055 | 0.00043618 | 24.14  |
| gnl UG Ssc#S17511933            | turquoise | 1024.8598 | 994.91091 | 0.9946809 | 0.00046532 | 12.394 |
| gi 115553811 dbj AK236816.1     | turquoise | 1024.497  | 982.65347 | 0.9925527 | 0.00077064 | 16.782 |
| gnl UG Ssc#S31114563            | turquoise | 1024.3034 | 985.62899 | 0.99353   | 0.00062412 | 10.15  |
| gnl UG Ssc#S15981318            | turquoise | 1024.2116 | 995.81528 | 0.9948582 | 0.00044226 | 4.342  |
| gnl UG Ssc#S39985763            | turquoise | 1024.2116 | 995.81528 | 0.9948582 | 0.00044226 | 4.342  |
| gnl UG Ssc#S40106146            | turquoise | 1024.2067 | 991.90546 | 0.9942466 | 0.00052342 | 43.906 |
| gi 52351111 gb AY609516.1       | turquoise | 1023.9811 | 995.54487 | 0.9947703 | 0.00045364 | 27.104 |
| gnl UG Ssc#S17524953            | turquoise | 1023.9475 | 994.37466 | 0.9945688 | 0.00048009 | 76.426 |
| gnl UG Ssc#S17518818            | turquoise | 1023.7604 | 992.67748 | 0.9941693 | 0.00053399 | 4.038  |
| gnl UG Ssc#S18274330            | turquoise | 1023.2561 | 993.6562  | 0.994349  | 0.00050951 | 6.422  |
| gi 165973437 ref NM_001113701.1 | turquoise | 1023.1638 | 993.47916 | 0.9945116 | 0.00048768 | 9.342  |
| gi 194044921 ref XM_001927440.1 | turquoise | 1022.9989 | 959.83669 | 0.9874482 | 0.0016849  | 32.732 |
| gi 115550165 dbj AK235644.1     | turquoise | 1022.9092 | 991.45755 | 0.9941631 | 0.00053484 | 86.814 |
| gnl UG Ssc#S6666043             | turquoise | 1022.9027 | 978.95931 | 0.9913228 | 0.00096904 | 15.196 |
| gnl UG Ssc#S40158599            | turquoise | 1022.8611 | 993.09293 | 0.9945074 | 0.00048825 | 20.512 |
| gi 194043388 ref XM_001929537.1 | turquoise | 1022.7044 | 980.40933 | 0.991994  | 0.00085889 | 27.896 |
| gi 115553090 dbj AK239676.1     | turquoise | 1022.5823 | 972.91192 | 0.9904545 | 0.00111792 | 31.068 |
| gi 194034719 ref XM_001925911.1 | turquoise | 1022.0444 | 993.96877 | 0.99444   | 0.00049726 | 7.748  |
| gi 194044800 ref XM_001924191.1 | turquoise | 1021.7498 | 971.64151 | 0.9900222 | 0.00119463 | 33.86  |
| gnl UG Ssc#S19549069            | turquoise | 1021.6244 | 993.7427  | 0.9943055 | 0.0005154  | 18.71  |
| gnl UG Ssc#S18382205            | turquoise | 1021.3124 | 992.24336 | 0.9940312 | 0.00055306 | 7.754  |
| gi 115547856 dbj AK234832.1     | turquoise | 1021.1391 | 959.51591 | 0.9874148 | 0.00169163 | 81.33  |
| gnl UG Ssc#S6027323             | turquoise | 1021.0915 | 993.27409 | 0.9941673 | 0.00053427 | 4.494  |
| gnl UG Ssc#S23699793            | turquoise | 1021.0786 | 987.05432 | 0.9932511 | 0.00066488 | 25.238 |
| gnl UG Ssc#S18378622            | turquoise | 1020.885  | 993.04936 | 0.9941423 | 0.00053771 | 2.27   |
| gnl UG Ssc#S18383234            | turquoise | 1020.8841 | 975.71559 | 0.9909538 | 0.00103144 | 9.706  |
| gnl UG Ssc#S40102872            | turquoise | 1020.8806 | 993.14143 | 0.9941454 | 0.00053728 | 14.234 |
| gnl UG Ssc#S26735527            | turquoise | 1020.8786 | 988.65961 | 0.9934944 | 0.00062927 | 18.658 |
| gi 194040321 ref XM_001928400.1 | turquoise | 1020.7194 | 960.25684 | 0.9873424 | 0.00170623 | 32.332 |
| gnl UG Ssc#S17510761            | turquoise | 1020.6196 | 991.08732 | 0.9940142 | 0.00055543 | 3.844  |
| gnl UG Ssc#S18378125            | turquoise | 1020.5539 | 959.24192 | 0.9868046 | 0.00181596 | 11.296 |
| gi 115546238 dbj AK240476.1     | turquoise | 1020.5465 | 992.40067 | 0.9941309 | 0.00053927 | 7.646  |
| gnl UG Ssc#S34533546            | turquoise | 1020.4096 | 988.00663 | 0.9937137 | 0.00059775 | 14.986 |
| gi 194035880 ref XM_001929177.1 | turquoise | 1020.3462 | 992.76429 | 0.9940676 | 0.00054802 | 7.132  |
| gnl UG Ssc#S19548366            | turquoise | 1020.3079 | 991.66842 | 0.9937878 | 0.00058722 | 4.018  |
| gnl UG Ssc#S23695220            | turquoise | 1020.1021 | 968.28832 | 0.9896512 | 0.00126181 | 7.1    |

|                                 |           |           |           |           |            |         |
|---------------------------------|-----------|-----------|-----------|-----------|------------|---------|
| gi 194018691 ref NM_001129967.1 | turquoise | 1019.7917 | 984.41637 | 0.9927553 | 0.00073942 | 3.504   |
| gi 115546222 dbj AK240460.1     | turquoise | 1019.7733 | 990.93018 | 0.9937225 | 0.00059649 | 18.434  |
| gi 115552282 dbj AK230591.1     | turquoise | 1019.7543 | 984.31166 | 0.9931136 | 0.00068529 | 144.308 |
| gi 194041408 ref XM_001929007.1 | turquoise | 1019.7299 | 974.88114 | 0.9909338 | 0.00103486 | 1.626   |
| gi 115548230 dbj AK231444.1     | turquoise | 1019.6801 | 992.16006 | 0.9938692 | 0.00057572 | 22.828  |
| gnl UG Ssc#S18555480            | turquoise | 1019.6169 | 956.357   | 0.9861075 | 0.00196155 | 3.498   |
| gnl UG Ssc#S39987785            | turquoise | 1019.605  | 992.10494 | 0.9938695 | 0.00057568 | 9.146   |
| gi 194042943 ref XM_001929420.1 | turquoise | 1019.5814 | 973.73952 | 0.9906638 | 0.00108139 | 36.58   |
| gnl UG Ssc#S18359512            | turquoise | 1019.4816 | 990.82433 | 0.993897  | 0.00057182 | 7.834   |
| gnl UG Ssc#S31128707            | turquoise | 1019.4548 | 991.76031 | 0.9937797 | 0.00058837 | 3.574   |
| gnl UG Ssc#S40095449            | turquoise | 1019.1938 | 990.56331 | 0.9935104 | 0.00062696 | 7.732   |
| gi 52351898 gb AY610316.1       | turquoise | 1019.0944 | 991.56379 | 0.9937292 | 0.00059553 | 13.874  |
| gi 194044165 ref XM_001924403.1 | turquoise | 1018.8723 | 990.52899 | 0.9935485 | 0.00062145 | 4.262   |
| gnl UG Ssc#S40483452            | turquoise | 1018.7788 | 991.4407  | 0.9936789 | 0.00060271 | 11.952  |
| gnl UG Ssc#S17516197            | turquoise | 1018.7068 | 991.37132 | 0.9936743 | 0.00060337 | 11.582  |
| gnl UG Ssc#S18551640            | turquoise | 1018.6025 | 967.05071 | 0.9886549 | 0.00144813 | 12.45   |
| gnl UG Ssc#S17516715            | turquoise | 1018.5348 | 984.67984 | 0.9923004 | 0.00081009 | 3.69    |
| gnl UG Ssc#S18558244            | turquoise | 1018.5004 | 984.27424 | 0.9924808 | 0.0007818  | 4.382   |
| gnl UG Ssc#S38482329            | turquoise | 1018.4975 | 983.29776 | 0.9925352 | 0.00077335 | 43.534  |
| gi 194037369 ref XM_001925128.1 | turquoise | 1018.4453 | 975.91199 | 0.9907682 | 0.00106332 | 25.518  |
| gi 52352730 gb AY609650.1       | turquoise | 1018.4232 | 954.26628 | 0.9860137 | 0.00198142 | 39.142  |
| gnl UG Ssc#S16514926            | turquoise | 1018.3039 | 990.53807 | 0.9935022 | 0.00062814 | 6.36    |
| gnl UG Ssc#S6076069             | turquoise | 1018.0755 | 987.09185 | 0.9930257 | 0.00069843 | 3.306   |
| gnl UG Ssc#S17514582            | turquoise | 1018.0124 | 990.80209 | 0.9935229 | 0.00062514 | 14.56   |
| gi 61696631 gb AY803094.1       | turquoise | 1017.9713 | 985.78475 | 0.9927438 | 0.00074119 | 12.204  |
| gnl UG Ssc#S19541978            | turquoise | 1017.962  | 988.69281 | 0.9931235 | 0.00068381 | 8.3     |
| gnl UG Ssc#S31114805            | turquoise | 1017.713  | 986.10621 | 0.9926075 | 0.00076215 | 7.138   |
| gnl UG Ssc#S40235024            | turquoise | 1017.7102 | 951.81494 | 0.9851659 | 0.002164   | 34.016  |
| gnl UG Ssc#S40234755            | turquoise | 1017.6976 | 961.93228 | 0.9877829 | 0.00161803 | 4.824   |
| gnl UG Ssc#S40476889            | turquoise | 1017.4228 | 973.54687 | 0.9906209 | 0.00108884 | 24.82   |
| gi 194038889 ref XM_001928918.1 | turquoise | 1017.3845 | 977.04033 | 0.9911576 | 0.0009968  | 19.628  |
| gnl UG Ssc#S23699327            | turquoise | 1017.3006 | 979.72664 | 0.9923672 | 0.00079959 | 16.342  |
| gnl UG Ssc#S6010568             | turquoise | 1017.088  | 989.89882 | 0.9933715 | 0.00064718 | 4.626   |
| gnl UG Ssc#S18553917            | turquoise | 1017.0867 | 989.96694 | 0.9933698 | 0.00064743 | 5.37    |
| gi 115554452 dbj AK233462.1     | turquoise | 1016.9955 | 989.79088 | 0.9933479 | 0.00065064 | 24.05   |
| gnl UG Ssc#S18546780            | turquoise | 1016.6586 | 982.99872 | 0.9918482 | 0.00088244 | 28.666  |
| gi 48976128 ref NM_001001770.1  | turquoise | 1016.2809 | 964.59643 | 0.9878476 | 0.00160522 | 119.276 |
| gnl UG Ssc#S16769794            | turquoise | 1016.1949 | 989.21459 | 0.9931356 | 0.000682   | 4.562   |
| gnl UG Ssc#S40084984            | turquoise | 1015.8414 | 978.27249 | 0.9915371 | 0.00093338 | 6.046   |
| gi 115550169 dbj AK235648.1     | turquoise | 1015.8347 | 988.98932 | 0.9930476 | 0.00069515 | 73.526  |
| gi 51592144 ref NM_001004049.1  | turquoise | 1015.7883 | 988.61172 | 0.9929632 | 0.00070785 | 13.504  |
| gi 115547599 dbj AK231257.1     | turquoise | 1015.275  | 988.54136 | 0.9929221 | 0.00071406 | 5.008   |
| gi 153791726 ref NM_001099925.1 | turquoise | 1015.275  | 988.54136 | 0.9929221 | 0.00071406 | 1.828   |
| gi 155369755 ref NM_001101026.1 | turquoise | 1015.275  | 988.54136 | 0.9929221 | 0.00071406 | 1.15    |
| gi 164394 gb L10363.1 PIGBSP    | turquoise | 1015.275  | 988.54136 | 0.9929221 | 0.00071406 | 1.082   |
| gi 178056541 ref NM_001123177.1 | turquoise | 1015.275  | 988.54136 | 0.9929221 | 0.00071406 | 2.03    |
| gi 194033899 ref XM_001928651.1 | turquoise | 1015.275  | 988.54136 | 0.9929221 | 0.00071406 | 0.406   |
| gi 194034057 ref XM_001924352.1 | turquoise | 1015.275  | 988.54136 | 0.9929221 | 0.00071406 | 3.654   |

|                                 |           |          |           |           |            |        |
|---------------------------------|-----------|----------|-----------|-----------|------------|--------|
| gi 194034272 ref XM_001924582.1 | turquoise | 1015.275 | 988.54136 | 0.9929221 | 0.00071406 | 10.962 |
| gi 194037687 ref XM_001927351.1 | turquoise | 1015.275 | 988.54136 | 0.9929221 | 0.00071406 | 2.64   |
| gi 194037914 ref XM_001927045.1 | turquoise | 1015.275 | 988.54136 | 0.9929221 | 0.00071406 | 4.33   |
| gi 194040347 ref XM_001926869.1 | turquoise | 1015.275 | 988.54136 | 0.9929221 | 0.00071406 | 0.204  |
| gi 194041706 ref XM_001926955.1 | turquoise | 1015.275 | 988.54136 | 0.9929221 | 0.00071406 | 3.79   |
| gi 194041956 ref XM_001929320.1 | turquoise | 1015.275 | 988.54136 | 0.9929221 | 0.00071406 | 10.826 |
| gi 194043865 ref XM_001928489.1 | turquoise | 1015.275 | 988.54136 | 0.9929221 | 0.00071406 | 2.91   |
| gi 194044574 ref XM_001928737.1 | turquoise | 1015.275 | 988.54136 | 0.9929221 | 0.00071406 | 5.482  |
| gi 194045058 ref XM_001925649.1 | turquoise | 1015.275 | 988.54136 | 0.9929221 | 0.00071406 | 3.924  |
| gi 47523699 ref NM_214317.1     | turquoise | 1015.275 | 988.54136 | 0.9929221 | 0.00071406 | 0.474  |
| gi 47523911 ref NM_214427.1     | turquoise | 1015.275 | 988.54136 | 0.9929221 | 0.00071406 | 5.076  |
| gi 52351619 gb AY610049.1       | turquoise | 1015.275 | 988.54136 | 0.9929221 | 0.00071406 | 2.098  |
| gi 56711333 ref NM_213755.2     | turquoise | 1015.275 | 988.54136 | 0.9929221 | 0.00071406 | 7.308  |
| gi 59709497 ref NM_001012299.1  | turquoise | 1015.275 | 988.54136 | 0.9929221 | 0.00071406 | 7.512  |
| gi 61696660 gb AY803123.1       | turquoise | 1015.275 | 988.54136 | 0.9929221 | 0.00071406 | 6.158  |
| gnl UG Ssc#S14767272            | turquoise | 1015.275 | 988.54136 | 0.9929221 | 0.00071406 | 5.616  |
| gnl UG Ssc#S16761546            | turquoise | 1015.275 | 988.54136 | 0.9929221 | 0.00071406 | 1.76   |
| gnl UG Ssc#S16765575            | turquoise | 1015.275 | 988.54136 | 0.9929221 | 0.00071406 | 1.692  |
| gnl UG Ssc#S16769802            | turquoise | 1015.275 | 988.54136 | 0.9929221 | 0.00071406 | 2.368  |
| gnl UG Ssc#S16864702            | turquoise | 1015.275 | 988.54136 | 0.9929221 | 0.00071406 | 2.098  |
| gnl UG Ssc#S17513155            | turquoise | 1015.275 | 988.54136 | 0.9929221 | 0.00071406 | 2.03   |
| gnl UG Ssc#S17514665            | turquoise | 1015.275 | 988.54136 | 0.9929221 | 0.00071406 | 2.3    |
| gnl UG Ssc#S17526184            | turquoise | 1015.275 | 988.54136 | 0.9929221 | 0.00071406 | 18.474 |
| gnl UG Ssc#S17526944            | turquoise | 1015.275 | 988.54136 | 0.9929221 | 0.00071406 | 14.548 |
| gnl UG Ssc#S18381113            | turquoise | 1015.275 | 988.54136 | 0.9929221 | 0.00071406 | 3.586  |
| gnl UG Ssc#S18387120            | turquoise | 1015.275 | 988.54136 | 0.9929221 | 0.00071406 | 3.384  |
| gnl UG Ssc#S18546109            | turquoise | 1015.275 | 988.54136 | 0.9929221 | 0.00071406 | 3.518  |
| gnl UG Ssc#S18549381            | turquoise | 1015.275 | 988.54136 | 0.9929221 | 0.00071406 | 1.556  |
| gnl UG Ssc#S18549877            | turquoise | 1015.275 | 988.54136 | 0.9929221 | 0.00071406 | 9.068  |
| gnl UG Ssc#S18550181            | turquoise | 1015.275 | 988.54136 | 0.9929221 | 0.00071406 | 2.774  |
| gnl UG Ssc#S18554224            | turquoise | 1015.275 | 988.54136 | 0.9929221 | 0.00071406 | 2.572  |
| gnl UG Ssc#S18557364            | turquoise | 1015.275 | 988.54136 | 0.9929221 | 0.00071406 | 2.03   |
| gnl UG Ssc#S19538625            | turquoise | 1015.275 | 988.54136 | 0.9929221 | 0.00071406 | 1.692  |
| gnl UG Ssc#S19541682            | turquoise | 1015.275 | 988.54136 | 0.9929221 | 0.00071406 | 7.038  |
| gnl UG Ssc#S23691231            | turquoise | 1015.275 | 988.54136 | 0.9929221 | 0.00071406 | 2.234  |
| gnl UG Ssc#S23694918            | turquoise | 1015.275 | 988.54136 | 0.9929221 | 0.00071406 | 3.79   |
| gnl UG Ssc#S23757708            | turquoise | 1015.275 | 988.54136 | 0.9929221 | 0.00071406 | 2.842  |
| gnl UG Ssc#S23758306            | turquoise | 1015.275 | 988.54136 | 0.9929221 | 0.00071406 | 9.542  |
| gnl UG Ssc#S23766263            | turquoise | 1015.275 | 988.54136 | 0.9929221 | 0.00071406 | 1.76   |
| gnl UG Ssc#S26652967            | turquoise | 1015.275 | 988.54136 | 0.9929221 | 0.00071406 | 1.286  |
| gnl UG Ssc#S26720448            | turquoise | 1015.275 | 988.54136 | 0.9929221 | 0.00071406 | 2.098  |
| gnl UG Ssc#S26724210            | turquoise | 1015.275 | 988.54136 | 0.9929221 | 0.00071406 | 1.962  |
| gnl UG Ssc#S31103357            | turquoise | 1015.275 | 988.54136 | 0.9929221 | 0.00071406 | 28.556 |
| gnl UG Ssc#S31114631            | turquoise | 1015.275 | 988.54136 | 0.9929221 | 0.00071406 | 7.578  |
| gnl UG Ssc#S31116516            | turquoise | 1015.275 | 988.54136 | 0.9929221 | 0.00071406 | 1.894  |
| gnl UG Ssc#S31129032            | turquoise | 1015.275 | 988.54136 | 0.9929221 | 0.00071406 | 2.842  |
| gnl UG Ssc#S34510310            | turquoise | 1015.275 | 988.54136 | 0.9929221 | 0.00071406 | 4.128  |
| gnl UG Ssc#S34531531            | turquoise | 1015.275 | 988.54136 | 0.9929221 | 0.00071406 | 0.338  |

|                                 |           |           |           |           |            |         |
|---------------------------------|-----------|-----------|-----------|-----------|------------|---------|
| gnl UG Ssc#S39980686            | turquoise | 1015.275  | 988.54136 | 0.9929221 | 0.00071406 | 1.894   |
| gnl UG Ssc#S39984816            | turquoise | 1015.275  | 988.54136 | 0.9929221 | 0.00071406 | 1.894   |
| gnl UG Ssc#S39992206            | turquoise | 1015.275  | 988.54136 | 0.9929221 | 0.00071406 | 16.376  |
| gnl UG Ssc#S39993541            | turquoise | 1015.275  | 988.54136 | 0.9929221 | 0.00071406 | 2.978   |
| gnl UG Ssc#S39994288            | turquoise | 1015.275  | 988.54136 | 0.9929221 | 0.00071406 | 1.556   |
| gnl UG Ssc#S39995011            | turquoise | 1015.275  | 988.54136 | 0.9929221 | 0.00071406 | 4.128   |
| gnl UG Ssc#S39998520            | turquoise | 1015.275  | 988.54136 | 0.9929221 | 0.00071406 | 2.91    |
| gnl UG Ssc#S40074903            | turquoise | 1015.275  | 988.54136 | 0.9929221 | 0.00071406 | 1.556   |
| gnl UG Ssc#S40084501            | turquoise | 1015.275  | 988.54136 | 0.9929221 | 0.00071406 | 4.872   |
| gnl UG Ssc#S40086007            | turquoise | 1015.275  | 988.54136 | 0.9929221 | 0.00071406 | 9.27    |
| gnl UG Ssc#S40095231            | turquoise | 1015.275  | 988.54136 | 0.9929221 | 0.00071406 | 2.64    |
| gnl UG Ssc#S40098899            | turquoise | 1015.275  | 988.54136 | 0.9929221 | 0.00071406 | 2.774   |
| gnl UG Ssc#S40099212            | turquoise | 1015.275  | 988.54136 | 0.9929221 | 0.00071406 | 2.3     |
| gnl UG Ssc#S40103595            | turquoise | 1015.275  | 988.54136 | 0.9929221 | 0.00071406 | 1.76    |
| gnl UG Ssc#S40106548            | turquoise | 1015.275  | 988.54136 | 0.9929221 | 0.00071406 | 3.248   |
| gnl UG Ssc#S40295633            | turquoise | 1015.275  | 988.54136 | 0.9929221 | 0.00071406 | 1.556   |
| gnl UG Ssc#S40403544            | turquoise | 1015.275  | 988.54136 | 0.9929221 | 0.00071406 | 2.368   |
| gnl UG Ssc#S40546896            | turquoise | 1015.275  | 988.54136 | 0.9929221 | 0.00071406 | 1.828   |
| gnl UG Ssc#S41445227            | turquoise | 1015.275  | 988.54136 | 0.9929221 | 0.00071406 | 1.894   |
| gnl UG Ssc#S6001862             | turquoise | 1015.275  | 988.54136 | 0.9929221 | 0.00071406 | 1.76    |
| gnl UG Ssc#S6048273             | turquoise | 1015.275  | 988.54136 | 0.9929221 | 0.00071406 | 4.602   |
| gnl UG Ssc#S6053423             | turquoise | 1015.275  | 988.54136 | 0.9929221 | 0.00071406 | 3.858   |
| gnl UG Ssc#S26399010            | turquoise | 1015.2402 | 950.1229  | 0.9845278 | 0.0023049  | 22.07   |
| gi 115548328 dbj AK231701.1     | turquoise | 1014.9358 | 979.2921  | 0.9916846 | 0.00090912 | 46.906  |
| gnl UG Ssc#S39998988            | turquoise | 1014.7372 | 952.93659 | 0.9860678 | 0.00196995 | 886.026 |
| gi 194042143 ref XM_001927456.1 | turquoise | 1014.2742 | 980.58683 | 0.9918761 | 0.0008779  | 57.218  |
| gnl UG Ssc#S23689835            | turquoise | 1014.2474 | 945.67051 | 0.9835552 | 0.00252523 | 15.234  |
| gnl UG Ssc#S18554123            | turquoise | 1014.1711 | 985.20073 | 0.9923845 | 0.00079687 | 19.42   |
| gnl UG Ssc#S34531381            | turquoise | 1014.1633 | 986.13471 | 0.9925596 | 0.00076955 | 27.066  |
| gi 194033556 ref XM_001927696.1 | turquoise | 1014.1421 | 949.7876  | 0.9851482 | 0.00216786 | 31.658  |
| gnl UG Ssc#S40156624            | turquoise | 1013.8825 | 987.1189  | 0.9925436 | 0.00077205 | 4.85    |
| gnl UG Ssc#S19542021            | turquoise | 1013.824  | 987.16707 | 0.9925542 | 0.0007704  | 16.682  |
| gnl UG Ssc#S40277991            | turquoise | 1013.7483 | 967.88807 | 0.9893073 | 0.00132515 | 7.348   |
| gi 178056521 ref NM_001123111.1 | turquoise | 1013.6138 | 981.55792 | 0.9921251 | 0.00083789 | 6.146   |
| gi 47523553 ref NM_214240.1     | turquoise | 1013.4093 | 970.31552 | 0.9894723 | 0.00129463 | 42.236  |
| gnl UG Ssc#S40079585            | turquoise | 1013.234  | 954.31908 | 0.9866006 | 0.00185817 | 29.394  |
| gi 56607105 gb AY825267.1       | turquoise | 1012.7904 | 984.90968 | 0.9923366 | 0.00080439 | 2.122   |
| gnl UG Ssc#S23776700            | turquoise | 1012.6903 | 979.1309  | 0.9910322 | 0.00101807 | 16.304  |
| gnl UG Ssc#S23690513            | turquoise | 1012.6304 | 949.85751 | 0.9846586 | 0.00227577 | 15.752  |
| gi 52351085 gb AY609490.1       | turquoise | 1012.4741 | 985.96766 | 0.9922843 | 0.00081262 | 7.33    |
| gnl UG Ssc#S40496968            | turquoise | 1012.284  | 984.13852 | 0.9923318 | 0.00080514 | 6.658   |
| gnl UG Ssc#S38480459            | turquoise | 1011.9945 | 982.72101 | 0.9919181 | 0.00087111 | 5.358   |
| gnl UG Ssc#S19540568            | turquoise | 1011.7073 | 985.57899 | 0.9921675 | 0.00083115 | 4.136   |
| gnl UG Ssc#S23695110            | turquoise | 1011.6034 | 942.88866 | 0.9832998 | 0.00258419 | 13.436  |
| gnl UG Ssc#S31115237            | turquoise | 1011.4911 | 985.05155 | 0.9919962 | 0.00085853 | 3.97    |
| gnl UG Ssc#S39814752            | turquoise | 1011.3841 | 958.29817 | 0.9876465 | 0.00164518 | 29.652  |
| gnl UG Ssc#S18555277            | turquoise | 1011.3827 | 974.46925 | 0.9903654 | 0.00113359 | 23.184  |
| gnl UG Ssc#S18380089            | turquoise | 1011.2517 | 982.91694 | 0.991849  | 0.0008823  | 4.844   |

|                                 |           |           |           |           |            |         |
|---------------------------------|-----------|-----------|-----------|-----------|------------|---------|
| gi 115549219 dbj AK231895.1     | turquoise | 1011.1645 | 961.77334 | 0.9872916 | 0.00171648 | 29.794  |
| gi 115550647 dbj AK232477.1     | turquoise | 1010.7942 | 984.75414 | 0.9919484 | 0.00086622 | 5.846   |
| gi 115549454 dbj AK235476.1     | turquoise | 1010.6523 | 983.441   | 0.9916434 | 0.00091586 | 26.274  |
| gi 194034722 ref XM_001924603.1 | turquoise | 1010.5885 | 983.49923 | 0.9917141 | 0.00090429 | 6.584   |
| gnl UG Ssc#S31118355            | turquoise | 1010.5082 | 983.85612 | 0.99182   | 0.00088702 | 6.49    |
| gnl UG Ssc#S18557176            | turquoise | 1010.3225 | 983.69251 | 0.9918977 | 0.00087442 | 3.058   |
| gnl UG Ssc#S40435051            | turquoise | 1010.3204 | 984.29283 | 0.9917963 | 0.00089088 | 3.334   |
| gnl UG Ssc#S39985253            | turquoise | 1010.2656 | 979.92476 | 0.991044  | 0.00101606 | 7.112   |
| gnl UG Ssc#S17515868            | turquoise | 1010.2296 | 984.19182 | 0.9918494 | 0.00088225 | 12.802  |
| gnl UG Ssc#S17511415            | turquoise | 1010.2212 | 984.28887 | 0.9918412 | 0.00088357 | 3.122   |
| gnl UG Ssc#S40482366            | turquoise | 1010.063  | 984.25329 | 0.9917771 | 0.00089399 | 5.238   |
| gi 115552101 dbj AK239294.1     | turquoise | 1009.8323 | 977.20471 | 0.991137  | 0.0010003  | 49.97   |
| gnl UG Ssc#S18558052            | turquoise | 1009.7947 | 942.22607 | 0.9825265 | 0.00276543 | 2.434   |
| gi 115550918 dbj AK238779.1     | turquoise | 1009.7169 | 982.82053 | 0.9915124 | 0.00093747 | 43.584  |
| gnl UG Ssc#S19541858            | turquoise | 1009.6657 | 983.80123 | 0.9917181 | 0.00090363 | 4.24    |
| gnl UG Ssc#S31107257            | turquoise | 1009.5969 | 983.74059 | 0.9917028 | 0.00090613 | 2.85    |
| gnl UG Ssc#S23768340            | turquoise | 1009.4796 | 982.63992 | 0.9914626 | 0.00094572 | 5.518   |
| gnl UG Ssc#S31115737            | turquoise | 1009.4318 | 983.50024 | 0.9915942 | 0.00092397 | 4.392   |
| gnl UG Ssc#S31107757            | turquoise | 1009.2847 | 939.36929 | 0.982027  | 0.00288464 | 20.948  |
| gnl UG Ssc#S19545319            | turquoise | 1009.1519 | 982.91841 | 0.9914494 | 0.00094793 | 10.642  |
| gi 47523799 ref NM_214372.1     | turquoise | 1009.1363 | 978.30559 | 0.9907429 | 0.00106769 | 427.722 |
| gnl UG Ssc#S35169669            | turquoise | 1009.0091 | 980.51526 | 0.9911545 | 0.00099734 | 5.868   |
| gi 115545908 dbj AK234341.1     | turquoise | 1008.6368 | 940.69099 | 0.9824192 | 0.0027909  | 150.458 |
| gi 47522923 ref NM_214054.1     | turquoise | 1008.5258 | 981.53458 | 0.9913832 | 0.00095894 | 20.262  |
| gnl UG Ssc#S18549536            | turquoise | 1008.3484 | 939.735   | 0.9819762 | 0.00289685 | 144.09  |
| gnl UG Ssc#S19540194            | turquoise | 1008.1645 | 980.7226  | 0.9912093 | 0.00098808 | 8.224   |
| gnl UG Ssc#S40485684            | turquoise | 1008.1    | 981.27091 | 0.9914059 | 0.00095516 | 12.51   |
| gnl UG Ssc#S18548853            | turquoise | 1008.0586 | 982.3771  | 0.9913589 | 0.000963   | 5.872   |
| gnl UG Ssc#S18547054            | turquoise | 1007.906  | 982.27758 | 0.9913196 | 0.00096956 | 5.18    |
| gnl UG Ssc#S40061661            | turquoise | 1007.0257 | 970.0367  | 0.9902944 | 0.00114612 | 15.748  |
| gnl UG Ssc#S40475158            | turquoise | 1006.925  | 971.48638 | 0.9892918 | 0.00132804 | 14.466  |
| gnl UG Ssc#S18554743            | turquoise | 1006.8641 | 980.59081 | 0.9909575 | 0.0010308  | 8.01    |
| gnl UG Ssc#S23757412            | turquoise | 1006.6208 | 953.38294 | 0.9853678 | 0.00212003 | 12.938  |
| gi 194040597 ref XM_001928150.1 | turquoise | 1006.5712 | 951.21897 | 0.9851982 | 0.00215695 | 27.632  |
| gnl UG Ssc#S39997671            | turquoise | 1006.4286 | 978.14685 | 0.9904732 | 0.00111464 | 2.124   |
| gi 115548691 dbj AK231676.1     | turquoise | 1006.2326 | 967.80835 | 0.9889208 | 0.00139757 | 6.458   |
| gnl UG Ssc#S40262471            | turquoise | 1005.9128 | 980.31875 | 0.9907929 | 0.00105905 | 2.116   |
| gnl UG Ssc#S6048180             | turquoise | 1005.9128 | 980.31875 | 0.9907929 | 0.00105905 | 2.116   |
| gnl UG Ssc#S19549096            | turquoise | 1005.8975 | 980.43693 | 0.9908699 | 0.0010458  | 2.886   |
| gnl UG Ssc#S16514147            | turquoise | 1005.7839 | 949.83705 | 0.9848387 | 0.00223588 | 12.612  |
| gi 113931658 ref NM_001044598.2 | turquoise | 1005.6709 | 979.15831 | 0.9905181 | 0.00110678 | 16.292  |
| gnl UG Ssc#S17526940            | turquoise | 1005.5968 | 980.12159 | 0.9907692 | 0.00106314 | 13.998  |
| gi 85838731 gb DQ351713.1       | turquoise | 1005.5938 | 977.73288 | 0.9903828 | 0.00113053 | 3.138   |
| gnl UG Ssc#S19546179            | turquoise | 1005.5916 | 974.94444 | 0.9902709 | 0.0011503  | 5.658   |
| gnl UG Ssc#S18554456            | turquoise | 1005.5223 | 980.09761 | 0.9907845 | 0.00106051 | 1.904   |
| gnl UG Ssc#S20958918            | turquoise | 1005.5223 | 980.09761 | 0.9907845 | 0.00106051 | 1.904   |
| gnl UG Ssc#S40400469            | turquoise | 1005.4917 | 979.95704 | 0.9907187 | 0.00107187 | 5.604   |
| gnl UG Ssc#S18545724            | turquoise | 1005.4105 | 980.17596 | 0.9907131 | 0.00107284 | 4.366   |



|                                 |           |           |           |           |            |         |
|---------------------------------|-----------|-----------|-----------|-----------|------------|---------|
| gnl UG Ssc#S18359879            | turquoise | 1005.1479 | 952.53246 | 0.9847682 | 0.00225146 | 8.16    |
| gi 194034818 ref XM_001927452.1 | turquoise | 1004.7555 | 974.67652 | 0.9896374 | 0.00126432 | 10.48   |
| gi 115554417 dbj AK233427.1     | turquoise | 1004.4942 | 976.6231  | 0.9902954 | 0.00114595 | 26.67   |
| gi 47523637 ref NM_214287.1     | turquoise | 1004.4485 | 979.4456  | 0.9905177 | 0.00110685 | 20.956  |
| gi 52350718 gb AY609433.1       | turquoise | 1004.3314 | 976.2668  | 0.9901814 | 0.00116619 | 20.37   |
| gnl UG Ssc#S19540874            | turquoise | 1004.3115 | 976.89739 | 0.990236  | 0.00115648 | 4.2     |
| gnl UG Ssc#S15981406            | turquoise | 1004.245  | 979.2761  | 0.9904644 | 0.00111618 | 3.336   |
| gi 115551917 dbj AK236324.1     | turquoise | 1004.2057 | 937.61346 | 0.9816426 | 0.0029775  | 53.486  |
| gi 115549537 dbj AK235559.1     | turquoise | 1004.1557 | 951.03138 | 0.9845169 | 0.00230732 | 100.382 |
| gnl UG Ssc#S17513098            | turquoise | 1003.7281 | 967.7204  | 0.9889418 | 0.00139361 | 37.07   |
| gi 48675942 ref NM_001001640.1  | turquoise | 1003.5288 | 964.19182 | 0.9877442 | 0.00162571 | 16.69   |
| gnl UG Ssc#S18354820            | turquoise | 1003.2555 | 939.95776 | 0.9820327 | 0.00288327 | 18.226  |
| gi 194041638 ref XM_001929068.1 | turquoise | 1003.2203 | 977.05132 | 0.9901878 | 0.00116505 | 38.422  |
| gnl UG Ssc#S35332961            | turquoise | 1002.9338 | 974.88287 | 0.9895436 | 0.00128152 | 25.16   |
| gi 83816988 ref NM_001037965.1  | turquoise | 1002.7111 | 956.46369 | 0.9856581 | 0.00205735 | 20.262  |
| gi 115549455 dbj AK235477.1     | turquoise | 1002.229  | 968.93394 | 0.9885947 | 0.00145966 | 97.93   |
| gi 52351432 gb AY609862.1       | turquoise | 1002.1269 | 961.02819 | 0.9872424 | 0.00172644 | 37.97   |
| gi 194045056 ref XM_001924869.1 | turquoise | 1002.1255 | 976.78079 | 0.9898318 | 0.00122895 | 6.338   |
| gnl UG Ssc#S31103552            | turquoise | 1002.06   | 977.188   | 0.9899453 | 0.00120847 | 3.97    |
| gi 115553373 dbj AK236576.1     | turquoise | 1001.4907 | 964.22493 | 0.9883167 | 0.00151328 | 121.488 |
| gnl UG Ssc#S34511666            | turquoise | 1001.4295 | 951.22079 | 0.9848324 | 0.00223728 | 15.384  |
| gnl UG Ssc#S18361504            | turquoise | 1001.4042 | 976.42436 | 0.9897691 | 0.00124033 | 12.076  |
| gnl UG Ssc#S39979866            | turquoise | 1001.2136 | 970.97323 | 0.9888908 | 0.00140325 | 43.944  |
| gi 194036772 ref XM_001927760.1 | turquoise | 1001.1328 | 970.24466 | 0.9889845 | 0.00138554 | 36.332  |
| gnl UG Ssc#S19542648            | turquoise | 1000.8024 | 953.8786  | 0.9850616 | 0.00218682 | 11.532  |
| gi 47523725 ref NM_214333.1     | turquoise | 1000.7048 | 961.79628 | 0.9873294 | 0.00170884 | 84.924  |
| gnl UG Ssc#S17512262            | turquoise | 1000.5035 | 975.76545 | 0.9896239 | 0.0012668  | 24.222  |
| gnl UG Ssc#S18260225            | turquoise | 1000.3263 | 968.16887 | 0.9885147 | 0.00147502 | 23.024  |
| gnl UG Ssc#S18354494            | turquoise | 1000.2417 | 971.00994 | 0.988554  | 0.00146746 | 48.29   |
| gnl UG Ssc#S34517545            | turquoise | 1000.2395 | 945.37583 | 0.9834856 | 0.00254126 | 18.954  |
| gnl UG Ssc#S18276715            | turquoise | 1000.1725 | 926.30956 | 0.9785357 | 0.00376276 | 23.708  |
| gnl UG Ssc#S17503531            | turquoise | 1000.1723 | 975.20029 | 0.9895506 | 0.00128023 | 2.074   |
| gnl UG Ssc#S6043533             | turquoise | 1000.1723 | 975.20029 | 0.9895506 | 0.00128023 | 2.074   |
| gi 47523281 ref NM_213781.1     | turquoise | 999.96759 | 974.98296 | 0.9894327 | 0.00130194 | 4.018   |
| gi 115548164 dbj AK238148.1     | turquoise | 999.92715 | 972.20729 | 0.9892834 | 0.0013296  | 2.682   |
| gi 115554027 dbj AK233236.1     | turquoise | 999.86727 | 927.59254 | 0.9794512 | 0.0035251  | 34.198  |
| gnl UG Ssc#S40224927            | turquoise | 999.85874 | 972.3596  | 0.9892913 | 0.00132813 | 9.006   |
| gnl UG Ssc#S39999498            | turquoise | 999.60729 | 974.67778 | 0.9894189 | 0.00130449 | 4.084   |
| gi 194038245 ref XM_001928187.1 | turquoise | 999.60438 | 934.58118 | 0.9805566 | 0.00324506 | 125.396 |
| gnl UG Ssc#S18354389            | turquoise | 999.30501 | 973.73704 | 0.989339  | 0.00131927 | 9.614   |
| gi 194044069 ref XM_001925245.1 | turquoise | 999.00359 | 963.53326 | 0.9877518 | 0.00162421 | 13.08   |
| gnl UG Ssc#S40000845            | turquoise | 998.9032  | 974.02548 | 0.9892544 | 0.001335   | 3.3     |
| gnl UG Ssc#S40400100            | turquoise | 998.71122 | 973.88794 | 0.98906   | 0.00137134 | 2.846   |
| gnl UG Ssc#S18551025            | turquoise | 998.24326 | 967.23299 | 0.988562  | 0.00146593 | 31.16   |
| gnl UG Ssc#S40082993            | turquoise | 997.96615 | 972.32946 | 0.9886978 | 0.00143992 | 7.556   |
| gnl UG Ssc#S18555169            | turquoise | 997.43507 | 973.32072 | 0.9889052 | 0.00140052 | 3.35    |
| gnl UG Ssc#S23699771            | turquoise | 997.40235 | 972.42754 | 0.9887951 | 0.0014214  | 19.036  |
| gnl UG Ssc#S18357377            | turquoise | 997.12644 | 963.92026 | 0.9879252 | 0.00158989 | 10.684  |

|                                 |           |           |           |           |            |         |
|---------------------------------|-----------|-----------|-----------|-----------|------------|---------|
| gi 115547488 dbj AK237870.1     | turquoise | 997.00612 | 920.90076 | 0.9772748 | 0.00409835 | 81.514  |
| gnl UG Ssc#S40551411            | turquoise | 996.87721 | 948.9409  | 0.9837075 | 0.00249029 | 20.972  |
| gnl UG Ssc#S23755372            | turquoise | 996.83557 | 967.14581 | 0.9879563 | 0.00158376 | 4.44    |
| gnl UG Ssc#S18302191            | turquoise | 996.81836 | 960.68471 | 0.9869137 | 0.00179352 | 8.928   |
| gi 194040961 ref XM_001924920.1 | turquoise | 996.76364 | 937.6273  | 0.9810016 | 0.0031345  | 50.476  |
| gi 52351454 gb AY609884.1       | turquoise | 996.49123 | 971.22564 | 0.9887058 | 0.00143839 | 79.11   |
| gnl UG Ssc#S23692548            | turquoise | 996.28578 | 952.4191  | 0.984908  | 0.0022206  | 20.666  |
| gnl UG Ssc#S16350384            | turquoise | 996.27883 | 959.23841 | 0.9869814 | 0.00177963 | 3.226   |
| gi 58801554 ref NM_001011727.1  | turquoise | 996.10093 | 937.5117  | 0.9816107 | 0.00298524 | 28.39   |
| gi 52351174 gb AY609579.1       | turquoise | 995.82006 | 949.52624 | 0.9841518 | 0.00238929 | 14.438  |
| gnl UG Ssc#S26722221            | turquoise | 995.42094 | 961.41706 | 0.9874415 | 0.00168624 | 6.336   |
| gnl UG Ssc#S40242427            | turquoise | 995.18312 | 970.9473  | 0.9883856 | 0.00149993 | 2.36    |
| gi 115552265 dbj AK230574.1     | turquoise | 995.16916 | 962.92145 | 0.9879683 | 0.00158139 | 23.786  |
| gi 115554738 dbj AK237149.1     | turquoise | 995.01034 | 926.02721 | 0.9783302 | 0.00381679 | 6.994   |
| gnl UG Ssc#S19540127            | turquoise | 994.2368  | 970.24006 | 0.9881179 | 0.00155202 | 2.672   |
| gi 115548219 dbj AK231529.1     | turquoise | 993.75668 | 966.72031 | 0.9875325 | 0.00166798 | 73.828  |
| gi 157427727 ref NM_001105302.1 | turquoise | 993.61193 | 926.33774 | 0.9786686 | 0.00372794 | 30.746  |
| gnl UG Ssc#S18552081            | turquoise | 993.35523 | 938.1756  | 0.9819702 | 0.0028983  | 13.548  |
| gnl UG Ssc#S40483811            | turquoise | 993.30547 | 940.65447 | 0.9820009 | 0.00289091 | 5.06    |
| gi 194035253 ref XM_001925769.1 | turquoise | 992.81051 | 968.20819 | 0.9877362 | 0.00162731 | 3.296   |
| gi 115545916 dbj AK234349.1     | turquoise | 992.31928 | 919.69974 | 0.9767243 | 0.00424783 | 34.42   |
| gnl UG Ssc#S40107966            | turquoise | 992.30238 | 951.62168 | 0.9844589 | 0.00232028 | 6.104   |
| gnl UG Ssc#S6010002             | turquoise | 991.9409  | 930.15021 | 0.9795514 | 0.0034994  | 2.93    |
| gnl UG Ssc#S26722459            | turquoise | 991.83793 | 935.96263 | 0.9804995 | 0.00325934 | 33.092  |
| gi 115553452 dbj AK236655.1     | turquoise | 991.73411 | 963.74373 | 0.9868588 | 0.00180479 | 88.468  |
| gi 194033603 ref XM_001925557.1 | turquoise | 991.73161 | 967.98076 | 0.9874961 | 0.00167527 | 4.882   |
| gnl UG Ssc#S17512186            | turquoise | 991.65536 | 967.62253 | 0.9874736 | 0.00167979 | 23.638  |
| gi 115550714 dbj AK235788.1     | turquoise | 990.28328 | 965.54853 | 0.9870059 | 0.00177461 | 5.198   |
| gnl UG Ssc#S21579411            | turquoise | 990.16149 | 927.77457 | 0.9791646 | 0.00359894 | 13.426  |
| gnl UG Ssc#S40440719            | turquoise | 990.06414 | 959.08319 | 0.9861717 | 0.00194798 | 12.546  |
| gi 115551189 dbj AK232622.1     | turquoise | 989.78525 | 966.60166 | 0.9870947 | 0.00175648 | 17.62   |
| gnl UG Ssc#S22274163            | turquoise | 989.73881 | 964.68091 | 0.9869998 | 0.00177587 | 11.53   |
| gnl UG Ssc#S23691229            | turquoise | 989.33575 | 915.3615  | 0.9762133 | 0.00438813 | 25.998  |
| gnl UG Ssc#S18552433            | turquoise | 989.29428 | 946.58273 | 0.9831466 | 0.00261977 | 46.104  |
| gi 194041065 ref XM_001928989.1 | turquoise | 989.13297 | 918.60255 | 0.9771823 | 0.00412333 | 40.422  |
| gi 194038478 ref XM_001926160.1 | turquoise | 988.36675 | 938.7453  | 0.9810149 | 0.00313122 | 26.018  |
| gi 194038579 ref XM_001926122.1 | turquoise | 988.29637 | 945.32194 | 0.9838939 | 0.00244776 | 44.972  |
| gnl UG Ssc#S40155274            | turquoise | 988.28136 | 964.87984 | 0.9866998 | 0.00183762 | 3.338   |
| gi 47523085 ref NM_214144.1     | turquoise | 987.97908 | 952.90171 | 0.9842127 | 0.00237555 | 32.086  |
| gnl UG Ssc#S31116211            | turquoise | 987.63408 | 960.73372 | 0.9867017 | 0.00183721 | 3.682   |
| gnl UG Ssc#S18272610            | turquoise | 987.52854 | 964.26549 | 0.9865505 | 0.0018686  | 5.016   |
| gi 157427723 ref NM_001105300.1 | turquoise | 987.42229 | 954.18023 | 0.985368  | 0.00211999 | 49.312  |
| gi 47522647 ref NM_213921.1     | turquoise | 987.14501 | 939.23023 | 0.9823131 | 0.00281616 | 18.928  |
| gnl UG Ssc#S26719371            | turquoise | 986.70804 | 959.44581 | 0.9854639 | 0.00209922 | 69.496  |
| gi 115551497 dbj AK238961.1     | turquoise | 986.6553  | 932.45863 | 0.9801195 | 0.00335487 | 189.538 |
| gi 194033897 ref XM_001926189.1 | turquoise | 986.64782 | 910.89225 | 0.9747889 | 0.00478711 | 17.652  |
| gnl UG Ssc#S6073975             | turquoise | 986.51657 | 923.94172 | 0.9774625 | 0.00404781 | 35.148  |
| gnl UG Ssc#S18355850            | turquoise | 986.31537 | 935.19521 | 0.9807557 | 0.00319544 | 20.83   |

|                                 |           |           |           |           |            |         |
|---------------------------------|-----------|-----------|-----------|-----------|------------|---------|
| gnl UG Ssc#S18552515            | turquoise | 986.27273 | 960.42574 | 0.9862603 | 0.00192932 | 21.318  |
| gi 194041876 ref XM_001926725.1 | turquoise | 986.02269 | 954.02238 | 0.9851124 | 0.00217569 | 9.634   |
| gi 194035410 ref XM_001926931.1 | turquoise | 985.98499 | 951.76638 | 0.9854927 | 0.00209298 | 7.038   |
| gi 47523869 ref NM_214408.1     | turquoise | 985.97694 | 944.52663 | 0.9823023 | 0.00281874 | 55.982  |
| gi 47522769 ref NM_213971.1     | turquoise | 985.96493 | 961.21548 | 0.9860428 | 0.00197524 | 44.516  |
| gi 155369765 ref NM_001101031.1 | turquoise | 985.93512 | 954.12188 | 0.9861006 | 0.00196299 | 17.662  |
| gnl UG Ssc#S21554547            | turquoise | 985.91315 | 908.03434 | 0.9742397 | 0.00494396 | 8.088   |
| gnl UG Ssc#S26721293            | turquoise | 985.39484 | 913.05896 | 0.9752718 | 0.00465056 | 2.606   |
| gi 47523733 ref NM_214337.1     | turquoise | 985.33846 | 960.16069 | 0.9857277 | 0.00204242 | 6.382   |
| gi 52351191 gb AY609596.1       | turquoise | 984.89162 | 905.65811 | 0.9730065 | 0.0053022  | 17.868  |
| gnl UG Ssc#S6076952             | turquoise | 984.54867 | 915.02968 | 0.9754419 | 0.00460276 | 19.472  |
| gi 115547230 dbj AK234603.1     | turquoise | 983.74473 | 959.48113 | 0.9855444 | 0.00208182 | 158.714 |
| gnl UG Ssc#S6011299             | turquoise | 983.66861 | 950.37259 | 0.98366   | 0.00250119 | 39.954  |
| gnl UG Ssc#S18381906            | turquoise | 982.57748 | 950.19722 | 0.9846629 | 0.00227482 | 3.62    |
| gnl UG Ssc#S19542887            | turquoise | 982.44692 | 958.51992 | 0.985326  | 0.00212911 | 1.706   |
| gnl UG Ssc#S19545994            | turquoise | 982.01523 | 949.30101 | 0.9843732 | 0.00233947 | 5.2     |
| gnl UG Ssc#S26722332            | turquoise | 981.95293 | 953.38271 | 0.9842154 | 0.00237494 | 12.402  |
| gnl UG Ssc#S16515995            | turquoise | 981.6427  | 956.67613 | 0.9847975 | 0.00224499 | 7.114   |
| gnl UG Ssc#S22271795            | turquoise | 981.28257 | 938.78086 | 0.9807581 | 0.00319484 | 39.95   |
| gi 194044267 ref XM_001925000.1 | turquoise | 981.05913 | 946.01566 | 0.9828658 | 0.00268541 | 4.336   |
| gi 194043189 ref XM_001928908.1 | turquoise | 980.96105 | 955.02164 | 0.9844188 | 0.00232927 | 16.446  |
| gnl UG Ssc#S40588179            | turquoise | 980.85329 | 941.11752 | 0.9819756 | 0.00289699 | 32.176  |
| gi 115551787 dbj AK236193.1     | turquoise | 980.79859 | 954.87692 | 0.9843812 | 0.00233768 | 15.072  |
| gnl UG Ssc#S18556357            | turquoise | 980.76099 | 900.7644  | 0.9716526 | 0.00570492 | 39.96   |
| gnl UG Ssc#S31133980            | turquoise | 980.3261  | 956.41672 | 0.9845251 | 0.0023055  | 14.608  |
| gi 194033596 ref XM_001927813.1 | turquoise | 979.70311 | 943.88994 | 0.9820609 | 0.00287648 | 19.946  |
| gi 194043291 ref XM_001928076.1 | turquoise | 979.53839 | 941.31352 | 0.9812613 | 0.00307057 | 127.152 |
| gi 115545756 dbj AK234189.1     | turquoise | 979.32948 | 904.48142 | 0.9729634 | 0.00531487 | 8.492   |
| gnl UG Ssc#S18548111            | turquoise | 979.32239 | 920.16782 | 0.9770036 | 0.00417177 | 24.356  |
| gi 113205585 ref NM_001044535.1 | turquoise | 978.83533 | 945.89675 | 0.982592  | 0.00274992 | 25.992  |
| gnl UG Ssc#S19541038            | turquoise | 978.78487 | 946.43449 | 0.9829373 | 0.00266864 | 38.886  |
| gi 194042829 ref XM_001928949.1 | turquoise | 978.38693 | 915.41922 | 0.9767841 | 0.0042315  | 28.548  |
| gnl UG Ssc#S23690544            | turquoise | 978.1065  | 933.26135 | 0.9820773 | 0.00287256 | 23.3    |
| gnl UG Ssc#S18378972            | turquoise | 978.01983 | 921.9896  | 0.9777907 | 0.00395991 | 67.7    |
| gnl UG Ssc#S18546322            | turquoise | 977.99286 | 918.48783 | 0.9769811 | 0.00417788 | 1.396   |
| gi 194040931 ref XM_001926443.1 | turquoise | 977.97046 | 899.49449 | 0.9714472 | 0.00576684 | 15.964  |
| gi 194041032 ref XM_001925741.1 | turquoise | 977.86911 | 928.52054 | 0.9783845 | 0.00380251 | 42.558  |
| gnl UG Ssc#S17518307            | turquoise | 977.86101 | 925.38854 | 0.9786728 | 0.00372684 | 32.544  |
| gnl UG Ssc#S19543418            | turquoise | 977.72331 | 903.60418 | 0.9726281 | 0.00541378 | 51.418  |
| gi 113205675 ref NM_001044558.1 | turquoise | 977.38801 | 922.92025 | 0.9782425 | 0.00383994 | 32.088  |
| gnl UG Ssc#S31130453            | turquoise | 976.82711 | 895.82629 | 0.970339  | 0.00610478 | 8.168   |
| gi 115549299 dbj AK235220.1     | turquoise | 976.75623 | 920.23027 | 0.9772939 | 0.0040932  | 40.684  |
| gnl UG Ssc#S22275831            | turquoise | 976.48054 | 943.32963 | 0.9830973 | 0.00263127 | 1.642   |
| gi 115552144 dbj AK239337.1     | turquoise | 976.20682 | 926.60113 | 0.9783702 | 0.00380626 | 9.232   |
| gnl UG Ssc#S17518691            | turquoise | 976.14704 | 950.42933 | 0.9833541 | 0.00257162 | 4.056   |
| gnl UG Ssc#S23761842            | turquoise | 976.13925 | 939.02918 | 0.9817848 | 0.00294304 | 9.24    |
| gnl UG Ssc#S19545458            | turquoise | 976.12481 | 953.91418 | 0.9838873 | 0.00244925 | 22.266  |
| gi 115550390 dbj AK238655.1     | turquoise | 975.81221 | 949.49313 | 0.983251  | 0.00259551 | 28.56   |

|                                 |           |           |           |           |            |         |
|---------------------------------|-----------|-----------|-----------|-----------|------------|---------|
| gnl UG Ssc#S17526742            | turquoise | 975.73564 | 953.74503 | 0.9837049 | 0.00249089 | 19.066  |
| gi 194043951 ref XM_001927705.1 | turquoise | 975.36625 | 914.28188 | 0.9750075 | 0.00472513 | 28.438  |
| gnl UG Ssc#S40442649            | turquoise | 975.14634 | 946.67796 | 0.9825281 | 0.00276505 | 3.18    |
| gi 115552977 dbj AK239563.1     | turquoise | 975.12629 | 897.41653 | 0.9708026 | 0.00596265 | 95.47   |
| gnl UG Ssc#S18551519            | turquoise | 974.29843 | 944.47019 | 0.9835705 | 0.00252171 | 19.76   |
| gnl UG Ssc#S40324300            | turquoise | 973.86377 | 937.88279 | 0.9816232 | 0.0029822  | 37.14   |
| gnl UG Ssc#S31131596            | turquoise | 973.52536 | 889.32252 | 0.9689079 | 0.00655047 | 0.738   |
| gnl UG Ssc#S17517636            | turquoise | 973.51683 | 945.80846 | 0.9827056 | 0.00272309 | 2.944   |
| gnl UG Ssc#S22313154            | turquoise | 973.15885 | 901.10404 | 0.9722407 | 0.00552878 | 381.264 |
| gi 115555306 dbj AK233921.1     | turquoise | 972.98919 | 929.04197 | 0.9794995 | 0.00351269 | 29.856  |
| gnl UG Ssc#S26713936            | turquoise | 972.87106 | 949.10829 | 0.9829709 | 0.00266078 | 37.948  |
| gnl UG Ssc#S18551801            | turquoise | 972.49451 | 908.01862 | 0.9742284 | 0.00494719 | 143.614 |
| gi 52351444 gb AY609874.1       | turquoise | 972.2367  | 889.25636 | 0.9685321 | 0.00666923 | 147.482 |
| gnl UG Ssc#S40559315            | turquoise | 971.44413 | 931.72888 | 0.9790057 | 0.00364011 | 6.916   |
| gi 115549306 dbj AK235227.1     | turquoise | 971.38271 | 942.26309 | 0.9818285 | 0.00293246 | 5.506   |
| gnl UG Ssc#S18553743            | turquoise | 970.97425 | 945.88302 | 0.9823505 | 0.00280725 | 10.072  |
| gnl UG Ssc#S23771863            | turquoise | 969.96943 | 947.56864 | 0.9824076 | 0.00279365 | 1.804   |
| gi 194038838 ref XM_001927354.1 | turquoise | 969.62323 | 920.84089 | 0.9775283 | 0.00403013 | 20.368  |
| gi 190360622 ref NM_001128462.1 | turquoise | 969.62321 | 922.65769 | 0.9777094 | 0.00398162 | 21.844  |
| gnl UG Ssc#S40091470            | turquoise | 969.4205  | 935.66051 | 0.980597  | 0.00323496 | 34.294  |
| gnl UG Ssc#S19549267            | turquoise | 969.20815 | 944.38081 | 0.9815642 | 0.00299654 | 6.446   |
| gnl UG Ssc#S18384560            | turquoise | 968.8272  | 946.97926 | 0.9821059 | 0.00286569 | 9.06    |
| gnl UG Ssc#S40206941            | turquoise | 968.78967 | 886.89824 | 0.9678563 | 0.00688451 | 53.662  |
| gnl UG Ssc#S17510489            | turquoise | 968.08558 | 889.35541 | 0.9686512 | 0.00663152 | 34.544  |
| gi 115546736 dbj AK237582.1     | turquoise | 967.68062 | 918.84001 | 0.9779268 | 0.00392363 | 18.184  |
| gnl UG Ssc#S18274097            | turquoise | 967.47672 | 909.16023 | 0.9752929 | 0.00464463 | 60.676  |
| gnl UG Ssc#S40084519            | turquoise | 967.26579 | 943.62892 | 0.9818334 | 0.00293129 | 11.74   |
| gnl UG Ssc#S23700108            | turquoise | 966.56566 | 941.45418 | 0.9815935 | 0.00298942 | 8.45    |
| gnl UG Ssc#S18546390            | turquoise | 966.54306 | 905.28576 | 0.9730237 | 0.00529715 | 81.876  |
| gi 115550708 dbj AK235782.1     | turquoise | 966.44808 | 886.69045 | 0.9676545 | 0.00694921 | 47.76   |
| gnl UG Ssc#S40477070            | turquoise | 966.39883 | 944.57291 | 0.9814917 | 0.00301421 | 2.688   |
| gnl UG Ssc#S19545891            | turquoise | 965.94277 | 919.97049 | 0.9763316 | 0.00435551 | 33.762  |
| gnl UG Ssc#S18553277            | turquoise | 965.52835 | 879.91192 | 0.9664436 | 0.00734174 | 5.802   |
| gnl UG Ssc#S18379340            | turquoise | 965.09878 | 936.4277  | 0.9809871 | 0.00313807 | 5.36    |
| gnl UG Ssc#S40050544            | turquoise | 964.89956 | 914.78276 | 0.9747825 | 0.00478891 | 22.014  |
| gi 115551842 dbj AK236249.1     | turquoise | 964.7607  | 901.6713  | 0.9725256 | 0.00544412 | 85.824  |
| gnl UG Ssc#S40483502            | turquoise | 964.65197 | 917.06995 | 0.9752052 | 0.00466931 | 14.822  |
| gnl UG Ssc#S23756925            | turquoise | 964.52531 | 939.43215 | 0.9808335 | 0.00317611 | 26.34   |
| gnl UG Ssc#S40077859            | turquoise | 964.38044 | 943.10335 | 0.9808194 | 0.00317961 | 2.048   |
| gi 194034896 ref XM_001924578.1 | turquoise | 964.31274 | 916.17721 | 0.9767409 | 0.0042433  | 38.24   |
| gi 194039565 ref XM_001929124.1 | turquoise | 963.86225 | 931.57998 | 0.9797669 | 0.00344434 | 29.388  |
| gnl UG Ssc#S17525783            | turquoise | 963.5163  | 940.98484 | 0.9807165 | 0.00320519 | 5.376   |
| gnl UG Ssc#S17517257            | turquoise | 963.13631 | 941.56132 | 0.9807639 | 0.00319339 | 5.258   |
| gnl UG Ssc#S17511240            | turquoise | 963.00594 | 898.31101 | 0.9714388 | 0.00576939 | 105.314 |
| gnl UG Ssc#S17514578            | turquoise | 962.56414 | 921.90989 | 0.9787229 | 0.00371375 | 14.476  |
| gnl UG Ssc#S23771589            | turquoise | 962.54411 | 940.19326 | 0.9805524 | 0.0032461  | 4.488   |
| gi 115545542 dbj AK230657.1     | turquoise | 962.46729 | 935.74457 | 0.9805801 | 0.00323917 | 125.724 |
| gnl UG Ssc#S34521876            | turquoise | 962.32861 | 885.25705 | 0.9677172 | 0.00692909 | 10.49   |

|                                 |           |           |           |           |            |         |
|---------------------------------|-----------|-----------|-----------|-----------|------------|---------|
| gnl UG Ssc#S18354218            | turquoise | 962.31624 | 889.09571 | 0.9699765 | 0.0062167  | 10.932  |
| gnl UG Ssc#S40102974            | turquoise | 962.21459 | 936.2527  | 0.9793187 | 0.00355917 | 10.07   |
| gnl UG Ssc#S40094835            | turquoise | 962.21064 | 938.39132 | 0.9805622 | 0.00324365 | 5.972   |
| gnl UG Ssc#S18558087            | turquoise | 962.15649 | 879.59443 | 0.965731  | 0.00757603 | 11.54   |
| gi 148228719 ref NM_001097439.1 | turquoise | 962.08645 | 901.17202 | 0.9711807 | 0.00584753 | 124.864 |
| gi 156120135 ref NM_001101827.1 | turquoise | 961.87615 | 885.47051 | 0.9675485 | 0.00698329 | 55.384  |
| gi 115550806 dbj AK235881.1     | turquoise | 961.74885 | 881.4552  | 0.9665865 | 0.00729504 | 107.178 |
| gnl UG Ssc#S40048913            | turquoise | 961.53502 | 933.49208 | 0.9796392 | 0.00347692 | 20.554  |
| gnl UG Ssc#S17524702            | turquoise | 961.1495  | 873.59655 | 0.9642402 | 0.0080739  | 36.516  |
| gnl UG Ssc#S40291311            | turquoise | 960.65716 | 902.71529 | 0.9743656 | 0.00490785 | 3.322   |
| gi 194044564 ref XM_001925248.1 | turquoise | 960.04182 | 907.49536 | 0.9737118 | 0.00509631 | 26.896  |
| gi 115548319 dbj AK231543.1     | turquoise | 959.96519 | 920.1576  | 0.9771089 | 0.00414321 | 63.826  |
| gnl UG Ssc#S23695348            | turquoise | 959.84911 | 925.30299 | 0.9777316 | 0.00397568 | 10.366  |
| gi 115545949 dbj AK237390.1     | turquoise | 959.77753 | 925.31983 | 0.9768476 | 0.00421419 | 49.372  |
| gnl UG Ssc#S18267647            | turquoise | 959.36055 | 936.3853  | 0.9796484 | 0.00347458 | 63.162  |
| gnl UG Ssc#S19546257            | turquoise | 958.90929 | 879.52845 | 0.9658639 | 0.00753215 | 83.344  |
| gnl UG Ssc#S19548284            | turquoise | 958.8691  | 933.66743 | 0.9798359 | 0.00342675 | 11.788  |
| gnl UG Ssc#S39979082            | turquoise | 958.81076 | 879.97172 | 0.9664589 | 0.00733673 | 99.526  |
| gnl UG Ssc#S40475596            | turquoise | 958.65362 | 932.20663 | 0.9799677 | 0.00339329 | 8.742   |
| gi 194037750 ref XM_001926886.1 | turquoise | 957.38947 | 931.71897 | 0.979491  | 0.00351487 | 4.076   |
| gnl UG Ssc#S40108865            | turquoise | 957.37676 | 931.97015 | 0.9797574 | 0.00344676 | 36.356  |
| gnl UG Ssc#S17518997            | turquoise | 957.09012 | 935.87758 | 0.9790444 | 0.00363006 | 14.046  |
| gi 115551534 dbj AK238998.1     | turquoise | 956.93983 | 909.49813 | 0.9741974 | 0.00495612 | 50.304  |
| gi 115554129 dbj AK233339.1     | turquoise | 956.80346 | 900.34095 | 0.9717726 | 0.00566883 | 34.04   |
| gi 115548956 dbj AK235359.1     | turquoise | 956.65857 | 867.00309 | 0.9624796 | 0.00867514 | 125.804 |
| gi 115551903 dbj AK236310.1     | turquoise | 954.9754  | 922.52188 | 0.9769924 | 0.0041748  | 59.972  |
| gnl UG Ssc#S23689779            | turquoise | 954.58865 | 933.11023 | 0.9787055 | 0.00371828 | 7.016   |
| gi 115553103 dbj AK239689.1     | turquoise | 954.37777 | 879.66841 | 0.9662107 | 0.00741804 | 55.734  |
| gi 115546201 dbj AK240439.1     | turquoise | 953.98151 | 918.0539  | 0.9762105 | 0.0043889  | 48.394  |
| gnl UG Ssc#S17525847            | turquoise | 953.48249 | 931.39688 | 0.977871  | 0.00393849 | 2.154   |
| gi 194042295 ref XM_001928522.1 | turquoise | 953.46099 | 912.29831 | 0.974454  | 0.00488255 | 90.556  |
| gi 194043076 ref XM_001925356.1 | turquoise | 953.14224 | 886.49092 | 0.9679782 | 0.0068455  | 46.92   |
| gnl UG Ssc#S6024301             | turquoise | 953.09708 | 887.76634 | 0.9682913 | 0.00674568 | 5.282   |
| gi 194036698 ref XM_001928463.1 | turquoise | 951.90671 | 908.57538 | 0.9727738 | 0.00537073 | 11.616  |
| gi 201066355 ref NM_001134967.1 | turquoise | 951.77097 | 912.09284 | 0.9743203 | 0.00492085 | 4.648   |
| gi 194034434 ref XM_001925498.1 | turquoise | 951.16728 | 926.73074 | 0.9776598 | 0.00399489 | 3.85    |
| gnl UG Ssc#S40478547            | turquoise | 951.00056 | 931.13529 | 0.9776256 | 0.00400402 | 6.018   |
| gi 115550946 dbj AK238807.1     | turquoise | 950.84465 | 859.99678 | 0.9605845 | 0.00933791 | 83.75   |
| gi 115550154 dbj AK235633.1     | turquoise | 950.43078 | 917.99505 | 0.9752177 | 0.00466581 | 10.114  |
| gi 115548572 dbj AK231556.1     | turquoise | 950.2353  | 869.42075 | 0.9628146 | 0.00855964 | 63.114  |
| gnl UG Ssc#S23760498            | turquoise | 949.97711 | 922.26892 | 0.9775311 | 0.00402936 | 36.974  |
| gnl UG Ssc#S40494421            | turquoise | 949.75078 | 916.50798 | 0.9756229 | 0.00455212 | 21.23   |
| gi 115548424 dbj AK235041.1     | turquoise | 948.72648 | 907.49133 | 0.9740266 | 0.00500528 | 51.542  |
| gnl UG Ssc#S23763835            | turquoise | 948.71859 | 924.33967 | 0.9766256 | 0.00427479 | 25.2    |
| gnl UG Ssc#S18357401            | turquoise | 948.59857 | 922.25859 | 0.9761083 | 0.00441715 | 6.064   |
| gnl UG Ssc#S23701220            | turquoise | 948.41396 | 927.81243 | 0.9771766 | 0.00412488 | 3.768   |
| gnl UG Ssc#S40334954            | turquoise | 947.91462 | 858.19935 | 0.9598162 | 0.00961116 | 36.704  |
| gnl UG Ssc#S40340827            | turquoise | 946.91902 | 875.04208 | 0.9645008 | 0.00798613 | 58.39   |

|                                 |           |           |           |           |            |         |
|---------------------------------|-----------|-----------|-----------|-----------|------------|---------|
| gi 115554680 dbj AK237091.1     | turquoise | 946.68146 | 870.73286 | 0.9632368 | 0.0084148  | 23.008  |
| gnl UG Ssc#S16769740            | turquoise | 946.22783 | 923.80581 | 0.9766577 | 0.00426602 | 15.08   |
| gnl UG Ssc#S22289618            | turquoise | 946.07734 | 857.25324 | 0.9596785 | 0.00966039 | 12.69   |
| gnl UG Ssc#S26734197            | turquoise | 945.86744 | 924.58209 | 0.9760079 | 0.00444496 | 6.016   |
| gi 115552353 dbj AK232758.1     | turquoise | 945.52849 | 887.2982  | 0.9699522 | 0.00622424 | 20.234  |
| gi 47522871 ref NM_214025.1     | turquoise | 945.4097  | 920.3824  | 0.9750406 | 0.00471577 | 5.054   |
| gi 47523343 ref NM_213746.1     | turquoise | 945.32244 | 915.70117 | 0.9740501 | 0.0049985  | 3.53    |
| gnl UG Ssc#S23697986            | turquoise | 944.73766 | 920.46243 | 0.9754199 | 0.00460895 | 44.174  |
| gnl UG Ssc#S6076809             | turquoise | 943.69969 | 906.17107 | 0.9729105 | 0.00533044 | 23.526  |
| gi 52351807 gb AY610225.1       | turquoise | 942.67399 | 882.96236 | 0.9670367 | 0.00714861 | 19.46   |
| gnl UG Ssc#S18356106            | turquoise | 942.40786 | 849.63186 | 0.9576846 | 0.01038259 | 75.596  |
| gnl UG Ssc#S23701146            | turquoise | 942.14352 | 921.18777 | 0.9750949 | 0.00470041 | 5.324   |
| gi 194035578 ref XM_001928185.1 | turquoise | 942.06292 | 921.53967 | 0.9751658 | 0.00468041 | 6.774   |
| gnl UG Ssc#S18260201            | turquoise | 941.86205 | 862.22228 | 0.9617232 | 0.00893776 | 7.898   |
| gi 47523931 ref NM_214440.1     | turquoise | 941.43645 | 920.2795  | 0.9754519 | 0.00459998 | 17.064  |
| gnl UG Ssc#S29971660            | turquoise | 940.2228  | 911.82879 | 0.9732515 | 0.00523037 | 6.14    |
| gi 115554713 dbj AK237124.1     | turquoise | 940.1801  | 918.96285 | 0.9753098 | 0.00463988 | 17.886  |
| gi 115554532 dbj AK233542.1     | turquoise | 940.07026 | 915.8584  | 0.9749321 | 0.00474647 | 121.028 |
| gnl UG Ssc#S19544740            | turquoise | 939.6962  | 912.80353 | 0.9756388 | 0.00454766 | 11.026  |
| gnl UG Ssc#S40524341            | turquoise | 939.2855  | 857.94241 | 0.960704  | 0.00929566 | 12.452  |
| gnl UG Ssc#S18359073            | turquoise | 938.46978 | 914.48639 | 0.9740481 | 0.00499909 | 43.462  |
| gnl UG Ssc#S29990650            | turquoise | 938.13859 | 861.30314 | 0.9617333 | 0.00893423 | 59.062  |
| gnl UG Ssc#S18555410            | turquoise | 938.04079 | 849.17068 | 0.9572839 | 0.01052976 | 56.584  |
| gi 115553451 dbj AK236654.1     | turquoise | 937.85289 | 894.06117 | 0.9694252 | 0.00638818 | 44.298  |
| gnl UG Ssc#S18357529            | turquoise | 937.83744 | 858.92929 | 0.960262  | 0.00945229 | 3.152   |
| gi 115545734 dbj AK234167.1     | turquoise | 937.78621 | 918.32458 | 0.974139  | 0.00497289 | 4.532   |
| gnl UG Ssc#S17517701            | turquoise | 937.47394 | 899.46533 | 0.9705728 | 0.00603298 | 6.036   |
| gnl UG Ssc#S26717691            | turquoise | 937.42683 | 917.58865 | 0.9741277 | 0.00497614 | 12.136  |
| gi 115554303 dbj AK240098.1     | turquoise | 937.38077 | 894.06727 | 0.9695596 | 0.00634624 | 27.968  |
| gi 52352721 gb AY609641.1       | turquoise | 937.34945 | 916.65514 | 0.9742539 | 0.00493989 | 7.246   |
| gi 115547803 dbj AK234779.1     | turquoise | 937.33308 | 885.01949 | 0.9668265 | 0.00721684 | 117.212 |
| gi 194037670 ref XM_001924938.1 | turquoise | 936.80229 | 903.41205 | 0.972807  | 0.00536093 | 22.158  |
| gi 115548801 dbj AK231759.1     | turquoise | 935.9682  | 912.0473  | 0.9733522 | 0.00520096 | 54.002  |
| gnl UG Ssc#S6015201             | turquoise | 935.70873 | 900.3394  | 0.9730666 | 0.00528454 | 8.2     |
| gnl UG Ssc#S40078819            | turquoise | 935.39564 | 897.67853 | 0.9702362 | 0.00613647 | 26.97   |
| gi 194036099 ref XM_001929400.1 | turquoise | 935.28119 | 877.78364 | 0.9662659 | 0.00739994 | 16.186  |
| gi 115549831 dbj AK238491.1     | turquoise | 934.42259 | 914.12004 | 0.973253  | 0.00522995 | 4.458   |
| gi 47523211 ref NM_213815.1     | turquoise | 933.92389 | 891.57246 | 0.9702777 | 0.00612367 | 2.884   |
| gnl UG Ssc#S23763197            | turquoise | 933.90399 | 859.87062 | 0.9606369 | 0.00931937 | 7.548   |
| gi 115552005 dbj AK239198.1     | turquoise | 933.66421 | 852.75723 | 0.9579483 | 0.01028608 | 19.874  |
| gnl UG Ssc#S40100108            | turquoise | 931.98051 | 848.43981 | 0.9577998 | 0.0103404  | 10.376  |
| gnl UG Ssc#S17524908            | turquoise | 931.58999 | 848.87936 | 0.957871  | 0.01031436 | 10.904  |
| gi 194033624 ref XM_001924823.1 | turquoise | 931.33486 | 900.00188 | 0.971405  | 0.0057796  | 8.554   |
| gi 115547445 dbj AK237827.1     | turquoise | 930.15835 | 888.45812 | 0.9677235 | 0.00692708 | 1112.53 |
| gnl UG Ssc#S17512292            | turquoise | 929.53916 | 880.88793 | 0.9652072 | 0.00774975 | 45.93   |
| gnl UG Ssc#S6081526             | turquoise | 928.68659 | 840.42611 | 0.9547408 | 0.0114795  | 22.098  |
| gnl UG Ssc#S35167446            | turquoise | 928.25823 | 910.03478 | 0.9717728 | 0.00566877 | 13.728  |
| gnl UG Ssc#S22286222            | turquoise | 928.05559 | 885.78017 | 0.9670417 | 0.00714698 | 45.22   |

|                                 |           |           |           |           |            |         |
|---------------------------------|-----------|-----------|-----------|-----------|------------|---------|
| gnl UG Ssc#S38482262            | turquoise | 927.99461 | 887.77877 | 0.9694245 | 0.00638841 | 31.966  |
| gi 52351303 gb AY609735.1       | turquoise | 925.26053 | 901.09911 | 0.9700576 | 0.0061916  | 31.114  |
| gnl UG Ssc#S24610495            | turquoise | 924.89498 | 889.12315 | 0.96936   | 0.00640858 | 23.462  |
| gi 115550155 dbj AK235634.1     | turquoise | 924.66812 | 851.83206 | 0.958659  | 0.01002753 | 57.382  |
| gnl UG Ssc#S19541195            | turquoise | 923.76155 | 901.48889 | 0.9713143 | 0.00580705 | 4.594   |
| gi 115550178 dbj AK235657.1     | turquoise | 922.46488 | 845.46399 | 0.9573505 | 0.01050527 | 28.56   |
| gnl UG Ssc#S26714922            | turquoise | 922.21904 | 873.59719 | 0.9642116 | 0.00808355 | 32.302  |
| gi 194044985 ref XM_001927811.1 | turquoise | 921.655   | 856.43925 | 0.9606341 | 0.00932036 | 3.766   |
| gnl UG Ssc#S40182904            | turquoise | 921.61897 | 885.10315 | 0.9680042 | 0.00683721 | 17.326  |
| gnl UG Ssc#S18377961            | turquoise | 921.5411  | 871.41278 | 0.9629854 | 0.00850094 | 40.91   |
| gi 194037857 ref XM_001927835.1 | turquoise | 921.29872 | 824.6001  | 0.9502334 | 0.01322732 | 18.744  |
| gi 115550758 dbj AK235833.1     | turquoise | 921.2634  | 824.14969 | 0.9502412 | 0.01322422 | 63.248  |
| gnl UG Ssc#S40482579            | turquoise | 920.23122 | 869.12812 | 0.9646324 | 0.0079419  | 73.338  |
| gnl UG Ssc#S18550647            | turquoise | 918.3725  | 898.83914 | 0.9692911 | 0.00643013 | 2.952   |
| gnl UG Ssc#S23763192            | turquoise | 918.26331 | 899.30444 | 0.9690231 | 0.00651423 | 4.638   |
| gnl UG Ssc#S18381810            | turquoise | 917.95628 | 892.8639  | 0.9703001 | 0.00611678 | 22.246  |
| gi 194033859 ref XM_001927866.1 | turquoise | 917.80042 | 899.39268 | 0.9691264 | 0.00648177 | 91.778  |
| gi 47523717 ref NM_214328.1     | turquoise | 917.23088 | 899.20926 | 0.9687918 | 0.0065871  | 8.388   |
| gi 194043439 ref XM_001927481.1 | turquoise | 916.73475 | 830.75587 | 0.9536804 | 0.01188341 | 19.768  |
| gi 115552159 dbj AK239352.1     | turquoise | 915.86402 | 821.91618 | 0.9495287 | 0.01350781 | 25.198  |
| gnl UG Ssc#S18548520            | turquoise | 914.50089 | 874.10119 | 0.963882  | 0.00819507 | 19.714  |
| gnl UG Ssc#S26728690            | turquoise | 914.40748 | 895.4106  | 0.9680501 | 0.00682254 | 24.066  |
| gi 194042745 ref XM_001927026.1 | turquoise | 913.9453  | 893.2038  | 0.9673898 | 0.00703441 | 4.16    |
| gnl UG Ssc#S6002981             | turquoise | 911.67334 | 880.04019 | 0.9643196 | 0.0080471  | 41.502  |
| gnl UG Ssc#S34510284            | turquoise | 910.62646 | 863.01308 | 0.9614602 | 0.00902967 | 5.196   |
| gi 194042440 ref XM_001928136.1 | turquoise | 910.26584 | 859.52195 | 0.9600797 | 0.00951713 | 64.116  |
| gnl UG Ssc#S23764031            | turquoise | 910.12461 | 889.8094  | 0.9671628 | 0.00710777 | 3.39    |
| gi 194035243 ref XM_001927441.1 | turquoise | 909.51437 | 841.96884 | 0.9547948 | 0.01145907 | 55.388  |
| gnl UG Ssc#S40287461            | turquoise | 909.46095 | 868.87773 | 0.9629339 | 0.00851862 | 19.038  |
| gnl UG Ssc#S18558299            | turquoise | 909.07077 | 836.36039 | 0.954506  | 0.01156855 | 78.936  |
| gnl UG Ssc#S17516031            | turquoise | 908.91581 | 819.77081 | 0.9485354 | 0.01390643 | 2.646   |
| gi 194034892 ref XM_001929418.1 | turquoise | 907.73808 | 824.88363 | 0.950512  | 0.01311695 | 13.922  |
| gi 115545785 dbj AK234218.1     | turquoise | 907.73713 | 859.83801 | 0.9634239 | 0.00835091 | 27.838  |
| gnl UG Ssc#S23697660            | turquoise | 907.52489 | 817.50073 | 0.9477441 | 0.01422665 | 20.612  |
| gnl UG Ssc#S29979056            | turquoise | 906.66242 | 885.49112 | 0.9657556 | 0.00756789 | 4.896   |
| gi 115545566 dbj AK230681.1     | turquoise | 906.27893 | 871.15119 | 0.9619899 | 0.00884487 | 59.328  |
| gnl UG Ssc#S40095003            | turquoise | 906.08056 | 884.04115 | 0.9658782 | 0.00752742 | 6.056   |
| gnl UG Ssc#S18383171            | turquoise | 905.94787 | 872.57309 | 0.9628358 | 0.00855235 | 7.318   |
| gi 115546696 dbj AK234534.1     | turquoise | 905.77571 | 851.34412 | 0.9595967 | 0.00968968 | 51.03   |
| gi 52351397 gb AY609827.1       | turquoise | 905.08282 | 882.71422 | 0.9665731 | 0.00729941 | 10.778  |
| gnl UG Ssc#S18360447            | turquoise | 904.85445 | 879.33437 | 0.9646123 | 0.00794865 | 7.82    |
| gnl UG Ssc#S26734209            | turquoise | 904.19724 | 882.99946 | 0.9646396 | 0.00793948 | 3.45    |
| gi 115548955 dbj AK235358.1     | turquoise | 904.06126 | 807.05016 | 0.9454098 | 0.01518508 | 103.698 |
| gi 115550874 dbj AK235949.1     | turquoise | 903.96231 | 808.29149 | 0.9454254 | 0.01517863 | 59.524  |
| gi 115547217 dbj AK234590.1     | turquoise | 903.15584 | 883.77565 | 0.965699  | 0.00758658 | 2.006   |
| gi 194034997 ref XM_001928355.1 | turquoise | 903.04142 | 866.71157 | 0.9643834 | 0.00802561 | 29.998  |
| gnl UG Ssc#S40104089            | turquoise | 902.82404 | 855.68375 | 0.9621825 | 0.00877799 | 35.496  |
| gnl UG Ssc#S19540774            | turquoise | 902.79811 | 845.95634 | 0.9558676 | 0.0110554  | 41.732  |

|                                 |           |           |           |           |            |         |
|---------------------------------|-----------|-----------|-----------|-----------|------------|---------|
| gi 47523673 ref NM_214308.1     | turquoise | 902.73002 | 871.05672 | 0.9645473 | 0.00797049 | 64.438  |
| gi 115550357 dbj AK238622.1     | turquoise | 902.6405  | 808.23272 | 0.9467037 | 0.01465131 | 73.38   |
| gi 115549359 dbj AK235381.1     | turquoise | 902.26604 | 872.4691  | 0.962165  | 0.00878405 | 22.288  |
| gnl UG Ssc#S27598964            | turquoise | 901.97795 | 876.77367 | 0.9644922 | 0.00798901 | 8.192   |
| gnl UG Ssc#S40039005            | turquoise | 901.77699 | 879.59459 | 0.9656225 | 0.0076119  | 13.762  |
| gnl UG Ssc#S31133665            | turquoise | 901.0909  | 879.16414 | 0.964877  | 0.00785997 | 12.476  |
| gnl UG Ssc#S26723882            | turquoise | 900.6967  | 855.10817 | 0.9584816 | 0.01009187 | 6.714   |
| gnl UG Ssc#S40573713            | turquoise | 900.25959 | 795.73396 | 0.9420732 | 0.01658987 | 7.302   |
| gi 115552766 dbj AK239359.1     | turquoise | 899.9761  | 795.21022 | 0.9418801 | 0.01667241 | 40.078  |
| gnl UG Ssc#S40437415            | turquoise | 899.416   | 809.97146 | 0.9460308 | 0.01492815 | 29.024  |
| gnl UG Ssc#S23696033            | turquoise | 898.86635 | 854.77189 | 0.9600265 | 0.00953609 | 14.614  |
| gi 194044570 ref XM_001928614.1 | turquoise | 898.53329 | 821.49869 | 0.9495532 | 0.01349802 | 23.13   |
| gi 47523543 ref NM_214230.1     | turquoise | 897.61833 | 804.04522 | 0.9440691 | 0.01574467 | 47.94   |
| gnl UG Ssc#S26720630            | turquoise | 897.43114 | 860.03869 | 0.9591974 | 0.00983307 | 19.7    |
| gi 194038454 ref XM_001928679.1 | turquoise | 896.69977 | 874.60763 | 0.9624634 | 0.00868073 | 11.58   |
| gi 52351429 gb AY609859.1       | turquoise | 896.58809 | 874.78947 | 0.9631118 | 0.0084576  | 18.31   |
| gi 178056780 ref NM_001123122.1 | turquoise | 895.27719 | 840.99829 | 0.9546481 | 0.01151463 | 43.326  |
| gnl UG Ssc#S40014860            | turquoise | 892.56861 | 860.26714 | 0.9589172 | 0.00993413 | 3.264   |
| gnl UG Ssc#S23690475            | turquoise | 892.51243 | 874.75075 | 0.9623013 | 0.0087368  | 55.31   |
| gnl UG Ssc#S18296629            | turquoise | 890.33118 | 806.98055 | 0.9452713 | 0.01524258 | 2.402   |
| gnl UG Ssc#S18355973            | turquoise | 890.07418 | 838.3411  | 0.9564789 | 0.0108275  | 30.81   |
| gi 19919837 gb AF490841.1       | turquoise | 889.91707 | 816.97949 | 0.9481868 | 0.01404722 | 124.256 |
| gi 190352252 gb EU780792.1      | turquoise | 889.83384 | 870.37016 | 0.9610214 | 0.0091837  | 11.232  |
| gi 115551364 dbj AK236042.1     | turquoise | 889.79903 | 787.75475 | 0.9392333 | 0.01781696 | 9.17    |
| gnl UG Ssc#S40474141            | turquoise | 887.66125 | 806.96386 | 0.9454166 | 0.01518226 | 30.304  |
| gi 115546576 dbj AK234414.1     | turquoise | 887.35531 | 869.51759 | 0.9616084 | 0.00897781 | 90.122  |
| gnl UG Ssc#S23697414            | turquoise | 886.25377 | 864.64436 | 0.9594834 | 0.00973031 | 15.512  |
| gi 115549179 dbj AK231855.1     | turquoise | 884.15196 | 776.76897 | 0.936352  | 0.01909067 | 50.232  |
| gi 194036974 ref XM_001927747.1 | turquoise | 883.25088 | 848.074   | 0.9577804 | 0.01034751 | 562.674 |
| gi 115546315 dbj AK240553.1     | turquoise | 882.73301 | 866.37579 | 0.9594767 | 0.00973271 | 31.344  |
| gi 194033446 ref XM_001927265.1 | turquoise | 882.44687 | 800.86972 | 0.9433006 | 0.01606842 | 130.97  |
| gnl UG Ssc#S23701101            | turquoise | 882.0186  | 792.5352  | 0.9415665 | 0.01680671 | 10.272  |
| gi 194036442 ref XM_001925127.1 | turquoise | 880.89255 | 791.78053 | 0.9408456 | 0.01711682 | 64.414  |
| gnl UG Ssc#S23765215            | turquoise | 880.16349 | 862.16704 | 0.9589136 | 0.00993542 | 26.618  |
| gnl UG Ssc#S23695121            | turquoise | 879.29068 | 856.38031 | 0.9597112 | 0.00964871 | 11.316  |
| gi 194034473 ref XM_001924194.1 | turquoise | 876.68999 | 784.22847 | 0.939892  | 0.01752981 | 14.144  |
| gi 194034969 ref XM_001925674.1 | turquoise | 876.06879 | 847.80008 | 0.95552   | 0.01118566 | 574.562 |
| gi 115551216 dbj AK232649.1     | turquoise | 875.967   | 852.12516 | 0.9560567 | 0.01098475 | 97.338  |
| gnl UG Ssc#S40385100            | turquoise | 875.09201 | 855.66964 | 0.9572631 | 0.01053743 | 16.448  |
| gi 194041007 ref XM_001926441.1 | turquoise | 874.96253 | 821.26854 | 0.951679  | 0.01265799 | 73.866  |
| gi 115547099 dbj AK231154.1     | turquoise | 874.65179 | 852.83698 | 0.9573262 | 0.0105142  | 20.31   |
| gnl UG Ssc#S39794773            | turquoise | 873.97307 | 855.17951 | 0.9564682 | 0.01083148 | 168.094 |
| gi 115549486 dbj AK235508.1     | turquoise | 873.65901 | 760.30529 | 0.9304201 | 0.0218009  | 69.356  |
| gnl UG Ssc#S18386751            | turquoise | 872.63372 | 832.28419 | 0.9517313 | 0.01263754 | 19.61   |
| gi 115554769 dbj AK233581.1     | turquoise | 872.29707 | 813.65077 | 0.9513554 | 0.01278472 | 13.222  |
| gnl UG Ssc#S18284924            | turquoise | 872.00599 | 833.37696 | 0.9524036 | 0.01237569 | 4.504   |
| gnl UG Ssc#S23700455            | turquoise | 871.93447 | 796.58949 | 0.9413317 | 0.01690751 | 42.974  |
| gi 194035561 ref XM_001924535.1 | turquoise | 871.83861 | 801.55685 | 0.9437213 | 0.01589094 | 27.314  |



|                                 |           |           |           |           |            |         |
|---------------------------------|-----------|-----------|-----------|-----------|------------|---------|
| gnl UG Ssc#S17510311            | turquoise | 870.58223 | 839.02938 | 0.9532101 | 0.01206398 | 20.602  |
| gnl UG Ssc#S23690435            | turquoise | 870.32527 | 757.63511 | 0.9301485 | 0.02192774 | 4.016   |
| gnl UG Ssc#S23763725            | turquoise | 869.91133 | 793.01278 | 0.9419276 | 0.0166521  | 9.46    |
| gi 194040991 ref XM_001924397.1 | turquoise | 869.52052 | 835.5736  | 0.9534009 | 0.01199062 | 12.84   |
| gnl UG Ssc#S16515033            | turquoise | 869.18182 | 845.85872 | 0.9542493 | 0.01166615 | 22.68   |
| gi 194036348 ref XM_001928686.1 | turquoise | 868.79637 | 753.88533 | 0.9285032 | 0.02270127 | 44.686  |
| gi 115554617 dbj AK237028.1     | turquoise | 868.27058 | 852.69424 | 0.9554707 | 0.01120417 | 3.338   |
| gi 194035588 ref XM_001924955.1 | turquoise | 867.87536 | 810.62745 | 0.9465137 | 0.01472931 | 40.308  |
| gi 194037004 ref XM_001928953.1 | turquoise | 867.5444  | 807.55041 | 0.9440419 | 0.0157561  | 24.838  |
| gnl UG Ssc#S17511884            | turquoise | 866.71322 | 849.69982 | 0.9549882 | 0.01138596 | 8.982   |
| gi 115551088 dbj AK238949.1     | turquoise | 866.70057 | 832.19394 | 0.9542427 | 0.01166864 | 17.134  |
| gnl UG Ssc#S40558823            | turquoise | 866.2058  | 785.53614 | 0.9396337 | 0.01764222 | 3.164   |
| gnl UG Ssc#S18551170            | turquoise | 865.97097 | 802.22381 | 0.9455562 | 0.01512438 | 4.474   |
| gi 47523669 ref NM_214306.1     | turquoise | 865.92911 | 832.12361 | 0.9512331 | 0.01283275 | 49.454  |
| gnl UG Ssc#S26735434            | turquoise | 865.78354 | 822.37743 | 0.9489125 | 0.01375467 | 16.356  |
| gnl UG Ssc#S40591094            | turquoise | 865.7161  | 770.96313 | 0.9361662 | 0.01917375 | 33.258  |
| gnl UG Ssc#S18387078            | turquoise | 865.21695 | 764.26852 | 0.9319309 | 0.02109961 | 75.852  |
| gi 115554855 dbj AK233667.1     | turquoise | 864.94644 | 831.93266 | 0.951076  | 0.01289446 | 18.58   |
| gi 194034933 ref XM_001927442.1 | turquoise | 864.15264 | 814.39976 | 0.9467927 | 0.01461484 | 73.574  |
| gnl UG Ssc#S18558287            | turquoise | 863.25687 | 777.35899 | 0.9374541 | 0.01860008 | 4.724   |
| gi 194035333 ref XM_001925774.1 | turquoise | 863.04745 | 847.65676 | 0.9539467 | 0.01178152 | 31.622  |
| gnl UG Ssc#S31102746            | turquoise | 862.25043 | 746.53306 | 0.9259015 | 0.02394205 | 19.78   |
| gnl UG Ssc#S18359550            | turquoise | 862.24507 | 755.868   | 0.9301224 | 0.02193997 | 47.804  |
| gnl UG Ssc#S23701211            | turquoise | 862.23544 | 756.61759 | 0.9291571 | 0.02239282 | 22.4    |
| gnl UG Ssc#S24610008            | turquoise | 862.18438 | 805.65296 | 0.9457863 | 0.01502914 | 24.58   |
| gnl UG Ssc#S23772206            | turquoise | 861.20266 | 800.45014 | 0.9468004 | 0.01461166 | 28.896  |
| gi 115552084 dbj AK239277.1     | turquoise | 860.95528 | 797.1368  | 0.9434161 | 0.01601963 | 10.954  |
| gnl UG Ssc#S40553929            | turquoise | 859.58796 | 819.91644 | 0.9488115 | 0.01379526 | 50.728  |
| gnl UG Ssc#S23693351            | turquoise | 858.54615 | 831.10262 | 0.9509489 | 0.01294451 | 13.342  |
| gnl UG Ssc#S39980022            | turquoise | 858.53975 | 841.67284 | 0.9539015 | 0.01179881 | 14.726  |
| gnl UG Ssc#S23755367            | turquoise | 858.33813 | 759.98986 | 0.9308804 | 0.02158642 | 25.18   |
| gi 194034847 ref XM_001925969.1 | turquoise | 858.27056 | 841.91093 | 0.952762  | 0.01223686 | 19.946  |
| gnl UG Ssc#S17518104            | turquoise | 857.91133 | 795.29688 | 0.9417122 | 0.01674429 | 52.556  |
| gi 11555097 dbj AK240296.1      | turquoise | 857.8205  | 822.38411 | 0.9501943 | 0.01324283 | 79.196  |
| gnl UG Ssc#S40050895            | turquoise | 855.96656 | 743.5496  | 0.9258964 | 0.0239445  | 6.504   |
| gi 115548447 dbj AK235064.1     | turquoise | 855.64796 | 840.29832 | 0.952112  | 0.01248904 | 5.974   |
| gnl UG Ssc#S6002926             | turquoise | 855.13622 | 831.75767 | 0.9508283 | 0.01299205 | 3.896   |
| gnl UG Ssc#S17525104            | turquoise | 853.74085 | 797.8123  | 0.9420499 | 0.01659982 | 28.972  |
| gi 194041520 ref XM_001927592.1 | turquoise | 853.08532 | 735.99941 | 0.9224282 | 0.0256313  | 114.108 |
| gnl UG Ssc#S38482352            | turquoise | 851.97603 | 739.08262 | 0.9235113 | 0.02510055 | 18.796  |
| gi 115552903 dbj AK239497.1     | turquoise | 851.32213 | 770.26476 | 0.9337878 | 0.02024789 | 177.418 |
| gnl UG Ssc#S40475244            | turquoise | 849.82801 | 833.9895  | 0.9505579 | 0.01309881 | 4.904   |
| gnl UG Ssc#S34500573            | turquoise | 849.77772 | 771.61852 | 0.9345047 | 0.01992215 | 55.272  |
| gnl UG Ssc#S31122328            | turquoise | 849.6517  | 802.32956 | 0.946778  | 0.01462087 | 16.632  |
| gnl UG Ssc#S19546121            | turquoise | 847.42474 | 827.08839 | 0.9486012 | 0.01387991 | 7.94    |
| gnl UG Ssc#S18336569            | turquoise | 846.82243 | 816.54556 | 0.9465876 | 0.01469896 | 20.666  |
| gnl UG Ssc#S22290406            | turquoise | 845.44124 | 779.13592 | 0.9353893 | 0.01952253 | 22.156  |
| gi 194039500 ref XM_001925226.1 | turquoise | 844.79165 | 817.79998 | 0.9516137 | 0.01268355 | 16.532  |

|                                 |           |           |           |           |            |         |
|---------------------------------|-----------|-----------|-----------|-----------|------------|---------|
| gnl UG Ssc#S18378962            | turquoise | 844.66105 | 744.06967 | 0.9255128 | 0.02412924 | 9.788   |
| gi 194044732 ref XM_001927204.1 | turquoise | 844.63247 | 823.52963 | 0.9474238 | 0.01435697 | 27.36   |
| gi 194040741 ref XM_001926132.1 | turquoise | 844.20109 | 803.419   | 0.9489867 | 0.01372487 | 23.604  |
| gi 115545894 dbj AK234327.1     | turquoise | 844.14089 | 798.1162  | 0.9411075 | 0.01700396 | 53.08   |
| gi 194043780 ref XM_001928673.1 | turquoise | 843.50195 | 744.3607  | 0.9255926 | 0.02409076 | 11.984  |
| gnl UG Ssc#S23696826            | turquoise | 843.2606  | 787.20423 | 0.9391372 | 0.01785899 | 35.792  |
| gnl UG Ssc#S29983540            | turquoise | 841.89668 | 811.09974 | 0.9503846 | 0.01316741 | 10.94   |
| gnl UG Ssc#S39889520            | turquoise | 841.8079  | 820.11158 | 0.9470582 | 0.01450619 | 91.26   |
| gnl UG Ssc#S18385097            | turquoise | 841.55701 | 775.05509 | 0.9389622 | 0.01793558 | 9.54    |
| gnl UG Ssc#S18547346            | turquoise | 841.44649 | 776.58211 | 0.9356732 | 0.01939486 | 19.434  |
| gi 115548023 dbj AK238007.1     | turquoise | 841.13655 | 805.35102 | 0.9474823 | 0.01433314 | 8.876   |
| gnl UG Ssc#S40204678            | turquoise | 840.42553 | 735.56066 | 0.9240897 | 0.02481856 | 67.774  |
| gi 115545812 dbj AK234245.1     | turquoise | 840.12382 | 771.57623 | 0.9335927 | 0.02033686 | 35.162  |
| gi 115552187 dbj AK230496.1     | turquoise | 839.29428 | 808.57975 | 0.9447682 | 0.01545206 | 60.462  |
| gi 84490428 ref NM_001038636.1  | turquoise | 837.53769 | 751.72177 | 0.927897  | 0.02298848 | 16.008  |
| gnl UG Ssc#S17516828            | turquoise | 837.23231 | 820.23698 | 0.9464062 | 0.01477351 | 73.706  |
| gnl UG Ssc#S6052686             | turquoise | 835.07848 | 799.48095 | 0.9415849 | 0.01679884 | 7.428   |
| gi 47522869 ref NM_214024.1     | turquoise | 834.92624 | 791.07571 | 0.939511  | 0.01769573 | 100.862 |
| gi 115546083 dbj AK237525.1     | turquoise | 834.40257 | 765.45533 | 0.931019  | 0.021522   | 27.012  |
| gnl UG Ssc#S22282278            | turquoise | 833.59027 | 808.89287 | 0.9436863 | 0.01590568 | 5.04    |
| gi 194043591 ref XM_001927268.1 | turquoise | 832.02847 | 809.54631 | 0.9434752 | 0.0159947  | 54.02   |
| gi 194041303 ref XM_001927800.1 | turquoise | 831.39638 | 814.56539 | 0.944451  | 0.0155846  | 45.904  |
| gnl UG Ssc#S40550337            | turquoise | 830.99031 | 717.02498 | 0.9159879 | 0.02886    | 80.422  |
| gnl UG Ssc#S19545977            | turquoise | 829.40371 | 774.97186 | 0.9352368 | 0.01959124 | 116.874 |
| gnl UG Ssc#S17503771            | turquoise | 829.19713 | 707.38167 | 0.9126179 | 0.03059792 | 28.228  |
| gi 115547932 dbj AK234909.1     | turquoise | 828.64692 | 804.12934 | 0.9419538 | 0.01664087 | 51.716  |
| gi 194035041 ref XM_001927251.1 | turquoise | 824.77447 | 784.59737 | 0.9372017 | 0.01871207 | 57.34   |
| gi 148223598 ref NM_001097476.1 | turquoise | 823.19693 | 701.01853 | 0.9104839 | 0.03171511 | 49.102  |
| gi 115551432 dbj AK236110.1     | turquoise | 822.9348  | 719.54442 | 0.9199834 | 0.02684243 | 45.538  |
| gi 148224637 ref NM_001097469.1 | turquoise | 822.85324 | 740.83482 | 0.9233789 | 0.02516524 | 36.376  |
| gi 115548564 dbj AK231548.1     | turquoise | 820.495   | 720.03238 | 0.9166274 | 0.02853393 | 102.65  |
| gnl UG Ssc#S34518323            | turquoise | 820.40585 | 782.3448  | 0.9367508 | 0.01891264 | 9.744   |
| gnl UG Ssc#S17515754            | turquoise | 820.24236 | 692.322   | 0.9078103 | 0.03313287 | 24.796  |
| gnl UG Ssc#S26731491            | turquoise | 820.04597 | 751.11137 | 0.9297856 | 0.02209762 | 45.058  |
| gi 1955 emb X17058.1            | turquoise | 819.00233 | 699.08858 | 0.9099229 | 0.03201096 | 13.55   |
| gnl UG Ssc#S23775889            | turquoise | 817.91323 | 798.39209 | 0.9400144 | 0.01747664 | 8.23    |
| gnl UG Ssc#S6073003             | turquoise | 816.73971 | 800.34172 | 0.9416579 | 0.01676755 | 21.45   |
| gi 194033615 ref XM_001924714.1 | turquoise | 816.59081 | 783.6697  | 0.9364892 | 0.01902936 | 19.612  |
| gi 194035434 ref XM_001926912.1 | turquoise | 815.8579  | 801.33874 | 0.941385  | 0.01688463 | 9.708   |
| gnl UG Ssc#S26649927            | turquoise | 815.23394 | 740.44695 | 0.9266158 | 0.02359927 | 30.178  |
| gi 115550133 dbj AK235612.1     | turquoise | 815.04596 | 698.13512 | 0.9098374 | 0.03205611 | 411.43  |
| gnl UG Ssc#S39990452            | turquoise | 812.98025 | 798.26635 | 0.9397703 | 0.01758274 | 5.39    |
| gnl UG Ssc#S19542004            | turquoise | 812.95207 | 751.03226 | 0.927483  | 0.02318528 | 65.706  |
| gnl UG Ssc#S26649787            | turquoise | 812.90557 | 779.55147 | 0.9358962 | 0.01929475 | 18.036  |
| gi 194037952 ref XM_001924515.1 | turquoise | 812.1277  | 700.31614 | 0.9108956 | 0.0314986  | 92.666  |
| gnl UG Ssc#S40092912            | turquoise | 809.40947 | 794.48765 | 0.9384223 | 0.01817257 | 2.278   |
| gi 115551074 dbj AK238935.1     | turquoise | 807.51751 | 793.29208 | 0.9376452 | 0.01851545 | 11.086  |
| gnl UG Ssc#S23695912            | turquoise | 806.96807 | 769.25914 | 0.9345915 | 0.01988282 | 3.104   |

|                                 |           |           |           |           |            |         |
|---------------------------------|-----------|-----------|-----------|-----------|------------|---------|
| gnl UG Ssc#S6077334             | turquoise | 806.31979 | 789.01946 | 0.9381021 | 0.01831359 | 14.886  |
| gnl UG Ssc#S17517969            | turquoise | 805.65682 | 791.13519 | 0.9368509 | 0.01886806 | 2.5     |
| gnl UG Ssc#S27600696            | turquoise | 804.49316 | 774.42745 | 0.9389884 | 0.0179241  | 2.198   |
| gi 194038031 ref XM_001928655.1 | turquoise | 804.06656 | 746.39659 | 0.92642   | 0.02369306 | 14.36   |
| gnl UG Ssc#S19550604            | turquoise | 803.89437 | 721.9363  | 0.9202851 | 0.02669199 | 6.13    |
| gi 115545914 dbj AK234347.1     | turquoise | 803.43961 | 783.00283 | 0.9361852 | 0.01916524 | 8.996   |
| gi 115550975 dbj AK238836.1     | turquoise | 802.81812 | 677.96578 | 0.9038355 | 0.03527689 | 144.41  |
| gi 194038464 ref XM_001924308.1 | turquoise | 801.78815 | 770.77941 | 0.937964  | 0.01837453 | 539.154 |
| gnl UG Ssc#S40160168            | turquoise | 801.72181 | 708.74395 | 0.9148743 | 0.0294307  | 18.112  |
| gnl UG Ssc#S19545642            | turquoise | 801.51218 | 778.12874 | 0.9344586 | 0.01994301 | 75.658  |
| gi 115552448 dbj AK236453.1     | turquoise | 800.89221 | 707.29464 | 0.9132581 | 0.03026528 | 20.676  |
| gnl UG Ssc#S40095498            | turquoise | 800.64598 | 786.41355 | 0.9370497 | 0.01877961 | 5.326   |
| gnl UG Ssc#S6082353             | turquoise | 798.34009 | 765.38885 | 0.9303584 | 0.02182967 | 5.692   |
| gi 115551213 dbj AK232646.1     | turquoise | 798.23212 | 784.6417  | 0.9349577 | 0.01971717 | 8.564   |
| gnl UG Ssc#S31114839            | turquoise | 798.22047 | 665.4885  | 0.898266  | 0.03835235 | 2.102   |
| gnl UG Ssc#S40481010            | turquoise | 797.93129 | 740.56311 | 0.9238335 | 0.02494336 | 21.54   |
| gi 194034832 ref XM_001928118.1 | turquoise | 795.45046 | 685.27748 | 0.9081329 | 0.03296076 | 35.614  |
| gnl UG Ssc#S18549014            | turquoise | 795.15046 | 778.15481 | 0.9347568 | 0.01980799 | 3.282   |
| gnl UG Ssc#S18355531            | turquoise | 795.08994 | 777.45479 | 0.9366053 | 0.01897755 | 12.064  |
| gi 115545596 dbj AK230711.1     | turquoise | 794.92729 | 780.9165  | 0.9338823 | 0.02020485 | 8.812   |
| gi 194039719 ref XM_001927905.1 | turquoise | 793.22501 | 769.8138  | 0.9310866 | 0.02149058 | 5.314   |
| gi 115550785 dbj AK235860.1     | turquoise | 792.85632 | 753.88561 | 0.927944  | 0.02296618 | 67.562  |
| gnl UG Ssc#S40162503            | turquoise | 790.60264 | 673.15403 | 0.9010169 | 0.03682308 | 112.388 |
| gnl UG Ssc#S23769376            | turquoise | 790.57399 | 770.34123 | 0.9359079 | 0.01928948 | 10.14   |
| gi 115553471 dbj AK236674.1     | turquoise | 789.78564 | 718.32292 | 0.91678   | 0.0284563  | 39.314  |
| gnl UG Ssc#S18554282            | turquoise | 789.51755 | 765.09298 | 0.9299878 | 0.02200293 | 16.608  |
| gnl UG Ssc#S26713657            | turquoise | 789.19885 | 754.11455 | 0.9313992 | 0.02134556 | 42.462  |
| gi 178056656 ref NM_001123157.1 | turquoise | 789.10315 | 775.1741  | 0.9328693 | 0.02066774 | 79.262  |
| gnl UG Ssc#S26651687            | turquoise | 788.55126 | 673.79984 | 0.9030011 | 0.03573241 | 7.512   |
| gnl UG Ssc#S18378635            | turquoise | 787.71395 | 659.63515 | 0.896853  | 0.03914558 | 29.738  |
| gi 115548316 dbj AK234973.1     | turquoise | 785.97349 | 697.67368 | 0.9093935 | 0.03229096 | 42.862  |
| gi 178056875 ref NM_001123200.1 | turquoise | 785.73373 | 717.86707 | 0.9156895 | 0.02901257 | 27.538  |
| gi 194041932 ref XM_001928812.1 | turquoise | 785.32038 | 769.38886 | 0.9305466 | 0.02174187 | 61.484  |
| gnl UG Ssc#S19542674            | turquoise | 785.28612 | 738.74207 | 0.9263456 | 0.02372875 | 15.746  |
| gnl UG Ssc#S31123896            | turquoise | 784.69423 | 700.3441  | 0.9122288 | 0.03080066 | 12.178  |
| gnl UG Ssc#S23766410            | turquoise | 784.02332 | 655.85379 | 0.8945578 | 0.04044499 | 3.19    |
| gi 157427721 ref NM_001105299.1 | turquoise | 783.39101 | 747.97358 | 0.9248486 | 0.02445018 | 59.42   |
| gi 194040290 ref XM_001927693.1 | turquoise | 783.27554 | 768.44027 | 0.9309113 | 0.02157208 | 38.11   |
| gnl UG Ssc#S22276551            | turquoise | 778.98963 | 749.35559 | 0.9247963 | 0.02447551 | 21.358  |
| gnl UG Ssc#S23776294            | turquoise | 778.48701 | 758.10484 | 0.9269565 | 0.02343636 | 7.624   |
| gnl UG Ssc#S31121517            | turquoise | 776.28972 | 744.2482  | 0.9264616 | 0.02367314 | 10.906  |
| gnl UG Ssc#S18555438            | turquoise | 775.03512 | 730.4954  | 0.9239901 | 0.02486705 | 3.686   |
| gnl UG Ssc#S18548531            | turquoise | 770.90282 | 756.39656 | 0.9263946 | 0.02370523 | 22.396  |
| gi 115547381 dbj AK237762.1     | turquoise | 770.90173 | 729.7477  | 0.9260926 | 0.02385017 | 48.612  |
| gnl UG Ssc#S27600018            | turquoise | 769.70616 | 656.17445 | 0.8949338 | 0.04023116 | 88.868  |
| gi 2035 emb X16638.1            | turquoise | 769.67319 | 629.21756 | 0.8844593 | 0.04631937 | 33.326  |
| gi 115554373 dbj AK233383.1     | turquoise | 769.4882  | 741.41197 | 0.922335  | 0.02567713 | 20.03   |
| gnl UG Ssc#S17518103            | turquoise | 768.9073  | 706.31879 | 0.9152808 | 0.02922194 | 27.486  |

|                                 |           |           |           |           |            |         |
|---------------------------------|-----------|-----------|-----------|-----------|------------|---------|
| gnl UG Ssc#S40003052            | turquoise | 767.72679 | 643.54355 | 0.8915675 | 0.042158   | 96.438  |
| gi 47523913 ref NM_214432.1     | turquoise | 767.36618 | 722.36015 | 0.9180111 | 0.02783249 | 35.1    |
| gi 194035216 ref XM_001928520.1 | turquoise | 767.27216 | 686.64772 | 0.9085158 | 0.03275684 | 34.492  |
| gnl UG Ssc#S18554740            | turquoise | 764.00921 | 709.51839 | 0.9133061 | 0.03024034 | 27.978  |
| gi 52351877 gb AY610295.1       | turquoise | 763.49815 | 629.39504 | 0.8847148 | 0.04616763 | 142.428 |
| gnl UG Ssc#S23755540            | turquoise | 763.15926 | 672.58702 | 0.9032407 | 0.03560141 | 37.108  |
| gnl UG Ssc#S23699748            | turquoise | 761.98216 | 743.99706 | 0.9222035 | 0.02574186 | 4.528   |
| gi 80861404 ref NM_001037145.1  | turquoise | 758.4203  | 741.01616 | 0.921063  | 0.02630537 | 5.152   |
| gi 194034170 ref XM_001924292.1 | turquoise | 758.31438 | 733.7807  | 0.9252726 | 0.02424517 | 9.586   |
| gi 115555495 dbj AK234108.1     | turquoise | 754.10879 | 694.9831  | 0.9090018 | 0.03249858 | 43.138  |
| gnl UG Ssc#S19539925            | turquoise | 754.0458  | 649.55555 | 0.8935215 | 0.0410361  | 45.198  |
| gnl UG Ssc#S17516962            | turquoise | 753.88409 | 703.15987 | 0.911741  | 0.03105546 | 12.096  |
| gnl UG Ssc#S18272798            | turquoise | 753.03095 | 717.11321 | 0.9174659 | 0.02810821 | 23.154  |
| gi 194035984 ref XM_001925466.1 | turquoise | 752.45911 | 674.74834 | 0.9020129 | 0.03627429 | 60.794  |
| gi 148232727 ref NM_001097447.1 | turquoise | 750.96093 | 671.77725 | 0.9027492 | 0.0358703  | 21.956  |
| gnl UG Ssc#S23768511            | turquoise | 750.57867 | 652.97055 | 0.8957774 | 0.03975283 | 3.606   |
| gi 167908796 ref NM_001114672.1 | turquoise | 749.88241 | 730.35399 | 0.9177846 | 0.02794691 | 48.93   |
| gnl UG Ssc#S23758422            | turquoise | 749.69662 | 726.4084  | 0.9171355 | 0.02827573 | 61.518  |
| gnl UG Ssc#S23689683            | turquoise | 748.9888  | 653.48115 | 0.8962149 | 0.03950546 | 6.368   |
| gi 89886174 ref NM_001039749.1  | turquoise | 747.72057 | 604.58442 | 0.8746903 | 0.05223659 | 13.654  |
| gi 194038695 ref XM_001928512.1 | turquoise | 747.52465 | 622.769   | 0.8828523 | 0.04727722 | 24.29   |
| gnl UG Ssc#S18378422            | turquoise | 746.21401 | 730.37625 | 0.9208822 | 0.02639506 | 36.74   |
| gnl UG Ssc#S26726115            | turquoise | 743.28273 | 632.00711 | 0.8856711 | 0.04560118 | 18.786  |
| gnl UG Ssc#S26728186            | turquoise | 743.2493  | 595.49513 | 0.871428  | 0.05426193 | 12.958  |
| gi 115550094 dbj AK232329.1     | turquoise | 743.09943 | 605.06551 | 0.8750617 | 0.05200752 | 37.664  |
| gi 115554492 dbj AK233502.1     | turquoise | 742.87905 | 600.93617 | 0.8743181 | 0.05246644 | 28.232  |
| gi 194037865 ref XM_001928013.1 | turquoise | 742.30547 | 598.32331 | 0.8727932 | 0.05341144 | 104.92  |
| gi 194036005 ref XM_001926377.1 | turquoise | 741.8855  | 635.23485 | 0.8906883 | 0.04266598 | 103.6   |
| gi 115546833 dbj AK237679.1     | turquoise | 741.09276 | 709.80692 | 0.9210507 | 0.0263115  | 14.43   |
| gi 52351419 gb AY609849.1       | turquoise | 740.08819 | 698.5412  | 0.9083056 | 0.03286873 | 106.416 |
| gi 194035475 ref XM_001924744.1 | turquoise | 739.50729 | 672.64343 | 0.905031  | 0.03462749 | 10.964  |
| gi 194041747 ref XM_001926631.1 | turquoise | 737.89557 | 713.51335 | 0.9140032 | 0.02987956 | 60.034  |
| gi 115550351 dbj AK238616.1     | turquoise | 737.71105 | 648.92135 | 0.8936497 | 0.0409628  | 33.42   |
| gnl UG Ssc#S18550086            | turquoise | 737.45933 | 652.45136 | 0.8937059 | 0.04093071 | 27.558  |
| gnl UG Ssc#S34518006            | turquoise | 737.00702 | 708.71426 | 0.9150624 | 0.02933406 | 17.064  |
| gnl UG Ssc#S23701109            | turquoise | 736.49712 | 665.67719 | 0.90046   | 0.03713105 | 101.444 |
| gnl UG Ssc#S39983835            | turquoise | 736.08588 | 706.73409 | 0.9108962 | 0.03149826 | 7.704   |
| gnl UG Ssc#S17515869            | turquoise | 735.81601 | 718.24022 | 0.913859  | 0.02995407 | 4.222   |
| gi 115547186 dbj AK234559.1     | turquoise | 734.29595 | 613.24411 | 0.8786462 | 0.04981343 | 67.114  |
| gnl UG Ssc#S19542298            | turquoise | 733.77618 | 719.17684 | 0.9138205 | 0.02997401 | 21.21   |
| gnl UG Ssc#S40177122            | turquoise | 733.0739  | 676.85626 | 0.9053588 | 0.03445012 | 35.708  |
| gnl UG Ssc#S17515611            | turquoise | 730.1493  | 606.6368  | 0.8763964 | 0.05118704 | 169.282 |
| gnl UG Ssc#S31111777            | turquoise | 725.83962 | 635.11689 | 0.8901941 | 0.04295233 | 5.902   |
| gnl UG Ssc#S31124818            | turquoise | 725.18409 | 707.52492 | 0.9109739 | 0.03145747 | 32.214  |
| gnl UG Ssc#S18552237            | turquoise | 724.63404 | 663.27953 | 0.9001548 | 0.03730022 | 9.658   |
| gi 115550896 dbj AK235971.1     | turquoise | 724.26762 | 578.96536 | 0.8640621 | 0.058923   | 87.472  |
| gnl UG Ssc#S40370377            | turquoise | 723.65012 | 706.69295 | 0.9119909 | 0.03092484 | 62.814  |
| gnl UG Ssc#S22284475            | turquoise | 723.55439 | 674.22951 | 0.9001544 | 0.03730044 | 43.52   |

|                                 |           |           |           |           |            |         |
|---------------------------------|-----------|-----------|-----------|-----------|------------|---------|
| gi 194044923 ref XM_001927589.1 | turquoise | 723.3038  | 669.4676  | 0.9067721 | 0.03368871 | 16.482  |
| gi 115553034 dbj AK239620.1     | turquoise | 722.47275 | 705.09916 | 0.9093231 | 0.03232823 | 55.328  |
| gi 194040677 ref XM_001927466.1 | turquoise | 721.87563 | 574.12663 | 0.8627104 | 0.05979135 | 92.484  |
| gi 115552430 dbj AK236435.1     | turquoise | 720.34784 | 676.20993 | 0.9038541 | 0.03526674 | 44.142  |
| gnl UG Ssc#S29974861            | turquoise | 720.04564 | 699.48376 | 0.9156106 | 0.02905295 | 31.332  |
| gi 194035197 ref XM_001925318.1 | turquoise | 719.83264 | 630.83506 | 0.8850263 | 0.04598288 | 146.236 |
| gnl UG Ssc#S6064423             | turquoise | 718.40204 | 642.49937 | 0.8969204 | 0.03910764 | 23.728  |
| gi 194039563 ref XM_001929079.1 | turquoise | 715.94897 | 584.96526 | 0.8676011 | 0.05666853 | 13.998  |
| gnl UG Ssc#S40318462            | green     | 714.84941 | 80.280731 | 0.9613514 | 0.00906779 | 193.368 |
| gnl UG Ssc#S19546570            | turquoise | 713.58537 | 633.9742  | 0.8944452 | 0.04050907 | 7.522   |
| gi 47523255 ref NM_213792.1     | turquoise | 712.43115 | 598.94979 | 0.8733423 | 0.05307053 | 15.028  |
| gi 47522943 ref NM_214064.1     | turquoise | 712.32493 | 689.89033 | 0.9054402 | 0.03440611 | 6.09    |
| gi 115552215 dbj AK230524.1     | turquoise | 711.32919 | 588.32527 | 0.8694186 | 0.05552148 | 12.24   |
| gnl UG Ssc#S19542685            | turquoise | 711.27641 | 695.8538  | 0.9064439 | 0.03386503 | 18.344  |
| gi 194043856 ref XM_001928206.1 | turquoise | 711.0726  | 591.98301 | 0.8708875 | 0.05459987 | 40.812  |
| gnl UG Ssc#S20945025            | turquoise | 709.82823 | 565.70692 | 0.8588663 | 0.0622824  | 56.038  |
| gnl UG Ssc#S23770448            | turquoise | 709.31885 | 695.14604 | 0.908323  | 0.03285947 | 8.616   |
| gi 115554351 dbj AK240146.1     | turquoise | 707.54239 | 689.50097 | 0.9054959 | 0.03437605 | 75.204  |
| gnl UG Ssc#S40356278            | turquoise | 705.5311  | 618.77871 | 0.8846795 | 0.0461886  | 20.192  |
| gi 115555353 dbj AK233966.1     | turquoise | 705.36579 | 691.95112 | 0.905188  | 0.0345425  | 10.674  |
| gi 115552494 dbj AK236499.1     | turquoise | 704.43305 | 586.63116 | 0.8692225 | 0.0556449  | 21.882  |
| gnl UG Ssc#S40004648            | turquoise | 704.23261 | 644.65507 | 0.8923372 | 0.04171494 | 50.79   |
| gi 115546964 dbj AK240610.1     | turquoise | 704.15035 | 594.2538  | 0.8721817 | 0.05379186 | 20.56   |
| gnl UG Ssc#S23759611            | green     | 702.1644  | 78.159304 | 0.9549155 | 0.01141342 | 6.85    |
| gnl UG Ssc#S18554366            | turquoise | 701.07756 | 677.6235  | 0.899696  | 0.0375549  | 43.246  |
| gi 194038277 ref XM_001926890.1 | turquoise | 699.46085 | 624.12994 | 0.889166  | 0.04355002 | 51.154  |
| gi 57528034 ref NM_001009582.1  | turquoise | 697.43382 | 611.49502 | 0.8769007 | 0.05087815 | 403.054 |
| gnl UG Ssc#S26720534            | green     | 694.15935 | 83.378408 | 0.9696109 | 0.00633027 | 31.948  |
| gnl UG Ssc#S26391884            | turquoise | 692.41747 | 643.16015 | 0.8922502 | 0.04176496 | 7.066   |
| gnl UG Ssc#S18292832            | turquoise | 692.20553 | 636.25773 | 0.8936125 | 0.04098406 | 8.908   |
| gnl UG Ssc#S17525951            | turquoise | 691.84262 | 635.98726 | 0.8858646 | 0.04548684 | 17.272  |
| gi 115548389 dbj AK235006.1     | turquoise | 690.68027 | 569.00332 | 0.8594083 | 0.06192928 | 48.126  |
| gnl UG Ssc#S19547860            | turquoise | 690.6012  | 663.01046 | 0.8949332 | 0.04023153 | 54.226  |
| gi 52351234 gb AY609666.1       | turquoise | 690.1829  | 594.25513 | 0.874132  | 0.05258147 | 44.012  |
| gnl UG Ssc#S17525376            | turquoise | 688.09346 | 599.7894  | 0.8793384 | 0.04939318 | 29.532  |
| gnl UG Ssc#S40576057            | turquoise | 686.63562 | 648.43744 | 0.9022604 | 0.03613829 | 9.49    |
| gnl UG Ssc#S31102731            | turquoise | 686.39445 | 650.89639 | 0.8928064 | 0.04144556 | 7.35    |
| gnl UG Ssc#S19542246            | turquoise | 686.376   | 662.81776 | 0.8966984 | 0.03923268 | 27.462  |
| gi 194040238 ref XM_001929612.1 | turquoise | 684.36311 | 648.06151 | 0.8900371 | 0.04304344 | 14.616  |
| gnl UG Ssc#S18549962            | turquoise | 682.51255 | 599.90002 | 0.8725967 | 0.05353357 | 30.818  |
| gi 115547522 dbj AK237904.1     | green     | 682.44556 | 85.119567 | 0.9744709 | 0.00487771 | 85.474  |
| gnl UG Ssc#S18357580            | turquoise | 681.85447 | 582.81622 | 0.8670909 | 0.05699181 | 33.072  |
| gnl UG Ssc#S23757023            | turquoise | 680.75373 | 548.16428 | 0.8557909 | 0.06429807 | 10.612  |
| gi 115555693 dbj AK237326.1     | turquoise | 680.62062 | 569.39265 | 0.8606776 | 0.06110469 | 53.188  |
| gnl UG Ssc#S23756069            | turquoise | 677.09487 | 628.18472 | 0.8947852 | 0.04031565 | 2.108   |
| gi 115546371 dbj AK230890.1     | turquoise | 676.81445 | 540.14554 | 0.8490733 | 0.06876989 | 54.664  |
| gi 47522941 ref NM_214063.1     | turquoise | 676.41051 | 571.39244 | 0.863431  | 0.05932795 | 56.744  |
| gnl UG Ssc#S18548934            | turquoise | 674.68137 | 520.28951 | 0.8404378 | 0.07465371 | 34.478  |

|                                 |           |           |           |           |            |         |
|---------------------------------|-----------|-----------|-----------|-----------|------------|---------|
| gi 115547340 dbj AK234713.1     | green     | 673.14798 | 80.412548 | 0.9623609 | 0.00871615 | 108.582 |
| gnl UG Ssc#S23766637            | turquoise | 673.02795 | 639.00397 | 0.890435  | 0.04281266 | 101.48  |
| gi 115552311 dbj AK230621.1     | turquoise | 672.95145 | 528.0942  | 0.8424845 | 0.07324566 | 51.622  |
| gi 115555023 dbj AK240222.1     | turquoise | 672.07112 | 555.40783 | 0.8606504 | 0.06112232 | 65.86   |
| gi 115549412 dbj AK235434.1     | turquoise | 670.21444 | 637.11291 | 0.8854213 | 0.04574898 | 58.6    |
| gnl UG Ssc#S23760465            | turquoise | 669.13276 | 656.40208 | 0.8956605 | 0.03981903 | 15.334  |
| gi 115545821 dbj AK234254.1     | turquoise | 668.83543 | 644.9045  | 0.8903832 | 0.04284268 | 37.038  |
| gnl UG Ssc#S6072825             | green     | 668.74249 | 81.246684 | 0.9635627 | 0.00830359 | 69.118  |
| gnl UG Ssc#S17518758            | turquoise | 668.45305 | 647.18337 | 0.8903038 | 0.04288869 | 6.204   |
| gnl UG Ssc#S40141315            | turquoise | 668.24092 | 523.28074 | 0.8396906 | 0.07516977 | 13.658  |
| gi 115553434 dbj AK236637.1     | turquoise | 665.88814 | 636.31636 | 0.8849139 | 0.04604955 | 8.544   |
| gi 178057176 ref NM_001123090.1 | turquoise | 665.77364 | 583.84309 | 0.8744999 | 0.05235411 | 47.4    |
| gi 194043281 ref XM_001927737.1 | green     | 665.06578 | 84.960131 | 0.9741503 | 0.00496966 | 13.532  |
| gnl UG Ssc#S26716503            | turquoise | 664.54567 | 594.98634 | 0.8745272 | 0.05233724 | 17.204  |
| gnl UG Ssc#S18268722            | turquoise | 664.47827 | 617.20058 | 0.8793678 | 0.04937534 | 11.382  |
| gnl UG Ssc#S18552112            | green     | 661.95868 | 83.267267 | 0.9696409 | 0.00632091 | 19.566  |
| gnl UG Ssc#S17509854            | turquoise | 661.52928 | 626.70715 | 0.8844521 | 0.04632363 | 19.818  |
| gi 196259975 ref NM_001131045.1 | turquoise | 661.25048 | 595.63695 | 0.8744664 | 0.05237482 | 87.352  |
| gnl UG Ssc#S18276682            | turquoise | 660.67018 | 615.44203 | 0.8870079 | 0.0448131  | 6.194   |
| gi 115550971 dbj AK238832.1     | turquoise | 660.54832 | 635.17938 | 0.885056  | 0.04596531 | 36.522  |
| gi 115554977 dbj AK240176.1     | turquoise | 660.25641 | 630.37554 | 0.8826221 | 0.04741492 | 13.942  |
| gnl UG Ssc#S18381759            | turquoise | 657.79127 | 635.20786 | 0.8846065 | 0.04623196 | 5.884   |
| gi 115547032 dbj AK231087.1     | turquoise | 657.61626 | 620.21311 | 0.8795463 | 0.04926716 | 10.296  |
| gnl UG Ssc#S17511439            | turquoise | 657.27422 | 641.7877  | 0.8931143 | 0.0412691  | 46.84   |
| gi 194035846 ref XM_001928960.1 | turquoise | 656.94524 | 644.07876 | 0.8866137 | 0.04504505 | 124.57  |
| gnl UG Ssc#S26722436            | turquoise | 653.31567 | 634.16009 | 0.8937118 | 0.0409273  | 3.526   |
| gi 194035192 ref XM_001924962.1 | turquoise | 651.77294 | 524.75276 | 0.8455633 | 0.07114331 | 25.03   |
| gi 194038708 ref XM_001928665.1 | green     | 651.36153 | 83.454897 | 0.9706559 | 0.00600751 | 179.728 |
| gi 194038723 ref XM_001929103.1 | turquoise | 651.15998 | 638.81236 | 0.8851662 | 0.0459     | 23.168  |
| gi 115550002 dbj AK232237.1     | turquoise | 650.20908 | 631.83262 | 0.8932259 | 0.04120519 | 555.12  |
| gi 115550416 dbj AK238681.1     | black     | 649.49444 | 42.887619 | 0.9261645 | 0.02381563 | 37.676  |
| gnl UG Ssc#S18546249            | turquoise | 649.21173 | 634.78817 | 0.8830835 | 0.04713904 | 17.346  |
| gnl UG Ssc#S5984485             | turquoise | 648.78668 | 634.66912 | 0.8848511 | 0.04608679 | 9.358   |
| gnl UG Ssc#S19545784            | turquoise | 647.72479 | 507.37526 | 0.8320152 | 0.08053437 | 29.53   |
| gi 194037372 ref XM_001927549.1 | turquoise | 647.25501 | 610.51361 | 0.8789629 | 0.04962099 | 53      |
| gnl UG Ssc#S6016211             | turquoise | 641.32963 | 620.3525  | 0.879567  | 0.04925461 | 8.36    |
| gnl UG Ssc#S23701149            | turquoise | 641.14578 | 583.99385 | 0.8653154 | 0.05812147 | 10.956  |
| gnl UG Ssc#S39879611            | turquoise | 640.48654 | 628.27695 | 0.8813149 | 0.0481994  | 4.926   |
| gnl UG Ssc#S18291190            | turquoise | 639.97247 | 489.89693 | 0.8239719 | 0.08627678 | 6.584   |
| gnl UG Ssc#S39991153            | green     | 638.80381 | 87.211355 | 0.9797183 | 0.00345674 | 3.322   |
| gnl UG Ssc#S26724832            | green     | 638.19597 | 73.74907  | 0.9420911 | 0.01658221 | 22.94   |
| gi 194045109 ref XM_001927874.1 | green     | 637.22153 | 87.15756  | 0.9795835 | 0.00349116 | 41.4    |
| gi 115553396 dbj AK236599.1     | turquoise | 637.07859 | 547.08798 | 0.8566701 | 0.06371978 | 15.84   |
| gnl UG Ssc#S18556295            | green     | 636.41635 | 77.704835 | 0.9538256 | 0.01182783 | 69.278  |
| gi 115547260 dbj AK234633.1     | turquoise | 636.30092 | 612.87166 | 0.8763913 | 0.0511902  | 36.706  |
| gnl UG Ssc#S26718109            | turquoise | 635.73247 | 604.49216 | 0.8729182 | 0.05333378 | 13.344  |
| gnl UG Ssc#S18387501            | turquoise | 635.65634 | 583.48336 | 0.8657364 | 0.05785299 | 37.77   |
| gi 115545757 dbj AK234190.1     | green     | 633.70953 | 82.810456 | 0.9693314 | 0.0064175  | 27.168  |

|                                 |           |           |           |           |            |         |
|---------------------------------|-----------|-----------|-----------|-----------|------------|---------|
| gnl UG Ssc#S5983468             | turquoise | 633.61741 | 619.28915 | 0.8831938 | 0.04707318 | 3.918   |
| gnl UG Ssc#S19545449            | turquoise | 631.60473 | 480.28405 | 0.8222776 | 0.08750178 | 45.312  |
| gi 47523867 ref NM_214407.1     | green     | 631.51777 | 86.082606 | 0.9774699 | 0.00404582 | 124.838 |
| gnl UG Ssc#S23775891            | turquoise | 627.97979 | 604.44042 | 0.8784662 | 0.04992289 | 81.464  |
| gnl UG Ssc#S23761029            | black     | 626.87535 | 43.585086 | 0.9291482 | 0.022397   | 2.39    |
| gi 125630305 ref NM_214281.2    | turquoise | 622.58445 | 578.12506 | 0.8758545 | 0.05151966 | 19.628  |
| gi 115547094 dbj AK231149.1     | green     | 622.54638 | 80.970913 | 0.9631259 | 0.00845276 | 26.518  |
| gnl UG Ssc#S17517759            | green     | 622.3644  | 87.835627 | 0.9813109 | 0.00305842 | 8.682   |
| gnl UG Ssc#S26710759            | turquoise | 619.23262 | 575.49943 | 0.8721557 | 0.05380803 | 92.524  |
| gnl UG Ssc#S40490912            | turquoise | 619.21444 | 595.38246 | 0.8731116 | 0.05321366 | 6.122   |
| gi 115550075 dbj AK232310.1     | turquoise | 618.48691 | 596.83042 | 0.8685423 | 0.05607358 | 4.66    |
| gnl UG Ssc#S18355677            | turquoise | 618.129   | 489.36597 | 0.8262257 | 0.08465545 | 8.996   |
| gi 194043070 ref XM_001928504.1 | turquoise | 617.61979 | 552.40448 | 0.8582149 | 0.06270766 | 4.674   |
| gi 178056505 ref NM_001123131.1 | turquoise | 617.5338  | 464.86703 | 0.8162835 | 0.09187779 | 14.126  |
| gi 115550755 dbj AK235829.1     | turquoise | 617.23917 | 560.68496 | 0.8608854 | 0.06097    | 101.35  |
| gnl UG Ssc#S18383312            | turquoise | 617.09736 | 593.50311 | 0.8691588 | 0.05568496 | 9.51    |
| gnl UG Ssc#S18555055            | turquoise | 616.25864 | 479.78533 | 0.8201508 | 0.08904698 | 40.998  |
| gnl UG Ssc#S23762560            | turquoise | 616.2279  | 593.81097 | 0.8709179 | 0.05458079 | 31.488  |
| gnl UG Ssc#S40389825            | turquoise | 616.12417 | 600.07705 | 0.8751977 | 0.05192371 | 11.888  |
| gnl UG Ssc#S40006504            | turquoise | 615.36484 | 511.87838 | 0.8387032 | 0.07585346 | 5.49    |
| gi 115548394 dbj AK235011.1     | black     | 615.27187 | 44.846364 | 0.937808  | 0.01844343 | 98.28   |
| gnl UG Ssc#S16769298            | turquoise | 614.81936 | 507.74711 | 0.8401736 | 0.07483604 | 5.26    |
| gi 115548467 dbj AK235084.1     | turquoise | 613.67325 | 503.22555 | 0.8301772 | 0.08183579 | 236.442 |
| gnl UG Ssc#S40481152            | turquoise | 613.21929 | 580.11363 | 0.8689797 | 0.05579777 | 3.112   |
| gnl UG Ssc#S6085710             | turquoise | 611.01465 | 596.46156 | 0.871048  | 0.05449946 | 22.068  |
| gnl UG Ssc#S40258460            | green     | 608.96782 | 85.850075 | 0.9769846 | 0.00417694 | 30.75   |
| gi 194041397 ref XM_001928870.1 | green     | 608.44323 | 84.424006 | 0.9733229 | 0.00520951 | 15.932  |
| gnl UG Ssc#S19545902            | green     | 607.62979 | 88.983095 | 0.9844067 | 0.00233198 | 56.014  |
| gnl UG Ssc#S18281053            | turquoise | 604.68698 | 501.4715  | 0.8315923 | 0.08083321 | 80.48   |
| gi 47522935 ref NM_214060.1     | turquoise | 599.79916 | 586.01465 | 0.8653187 | 0.05811936 | 62.776  |
| gnl UG Ssc#S40500672            | turquoise | 599.53568 | 508.78054 | 0.833729  | 0.07932668 | 206.356 |
| gnl UG Ssc#S41577006            | black     | 597.90045 | 41.407561 | 0.9177119 | 0.0279837  | 8.834   |
| gi 115549787 dbj AK232067.1     | turquoise | 596.37206 | 503.78246 | 0.8310516 | 0.08121586 | 49.868  |
| gi 115553590 dbj AK239777.1     | turquoise | 596.24738 | 447.91917 | 0.8039438 | 0.10108848 | 33.034  |
| gi 52351587 gb AY610017.1       | turquoise | 594.90799 | 501.34667 | 0.8361819 | 0.07760798 | 127.482 |
| gi 47522779 ref NM_213977.1     | turquoise | 594.36745 | 516.22861 | 0.8358008 | 0.0778742  | 49.154  |
| gnl UG Ssc#S17510601            | turquoise | 593.86703 | 497.47167 | 0.830038  | 0.08193462 | 17.906  |
| gnl UG Ssc#S40054290            | green     | 593.01747 | 87.357317 | 0.980841  | 0.00317424 | 33.462  |
| gi 52350726 gb AY609441.1       | turquoise | 592.64146 | 537.01611 | 0.8484289 | 0.06920371 | 17.36   |
| gnl UG Ssc#S40327466            | turquoise | 592.05065 | 537.39153 | 0.8468454 | 0.07027345 | 1.256   |
| gi 115549388 dbj AK235410.1     | turquoise | 591.3242  | 573.90414 | 0.8648802 | 0.05839939 | 22.202  |
| gi 167908792 ref NM_001114670.1 | turquoise | 591.30582 | 544.03704 | 0.8609427 | 0.06093287 | 74.032  |
| gnl UG Ssc#S27599980            | turquoise | 590.40105 | 489.14492 | 0.8251214 | 0.08544865 | 91.36   |
| gi 52351086 gb AY609491.1       | turquoise | 590.28203 | 573.94132 | 0.8607333 | 0.0610686  | 2.764   |
| gnl UG Ssc#S23694886            | green     | 589.63036 | 87.029214 | 0.979585  | 0.00349079 | 19.67   |
| gi 49274614 ref NM_001001860.1  | turquoise | 588.33823 | 477.59185 | 0.8167519 | 0.09153346 | 575.974 |
| gnl UG Ssc#S17526874            | turquoise | 588.20062 | 554.64255 | 0.851724  | 0.06699417 | 74.572  |
| gi 194043267 ref XM_001926534.1 | turquoise | 588.18152 | 563.07746 | 0.854599  | 0.06508466 | 6.948   |

|                                 |           |           |           |           |            |         |
|---------------------------------|-----------|-----------|-----------|-----------|------------|---------|
| gnl UG Ssc#S40044675            | turquoise | 586.76588 | 496.78133 | 0.833476  | 0.07950461 | 10.572  |
| gi 194033456 ref XM_001924731.1 | turquoise | 581.86771 | 421.9879  | 0.7921776 | 0.11011537 | 10.83   |
| gnl UG Ssc#S40554875            | turquoise | 581.0729  | 561.59896 | 0.853933  | 0.06552547 | 25.058  |
| gi 194036619 ref XM_001927496.1 | green     | 580.4676  | 86.759723 | 0.9796519 | 0.00347368 | 27.176  |
| gi 194038714 ref XM_001926092.1 | turquoise | 580.44021 | 558.90866 | 0.8551065 | 0.06474938 | 47.672  |
| gnl UG Ssc#S29977062            | turquoise | 580.24134 | 440.69862 | 0.7995166 | 0.10445754 | 2.496   |
| gnl UG Ssc#S39959676            | turquoise | 579.92465 | 441.1847  | 0.7991257 | 0.10475659 | 4.112   |
| gi 52351696 gb AY610126.1       | turquoise | 579.77249 | 435.50821 | 0.7963961 | 0.10685218 | 21.452  |
| gnl UG Ssc#S39994657            | turquoise | 579.2925  | 519.61598 | 0.8387023 | 0.07585415 | 10.744  |
| gnl UG Ssc#S19545587            | turquoise | 578.65465 | 429.73409 | 0.7954313 | 0.10759591 | 4.378   |
| gnl UG Ssc#S31122252            | turquoise | 578.0919  | 494.91069 | 0.8287015 | 0.08288537 | 31.436  |
| gi 115550346 dbj AK238611.1     | turquoise | 576.75481 | 560.26373 | 0.8546241 | 0.06506807 | 19.624  |
| gi 47522831 ref NM_214003.1     | turquoise | 575.91926 | 493.14981 | 0.8255057 | 0.08517239 | 117.826 |
| gi 115551181 dbj AK232614.1     | turquoise | 575.86286 | 529.66798 | 0.8426892 | 0.07310532 | 66.062  |
| gnl UG Ssc#S22272079            | turquoise | 575.36809 | 551.06243 | 0.8492514 | 0.06865011 | 4.69    |
| gi 115552725 dbj AK232930.1     | turquoise | 574.22283 | 452.19311 | 0.8144765 | 0.09320978 | 30.826  |
| gi 194043074 ref XM_001928487.1 | turquoise | 573.21934 | 452.30346 | 0.8042953 | 0.1008224  | 133.566 |
| gnl UG Ssc#S18551494            | turquoise | 573.08093 | 510.21721 | 0.8324189 | 0.08024938 | 89.386  |
| gi 115554063 dbj AK233272.1     | green     | 572.90157 | 91.79593  | 0.9915597 | 0.00092966 | 31.314  |
| gnl UG Ssc#S40043958            | black     | 572.76654 | 47.806818 | 0.9538391 | 0.01182267 | 57.086  |
| gi 194033834 ref XM_001924991.1 | turquoise | 570.07589 | 423.66821 | 0.7895125 | 0.11219213 | 39.032  |
| gnl UG Ssc#S22276105            | turquoise | 569.8054  | 479.60158 | 0.8267719 | 0.08426392 | 5.23    |
| gi 52351905 gb AY610323.1       | turquoise | 569.74861 | 536.76289 | 0.844321  | 0.0719893  | 28.63   |
| gnl UG Ssc#S19541728            | turquoise | 569.21168 | 542.3373  | 0.8547218 | 0.06500348 | 27.176  |
| gi 61097882 ref NM_001012956.1  | black     | 568.40049 | 46.356397 | 0.9485413 | 0.01390406 | 31.642  |
| gnl UG Ssc#S18553702            | turquoise | 568.3508  | 542.24248 | 0.8512158 | 0.06733353 | 18.85   |
| gi 115548919 dbj AK235322.1     | turquoise | 566.93938 | 516.78782 | 0.8429721 | 0.07291143 | 54.528  |
| gnl UG Ssc#S29980298            | green     | 566.01718 | 89.375206 | 0.9866588 | 0.00184611 | 3.398   |
| gnl UG Ssc#S38481793            | turquoise | 565.39936 | 548.41283 | 0.8625579 | 0.05988958 | 2.23    |
| gnl UG Ssc#S18359557            | turquoise | 564.74362 | 526.16631 | 0.8395015 | 0.07530057 | 22.764  |
| gnl UG Ssc#S34504168            | turquoise | 564.04072 | 488.16201 | 0.8266009 | 0.08438648 | 55.642  |
| gi 109639161 ref NM_001006593.2 | turquoise | 563.66003 | 549.01056 | 0.8561628 | 0.06405329 | 14.12   |
| gi 115546623 dbj AK234461.1     | turquoise | 563.64337 | 532.3892  | 0.8423202 | 0.07335836 | 262.534 |
| gnl UG Ssc#S31118680            | green     | 563.41019 | 88.599865 | 0.9847674 | 0.00225164 | 2.788   |
| gnl UG Ssc#S18557214            | turquoise | 562.14657 | 428.58552 | 0.7948754 | 0.10802508 | 27.444  |
| gnl UG Ssc#S26733997            | green     | 561.32592 | 89.685537 | 0.9867447 | 0.00182831 | 13.834  |
| gi 194036434 ref XM_001926977.1 | green     | 560.82776 | 86.894146 | 0.9788359 | 0.00368426 | 174.676 |
| gi 115545530 dbj AK230645.1     | turquoise | 559.36489 | 538.07727 | 0.8446218 | 0.07178421 | 12.822  |
| gnl UG Ssc#S40089767            | turquoise | 558.62421 | 498.67308 | 0.8264898 | 0.0844661  | 49.184  |
| gi 115553171 dbj AK232969.1     | turquoise | 558.23048 | 538.33492 | 0.8475143 | 0.06982095 | 83.892  |
| gnl UG Ssc#S18358603            | green     | 557.8373  | 91.57512  | 0.991041  | 0.00101658 | 20.002  |
| gnl UG Ssc#S26721796            | black     | 557.51208 | 48.880539 | 0.9621972 | 0.00877289 | 6.08    |
| gi 115546075 dbj AK237517.1     | turquoise | 557.4162  | 506.74001 | 0.8334077 | 0.07955264 | 26.84   |
| gi 47523607 ref NM_214267.1     | turquoise | 557.15932 | 459.45293 | 0.8098774 | 0.09662605 | 19.358  |
| gnl UG Ssc#S18553548            | turquoise | 556.3649  | 427.35385 | 0.8010447 | 0.10329091 | 43.902  |
| gnl UG Ssc#S18388327            | turquoise | 556.27187 | 407.56547 | 0.7812596 | 0.1186965  | 13.258  |
| gnl UG Ssc#S40069929            | turquoise | 555.82238 | 449.14625 | 0.8094908 | 0.09691488 | 6.616   |
| gnl UG Ssc#S26732732            | black     | 554.51749 | 48.454541 | 0.9580254 | 0.01025794 | 15.878  |



|                                 |           |           |           |           |            |         |
|---------------------------------|-----------|-----------|-----------|-----------|------------|---------|
| gi 52351368 gb AY609798.1       | turquoise | 554.07758 | 530.57288 | 0.8561124 | 0.06408643 | 21.392  |
| gnl UG Ssc#S31111249            | turquoise | 551.93763 | 446.81783 | 0.8078522 | 0.0981422  | 5.724   |
| gi 52351609 gb AY610039.1       | turquoise | 551.3062  | 491.17267 | 0.831746  | 0.08072459 | 11.104  |
| gnl UG Ssc#S17509834            | green     | 550.06767 | 85.824462 | 0.9767492 | 0.00424103 | 0.846   |
| gi 194038854 ref XM_001928014.1 | turquoise | 549.65248 | 535.59351 | 0.8447079 | 0.07172555 | 31.042  |
| gi 194040173 ref XM_001926225.1 | turquoise | 549.37172 | 515.48985 | 0.8346678 | 0.07866751 | 69.34   |
| gi 166796042 ref NM_001114275.1 | turquoise | 549.08295 | 502.38573 | 0.8424146 | 0.07329363 | 33.164  |
| gi 115551894 dbj AK236301.1     | turquoise | 548.86751 | 502.41165 | 0.833739  | 0.07931962 | 9.904   |
| gi 194041780 ref XM_001925192.1 | green     | 548.85508 | 82.993438 | 0.9688967 | 0.006554   | 129.576 |
| gnl UG Ssc#S18360061            | turquoise | 547.50033 | 532.49043 | 0.848513  | 0.06914705 | 4.258   |
| gnl UG Ssc#S40145713            | turquoise | 547.12472 | 521.45975 | 0.8360037 | 0.07773244 | 10.674  |
| gnl UG Ssc#S18548660            | turquoise | 545.81597 | 392.58711 | 0.7724181 | 0.12578506 | 133.716 |
| gi 115555451 dbj AK234064.1     | green     | 545.75538 | 85.915208 | 0.9782354 | 0.00384181 | 40.964  |
| gi 194041230 ref XM_001925354.1 | turquoise | 544.2758  | 516.02791 | 0.84895   | 0.06885281 | 41.228  |
| gnl UG Ssc#S35171934            | black     | 543.56285 | 46.701382 | 0.9519327 | 0.01255893 | 20.804  |
| gi 115553328 dbj AK233126.1     | turquoise | 543.41527 | 473.11289 | 0.8190473 | 0.08985196 | 35.24   |
| gnl UG Ssc#S19538787            | turquoise | 540.38853 | 512.71525 | 0.832676  | 0.08006805 | 22.648  |
| gnl UG Ssc#S18557699            | turquoise | 540.02691 | 515.76828 | 0.8366262 | 0.07729791 | 43.262  |
| gnl UG Ssc#S40483013            | turquoise | 539.17141 | 466.34027 | 0.8117376 | 0.09523972 | 17.44   |
| gnl UG Ssc#S16516579            | turquoise | 538.88637 | 476.94159 | 0.8334548 | 0.0795195  | 5.944   |
| gi 194035852 ref XM_001929031.1 | turquoise | 538.53198 | 508.19223 | 0.8310547 | 0.0812137  | 11.414  |
| gnl UG Ssc#S40154742            | turquoise | 538.2426  | 473.34716 | 0.8243953 | 0.08597147 | 2.526   |
| gi 167908790 ref NM_001114676.1 | green     | 538.1076  | 88.994701 | 0.9844182 | 0.0023294  | 76.084  |
| gnl UG Ssc#S17510145            | turquoise | 537.90569 | 508.75119 | 0.8317847 | 0.08069724 | 9.566   |
| gi 52351323 gb AY609755.1       | green     | 536.11619 | 76.885792 | 0.951863  | 0.01258611 | 163.28  |
| gnl UG Ssc#S26733269            | turquoise | 535.54353 | 496.75255 | 0.8404449 | 0.07464881 | 115.204 |
| gnl UG Ssc#S40050849            | green     | 534.56896 | 91.512422 | 0.9914496 | 0.00094788 | 25.012  |
| gi 115547231 dbj AK234604.1     | turquoise | 534.17003 | 521.34538 | 0.8370123 | 0.07702878 | 35.262  |
| gi 115553571 dbj AK239758.1     | turquoise | 532.37555 | 395.77416 | 0.7740073 | 0.12450195 | 67.028  |
| gnl UG Ssc#S18386841            | green     | 531.70981 | 81.944678 | 0.966501  | 0.00732298 | 14.11   |
| gnl UG Ssc#S17511034            | green     | 530.41793 | 89.260548 | 0.9868052 | 0.00181583 | 15.34   |
| gi 149944498 ref NM_214343.2    | green     | 530.22133 | 91.708535 | 0.9926616 | 0.0007538  | 115.828 |
| gnl UG Ssc#S6029367             | turquoise | 529.18654 | 512.24273 | 0.8483011 | 0.0692899  | 10.64   |
| gi 115555163 dbj AK233778.1     | turquoise | 528.00402 | 510.6163  | 0.8367831 | 0.07718845 | 46.172  |
| gnl UG Ssc#S17519017            | turquoise | 527.40498 | 389.70078 | 0.7738595 | 0.12462114 | 181.912 |
| gi 115550537 dbj AK232367.1     | green     | 527.15795 | 93.866283 | 0.9976165 | 0.00013964 | 9.264   |
| gnl UG Ssc#S18283093            | turquoise | 526.98058 | 513.06429 | 0.8376358 | 0.07659473 | 20.816  |
| gi 194044289 ref XM_001926487.1 | green     | 526.06546 | 91.882716 | 0.9918115 | 0.0008884  | 99.66   |
| gnl UG Ssc#S20945959            | turquoise | 525.32674 | 441.92618 | 0.8147539 | 0.09300492 | 8.294   |
| gi 194036956 ref XM_001924342.1 | green     | 524.80343 | 89.17811  | 0.9864837 | 0.00188251 | 50.44   |
| gi 73853893 ref NM_001032358.1  | turquoise | 523.45512 | 381.71111 | 0.7678075 | 0.12952987 | 27.05   |
| gnl UG Ssc#S23758068            | turquoise | 523.35004 | 510.51373 | 0.8442925 | 0.0720088  | 20.892  |
| gnl UG Ssc#S6062152             | turquoise | 523.02078 | 368.4781  | 0.7633156 | 0.13320934 | 2.298   |
| gnl UG Ssc#S17526834            | turquoise | 522.21934 | 491.57999 | 0.823978  | 0.08627232 | 92.492  |
| gi 115553862 dbj AK236867.1     | green     | 522.1495  | 83.831035 | 0.971273  | 0.00581955 | 15.636  |
| gi 115548933 dbj AK235336.1     | turquoise | 519.74464 | 450.59882 | 0.8046377 | 0.10056343 | 28.988  |
| gi 115551027 dbj AK238888.1     | turquoise | 518.90884 | 503.89918 | 0.8339547 | 0.07916805 | 38.736  |
| gi 194044169 ref XM_001924460.1 | turquoise | 517.98944 | 470.92921 | 0.8327745 | 0.07999857 | 76.66   |

|                                 |           |           |           |           |            |         |
|---------------------------------|-----------|-----------|-----------|-----------|------------|---------|
| gnl UG Ssc#S39980075            | green     | 517.91608 | 89.042816 | 0.9856041 | 0.00206896 | 4.976   |
| gnl UG Ssc#S23758940            | green     | 517.77953 | 80.50633  | 0.9619003 | 0.00887604 | 9.488   |
| gi 115550882 dbj AK235957.1     | black     | 515.0102  | 51.474698 | 0.9729082 | 0.0053311  | 11.122  |
| gnl UG Ssc#S40173770            | turquoise | 512.51563 | 403.1935  | 0.7839143 | 0.11659227 | 112.91  |
| gnl UG Ssc#S23695171            | turquoise | 511.57881 | 353.28523 | 0.7539913 | 0.14094378 | 16.42   |
| gi 115548093 dbj AK238077.1     | black     | 511.38407 | 51.577682 | 0.9739916 | 0.00501538 | 54.798  |
| gi 52351137 gb AY609542.1       | green     | 511.17454 | 91.061622 | 0.9912645 | 0.0009788  | 13.724  |
| gi 52351621 gb AY610051.1       | turquoise | 510.33683 | 441.75892 | 0.7995081 | 0.10446403 | 66.064  |
| gnl UG Ssc#S18378241            | turquoise | 509.89969 | 383.47157 | 0.7701555 | 0.12761867 | 14.57   |
| gnl UG Ssc#S34527038            | turquoise | 509.12647 | 357.91418 | 0.7500809 | 0.14422551 | 11.942  |
| gnl UG Ssc#S23759053            | green     | 508.71527 | 84.197105 | 0.9733589 | 0.00519898 | 21.458  |
| gi 115549900 dbj AK232134.1     | turquoise | 508.43872 | 485.22618 | 0.82326   | 0.08679085 | 39.078  |
| gi 47523569 ref NM_214249.1     | black     | 508.27517 | 46.886298 | 0.9530691 | 0.01211829 | 73.918  |
| gnl UG Ssc#S17515701            | turquoise | 506.90731 | 472.99784 | 0.8333572 | 0.07958817 | 24.598  |
| gnl UG Ssc#S16763868            | turquoise | 506.83036 | 479.16536 | 0.8158353 | 0.09220765 | 20.018  |
| gnl UG Ssc#S18269927            | black     | 505.88194 | 51.941865 | 0.975472  | 0.00459434 | 10.57   |
| gnl UG Ssc#S23766692            | green     | 505.44821 | 79.035342 | 0.9577652 | 0.01035306 | 25.488  |
| gnl UG Ssc#S19547688            | turquoise | 503.19877 | 489.00098 | 0.8207504 | 0.08861051 | 26.968  |
| gi 115553726 dbj AK239913.1     | turquoise | 502.24216 | 471.35876 | 0.8137261 | 0.0937646  | 33.19   |
| gi 194041034 ref XM_001928236.1 | turquoise | 501.87074 | 440.88538 | 0.7991823 | 0.10471325 | 29.39   |
| gnl UG Ssc#S26721858            | turquoise | 499.8983  | 448.60183 | 0.8021979 | 0.10241308 | 6.156   |
| gnl UG Ssc#S19542511            | turquoise | 499.05341 | 452.41925 | 0.8034981 | 0.10142608 | 23.006  |
| gi 194042436 ref XM_001925357.1 | green     | 498.48758 | 75.858156 | 0.9484435 | 0.01394349 | 7.58    |
| gi 115553351 dbj AK233149.1     | turquoise | 495.64688 | 478.86725 | 0.8174515 | 0.09101996 | 10.498  |
| gnl UG Ssc#S18552425            | turquoise | 495.27601 | 450.27279 | 0.8048544 | 0.1003997  | 8.276   |
| gnl UG Ssc#S40096829            | turquoise | 493.67626 | 452.47599 | 0.8036325 | 0.10132426 | 107.208 |
| gnl UG Ssc#S34529604            | green     | 493.19632 | 86.072277 | 0.9778968 | 0.00393161 | 8.728   |
| gnl UG Ssc#S19548031            | green     | 493.04283 | 79.528321 | 0.9587802 | 0.00998366 | 52.144  |
| gi 56792886 gb AY705919.1       | turquoise | 492.8437  | 424.02015 | 0.7901376 | 0.11170398 | 16.088  |
| gi 115546071 dbj AK237513.1     | turquoise | 492.3392  | 371.65148 | 0.7585681 | 0.13713129 | 37.77   |
| gnl UG Ssc#S17510396            | turquoise | 489.77954 | 401.89919 | 0.7748127 | 0.1238531  | 108.826 |
| gi 115548554 dbj AK235171.1     | turquoise | 489.73684 | 465.04384 | 0.8117768 | 0.0952106  | 26.582  |
| gnl UG Ssc#S17527052            | black     | 486.5851  | 50.582163 | 0.9667426 | 0.00724417 | 21.918  |
| gi 194041036 ref XM_001925819.1 | turquoise | 483.37224 | 405.99    | 0.7910627 | 0.11098273 | 58.11   |
| gnl UG Ssc#S34502088            | turquoise | 482.19024 | 461.11075 | 0.8062506 | 0.09934635 | 16.936  |
| gi 194037272 ref XM_001928278.1 | black     | 481.12032 | 46.204501 | 0.9417294 | 0.01673689 | 24.828  |
| gi 51592138 ref NM_001004045.1  | green     | 479.59553 | 94.205959 | 0.998643  | 6.00E-05   | 122.258 |
| gi 115554312 dbj AK240107.1     | turquoise | 477.55371 | 461.83461 | 0.8105723 | 0.09610745 | 104.128 |
| gnl UG Ssc#S39959416            | turquoise | 477.18232 | 399.67643 | 0.7821138 | 0.11801818 | 18.594  |
| gi 52351116 gb AY609521.1       | green     | 476.93582 | 86.560731 | 0.9799499 | 0.00339779 | 88.722  |
| gnl UG Ssc#S15981469            | green     | 476.8335  | 87.563096 | 0.9832572 | 0.00259407 | 8.676   |
| gi 194038066 ref XM_001927909.1 | turquoise | 473.50524 | 385.0559  | 0.7644632 | 0.1322664  | 285.724 |
| gnl UG Ssc#S17518565            | turquoise | 473.03189 | 323.10706 | 0.7350477 | 0.15704493 | 11.466  |
| gnl UG Ssc#S26392759            | black     | 472.65002 | 53.176438 | 0.9815813 | 0.00299241 | 13.856  |
| gi 194043124 ref XM_001926685.1 | turquoise | 472.29564 | 325.82171 | 0.727219  | 0.16384528 | 53.926  |
| gi 164486 gb M29072.1 PIGHEP1   | black     | 472.2936  | 49.612757 | 0.9608986 | 0.00922698 | 37.332  |
| gi 194043063 ref XM_001925272.1 | turquoise | 469.95189 | 431.64687 | 0.8073727 | 0.09850225 | 27.33   |
| gi 115545827 dbj AK234260.1     | green     | 464.92695 | 86.225513 | 0.9783017 | 0.00382431 | 46.712  |

|                                 |           |           |           |           |            |         |
|---------------------------------|-----------|-----------|-----------|-----------|------------|---------|
| gi 194036611 ref XM_001926603.1 | green     | 461.82911 | 92.179282 | 0.9928299 | 0.00072803 | 26.274  |
| gnl UG Ssc#S38479783            | green     | 460.63285 | 90.977778 | 0.9907762 | 0.00106194 | 58.876  |
| gnl UG Ssc#S19546199            | turquoise | 460.50373 | 406.16523 | 0.7780741 | 0.12123625 | 2.322   |
| gi 194035412 ref XM_001925476.1 | turquoise | 459.19308 | 423.66053 | 0.7899719 | 0.11183335 | 17.888  |
| gnl UG Ssc#S18548467            | turquoise | 457.52342 | 354.39421 | 0.7565221 | 0.13883183 | 40.236  |
| gnl UG Ssc#S40020159            | turquoise | 457.03926 | 392.64219 | 0.7807213 | 0.11912457 | 200.674 |
| gnl UG Ssc#S18277539            | turquoise | 456.54984 | 439.37077 | 0.8029455 | 0.10184523 | 71.714  |
| gi 115546529 dbj AK234367.1     | turquoise | 456.48162 | 419.78145 | 0.7948687 | 0.10803025 | 54.692  |
| gi 115551880 dbj AK236287.1     | turquoise | 456.17193 | 418.08417 | 0.7956433 | 0.10743233 | 12.594  |
| gnl UG Ssc#S26726574            | turquoise | 455.8253  | 352.0664  | 0.7461256 | 0.14756731 | 10.958  |
| gi 115553231 dbj AK233029.1     | green     | 454.45965 | 71.421656 | 0.9365571 | 0.01899905 | 131.296 |
| gnl UG Ssc#S23758429            | turquoise | 453.74463 | 412.73934 | 0.7874618 | 0.11379805 | 4.632   |
| gnl UG Ssc#S17516917            | green     | 452.38466 | 87.541025 | 0.9809399 | 0.00314974 | 34.134  |
| gnl UG Ssc#S31112392            | turquoise | 451.8478  | 365.9875  | 0.7609276 | 0.13517789 | 5.462   |
| gnl UG Ssc#S24610239            | turquoise | 451.64451 | 333.17025 | 0.7398835 | 0.15288652 | 5.71    |
| gi 115545643 dbj AK230758.1     | green     | 451.61879 | 83.598924 | 0.9712861 | 0.00581558 | 111.578 |
| gnl UG Ssc#S6054625             | turquoise | 448.6196  | 308.49137 | 0.7129721 | 0.17643146 | 9.24    |
| gi 194040489 ref XM_001927223.1 | turquoise | 448.28484 | 415.09554 | 0.7830076 | 0.11730971 | 61.818  |
| gnl UG Ssc#S18383319            | green     | 447.66736 | 91.295207 | 0.990537  | 0.00110346 | 22.468  |
| gnl UG Ssc#S23695295            | turquoise | 446.3511  | 418.23846 | 0.7873595 | 0.11387835 | 18.42   |
| gi 115551449 dbj AK236127.1     | black     | 446.08442 | 49.992543 | 0.9712872 | 0.00581523 | 58.58   |
| gi 194042125 ref XM_001928342.1 | green     | 443.10401 | 93.440304 | 0.9965664 | 0.0002414  | 248.056 |
| gnl UG Ssc#S27602393            | turquoise | 442.14333 | 414.48994 | 0.797086  | 0.10632138 | 9.466   |
| gnl UG Ssc#S26399811            | turquoise | 441.85637 | 385.01268 | 0.7706494 | 0.12721773 | 44.348  |
| gnl UG Ssc#S17515039            | turquoise | 441.13549 | 401.66032 | 0.7757315 | 0.12311424 | 65.286  |
| gnl UG Ssc#S19540688            | turquoise | 440.31493 | 322.37064 | 0.7248543 | 0.16591571 | 47.45   |
| gnl UG Ssc#S29977171            | green     | 440.19584 | 89.834445 | 0.9870499 | 0.00176563 | 9.652   |
| gnl UG Ssc#S23768398            | turquoise | 439.72298 | 336.88136 | 0.7514878 | 0.14304227 | 10.506  |
| gnl UG Ssc#S18354485            | green     | 439.33445 | 87.856081 | 0.983626  | 0.00250899 | 38.448  |
| gnl UG Ssc#S40443438            | turquoise | 438.67275 | 393.79525 | 0.7732734 | 0.12509401 | 82.044  |
| gi 138753472 emb AM503091.1     | salmon    | 438.19162 | 31.7702   | 0.9119067 | 0.03096882 | 39      |
| gnl UG Ssc#S19542087            | turquoise | 437.85896 | 422.37581 | 0.78764   | 0.11365823 | 58.436  |
| gnl UG Ssc#S39855926            | turquoise | 435.82014 | 297.34735 | 0.7075921 | 0.18125336 | 3.072   |
| gnl UG Ssc#S23699860            | black     | 435.04341 | 42.861088 | 0.9223799 | 0.02565505 | 3.872   |
| gi 178057066 ref NM_001123096.1 | turquoise | 433.83624 | 390.13322 | 0.76833   | 0.1291038  | 35.644  |
| gnl UG Ssc#S31130713            | turquoise | 433.50269 | 358.02328 | 0.763529  | 0.1330339  | 5.236   |
| gnl UG Ssc#S27600609            | black     | 432.73107 | 54.806445 | 0.9896481 | 0.00126238 | 3.208   |
| gi 194038781 ref XM_001926473.1 | green     | 431.8559  | 57.699815 | 0.8918982 | 0.04196745 | 123.242 |
| gnl UG Ssc#S18547360            | turquoise | 431.80028 | 381.78107 | 0.7818214 | 0.11825023 | 35.708  |
| gi 115552523 dbj AK236528.1     | green     | 430.23586 | 88.783528 | 0.9842708 | 0.00236248 | 62.132  |
| gi 194036317 ref XM_001927969.1 | black     | 429.45655 | 53.097564 | 0.981324  | 0.00305521 | 19.514  |
| gnl UG Ssc#S18357511            | turquoise | 428.61246 | 331.01493 | 0.7300868 | 0.16134451 | 94.798  |
| gi 115554826 dbj AK233638.1     | black     | 428.46534 | 54.695535 | 0.9904074 | 0.0011262  | 129.538 |
| gnl UG Ssc#S22275082            | turquoise | 427.6352  | 323.69283 | 0.7365938 | 0.15571191 | 30.434  |
| gnl UG Ssc#S6076898             | black     | 427.62412 | 50.611698 | 0.9675864 | 0.00697112 | 54.588  |
| gnl UG Ssc#S18549545            | green     | 426.74184 | 88.742906 | 0.9848712 | 0.0022287  | 9.8     |
| gi 115551607 dbj AK239071.1     | green     | 426.15415 | 76.861548 | 0.9525447 | 0.01232099 | 35.644  |
| gnl UG Ssc#S16769299            | green     | 425.51603 | 89.611428 | 0.9877933 | 0.00161597 | 24.592  |

|                                 |           |           |           |           |            |         |
|---------------------------------|-----------|-----------|-----------|-----------|------------|---------|
| gi 52351069 gb AY609474.1       | green     | 423.42736 | 90.504518 | 0.9890265 | 0.00137764 | 27.14   |
| gi 194040672 ref XM_001925213.1 | black     | 421.29119 | 53.420626 | 0.9845824 | 0.00229273 | 1.416   |
| gnl UG Ssc#S18546487            | green     | 421.26773 | 91.164801 | 0.9910667 | 0.0010122  | 29.372  |
| gi 115549313 dbj AK235234.1     | turquoise | 420.5498  | 386.94457 | 0.7675082 | 0.12977407 | 112.252 |
| gnl UG Ssc#S18382475            | green     | 418.888   | 81.685228 | 0.9658119 | 0.0075493  | 21.686  |
| gi 194038904 ref XM_001924445.1 | green     | 418.1117  | 87.395387 | 0.9816713 | 0.00297053 | 159.486 |
| gnl UG Ssc#S31101896            | turquoise | 416.6774  | 386.33149 | 0.7646737 | 0.13209368 | 62.074  |
| gnl UG Ssc#S18380653            | turquoise | 416.64781 | 347.30413 | 0.7511764 | 0.14330385 | 10.602  |
| gi 72535167 ref NM_001031778.1  | darkgrey  | 416.56767 | 13.932673 | 0.9315346 | 0.02128285 | 20.544  |
| gnl UG Ssc#S18386541            | green     | 413.8092  | 89.101438 | 0.9875828 | 0.0016579  | 39.036  |
| gnl UG Ssc#S18356685            | green     | 413.3819  | 90.087723 | 0.9892121 | 0.00134287 | 2.298   |
| gnl UG Ssc#S18359197            | turquoise | 412.8189  | 389.20818 | 0.7920456 | 0.11021795 | 4.754   |
| gnl UG Ssc#S18270450            | turquoise | 412.14676 | 331.19436 | 0.7403061 | 0.15252472 | 0.9     |
| gnl UG Ssc#S23758924            | green     | 411.25381 | 89.993507 | 0.987981  | 0.00157889 | 32.182  |
| gnl UG Ssc#S17506191            | green     | 407.51509 | 80.23648  | 0.9635635 | 0.00830329 | 37.914  |
| gi 194043947 ref XM_001925017.1 | turquoise | 405.96581 | 390.41793 | 0.7890772 | 0.11253249 | 20.802  |
| gi 115548922 dbj AK235325.1     | green     | 405.14346 | 58.866318 | 0.8964812 | 0.03935514 | 374.856 |
| gi 115552473 dbj AK236478.1     | black     | 404.82613 | 55.315244 | 0.9958688 | 0.00031855 | 88.174  |
| gnl UG Ssc#S18387783            | turquoise | 404.69319 | 351.58007 | 0.7434968 | 0.14980075 | 42.406  |
| gi 194043042 ref XM_001926896.1 | turquoise | 403.29287 | 303.1167  | 0.7087926 | 0.1801742  | 54.042  |
| gi 115551807 dbj AK236213.1     | turquoise | 402.38797 | 296.4766  | 0.7085529 | 0.18038949 | 4.306   |
| gnl UG Ssc#S17503526            | green     | 399.61054 | 82.843766 | 0.9719365 | 0.00561965 | 28.852  |
| gnl UG Ssc#S34508066            | turquoise | 399.54804 | 373.56484 | 0.7625171 | 0.13386664 | 11.008  |
| gnl UG Ssc#S40157220            | green     | 398.54533 | 68.411481 | 0.9296026 | 0.02218344 | 99.586  |
| gi 194041366 ref XM_001924481.1 | turquoise | 396.89356 | 311.26856 | 0.7162287 | 0.17353092 | 54.382  |
| gnl UG Ssc#S39891679            | green     | 396.33834 | 79.14417  | 0.9583383 | 0.01014395 | 140.328 |
| gi 194043006 ref XM_001928075.1 | green     | 396.32863 | 85.107702 | 0.978001  | 0.0039039  | 26.19   |
| gi 194044285 ref XM_001926002.1 | green     | 392.9474  | 89.437235 | 0.9873866 | 0.0016973  | 27.228  |
| gnl UG Ssc#S19542622            | turquoise | 392.19267 | 318.62498 | 0.7216564 | 0.1687275  | 19.428  |
| gi 115552250 dbj AK230559.1     | turquoise | 390.80755 | 339.07313 | 0.7374634 | 0.15496355 | 134.72  |
| gnl UG Ssc#S40520406            | green     | 389.75831 | 77.532289 | 0.9529144 | 0.01217795 | 30.54   |
| gnl UG Ssc#S18261767            | black     | 389.19287 | 49.35509  | 0.9601292 | 0.00949951 | 10.594  |
| gi 73853881 ref NM_001032355.1  | turquoise | 389.16046 | 300.41015 | 0.7104738 | 0.17866595 | 25.116  |
| gnl UG Ssc#S18387558            | black     | 387.12555 | 56.332848 | 0.9990694 | 3.41E-05   | 75.398  |
| gi 148747452 ref NM_001098603.1 | green     | 386.71334 | 66.201641 | 0.9198029 | 0.02693254 | 17.67   |
| gi 52351777 gb AY610207.1       | turquoise | 386.67426 | 345.36557 | 0.7400654 | 0.15273077 | 19.096  |
| gnl UG Ssc#S23770611            | turquoise | 385.178   | 283.39502 | 0.7039819 | 0.18450968 | 25.742  |
| gnl UG Ssc#S23695269            | turquoise | 383.31171 | 333.38657 | 0.7310735 | 0.16048667 | 9.818   |
| gi 115546465 dbj AK230984.1     | turquoise | 382.52526 | 340.52343 | 0.734814  | 0.15724677 | 148.926 |
| gnl UG Ssc#S41446582            | green     | 382.40538 | 87.103776 | 0.9805825 | 0.00323859 | 50.526  |
| gnl UG Ssc#S29987869            | black     | 381.13175 | 46.675864 | 0.9452707 | 0.01524283 | 15.098  |
| gi 115554133 dbj AK233343.1     | turquoise | 379.23237 | 352.65222 | 0.7436091 | 0.14970512 | 67.742  |
| gnl UG Ssc#S17500137            | green     | 378.25495 | 87.33498  | 0.9826131 | 0.00274492 | 7.274   |
| gnl UG Ssc#S40159132            | turquoise | 377.99276 | 348.45785 | 0.7456942 | 0.14793312 | 5.432   |
| gnl UG Ssc#S39994120            | turquoise | 375.29054 | 343.41077 | 0.7394068 | 0.15329504 | 22.748  |
| gi 115545622 dbj AK230737.1     | turquoise | 374.31108 | 277.81452 | 0.7015727 | 0.18669192 | 44.822  |
| gi 77745211 gb DQ222847.1       | black     | 372.64487 | 51.114583 | 0.9751684 | 0.00467969 | 13.308  |
| gi 115552411 dbj AK236416.1     | green     | 371.94819 | 77.414337 | 0.9541842 | 0.01169095 | 56.268  |

|                                 |             |           |           |           |            |         |
|---------------------------------|-------------|-----------|-----------|-----------|------------|---------|
| gi 114326213 ref NM_001048069.1 | green       | 371.66243 | 75.441404 | 0.9470287 | 0.01451824 | 44.224  |
| gnl UG Ssc#S40268747            | blue        | 370.51845 | 170.11949 | 0.9529174 | 0.0121768  | 1.954   |
| gi 52351606 gb AY610036.1       | black       | 369.77221 | 55.697762 | 0.9954675 | 0.00036605 | 3.846   |
| gi 115547390 dbj AK237771.1     | turquoise   | 369.76824 | 337.87151 | 0.7367814 | 0.15555034 | 17.004  |
| gnl UG Ssc#S6075066             | blue        | 369.19274 | 163.55741 | 0.9433177 | 0.01606117 | 86.122  |
| gi 190360646 ref NM_001128455.1 | blue        | 369.09785 | 170.60201 | 0.9536843 | 0.01188188 | 11.346  |
| gi 115550441 dbj AK238706.1     | turquoise   | 369.00426 | 330.93397 | 0.7281506 | 0.16303167 | 71.08   |
| gnl UG Ssc#S17526922            | blue        | 368.56822 | 158.46518 | 0.9364259 | 0.01905765 | 6.986   |
| gnl UG Ssc#S26392586            | blue        | 368.24377 | 156.59863 | 0.9336474 | 0.02031191 | 9.234   |
| gnl UG Ssc#S6666554             | darkred     | 368.01834 | 34.078868 | 0.9874356 | 0.00168744 | 13.39   |
| gi 52351995 gb AY610411.1       | turquoise   | 367.8995  | 243.08253 | 0.6683227 | 0.217532   | 11.238  |
| gi 52351490 gb AY609920.1       | magenta     | 367.51661 | 11.823045 | -0.365511 | 0.54519745 | 32.972  |
| gi 115552930 dbj AK239524.1     | green       | 367.42797 | 84.009723 | 0.974826  | 0.00477657 | 15.518  |
| gnl UG Ssc#S40215563            | blue        | 367.11998 | 189.56468 | 0.9794634 | 0.00352196 | 7.45    |
| gnl UG Ssc#S26720841            | blue        | 366.88453 | 181.52834 | 0.9690951 | 0.0064916  | 27.55   |
| gnl UG Ssc#S6075552             | darkred     | 366.60342 | 34.057715 | 0.9870264 | 0.00177044 | 8.896   |
| gnl UG Ssc#S32771805            | blue        | 366.38647 | 189.62381 | 0.9796327 | 0.00347859 | 6.94    |
| gi 194037603 ref XM_001927821.1 | green       | 366.35555 | 80.216315 | 0.9609628 | 0.00920432 | 103.528 |
| gnl UG Ssc#S17524990            | blue        | 366.24678 | 164.08066 | 0.9441426 | 0.01571383 | 45.052  |
| gnl UG Ssc#S18549905            | white       | 366.05938 | 24.980907 | 0.9731473 | 0.00526089 | 27.608  |
| gnl UG Ssc#S40091442            | grey60      | 365.93225 | 14.198292 | 0.7426603 | 0.15051345 | 1.428   |
| gi 163310772 ref NM_001097521.2 | blue        | 365.70342 | 182.60285 | 0.9706173 | 0.00601933 | 57.542  |
| gnl UG Ssc#S18381103            | green       | 365.52295 | 85.32737  | 0.9770471 | 0.00415998 | 17.75   |
| gi 194037682 ref XM_001927000.1 | blue        | 365.00824 | 176.72383 | 0.9627972 | 0.00856562 | 122.908 |
| gnl UG Ssc#S18356013            | white       | 364.99449 | 22.860558 | 0.9554206 | 0.01122304 | 16.624  |
| gnl UG Ssc#S26726120            | blue        | 364.51061 | 157.43158 | 0.9352906 | 0.01956697 | 17.24   |
| gnl UG Ssc#S40210420            | black       | 364.18592 | 54.358922 | 0.9931345 | 0.00068218 | 25.954  |
| gnl UG Ssc#S18557837            | blue        | 364.15447 | 183.97052 | 0.9726268 | 0.00541415 | 198.92  |
| gnl UG Ssc#S40191766            | turquoise   | 363.88943 | 317.15148 | 0.7203454 | 0.16988412 | 2.222   |
| gnl UG Ssc#S23697932            | blue        | 363.22223 | 170.90681 | 0.9547994 | 0.01145734 | 47.392  |
| gi 115548217 dbj AK231527.1     | darkturquoi | 363.17033 | 26.141834 | 0.9621267 | 0.00879734 | 17.182  |
| gnl UG Ssc#S40064881            | blue        | 363.15918 | 193.43458 | 0.9844466 | 0.00232303 | 8.05    |
| gnl UG Ssc#S40453605            | blue        | 362.86239 | 184.08897 | 0.9728601 | 0.00534527 | 4.894   |
| gnl UG Ssc#S39851973            | darkturquoi | 362.61111 | 27.426725 | 0.9718957 | 0.00563187 | 20.708  |
| gnl UG Ssc#S19539102            | blue        | 362.11314 | 170.75715 | 0.9547262 | 0.01148506 | 4.474   |
| gnl UG Ssc#S40239504            | blue        | 362.03938 | 187.84754 | 0.9771759 | 0.00412506 | 14.546  |
| gnl UG Ssc#S19542751            | turquoise   | 362.00491 | 291.97817 | 0.6994744 | 0.18859852 | 25.32   |
| gi 52351660 gb AY610090.1       | blue        | 361.90177 | 176.2346  | 0.9623202 | 0.00873026 | 3.19    |
| gi 115554376 dbj AK233386.1     | blue        | 361.7914  | 170.65271 | 0.9536108 | 0.01191005 | 36.966  |
| gi 115552260 dbj AK230569.1     | blue        | 360.81639 | 178.54318 | 0.9647033 | 0.00791814 | 114.53  |
| gi 4186150 emb AJ236938.1       | blue        | 360.70407 | 194.56329 | 0.9860287 | 0.00197822 | 25.462  |
| gi 115553748 dbj AK239935.1     | blue        | 360.60196 | 181.02863 | 0.9688399 | 0.00657192 | 31.144  |
| gi 194040884 ref XM_001924115.1 | blue        | 360.3349  | 172.21689 | 0.9558367 | 0.01106694 | 15.926  |
| gi 194037354 ref XM_001926198.1 | blue        | 360.25007 | 195.32971 | 0.9872037 | 0.0017343  | 37.11   |
| gi 115552309 dbj AK230619.1     | darkred     | 360.14689 | 35.59045  | 0.9964815 | 0.0002504  | 200.272 |
| gnl UG Ssc#S34529284            | blue        | 359.93106 | 167.81708 | 0.9497343 | 0.01342577 | 18.74   |
| gnl UG Ssc#S40017556            | blue        | 359.53828 | 190.47435 | 0.9811819 | 0.00309008 | 2.036   |
| gnl UG Ssc#S18379116            | green       | 359.4928  | 82.846217 | 0.9691999 | 0.00645871 | 111.832 |

|                                 |             |           |           |           |            |         |
|---------------------------------|-------------|-----------|-----------|-----------|------------|---------|
| gi 52352707 gb AY609627.1       | turquoise   | 359.27873 | 267.82787 | 0.6867005 | 0.20032233 | 13.064  |
| gnl UG Ssc#S17526185            | darkred     | 359.22729 | 35.62801  | 0.9967925 | 0.00021796 | 3.292   |
| gnl UG Ssc#S39996844            | blue        | 359.04391 | 176.1709  | 0.9623542 | 0.00871847 | 64.698  |
| gi 194036224 ref XM_001929641.1 | blue        | 359.00756 | 166.5636  | 0.9490599 | 0.01369545 | 78.062  |
| gi 194041087 ref XM_001927225.1 | blue        | 358.97404 | 194.77694 | 0.9867202 | 0.00183339 | 15.936  |
| gnl UG Ssc#S23758955            | turquoise   | 358.5403  | 309.95645 | 0.7159164 | 0.17380849 | 43.942  |
| gi 194036639 ref XM_001924618.1 | blue        | 358.51117 | 183.64635 | 0.9723155 | 0.00550652 | 74.728  |
| gnl UG Ssc#S26713880            | blue        | 358.25767 | 175.65592 | 0.962018  | 0.00883508 | 12.588  |
| gnl UG Ssc#S35166313            | blue        | 358.16557 | 191.16745 | 0.981712  | 0.00296066 | 1.328   |
| gi 108796051 ref NM_213912.2    | darkturquoi | 358.11439 | 27.856939 | 0.9748068 | 0.00478201 | 349.102 |
| gnl UG Ssc#S18383248            | black       | 357.58978 | 51.742086 | 0.9753319 | 0.00463365 | 120.134 |
| gnl UG Ssc#S18291250            | darkgrey    | 357.46995 | 15.421653 | 0.9552717 | 0.01127902 | 7.026   |
| gnl UG Ssc#S18557247            | turquoise   | 357.27817 | 290.69361 | 0.6978904 | 0.19004138 | 67.11   |
| gi 115552482 dbj AK236487.1     | blue        | 357.21822 | 175.46282 | 0.9618389 | 0.0088974  | 3.304   |
| gi 115552097 dbj AK239290.1     | salmon      | 357.05681 | 40.522842 | 0.9641799 | 0.00809424 | 119.648 |
| gnl UG Ssc#S40094148            | lightyellow | 356.95023 | 33.570878 | 0.993507  | 0.00062745 | 8.678   |
| gi 115548869 dbj AK235272.1     | blue        | 356.66925 | 191.82012 | 0.9831431 | 0.0026206  | 13.528  |
| gnl UG Ssc#S29976380            | turquoise   | 356.50118 | 275.55109 | 0.7072816 | 0.18153274 | 8.376   |
| gnl UG Ssc#S23775351            | blue        | 356.48324 | 183.2327  | 0.9720833 | 0.00557574 | 14.512  |
| gnl UG Ssc#S31107148            | blue        | 356.43589 | 168.0722  | 0.9514337 | 0.01275403 | 4.75    |
| gnl UG Ssc#S16766234            | blue        | 356.13256 | 178.26466 | 0.9642966 | 0.00805488 | 1.6     |
| gnl UG Ssc#S35167435            | blue        | 356.10511 | 189.93353 | 0.9807625 | 0.00319374 | 6.172   |
| gnl UG Ssc#S17510588            | green       | 355.86246 | 81.364516 | 0.9682756 | 0.00675065 | 14.564  |
| gi 115552415 dbj AK236420.1     | darkred     | 355.73768 | 34.26091  | 0.9881217 | 0.00155128 | 7.968   |
| gnl UG Ssc#S6007055             | darkred     | 355.56109 | 34.060697 | 0.9865076 | 0.00187752 | 8.298   |
| gnl UG Ssc#S5999689             | blue        | 354.63224 | 198.70651 | 0.992074  | 0.00084605 | 1.134   |
| gnl UG Ssc#S18383932            | darkred     | 354.43921 | 35.22077  | 0.9937818 | 0.00058806 | 112.768 |
| gi 194042373 ref XM_001925458.1 | darkred     | 354.41469 | 32.666803 | 0.9772896 | 0.00409436 | 25.596  |
| gnl UG Ssc#S18354663            | blue        | 354.28572 | 173.36955 | 0.958518  | 0.01007865 | 8.992   |
| gnl UG Ssc#S40149693            | blue        | 354.25342 | 167.84804 | 0.9512917 | 0.0128097  | 94.116  |
| gnl UG Ssc#S40039737            | black       | 354.02484 | 53.064805 | 0.9885906 | 0.00146044 | 14.846  |
| gnl UG Ssc#S23775370            | green       | 353.81498 | 67.40555  | 0.922077  | 0.02580416 | 31.43   |
| gi 115549499 dbj AK235521.1     | turquoise   | 353.63098 | 285.48607 | 0.6947987 | 0.19286658 | 17.57   |
| gnl UG Ssc#S18357539            | turquoise   | 353.61516 | 228.08875 | 0.6557709 | 0.22950928 | 20.812  |
| gnl UG Ssc#S18545870            | blue        | 353.59406 | 174.9412  | 0.9613397 | 0.00907189 | 11.806  |
| gnl UG Ssc#S18354111            | salmon      | 353.48386 | 40.020625 | 0.960506  | 0.00936573 | 8.064   |
| gi 115551923 dbj AK236330.1     | blue        | 352.73449 | 202.00455 | 0.9960643 | 0.00029622 | 3.62    |
| gnl UG Ssc#S17510077            | darkred     | 352.34364 | 33.016424 | 0.9794871 | 0.00351588 | 27.414  |
| gnl UG Ssc#S23766507            | blue        | 352.33201 | 174.84919 | 0.9609424 | 0.00921153 | 19.38   |
| gi 115555420 dbj AK234033.1     | blue        | 352.28767 | 201.47767 | 0.9954708 | 0.00036565 | 21.762  |
| gnl UG Ssc#S23695102            | blue        | 352.20447 | 201.03787 | 0.9948844 | 0.00043888 | 47.888  |
| gi 115550054 dbj AK232289.1     | darkred     | 352.14574 | 30.298978 | 0.9610362 | 0.0091785  | 7.03    |
| gi 194038023 ref XM_001928502.1 | white       | 351.80326 | 25.704115 | 0.9850063 | 0.00219896 | 71.2    |
| gi 194040485 ref XM_001926913.1 | darkred     | 351.75298 | 35.753687 | 0.9975705 | 0.0001437  | 16.556  |
| gnl UG Ssc#S18548560            | blue        | 351.67851 | 186.20552 | 0.9761904 | 0.00439444 | 13.604  |
| gnl UG Ssc#S18554258            | lightyellow | 351.49674 | 33.98025  | 0.9957863 | 0.00032814 | 38.596  |
| gnl UG Ssc#S6072016             | blue        | 351.25062 | 197.13342 | 0.9901977 | 0.00116329 | 3.782   |
| gnl UG Ssc#S40153033            | blue        | 351.05799 | 199.31247 | 0.9930589 | 0.00069347 | 4.226   |

|                                 |             |           |           |           |            |          |
|---------------------------------|-------------|-----------|-----------|-----------|------------|----------|
| gnl UG Ssc#S17510796            | blue        | 350.89959 | 201.03476 | 0.9946893 | 0.00046421 | 9.65     |
| gnl UG Ssc#S6027765             | darkred     | 350.47406 | 31.936431 | 0.9721985 | 0.00554137 | 2.646    |
| gi 115552865 dbj AK239459.1     | darkturquoi | 350.46742 | 29.173797 | 0.9855365 | 0.00208353 | 21.222   |
| gnl UG Ssc#S40051540            | blue        | 350.3403  | 188.38479 | 0.9791255 | 0.00360905 | 13.832   |
| gi 115549440 dbj AK235462.1     | blue        | 350.08333 | 166.18942 | 0.9487292 | 0.01382835 | 142.348  |
| gnl UG Ssc#S40472465            | darkred     | 349.88884 | 33.651239 | 0.9837784 | 0.00247409 | 28.786   |
| gi 194040977 ref XM_001927185.1 | lightyellow | 349.84029 | 33.017731 | 0.9890383 | 0.00137542 | 19.958   |
| gi 194037065 ref XM_001927928.1 | turquoise   | 349.6438  | 332.3609  | 0.7314298 | 0.1601772  | 24.896   |
| gi 47523443 ref NM_214181.1     | darkturquoi | 349.57129 | 27.804615 | 0.9734996 | 0.00515796 | 16.758   |
| gnl UG Ssc#S40133187            | turquoise   | 349.47085 | 240.33364 | 0.6535251 | 0.23167077 | 2.742    |
| gnl UG Ssc#S18554897            | blue        | 349.30825 | 199.52887 | 0.9928058 | 0.00073171 | 38.686   |
| gnl UG Ssc#S40042631            | blue        | 349.19965 | 171.06425 | 0.9561578 | 0.01094701 | 1125.238 |
| gnl UG Ssc#S18553939            | turquoise   | 349.15344 | 276.16159 | 0.692138  | 0.19530739 | 16.442   |
| gnl UG Ssc#S40060840            | blue        | 348.88145 | 198.15519 | 0.9918802 | 0.00087726 | 55.604   |
| gnl UG Ssc#S18555613            | turquoise   | 348.8721  | 278.66398 | 0.6911434 | 0.19622199 | 26.39    |
| gnl UG Ssc#S6057322             | blue        | 348.86978 | 189.2427  | 0.9799117 | 0.00340749 | 4.088    |
| gnl UG Ssc#S29979787            | blue        | 348.80961 | 192.18876 | 0.9840168 | 0.00241982 | 1.562    |
| gnl UG Ssc#S39928606            | blue        | 348.69803 | 198.04966 | 0.9915146 | 0.00093711 | 0.468    |
| gnl UG Ssc#S40583885            | blue        | 348.61799 | 196.34335 | 0.9893448 | 0.00131821 | 12.152   |
| gi 194034521 ref XM_001926126.1 | green       | 348.61735 | 80.755    | 0.963403  | 0.00835804 | 66.172   |
| gi 52351701 gb AY610131.1       | darkturquoi | 348.54379 | 25.959601 | 0.9573626 | 0.01050082 | 33.638   |
| gi 115545859 dbj AK234292.1     | green       | 348.31473 | 74.915159 | 0.9495486 | 0.01349988 | 82.328   |
| gnl UG Ssc#S32800732            | darkred     | 348.17975 | 34.822419 | 0.991844  | 0.00088311 | 71.696   |
| gnl UG Ssc#S17527454            | blue        | 347.77775 | 199.34414 | 0.9927329 | 0.00074285 | 14.174   |
| gi 194042562 ref XM_001925435.1 | blue        | 347.7404  | 201.05509 | 0.9952434 | 0.00039352 | 6.956    |
| gnl UG Ssc#S19545494            | darkred     | 347.63534 | 35.997754 | 0.998758  | 5.25E-05   | 12.532   |
| gi 115552627 dbj AK232832.1     | blue        | 347.44425 | 174.15772 | 0.9604326 | 0.00939173 | 9.73     |
| gnl UG Ssc#S18359075            | darkred     | 347.41321 | 32.304206 | 0.9749922 | 0.00472946 | 11.152   |
| gnl UG Ssc#S35169280            | blue        | 347.26331 | 170.30454 | 0.9547854 | 0.01146262 | 10.86    |
| gi 113205635 ref NM_001044548.1 | darkred     | 347.14061 | 36.030359 | 0.999205  | 2.69E-05   | 14.738   |
| gnl UG Ssc#S40154377            | blue        | 347.13722 | 200.74601 | 0.9949167 | 0.00043474 | 0.544    |
| gnl UG Ssc#S17511660            | darkred     | 347.12674 | 34.839273 | 0.9922195 | 0.00082289 | 2.984    |
| gnl UG Ssc#S40172065            | magenta     | 346.86075 | 29.685341 | 0.91956   | 0.02705397 | 27.23    |
| gi 115553025 dbj AK239611.1     | blue        | 346.54625 | 162.98618 | 0.9448619 | 0.015413   | 136.016  |
| gi 194042013 ref XM_001925277.1 | turquoise   | 346.51584 | 325.22064 | 0.7311085 | 0.16045624 | 26.854   |
| gnl UG Ssc#S40483020            | blue        | 346.49342 | 182.70727 | 0.9725891 | 0.00542532 | 6.848    |
| gi 115547780 dbj AK234756.1     | blue        | 346.45972 | 203.28297 | 0.9978386 | 0.00012058 | 1.824    |
| gi 115550393 dbj AK238658.1     | blue        | 346.41352 | 204.28177 | 0.9992263 | 2.58E-05   | 3.912    |
| gnl UG Ssc#S31133660            | darkred     | 346.28472 | 31.949137 | 0.974206  | 0.00495365 | 22.726   |
| gi 178057315 ref NM_001123097.1 | salmon      | 346.16171 | 41.317343 | 0.9698469 | 0.00625688 | 75.254   |
| gnl UG Ssc#S26712023            | darkred     | 346.00016 | 35.430085 | 0.9956498 | 0.0003442  | 2.818    |
| gnl UG Ssc#S23756108            | salmon      | 345.90441 | 41.74733  | 0.9712923 | 0.0058137  | 15.668   |
| gi 115550804 dbj AK235879.1     | turquoise   | 345.71997 | 316.00594 | 0.7430308 | 0.1501977  | 12.506   |
| gi 60097952 ref NM_001012406.1  | blue        | 345.66428 | 196.82025 | 0.9901087 | 0.00117915 | 16.962   |
| gnl UG Ssc#S18263925            | blue        | 345.59976 | 198.47212 | 0.9917608 | 0.00089665 | 1.24     |
| gi 115553495 dbj AK236698.1     | white       | 345.5913  | 25.135352 | 0.9805022 | 0.00325865 | 57.332   |
| gnl UG Ssc#S31120434            | blue        | 345.56375 | 191.21546 | 0.98305   | 0.0026423  | 1.78     |
| gnl UG Ssc#S40110683            | blue        | 345.26497 | 198.40048 | 0.9924595 | 0.00078513 | 38.494   |

|                                 |             |           |           |           |            |         |
|---------------------------------|-------------|-----------|-----------|-----------|------------|---------|
| gi 115546292 dbj AK240530.1     | lightyellow | 345.08171 | 34.561116 | 0.9993134 | 2.16E-05   | 39.326  |
| gi 115553080 dbj AK239666.1     | turquoise   | 344.72904 | 273.39763 | 0.6909015 | 0.1964447  | 14.65   |
| gnl UG Ssc#S40478259            | blue        | 344.2656  | 201.34546 | 0.9957454 | 0.00033292 | 42.382  |
| gnl UG Ssc#S23758349            | magenta     | 343.54938 | 31.651582 | 0.9389761 | 0.01792951 | 38.09   |
| gnl UG Ssc#S40312675            | blue        | 342.32044 | 199.52243 | 0.9939828 | 0.00055981 | 20.688  |
| gnl UG Ssc#S18379252            | blue        | 342.30815 | 204.28213 | 0.9995186 | 1.27E-05   | 19.29   |
| gi 47523723 ref NM_214332.1     | blue        | 342.23371 | 203.62895 | 0.9985219 | 6.82E-05   | 152.87  |
| gnl UG Ssc#S17526987            | blue        | 342.2061  | 179.41722 | 0.9685948 | 0.00664937 | 43.722  |
| gnl UG Ssc#S23755373            | white       | 342.03562 | 27.38695  | 0.9915675 | 0.00092836 | 4.622   |
| gi 115555058 dbj AK240257.1     | magenta     | 341.7857  | 30.829015 | 0.9411806 | 0.0169725  | 47.928  |
| gnl UG Ssc#S40214545            | white       | 341.78024 | 26.151249 | 0.980565  | 0.00324294 | 20.572  |
| gnl UG Ssc#S18357398            | magenta     | 341.30302 | 32.580129 | 0.9471461 | 0.01447027 | 24.958  |
| gi 56606056 ref NM_001008481.1  | lightyellow | 341.28284 | 34.344034 | 0.9977143 | 0.00013113 | 46.332  |
| gnl UG Ssc#S17526265            | turquoise   | 341.26003 | 266.35878 | 0.6767253 | 0.20961438 | 18.534  |
| gnl UG Ssc#S6085659             | blue        | 340.92452 | 204.16958 | 0.9994154 | 1.70E-05   | 6.87    |
| gnl UG Ssc#S40034650            | black       | 340.88227 | 50.651046 | 0.9744853 | 0.0048736  | 23.262  |
| gnl UG Ssc#S19546165            | blue        | 340.81412 | 154.6308  | 0.9304991 | 0.02176404 | 37.032  |
| gnl UG Ssc#S34521528            | magenta     | 340.69916 | 31.100653 | 0.9371219 | 0.01874751 | 11.652  |
| gnl UG Ssc#S23698843            | blue        | 340.49188 | 192.51539 | 0.9849514 | 0.00221102 | 2.62    |
| gnl UG Ssc#S23769348            | blue        | 340.05483 | 158.10873 | 0.937279  | 0.01867775 | 5.844   |
| gnl UG Ssc#S23693714            | green       | 340.03061 | 70.28444  | 0.933691  | 0.02029201 | 81.758  |
| gnl UG Ssc#S39772429            | white       | 339.96546 | 27.54092  | 0.9958973 | 0.00031526 | 43.988  |
| gnl UG Ssc#S35325947            | blue        | 339.93318 | 202.91292 | 0.9981245 | 9.75E-05   | 3.736   |
| gi 115553527 dbj AK236730.1     | blue        | 339.81777 | 197.32465 | 0.9906312 | 0.00108705 | 13.482  |
| gi 115547541 dbj AK237923.1     | magenta     | 339.79211 | 29.747349 | 0.9106949 | 0.03160412 | 361.506 |
| gnl UG Ssc#S17510046            | darkgrey    | 339.59768 | 15.094287 | 0.9406716 | 0.01719193 | 33.752  |
| gi 208610189 ref NM_001135680.1 | turquoise   | 339.51997 | 322.75084 | 0.7493724 | 0.14482244 | 51.706  |
| gnl UG Ssc#S17512211            | blue        | 339.37176 | 198.30862 | 0.9918436 | 0.00088318 | 0.892   |
| gi 209863046 ref NM_001135965.1 | darkturquoi | 339.28713 | 28.440228 | 0.9790001 | 0.00364157 | 32.16   |
| gnl UG Ssc#S18553195            | turquoise   | 339.26019 | 221.88441 | 0.6342823 | 0.25041555 | 127.936 |
| gnl UG Ssc#S23690384            | blue        | 339.17238 | 188.26884 | 0.9790924 | 0.00361762 | 0.662   |
| gnl UG Ssc#S6063101             | blue        | 339.16256 | 201.31206 | 0.9963885 | 0.00026039 | 7.798   |
| gnl UG Ssc#S17514667            | lightyellow | 339.15955 | 30.109966 | 0.9679765 | 0.00684604 | 21.104  |
| gnl UG Ssc#S41575095            | turquoise   | 339.06307 | 278.33569 | 0.6905135 | 0.19680188 | 24.898  |
| gnl UG Ssc#S40106980            | blue        | 339.01802 | 195.91949 | 0.9886655 | 0.0014461  | 3.834   |
| gnl UG Ssc#S17518466            | blue        | 337.89917 | 184.85167 | 0.974034  | 0.00500313 | 14.352  |
| gnl UG Ssc#S40288165            | lightyellow | 337.89752 | 33.680487 | 0.9930954 | 0.00068801 | 5.066   |
| gi 115550999 dbj AK238860.1     | darkred     | 337.75233 | 34.409654 | 0.9892948 | 0.00132748 | 45.242  |
| gnl UG Ssc#S19538990            | black       | 337.72195 | 52.432071 | 0.9789034 | 0.0036667  | 6.618   |
| gi 194041588 ref XM_001927189.1 | blue        | 337.67335 | 182.06997 | 0.9703247 | 0.00610919 | 28.9    |
| gnl UG Ssc#S19547691            | magenta     | 337.66578 | 31.740237 | 0.9490325 | 0.01370648 | 104.022 |
| gnl UG Ssc#S17527442            | turquoise   | 337.49568 | 251.49995 | 0.6727894 | 0.21331292 | 3.408   |
| gnl UG Ssc#S17513694            | lightyellow | 337.43674 | 30.295523 | 0.9688067 | 0.00658239 | 7.858   |
| gnl UG Ssc#S26651783            | blue        | 337.26162 | 201.14987 | 0.9958946 | 0.00031558 | 11.066  |
| gnl UG Ssc#S22317157            | blue        | 337.01678 | 176.67246 | 0.9644493 | 0.00800343 | 18.314  |
| gnl UG Ssc#S19545704            | darkgrey    | 336.98095 | 15.264936 | 0.9475793 | 0.01429366 | 16.692  |
| gnl UG Ssc#S19546082            | lightyellow | 336.90062 | 34.393915 | 0.998163  | 9.45E-05   | 78.67   |
| gnl UG Ssc#S40042081            | blue        | 336.85624 | 198.18045 | 0.9923335 | 0.00080488 | 7.116   |



|                                 |             |           |           |           |            |         |
|---------------------------------|-------------|-----------|-----------|-----------|------------|---------|
| gnl UG Ssc#S18268314            | lightyellow | 336.51489 | 33.17474  | 0.9898359 | 0.00122821 | 11.634  |
| gnl UG Ssc#S40132479            | darkturquoi | 336.50256 | 27.725262 | 0.9713643 | 0.0057919  | 6.64    |
| gi 52352072 gb AY610488.1       | turquoise   | 336.50168 | 236.03945 | 0.6492887 | 0.23576333 | 27.326  |
| gnl UG Ssc#S18336060            | darkturquoi | 336.399   | 25.178439 | 0.9485559 | 0.01389814 | 6.366   |
| gnl UG Ssc#S40527077            | blue        | 336.35238 | 199.91564 | 0.9945654 | 0.00048054 | 5.416   |
| gnl UG Ssc#S39778104            | darkred     | 336.27506 | 34.815522 | 0.9918815 | 0.00087704 | 23.47   |
| gnl UG Ssc#S6065016             | blue        | 335.94451 | 201.61728 | 0.9965731 | 0.0002407  | 4.456   |
| gnl UG Ssc#S23690342            | magenta     | 335.72761 | 29.839189 | 0.9114708 | 0.03119688 | 47.978  |
| gi 194037611 ref XM_001925424.1 | magenta     | 335.65631 | 29.352    | 0.9113953 | 0.03123639 | 41.358  |
| gnl UG Ssc#S40329149            | green       | 335.63692 | 76.713394 | 0.9517151 | 0.01264386 | 19.972  |
| gnl UG Ssc#S40144457            | lightyellow | 335.00828 | 34.325836 | 0.9977021 | 0.00013219 | 83.77   |
| gi 2286009 emb AJ000786.1       | blue        | 334.93942 | 199.43127 | 0.9936027 | 0.00061363 | 50.004  |
| gnl UG Ssc#S18547326            | white       | 334.87458 | 26.075591 | 0.9823485 | 0.00280771 | 20.548  |
| gi 115550230 dbj AK235709.1     | turquoise   | 334.7384  | 251.31592 | 0.670739  | 0.21524685 | 28.362  |
| gnl UG Ssc#S23762471            | darkred     | 334.72513 | 34.969252 | 0.9928999 | 0.00071741 | 17.476  |
| gnl UG Ssc#S16767178            | blue        | 334.62403 | 166.71891 | 0.9505021 | 0.01312087 | 8.248   |
| gnl UG Ssc#S39762052            | blue        | 334.55256 | 197.12425 | 0.9906021 | 0.00109211 | 4.958   |
| gi 178056609 ref NM_001123174.1 | green       | 334.2942  | 78.74204  | 0.9586348 | 0.01003628 | 26.558  |
| gnl UG Ssc#S40443043            | black       | 334.03961 | 40.86464  | 0.9278366 | 0.02301717 | 11.476  |
| gnl UG Ssc#S18556589            | white       | 333.91841 | 25.744738 | 0.9709082 | 0.00593043 | 144.144 |
| gi 115552841 dbj AK239435.1     | blue        | 333.89118 | 200.42204 | 0.9950743 | 0.00041468 | 4.494   |
| gnl UG Ssc#S23690807            | white       | 333.60366 | 27.276892 | 0.9874324 | 0.00168808 | 12.108  |
| gi 156151354 ref NM_001037146.2 | blue        | 333.35395 | 202.314   | 0.997413  | 0.0001579  | 11.95   |
| gnl UG Ssc#S40227949            | blue        | 333.34114 | 187.61308 | 0.9790346 | 0.00363259 | 11.502  |
| gnl UG Ssc#S40499571            | blue        | 333.28979 | 182.41655 | 0.9726172 | 0.005417   | 2.732   |
| gi 82617535 ref NM_001037322.1  | lightyellow | 333.10998 | 33.402435 | 0.9902824 | 0.00114825 | 54.896  |
| gnl UG Ssc#S39957439            | black       | 332.82752 | 51.127268 | 0.9725431 | 0.00543893 | 30.492  |
| gi 194035451 ref XM_001928072.1 | salmon      | 332.43682 | 44.435973 | 0.9848057 | 0.00224316 | 30.77   |
| gnl UG Ssc#S40111130            | blue        | 332.42935 | 203.17932 | 0.9987191 | 5.50E-05   | 3.77    |
| gnl UG Ssc#S23768102            | blue        | 332.35668 | 202.92878 | 0.9984083 | 7.62E-05   | 3.72    |
| gnl UG Ssc#S17518793            | turquoise   | 332.13446 | 256.64723 | 0.6717036 | 0.21433643 | 21.148  |
| gi 52351374 gb AY609804.1       | blue        | 331.65639 | 200.56604 | 0.9953109 | 0.00038518 | 4.796   |
| gnl UG Ssc#S18387207            | blue        | 330.74076 | 195.62366 | 0.9895117 | 0.00128738 | 14.478  |
| gnl UG Ssc#S18378854            | lightyellow | 330.63771 | 30.961356 | 0.9743634 | 0.00490849 | 27.306  |
| gi 194040979 ref XM_001928486.1 | lightyellow | 330.56341 | 31.152334 | 0.9749221 | 0.00474931 | 232.03  |
| gi 194033964 ref XM_001925719.1 | blue        | 330.48681 | 179.21146 | 0.9667957 | 0.00722687 | 1.432   |
| gnl UG Ssc#S23758340            | blue        | 330.36484 | 192.63314 | 0.9849239 | 0.00221709 | 5.25    |
| gnl UG Ssc#S17516095            | blue        | 330.36215 | 181.52645 | 0.9711239 | 0.00586478 | 13.166  |
| gnl UG Ssc#S40494040            | blue        | 330.33573 | 198.28826 | 0.9927697 | 0.00073722 | 4.418   |
| gi 52351125 gb AY609530.1       | green       | 330.13052 | 77.504682 | 0.9554525 | 0.01121103 | 68.966  |
| gi 115548591 dbj AK231575.1     | turquoise   | 330.08607 | 238.20449 | 0.6528719 | 0.23230053 | 18.768  |
| gnl UG Ssc#S17510233            | lightyellow | 329.9665  | 34.105438 | 0.9958292 | 0.00032314 | 78.914  |
| gnl UG Ssc#S18552822            | darkred     | 329.76885 | 30.88016  | 0.9661569 | 0.00743571 | 7.288   |
| gnl UG Ssc#S23759508            | turquoise   | 329.47615 | 238.83572 | 0.6562382 | 0.22906022 | 644.394 |
| gnl UG Ssc#S27603973            | lightyellow | 329.45145 | 30.159171 | 0.9660709 | 0.00746395 | 4.388   |
| gnl UG Ssc#S17499579            | turquoise   | 329.31328 | 265.53382 | 0.6817519 | 0.20491729 | 2.364   |
| gnl UG Ssc#S18553137            | black       | 329.29383 | 52.324139 | 0.9858962 | 0.0020064  | 108.018 |
| gnl UG Ssc#S18555551            | turquoise   | 329.26506 | 266.54662 | 0.6778703 | 0.20854183 | 46.6    |

|                                 |             |           |           |           |            |         |
|---------------------------------|-------------|-----------|-----------|-----------|------------|---------|
| gnl UG Ssc#S6076883             | blue        | 328.85702 | 136.54212 | 0.9016576 | 0.03646976 | 9.844   |
| gnl UG Ssc#S40522263            | salmon      | 328.83491 | 38.003496 | 0.9515443 | 0.0127107  | 76.646  |
| gnl UG Ssc#S22282893            | lightyellow | 328.81118 | 33.464099 | 0.9907218 | 0.00107133 | 41.916  |
| gnl UG Ssc#S18360885            | salmon      | 328.47113 | 40.854295 | 0.9642265 | 0.00807854 | 78.794  |
| gi 115555561 dbj AK237193.1     | blue        | 328.4439  | 202.95764 | 0.9987993 | 4.99E-05   | 1.92    |
| gnl UG Ssc#S40335524            | darkred     | 328.20891 | 33.776954 | 0.9856415 | 0.00206092 | 3.788   |
| gi 115552246 dbj AK230555.1     | turquoise   | 328.05029 | 291.34033 | 0.7214926 | 0.1688719  | 25.69   |
| gi 56792885 gb AY705918.1       | blue        | 328.0369  | 200.43107 | 0.9956267 | 0.00034695 | 2.144   |
| gnl UG Ssc#S40474761            | magenta     | 328.00588 | 33.096199 | 0.947462  | 0.01434142 | 3.782   |
| gnl UG Ssc#S40427363            | blue        | 327.76977 | 188.47411 | 0.980739  | 0.00319959 | 5.176   |
| gnl UG Ssc#S18382284            | magenta     | 327.50313 | 32.069556 | 0.95026   | 0.01321676 | 22.996  |
| gi 115551631 dbj AK239095.1     | blue        | 327.46668 | 169.12866 | 0.9551523 | 0.01132402 | 16.574  |
| gi 115554007 dbj AK233216.1     | turquoise   | 327.27814 | 285.10549 | 0.7062884 | 0.18242737 | 5.9     |
| gi 115549396 dbj AK235418.1     | black       | 327.22523 | 41.072998 | 0.9236626 | 0.02502668 | 23.176  |
| gnl UG Ssc#S19541572            | green       | 327.17785 | 75.359006 | 0.9492015 | 0.01363872 | 11.112  |
| gi 115545742 dbj AK234175.1     | blue        | 326.69147 | 198.72491 | 0.9939649 | 0.0005623  | 3.612   |
| gi 52351717 gb AY610147.1       | turquoise   | 326.5085  | 250.25169 | 0.673201  | 0.2129253  | 9.866   |
| gnl UG Ssc#S19541067            | magenta     | 326.38769 | 34.684102 | 0.9782687 | 0.00383301 | 29.118  |
| gnl UG Ssc#S40097075            | blue        | 326.21091 | 193.53427 | 0.987211  | 0.00173282 | 3.838   |
| gi 115547352 dbj AK234725.1     | blue        | 325.87541 | 180.58437 | 0.9700957 | 0.00617983 | 51      |
| gi 115553468 dbj AK236671.1     | blue        | 325.68329 | 179.41509 | 0.9688409 | 0.00657159 | 85.648  |
| gi 194043731 ref XM_001926974.1 | lightyellow | 325.2829  | 30.566262 | 0.9717069 | 0.00568858 | 22.458  |
| gi 115546137 dbj AK240375.1     | black       | 324.98525 | 51.572545 | 0.9790185 | 0.00363678 | 9.032   |
| gnl UG Ssc#S17512237            | blue        | 324.8194  | 200.59347 | 0.9959486 | 0.00030937 | 3.754   |
| gi 194044572 ref XM_001925488.1 | blue        | 324.58957 | 196.1388  | 0.99085   | 0.00104923 | 22.736  |
| gnl UG Ssc#S23701300            | blue        | 324.55615 | 162.21872 | 0.9425655 | 0.01638008 | 24.396  |
| gi 115554358 dbj AK233368.1     | turquoise   | 324.3132  | 249.44921 | 0.6621786 | 0.22337267 | 66.846  |
| gnl UG Ssc#S17505417            | white       | 324.26898 | 28.317728 | 0.9983427 | 8.10E-05   | 11.842  |
| gnl UG Ssc#S40072585            | blue        | 324.17916 | 195.90899 | 0.9898953 | 0.00121747 | 7.222   |
| gi 47523473 ref NM_214198.1     | blue        | 324.11302 | 171.60862 | 0.9584226 | 0.01011328 | 1.156   |
| gi 115551974 dbj AK239167.1     | blue        | 324.09655 | 174.02392 | 0.9610066 | 0.00918891 | 3.454   |
| gi 194035631 ref XM_001924325.1 | green       | 323.94794 | 69.806432 | 0.9343774 | 0.01997985 | 133.328 |
| gnl UG Ssc#S40358887            | blue        | 323.81668 | 201.81868 | 0.9976742 | 0.0001346  | 1.726   |
| gnl UG Ssc#S18356219            | darkred     | 323.76705 | 32.190614 | 0.9754507 | 0.00460031 | 53.108  |
| gi 194037139 ref XM_001925875.1 | darkred     | 323.68632 | 33.357324 | 0.9828178 | 0.00269667 | 52.936  |
| gi 115555021 dbj AK240220.1     | blue        | 323.67272 | 185.72135 | 0.9772274 | 0.00411116 | 35.408  |
| gnl UG Ssc#S18546038            | white       | 323.47528 | 26.233891 | 0.9837843 | 0.00247273 | 60.09   |
| gnl UG Ssc#S23767489            | white       | 323.447   | 27.967717 | 0.9991053 | 3.21E-05   | 4.794   |
| gi 52351129 gb AY609534.1       | blue        | 323.3105  | 184.8877  | 0.9761188 | 0.00441425 | 14.4    |
| gnl UG Ssc#S5997273             | blue        | 322.99532 | 199.29795 | 0.9943428 | 0.00051035 | 3.904   |
| gi 194038424 ref XM_001926793.1 | turquoise   | 322.32546 | 282.04713 | 0.6914668 | 0.19592455 | 28.57   |
| gi 16304807 emb AJ416019.1      | darkturquoi | 322.23077 | 29.072162 | 0.9846073 | 0.00228719 | 14.718  |
| gi 115546934 dbj AK240580.1     | blue        | 321.94533 | 177.42973 | 0.9661042 | 0.007453   | 6.408   |
| gi 194044550 ref XM_001927682.1 | salmon      | 321.7828  | 44.664294 | 0.9855027 | 0.00209082 | 104.03  |
| gnl UG Ssc#S18556194            | turquoise   | 321.58562 | 262.62088 | 0.673695  | 0.21246038 | 22.28   |
| gnl UG Ssc#S31107474            | green       | 321.58229 | 74.894312 | 0.946305  | 0.01481513 | 14.56   |
| gnl UG Ssc#S34516415            | darkred     | 321.56502 | 33.696907 | 0.9849407 | 0.00221339 | 2.11    |
| gi 115549275 dbj AK235196.1     | turquoise   | 321.42604 | 224.45274 | 0.6358267 | 0.24889666 | 100.08  |

|                                 |             |           |           |           |            |         |
|---------------------------------|-------------|-----------|-----------|-----------|------------|---------|
| gi 115550125 dbj AK235604.1     | darkred     | 321.38929 | 33.19001  | 0.9817246 | 0.00295759 | 20.59   |
| gnl UG Ssc#S31986007            | blue        | 321.29596 | 183.72657 | 0.9743308 | 0.00491784 | 6.382   |
| gnl UG Ssc#S40186233            | darkred     | 321.25006 | 32.368698 | 0.9767203 | 0.0042489  | 515.072 |
| gi 56711365 ref NM_001008688.1  | magenta     | 321.02613 | 29.290843 | 0.8933755 | 0.0411196  | 801.904 |
| gnl UG Ssc#S5991729             | turquoise   | 320.81054 | 216.27438 | 0.6350904 | 0.24962044 | 5.548   |
| gnl UG Ssc#S26732528            | blue        | 320.65359 | 170.32994 | 0.954493  | 0.0115735  | 6.594   |
| gnl UG Ssc#S40424734            | blue        | 320.17916 | 198.95146 | 0.9946619 | 0.00046781 | 12.716  |
| gi 115553601 dbj AK239788.1     | blue        | 319.85519 | 195.61266 | 0.9897577 | 0.00124241 | 5.924   |
| gi 113205873 ref NM_001044606.1 | darkred     | 319.69414 | 32.525825 | 0.9778187 | 0.00395242 | 118.01  |
| gi 186886351 gb EU617320.1      | lightyellow | 319.36755 | 29.238293 | 0.9575265 | 0.01044058 | 19.052  |
| gnl UG Ssc#S15981525            | blue        | 319.28996 | 162.55951 | 0.9451584 | 0.01528951 | 5.748   |
| gi 47523743 ref NM_214342.1     | blue        | 319.28276 | 135.26174 | 0.8991968 | 0.03783267 | 32.77   |
| gnl UG Ssc#S19542031            | white       | 319.07531 | 25.797965 | 0.9762338 | 0.00438247 | 290.744 |
| gnl UG Ssc#S40496270            | lightyellow | 318.65923 | 25.630063 | 0.9287343 | 0.0225921  | 39.698  |
| gi 115547214 dbj AK234587.1     | blue        | 318.44639 | 192.53846 | 0.9868094 | 0.00181498 | 1.81    |
| gi 113205929 ref NM_001044620.1 | blue        | 318.33388 | 195.62475 | 0.9907477 | 0.00106685 | 121.186 |
| gi 194038241 ref XM_001927985.1 | blue        | 318.31121 | 141.97238 | 0.91084   | 0.0315278  | 58.374  |
| gi 115553414 dbj AK236617.1     | darkred     | 318.24513 | 32.710125 | 0.9791717 | 0.00359711 | 35.208  |
| gi 194035643 ref XM_001927050.1 | salmon      | 318.21824 | 43.035195 | 0.9781767 | 0.00385734 | 152.628 |
| gi 115553473 dbj AK236676.1     | blue        | 318.07678 | 185.96979 | 0.9770449 | 0.00416055 | 15.36   |
| gnl UG Ssc#S18558403            | lightyellow | 317.6561  | 29.751568 | 0.9611915 | 0.00912389 | 12.75   |
| gi 52351961 gb AY610379.1       | white       | 317.36765 | 26.413305 | 0.9785712 | 0.00375344 | 54.334  |
| gi 52351299 gb AY609731.1       | blue        | 317.36674 | 195.61925 | 0.9902662 | 0.00115112 | 0.382   |
| gnl UG Ssc#S35166842            | blue        | 317.36674 | 195.61925 | 0.9902662 | 0.00115112 | 0.152   |
| gnl UG Ssc#S40035688            | blue        | 317.36674 | 195.61925 | 0.9902662 | 0.00115112 | 0.306   |
| gi 194043997 ref XM_001926349.1 | green       | 316.76899 | 71.268537 | 0.9372129 | 0.01870711 | 72.19   |
| gi 194044782 ref XM_001926654.1 | yellow      | 316.31695 | 50.919514 | 0.8945404 | 0.04045491 | 10.798  |
| gnl UG Ssc#S19548011            | darkturquoi | 316.13537 | 27.410353 | 0.9675728 | 0.00697547 | 11.056  |
| gi 115554459 dbj AK233469.1     | blue        | 316.12076 | 157.49425 | 0.937714  | 0.01848502 | 20.202  |
| gi 194035227 ref XM_001928768.1 | salmon      | 316.00483 | 42.484881 | 0.9752342 | 0.00466115 | 123.438 |
| gnl UG Ssc#S19549226            | blue        | 315.92726 | 193.31381 | 0.9869256 | 0.00179108 | 14.95   |
| gnl UG Ssc#S18355994            | brown       | 315.85032 | 80.118112 | 0.9317438 | 0.02118606 | 13.596  |
| gi 194038719 ref XM_001926310.1 | darkgrey    | 315.81589 | 15.322183 | 0.9482303 | 0.01402962 | 17.496  |
| gi 115551642 dbj AK239106.1     | darkturquoi | 315.7751  | 26.147127 | 0.9575626 | 0.01042734 | 70.624  |
| gnl UG Ssc#S23765932            | magenta     | 315.5941  | 33.565214 | 0.9873955 | 0.0016955  | 60.388  |
| gnl UG Ssc#S19537215            | lightyellow | 315.55599 | 30.880481 | 0.9702668 | 0.00612701 | 8.31    |
| gnl UG Ssc#S40290915            | lightyellow | 315.31185 | 33.300697 | 0.9911164 | 0.00100378 | 13.724  |
| gi 115546454 dbj AK230973.1     | turquoise   | 315.01829 | 264.57457 | 0.6934088 | 0.19414054 | 81.49   |
| gi 27357069 gb AY166682.1       | turquoise   | 314.87326 | 287.01996 | 0.7022879 | 0.18604336 | 6.14    |
| gi 52351160 gb AY609565.1       | blue        | 314.8444  | 163.2657  | 0.9451664 | 0.01528619 | 3.096   |
| gnl UG Ssc#S31133234            | salmon      | 314.19587 | 45.572691 | 0.9907311 | 0.00106973 | 9.824   |
| gi 115547065 dbj AK231120.1     | brown       | 314.12052 | 94.646403 | 0.9671712 | 0.00710505 | 13.93   |
| gnl UG Ssc#S18357732            | brown       | 313.95202 | 92.845017 | 0.9629221 | 0.00852268 | 21.926  |
| gnl UG Ssc#S18361423            | lightyellow | 313.91697 | 28.304914 | 0.9501399 | 0.01326445 | 91.978  |
| gi 52351120 gb AY609525.1       | turquoise   | 313.85053 | 218.87444 | 0.6305386 | 0.25410798 | 93.798  |
| gnl UG Ssc#S19542447            | salmon      | 313.5972  | 43.52735  | 0.9789347 | 0.00365853 | 22.01   |
| gnl UG Ssc#S16444449            | magenta     | 313.2348  | 33.240152 | 0.9768621 | 0.00421024 | 17.754  |
| gi 115549902 dbj AK232136.1     | brown       | 313.13469 | 96.204853 | 0.971384  | 0.00578594 | 48.75   |

|                                 |             |           |           |           |            |          |
|---------------------------------|-------------|-----------|-----------|-----------|------------|----------|
| gnl UG Ssc#S26734833            | blue        | 312.60874 | 171.81521 | 0.9586802 | 0.01001983 | 8.724    |
| gnl UG Ssc#S6085378             | yellow      | 312.5962  | 58.346567 | 0.9303225 | 0.02184647 | 11.222   |
| gnl UG Ssc#S18551834            | brown       | 312.49602 | 86.977876 | 0.9459377 | 0.01496655 | 32.902   |
| gnl UG Ssc#S40153514            | turquoise   | 312.27725 | 241.67415 | 0.6546998 | 0.23053949 | 73.922   |
| gi 194044123 ref XM_001926788.1 | lightyellow | 312.0828  | 28.406033 | 0.9519259 | 0.01256156 | 82.416   |
| gnl UG Ssc#S6030301             | darkturquoi | 311.98654 | 27.840538 | 0.9770345 | 0.00416337 | 0.314    |
| gi 54607194 ref NM_001006592.1  | brown       | 311.68312 | 95.949689 | 0.9717591 | 0.00567286 | 5876.728 |
| gnl UG Ssc#S26722558            | blue        | 311.65918 | 175.41826 | 0.9634223 | 0.00835145 | 35.902   |
| gnl UG Ssc#S31128151            | green       | 311.43176 | 56.174255 | 0.8876505 | 0.04443582 | 16.16    |
| gi 194036603 ref XM_001929372.1 | green       | 311.38231 | 70.574897 | 0.9361416 | 0.01918477 | 329.73   |
| gi 158631261 ref NM_001099936.1 | turquoise   | 311.37388 | 210.14724 | 0.621995  | 0.2625885  | 102.806  |
| gi 47523679 ref NM_214307.1     | turquoise   | 311.30632 | 254.49059 | 0.6800088 | 0.20654277 | 44.098   |
| gnl UG Ssc#S39777926            | yellow      | 311.2896  | 62.108953 | 0.9557349 | 0.01110507 | 325.156  |
| gnl UG Ssc#S40117649            | blue        | 311.16905 | 180.73546 | 0.9709742 | 0.00591031 | 12.36    |
| gnl UG Ssc#S18555750            | lightyellow | 311.09867 | 30.010307 | 0.963856  | 0.00820388 | 6.158    |
| gnl UG Ssc#S29979418            | magenta     | 311.09231 | 32.39811  | 0.9454225 | 0.01517984 | 0.828    |
| gi 194035607 ref XM_001928505.1 | turquoise   | 311.07646 | 209.01146 | 0.6246541 | 0.25994104 | 86.834   |
| gnl UG Ssc#S19542649            | blue        | 310.80793 | 165.10065 | 0.9513683 | 0.01277965 | 100.612  |
| gnl UG Ssc#S29465510            | lightyellow | 310.77948 | 28.883024 | 0.9553281 | 0.01125779 | 1260.64  |
| gnl UG Ssc#S18263529            | brown       | 310.63664 | 103.0007  | 0.986833  | 0.00181011 | 132.176  |
| gi 52352028 gb AY610444.1       | turquoise   | 310.62614 | 221.29547 | 0.6385601 | 0.24621435 | 7.566    |
| gnl UG Ssc#S6081340             | blue        | 310.45258 | 191.85722 | 0.9860256 | 0.00197889 | 3.89     |
| gnl UG Ssc#S17500067            | white       | 310.19502 | 26.425748 | 0.9915282 | 0.00093485 | 3.352    |
| gnl UG Ssc#S26395675            | brown       | 310.13352 | 93.14599  | 0.9636792 | 0.00826393 | 61.018   |
| gi 194042230 ref XM_001927832.1 | yellow      | 309.93299 | 47.073251 | 0.8629129 | 0.05966098 | 37.096   |
| gi 194043920 ref XM_001925866.1 | brown       | 309.48649 | 102.62762 | 0.9858983 | 0.00200595 | 19.466   |
| gi 194042787 ref XM_001924736.1 | white       | 309.34494 | 25.151187 | 0.9691339 | 0.00647941 | 94.36    |
| gnl UG Ssc#S22273263            | blue        | 309.30368 | 187.34213 | 0.980667  | 0.00321751 | 5.394    |
| gi 194035184 ref XM_001924626.1 | midnightblt | 309.29265 | 33.319705 | 0.9609485 | 0.00920939 | 78.394   |
| gnl UG Ssc#S19541658            | blue        | 308.94556 | 177.40156 | 0.9667234 | 0.00725042 | 22.226   |
| gi 115545844 dbj AK234277.1     | brown       | 308.83327 | 95.213596 | 0.9700337 | 0.00619899 | 68.872   |
| gnl UG Ssc#S34514135            | darkorange  | 308.3701  | 25.378456 | 0.9595093 | 0.009721   | 7.412    |
| gnl UG Ssc#S18553403            | brown       | 308.36914 | 102.78161 | 0.9868592 | 0.00180471 | 253.552  |
| gnl UG Ssc#S40401313            | brown       | 308.29448 | 88.295302 | 0.9521153 | 0.01248777 | 391.684  |
| gnl UG Ssc#S35167355            | darkred     | 308.28994 | 34.070436 | 0.9878242 | 0.00160985 | 4.306    |
| gnl UG Ssc#S35322980            | darkred     | 308.23828 | 32.091454 | 0.9755014 | 0.00458611 | 14.178   |
| gi 194036467 ref XM_001928805.1 | black       | 308.18986 | 48.055048 | 0.9626745 | 0.00860786 | 38.788   |
| gi 52351285 gb AY609717.1       | blue        | 308.17322 | 184.54481 | 0.9754999 | 0.00458653 | 1        |
| gi 178056668 ref NM_001123099.1 | brown       | 308.0895  | 94.786304 | 0.9671354 | 0.00711661 | 378.642  |
| gi 52351676 gb AY610106.1       | brown       | 308.08085 | 99.183893 | 0.9774568 | 0.00404933 | 18.534   |
| gi 194044568 ref XM_001928462.1 | darkturquoi | 307.96758 | 29.893915 | 0.9907751 | 0.00106212 | 61.536   |
| gnl UG Ssc#S19547872            | green       | 307.86977 | 54.417171 | 0.8809105 | 0.04844287 | 6.698    |
| gnl UG Ssc#S17527330            | magenta     | 307.73259 | 32.300262 | 0.9313523 | 0.02136731 | 30.17    |
| gi 47523581 ref NM_214257.1     | brown       | 307.67201 | 105.56002 | 0.9934621 | 0.00063397 | 18.068   |
| gnl UG Ssc#S18332789            | blue        | 307.65388 | 147.68717 | 0.9225598 | 0.02556663 | 13.554   |
| gnl UG Ssc#S19545397            | brown       | 307.61882 | 106.00713 | 0.9946028 | 0.0004756  | 85.74    |
| gnl UG Ssc#S40482470            | magenta     | 307.42936 | 31.882702 | 0.9718348 | 0.00565014 | 10.166   |
| gnl UG Ssc#S31122485            | brown       | 307.36506 | 94.106308 | 0.9682008 | 0.00677448 | 15.522   |

|                                 |             |           |           |           |            |         |
|---------------------------------|-------------|-----------|-----------|-----------|------------|---------|
| gi 194018685 ref NM_001129963.1 | brown       | 307.36222 | 104.41891 | 0.9911396 | 0.00099986 | 535.856 |
| gi 115549744 dbj AK232023.1     | brown       | 307.33951 | 100.5741  | 0.9811315 | 0.00310246 | 173.062 |
| gi 194033649 ref XM_001925294.1 | blue        | 307.27893 | 162.54133 | 0.9436303 | 0.01592926 | 17.394  |
| gi 52351406 gb AY609836.1       | violet      | 307.14302 | 14.660541 | 0.8663455 | 0.05746525 | 55.84   |
| gi 115552967 dbj AK239553.1     | magenta     | 307.08012 | 32.654581 | 0.9356645 | 0.01939875 | 34.482  |
| gi 47523845 ref NM_214396.1     | brown       | 307.05181 | 104.64653 | 0.9915342 | 0.00093387 | 202.534 |
| gnl UG Ssc#S23690002            | brown       | 307.04956 | 101.72295 | 0.9840389 | 0.00241482 | 13.712  |
| gnl UG Ssc#S25135664            | darkturquoi | 306.96896 | 28.606369 | 0.9790117 | 0.00363853 | 41.048  |
| gi 178056503 ref NM_001123076.1 | brown       | 306.8789  | 93.156466 | 0.9629594 | 0.00850988 | 201.504 |
| gnl UG Ssc#S18356838            | magenta     | 306.8441  | 33.208466 | 0.9803151 | 0.00330557 | 10.564  |
| gnl UG Ssc#S40012957            | turquoise   | 306.77275 | 254.00938 | 0.6706162 | 0.21536281 | 1.348   |
| gi 115551993 dbj AK239186.1     | green       | 306.7581  | 68.094567 | 0.9243481 | 0.02469295 | 112.6   |
| gnl UG Ssc#S26734006            | blue        | 306.62963 | 172.70382 | 0.9601245 | 0.00950121 | 4.824   |
| gi 47522685 ref NM_213898.1     | lightyellow | 306.61296 | 31.668131 | 0.9788806 | 0.00367262 | 32.222  |
| gi 194035136 ref XM_001924656.1 | darkgreen   | 306.43994 | 18.621348 | 0.88743   | 0.04456513 | 23.176  |
| gi 47523445 ref NM_214183.1     | yellow      | 306.34129 | 60.437036 | 0.9399583 | 0.01750101 | 55.874  |
| gnl UG Ssc#S40414470            | brown       | 306.16852 | 80.367357 | 0.9320734 | 0.02103385 | 50.678  |
| gi 201066357 ref NM_001134968.1 | brown       | 306.1313  | 102.04944 | 0.9856522 | 0.00205861 | 208.308 |
| gnl UG Ssc#S38481847            | blue        | 306.06774 | 186.21786 | 0.9790115 | 0.0036386  | 13.152  |
| gnl UG Ssc#S23700159            | greenyellow | 306.02878 | 40.92867  | 0.9700585 | 0.00619133 | 31.888  |
| gi 115546978 dbj AK231033.1     | darkred     | 305.85216 | 30.856167 | 0.967486  | 0.00700341 | 16.628  |
| gnl UG Ssc#S40174963            | brown       | 305.63879 | 107.06243 | 0.9969823 | 0.00019891 | 134.524 |
| gnl UG Ssc#S34531282            | green       | 305.52528 | 66.48399  | 0.9191304 | 0.02726922 | 66.508  |
| gnl UG Ssc#S40226524            | brown       | 305.38393 | 101.43963 | 0.9851847 | 0.0021599  | 20.17   |
| gnl UG Ssc#S6055465             | blue        | 305.37349 | 193.81357 | 0.988878  | 0.00140566 | 4.19    |
| gnl UG Ssc#S17512154            | greenyellow | 305.01639 | 40.085822 | 0.961985  | 0.00884657 | 32.618  |
| gi 115555675 dbj AK237308.1     | turquoise   | 304.81044 | 259.14175 | 0.6765508 | 0.20977794 | 28.796  |
| gi 194039226 ref XM_001928899.1 | brown       | 304.78109 | 96.731401 | 0.9723301 | 0.00550217 | 260.806 |
| gnl UG Ssc#S29460541            | brown       | 304.65127 | 79.319834 | 0.9286148 | 0.02264856 | 6.732   |
| gnl UG Ssc#S18553035            | brown       | 304.59279 | 101.64891 | 0.984573  | 0.00229482 | 98.324  |
| gnl UG Ssc#S26727199            | lightyellow | 304.53881 | 28.95932  | 0.9548294 | 0.01144597 | 11.168  |
| gi 115553121 dbj AK239707.1     | lightyellow | 304.49818 | 28.564856 | 0.9514063 | 0.01276476 | 60.23   |
| gnl UG Ssc#S34527927            | magenta     | 304.387   | 32.744326 | 0.9418854 | 0.01667016 | 50.096  |
| gi 157427686 ref NM_214374.2    | brown       | 304.36181 | 97.689052 | 0.9769144 | 0.00419601 | 604.248 |
| gi 194034424 ref XM_001926336.1 | lightyellow | 304.34178 | 27.660944 | 0.9440718 | 0.01574357 | 19.786  |
| gi 115548383 dbj AK235000.1     | turquoise   | 304.2879  | 218.0053  | 0.6375396 | 0.24721485 | 59.764  |
| gnl UG Ssc#S32419644            | brown       | 303.96451 | 107.27614 | 0.9977002 | 0.00013235 | 120.84  |
| gi 115545669 dbj AK230784.1     | brown       | 303.93625 | 99.606216 | 0.9803629 | 0.00329356 | 78.984  |
| gi 194034436 ref XM_001927720.1 | darkorange  | 303.6347  | 28.089263 | 0.980594  | 0.00323572 | 76.488  |
| gi 115549680 dbj AK231959.1     | white       | 303.3682  | 28.214665 | 0.9934034 | 0.00064251 | 202.738 |
| gi 115550848 dbj AK235923.1     | brown       | 303.33755 | 96.035468 | 0.9704289 | 0.00607713 | 107.562 |
| gi 194018701 ref NM_001129947.1 | brown       | 303.03826 | 108.01503 | 0.9995491 | 1.15E-05   | 1476.36 |
| gi 115549608 dbj AK238416.1     | brown       | 302.83197 | 104.4682  | 0.9912508 | 0.0009811  | 80.514  |
| gi 55741810 ref NM_001001863.1  | brown       | 302.71506 | 101.06436 | 0.9847452 | 0.00225657 | 1158.53 |
| gi 194041001 ref XM_001924658.1 | blue        | 302.6184  | 189.48374 | 0.9835409 | 0.00252854 | 4.006   |
| gnl UG Ssc#S39979775            | blue        | 302.45712 | 185.0672  | 0.9778558 | 0.00394254 | 5.41    |
|                                 | greenyellow |           |           |           |            |         |

|                                   |             |           |           |           |            |         |
|-----------------------------------|-------------|-----------|-----------|-----------|------------|---------|
| gi 194271212 gb EU714326.1        | greenyellow | 301.84959 | 36.524442 | 0.9422239 | 0.01652556 | 47.584  |
| gnl UG Ssc#S40099717              | darkturquoi | 301.79447 | 28.390787 | 0.9819806 | 0.0028958  | 5.672   |
| gnl UG Ssc#S18383473              | greenyellow | 301.74423 | 41.793262 | 0.9735615 | 0.00513996 | 49.072  |
| gnl UG Ssc#S31114548              | brown       | 301.66327 | 96.204951 | 0.9710735 | 0.00588008 | 8.402   |
| gi 118403765 ref NM_001078687.1   | brown       | 301.44609 | 94.69122  | 0.970128  | 0.00616985 | 107.734 |
| gi 47523641 ref NM_214289.1       | blue        | 301.35831 | 186.49424 | 0.9795169 | 0.00350824 | 21.048  |
| gnl UG Ssc#S19540021              | black       | 301.29272 | 29.289435 | 0.8533683 | 0.06589998 | 7.5     |
| gnl UG Ssc#S17510398              | brown       | 301.2144  | 86.673404 | 0.9437293 | 0.01588756 | 556.998 |
| gnl UG Ssc#S40527867              | brown       | 300.89018 | 85.471268 | 0.9403672 | 0.01732362 | 32.928  |
| gnl UG Ssc#S19550257              | midnightblt | 300.68746 | 35.415118 | 0.9760752 | 0.00442632 | 6.276   |
| gnl UG Ssc#S23756816              | black       | 300.68708 | 49.327142 | 0.9680777 | 0.00681373 | 15.292  |
| gnl UG Ssc#S29982561              | salmon      | 300.59891 | 44.802244 | 0.9866739 | 0.00184296 | 12.802  |
| gnl UG Ssc#S39988753              | blue        | 300.56771 | 175.81907 | 0.9658007 | 0.00755298 | 0.612   |
| gnl UG Ssc#S17509886              | magenta     | 300.44972 | 31.848467 | 0.9351589 | 0.01962635 | 398.152 |
| gi 115551270 dbj AK232704.1       | brown       | 300.2558  | 87.278038 | 0.9462902 | 0.01482124 | 124.826 |
| gnl UG Ssc#S23770961              | brown       | 300.23777 | 81.686571 | 0.9351818 | 0.01961602 | 51.16   |
| gi 47523567 ref NM_214244.1       | brown       | 300.08116 | 86.667074 | 0.9439025 | 0.0158147  | 27.844  |
| gnl UG Ssc#S17524983              | blue        | 300.02448 | 133.15797 | 0.8978679 | 0.0385753  | 20.698  |
| gi 47522691 ref NM_213897.1       | brown       | 299.71064 | 95.305313 | 0.9676922 | 0.00693712 | 56.34   |
| gnl UG Ssc#S39839770              | white       | 299.46958 | 26.486026 | 0.9762195 | 0.00438643 | 7.41    |
| gnl UG Ssc#S18558146              | turquoise   | 299.31969 | 225.11508 | 0.6396702 | 0.24512733 | 9.42    |
| gnl UG Ssc#S6058262               | white       | 299.084   | 25.552064 | 0.9654662 | 0.00766368 | 5.812   |
| gnl UG Ssc#S6075829               | yellow      | 299.02416 | 55.582956 | 0.934709  | 0.01982961 | 76.24   |
| gnl UG Ssc#S39992562              | blue        | 298.97599 | 164.72895 | 0.9505883 | 0.01308679 | 1.946   |
| gnl UG Ssc#S35329402              | white       | 298.96285 | 19.896015 | 0.1901631 | 0.75934418 | 131.592 |
| gnl UG Ssc#S31114666              | darkturquoi | 298.86459 | 25.834594 | 0.9593569 | 0.00977573 | 33.172  |
| gnl UG Ssc#S40397505              | black       | 298.83324 | 36.712002 | 0.9016876 | 0.03645323 | 5.742   |
| gnl UG Ssc#S39998964              | blue        | 298.69015 | 191.07408 | 0.9859235 | 0.00200059 | 3.92    |
| gnl UG Ssc#S40212608              | brown       | 298.3455  | 97.724935 | 0.9741063 | 0.00498231 | 12.312  |
| gi 10304379 gb AF288822.1 AF28882 | blue        | 298.2811  | 170.26651 | 0.9582259 | 0.01018483 | 85.772  |
| gnl UG Ssc#S40097726              | blue        | 298.20977 | 186.63719 | 0.9801861 | 0.00333805 | 1.216   |
| gi 115549689 dbj AK231968.1       | white       | 298.18333 | 18.052569 | 0.2918713 | 0.63372388 | 29.914  |
| gi 115550607 dbj AK232437.1       | darkorange  | 298.138   | 28.761487 | 0.9852798 | 0.00213917 | 64.382  |
| gnl UG Ssc#S29978907              | darkred     | 298.05558 | 31.375649 | 0.969818  | 0.00626585 | 10.674  |
| gi 115552393 dbj AK236398.1       | blue        | 298.02826 | 186.9441  | 0.9806223 | 0.00322866 | 3.968   |
| gi 109639160 ref NM_001025222.2   | brown       | 297.99736 | 97.816419 | 0.9775712 | 0.00401861 | 253.49  |
| gnl UG Ssc#S23763002              | yellow      | 297.91148 | 63.786412 | 0.9569239 | 0.01066258 | 10.674  |
| gnl UG Ssc#S40143363              | turquoise   | 297.83642 | 174.10048 | 0.5855299 | 0.29959484 | 39.99   |
| gnl UG Ssc#S40529248              | brown       | 297.78666 | 94.184868 | 0.9649539 | 0.00783426 | 464.38  |
| gnl UG Ssc#S23756098              | purple      | 297.72008 | 48.884974 | 0.9519573 | 0.01254932 | 215.67  |
| gi 194036309 ref XM_001927637.1   | darkorange  | 297.62965 | 29.598201 | 0.9914341 | 0.00095047 | 139.95  |
| gnl UG Ssc#S40146561              | purple      | 297.59137 | 51.386125 | 0.9623951 | 0.00870435 | 67.434  |
| gnl UG Ssc#S29459150              | white       | 297.54082 | 28.151245 | 0.996675  | 0.00023004 | 258.17  |
| gnl UG Ssc#S6008489               | brown       | 297.50048 | 103.40982 | 0.9892898 | 0.0013284  | 7.688   |
| gnl UG Ssc#S17511815              | blue        | 297.43306 | 190.753   | 0.9854182 | 0.0021091  | 1.904   |
| gi 45268992 gb AY550051.1         | white       | 297.25784 | 24.658895 | 0.9688473 | 0.00656957 | 38.49   |
| gi 52351736 gb AY610166.1         | brown       | 297.13704 | 86.891416 | 0.9478005 | 0.01420377 | 136.72  |
| gi 47523789 ref NM_214366.1       | turquoise   | 296.95932 | 261.31079 | 0.6879421 | 0.19917411 | 118.878 |

|                                 |             |           |           |           |            |          |
|---------------------------------|-------------|-----------|-----------|-----------|------------|----------|
| gi 194036972 ref XM_001927228.1 | grey60      | 296.88189 | 15.809824 | 0.802947  | 0.10184413 | 240.14   |
| gi 194042611 ref XM_001927098.1 | salmon      | 296.78511 | 46.458815 | 0.9938149 | 0.00058338 | 17.662   |
| gnl UG Ssc#S40101480            | blue        | 296.70106 | 188.00418 | 0.9822236 | 0.00283751 | 2.056    |
| gi 47523721 ref NM_214331.1     | yellow      | 296.69553 | 65.80664  | 0.9713065 | 0.00580939 | 134.522  |
| gnl UG Ssc#S19541250            | salmon      | 296.62675 | 44.914598 | 0.9866687 | 0.00184405 | 2.314    |
| gnl UG Ssc#S23691718            | magenta     | 296.61202 | 31.968289 | 0.9518529 | 0.01259004 | 117.428  |
| gnl UG Ssc#S23698752            | midnightblt | 296.56618 | 32.895431 | 0.960273  | 0.00944838 | 82.914   |
| gnl UG Ssc#S34527542            | yellow      | 296.41014 | 62.976617 | 0.9610489 | 0.00917404 | 17.392   |
| gi 112181313 ref NM_214438.2    | white       | 296.35694 | 20.091333 | 0.194513  | 0.75390908 | 554.688  |
| gnl UG Ssc#S34529627            | black       | 296.25666 | 52.010725 | 0.9805319 | 0.00325124 | 1.722    |
| gnl UG Ssc#S23757521            | violet      | 296.19823 | 15.6526   | 0.8799413 | 0.04902803 | 3.258    |
| gnl UG Ssc#S40426021            | darkred     | 296.15034 | 29.793441 | 0.9594844 | 0.00972994 | 16.598   |
| gnl UG Ssc#S40377740            | brown       | 296.07824 | 86.119427 | 0.9447925 | 0.01544191 | 267.046  |
| gnl UG Ssc#S18387146            | salmon      | 295.97001 | 46.334148 | 0.9940833 | 0.00054584 | 12.33    |
| gnl UG Ssc#S34512754            | turquoise   | 295.9535  | 247.41979 | 0.6958774 | 0.19187958 | 12.358   |
| gi 115554089 dbj AK233298.1     | darkturquoi | 295.93554 | 25.556511 | 0.9564096 | 0.01085325 | 7.61     |
| gi 150246527 ref NM_001044575.2 | greenyellow | 295.85308 | 37.746217 | 0.950339  | 0.01318547 | 74.688   |
| gi 194040411 ref XM_001929558.1 | brown       | 295.84915 | 83.416495 | 0.9350788 | 0.01966251 | 185.484  |
| gnl UG Ssc#S39932918            | white       | 295.84477 | 18.969618 | 0.1221204 | 0.84489885 | 9.882    |
| gi 89886172 ref NM_001039748.1  | brown       | 295.66045 | 90.108278 | 0.9564468 | 0.01083942 | 116.398  |
| gnl UG Ssc#S23692648            | blue        | 295.53387 | 186.35291 | 0.9794779 | 0.00351823 | 8.178    |
| gnl UG Ssc#S23755550            | darkorange  | 295.37638 | 29.148558 | 0.9881798 | 0.00153992 | 62.286   |
| gnl UG Ssc#S40045135            | white       | 295.36835 | 19.624624 | 0.1645738 | 0.79140795 | 61.486   |
| gnl UG Ssc#S40053273            | white       | 295.19597 | 27.933521 | 0.9941561 | 0.0005358  | 243.498  |
| gi 47523805 ref NM_214375.1     | yellow      | 294.83918 | 57.613045 | 0.9223073 | 0.02569079 | 585.196  |
| gnl UG Ssc#S25135824            | brown       | 294.82649 | 98.189527 | 0.9764551 | 0.00432155 | 24.832   |
| gnl UG Ssc#S6085740             | brown       | 294.82039 | 95.905304 | 0.9730412 | 0.00529201 | 19.592   |
| gi 115549338 dbj AK232116.1     | darkorange  | 294.73518 | 28.968098 | 0.9867551 | 0.00182618 | 67.136   |
| gnl UG Ssc#S39982552            | greenyellow | 294.55722 | 42.677465 | 0.9782406 | 0.00384045 | 221.694  |
| gnl UG Ssc#S40396824            | greenyellow | 294.46042 | 43.797396 | 0.9868393 | 0.00180881 | 41.73    |
| gi 115552527 dbj AK236532.1     | purple      | 294.35405 | 54.49273  | 0.9748572 | 0.00476772 | 81.296   |
| gi 80971505 ref NM_001037147.1  | turquoise   | 294.3509  | 235.30806 | 0.6537674 | 0.23143733 | 3.316    |
| gnl UG Ssc#S23697317            | green       | 294.3295  | 66.797428 | 0.9210464 | 0.02631362 | 35.276   |
| gnl UG Ssc#S40094025            | blue        | 294.32131 | 183.83807 | 0.9767971 | 0.00422795 | 5.776    |
| gnl UG Ssc#S23762266            | black       | 294.27724 | 33.220156 | 0.8779087 | 0.05026242 | 37.548   |
| gnl UG Ssc#S18383647            | lightyellow | 294.27538 | 31.568839 | 0.9798513 | 0.00342286 | 6.724    |
| gi 52351620 gb AY610050.1       | blue        | 294.03783 | 173.40571 | 0.9636995 | 0.00825702 | 43.464   |
| gi 194036687 ref XM_001926116.1 | white       | 293.84054 | 19.822801 | 0.2006707 | 0.74622348 | 40.982   |
| gnl UG Ssc#S19549165            | greenyellow | 293.78031 | 37.047645 | 0.9409949 | 0.01705245 | 49.13    |
| gi 194034216 ref XM_001928595.1 | brown       | 293.66221 | 104.7812  | 0.9924561 | 0.00078566 | 119.698  |
| gi 194018721 ref NM_001129949.1 | brown       | 293.63692 | 100.91738 | 0.9837836 | 0.0024729  | 2856.814 |
| gi 47523491 ref NM_214204.1     | midnightblt | 293.58003 | 30.098361 | 0.9363064 | 0.01911102 | 676.036  |
| gnl UG Ssc#S40482312            | blue        | 293.55432 | 166.54066 | 0.954567  | 0.0115454  | 50.898   |
| gnl UG Ssc#S35331200            | brown       | 293.51521 | 106.9734  | 0.9974567 | 0.00015391 | 54.426   |
| gi 114703735 ref NM_001048187.1 | brown       | 293.4182  | 81.170025 | 0.92839   | 0.02275483 | 20.308   |
| gnl UG Ssc#S22277516            | lightyellow | 292.96934 | 26.434527 | 0.9397088 | 0.01760951 | 46.472   |

midnightblt

|                                 |             |           |           |           |            |          |
|---------------------------------|-------------|-----------|-----------|-----------|------------|----------|
| gi 115554973 dbj AK240172.1     | yellow      | 292.70224 | 46.908372 | 0.8573136 | 0.06329759 | 28.844   |
| gi 115552602 dbj AK232807.1     | brown       | 292.55585 | 78.214427 | 0.9192954 | 0.02718646 | 81.268   |
| gi 48374062 ref NM_001001535.1  | darkgreen   | 292.36207 | 20.973404 | 0.9082401 | 0.03290361 | 2885.426 |
| gnl UG Ssc#S18549214            | darkturquoi | 292.28856 | 29.70696  | 0.9886972 | 0.00144004 | 15.71    |
| gnl UG Ssc#S38481364            | midnightblu | 292.25848 | 35.812242 | 0.9779798 | 0.00390956 | 19.174   |
| gnl UG Ssc#S40232606            | brown       | 292.09719 | 98.93083  | 0.9799695 | 0.00339283 | 6.968    |
| gi 194037172 ref XM_001928663.1 | brown       | 291.93741 | 85.677149 | 0.9433185 | 0.01606087 | 72.914   |
| gi 115550354 dbj AK238619.1     | brown       | 291.8038  | 99.77102  | 0.981417  | 0.00303245 | 85.364   |
| gi 147899058 ref NM_001097509.1 | white       | 291.29736 | 20.06898  | 0.1946324 | 0.75375995 | 30.696   |
| gi 139530445 gb EF486522.1      | brown       | 291.08662 | 99.539858 | 0.9801159 | 0.00335578 | 452.242  |
| gi 115552944 dbj AK239538.1     | brown       | 291.00222 | 104.2658  | 0.9910112 | 0.00102165 | 42.444   |
| gnl UG Ssc#S40500401            | darkgreen   | 290.95895 | 18.989369 | 0.830909  | 0.08131686 | 34.694   |
| gi 149364039 gb EF468461.1      | white       | 290.89797 | 18.967298 | 0.1091966 | 0.86124332 | 43.588   |
| gi 157427731 ref NM_001105304.1 | darkgrey    | 290.8001  | 16.028141 | 0.9688903 | 0.00655601 | 51.208   |
| gi 194034834 ref XM_001925793.1 | brown       | 290.63422 | 102.52792 | 0.9880113 | 0.00157294 | 81.732   |
| gi 178056859 ref NM_001123091.1 | greenyellow | 290.61839 | 41.410237 | 0.9729773 | 0.00531079 | 65.478   |
| gi 52351702 gb AY610132.1       | grey60      | 290.57154 | 12.129514 | 0.5202516 | 0.36882511 | 65.828   |
| gnl UG Ssc#S40045387            | greenyellow | 290.16898 | 39.611499 | 0.9663885 | 0.00735978 | 23.912   |
| gnl UG Ssc#S6014656             | yellow      | 289.9825  | 67.901194 | 0.9771841 | 0.00412287 | 21.684   |
| gnl UG Ssc#S18379594            | white       | 289.53492 | 25.364417 | 0.9778105 | 0.00395463 | 23.822   |
| gnl UG Ssc#S31120438            | turquoise   | 289.37792 | 245.74184 | 0.678806  | 0.20766642 | 26.262   |
| gi 113205497 ref NM_001044527.1 | purple      | 289.12431 | 54.153928 | 0.9738118 | 0.00506734 | 425.972  |
| gnl UG Ssc#S40315766            | darkturquoi | 289.06186 | 29.152419 | 0.9872007 | 0.00173492 | 25.588   |
| gi 115552519 dbj AK236524.1     | greenyellow | 288.89952 | 43.588284 | 0.9844721 | 0.00231733 | 66.258   |
| gnl UG Ssc#S40077180            | darkturquoi | 288.88828 | 28.067917 | 0.9795876 | 0.00349013 | 4.854    |
| gi 194042969 ref XM_001929585.1 | yellowgreer | 288.6675  | 16.024332 | 0.9748449 | 0.00477119 | 86.81    |
| gnl UG Ssc#S23762736            | brown       | 288.64218 | 93.941871 | 0.968379  | 0.00671779 | 9.36     |
| gi 115549349 dbj AK232127.1     | greenyellow | 288.55313 | 42.412895 | 0.9774505 | 0.00405101 | 31.774   |
| gnl UG Ssc#S31133918            | purple      | 288.36206 | 56.242789 | 0.9816878 | 0.00296653 | 8.342    |
| gi 52351582 gb AY610012.1       | magenta     | 288.29141 | 32.936188 | 0.9729562 | 0.005317   | 19.596   |
| gi 115547955 dbj AK234932.1     | brown       | 288.25703 | 95.173069 | 0.9713128 | 0.0058075  | 21.492   |
| gi 147902484 ref NM_001097419.1 | turquoise   | 288.04805 | 243.48534 | 0.6702494 | 0.21570928 | 51.11    |
| gnl UG Ssc#S23690458            | grey60      | 287.97547 | 16.056354 | 0.7373456 | 0.15506487 | 15.74    |
| gnl UG Ssc#S26716026            | black       | 287.86203 | 44.730526 | 0.9480119 | 0.01411804 | 92.704   |
| gnl UG Ssc#S38479786            | turquoise   | 287.55698 | 227.58848 | 0.6406129 | 0.24420516 | 94.686   |
| gi 194036805 ref XM_001928924.1 | darkgreen   | 287.51482 | 21.878818 | 0.9037484 | 0.03532435 | 43.702   |
| gnl UG Ssc#S18557598            | darkgreen   | 287.48453 | 21.430239 | 0.8974511 | 0.03880918 | 51.518   |
| gi 115552724 dbj AK232929.1     | violet      | 287.42378 | 16.19736  | 0.9257626 | 0.0240089  | 54.712   |
| gnl UG Ssc#S17504469            | darkorange  | 287.15032 | 29.760218 | 0.9925719 | 0.00076766 | 41.096   |
| gnl UG Ssc#S26714423            | turquoise   | 287.14924 | 257.1805  | 0.6745057 | 0.21169795 | 78.254   |
| gnl UG Ssc#S23765987            | greenyellow | 286.97047 | 43.133666 | 0.9817668 | 0.00294739 | 71.432   |
| gi 190360656 ref NM_001128470.1 | brown       | 286.94262 | 73.304196 | 0.9056767 | 0.03427837 | 91.048   |
| gnl UG Ssc#S18284050            | yellow      | 286.89956 | 36.639361 | 0.7785758 | 0.12083521 | 17.108   |
| gnl UG Ssc#S40148092            | darkorange  | 286.76034 | 29.21246  | 0.9890708 | 0.00136931 | 37.702   |
| gnl UG Ssc#S18267174            | darkgrey    | 286.45943 | 16.600979 | 0.97169   | 0.00569366 | 64.186   |
| gnl UG Ssc#S17510469            | lightyellow | 286.3926  | 27.650938 | 0.9463834 | 0.01478288 | 12.82    |
| gnl UG Ssc#S39839769            | yellow      | 286.38605 | 59.152575 | 0.952692  | 0.01226392 | 13.046   |
| gi 115551399 dbj AK236077.1     | darkturquoi | 286.27928 | 29.159191 | 0.9866311 | 0.00185185 | 33.152   |



|                                   |             |           |           |           |            |         |
|-----------------------------------|-------------|-----------|-----------|-----------|------------|---------|
| gi 115551308 dbj AK235986.1       | greenyellow | 286.25585 | 43.122248 | 0.9809262 | 0.00315315 | 21.586  |
| gnl UG Ssc#S23757695              | midnightblu | 286.16399 | 36.219642 | 0.980857  | 0.00317027 | 59.428  |
| gi 194037039 ref XM_001926976.1   | white       | 286.15316 | 20.591963 | 0.0825876 | 0.8949659  | 41.456  |
| gi 194036118 ref XM_001927231.1   | pink        | 286.13134 | 19.543693 | -0.819283 | 0.08967952 | 18.536  |
| gi 115548698 dbj AK231683.1       | white       | 286.08794 | 26.730945 | 0.98366   | 0.00250119 | 55.818  |
| gnl UG Ssc#S17516920              | brown       | 286.04688 | 99.673347 | 0.9814745 | 0.00301842 | 13.454  |
| gi 115548072 dbj AK238056.1       | purple      | 286.03888 | 56.28203  | 0.9820232 | 0.00288554 | 32.27   |
| gi 194042350 ref XM_001924660.1   | turquoise   | 286.01048 | 206.43689 | 0.6206905 | 0.26388996 | 35.52   |
| gi 194036621 ref XM_001927321.1   | yellow      | 285.99186 | 54.061605 | 0.8996869 | 0.03755996 | 90.392  |
| gnl UG Ssc#S18558242              | purple      | 285.9067  | 55.618544 | 0.9793474 | 0.00355178 | 205.736 |
| gnl UG Ssc#S22278253              | yellowgreer | 285.76421 | 16.338015 | 0.9790318 | 0.00363333 | 31.874  |
| gnl UG Ssc#S6666060               | magenta     | 285.72869 | 14.25601  | -0.228166 | 0.7120309  | 3.466   |
| gi 194044943 ref XM_001926010.1   | darkgreen   | 285.65619 | 21.696922 | 0.8835994 | 0.04683116 | 91.834  |
| gnl UG Ssc#S29966064              | darkred     | 285.48311 | 31.695193 | 0.9730263 | 0.00529638 | 20.364  |
| gi 71834281 ref NM_214197.2       | yellow      | 285.4655  | 57.93549  | 0.9236201 | 0.02504743 | 154.696 |
| gnl UG Ssc#S31101544              | purple      | 285.45163 | 56.051704 | 0.9811162 | 0.00310624 | 55.494  |
| gnl UG Ssc#S35323577              | blue        | 285.3207  | 172.97088 | 0.9621868 | 0.00877648 | 8.93    |
| gi 194041762 ref XM_001927529.1   | turquoise   | 285.23109 | 237.14832 | 0.6729051 | 0.21320396 | 56.294  |
| gi 47522785 ref NM_213980.1       | magenta     | 285.1704  | 31.00602  | 0.9167659 | 0.02846346 | 77.412  |
| gnl UG Ssc#S40482232              | salmon      | 285.12682 | 46.44198  | 0.9939636 | 0.00056247 | 73.132  |
| gnl UG Ssc#S17516311              | darkorange  | 285.03763 | 29.686626 | 0.9919354 | 0.00086832 | 132.112 |
| gnl UG Ssc#S23775247              | darkorange  | 284.98927 | 28.469977 | 0.9839083 | 0.00244448 | 4889.31 |
| gi 2988384 gb AF033855.1 AF033855 | yellow      | 284.9026  | 55.350494 | 0.8993555 | 0.03774433 | 20.648  |
| gi 115551350 dbj AK236028.1       | darkgrey    | 284.85723 | 14.850823 | 0.9411224 | 0.01699755 | 18.354  |
| gnl UG Ssc#S6072986               | white       | 284.77746 | 19.913508 | 0.1930477 | 0.75573944 | 25.71   |
| gnl UG Ssc#S39858087              | greenyellow | 284.75779 | 44.408831 | 0.9917981 | 0.00089057 | 61.986  |
| gi 55741485 ref NM_213855.1       | purple      | 284.48149 | 55.829374 | 0.9802832 | 0.0033136  | 469.446 |
| gi 11555012 dbj AK240211.1        | turquoise   | 284.31836 | 223.19972 | 0.6619745 | 0.22356743 | 186.958 |
| gnl UG Ssc#S17503882              | grey60      | 284.28458 | 14.099355 | 0.7482334 | 0.14578366 | 31.1    |
| gnl UG Ssc#S22279857              | blue        | 284.15577 | 157.19571 | 0.9370524 | 0.01877843 | 0.308   |
| gnl UG Ssc#S18558128              | grey60      | 283.98694 | 16.021883 | 0.9366109 | 0.01897503 | 8.784   |
| gi 194036406 ref XM_001927918.1   | darkorange  | 283.69289 | 30.748971 | 0.9994981 | 1.35E-05   | 145.16  |
| gnl UG Ssc#S35325791              | brown       | 283.66873 | 90.762509 | 0.9588895 | 0.00994414 | 25.82   |
| gnl UG Ssc#S34528527              | brown       | 283.60352 | 99.471985 | 0.9813043 | 0.00306002 | 66.832  |
| gi 115553524 dbj AK236727.1       | brown       | 283.46924 | 99.46165  | 0.9803356 | 0.00330044 | 42.8    |
| gnl UG Ssc#S18282381              | darkgreen   | 283.46564 | 21.655228 | 0.8865272 | 0.04509598 | 55.08   |
| gi 194043243 ref XM_001924074.1   | blue        | 283.41615 | 162.59563 | 0.9464934 | 0.01473764 | 52.614  |
| gnl UG Ssc#S16763939              | black       | 283.4159  | 49.317163 | 0.9680389 | 0.00682611 | 29.286  |
| gnl UG Ssc#S19542276              | brown       | 283.21596 | 80.343507 | 0.9283976 | 0.02275121 | 13.868  |
| gi 1841944 emb X95846.1           | white       | 283.11927 | 17.813357 | 0.1965429 | 0.75137436 | 16.594  |
| gnl UG Ssc#S23757556              | turquoise   | 282.97484 | 215.62257 | 0.6364815 | 0.24825337 | 11.588  |
| gi 47523403 ref NM_214157.1       | salmon      | 282.86312 | 46.120025 | 0.9926726 | 0.00075211 | 23.444  |
| gi 52351873 gb AY610291.1         | darkorange  | 282.78057 | 29.786377 | 0.992829  | 0.00072818 | 123.95  |
| gnl UG Ssc#S19540428              | brown       | 282.77784 | 87.733232 | 0.9506959 | 0.01304428 | 8.722   |
| gnl UG Ssc#S23758125              | turquoise   | 282.72483 | 189.70224 | 0.6068105 | 0.27784215 | 244.998 |
| gi 194041867 ref XM_001925382.1   | darkred     | 282.57845 | 27.171055 | 0.9410358 | 0.01703481 | 14.39   |
| gi 115548002 dbj AK237986.1       | yellow      | 282.49849 | 66.355504 | 0.9666657 | 0.00726922 | 227.186 |
| gi 47522939 ref NM_214062.1       | yellow      | 282.27908 | 66.872393 | 0.9652477 | 0.00773629 | 118.008 |

|                                 |             |           |           |           |            |         |
|---------------------------------|-------------|-----------|-----------|-----------|------------|---------|
| gi 115554857 dbj AK233669.1     | greenyellow | 282.18839 | 41.55539  | 0.9746513 | 0.00482624 | 111.094 |
| gi 115555162 dbj AK233777.1     | blue        | 281.96414 | 142.50256 | 0.9130711 | 0.0303623  | 66.58   |
| gnl UG Ssc#S29989732            | white       | 281.95949 | 20.517974 | 0.0869017 | 0.8894928  | 90.918  |
| gnl UG Ssc#S19541992            | blue        | 281.95062 | 181.176   | 0.9736542 | 0.00511302 | 21.496  |
| gi 147905343 ref NM_001097438.1 | darkgreen   | 281.91354 | 22.172674 | 0.8960653 | 0.03959001 | 21.484  |
| gnl UG Ssc#S23757528            | blue        | 281.78793 | 160.19861 | 0.9443969 | 0.01560727 | 13.49   |
| gnl UG Ssc#S18555004            | violet      | 281.70437 | 15.897344 | 0.913844  | 0.02996183 | 65.97   |
| gi 115549949 dbj AK232184.1     | violet      | 281.59166 | 16.798678 | 0.9247263 | 0.02450945 | 122.752 |
| gi 118403777 ref NM_001078685.1 | greenyellow | 281.44114 | 41.149203 | 0.9731902 | 0.00524833 | 20.44   |
| gi 115546452 dbj AK230971.1     | white       | 281.42033 | 24.984575 | 0.967096  | 0.00712939 | 60.298  |
| gi 115547797 dbj AK234773.1     | darkturquoi | 281.34218 | 28.604009 | 0.980702  | 0.00320879 | 25.942  |
| gnl UG Ssc#S26714441            | yellowgreer | 281.33247 | 16.572068 | 0.9821474 | 0.00285574 | 98.454  |
| gnl UG Ssc#S40272618            | greenyellow | 281.32717 | 38.279376 | 0.9582132 | 0.01018947 | 66.098  |
| gi 55741489 ref NM_214136.1     | purple      | 281.24854 | 54.304712 | 0.9744833 | 0.00487417 | 55.276  |
| gnl UG Ssc#S40214866            | magenta     | 280.93084 | 32.02135  | 0.9407014 | 0.01717904 | 18.74   |
| gi 115554409 dbj AK233419.1     | purple      | 280.88626 | 59.405906 | 0.9935257 | 0.00062475 | 283.672 |
| gnl UG Ssc#S18357620            | greenyellow | 280.71275 | 43.053809 | 0.9805152 | 0.00325539 | 28.918  |
| gnl UG Ssc#S35327002            | purple      | 280.68624 | 55.715411 | 0.9800678 | 0.00336795 | 17.584  |
| gi 194042528 ref XM_001927272.1 | purple      | 280.67965 | 58.703597 | 0.9910544 | 0.0010143  | 694.498 |
| gnl UG Ssc#S40584531            | yellow      | 280.67594 | 49.92202  | 0.8707359 | 0.05469475 | 11.396  |
| gnl UG Ssc#S18547766            | yellowgreer | 280.66991 | 16.82482  | 0.9850175 | 0.0021965  | 27.066  |
| gnl UG Ssc#S18272408            | purple      | 280.53445 | 55.584846 | 0.9792573 | 0.00357499 | 6.554   |
| gi 115547142 dbj AK231197.1     | blue        | 280.42454 | 161.39847 | 0.9443897 | 0.01561026 | 274.442 |
| gnl UG Ssc#S23772512            | lightyellow | 280.38984 | 24.415251 | 0.9144885 | 0.02962925 | 13.078  |
| gi 47523483 ref NM_214199.1     | brown       | 280.29865 | 96.950146 | 0.9753052 | 0.00464116 | 60.092  |
| gi 217416475 ref NM_001142669.1 | brown       | 280.20075 | 74.414518 | 0.9083303 | 0.03285555 | 14.822  |
| gnl UG Ssc#S35336579            | darkorange  | 280.19227 | 30.580565 | 0.9984303 | 7.46E-05   | 25.892  |
| gi 194038910 ref XM_001926121.1 | darkturquoi | 280.13134 | 21.337268 | 0.915477  | 0.0291214  | 6.552   |
| gi 153791354 ref NM_001099940.1 | black       | 279.97777 | 51.283989 | 0.9777576 | 0.00396873 | 32.462  |
| gi 115545765 dbj AK234198.1     | blue        | 279.88853 | 165.28183 | 0.9505921 | 0.01308528 | 46.678  |
| gi 194036140 ref XM_001929572.1 | yellow      | 279.86693 | 55.031271 | 0.895997  | 0.0396286  | 8.046   |
| gi 194042587 ref XM_001928493.1 | greenyellow | 279.60908 | 38.887529 | 0.955418  | 0.01122398 | 30.744  |
| gnl UG Ssc#S23689840            | turquoise   | 279.4419  | 259.08867 | 0.6760854 | 0.21021444 | 43.38   |
| gi 178056487 ref NM_001123204.1 | darkorange  | 279.19173 | 29.555378 | 0.9910127 | 0.00102139 | 46.534  |
| gi 47523769 ref NM_214356.1     | white       | 279.09878 | 20.275753 | 0.0032238 | 0.99589531 | 51.616  |
| gi 115546190 dbj AK240428.1     | darkturquoi | 279.03962 | 23.642612 | 0.9319041 | 0.02111197 | 9.72    |
| gnl UG Ssc#S26719940            | black       | 279.02177 | 48.480734 | 0.964076  | 0.00812938 | 4.962   |
| gi 115552220 dbj AK230529.1     | blue        | 279.00307 | 155.60033 | 0.9359748 | 0.01925948 | 51.286  |
| gi 73853889 ref NM_001032359.1  | yellowgreer | 278.95819 | 16.68118  | 0.9829415 | 0.00266765 | 304.17  |
| gi 47523689 ref NM_214316.1     | darkturquoi | 278.82066 | 28.614482 | 0.9806872 | 0.00321247 | 31.446  |
| gi 47523681 ref NM_214312.1     | brown       | 278.79905 | 70.0294   | 0.8929613 | 0.04135672 | 51.952  |
| gnl UG Ssc#S17509934            | brown       | 278.64209 | 86.014899 | 0.9446903 | 0.0154846  | 7.636   |
| gnl UG Ssc#S35173683            | magenta     | 278.58833 | 32.276067 | 0.9575202 | 0.01044291 | 21.694  |
| gnl UG Ssc#S34530890            | purple      | 278.5153  | 59.114684 | 0.9925296 | 0.00077422 | 15.69   |
| gnl UG Ssc#S17501425            | darkturquoi | 278.51039 | 29.261195 | 0.9880577 | 0.00156382 | 11.992  |
| gnl UG Ssc#S18354245            | blue        | 278.25467 | 173.30465 | 0.9634992 | 0.0083252  | 5.816   |
| gnl UG Ssc#S17525865            | brown       | 277.99147 | 81.023389 | 0.9276213 | 0.02311949 | 73.23   |
| gi 115545741 dbj AK234174.1     | turquoise   | 277.9259  | 178.59613 | 0.592857  | 0.29205697 | 26.714  |

|                                 |             |           |           |           |            |         |
|---------------------------------|-------------|-----------|-----------|-----------|------------|---------|
| gnl UG Ssc#S6085466             | darkorange  | 277.87623 | 27.329625 | 0.9747639 | 0.0047942  | 21.918  |
| gi 194474045 ref NM_001130534.1 | brown       | 277.82527 | 100.88569 | 0.9833337 | 0.00257634 | 24.342  |
| gnl UG Ssc#S23698009            | salmon      | 277.82331 | 45.918107 | 0.9906578 | 0.00108243 | 19.712  |
| gi 115549856 dbj AK238516.1     | purple      | 277.50802 | 53.377527 | 0.971128  | 0.00586354 | 39.77   |
| gi 194044114 ref XM_001924459.1 | brown       | 277.41401 | 100.87129 | 0.9829819 | 0.00265822 | 118.184 |
| gnl UG Ssc#S6085531             | brown       | 277.16956 | 88.040226 | 0.9535976 | 0.0119151  | 35.35   |
| gnl UG Ssc#S35723730            | grey60      | 277.1662  | 16.563383 | 0.9306675 | 0.02168555 | 55.59   |
| gnl UG Ssc#S26735265            | turquoise   | 277.02217 | 245.02307 | 0.6671998 | 0.21859627 | 21.628  |
| gnl UG Ssc#S18558304            | turquoise   | 277.00853 | 225.3237  | 0.6521551 | 0.23299217 | 10.502  |
| gi 178056489 ref NM_001123144.1 | pink        | 276.86464 | 20.098705 | -0.818963 | 0.08991382 | 61.576  |
| gi 194038369 ref XM_001929075.1 | midnightblu | 276.72102 | 33.92311  | 0.9636409 | 0.00827697 | 197.158 |
| gnl UG Ssc#S18546548            | salmon      | 276.70848 | 46.785934 | 0.9959718 | 0.00030672 | 7.452   |
| gi 115547364 dbj AK234737.1     | magenta     | 276.69465 | 32.183366 | 0.9697311 | 0.00629286 | 28.02   |
| gnl UG Ssc#S40494112            | yellow      | 276.47913 | 64.377252 | 0.9518974 | 0.0125727  | 14.654  |
| gnl UG Ssc#S18301666            | yellow      | 276.41084 | 53.849611 | 0.9190825 | 0.02729323 | 29.286  |
| gnl UG Ssc#S40376380            | blue        | 276.26305 | 122.78729 | 0.8779199 | 0.05025559 | 6.084   |
| gi 115552989 dbj AK239575.1     | turquoise   | 276.08034 | 239.45202 | 0.6546984 | 0.23054077 | 27.914  |
| gnl UG Ssc#S31104316            | black       | 275.93683 | 48.927346 | 0.9669051 | 0.0071913  | 6.656   |
| gi 194035566 ref XM_001925085.1 | yellow      | 275.86646 | 54.225961 | 0.8943222 | 0.04057915 | 14.904  |
| gnl UG Ssc#S17511285            | greenyellow | 275.84535 | 43.808046 | 0.9913637 | 0.00096219 | 316.952 |
| gi 115546313 dbj AK240551.1     | midnightblu | 275.81037 | 35.89878  | 0.9800172 | 0.00338076 | 43.152  |
| gi 115553094 dbj AK239680.1     | yellow      | 275.71976 | 68.24815  | 0.9761529 | 0.00440481 | 36.784  |
| gnl UG Ssc#S18358324            | turquoise   | 275.66026 | 224.8228  | 0.6363882 | 0.24834494 | 14.06   |
| gi 113205859 ref NM_001044605.1 | white       | 275.37082 | 20.085984 | -0.017271 | 0.97801037 | 30.194  |
| gnl UG Ssc#S18556801            | darkturquoi | 275.32154 | 20.343131 | 0.9046491 | 0.03483453 | 8.522   |
| gnl UG Ssc#S19540415            | purple      | 275.32153 | 56.17408  | 0.9819432 | 0.00290479 | 12.702  |
| gnl UG Ssc#S23758705            | yellow      | 275.29946 | 58.941013 | 0.931014  | 0.02152433 | 163.23  |
| gi 52351354 gb AY609784.1       | turquoise   | 275.21648 | 190.59513 | 0.5979169 | 0.28688092 | 23.84   |
| gnl UG Ssc#S40174573            | midnightblu | 275.10934 | 37.322642 | 0.9890982 | 0.00136418 | 3.15    |
| gnl UG Ssc#S18359209            | magenta     | 274.83828 | 15.305705 | -0.124435 | 0.84197452 | 30.386  |
| gnl UG Ssc#S40204438            | lightyellow | 274.61284 | 23.041037 | 0.898569  | 0.03818297 | 13.65   |
| gi 194034244 ref XM_001925555.1 | yellow      | 274.589   | 61.465916 | 0.9521231 | 0.01248474 | 42.694  |
| gnl UG Ssc#S23699836            | darkorange  | 274.52384 | 30.06409  | 0.9947405 | 0.00045751 | 28.398  |
| gi 115548500 dbj AK235117.1     | midnightblu | 274.42433 | 34.869913 | 0.9755364 | 0.00457629 | 130.348 |
| gi 115552638 dbj AK232843.1     | purple      | 274.42042 | 57.652738 | 0.987343  | 0.0017061  | 27.812  |
| gnl UG Ssc#S19541498            | darkred     | 274.27427 | 27.199722 | 0.9394488 | 0.01772284 | 23.344  |
| gi 115552127 dbj AK239320.1     | lightyellow | 274.20477 | 26.944437 | 0.9427553 | 0.01629943 | 3.2     |
| gnl UG Ssc#S18381258            | magenta     | 274.03114 | 33.385044 | 0.9839324 | 0.002439   | 62.466  |
| gnl UG Ssc#S18546477            | blue        | 273.93286 | 144.75246 | 0.9218822 | 0.02590021 | 87.928  |
| gnl UG Ssc#S40094285            | blue        | 273.59755 | 156.03512 | 0.9394795 | 0.01770946 | 20.838  |
| gi 115545930 dbj AK237371.1     | salmon      | 273.49592 | 46.482156 | 0.9936629 | 0.000605   | 54.336  |
| gi 194036414 ref XM_001927979.1 | white       | 273.09451 | 27.054019 | 0.9815833 | 0.00299191 | 31.42   |
| gnl UG Ssc#S17524473            | purple      | 273.02407 | 55.747813 | 0.9800526 | 0.00337178 | 39.648  |
| gnl UG Ssc#S17524578            | yellow      | 273.02284 | 51.588288 | 0.9177072 | 0.02798606 | 13.67   |
| gnl UG Ssc#S18553763            | blue        | 272.88602 | 167.52116 | 0.9547942 | 0.01145928 | 3.462   |
| gi 115553226 dbj AK233024.1     | green       | 272.73801 | 54.484319 | 0.8811953 | 0.04827138 | 66.804  |
| gnl UG Ssc#S17511723            | brown       | 272.69144 | 101.42976 | 0.9856165 | 0.00206629 | 13.692  |
| gi 115551465 dbj AK236143.1     | grey60      | 272.69118 | 15.6446   | 0.6703356 | 0.21562786 | 38.082  |

|                                 |             |           |           |           |            |          |
|---------------------------------|-------------|-----------|-----------|-----------|------------|----------|
| gnl UG Ssc#S40213312            | darkorange  | 272.57007 | 28.034826 | 0.980161  | 0.00334438 | 101.602  |
| gi 147900501 ref NM_001097506.1 | darkorange  | 272.54127 | 26.698089 | 0.9698146 | 0.00626689 | 19.088   |
| gi 194042141 ref XM_001929000.1 | white       | 272.53769 | 20.493918 | 0.0619638 | 0.92115574 | 25.904   |
| gi 194035178 ref XM_001925137.1 | yellow      | 272.50238 | 65.222652 | 0.9630445 | 0.00848067 | 20.332   |
| gnl UG Ssc#S22315401            | magenta     | 272.04018 | 30.978657 | 0.9339822 | 0.02015937 | 21.902   |
| gnl UG Ssc#S38481210            | yellow      | 272.00198 | 67.45397  | 0.9872022 | 0.00173461 | 6.49     |
| gi 115550039 dbj AK232274.1     | pink        | 271.63444 | 19.798221 | -0.843897 | 0.07227862 | 62.976   |
| gi 38455773 gb AY349420.1       | violet      | 271.60611 | 11.618418 | 0.8057376 | 0.09973295 | 11.304   |
| gnl UG Ssc#S18284292            | black       | 271.52048 | 43.618037 | 0.9403567 | 0.01732817 | 11.488   |
| gi 194039390 ref XM_001929570.1 | blue        | 271.38829 | 162.38026 | 0.9487752 | 0.01380984 | 651.3    |
| gi 125630297 ref NM_001005152.2 | greenyellow | 271.26061 | 37.05295  | 0.9436436 | 0.01592368 | 78.956   |
| gi 62082661 gb AY870324.1       | white       | 271.20331 | 20.097203 | -0.025678 | 0.96730874 | 53.694   |
| gi 194039687 ref XM_001928955.1 | blue        | 271.10757 | 160.32047 | 0.944717  | 0.01547343 | 116.384  |
| gi 194044682 ref XM_001928813.1 | blue        | 271.06938 | 147.42232 | 0.9224272 | 0.02563181 | 22.802   |
| gi 146198449 dbj AB292846.1     | turquoise   | 270.89045 | 194.343   | 0.6195194 | 0.26505968 | 6.186    |
| gnl UG Ssc#S34532931            | salmon      | 270.84359 | 43.483746 | 0.9777394 | 0.00397359 | 5.554    |
| gnl UG Ssc#S27601831            | turquoise   | 270.54739 | 237.28953 | 0.6865559 | 0.20045616 | 17.892   |
| gnl UG Ssc#S40588989            | purple      | 270.52905 | 53.801455 | 0.9728546 | 0.00534689 | 23.394   |
| gnl UG Ssc#S19546269            | purple      | 270.20472 | 54.672414 | 0.9763965 | 0.00433766 | 20.54    |
| gnl UG Ssc#S29456965            | darkorange  | 270.12866 | 29.199129 | 0.9892687 | 0.00133234 | 12.698   |
| gi 148230690 ref NM_001097489.1 | lightyellow | 270.04816 | 21.239545 | 0.8789918 | 0.04960344 | 7.344    |
| gi 194043957 ref XM_001925803.1 | brown       | 269.91795 | 80.185538 | 0.9260034 | 0.02389306 | 1230.364 |
| gi 115550007 dbj AK232242.1     | brown       | 269.62718 | 72.757439 | 0.9051609 | 0.03455717 | 115.78   |
| gi 194034713 ref XM_001925291.1 | blue        | 269.53929 | 123.32581 | 0.8809748 | 0.04840417 | 41.894   |
| gi 115552041 dbj AK239234.1     | blue        | 269.50948 | 163.42455 | 0.9492104 | 0.01363512 | 12.232   |
| gnl UG Ssc#S31134214            | turquoise   | 269.26206 | 240.65264 | 0.6848624 | 0.20202566 | 7.482    |
| gnl UG Ssc#S18554829            | brown       | 269.19839 | 76.767024 | 0.9177041 | 0.02798762 | 15.724   |
| gnl UG Ssc#S18551055            | blue        | 269.18131 | 170.3647  | 0.9589265 | 0.00993076 | 5.776    |
| gnl UG Ssc#S16517726            | brown       | 269.03374 | 81.117867 | 0.9324003 | 0.02088321 | 40.014   |
| gi 47523039 ref NM_214116.1     | brown       | 268.86759 | 90.157182 | 0.9576347 | 0.01040088 | 90.334   |
| gnl UG Ssc#S26647414            | yellowgreer | 268.82416 | 17.353082 | 0.9919825 | 0.00086073 | 6.134    |
| gnl UG Ssc#S40433705            | midnightblt | 268.74165 | 37.782536 | 0.9916364 | 0.00091701 | 3.814    |
| gi 115551408 dbj AK236086.1     | darkred     | 268.66948 | 28.638062 | 0.9512533 | 0.01282479 | 36.934   |
| gi 194038735 ref XM_001929188.1 | midnightblt | 268.43412 | 35.574276 | 0.9780344 | 0.00389506 | 37.396   |
| gi 194035296 ref XM_001927594.1 | midnightblt | 268.4127  | 37.717387 | 0.9907659 | 0.00106372 | 111.998  |
| gi 194034443 ref XM_001928249.1 | midnightblt | 268.32939 | 33.525884 | 0.9597192 | 0.00964581 | 36.58    |
| gnl UG Ssc#S26394012            | turquoise   | 268.21285 | 181.39916 | 0.5992298 | 0.28554175 | 6.868    |
| gnl UG Ssc#S19540505            | violet      | 268.17035 | 15.877291 | 0.9117808 | 0.03103463 | 44.552   |
| gnl UG Ssc#S18551577            | salmon      | 268.14119 | 19.208728 | 0.7998623 | 0.10419327 | 45.57    |
| gi 115312275 ref NM_001048232.1 | brown       | 268.1307  | 95.000322 | 0.9680786 | 0.00681344 | 10.906   |
| gi 115551885 dbj AK236292.1     | darkgreen   | 268.11886 | 22.87156  | 0.9136193 | 0.03007811 | 20.99    |
| gnl UG Ssc#S35326006            | darkgreen   | 267.99013 | 19.579529 | 0.7922505 | 0.11005876 | 114.164  |
| gi 194036762 ref XM_001925928.1 | green       | 267.95203 | 47.526277 | 0.8521148 | 0.06673362 | 25.078   |
| gi 115552402 dbj AK236407.1     | turquoise   | 267.7981  | 225.40412 | 0.6762366 | 0.21007263 | 8.818    |
| gnl UG Ssc#S16514640            | brown       | 267.74779 | 99.566837 | 0.9812732 | 0.00306764 | 32.42    |
| gnl UG Ssc#S17513113            | blue        | 267.50024 | 173.04134 | 0.9636801 | 0.00826361 | 33.854   |

yellowgreer

|                                 |             |           |           |           |            |         |
|---------------------------------|-------------|-----------|-----------|-----------|------------|---------|
| gnl UG Ssc#S17525035            | pink        | 267.07496 | 19.732357 | -0.831897 | 0.08061784 | 43.14   |
| gnl UG Ssc#S31119453            | yellow      | 266.98891 | 61.728515 | 0.9666939 | 0.00726003 | 19.176  |
| gnl UG Ssc#S18547573            | brown       | 266.82231 | 80.103207 | 0.9263831 | 0.02371077 | 196.18  |
| gnl UG Ssc#S26391783            | greenyellow | 266.66841 | 36.778702 | 0.9482122 | 0.01403692 | 19.562  |
| gnl UG Ssc#S17511386            | yellowgreer | 266.63731 | 17.476911 | 0.994607  | 0.00047503 | 98.316  |
| gi 47522983 ref NM_214086.1     | white       | 266.58615 | 19.597233 | -0.054986 | 0.93002534 | 66.432  |
| gi 194044465 ref XM_001928874.1 | purple      | 266.51752 | 58.073422 | 0.9890083 | 0.00138107 | 15.546  |
| gi 83616153 gb DQ241739.1       | grey60      | 266.47804 | 15.246893 | 0.7181475 | 0.17182836 | 9.014   |
| gi 115555129 dbj AK240329.1     | blue        | 266.47513 | 166.12735 | 0.9542184 | 0.0116779  | 132.538 |
| gi 194037329 ref XM_001927218.1 | salmon      | 266.43039 | 46.89398  | 0.9959727 | 0.00030661 | 6.148   |
| gi 115546753 dbj AK237599.1     | midnightblu | 266.38946 | 35.335547 | 0.9770015 | 0.00417235 | 60.28   |
| gi 194035848 ref XM_001928966.1 | purple      | 266.14841 | 59.091774 | 0.9925525 | 0.00077066 | 86.446  |
| gi 148234109 ref NM_001093735.1 | darkgrey    | 265.9824  | 15.876491 | 0.9782782 | 0.00383052 | 25.394  |
| gnl UG Ssc#S39900214            | brown       | 265.56521 | 82.558797 | 0.9356623 | 0.01939976 | 9.608   |
| gnl UG Ssc#S18552012            | greenyellow | 265.49365 | 39.034005 | 0.9607477 | 0.00928023 | 38.242  |
| gnl UG Ssc#S39872348            | brown       | 265.44274 | 74.253216 | 0.9086385 | 0.03269157 | 29.118  |
| gi 194044132 ref XM_001927798.1 | skyblue     | 265.44024 | 21.07904  | 0.9521752 | 0.01246444 | 98.936  |
| gi 113205907 ref NM_001044616.1 | purple      | 265.27491 | 60.46131  | 0.9974441 | 0.00015506 | 34.992  |
| gnl UG Ssc#S19540060            | purple      | 265.24245 | 61.044118 | 0.9994816 | 1.42E-05   | 11.35   |
| gnl UG Ssc#S22284504            | brown       | 265.09926 | 99.543404 | 0.9813933 | 0.00303824 | 13.908  |
| gnl UG Ssc#S31986306            | salmon      | 264.99291 | 42.054618 | 0.9707873 | 0.00596732 | 9.052   |
| gi 52351697 gb AY610127.1       | brown       | 264.87282 | 76.145453 | 0.9155783 | 0.02906951 | 96.17   |
| gi 178056883 ref NM_001123198.1 | grey60      | 264.84055 | 16.516072 | 0.9472364 | 0.01443337 | 32.538  |
| gnl UG Ssc#S6063275             | yellow      | 264.82255 | 64.958401 | 0.949333  | 0.01358606 | 34.994  |
| gi 115554132 dbj AK233342.1     | purple      | 264.77325 | 56.497492 | 0.9832186 | 0.00260305 | 6.766   |
| gnl UG Ssc#S27600966            | purple      | 264.66895 | 60.639325 | 0.9980885 | 0.00010029 | 18.716  |
| gi 47523533 ref NM_214229.1     | salmon      | 264.61466 | 44.000277 | 0.9814405 | 0.00302671 | 5.162   |
| gi 115552791 dbj AK239385.1     | blue        | 264.48854 | 149.11736 | 0.9308249 | 0.02161226 | 23.766  |
| gi 47523067 ref NM_214132.1     | darkorange  | 264.48695 | 28.85163  | 0.9866174 | 0.00185468 | 10.434  |
| gnl UG Ssc#S18290449            | darkturquoi | 264.03112 | 27.470295 | 0.9745561 | 0.00485338 | 195.59  |
| gi 115545973 dbj AK237414.1     | purple      | 263.67319 | 61.091068 | 0.9996566 | 7.64E-06   | 66.21   |
| gnl UG Ssc#S40219335            | brown       | 263.48101 | 93.217749 | 0.9658028 | 0.0075523  | 14.194  |
| gnl UG Ssc#S23771394            | yellow      | 263.45009 | 61.93984  | 0.9321679 | 0.02099024 | 9.77    |
| gnl UG Ssc#S40271107            | purple      | 263.35143 | 58.721463 | 0.9912396 | 0.00098299 | 11.784  |
| gnl UG Ssc#S17513979            | darkgreen   | 263.08928 | 22.096099 | 0.8530205 | 0.06613097 | 42.468  |
| gi 115552281 dbj AK230590.1     | brown       | 262.90603 | 80.32298  | 0.9271032 | 0.02336629 | 100.872 |
| gnl UG Ssc#S18278819            | black       | 262.78175 | 49.26374  | 0.9686396 | 0.00663519 | 4.698   |
| gnl UG Ssc#S18355852            | turquoise   | 262.65183 | 232.81185 | 0.6467166 | 0.23825758 | 18.82   |
| gi 194039697 ref XM_001929172.1 | black       | 262.51198 | 37.420571 | 0.8985072 | 0.03821748 | 88.968  |
| gi 115548969 dbj AK235372.1     | blue        | 262.49067 | 153.99621 | 0.9341353 | 0.02008977 | 11.888  |
| gnl UG Ssc#S34509960            | darkorange  | 262.44573 | 28.068614 | 0.980544  | 0.00324821 | 24.158  |
| gnl UG Ssc#S40110548            | violet      | 262.44094 | 16.55146  | 0.904603  | 0.03485956 | 11.05   |
| gnl UG Ssc#S23696740            | blue        | 262.33835 | 163.51154 | 0.9504733 | 0.01313226 | 30.234  |
| gnl UG Ssc#S6077016             | darkorange  | 262.22796 | 28.127555 | 0.981575  | 0.00299394 | 13.16   |
| gnl UG Ssc#S26720320            | grey60      | 262.21938 | 16.02304  | 0.787978  | 0.11339315 | 5.996   |
| gi 146741279 dbj AB271920.1     | darkgreen   | 262.2035  | 21.67972  | 0.8499872 | 0.06815603 | 34.416  |
| gnl UG Ssc#S6073264             | salmon      | 261.95464 | 42.993045 | 0.976715  | 0.00425036 | 27.264  |
| gnl UG Ssc#S18382627            | turquoise   | 261.82343 | 174.51427 | 0.5850884 | 0.30005066 | 10.15   |

|                                 |             |           |           |           |            |         |
|---------------------------------|-------------|-----------|-----------|-----------|------------|---------|
| gi 194041357 ref XM_001926917.1 | purple      | 261.81917 | 57.559077 | 0.9872302 | 0.00172892 | 106.948 |
| gnl UG Ssc#S35326767            | yellow      | 261.70408 | 69.385115 | 0.9869667 | 0.00178264 | 27.338  |
| gnl UG Ssc#S39768843            | midnightblu | 261.66521 | 38.469292 | 0.9968677 | 0.00021035 | 4.918   |
| gi 115548575 dbj AK231559.1     | green       | 261.61413 | 40.359471 | 0.8176759 | 0.09085544 | 12.028  |
| gnl UG Ssc#S6057912             | salmon      | 261.47938 | 44.3853   | 0.9845743 | 0.00229452 | 8.69    |
| gi 115550272 dbj AK235751.1     | darkorange  | 261.47003 | 29.847643 | 0.9934794 | 0.00063145 | 47.9    |
| gi 194036390 ref XM_001929343.1 | greenyellow | 261.37652 | 38.892863 | 0.9625375 | 0.00865514 | 57.822  |
| gnl UG Ssc#S17500019            | yellow      | 261.37141 | 33.39488  | 0.7436388 | 0.14967986 | 10.06   |
| gi 115545598 dbj AK230713.1     | yellow      | 261.21471 | 54.659015 | 0.9031734 | 0.03563818 | 26.69   |
| gi 115546507 dbj AK231026.1     | blue        | 261.19106 | 167.7916  | 0.9565774 | 0.01079093 | 2.072   |
| gi 115550060 dbj AK232295.1     | magenta     | 261.08786 | 13.389656 | -0.292118 | 0.63342294 | 53.466  |
| gi 194043337 ref XM_001926296.1 | midnightblu | 260.99447 | 36.17683  | 0.9839341 | 0.00243862 | 6.068   |
| gi 115546331 dbj AK230850.1     | brown       | 260.86155 | 90.636492 | 0.9588211 | 0.00996886 | 83.454  |
| gnl UG Ssc#S19539315            | brown       | 260.68979 | 84.281741 | 0.9429772 | 0.0162053  | 14.826  |
| gnl UG Ssc#S46917266            | brown       | 260.51914 | 82.437683 | 0.9380432 | 0.01833958 | 20.642  |
| gi 115554725 dbj AK237136.1     | lightyellow | 260.19794 | 26.064932 | 0.9366354 | 0.01896412 | 23.748  |
| gi 115552177 dbj AK230486.1     | greenyellow | 259.8026  | 37.985125 | 0.9475009 | 0.01432556 | 993.234 |
| gi 115554566 dbj AK236976.1     | purple      | 259.76948 | 60.83209  | 0.9987582 | 5.25E-05   | 22.906  |
| gi 147900046 ref NM_001097474.1 | brown       | 259.70066 | 87.350598 | 0.9515242 | 0.01271855 | 150.368 |
| gnl UG Ssc#S18549395            | greenyellow | 259.44111 | 40.75458  | 0.9694555 | 0.00637871 | 18.834  |
| gnl UG Ssc#S6082550             | salmon      | 259.31213 | 41.063036 | 0.9658651 | 0.00753175 | 20.934  |
| gnl UG Ssc#S40106937            | salmon      | 259.09389 | 45.273035 | 0.9881252 | 0.0015506  | 6.98    |
| gi 194038223 ref XM_001926312.1 | darkgreen   | 259.09035 | 17.598721 | 0.7552606 | 0.13988339 | 22.836  |
| gnl UG Ssc#S23775145            | yellowgreer | 258.88003 | 16.537124 | 0.9808968 | 0.00316043 | 29.508  |
| gnl UG Ssc#S18358663            | brown       | 258.86582 | 66.945507 | 0.8860327 | 0.04538761 | 56.29   |
| gi 47522897 ref NM_214039.1     | lightyellow | 258.86529 | 20.812611 | 0.8737786 | 0.05280011 | 14.42   |
| gnl UG Ssc#S40007606            | yellow      | 258.69045 | 35.228692 | 0.7561447 | 0.13914617 | 13.312  |
| gnl UG Ssc#S16513635            | black       | 258.6506  | 48.373195 | 0.9642157 | 0.00808216 | 4.682   |
| gnl UG Ssc#S19546106            | salmon      | 258.4944  | 37.841466 | 0.9496805 | 0.01344723 | 210.746 |
| gi 194044987 ref XM_001927848.1 | yellowgreer | 258.44053 | 16.883742 | 0.9867975 | 0.00181742 | 39.472  |
| gnl UG Ssc#S17525713            | salmon      | 258.42042 | 45.914682 | 0.9912452 | 0.00098206 | 11.668  |
| gi 115553014 dbj AK239600.1     | purple      | 258.38101 | 56.771176 | 0.98426   | 0.00236491 | 19.254  |
| gnl UG Ssc#S40215438            | white       | 258.31276 | 24.285459 | 0.9697593 | 0.00628407 | 8.29    |
| gnl UG Ssc#S29978365            | brown       | 258.29809 | 75.555779 | 0.9184719 | 0.02760014 | 28.712  |
| gnl UG Ssc#S18358217            | salmon      | 258.26546 | 45.461666 | 0.9886864 | 0.0014421  | 11.538  |
| gnl UG Ssc#S40500952            | darkorange  | 257.98043 | 25.901908 | 0.9632694 | 0.00840367 | 84.418  |
| gnl UG Ssc#S40323161            | blue        | 257.63076 | 162.09611 | 0.9486658 | 0.01385386 | 2.65    |
| gi 115546586 dbj AK234424.1     | greenyellow | 257.58675 | 42.404615 | 0.9830836 | 0.00263445 | 52.43   |
| gi 194037379 ref XM_001925252.1 | black       | 257.36407 | 48.768204 | 0.9674276 | 0.00702224 | 56.718  |
| gnl UG Ssc#S39967671            | lightcyan   | 257.19501 | 31.359143 | 0.9406913 | 0.01718342 | 18.052  |
| gi 115547849 dbj AK234825.1     | blue        | 257.03735 | 143.56387 | 0.9182924 | 0.02769057 | 42.812  |
| gi 52351201 gb AY609606.1       | brown       | 256.99576 | 72.039257 | 0.9051381 | 0.03456951 | 14.52   |
| gi 218082010 ref NM_001142666.1 | yellow      | 256.83355 | 52.818186 | 0.9229089 | 0.02539531 | 28.792  |
| gnl UG Ssc#S40265049            | blue        | 256.80043 | 142.8111  | 0.9203724 | 0.0266485  | 1.95    |
| gnl UG Ssc#S31120797            | blue        | 256.76481 | 158.16411 | 0.9420713 | 0.01659068 | 8.336   |
| gi 115547758 dbj AK231416.1     | turquoise   | 256.5298  | 196.99024 | 0.6197904 | 0.26478895 | 21.152  |
| gnl UG Ssc#S26719435            | brown       | 256.47954 | 94.011894 | 0.9671994 | 0.00709592 | 149.556 |
| gnl UG Ssc#S41575462            | grey60      | 256.07995 | 10.986621 | 0.5080793 | 0.38211767 | 64.71   |

|                                 |             |           |           |           |            |         |
|---------------------------------|-------------|-----------|-----------|-----------|------------|---------|
| gi 194035627 ref XM_001924280.1 | yellowgreer | 256.04896 | 17.576909 | 0.9952946 | 0.00038719 | 43.336  |
| gi 47522629 ref NM_213928.1     | purple      | 255.89962 | 54.177065 | 0.9749526 | 0.00474067 | 34.844  |
| gnl UG Ssc#S18551209            | greenyellow | 255.83873 | 35.972381 | 0.9412072 | 0.01696103 | 118.936 |
| gnl UG Ssc#S40037863            | purple      | 255.49954 | 54.860029 | 0.9769808 | 0.00417797 | 25.862  |
| gi 194038037 ref XM_001929120.1 | greenyellow | 255.49732 | 36.410026 | 0.9440937 | 0.01573437 | 53.234  |
| gnl UG Ssc#S18548354            | magenta     | 255.34145 | 32.499648 | 0.983204  | 0.00260643 | 12.002  |
| gi 115547886 dbj AK234862.1     | white       | 255.31473 | 19.012657 | -0.054025 | 0.93124665 | 19.274  |
| gnl UG Ssc#S6058133             | brown       | 255.31109 | 84.254664 | 0.9387785 | 0.01801609 | 6.122   |
| gi 194039264 ref XM_001927148.1 | white       | 255.26135 | 19.096486 | -0.068135 | 0.91331527 | 17.518  |
| gnl UG Ssc#S18267480            | black       | 254.99816 | 32.926614 | 0.8709971 | 0.05453129 | 10.082  |
| gi 194038313 ref XM_001925341.1 | white       | 254.77158 | 19.529487 | -0.042991 | 0.94527885 | 22.672  |
| gnl UG Ssc#S18551845            | purple      | 254.7617  | 60.647069 | 0.9981554 | 9.51E-05   | 18.634  |
| gnl UG Ssc#S23696659            | salmon      | 254.59811 | 45.318997 | 0.988159  | 0.00154398 | 27.298  |
| gi 194035722 ref XM_001926997.1 | blue        | 254.48902 | 142.43184 | 0.9161316 | 0.02878663 | 68.682  |
| gi 194033594 ref XM_001927795.1 | salmon      | 254.40835 | 42.216276 | 0.9708216 | 0.00595686 | 95.586  |
| gi 178056622 ref NM_001123213.1 | darkgrey    | 254.39471 | 15.241757 | 0.9941603 | 0.00053523 | 71.506  |
| gi 52351176 gb AY609581.1       | yellow      | 254.3139  | 65.216028 | 0.970971  | 0.00591129 | 28.81   |
| gi 115555639 dbj AK237272.1     | purple      | 254.16156 | 52.849035 | 0.9690471 | 0.00650668 | 95.868  |
| gi 115553719 dbj AK239906.1     | white       | 254.02733 | 19.617716 | 0.0402393 | 0.9487796  | 65.184  |
| gnl UG Ssc#S23755435            | yellow      | 253.93179 | 64.662528 | 0.9659466 | 0.00750488 | 391.902 |
| gi 57527981 ref NM_001009576.1  | yellow      | 253.34849 | 64.271928 | 0.9751713 | 0.00467887 | 51.892  |
| gi 115553060 dbj AK239646.1     | purple      | 253.24867 | 54.881603 | 0.9774182 | 0.00405972 | 64.674  |
| gnl UG Ssc#S26732866            | black       | 253.1739  | 40.388268 | 0.9199247 | 0.02687173 | 13.8    |
| gi 113205825 ref NM_001044594.1 | purple      | 253.12759 | 58.325082 | 0.9898258 | 0.00123004 | 33.38   |
| gi 115548176 dbj AK234948.1     | pink        | 253.03255 | 21.131573 | -0.838402 | 0.07606253 | 305.126 |
| gi 194037755 ref XM_001925059.1 | magenta     | 253.01114 | 29.733743 | 0.9271011 | 0.02336731 | 14.016  |
| gnl UG Ssc#S16764576            | darkorange  | 252.77204 | 26.762499 | 0.9702613 | 0.00612871 | 6.636   |
| gnl UG Ssc#S40146833            | greenyellow | 252.72015 | 39.356647 | 0.9553737 | 0.01124065 | 27.942  |
| gi 194036252 ref XM_001929660.1 | purple      | 252.64062 | 55.105194 | 0.9781149 | 0.00387369 | 46.382  |
| gi 77681320 dbj AB236885.1      | brown       | 252.63376 | 80.689234 | 0.931935  | 0.02109771 | 20.618  |
| gnl UG Ssc#S17515082            | darkorange  | 252.25414 | 27.67178  | 0.9773575 | 0.00407606 | 1.808   |
| gnl UG Ssc#S6055548             | black       | 252.18505 | 46.610199 | 0.9557252 | 0.01110872 | 25.564  |
| gi 115549416 dbj AK235438.1     | midnightblu | 252.11601 | 34.724349 | 0.97268   | 0.00539844 | 26.508  |
| gi 47523715 ref NM_214327.1     | grey60      | 251.96233 | 16.63106  | 0.9610407 | 0.00917691 | 11.418  |
| gnl UG Ssc#S25135543            | brown       | 251.90426 | 86.817329 | 0.9491636 | 0.0136539  | 4.204   |
| gnl UG Ssc#S40577963            | blue        | 251.90241 | 158.62255 | 0.9434205 | 0.01601775 | 12.264  |
| gnl UG Ssc#S19539468            | black       | 251.79439 | 27.034824 | 0.8253089 | 0.08531379 | 45.754  |
| gnl UG Ssc#S18546455            | yellow      | 251.7528  | 62.82189  | 0.9566223 | 0.01077425 | 79.162  |
| gnl UG Ssc#S29979252            | yellow      | 251.67653 | 72.095919 | 0.9901419 | 0.00117323 | 11.038  |
| gi 115546849 dbj AK237695.1     | brown       | 251.23314 | 85.80157  | 0.9479832 | 0.01412966 | 22.796  |
| gi 194044879 ref XM_001925452.1 | brown       | 251.18813 | 93.780591 | 0.9669236 | 0.00718531 | 8.118   |
| gnl UG Ssc#S19538970            | grey60      | 251.15197 | 15.007174 | 0.6363948 | 0.2483385  | 212.876 |
| gnl UG Ssc#S23770014            | midnightblu | 250.72916 | 38.406207 | 0.9959011 | 0.00031482 | 28.822  |
| gnl UG Ssc#S19541354            | purple      | 250.6966  | 56.764014 | 0.9843379 | 0.0023474  | 10.364  |
| gi 164518957 ref NM_001113287.1 | skyblue     | 250.65295 | 24.382618 | 0.9820122 | 0.0028882  | 726.32  |
| gi 114326182 ref NM_001048072.1 | salmon      | 250.62737 | 42.977575 | 0.9765453 | 0.00429681 | 330.448 |
| gi 115550183 dbj AK235662.1     | yellow      | 250.57515 | 61.311507 | 0.9615154 | 0.00901035 | 10.726  |
| gi 115555063 dbj AK240262.1     | purple      | 250.53408 | 59.076933 | 0.9926086 | 0.00076197 | 42.774  |

|                                 |             |           |           |           |            |         |
|---------------------------------|-------------|-----------|-----------|-----------|------------|---------|
| gnl UG Ssc#S34516523            | darkgrey    | 250.41538 | 17.037549 | 0.9919954 | 0.00085866 | 9.286   |
| gnl UG Ssc#S18546458            | blue        | 250.07516 | 148.19598 | 0.9278709 | 0.02300085 | 2.386   |
| gnl UG Ssc#S18359204            | blue        | 249.87557 | 117.22238 | 0.8744718 | 0.05237142 | 99.156  |
| gnl UG Ssc#S41577334            | midnightblt | 249.73377 | 35.934349 | 0.9831944 | 0.00260865 | 19.446  |
| gi 115551503 dbj AK238967.1     | skyblue     | 249.62062 | 24.117044 | 0.9794013 | 0.00353792 | 13.502  |
| gnl UG Ssc#S17515809            | blue        | 249.52129 | 140.62676 | 0.9149819 | 0.02937538 | 53.774  |
| gi 115546917 dbj AK240563.1     | yellowgreer | 249.40383 | 17.005674 | 0.9893695 | 0.00131362 | 73.322  |
| gi 194041423 ref XM_001926755.1 | turquoise   | 248.83155 | 192.44318 | 0.6076033 | 0.27704011 | 52.394  |
| gnl UG Ssc#S18359685            | turquoise   | 248.68645 | 196.34553 | 0.6189095 | 0.26566953 | 71.286  |
| gnl UG Ssc#S39888860            | black       | 248.36816 | 35.085548 | 0.8779147 | 0.05025876 | 29.396  |
| gnl UG Ssc#S23690802            | yellow      | 248.33277 | 58.401722 | 0.935997  | 0.01924954 | 108.47  |
| gnl UG Ssc#S23757653            | darkturquoi | 248.28843 | 21.458938 | 0.9155373 | 0.02909052 | 9.47    |
| gi 50657387 ref NM_001002824.1  | darkorange  | 248.23391 | 27.278293 | 0.9744257 | 0.00489064 | 11.6    |
| gnl UG Ssc#S23693871            | lightyellow | 248.13967 | 17.799633 | 0.8423752 | 0.07332065 | 16.074  |
| gi 194033418 ref XM_001924233.1 | darkturquoi | 248.13925 | 23.241501 | 0.9388242 | 0.01799607 | 68.726  |
| gnl UG Ssc#S18546946            | lightcyan   | 248.03612 | 34.556257 | 0.961961  | 0.00885489 | 3.562   |
| gnl UG Ssc#S40471332            | darkorange  | 247.95339 | 27.866212 | 0.9789909 | 0.00364393 | 12.44   |
| gnl UG Ssc#S40442878            | yellow      | 247.84649 | 63.710506 | 0.9757073 | 0.00452855 | 87.674  |
| gnl UG Ssc#S6666342             | darkturquoi | 247.67549 | 21.601326 | 0.9163634 | 0.02866841 | 16.39   |
| gnl UG Ssc#S18283235            | turquoise   | 247.52903 | 190.8886  | 0.5989908 | 0.28578539 | 25.704  |
| gi 115550976 dbj AK238837.1     | salmon      | 247.49222 | 39.881058 | 0.9576142 | 0.0104084  | 71.458  |
| gi 52351956 gb AY610374.1       | lightcyan   | 246.991   | 34.853571 | 0.9645471 | 0.00797054 | 64.008  |
| gnl UG Ssc#S40170485            | midnightblt | 246.95111 | 35.696887 | 0.9750214 | 0.00472118 | 56.262  |
| gnl UG Ssc#S17526634            | brown       | 246.9353  | 89.164562 | 0.9528802 | 0.01219117 | 22.218  |
| gnl UG Ssc#S6032057             | purple      | 246.74258 | 58.633738 | 0.9911002 | 0.00100652 | 7.03    |
| gi 194044929 ref XM_001925991.1 | yellow      | 246.63541 | 54.536549 | 0.8871327 | 0.04473972 | 45.65   |
| gi 47522861 ref NM_214020.1     | white       | 246.31207 | 18.935647 | 0.0711732 | 0.90945608 | 25.604  |
| gi 115546548 dbj AK234386.1     | blue        | 246.23988 | 150.77977 | 0.9321761 | 0.02098648 | 9.412   |
| gi 115553370 dbj AK236573.1     | brown       | 246.14207 | 92.015184 | 0.9614593 | 0.00902999 | 75.048  |
| gnl UG Ssc#S18547043            | yellow      | 246.09049 | 48.763214 | 0.9040595 | 0.03515492 | 26.804  |
| gnl UG Ssc#S17509925            | blue        | 246.09036 | 141.56883 | 0.916866  | 0.02841257 | 33.558  |
| gnl UG Ssc#S18354739            | violet      | 246.00355 | 3.4010785 | 0.167894  | 0.78723932 | 9.184   |
| gi 194036424 ref XM_001925710.1 | blue        | 245.92683 | 135.04554 | 0.9075298 | 0.03328276 | 52.748  |
| gi 115550392 dbj AK238657.1     | white       | 245.89247 | 20.734392 | 0.9358874 | 0.01929868 | 10.742  |
| gnl UG Ssc#S23689821            | blue        | 245.8585  | 144.33429 | 0.9209418 | 0.02636551 | 9.222   |
| gi 52352065 gb AY610481.1       | lightgreen  | 245.29264 | 24.008188 | 0.9476678 | 0.01425768 | 1.724   |
| gi 194044044 ref XM_001927332.1 | blue        | 245.20321 | 131.33973 | 0.8971678 | 0.03896841 | 11.434  |
| gi 194043649 ref XM_001925542.1 | midnightblt | 245.17575 | 30.954993 | 0.947425  | 0.01435649 | 14.376  |
| gnl UG Ssc#S39773791            | greenyellow | 244.9057  | 34.147358 | 0.9212973 | 0.02618931 | 33.7    |
| gnl UG Ssc#S35329994            | purple      | 244.90525 | 57.935341 | 0.9886829 | 0.00144277 | 10.078  |
| gnl UG Ssc#S29485097            | green       | 244.4698  | 47.390464 | 0.8512606 | 0.06730355 | 2.71    |
| gnl UG Ssc#S6074613             | yellowgreer | 244.23111 | 16.874569 | 0.9862852 | 0.00192408 | 26.724  |
| gi 113205849 ref NM_001044600.1 | lightcyan   | 244.19616 | 34.08351  | 0.9577619 | 0.01035429 | 24.618  |
| gi 115547309 dbj AK234682.1     | black       | 243.95479 | 36.647408 | 0.8921484 | 0.04182346 | 23.882  |
| gnl UG Ssc#S18382807            | pink        | 243.94057 | 20.402821 | -0.880378 | 0.04876382 | 125.968 |
| gnl UG Ssc#S26725722            | purple      | 243.36115 | 58.349209 | 0.9899348 | 0.00121034 | 9.574   |
| gnl UG Ssc#S18557342            | turquoise   | 243.35762 | 179.81496 | 0.5905648 | 0.29440971 | 27.922  |
| gnl UG Ssc#S23698058            | turquoise   | 243.34394 | 159.68659 | 0.5650165 | 0.32095787 | 20.664  |



|                                 |             |           |           |           |            |         |
|---------------------------------|-------------|-----------|-----------|-----------|------------|---------|
| gi 113205905 ref NM_001044614.1 | darkorange  | 243.17602 | 26.82828  | 0.9717595 | 0.00567275 | 199.308 |
| gi 115548717 dbj AK231783.1     | purple      | 243.03405 | 58.52469  | 0.9906033 | 0.0010919  | 67.262  |
| gi 194034359 ref XM_001927037.1 | turquoise   | 242.96303 | 193.52867 | 0.6119489 | 0.27265482 | 54.722  |
| gi 194036392 ref XM_001929357.1 | black       | 242.82882 | 42.727955 | 0.9374862 | 0.01858588 | 6.396   |
| gnl UG Ssc#S16350749            | midnightblu | 242.71459 | 36.621133 | 0.983415  | 0.00255754 | 13.404  |
| gi 194040487 ref XM_001926988.1 | blue        | 242.65951 | 140.91527 | 0.9158093 | 0.02895132 | 13.69   |
| gnl UG Ssc#S17516151            | yellow      | 242.62767 | 64.99374  | 0.9625018 | 0.00866746 | 25.99   |
| gi 115553998 dbj AK233207.1     | midnightblu | 242.58079 | 37.274468 | 0.9904458 | 0.00111945 | 14.384  |
| gi 190360618 ref NM_001128433.1 | purple      | 242.57567 | 58.954058 | 0.9921328 | 0.00083667 | 17.088  |
| gi 115548441 dbj AK235058.1     | brown       | 242.40398 | 86.869536 | 0.948812  | 0.01379504 | 25.096  |
| gnl UG Ssc#S35164631            | lightcyan   | 242.40308 | 34.029854 | 0.9589318 | 0.00992885 | 1.456   |
| gnl UG Ssc#S17511033            | darkturquoi | 242.39353 | 26.435139 | 0.9656242 | 0.00761134 | 22.538  |
| gnl UG Ssc#S16511729            | brown       | 242.20777 | 78.865778 | 0.9237618 | 0.02497829 | 83.156  |
| gi 47523501 ref NM_214213.1     | purple      | 242.04855 | 58.213483 | 0.9893884 | 0.00131013 | 11.924  |
| gnl UG Ssc#S23696008            | blue        | 241.87905 | 117.83286 | 0.8796151 | 0.04922548 | 8.198   |
| gnl UG Ssc#S39853219            | salmon      | 241.68953 | 38.912327 | 0.9516443 | 0.01267155 | 13.852  |
| gnl UG Ssc#S6047303             | purple      | 241.66872 | 57.013531 | 0.9852216 | 0.00215185 | 35.854  |
| gi 54020965 ref NM_001005726.1  | magenta     | 241.61313 | 15.990352 | 0.0110412 | 0.98594218 | 360.584 |
| gnl UG Ssc#S40127774            | magenta     | 241.57577 | 29.388987 | 0.9235551 | 0.02507916 | 41.808  |
| gnl UG Ssc#S34530291            | skyblue     | 241.5678  | 23.924951 | 0.9784184 | 0.00379358 | 24.694  |
| gi 52351755 gb AY610185.1       | blue        | 241.51233 | 148.69038 | 0.927329  | 0.02325862 | 1.02    |
| gnl UG Ssc#S17518115            | greenyellow | 241.14295 | 33.764946 | 0.9202984 | 0.02668534 | 37.006  |
| gi 52351253 gb AY609685.1       | skyblue     | 241.07799 | 22.711322 | 0.9652688 | 0.00772925 | 54.752  |
| gi 115550487 dbj AK238752.1     | skyblue     | 241.07651 | 24.135886 | 0.9801255 | 0.00335334 | 63.776  |
| gnl UG Ssc#S17517714            | skyblue     | 240.55153 | 24.187594 | 0.9813228 | 0.00305549 | 21.538  |
| gnl UG Ssc#S23699367            | darkgreen   | 240.54823 | 17.13504  | 0.7275747 | 0.16353449 | 5.42    |
| gnl UG Ssc#S17513449            | salmon      | 240.43208 | 40.781831 | 0.9646199 | 0.00794611 | 329.714 |
| gnl UG Ssc#S18387223            | salmon      | 240.40044 | 42.660824 | 0.9746137 | 0.00483694 | 115.344 |
| gnl UG Ssc#S16769741            | yellow      | 240.04516 | 67.09343  | 0.9816377 | 0.0029787  | 27.324  |
| gi 115551518 dbj AK238982.1     | darkturquoi | 240.02256 | 23.37255  | 0.9309594 | 0.02154968 | 9.798   |
| gnl UG Ssc#S23760326            | salmon      | 239.93366 | 43.188761 | 0.9784162 | 0.00379414 | 10.962  |
| gnl UG Ssc#S18387292            | turquoise   | 239.6648  | 209.05126 | 0.6408152 | 0.24400735 | 37.09   |
| gnl UG Ssc#S31133723            | violet      | 239.62349 | 17.554648 | 0.9244895 | 0.02462429 | 18.198  |
| gnl UG Ssc#S19546091            | purple      | 239.60969 | 57.519263 | 0.9869047 | 0.00179535 | 18.116  |
| gi 115553671 dbj AK239858.1     | purple      | 239.54981 | 49.884826 | 0.9570107 | 0.01063052 | 153.754 |
| gi 115552064 dbj AK239257.1     | grey        | 239.40101 | 10.847503 | 0.7541618 | 0.14080126 | 77.112  |
| gi 194035600 ref XM_001927804.1 | purple      | 239.33114 | 56.185327 | 0.9823168 | 0.00281528 | 124.75  |
| gi 115549210 dbj AK231886.1     | white       | 239.30942 | 17.700061 | -0.123412 | 0.84326655 | 5.972   |
| gnl UG Ssc#S16763478            | greenyellow | 239.26101 | 36.852987 | 0.9512096 | 0.01284195 | 17.756  |
| gi 194034864 ref XM_001929220.1 | brown       | 239.24344 | 85.571451 | 0.9433438 | 0.01605017 | 28.294  |
| gnl UG Ssc#S19544231            | blue        | 238.91778 | 128.66637 | 0.898189  | 0.03839546 | 35.074  |
| gi 160420270 ref NM_001044582.1 | grey60      | 238.64623 | 16.207228 | 0.9634981 | 0.00832558 | 162.178 |
| gnl UG Ssc#S39964958            | pink        | 237.93901 | 19.536503 | -0.88297  | 0.04720706 | 6.454   |
| gnl UG Ssc#S18380485            | greenyellow | 237.92885 | 36.433015 | 0.9452533 | 0.01525007 | 30.016  |
| gi 194034162 ref XM_001925693.1 | brown       | 237.87694 | 63.890199 | 0.8720115 | 0.05389791 | 63.868  |
| gnl UG Ssc#S6072982             | yellowgreer | 237.87314 | 16.591153 | 0.9842793 | 0.00236056 | 10.95   |
|                                 | yellowgreer |           |           |           |            |         |

|                                 |             |           |           |           |            |         |
|---------------------------------|-------------|-----------|-----------|-----------|------------|---------|
| gnl UG Ssc#S23695047            | turquoise   | 237.70394 | 212.71657 | 0.6297607 | 0.25487703 | 25.66   |
| gnl UG Ssc#S17525130            | white       | 237.65502 | 23.263778 | 0.9428077 | 0.01627718 | 16.678  |
| gi 115552269 dbj AK230578.1     | yellow      | 237.58919 | 53.292275 | 0.9233046 | 0.02520154 | 248.638 |
| gnl UG Ssc#S23762445            | red         | 237.28935 | 26.393901 | 0.8937053 | 0.04093103 | 8.198   |
| gi 115550159 dbj AK235638.1     | turquoise   | 237.27879 | 203.90697 | 0.6356133 | 0.24910639 | 4.7     |
| gi 194036460 ref XM_001926279.1 | grey        | 237.22243 | 10.612099 | 0.6607983 | 0.22469072 | 7.002   |
| gi 194039388 ref XM_001929568.1 | darkorange  | 237.12868 | 27.980998 | 0.98031   | 0.00330686 | 48.22   |
| gi 194033869 ref XM_001924394.1 | turquoise   | 237.1005  | 152.59532 | 0.5656496 | 0.32029298 | 11.928  |
| gnl UG Ssc#S23764997            | midnightblu | 236.81574 | 35.90023  | 0.9785613 | 0.00375603 | 26.532  |
| gnl UG Ssc#S29988897            | yellow      | 236.71285 | 59.716193 | 0.9558285 | 0.01107001 | 28.94   |
| gnl UG Ssc#S17511213            | brown       | 236.26793 | 82.849963 | 0.9383047 | 0.01822432 | 17.522  |
| gnl UG Ssc#S40048956            | turquoise   | 236.25628 | 160.46055 | 0.5614175 | 0.32474438 | 34.636  |
| gnl UG Ssc#S40474839            | salmon      | 236.24832 | 41.978265 | 0.9711219 | 0.00586539 | 8.138   |
| gi 52351593 gb AY610023.1       | pink        | 236.21309 | 21.33607  | -0.864967 | 0.0583439  | 223.9   |
| gi 194034692 ref XM_001928709.1 | violet      | 235.89916 | 3.9990079 | 0.2247907 | 0.71621658 | 29.182  |
| gnl UG Ssc#S31115857            | navy        | 235.8032  | 28.67047  | 0.9292762 | 0.02233678 | 9.13    |
| gi 195539469 ref NM_001130733.1 | brown       | 235.76901 | 82.761559 | 0.9375254 | 0.01856849 | 60.17   |
| gi 162139822 ref NM_001111257.1 | salmon      | 235.74884 | 37.622755 | 0.9439951 | 0.01577575 | 71.254  |
| gi 34582610 gb AY368623.1       | salmon      | 235.68116 | 42.007396 | 0.9705966 | 0.00602567 | 656.618 |
| gnl UG Ssc#S18384142            | yellow      | 235.63778 | 44.396117 | 0.8619025 | 0.06031223 | 29.05   |
| gi 194045084 ref XM_001925136.1 | brown       | 235.50506 | 64.923849 | 0.8790068 | 0.04959436 | 10.282  |
| gnl UG Ssc#S18546597            | salmon      | 235.44656 | 39.621386 | 0.9568196 | 0.01070114 | 15.206  |
| gi 115551358 dbj AK236036.1     | blue        | 235.29001 | 146.3628  | 0.9254809 | 0.02414462 | 38.558  |
| gnl UG Ssc#S23694531            | darkorange  | 235.23376 | 27.244215 | 0.9747966 | 0.00478491 | 58.594  |
| gi 115546327 dbj AK230846.1     | grey60      | 235.03728 | 11.216184 | 0.5377857 | 0.34988022 | 7.466   |
| gi 47523683 ref NM_214309.1     | lightcyan   | 235.01418 | 35.870492 | 0.9712437 | 0.00582842 | 22.75   |
| gnl UG Ssc#S6072690             | darkorange  | 234.9686  | 26.55766  | 0.9689712 | 0.00653055 | 21.454  |
| gi 115545600 dbj AK230715.1     | greenyellow | 234.66422 | 36.496813 | 0.9389721 | 0.01793126 | 40.89   |
| gi 115551591 dbj AK239055.1     | turquoise   | 234.64817 | 167.85063 | 0.5807485 | 0.30454048 | 24.988  |
| gi 194474047 ref NM_001130535.1 | turquoise   | 234.62303 | 211.30004 | 0.6305118 | 0.25413443 | 107.038 |
| gnl UG Ssc#S40481511            | darkturquoi | 234.58856 | 18.982255 | 0.8866754 | 0.04500872 | 89.402  |
| gnl UG Ssc#S39946921            | darkorange  | 234.36864 | 27.265859 | 0.9746193 | 0.00483537 | 144.236 |
| gi 47522737 ref NM_213954.1     | purple      | 234.2631  | 57.084858 | 0.9852957 | 0.0021357  | 53.226  |
| gi 115554563 dbj AK236973.1     | darkgreen   | 234.12428 | 20.29658  | 0.8996552 | 0.03757761 | 12.226  |
| gnl UG Ssc#S17510300            | salmon      | 234.11438 | 37.052478 | 0.9415468 | 0.01681519 | 2.75    |
| gnl UG Ssc#S18383725            | purple      | 234.09044 | 52.446175 | 0.9675885 | 0.00697043 | 80.128  |
| gnl UG Ssc#S23755551            | white       | 233.64069 | 24.749553 | 0.9650752 | 0.00779375 | 34.496  |
| gi 115550430 dbj AK238695.1     | darkorange  | 233.5067  | 27.077191 | 0.9734719 | 0.00516605 | 23.65   |
| gi 178057228 ref NM_001123071.1 | midnightblu | 233.49044 | 37.344421 | 0.99153   | 0.00093456 | 89.876  |
| gnl UG Ssc#S18357309            | black       | 233.35214 | 44.021735 | 0.9443549 | 0.01562483 | 12.222  |
| gi 194035836 ref XM_001928869.1 | turquoise   | 233.12667 | 153.7112  | 0.5627361 | 0.32335577 | 83.506  |
| gnl UG Ssc#S17514245            | blue        | 232.85548 | 125.66984 | 0.8936176 | 0.04098115 | 29.406  |
| gnl UG Ssc#S18555414            | purple      | 232.73112 | 57.253071 | 0.9858307 | 0.00202038 | 31.062  |
| gnl UG Ssc#S40055957            | skyblue     | 232.47562 | 26.103426 | 0.9961433 | 0.00028734 | 15.548  |
| gi 47523487 ref NM_214201.1     | black       | 232.41277 | 37.994345 | 0.900313  | 0.03721247 | 72.562  |
| gi 190360658 ref NM_001128471.1 | lightcyan   | 232.39298 | 38.322495 | 0.9861232 | 0.00195821 | 63.19   |
| gnl UG Ssc#S35334259            | darkgreen   | 232.24055 | 21.879869 | 0.8856972 | 0.04558577 | 14.852  |
| gi 115550330 dbj AK238595.1     | purple      | 232.2261  | 53.147749 | 0.9702931 | 0.00611892 | 7.858   |

|                                 |             |           |           |           |            |         |
|---------------------------------|-------------|-----------|-----------|-----------|------------|---------|
| gi 194042805 ref XM_001927802.1 | lightcyan   | 231.76876 | 34.699843 | 0.9637525 | 0.00823903 | 238.802 |
| gi 115548435 dbj AK235052.1     | black       | 231.52665 | 37.923694 | 0.9034858 | 0.03546754 | 5.566   |
| gi 194033747 ref XM_001927557.1 | greenyellow | 231.49674 | 27.540779 | 0.8874351 | 0.04456213 | 12.302  |
| gi 47523095 ref NM_213881.1     | yellow      | 231.48039 | 55.649467 | 0.8937798 | 0.04088849 | 116.116 |
| gnl UG Ssc#S29989765            | yellowgreer | 231.38495 | 16.230123 | 0.9787443 | 0.00370814 | 29.02   |
| gnl UG Ssc#S40488267            | lightgreen  | 231.16241 | 25.086966 | 0.9503781 | 0.01316997 | 13.744  |
| gi 115554002 dbj AK233211.1     | midnightblt | 230.89295 | 36.026894 | 0.9798428 | 0.00342502 | 20.43   |
| gi 115546438 dbj AK230957.1     | midnightblt | 230.76835 | 34.468814 | 0.9698548 | 0.00625441 | 126.71  |
| gi 52351363 gb AY609793.1       | black       | 230.75336 | 44.313505 | 0.9462191 | 0.01485051 | 9.576   |
| gi 194043488 ref XM_001929645.1 | yellowgreer | 230.70055 | 16.17475  | 0.9787867 | 0.0036971  | 13.56   |
| gnl UG Ssc#S16764603            | lightcyan   | 230.52528 | 38.438214 | 0.9854343 | 0.00210562 | 3.942   |
| gnl UG Ssc#S17511222            | lightgreen  | 230.37233 | 23.005757 | 0.9114125 | 0.03122741 | 2.944   |
| gi 55742741 ref NM_213920.1     | red         | 230.19805 | 22.765006 | 0.8514663 | 0.06716615 | 1411.28 |
| gnl UG Ssc#S23701295            | darkgreen   | 229.94375 | 14.331288 | -0.708743 | 0.18021843 | 367.018 |
| gi 47523037 ref NM_214115.1     | skyblue     | 229.8506  | 25.509929 | 0.9911852 | 0.00099215 | 178.788 |
| gnl UG Ssc#S39842527            | yellow      | 229.69441 | 52.472705 | 0.9142968 | 0.02972802 | 0.478   |
| gi 47523579 ref NM_214250.1     | lightyellow | 229.42193 | 15.020734 | 0.8032837 | 0.1015887  | 61.3    |
| gi 113205649 ref NM_001044550.1 | greenyellow | 229.25863 | 36.864607 | 0.9404739 | 0.01727742 | 74.694  |
| gnl UG Ssc#S18295298            | yellow      | 229.20156 | 69.495577 | 0.9806051 | 0.00323295 | 11.786  |
| gi 194042303 ref XM_001928772.1 | midnightblt | 229.12843 | 32.957713 | 0.9611318 | 0.00914488 | 148.574 |
| gnl UG Ssc#S40047900            | purple      | 229.10104 | 53.693233 | 0.9727761 | 0.00537005 | 15.518  |
| gi 194044593 ref XM_001929063.1 | purple      | 229.08227 | 53.913518 | 0.9733697 | 0.00519583 | 41.988  |
| gi 115552216 dbj AK230525.1     | darkgreen   | 228.92069 | 20.31872  | 0.7846484 | 0.11601236 | 24.368  |
| gnl UG Ssc#S23695151            | lightcyan   | 228.66852 | 39.493747 | 0.9928874 | 0.00071931 | 8.83    |
| gi 194038900 ref XM_001925133.1 | yellowgreer | 228.57279 | 13.800443 | 0.9451445 | 0.01529531 | 37.584  |
| gnl UG Ssc#S19540267            | magenta     | 228.40646 | 14.364346 | -0.099681 | 0.87329209 | 29.118  |
| gi 115550429 dbj AK238694.1     | darkturquoi | 228.39698 | 25.494044 | 0.9547726 | 0.01146749 | 16.29   |
| gi 115547607 dbj AK231265.1     | darkgreen   | 228.17424 | 18.491962 | 0.7762196 | 0.1227222  | 14.864  |
| gi 115550750 dbj AK235824.1     | salmon      | 227.97537 | 37.534515 | 0.9444055 | 0.01560366 | 9.588   |
| gnl UG Ssc#S23769110            | brown       | 227.87265 | 72.741524 | 0.908419  | 0.03280832 | 34.34   |
| gnl UG Ssc#S26650236            | turquoise   | 227.75958 | 161.3504  | 0.565477  | 0.3204742  | 13.908  |
| gnl UG Ssc#S18553314            | lightcyan   | 227.74319 | 37.417058 | 0.9806933 | 0.00321094 | 5.26    |
| gnl UG Ssc#S40053418            | pink        | 227.67516 | 9.3118445 | 0.5036981 | 0.38692957 | 110.146 |
| gnl UG Ssc#S23772025            | blue        | 227.67276 | 123.64605 | 0.889757  | 0.04320612 | 6.118   |
| gnl UG Ssc#S19541855            | brown       | 227.67165 | 74.43966  | 0.9097349 | 0.0321103  | 32.296  |
| gi 52351640 gb AY610070.1       | skyblue     | 227.64763 | 24.493153 | 0.9850703 | 0.00218492 | 9.946   |
| gi 115554762 dbj AK233574.1     | pink        | 227.44943 | 21.789935 | -0.837511 | 0.07668168 | 88.734  |
| gnl UG Ssc#S26396016            | paleturquoi | 227.39388 | 8.2739621 | 0.8025195 | 0.10216868 | 6.796   |
| gnl UG Ssc#S34500909            | grey60      | 227.20312 | 15.232286 | 0.6256575 | 0.25894387 | 21.992  |
| gnl UG Ssc#S18379831            | white       | 226.74431 | 24.22697  | 0.9613631 | 0.00906368 | 4.638   |
| gnl UG Ssc#S40042784            | skyblue     | 226.73567 | 26.105703 | 0.9953665 | 0.00037835 | 29.964  |
| gnl UG Ssc#S18546970            | lightcyan   | 226.72903 | 38.80461  | 0.9875156 | 0.00167136 | 4.66    |
| gnl UG Ssc#S40475805            | skyblue     | 226.66041 | 26.175207 | 0.9962822 | 0.00027197 | 132.38  |
| gi 194041160 ref XM_001927391.1 | lightcyan   | 226.55148 | 39.501877 | 0.9926583 | 0.00075431 | 12.806  |
| gnl UG Ssc#S17510736            | blue        | 226.54313 | 127.58393 | 0.894208  | 0.04064419 | 20.676  |
| gi 194036282 ref XM_001924669.1 | blue        | 226.51036 | 131.96097 | 0.9012249 | 0.03670823 | 10.624  |
| gi 115551063 dbj AK238924.1     | brown       | 226.45316 | 58.071153 | 0.8488947 | 0.06889007 | 27.128  |
| gnl UG Ssc#S40024674            | brown       | 226.3351  | 78.215642 | 0.9252686 | 0.02424707 | 16.618  |

|                                 |             |           |           |           |            |         |
|---------------------------------|-------------|-----------|-----------|-----------|------------|---------|
| gi 47523015 ref NM_214103.1     | pink        | 226.28842 | 17.760975 | -0.857552 | 0.06314146 | 189.864 |
| gnl UG Ssc#S6029610             | brown       | 226.26897 | 59.173125 | 0.853514  | 0.06580327 | 27.846  |
| gi 194040969 ref XM_001924529.1 | yellow      | 226.25413 | 70.256954 | 0.9916173 | 0.00092016 | 85.216  |
| gnl UG Ssc#S16763114            | midnightblt | 226.19841 | 34.081494 | 0.9713288 | 0.00580264 | 4.076   |
| gnl UG Ssc#S39839709            | darkgreen   | 226.18058 | 21.044507 | 0.9220386 | 0.0258231  | 9.414   |
| gnl UG Ssc#S19545362            | brown       | 226.15834 | 77.396244 | 0.9244335 | 0.02465149 | 35.916  |
| gnl UG Ssc#S19545017            | magenta     | 226.01132 | 15.492028 | -0.134027 | 0.82986331 | 26.996  |
| gi 153792048 ref NM_001099934.1 | lightcyan   | 225.81439 | 38.001446 | 0.9848166 | 0.00224077 | 144.416 |
| gi 194039486 ref XM_001927002.1 | pink        | 225.66185 | 22.750263 | -0.888217 | 0.04410397 | 98.452  |
| gi 164664451 ref NM_001113442.1 | darkgreen   | 225.61321 | 10.572344 | 0.7113491 | 0.17788219 | 40.522  |
| gi 115550482 dbj AK238747.1     | grey60      | 225.55284 | 14.800622 | 0.8453167 | 0.07131099 | 5.7     |
| gi 115548388 dbj AK235005.1     | turquoise   | 225.50689 | 139.08379 | 0.5304346 | 0.35779313 | 126.084 |
| gi 194042190 ref XM_001924717.1 | skyblue     | 225.18353 | 25.09574  | 0.9906843 | 0.00107783 | 124.124 |
| gi 194042305 ref XM_001928810.1 | blue        | 225.12566 | 115.52803 | 0.8680072 | 0.05641155 | 78.604  |
| gnl UG Ssc#S19542017            | grey60      | 225.07239 | 11.001504 | 0.4815467 | 0.41147307 | 50.816  |
| gnl UG Ssc#S40340051            | skyblue     | 224.9483  | 26.295099 | 0.9988809 | 4.49E-05   | 27.736  |
| gnl UG Ssc#S27602037            | purple      | 224.93373 | 55.008099 | 0.9774393 | 0.00405404 | 18.256  |
| gi 47523779 ref NM_214361.1     | yellow      | 224.89747 | 38.404168 | 0.7764818 | 0.12251183 | 98.056  |
| gi 194038777 ref XM_001928268.1 | magenta     | 224.56574 | 15.322783 | -0.149792 | 0.80999409 | 62.916  |
| gi 52351547 gb AY609977.1       | skyblue     | 224.56399 | 26.036468 | 0.9953523 | 0.0003801  | 50.076  |
| gi 194045072 ref XM_001927451.1 | skyblue     | 224.29669 | 25.88705  | 0.9957563 | 0.00033165 | 12.064  |
| gnl UG Ssc#S40588301            | skyblue     | 224.26501 | 25.541446 | 0.9933949 | 0.00064376 | 242.774 |
| gi 194043830 ref XM_001925246.1 | royalblue   | 224.13933 | 19.441364 | 0.9477526 | 0.01422322 | 8.896   |
| gnl UG Ssc#S18387444            | blue        | 224.05379 | 129.33402 | 0.8945101 | 0.04047214 | 2.204   |
| gi 115551001 dbj AK238862.1     | salmon      | 224.04064 | 41.031813 | 0.9651412 | 0.00777173 | 524.732 |
| gnl UG Ssc#S40388648            | blue        | 223.8883  | 102.54621 | 0.8427415 | 0.07306941 | 24.338  |
| gi 115555150 dbj AK233765.1     | grey60      | 223.86364 | 12.388829 | 0.6142776 | 0.27031247 | 75.198  |
| gnl UG Ssc#S18357319            | yellow      | 223.79637 | 64.581639 | 0.9609709 | 0.00920146 | 22.716  |
| gi 47522641 ref NM_213922.1     | black       | 223.54268 | 31.268795 | 0.8509098 | 0.06753808 | 29.578  |
| gi 194038687 ref XM_001928174.1 | lightcyan   | 223.32501 | 37.948637 | 0.9831997 | 0.00260743 | 52.494  |
| gi 194042161 ref XM_001925705.1 | midnightblt | 223.19412 | 34.640465 | 0.9719405 | 0.00561846 | 29.772  |
| gi 158262676 ref NM_001109945.1 | purple      | 223.18718 | 52.03848  | 0.9658701 | 0.00753009 | 10.514  |
| gi 115550185 dbj AK235664.1     | greenyellow | 223.17647 | 36.058899 | 0.9368423 | 0.0188719  | 15.482  |
| gnl UG Ssc#S34533088            | midnightblt | 223.13007 | 35.698637 | 0.9797959 | 0.00343694 | 18.182  |
| gnl UG Ssc#S40546869            | purple      | 223.02802 | 54.183036 | 0.9741961 | 0.00495648 | 14.49   |
| gnl UG Ssc#S40474257            | salmon      | 222.97942 | 37.729968 | 0.9452638 | 0.01524569 | 26.662  |
| gnl UG Ssc#S19541687            | blue        | 222.7302  | 124.20787 | 0.8880213 | 0.04421852 | 4.536   |
| gi 115551776 dbj AK236182.1     | greenyellow | 222.64511 | 35.579972 | 0.9308855 | 0.02158408 | 49.798  |
| gi 148225749 ref NM_001097504.1 | pink        | 222.59495 | 20.083503 | -0.894483 | 0.04048768 | 39.36   |
| gi 72535177 ref NM_001031781.1  | lightcyan   | 222.56291 | 40.141247 | 0.9966693 | 0.00023063 | 295.422 |
| gi 194044032 ref XM_001928774.1 | blue        | 222.54359 | 111.55582 | 0.8594334 | 0.06191295 | 41.974  |
| gnl UG Ssc#S35324845            | black       | 222.51372 | 40.518745 | 0.9213292 | 0.0261735  | 4.24    |
| gnl UG Ssc#S31116354            | black       | 222.46999 | 24.780278 | 0.8055519 | 0.09987306 | 8.24    |
| gnl UG Ssc#S23762759            | blue        | 222.45081 | 121.84161 | 0.8827429 | 0.04734269 | 10.584  |
| gnl UG Ssc#S40437350            | brown       | 222.36777 | 74.061018 | 0.9145291 | 0.02960829 | 37.078  |
| gi 194044171 ref XM_001924505.1 | blue        | 222.10971 | 123.24096 | 0.8863236 | 0.04521597 | 5.26    |
| gnl UG Ssc#S20947929            | blue        | 222.0802  | 134.23321 | 0.9054769 | 0.0343863  | 12.38   |
| gi 115547083 dbj AK231138.1     | darkgreen   | 222.0331  | 21.17857  | 0.8236255 | 0.08652678 | 9.454   |

|                                 |             |           |           |           |            |         |
|---------------------------------|-------------|-----------|-----------|-----------|------------|---------|
| gi 124558111 gb EF154832.1      | darkgreen   | 222.01314 | 17.05444  | -0.571675 | 0.31398196 | 19.596  |
| gi 194036941 ref XM_001925986.1 | black       | 221.86989 | 25.217015 | 0.8213099 | 0.08820379 | 20.184  |
| gi 47522761 ref NM_213967.1     | turquoise   | 221.63115 | 156.77325 | 0.5528045 | 0.33385124 | 56.18   |
| gi 194042690 ref XM_001929322.1 | purple      | 221.60052 | 50.704255 | 0.9610715 | 0.00916608 | 90.348  |
| gnl UG Ssc#S40439319            | magenta     | 221.5825  | 17.158865 | 0.016975  | 0.97838779 | 40.462  |
| gi 194036601 ref XM_001929330.1 | blue        | 221.56051 | 95.090176 | 0.8223959 | 0.08741608 | 23.556  |
| gnl UG Ssc#S26645293            | brown       | 221.54622 | 66.529496 | 0.8835596 | 0.04685487 | 15.018  |
| gi 52352037 gb AY610453.1       | pink        | 221.25246 | 22.125412 | -0.903763 | 0.03531655 | 11.056  |
| gi 115554075 dbj AK233284.1     | magenta     | 221.01384 | 16.863307 | -0.002834 | 0.99639226 | 163.734 |
| gi 115553764 dbj AK236768.1     | midnightblt | 221.0063  | 31.012537 | 0.9409738 | 0.01706155 | 10.992  |
| gnl UG Ssc#S38482319            | darkgreen   | 220.68619 | 17.390531 | -0.569116 | 0.31665892 | 84.834  |
| gnl UG Ssc#S19542228            | darkgreen   | 220.55558 | 17.660442 | -0.532754 | 0.35529212 | 17.818  |
| gnl UG Ssc#S40267793            | purple      | 220.52183 | 53.298655 | 0.9706597 | 0.00600635 | 23.262  |
| gi 115547172 dbj AK231227.1     | skyblue     | 220.4677  | 24.31972  | 0.9834466 | 0.00255024 | 6.976   |
| gnl UG Ssc#S23698716            | yellow      | 220.36027 | 61.79062  | 0.9370287 | 0.01878895 | 60.822  |
| gi 47523675 ref NM_214305.1     | skyblue3    | 220.05333 | 13.896208 | 0.9442778 | 0.01565715 | 2.524   |
| gnl UG Ssc#S23775557            | turquoise   | 219.91947 | 172.88967 | 0.5914843 | 0.29346534 | 37.858  |
| gi 194040778 ref XM_001927213.1 | purple      | 219.89157 | 50.40656  | 0.9593422 | 0.009781   | 31.056  |
| gnl UG Ssc#S18553358            | lightcyan   | 219.65252 | 38.080718 | 0.984273  | 0.00236198 | 31.804  |
| gi 115545780 dbj AK234213.1     | blue        | 219.64993 | 115.94653 | 0.8742029 | 0.05253761 | 25.396  |
| gi 194043363 ref XM_001929468.1 | yellowgreer | 219.61747 | 12.346419 | 0.9233945 | 0.02515764 | 26.3    |
| gnl UG Ssc#S40512983            | brown       | 219.18994 | 79.831368 | 0.9280471 | 0.02291726 | 5.672   |
| gnl UG Ssc#S19542616            | royalblue   | 219.17056 | 18.276683 | 0.9163928 | 0.02865343 | 11.226  |
| gi 115548831 dbj AK231946.1     | salmon      | 219.10327 | 36.311308 | 0.9381162 | 0.01830741 | 116.178 |
| gnl UG Ssc#S6006110             | midnightblt | 219.07128 | 34.357368 | 0.9698136 | 0.00626722 | 9.552   |
| gi 52350686 gb AY609402.1       | brown       | 218.88498 | 66.573911 | 0.888829  | 0.04374651 | 8.816   |
| gi 194042129 ref XM_001927395.1 | midnightblt | 218.85286 | 27.942688 | 0.9169555 | 0.02836712 | 25.698  |
| gi 115550394 dbj AK238659.1     | yellow      | 218.80918 | 66.28948  | 0.9564089 | 0.01085352 | 66.9    |
| gnl UG Ssc#S35333016            | purple      | 218.55074 | 49.185244 | 0.9542753 | 0.01165625 | 14.618  |
| gi 115547436 dbj AK237818.1     | lightgreen  | 218.51186 | 24.788573 | 0.9469364 | 0.01455598 | 41.67   |
| gnl UG Ssc#S40048435            | darkgreen   | 218.47481 | 17.259606 | -0.51414  | 0.37548473 | 82.974  |
| gnl UG Ssc#S16767076            | yellow      | 218.40693 | 65.199096 | 0.9621638 | 0.00878445 | 121.18  |
| gnl UG Ssc#S18353806            | green       | 218.23242 | 37.338313 | 0.8024918 | 0.10218972 | 28.66   |
| gi 194035708 ref XM_001927062.1 | blue        | 218.17162 | 115.09374 | 0.868023  | 0.05640161 | 27.838  |
| gnl UG Ssc#S38481167            | tan         | 218.12844 | 35.531746 | 0.9361239 | 0.01919271 | 6.422   |
| gi 115552842 dbj AK239436.1     | yellow      | 218.03565 | 57.067655 | 0.9094995 | 0.03223484 | 296.484 |
| gnl UG Ssc#S31134161            | brown       | 217.8926  | 78.956329 | 0.9246652 | 0.02453907 | 2.96    |
| gi 194041609 ref XM_001928028.1 | grey60      | 217.89225 | 14.75997  | 0.625296  | 0.25930303 | 72.568  |
| gi 115547025 dbj AK231080.1     | grey60      | 217.83924 | 13.620692 | 0.7895086 | 0.11219521 | 12.88   |
| gi 212549622 ref NM_001137629.1 | grey60      | 217.65473 | 12.7242   | 0.7106151 | 0.17853941 | 20.636  |
| gnl UG Ssc#S19542661            | lightyellow | 217.51633 | 19.687218 | 0.8748916 | 0.05211241 | 2.414   |
| gnl UG Ssc#S26711201            | yellow      | 217.1941  | 62.879997 | 0.9692547 | 0.00644152 | 11.752  |
| gnl UG Ssc#S31102082            | lightcyan   | 216.96205 | 38.818198 | 0.9902266 | 0.00115814 | 3.294   |
| gi 47523093 ref NM_213884.1     | skyblue3    | 216.83039 | 16.625782 | 0.9853377 | 0.00212657 | 136.68  |
| gi 194034148 ref XM_001924679.1 | turquoise   | 216.82007 | 191.80806 | 0.6105358 | 0.27407877 | 31.71   |
| gnl UG Ssc#S18378493            | lightcyan   | 216.55522 | 40.439717 | 0.9989379 | 4.15E-05   | 15.348  |
| gnl UG Ssc#S6060797             | skyblue     | 216.44116 | 23.513338 | 0.9766736 | 0.00426168 | 8.534   |
| gnl UG Ssc#S29983177            | salmon      | 216.39846 | 35.007681 | 0.9292233 | 0.02236166 | 10.594  |

|                                 |             |           |           |           |            |         |
|---------------------------------|-------------|-----------|-----------|-----------|------------|---------|
| gnl UG Ssc#S35322082            | purple      | 216.34901 | 52.509224 | 0.9674928 | 0.00700122 | 6.478   |
| gi 194035716 ref XM_001925987.1 | yellow      | 216.05819 | 33.410085 | 0.7313125 | 0.16027903 | 30.74   |
| gi 91176934 gb DQ450676.1       | grey60      | 215.7268  | 15.234234 | 0.7808815 | 0.11899707 | 8.406   |
| gi 115548797 dbj AK231755.1     | midnightblt | 215.64212 | 30.17722  | 0.9402057 | 0.01739361 | 69.638  |
| gnl UG Ssc#S20451601            | sienna3     | 215.51627 | 17.190338 | 0.9725013 | 0.00545133 | 2.878   |
| gi 194041329 ref XM_001928735.1 | darkorange  | 215.4305  | 22.188296 | 0.9327027 | 0.02074423 | 9.702   |
| gnl UG Ssc#S18378075            | skyblue     | 215.40514 | 25.901807 | 0.9929627 | 0.00070792 | 8.196   |
| gnl UG Ssc#S23700711            | yellowgreer | 215.32949 | 12.268839 | 0.9209126 | 0.02638    | 5.498   |
| gnl UG Ssc#S40131124            | black       | 215.24829 | 37.245398 | 0.8974046 | 0.03883533 | 4.616   |
| gi 52351209 gb AY609612.1       | darkmagent  | 215.08052 | 9.6638255 | 0.8747363 | 0.05220817 | 63.672  |
| gnl UG Ssc#S17517405            | turquoise   | 215.03368 | 178.02878 | 0.5930638 | 0.29184497 | 15.13   |
| gnl UG Ssc#S39967395            | skyblue     | 214.88552 | 24.080009 | 0.9760316 | 0.00443838 | 8.616   |
| gnl UG Ssc#S39789448            | orange      | 214.83855 | 11.941308 | 0.9071413 | 0.03349068 | 38.92   |
| gnl UG Ssc#S35329254            | greenyellow | 214.83402 | 27.055921 | 0.8757674 | 0.05157323 | 28.768  |
| gi 194041219 ref XM_001928126.1 | greenyellow | 214.7395  | 24.325049 | 0.8562835 | 0.06397388 | 19.292  |
| gnl UG Ssc#S40284317            | lightcyan   | 214.73294 | 40.289546 | 0.997605  | 0.00014065 | 0.118   |
| gnl UG Ssc#S18546426            | grey        | 214.4075  | 12.207038 | 0.7552114 | 0.13992443 | 88.608  |
| gi 115548526 dbj AK235143.1     | yellow      | 214.25152 | 59.129019 | 0.9267759 | 0.02352265 | 107.132 |
| gi 194033755 ref XM_001924851.1 | red         | 213.97459 | 32.743298 | 0.9753179 | 0.00463759 | 35.328  |
| gi 194044925 ref XM_001927734.1 | midnightblt | 213.96777 | 32.40235  | 0.9605149 | 0.00936255 | 142.472 |
| gnl UG Ssc#S38481028            | grey60      | 213.86124 | 16.616266 | 0.7798992 | 0.11977915 | 27.386  |
| gnl UG Ssc#S40038955            | yellow      | 213.70836 | 66.199463 | 0.9559667 | 0.01101836 | 398.304 |
| gnl UG Ssc#S23770901            | skyblue3    | 213.69098 | 15.881986 | 0.9747937 | 0.00478573 | 10.488  |
| gnl UG Ssc#S40335680            | violet      | 213.51599 | 12.559664 | 0.8797903 | 0.04911939 | 5.754   |
| gnl UG Ssc#S23696828            | tan         | 213.47619 | 42.202562 | 0.9761185 | 0.00441432 | 64.982  |
| gi 115548520 dbj AK235137.1     | darkturquoi | 213.38398 | 22.566994 | 0.9301    | 0.02195044 | 250.98  |
| gnl UG Ssc#S17526093            | midnightblt | 213.35421 | 29.844539 | 0.9418791 | 0.01667285 | 33.602  |
| gi 52350683 gb AY609399.1       | orange      | 213.32319 | 12.360884 | 0.9265268 | 0.02364188 | 127.218 |
| gi 47522727 ref NM_213949.1     | pink        | 213.15771 | 20.785219 | 0.8040558 | 0.1010037  | 26.792  |
| gi 52351260 gb AY609692.1       | sienna3     | 213.12767 | 17.136565 | 0.9722608 | 0.00552281 | 50.184  |
| gnl UG Ssc#S18546943            | darkgreen   | 213.07128 | 21.168535 | 0.8537485 | 0.06564775 | 19.69   |
| gi 194041401 ref XM_001926294.1 | orange      | 212.85638 | 11.909594 | 0.9025397 | 0.03598506 | 4.182   |
| gi 47523561 ref NM_214245.1     | lightgreen  | 212.6852  | 26.58032  | 0.9673403 | 0.0070504  | 40.534  |
| gnl UG Ssc#S40143544            | turquoise   | 212.58371 | 162.51958 | 0.5732321 | 0.31235686 | 16.048  |
| gnl UG Ssc#S35327311            | navy        | 212.56704 | 32.496128 | 0.9604041 | 0.00940182 | 18.12   |
| gnl UG Ssc#S17512305            | blue        | 212.48255 | 106.88438 | 0.8528278 | 0.066259   | 5.46    |
| gnl UG Ssc#S23760463            | grey60      | 212.47033 | 15.369399 | 0.7681662 | 0.1292373  | 89.456  |
| gnl UG Ssc#S6058884             | tan         | 212.40716 | 39.307511 | 0.9587424 | 0.00999732 | 32.558  |
| gnl UG Ssc#S17517004            | turquoise   | 212.36436 | 149.62794 | 0.5520988 | 0.33460015 | 9.38    |
| gnl UG Ssc#S29463694            | orange      | 212.35239 | 12.691157 | 0.9426173 | 0.01635805 | 8.028   |
| gnl UG Ssc#S23768000            | darkturquoi | 212.33748 | 21.181261 | 0.9197376 | 0.02696516 | 7.388   |
| gnl UG Ssc#S18279395            | skyblue3    | 212.30336 | 16.139224 | 0.9807764 | 0.00319028 | 24.734  |
| gnl UG Ssc#S17526150            | lightgreen  | 212.23991 | 22.395802 | 0.9054484 | 0.03440168 | 6.372   |
| gnl UG Ssc#S39780074            | tan         | 212.19651 | 37.051687 | 0.9452696 | 0.0152433  | 9.368   |
| gnl UG Ssc#S17525753            | yellow      | 211.94943 | 43.893743 | 0.8157223 | 0.09229085 | 77.304  |
| gi 115550476 dbj AK238741.1     | tan         | 211.72924 | 43.068956 | 0.9796806 | 0.00346635 | 27.95   |
| gnl UG Ssc#S31122306            | darkgreen   | 211.604   | 18.206692 | -0.494607 | 0.39695998 | 201.19  |
| gnl UG Ssc#S16769072            | darkturquoi | 211.56688 | 23.966427 | 0.9433679 | 0.01604    | 9       |

|                                 |             |           |           |           |            |         |
|---------------------------------|-------------|-----------|-----------|-----------|------------|---------|
| gi 194042016 ref XM_001926579.1 | midnightblu | 211.50782 | 30.679303 | 0.9480047 | 0.01412092 | 229.296 |
| gi 147906088 ref NM_213946.2    | purple      | 211.02178 | 48.903585 | 0.9528452 | 0.01220468 | 41.384  |
| gnl UG Ssc#S31124728            | darkgreen   | 210.96159 | 17.865819 | -0.436617 | 0.4622884  | 45.374  |
| gnl UG Ssc#S18550190            | lightgreen  | 210.9141  | 27.060307 | 0.9673285 | 0.0070542  | 21.236  |
| gnl UG Ssc#S6081209             | darkgreen   | 210.88564 | 18.105287 | -0.433132 | 0.46628313 | 38.842  |
| gi 194040263 ref XM_001927880.1 | darkgreen   | 210.85657 | 18.108037 | -0.446917 | 0.45052246 | 26.906  |
| gnl UG Ssc#S31133725            | pink        | 210.76765 | 19.923857 | -0.978124 | 0.00387139 | 7.626   |
| gnl UG Ssc#S18292679            | turquoise   | 210.53778 | 121.50356 | 0.5017523 | 0.38907111 | 3.694   |
| gnl UG Ssc#S40543017            | darkgrey    | 210.49903 | 14.73084  | 0.9325402 | 0.02081888 | 6.794   |
| gnl UG Ssc#S40505966            | tan         | 210.49838 | 42.383066 | 0.9762962 | 0.00436526 | 63.578  |
| gnl UG Ssc#S40193201            | turquoise   | 210.42804 | 164.48145 | 0.594459  | 0.29041557 | 17.674  |
| gnl UG Ssc#S40047541            | yellow      | 210.35614 | 63.795613 | 0.9488269 | 0.01378904 | 10.68   |
| gnl UG Ssc#S29977753            | yellow      | 210.34917 | 60.455075 | 0.9588044 | 0.0099749  | 7.738   |
| gi 194037705 ref XM_001924362.1 | sienna3     | 210.17805 | 18.246097 | 0.985764  | 0.00203463 | 63.574  |
| gi 115550923 dbj AK238784.1     | turquoise   | 210.07479 | 167.87936 | 0.5787176 | 0.30664738 | 7.36    |
| gi 194035657 ref XM_001928441.1 | tan         | 210.00827 | 43.371528 | 0.982379  | 0.00280045 | 118.834 |
| gnl UG Ssc#S39794612            | grey60      | 209.9675  | 14.630638 | 0.6934212 | 0.19412919 | 15.626  |
| gi 194041319 ref XM_001928397.1 | midnightblu | 209.94169 | 29.783316 | 0.9385381 | 0.01812168 | 28.882  |
| gi 52351090 gb AY609495.1       | turquoise   | 209.86342 | 149.94436 | 0.5508475 | 0.33592919 | 398.6   |
| gnl UG Ssc#S18549601            | navy        | 209.8469  | 31.901366 | 0.964178  | 0.00809489 | 34.396  |
| gi 194035679 ref XM_001925389.1 | darkgreen   | 209.82891 | 17.390396 | -0.545292 | 0.34184543 | 493.61  |
| gnl UG Ssc#S16513514            | sienna3     | 209.82038 | 16.307755 | 0.9622427 | 0.00875711 | 11.962  |
| gnl UG Ssc#S18383636            | tan         | 209.81466 | 41.588192 | 0.9702659 | 0.0061273  | 27.528  |
| gnl UG Ssc#S26715223            | darkgreen   | 209.46668 | 18.473886 | -0.440244 | 0.45813689 | 46.936  |
| gi 115546889 dbj AK237735.1     | skyblue     | 209.45584 | 24.844737 | 0.9847017 | 0.0022662  | 13.428  |
| gi 194034226 ref XM_001928937.1 | yellow      | 209.22273 | 64.805423 | 0.9550553 | 0.01136061 | 157.192 |
| gnl UG Ssc#S39993494            | purple      | 209.10182 | 48.867337 | 0.9530586 | 0.01212233 | 46.732  |
| gnl UG Ssc#S41578369            | skyblue3    | 209.05859 | 15.669483 | 0.9708445 | 0.00594985 | 7.756   |
| gi 117661185 gb DQ629176.1      | yellow      | 209.03344 | 52.721908 | 0.9057008 | 0.03426538 | 160.946 |
| gi 115554610 dbj AK237020.1     | tan         | 209.0136  | 45.448705 | 0.9915959 | 0.00092369 | 54.518  |
| gi 115554415 dbj AK233425.1     | orange      | 208.98299 | 12.968052 | 0.9543776 | 0.01161734 | 41.58   |
| gi 194041234 ref XM_001925415.1 | greenyellow | 208.9052  | 31.257261 | 0.9034927 | 0.03546378 | 32.552  |
| gi 194034703 ref XM_001926714.1 | red         | 208.90452 | 25.568677 | 0.8481419 | 0.06939726 | 15.14   |
| gnl UG Ssc#S39955157            | violet      | 208.90359 | 11.444759 | -0.989495 | 0.00129047 | 18.36   |
| gnl UG Ssc#S5995726             | skyblue3    | 208.90047 | 16.985203 | 0.9894156 | 0.00130509 | 14.254  |
| gnl UG Ssc#S23695164            | salmon      | 208.63455 | 33.019057 | 0.9170195 | 0.02833458 | 211.696 |
| gnl UG Ssc#S40049940            | orange      | 208.63172 | 13.112802 | 0.9302632 | 0.02187416 | 18.276  |
| gi 115550671 dbj AK232501.1     | tan         | 208.48966 | 40.752778 | 0.9651002 | 0.00778541 | 47.74   |
| gi 194034274 ref XM_001924792.1 | lightcyan   | 208.23787 | 37.47358  | 0.9814126 | 0.00303353 | 16.146  |
| gnl UG Ssc#S40292473            | pink        | 208.19919 | 22.469369 | 0.9402138 | 0.0173901  | 12.12   |
| gi 115551791 dbj AK236197.1     | skyblue3    | 208.17978 | 14.172236 | 0.9518147 | 0.01260497 | 42.354  |
| gnl UG Ssc#S26711650            | purple      | 207.91076 | 49.507759 | 0.9552037 | 0.01130464 | 59.554  |
| gnl UG Ssc#S5999899             | magenta     | 207.84474 | 28.740598 | 0.9509063 | 0.01296127 | 18.14   |
| gnl UG Ssc#S40440480            | darkgreen   | 207.79721 | 17.099502 | -0.548348 | 0.33858836 | 290.866 |
| gnl UG Ssc#S19542525            | darkgrey    | 207.69376 | 15.872916 | 0.9802263 | 0.00332793 | 80.286  |
| gi 61696637 gb AY803100.1       | brown       | 207.5662  | 68.544424 | 0.8928915 | 0.04139673 | 6.514   |
| gnl UG Ssc#S17525225            | salmon      | 207.43738 | 35.164795 | 0.9347629 | 0.0198052  | 14.372  |
| gi 52352717 gb AY609637.1       | skyblue3    | 207.42689 | 17.299355 | 0.993814  | 0.00058351 | 30.796  |

|                                 |             |           |           |           |            |         |
|---------------------------------|-------------|-----------|-----------|-----------|------------|---------|
| gnl UG Ssc#S34524196            | orange      | 207.36738 | 12.389156 | 0.9405707 | 0.01723552 | 13.162  |
| gnl UG Ssc#S23755238            | skyblue     | 207.25626 | 23.888928 | 0.9765111 | 0.00430617 | 9.062   |
| gi 115548882 dbj AK235285.1     | grey60      | 207.20396 | 15.968834 | 0.7367815 | 0.15555029 | 81.272  |
| gi 115546656 dbj AK234494.1     | magenta     | 207.12454 | 12.197508 | 0.6524616 | 0.23269635 | 36.934  |
| gi 48976064 ref NM_001001649.2  | greenyellow | 207.0383  | 31.455977 | 0.9026612 | 0.03591847 | 221.056 |
| gnl UG Ssc#S26724539            | turquoise   | 207.01468 | 117.10631 | 0.4989375 | 0.39217423 | 15.076  |
| gnl UG Ssc#S39778806            | greenyellow | 207.01046 | 29.063212 | 0.9001174 | 0.03732095 | 64.268  |
| gnl UG Ssc#S18356252            | yellow      | 206.75322 | 61.089012 | 0.9265001 | 0.02365467 | 10.054  |
| gi 47523261 ref NM_213791.1     | sienna3     | 206.66434 | 19.078786 | 0.994954  | 0.00042996 | 12.962  |
| gnl UG Ssc#S20946380            | violet      | 206.57687 | 13.280049 | 0.905675  | 0.03427932 | 13.862  |
| gnl UG Ssc#S40426329            | tan         | 206.52632 | 45.928323 | 0.9948218 | 0.00044696 | 34.966  |
| gnl UG Ssc#S34513996            | navy        | 206.42552 | 37.230495 | 0.9329747 | 0.02061946 | 22.128  |
| gi 52351167 gb AY609572.1       | blue        | 206.39945 | 103.08517 | 0.841988  | 0.07358644 | 99.686  |
| gnl UG Ssc#S6076838             | grey60      | 206.26575 | 16.336653 | 0.7805467 | 0.11926344 | 19.376  |
| gi 194041162 ref XM_001927505.1 | skyblue     | 206.21159 | 23.705734 | 0.9757137 | 0.00452677 | 39.758  |
| gi 194040341 ref XM_001928820.1 | blue        | 206.12496 | 94.207236 | 0.8264621 | 0.08448594 | 53.054  |
| gnl UG Ssc#S18379693            | skyblue3    | 206.09889 | 17.113944 | 0.9915449 | 0.00093209 | 18.808  |
| gi 194038585 ref XM_001926711.1 | skyblue3    | 206.07496 | 17.521989 | 0.997176  | 0.00018007 | 494.478 |
| gnl UG Ssc#S17515842            | darkgreen   | 205.82199 | 8.5537272 | 0.7143911 | 0.17516597 | 23.418  |
| gnl UG Ssc#S39793738            | lightcyan   | 205.77127 | 38.906103 | 0.9908095 | 0.0010562  | 6.218   |
| gi 115553038 dbj AK239624.1     | blue        | 205.72091 | 106.98222 | 0.8530351 | 0.06612125 | 245.668 |
| gi 115554899 dbj AK233711.1     | skyblue3    | 205.59007 | 15.962353 | 0.9751186 | 0.00469375 | 87.406  |
| gnl UG Ssc#S18387794            | black       | 205.57056 | 20.544142 | 0.7733049 | 0.12506859 | 55.656  |
| gnl UG Ssc#S6059254             | darkgreen   | 205.43414 | 18.702867 | 0.9430281 | 0.01618372 | 29.956  |
| gi 115555249 dbj AK233864.1     | blue        | 205.38323 | 109.13056 | 0.8558838 | 0.0642369  | 26.752  |
| gi 194039316 ref XM_001929265.1 | pink        | 205.2339  | 20.75015  | 0.8293954 | 0.08239135 | 73.968  |
| gnl UG Ssc#S31115826            | lightcyan   | 205.2275  | 33.661142 | 0.9517664 | 0.01262382 | 4.264   |
| gi 194044951 ref XM_001925471.1 | tan         | 205.19331 | 39.755939 | 0.9585347 | 0.01007258 | 47.902  |
| gnl UG Ssc#S17517303            | greenyellow | 205.14307 | 22.59117  | 0.8358115 | 0.07786676 | 2.396   |
| gi 194042482 ref XM_001925217.1 | grey        | 205.12718 | 13.245318 | 0.8212237 | 0.08826645 | 36.57   |
| gnl UG Ssc#S40437556            | lightgreen  | 205.01773 | 27.350474 | 0.9682975 | 0.00674368 | 9.518   |
| gnl UG Ssc#S19543409            | red         | 204.88955 | 30.183262 | 0.9123243 | 0.03075084 | 15.066  |
| gnl UG Ssc#S31101927            | darkgreen   | 204.82415 | 17.84546  | -0.387564 | 0.51918635 | 94.564  |
| gi 51592116 ref NM_001004034.1  | orange      | 204.77386 | 13.255041 | 0.9632907 | 0.00839637 | 35.126  |
| gi 52351890 gb AY610308.1       | tan         | 204.76884 | 43.034508 | 0.980321  | 0.00330409 | 56.984  |
| gi 115550130 dbj AK235609.1     | greenyellow | 204.7275  | 32.350722 | 0.9132287 | 0.0302805  | 6.964   |
| gnl UG Ssc#S23689759            | blue        | 204.66902 | 104.06491 | 0.8477895 | 0.06963507 | 2.65    |
| gnl UG Ssc#S40237707            | blue        | 204.60681 | 85.542426 | 0.8043763 | 0.10076113 | 4.126   |
| gnl UG Ssc#S19542900            | greenyellow | 204.53742 | 26.426849 | 0.8791548 | 0.04950453 | 5.062   |
| gnl UG Ssc#S6072575             | lightcyan   | 204.49515 | 39.742683 | 0.9948402 | 0.00044458 | 24.318  |
| gnl UG Ssc#S26403765            | tan         | 204.2258  | 37.194343 | 0.9477089 | 0.01424097 | 17.504  |
| gnl UG Ssc#S18555355            | yellow      | 204.05107 | 30.373562 | 0.7076355 | 0.18121426 | 38.982  |
| gi 108796069 ref NM_001042375.1 | royalblue   | 204.00643 | 19.305042 | 0.9376313 | 0.01852161 | 425.82  |
| gi 178056515 ref NM_001123121.1 | salmon      | 203.92005 | 34.66023  | 0.9259214 | 0.02393249 | 57.226  |
| gnl UG Ssc#S17510781            | lightcyan   | 203.90975 | 39.636677 | 0.9948455 | 0.00044389 | 9.012   |
| gnl UG Ssc#S40473833            | violet      | 203.84186 | 16.172695 | 0.930296  | 0.02185884 | 5.38    |
|                                 | greenyellow |           |           |           |            |         |



|                                 |              |           |           |           |            |         |
|---------------------------------|--------------|-----------|-----------|-----------|------------|---------|
| gi 115547414 dbj AK237795.1     | paleturquois | 203.74027 | 11.334904 | 0.9189116 | 0.02737902 | 83.48   |
| gnl UG Ssc#S40141829            | sienna3      | 203.69713 | 18.598024 | 0.9901175 | 0.00117758 | 360.002 |
| gnl UG Ssc#S18546732            | navy         | 203.66032 | 36.122391 | 0.9784418 | 0.00378742 | 17.412  |
| gi 115547117 dbj AK231172.1     | violet       | 203.60013 | 15.805248 | 0.9403219 | 0.01734322 | 8.534   |
| gnl UG Ssc#S40438133            | salmon       | 203.43007 | 30.522086 | 0.9034769 | 0.03547244 | 17.114  |
| gnl UG Ssc#S17525473            | skyblue3     | 203.41685 | 17.425982 | 0.9953107 | 0.00038521 | 16.206  |
| gi 194034946 ref XM_001924579.1 | magenta      | 203.32408 | 15.795167 | -0.009618 | 0.98775396 | 34.706  |
| gnl UG Ssc#S23689580            | sienna3      | 203.29341 | 18.341056 | 0.987378  | 0.00169904 | 16.92   |
| gi 115555354 dbj AK233967.1     | magenta      | 203.26466 | 16.049145 | 0.1437851 | 0.81755987 | 22.894  |
| gnl UG Ssc#S29971166            | midnightblt  | 203.19643 | 27.180414 | 0.9219463 | 0.0258686  | 7.958   |
| gnl UG Ssc#S18550560            | lightgreen   | 203.19465 | 24.328384 | 0.92827   | 0.02281163 | 8.804   |
| gnl UG Ssc#S26728759            | violet       | 203.00476 | 18.5915   | 0.9409438 | 0.01707446 | 10.946  |
| gi 115545604 dbj AK230719.1     | orange       | 202.92231 | 13.039753 | 0.9660194 | 0.00748091 | 10.292  |
| gi 115555322 dbj AK233937.1     | turquoise    | 202.8641  | 152.90534 | 0.5624395 | 0.323668   | 28.564  |
| gi 194040689 ref XM_001927163.1 | black        | 202.84568 | 33.541487 | 0.876063  | 0.05139158 | 11.754  |
| gnl UG Ssc#S34509910            | brown        | 202.78674 | 75.105528 | 0.9140345 | 0.02986338 | 12.896  |
| gnl UG Ssc#S29970127            | greenyellow  | 202.78276 | 25.13805  | 0.8562759 | 0.06397887 | 6.59    |
| gi 194039733 ref XM_001928398.1 | tan          | 202.74055 | 44.469604 | 0.9846329 | 0.00228149 | 18.998  |
| gi 171905894 gb EU561660.1      | yellow       | 202.69268 | 65.680527 | 0.962721  | 0.00859186 | 347.164 |
| gnl UG Ssc#S40442316            | red          | 202.5214  | 32.051456 | 0.9482077 | 0.01403875 | 75.164  |
| gi 115549624 dbj AK238432.1     | tan          | 202.39306 | 45.239793 | 0.990784  | 0.0010606  | 8.876   |
| gnl UG Ssc#S23764143            | tan          | 202.28776 | 38.729593 | 0.9560003 | 0.01100577 | 13.762  |
| gnl UG Ssc#S17526193            | lightcyan    | 202.03768 | 39.129125 | 0.9921959 | 0.00082663 | 52.596  |
| gi 47522709 ref NM_213885.1     | sienna3      | 201.92049 | 17.618699 | 0.9785746 | 0.00375256 | 10.516  |
| gi 115546138 dbj AK240376.1     | red          | 201.87814 | 33.542743 | 0.9829012 | 0.00267711 | 246.25  |
| gnl UG Ssc#S22273127            | tan          | 201.86542 | 45.098961 | 0.988158  | 0.00154419 | 0.796   |
| gnl UG Ssc#S16517655            | tan          | 201.85794 | 43.610468 | 0.9831339 | 0.00262274 | 30.486  |
| gnl UG Ssc#S17511887            | blue         | 201.7957  | 104.53763 | 0.8456994 | 0.07105085 | 14.268  |
| gnl UG Ssc#S18549337            | midnightblt  | 201.61786 | 27.076265 | 0.920842  | 0.02641504 | 203.516 |
| gnl UG Ssc#S17510525            | yellow       | 201.57085 | 57.391048 | 0.9247669 | 0.02448978 | 65.004  |
| gnl UG Ssc#S17514325            | pink         | 201.5435  | 22.466465 | -0.9131   | 0.03034738 | 34.51   |
| gnl UG Ssc#S19540314            | grey         | 201.52064 | 12.927563 | 0.851826  | 0.06692617 | 46.296  |
| gnl UG Ssc#S26725945            | yellow       | 201.50963 | 51.811106 | 0.8827584 | 0.04733341 | 16.034  |
| gi 167908788 ref NM_001114675.1 | navy         | 201.46894 | 39.452617 | 0.9771462 | 0.0041331  | 63.268  |
| gi 55741808 ref NM_213748.1     | sienna3      | 201.42825 | 17.914691 | 0.9821206 | 0.00286218 | 771.028 |
| gnl UG Ssc#S40004911            | yellow       | 201.40308 | 53.531267 | 0.8856946 | 0.04558733 | 12.948  |
| gi 47522773 ref NM_213973.1     | black        | 201.39185 | 32.195232 | 0.8633737 | 0.05936473 | 38.376  |
| gnl UG Ssc#S26720426            | tan          | 201.29357 | 44.978756 | 0.9876033 | 0.00165381 | 84.368  |
| gnl UG Ssc#S40149996            | blue         | 201.27242 | 114.21846 | 0.8714156 | 0.05426972 | 9.89    |
| gnl UG Ssc#S40034722            | pink         | 201.19432 | 20.332382 | -0.905394 | 0.03443095 | 170.012 |
| gi 52351430 gb AY609860.1       | tan          | 201.12799 | 45.032496 | 0.9910565 | 0.00101395 | 183.848 |
| gnl UG Ssc#S40082625            | turquoise    | 201.07932 | 165.57015 | 0.591585  | 0.29336204 | 3.414   |
| gi 194035737 ref XM_001928295.1 | lightgreen   | 201.03126 | 23.739603 | 0.9245348 | 0.02460228 | 51.598  |
| gi 194036623 ref XM_001927665.1 | tan          | 200.94866 | 43.308234 | 0.9778881 | 0.00393395 | 40.546  |
| gi 194044506 ref XM_001927374.1 | sienna3      | 200.90905 | 19.019109 | 0.9949048 | 0.00043626 | 40.372  |
| gi 52351402 gb AY609832.1       | lightcyan    | 200.81505 | 35.390871 | 0.966871  | 0.00720238 | 8.936   |
| gnl UG Ssc#S18271608            | blue         | 200.80705 | 104.26159 | 0.8465586 | 0.07046775 | 16.276  |
| gi 52351862 gb AY610280.1       | sienna3      | 200.72049 | 16.809403 | 0.9684525 | 0.00669446 | 8.34    |

|                                 |             |           |           |           |            |          |
|---------------------------------|-------------|-----------|-----------|-----------|------------|----------|
| gnl UG Ssc#S39838237            | grey        | 200.41397 | 12.774548 | 0.8546886 | 0.06502543 | 9.218    |
| gnl UG Ssc#S40438408            | lightgreen  | 200.41325 | 28.638987 | 0.9905673 | 0.00109818 | 25.108   |
| gnl UG Ssc#S18284609            | brown       | 200.40393 | 64.227011 | 0.879612  | 0.04922734 | 5.858    |
| gi 194041636 ref XM_001929009.1 | navy        | 200.35825 | 39.328926 | 0.9905168 | 0.0011107  | 67.848   |
| gnl UG Ssc#S23689697            | sienna3     | 200.32865 | 17.537557 | 0.9773896 | 0.0040674  | 11.668   |
| gnl UG Ssc#S22275000            | lightgreen  | 200.2981  | 28.560923 | 0.9918422 | 0.0008834  | 23.974   |
| gi 115553700 dbj AK239887.1     | lightgreen  | 200.26725 | 27.497905 | 0.9853567 | 0.00212245 | 27.32    |
| gi 194039314 ref XM_001926691.1 | lightcyan   | 200.21907 | 36.268844 | 0.9741723 | 0.00496333 | 15.644   |
| gnl UG Ssc#S35723183            | tan         | 200.18841 | 41.023733 | 0.9689588 | 0.00653446 | 73.826   |
| gi 47522821 ref NM_213998.1     | navy        | 200.01922 | 37.012928 | 0.9768514 | 0.00421314 | 8.436    |
| gi 178056662 ref NM_001123124.1 | tan         | 199.90175 | 42.371198 | 0.9724393 | 0.00546972 | 52.698   |
| gnl UG Ssc#S40052404            | midnightblu | 199.79568 | 26.704787 | 0.9165334 | 0.02858182 | 29.116   |
| gi 194042396 ref XM_001927868.1 | skyblue     | 199.57999 | 21.043247 | 0.9493829 | 0.01356607 | 38.41    |
| gi 113205597 ref NM_001044537.1 | yellow      | 199.53673 | 58.325157 | 0.9208665 | 0.02640287 | 16.066   |
| gi 47522797 ref NM_213986.1     | greenyellow | 199.42758 | 30.263401 | 0.8980836 | 0.03845447 | 5.342    |
| gnl UG Ssc#S40509095            | blue        | 199.34818 | 98.953549 | 0.832764  | 0.08000602 | 4.254    |
| gi 115554588 dbj AK236998.1     | darkgreen   | 199.27653 | 17.753474 | -0.375221 | 0.53371322 | 116.708  |
| gi 68534989 ref NM_001025224.1  | navy        | 199.22741 | 37.221235 | 0.9287576 | 0.02258114 | 40.634   |
| gnl UG Ssc#S40463925            | sienna3     | 199.2135  | 19.173667 | 0.99639   | 0.00026023 | 14.326   |
| gnl UG Ssc#S18558114            | yellow      | 199.12411 | 54.329141 | 0.8877725 | 0.04436426 | 14.742   |
| gnl UG Ssc#S18276175            | navy        | 199.06078 | 36.905477 | 0.9773121 | 0.00408829 | 11.772   |
| gi 47523785 ref NM_214364.1     | red         | 198.84508 | 21.147475 | 0.7206486 | 0.16961645 | 50.642   |
| gi 115554840 dbj AK233652.1     | violet      | 198.7736  | 11.43873  | -0.979102 | 0.00361504 | 37.32    |
| gi 115545783 dbj AK234216.1     | tan         | 198.64702 | 37.575693 | 0.9492577 | 0.01361621 | 6.172    |
| gi 52351109 gb AY609514.1       | magenta     | 198.52925 | 15.996616 | 0.0461922 | 0.94120717 | 44.634   |
| gnl UG Ssc#S35322342            | sienna3     | 198.25567 | 19.126949 | 0.9962062 | 0.00028035 | 16.984   |
| gnl UG Ssc#S18262357            | skyblue3    | 198.1767  | 15.833205 | 0.9737453 | 0.0050866  | 16.472   |
| gnl UG Ssc#S22278936            | skyblue3    | 198.16687 | 15.16829  | 0.9637045 | 0.00825534 | 29.478   |
| gi 194042749 ref XM_001925080.1 | skyblue3    | 198.12803 | 16.589602 | 0.9851632 | 0.00216459 | 112.698  |
| gi 194018717 ref NM_001129954.1 | darkmagent  | 198.00923 | 14.585752 | 0.9728041 | 0.00536177 | 2508.122 |
| gi 115547045 dbj AK231100.1     | turquoise   | 197.91196 | 137.05052 | 0.5656078 | 0.3203369  | 10.746   |
| gi 106073315 gb DQ508264.1      | yellowgreer | 197.68013 | 11.070627 | 0.9006546 | 0.03702332 | 7.02     |
| gi 115545681 dbj AK230796.1     | lightgreen  | 197.67592 | 24.117777 | 0.9199879 | 0.02684015 | 37.17    |
| gi 48675952 ref NM_001001643.1  | darkgrey    | 197.60709 | 6.463167  | 0.5792117 | 0.30613439 | 132.738  |
| gi 52351594 gb AY610024.1       | tan         | 197.54452 | 36.725036 | 0.9386778 | 0.01806031 | 6.554    |
| gi 52351103 gb AY609508.1       | orange      | 197.51992 | 13.264332 | 0.94189   | 0.01666818 | 27.312   |
| gnl UG Ssc#S35323677            | darkgrey    | 197.39504 | 15.527911 | 0.9878541 | 0.00160394 | 18.978   |
| gnl UG Ssc#S23693410            | darkgreen   | 197.26545 | 18.013347 | -0.351036 | 0.56240434 | 109.948  |
| gi 194041758 ref XM_001924615.1 | grey        | 197.25486 | 13.212418 | 0.8265311 | 0.08443647 | 25.616   |
| gnl UG Ssc#S27602398            | grey        | 197.20256 | 12.986997 | 0.8660376 | 0.05766114 | 19.366   |
| gnl UG Ssc#S40416565            | pink        | 197.19521 | 20.076524 | -0.952104 | 0.01249235 | 13.78    |
| gnl UG Ssc#S6056024             | grey60      | 197.01087 | 15.844735 | 0.9521673 | 0.01246751 | 24.724   |
| gi 157427704 ref NM_001105288.1 | red         | 196.82284 | 27.548194 | 0.8579291 | 0.06289453 | 8.182    |
| gnl UG Ssc#S34518426            | yellow      | 196.77328 | 54.813771 | 0.8969648 | 0.03908261 | 32.45    |
| gnl UG Ssc#S18355989            | tan         | 196.67135 | 42.963002 | 0.9761938 | 0.0043935  | 22.842   |
| gi 115552428 dbj AK236433.1     | brown       | 196.54973 | 61.2375   | 0.8660165 | 0.05767456 | 80.75    |
|                                 | greenyellow |           |           |           |            |          |

|                                 |              |           |           |           |            |         |
|---------------------------------|--------------|-----------|-----------|-----------|------------|---------|
| gnl UG Ssc#S40022499            | lightcyan    | 196.38272 | 35.673016 | 0.9664777 | 0.00733059 | 2.064   |
| gi 115554174 dbj AK239969.1     | turquoise    | 196.29682 | 151.34757 | 0.5601645 | 0.32606526 | 22.32   |
| gnl UG Ssc#S17510408            | tan          | 196.06141 | 36.050404 | 0.9347548 | 0.01980891 | 35.72   |
| gnl UG Ssc#S31101791            | lightcyan    | 196.02963 | 38.14977  | 0.9847239 | 0.00226129 | 1.252   |
| gi 47522921 ref NM_214053.1     | tan          | 195.96754 | 46.187819 | 0.9941926 | 0.00053079 | 18.694  |
| gi 83921642 ref NM_001038007.1  | grey60       | 195.93005 | 17.452562 | 0.8472915 | 0.06997161 | 256.912 |
| gi 115551938 dbj AK236345.1     | darkgrey     | 195.83045 | 13.678342 | 0.8988149 | 0.03804564 | 51.868  |
| gnl UG Ssc#S40430442            | lightgreen   | 195.57516 | 22.735211 | 0.899787  | 0.03750437 | 3.748   |
| gnl UG Ssc#S23696693            | magenta      | 195.56079 | 20.425523 | 0.8738359 | 0.05276463 | 11.636  |
| gi 212549654 ref NM_001137635.1 | tan          | 195.54245 | 46.312385 | 0.9946736 | 0.00046627 | 12.948  |
| gnl UG Ssc#S19549209            | lightgreen   | 195.48984 | 19.14769  | 0.8976372 | 0.0387047  | 14.346  |
| gi 15864598 emb AJ309014.1      | tan          | 195.46345 | 40.238952 | 0.9650385 | 0.007806   | 14.43   |
| gnl UG Ssc#S18378680            | yellow       | 195.36725 | 29.01684  | 0.7177252 | 0.17220267 | 97.314  |
| gnl UG Ssc#S18377137            | skyblue3     | 195.15374 | 15.223758 | 0.9664402 | 0.00734286 | 73.502  |
| gi 115553569 dbj AK239756.1     | lightgreen   | 195.13403 | 20.7102   | 0.8744619 | 0.05237758 | 59.98   |
| gnl UG Ssc#S23700002            | greenyellow  | 195.01584 | 28.909959 | 0.9019124 | 0.03632953 | 57.814  |
| gi 194037785 ref XM_001924937.1 | navy         | 194.94149 | 41.802539 | 0.9686767 | 0.00662345 | 5.108   |
| gnl UG Ssc#S23695896            | salmon       | 194.8734  | 19.510941 | 0.8036397 | 0.10131878 | 92.594  |
| gnl UG Ssc#S40150666            | navy         | 194.68293 | 35.97905  | 0.9850249 | 0.00219488 | 8.148   |
| gi 77628017 ref NM_001008689.2  | paleturquois | 194.6556  | 12.094983 | 0.9197177 | 0.02697511 | 67.544  |
| gnl UG Ssc#S31106641            | pink         | 194.61232 | 19.490555 | -0.964077 | 0.00812906 | 16.302  |
| gi 113205653 ref NM_001044551.1 | greenyellow  | 194.56665 | 23.376264 | 0.8351881 | 0.07830286 | 12.034  |
| gi 115549368 dbj AK235390.1     | turquoise    | 194.41986 | 143.39533 | 0.5496121 | 0.33724267 | 7.176   |
| gi 115553216 dbj AK233014.1     | skyblue3     | 194.40318 | 16.604772 | 0.9837707 | 0.00247584 | 38.164  |
| gnl UG Ssc#S18383839            | skyblue3     | 194.2972  | 16.302799 | 0.9821345 | 0.00285884 | 35.478  |
| gi 52351075 gb AY609480.1       | sienna3      | 194.16198 | 18.987882 | 0.9947441 | 0.00045705 | 22.592  |
| gnl UG Ssc#S17513836            | turquoise    | 194.03985 | 156.09338 | 0.5671019 | 0.31876899 | 22.414  |
| gi 194037532 ref XM_001929272.1 | navy         | 193.97399 | 40.572236 | 0.9646385 | 0.00793985 | 28.722  |
| gi 115551177 dbj AK232610.1     | tan          | 193.95266 | 38.505152 | 0.9551875 | 0.01131074 | 44.448  |
| gnl UG Ssc#S18357321            | blue         | 193.71779 | 102.20694 | 0.8440414 | 0.07218014 | 15.414  |
| gnl UG Ssc#S23766579            | violet       | 193.554   | 18.346598 | 0.9733226 | 0.00520958 | 30.314  |
| gi 113205623 ref NM_001044545.1 | yellow       | 193.35802 | 62.992901 | 0.9585537 | 0.0100657  | 199.004 |
| gnl UG Ssc#S6089318             | red          | 193.34971 | 24.159304 | 0.8227702 | 0.08714508 | 21.458  |
| gi 48675954 ref NM_001001644.1  | lightgreen   | 193.23088 | 27.517361 | 0.9899947 | 0.00119958 | 26.284  |
| gnl UG Ssc#S18379413            | tan          | 193.13212 | 37.410104 | 0.948363  | 0.01397601 | 3.788   |
| gi 194041134 ref XM_001928893.1 | darkgrey     | 192.98281 | 12.490023 | 0.9526251 | 0.01228985 | 2.488   |
| gi 118403821 ref NM_001078679.1 | lightcyan    | 192.96583 | 37.442312 | 0.9822335 | 0.00283515 | 70.448  |
| gnl UG Ssc#S16514775            | lightgreen   | 192.91895 | 20.855152 | 0.8943022 | 0.04059054 | 31.176  |
| gnl UG Ssc#S18557007            | red          | 192.85987 | 23.414298 | 0.8011819 | 0.10318629 | 10.626  |
| gi 115548658 dbj AK231642.1     | grey         | 192.76578 | 12.84975  | 0.8245211 | 0.08588081 | 100.078 |
| gnl UG Ssc#S19548981            | tan          | 192.72982 | 35.062981 | 0.9355396 | 0.01945491 | 570.218 |
| gnl UG Ssc#S26389653            | skyblue      | 192.5179  | 20.138386 | 0.938739  | 0.01803345 | 6.924   |
| gi 115546953 dbj AK240599.1     | pink         | 192.5048  | 23.986434 | 0.9197711 | 0.02694844 | 24.184  |
| gnl UG Ssc#S26648597            | turquoise    | 192.46923 | 156.29711 | 0.5643318 | 0.32167743 | 20.184  |
| gi 115546324 dbj AK230843.1     | tan          | 192.46816 | 43.462583 | 0.9824419 | 0.00278549 | 94.05   |
| gi 148231659 ref NM_001097516.1 | purple       | 192.42249 | 44.985977 | 0.9350293 | 0.01968482 | 1.39    |
| gi 194040280 ref XM_001925339.1 | yellow       | 192.37329 | 60.255757 | 0.9370576 | 0.0187761  | 247.244 |
| gnl UG Ssc#S31102306            | violet       | 192.34422 | 12.692841 | -0.980629 | 0.00322695 | 18.7    |

|                                 |             |           |           |           |            |         |
|---------------------------------|-------------|-----------|-----------|-----------|------------|---------|
| gnl UG Ssc#S19540934            | darkmagent  | 191.97623 | 15.575106 | 0.9889996 | 0.00138271 | 13.832  |
| gi 115546439 dbj AK230958.1     | yellow      | 191.91566 | 52.473761 | 0.9017992 | 0.03639179 | 21.478  |
| gi 113205811 ref NM_001044593.1 | paleturquoi | 191.34198 | 10.585045 | 0.8733946 | 0.05303807 | 255.88  |
| gi 194036925 ref XM_001925464.1 | grey        | 191.24005 | 13.123772 | 0.8716516 | 0.05412236 | 26.46   |
| gnl UG Ssc#S40452557            | red         | 191.14531 | 24.805783 | 0.77447   | 0.12412907 | 27.274  |
| gnl UG Ssc#S40524913            | red         | 191.14157 | 31.545712 | 0.9250841 | 0.02433621 | 224.486 |
| gi 51592146 ref NM_001004050.1  | orange      | 191.11538 | 13.084015 | 0.9340368 | 0.02013456 | 19.992  |
| gi 115552623 dbj AK232828.1     | skyblue3    | 191.03792 | 13.817214 | 0.9415474 | 0.01681492 | 4.258   |
| gi 115550042 dbj AK232277.1     | yellow      | 190.95441 | 47.033077 | 0.8429291 | 0.07294086 | 103.692 |
| gnl UG Ssc#S43495814            | pink        | 190.74008 | 19.137742 | -0.957971 | 0.01027775 | 5.454   |
| gi 194034776 ref XM_001928952.1 | tan         | 190.65099 | 43.859901 | 0.9822085 | 0.00284113 | 65.866  |
| gi 90017493 ref NM_214184.2     | blue        | 190.58635 | 117.89523 | 0.8773807 | 0.05058462 | 341.618 |
| gnl UG Ssc#S17518385            | pink        | 190.57461 | 21.973619 | -0.907945 | 0.03306102 | 1.658   |
| gnl UG Ssc#S39935005            | darkgreen   | 190.56158 | 15.645559 | -0.319771 | 0.59990359 | 17.396  |
| gnl UG Ssc#S27602719            | tan         | 190.53024 | 45.468499 | 0.9913834 | 0.0009589  | 15.562  |
| gnl UG Ssc#S40012596            | darkgreen   | 190.37221 | 17.503112 | -0.383983 | 0.52339281 | 8.502   |
| gnl UG Ssc#S18383139            | lightgreen  | 190.35903 | 27.302621 | 0.9901451 | 0.00117266 | 6.446   |
| gi 115547985 dbj AK237969.1     | yellow      | 190.17434 | 39.430192 | 0.8077792 | 0.09819699 | 5.624   |
| gi 148235350 ref NM_001097475.1 | turquoise   | 190.1677  | 153.43787 | 0.5521209 | 0.33457674 | 37.136  |
| gi 52351148 gb AY609553.1       | skyblue     | 190.08333 | 22.420748 | 0.9593714 | 0.00977052 | 104.5   |
| gnl UG Ssc#S40163661            | greenyellow | 190.05376 | 23.798757 | 0.8540939 | 0.06541891 | 108.05  |
| gnl UG Ssc#S16770187            | darkgreen   | 189.88241 | 17.038538 | -0.437524 | 0.46124901 | 82.2    |
| gnl UG Ssc#S23756992            | magenta     | 189.71399 | 16.357941 | 0.2089308 | 0.73592935 | 34.946  |
| gnl UG Ssc#S18550420            | tan         | 189.65183 | 42.406533 | 0.9759118 | 0.00447163 | 49.058  |
| gi 194041796 ref XM_001928803.1 | turquoise   | 189.48701 | 154.46797 | 0.5961956 | 0.28863896 | 27.29   |
| gi 47522681 ref NM_213901.1     | blue        | 189.41512 | 108.1267  | 0.857876  | 0.06292932 | 2.198   |
| gnl UG Ssc#S17517598            | violet      | 189.11658 | 18.560683 | 0.9770835 | 0.0041501  | 8.158   |
| gnl UG Ssc#S39779823            | yellow      | 188.97191 | 56.177885 | 0.9405319 | 0.01725233 | 14.14   |
| gnl UG Ssc#S18359292            | yellow      | 188.95357 | 28.25454  | 0.7127382 | 0.17664039 | 7.16    |
| gnl UG Ssc#S40439733            | turquoise   | 188.7673  | 136.5304  | 0.5584914 | 0.32783111 | 40.994  |
| gi 52350690 gb AY609406.1       | darkgreen   | 188.75063 | 16.938603 | -0.305901 | 0.61667782 | 5.308   |
| gi 194043669 ref XM_001924741.1 | blue        | 188.68431 | 81.395634 | 0.7953558 | 0.10765415 | 36.884  |
| gnl UG Ssc#S31114178            | tan         | 188.5766  | 40.002182 | 0.9585737 | 0.01005845 | 55.516  |
| gi 115548932 dbj AK235335.1     | tan         | 188.56113 | 44.940765 | 0.9904673 | 0.00111568 | 37.506  |
| gnl UG Ssc#S24609641            | navy        | 188.45486 | 42.468422 | 0.9715481 | 0.0057364  | 10.178  |
| gi 194042477 ref XM_001926521.1 | navy        | 188.37557 | 36.858657 | 0.9844235 | 0.0023282  | 57.16   |
| gnl UG Ssc#S26720420            | midnightblu | 188.3452  | 23.603758 | 0.8786466 | 0.04981315 | 86.952  |
| gnl UG Ssc#S23213478            | lightgreen  | 188.29701 | 15.84861  | 0.814378  | 0.09328251 | 5.364   |
| gnl UG Ssc#S40049981            | sienna3     | 188.21642 | 18.351336 | 0.9871526 | 0.00174469 | 34.418  |
| gnl UG Ssc#S23696616            | blue        | 188.16807 | 91.013886 | 0.8151787 | 0.09269142 | 213.292 |
| gnl UG Ssc#S40247487            | sienna3     | 188.13933 | 18.908012 | 0.9936063 | 0.00061313 | 29.016  |
| gnl UG Ssc#S18359264            | turquoise   | 188.01353 | 152.82261 | 0.5581779 | 0.32816231 | 32.5    |
| gi 194042833 ref XM_001929033.1 | tan         | 188.00008 | 30.802308 | 0.9023048 | 0.03611392 | 13.58   |
| gi 115549402 dbj AK235424.1     | tan         | 187.9817  | 31.916264 | 0.9098335 | 0.0320582  | 11.832  |
| gi 115549511 dbj AK235533.1     | pink        | 187.89491 | 20.878726 | -0.918683 | 0.02749409 | 44.316  |
| gi 115554022 dbj AK233231.1     | navy        | 187.84313 | 38.465815 | 0.9250721 | 0.02434204 | 123.292 |
| gnl UG Ssc#S23690535            | blue        | 187.74501 | 97.96503  | 0.8374435 | 0.07672851 | 16.27   |
| gnl UG Ssc#S40066476            | turquoise   | 187.67062 | 122.9232  | 0.5180681 | 0.37120127 | 94.09   |

|                                 |              |           |           |           |            |         |
|---------------------------------|--------------|-----------|-----------|-----------|------------|---------|
| gnl UG Ssc#S31123459            | navy         | 187.64231 | 13.925991 | -0.594347 | 0.29052979 | 17.488  |
| gi 194035108 ref XM_001926680.1 | navy         | 187.52776 | 42.008385 | 0.9687934 | 0.00658657 | 29.818  |
| gnl UG Ssc#S23697971            | magenta      | 187.47599 | 14.017773 | -0.094773 | 0.87951191 | 38.654  |
| gi 194037021 ref XM_001926975.1 | grey         | 187.34226 | 12.763136 | 0.8957609 | 0.03976217 | 6.44    |
| gi 147903738 ref NM_001097413.1 | royalblue    | 187.18039 | 19.61021  | 0.9714178 | 0.00577573 | 8.064   |
| gnl UG Ssc#S19541523            | greenyellow  | 187.05108 | 22.587438 | 0.8261527 | 0.08470778 | 47.06   |
| gi 115550567 dbj AK232397.1     | navy         | 187.00235 | 42.764261 | 0.9814961 | 0.00301314 | 9.754   |
| gi 115545984 dbj AK237425.1     | greenyellow  | 187.00178 | 28.420096 | 0.8951417 | 0.04011315 | 24.934  |
| gi 194036030 ref XM_001928495.1 | magenta      | 186.96129 | 16.087931 | 0.183661  | 0.76747698 | 62.056  |
| gnl UG Ssc#S23700560            | lightcyan    | 186.83912 | 36.063595 | 0.9714337 | 0.00577093 | 8.686   |
| gi 115554284 dbj AK240079.1     | turquoise    | 186.80765 | 122.81699 | 0.5011542 | 0.38973005 | 28.994  |
| gnl UG Ssc#S6072888             | navy         | 186.60296 | 36.334281 | 0.9899241 | 0.00121228 | 11.72   |
| gnl UG Ssc#S34495577            | lightgreen   | 186.30643 | 17.329136 | 0.8364936 | 0.07739038 | 17.436  |
| gi 48675956 ref NM_001001645.1  | lightgreen   | 186.24619 | 24.5494   | 0.9586845 | 0.0100183  | 73.758  |
| gnl UG Ssc#S40407699            | red          | 186.08129 | 23.473172 | 0.7811114 | 0.11881431 | 31.142  |
| gnl UG Ssc#S40464521            | lightcyan    | 185.88635 | 33.217408 | 0.954324  | 0.01163771 | 21.412  |
| gi 194043908 ref XM_001927890.1 | tan          | 185.8111  | 36.152059 | 0.9400359 | 0.01746728 | 89.858  |
| gnl UG Ssc#S6048306             | pink         | 185.75769 | 21.797792 | 0.8020726 | 0.10250831 | 5.922   |
| gi 194036211 ref XM_001927870.1 | blue         | 185.64287 | 111.33326 | 0.8644517 | 0.05867349 | 1.58    |
| gnl UG Ssc#S23696689            | lightgreen   | 185.59114 | 19.733438 | 0.8825796 | 0.0474404  | 77.724  |
| gnl UG Ssc#S19546334            | magenta      | 185.46794 | 14.776005 | 0.0221404 | 0.97181223 | 32.06   |
| gi 115550345 dbj AK238610.1     | paleturquois | 185.45245 | 11.784183 | 0.9062455 | 0.03397179 | 20.006  |
| gnl UG Ssc#S18380498            | magenta      | 185.21728 | 15.330826 | 0.0773402 | 0.90162567 | 5.842   |
| gnl UG Ssc#S17515316            | lightgreen   | 185.20596 | 25.116297 | 0.9651024 | 0.00778467 | 121.986 |
| gi 47522855 ref NM_214017.1     | navy         | 185.13407 | 38.531088 | 0.9724338 | 0.00547136 | 15.032  |
| gi 115550943 dbj AK238804.1     | pink         | 185.04959 | 21.167013 | -0.94696  | 0.0145464  | 93.744  |
| gnl UG Ssc#S34497945            | yellow       | 184.91656 | 56.508983 | 0.9107235 | 0.03158908 | 14.224  |
| gi 178056525 ref NM_001123147.1 | navy         | 184.85138 | 42.129895 | 0.9939521 | 0.00056409 | 11.552  |
| gnl UG Ssc#S40055771            | lightgreen   | 184.83014 | 23.489021 | 0.9323326 | 0.02091437 | 13.998  |
| gi 194034626 ref XM_001929026.1 | red          | 184.63    | 32.43235  | 0.9437085 | 0.01589634 | 56.798  |
| gnl UG Ssc#S31101691            | magenta      | 184.46114 | 14.845288 | -0.001464 | 0.99813629 | 22.432  |
| gnl UG Ssc#S40276387            | brown        | 184.39722 | 62.128998 | 0.8718856 | 0.05397636 | 5.502   |
| gnl UG Ssc#S18550712            | pink         | 184.35727 | 20.392646 | 0.7724198 | 0.1257837  | 21.084  |
| gnl UG Ssc#S18291761            | brown        | 184.27407 | 51.295286 | 0.8294738 | 0.0823356  | 6.868   |
| gi 194035517 ref XM_001925462.1 | grey60       | 184.22985 | 17.644662 | 0.8902831 | 0.04290073 | 39.19   |
| gnl UG Ssc#S18553224            | lightgreen   | 184.04736 | 21.447406 | 0.8914953 | 0.04219968 | 8.226   |
| gi 115549321 dbj AK232099.1     | tan          | 184.00218 | 28.382846 | 0.8819055 | 0.04784446 | 57.04   |
| gi 47523887 ref NM_214418.1     | greenyellow  | 183.53934 | 23.163933 | 0.8489064 | 0.06888214 | 149.84  |
| gnl UG Ssc#S26723327            | brown        | 183.43005 | 63.6877   | 0.8735797 | 0.05292337 | 16.458  |
| gnl UG Ssc#S18381735            | grey         | 183.37487 | 13.142151 | 0.8340209 | 0.07912155 | 10.508  |
| gnl UG Ssc#S18359101            | pink         | 183.29228 | 16.567604 | -0.975138 | 0.00468839 | 5.536   |
| gnl UG Ssc#S19540289            | royalblue    | 183.20038 | 20.376649 | 0.9438004 | 0.01585762 | 6.934   |
| gi 115545597 dbj AK230712.1     | lightgreen   | 183.19765 | 20.194974 | 0.897215  | 0.03894189 | 65.402  |
| gi 194041305 ref XM_001927960.1 | turquoise    | 183.17969 | 149.17585 | 0.5487148 | 0.33819743 | 23.102  |
| gnl UG Ssc#S26726837            | tan          | 183.15516 | 31.351568 | 0.9123116 | 0.03075747 | 20.428  |
| gnl UG Ssc#S22287785            | red          | 183.1086  | 31.598848 | 0.9119357 | 0.03095368 | 4.596   |
| gnl UG Ssc#S19545927            | yellow       | 182.98148 | 43.06111  | 0.8399077 | 0.07501969 | 14.018  |
| gi 1912 emb X07617.1            | darkgreen    | 182.93644 | 18.187658 | 0.9104563 | 0.03172968 | 34.448  |

|                                 |             |           |           |           |            |         |
|---------------------------------|-------------|-----------|-----------|-----------|------------|---------|
| gnl UG Ssc#S23756850            | darkmagent  | 182.73244 | 14.805943 | 0.9797652 | 0.00344477 | 55.374  |
| gi 194036739 ref XM_001927255.1 | yellow      | 182.22983 | 46.950494 | 0.842003  | 0.07357613 | 77.578  |
| gnl UG Ssc#S23775239            | yellow      | 182.01691 | 56.035417 | 0.9052065 | 0.03453249 | 17.382  |
| gi 52351591 gb AY610021.1       | magenta     | 181.98273 | 23.128477 | 0.9002465 | 0.03724937 | 27.786  |
| gi 115553400 dbj AK236603.1     | grey        | 181.94265 | 12.848681 | 0.8843983 | 0.04635563 | 6.536   |
| gi 115551834 dbj AK236241.1     | lightgreen  | 181.65799 | 17.895877 | 0.8587979 | 0.06232701 | 43.006  |
| gnl UG Ssc#S18359711            | lightgreen  | 181.58867 | 16.841254 | 0.8272165 | 0.08394569 | 17.928  |
| gi 212549656 ref NM_001137636.1 | tan         | 181.52075 | 35.179879 | 0.9347054 | 0.01983126 | 23.322  |
| gnl UG Ssc#S19547916            | skyblue3    | 181.51264 | 13.702288 | 0.9388743 | 0.0179741  | 8.552   |
| gi 115551673 dbj AK239137.1     | orange      | 181.48404 | 12.612211 | 0.920755  | 0.02645825 | 16.15   |
| gi 194042479 ref XM_001926556.1 | skyblue     | 180.93403 | 14.576056 | 0.8704582 | 0.0548687  | 23.838  |
| gnl UG Ssc#S23691900            | white       | 180.85453 | 19.378268 | 0.9090951 | 0.0324491  | 50.754  |
| gi 194039546 ref XM_001928863.1 | lightcyan   | 180.75414 | 34.614842 | 0.9665973 | 0.00729154 | 57.158  |
| gnl UG Ssc#S18551688            | lightgreen  | 180.64802 | 15.536448 | 0.7995738 | 0.10441382 | 30.686  |
| gnl UG Ssc#S18383442            | yellow      | 180.51916 | 52.463862 | 0.9142477 | 0.02975333 | 58.036  |
| gnl UG Ssc#S31134054            | turquoise   | 180.44927 | 161.1939  | 0.6018119 | 0.28291296 | 5.442   |
| gi 52352069 gb AY610485.1       | yellow      | 180.42378 | 53.154792 | 0.8975901 | 0.03873116 | 32.996  |
| gnl UG Ssc#S34529539            | tan         | 180.33774 | 41.820244 | 0.9750268 | 0.00471968 | 18.414  |
| gnl UG Ssc#S6665509             | navy        | 180.31605 | 43.136862 | 0.9866669 | 0.00184441 | 6.676   |
| gnl UG Ssc#S29462637            | yellowgreer | 179.96878 | 10.030152 | 0.8809992 | 0.04838946 | 2.532   |
| gi 115548942 dbj AK235345.1     | lightgreen  | 179.87998 | 21.006034 | 0.9064797 | 0.03384581 | 28.504  |
| gi 148237120 ref NM_001097421.1 | pink        | 179.76811 | 15.978084 | 0.7056213 | 0.18302889 | 34.622  |
| gnl UG Ssc#S18554887            | midnightblt | 179.69837 | 23.731424 | 0.8871135 | 0.044751   | 22.488  |
| gi 115548727 dbj AK231793.1     | pink        | 179.39793 | 22.1671   | 0.9536833 | 0.01188229 | 32.84   |
| gi 47522957 ref NM_214072.1     | yellow      | 179.2461  | 45.414377 | 0.8319528 | 0.08057845 | 95.514  |
| gi 115552575 dbj AK232780.1     | red         | 179.18806 | 32.85326  | 0.9678195 | 0.00689629 | 16.154  |
| gi 115549239 dbj AK231915.1     | yellow      | 179.13781 | 31.399953 | 0.715285  | 0.17437005 | 111.924 |
| gi 47523463 ref NM_214188.1     | brown       | 179.10423 | 55.519246 | 0.8450697 | 0.07147911 | 31.082  |
| gi 52351601 gb AY610031.1       | lightgreen  | 178.97473 | 21.674193 | 0.9134301 | 0.0301761  | 4.336   |
| gnl UG Ssc#S22282766            | lightcyan   | 178.81511 | 31.461867 | 0.9462815 | 0.01482482 | 13.72   |
| gnl UG Ssc#S15981094            | orange      | 178.56647 | 11.912924 | 0.9524905 | 0.012342   | 15.678  |
| gi 115546047 dbj AK237489.1     | darkmagent  | 178.47958 | 14.796102 | 0.974846  | 0.0047709  | 10.278  |
| gnl UG Ssc#S18554614            | navy        | 178.42335 | 14.492904 | -0.514731 | 0.37483985 | 2.938   |
| gnl UG Ssc#S19538640            | lightcyan   | 178.393   | 31.015494 | 0.9330886 | 0.02056724 | 6.988   |
| gnl UG Ssc#S26727906            | grey60      | 178.38306 | 17.062463 | 0.9207254 | 0.02647296 | 16.36   |
| gi 47522763 ref NM_213968.1     | orange      | 178.33142 | 12.672238 | 0.9434068 | 0.01602354 | 234.386 |
| gi 115553814 dbj AK236819.1     | lightgreen  | 178.29157 | 23.177407 | 0.9259874 | 0.02390075 | 45.65   |
| gnl UG Ssc#S34533729            | royalblue   | 178.08762 | 20.398262 | 0.960982  | 0.00919756 | 6.198   |
| gi 194035288 ref XM_001927095.1 | yellow      | 178.00472 | 50.833035 | 0.8907943 | 0.04260462 | 81.224  |
| gnl UG Ssc#S18360059            | lightcyan   | 177.90343 | 33.44037  | 0.9550698 | 0.01135513 | 22.976  |
| gi 115549613 dbj AK238421.1     | yellow      | 177.8387  | 28.437932 | 0.6684007 | 0.21745812 | 31.34   |
| gi 52352038 gb AY610454.1       | sienna3     | 177.82496 | 16.438503 | 0.9643029 | 0.00805275 | 36.16   |
| gi 115550889 dbj AK235964.1     | tan         | 177.78183 | 40.849083 | 0.9686713 | 0.00662514 | 72.51   |
| gnl UG Ssc#S23701124            | red         | 177.37212 | 31.518411 | 0.9554335 | 0.01121816 | 12.068  |
| gi 115547679 dbj AK231337.1     | navy        | 177.3645  | 37.146057 | 0.9104572 | 0.03172921 | 25.824  |
| gnl UG Ssc#S40059478            | violet      | 177.08582 | 15.769127 | 0.9928355 | 0.00072718 | 14.114  |

paleturquois

|                                 |              |           |           |           |            |          |
|---------------------------------|--------------|-----------|-----------|-----------|------------|----------|
| gnl UG Ssc#S19540541            | violet       | 176.53602 | 13.259197 | -0.968096 | 0.00680779 | 2.988    |
| gi 115547647 dbj AK231305.1     | pink         | 176.52277 | 23.953452 | 0.8511621 | 0.06736941 | 21.352   |
| gnl UG Ssc#S18357219            | blue         | 176.44962 | 108.65476 | 0.8606016 | 0.06115393 | 19.648   |
| gnl UG Ssc#S34521911            | yellow       | 176.35716 | 26.590274 | 0.6603735 | 0.22509677 | 15.014   |
| gnl UG Ssc#S21579717            | greenyellow  | 176.32517 | 22.636749 | 0.8367615 | 0.07720354 | 17.34    |
| gi 47523843 ref NM_214395.1     | darkgrey     | 176.28322 | 6.3332434 | 0.5803306 | 0.30497367 | 0.894    |
| gi 115554993 dbj AK240192.1     | paleturquois | 176.25755 | 15.312233 | 0.9704691 | 0.0060648  | 13.056   |
| gnl UG Ssc#S40490801            | red          | 175.96742 | 30.996011 | 0.9332001 | 0.02051623 | 6.584    |
| gi 47523719 ref NM_214330.1     | darkmagent   | 175.80915 | 15.599485 | 0.988616  | 0.00145557 | 125.312  |
| gi 115554528 dbj AK233538.1     | lightgreen   | 175.77774 | 22.246661 | 0.9237547 | 0.02498175 | 12.568   |
| gnl UG Ssc#S19542061            | darkgreen    | 175.75778 | 16.230774 | -0.32977  | 0.58786375 | 158.654  |
| gnl UG Ssc#S17512269            | lightgreen   | 175.75006 | 23.29288  | 0.9431101 | 0.01614898 | 49.668   |
| gnl UG Ssc#S26734441            | violet       | 175.6397  | 10.267183 | -0.922469 | 0.02561139 | 39.184   |
| gi 194038088 ref XM_001925288.1 | lightcyan    | 175.36023 | 33.072965 | 0.9508345 | 0.01298958 | 64.2     |
| gnl UG Ssc#S18558291            | black        | 175.20012 | 23.77261  | 0.7792505 | 0.12029649 | 79.164   |
| gi 178056709 ref NM_001123194.1 | royalblue    | 174.95726 | 21.155347 | 0.9501177 | 0.01327324 | 51.162   |
| gnl UG Ssc#S31119321            | red          | 174.95351 | 31.013969 | 0.9059653 | 0.03412272 | 8.61     |
| gi 164664445 ref NM_001113439.1 | magenta      | 174.94683 | 16.295743 | 0.7709721 | 0.12695603 | 76.338   |
| gi 115555475 dbj AK234088.1     | pink         | 174.83196 | 24.269493 | 0.9388649 | 0.01797823 | 29.174   |
| gnl UG Ssc#S23689765            | paleturquois | 174.69132 | 14.128944 | 0.9655847 | 0.00762441 | 35.96    |
| gnl UG Ssc#S18552312            | navy         | 174.4436  | 42.796415 | 0.9728057 | 0.00536132 | 24.178   |
| gnl UG Ssc#S18548755            | blue         | 174.41818 | 84.997219 | 0.8081878 | 0.09789048 | 26.628   |
| gnl UG Ssc#S40195327            | turquoise    | 174.41374 | 154.61111 | 0.5922848 | 0.2926438  | 56.738   |
| gi 194040558 ref XM_001928742.1 | lightcyan    | 174.38141 | 25.239777 | 0.8893712 | 0.04343049 | 2412.036 |
| gnl UG Ssc#S40437142            | lightgreen   | 174.30542 | 23.321649 | 0.936702  | 0.0189344  | 2.62     |
| gi 194332486 ref NM_001130213.1 | yellow       | 174.29626 | 37.704588 | 0.8295088 | 0.08231066 | 62.604   |
| gi 154147629 ref NM_001100190.1 | salmon       | 174.18285 | 19.199774 | 0.8066501 | 0.09904557 | 58.338   |
| gnl UG Ssc#S34512833            | royalblue    | 174.15523 | 22.112986 | 0.9788599 | 0.00367802 | 29.922   |
| gnl UG Ssc#S17525080            | pink         | 173.99675 | 7.050326  | -0.500763 | 0.39016078 | 22.318   |
| gnl UG Ssc#S23692872            | greenyellow  | 173.8004  | 25.096915 | 0.8628612 | 0.05969428 | 33.016   |
| gnl UG Ssc#S6085536             | paleturquois | 173.60291 | 13.768095 | 0.933521  | 0.02036958 | 29.996   |
| gi 194041222 ref XM_001925236.1 | red          | 173.55189 | 23.049929 | 0.7086207 | 0.18032853 | 12.928   |
| gnl UG Ssc#S22274609            | red          | 173.54772 | 30.878599 | 0.8972202 | 0.03893897 | 11.798   |
| gnl UG Ssc#S18552418            | tan          | 173.4788  | 32.14887  | 0.915268  | 0.02922854 | 8.242    |
| gnl UG Ssc#S17516571            | magenta      | 173.36024 | 9.7004839 | 0.5792327 | 0.30611266 | 9.348    |
| gnl UG Ssc#S34529144            | tan          | 173.1673  | 43.163586 | 0.9776342 | 0.00400174 | 9.882    |
| gnl UG Ssc#S26720632            | darkmagent   | 172.97894 | 9.9327657 | 0.8804087 | 0.04874556 | 26.246   |
| gnl UG Ssc#S23768582            | lightgreen   | 172.85158 | 17.657213 | 0.8657926 | 0.05781714 | 34.74    |
| gi 194038017 ref XM_001928309.1 | blue         | 172.73771 | 94.739554 | 0.8308578 | 0.08135318 | 14.29    |
| gi 194037543 ref XM_001929293.1 | darkmagent   | 172.5665  | 14.112615 | 0.962706  | 0.00859703 | 45.09    |
| gnl UG Ssc#S17525025            | navy         | 172.43893 | 13.952654 | -0.691555 | 0.19584336 | 10.782   |
| gnl UG Ssc#S26408370            | greenyellow  | 172.42417 | 17.408348 | 0.7609989 | 0.13511904 | 11.406   |
| gi 157427710 ref NM_001105292.1 | turquoise    | 172.42247 | 96.042495 | 0.4666074 | 0.42822066 | 23.182   |
| gi 194037684 ref XM_001927128.1 | darkgreen    | 172.41744 | 15.984271 | -0.280498 | 0.64759949 | 60.958   |
| gi 115545868 dbj AK234301.1     | navy         | 172.35938 | 42.658099 | 0.9808615 | 0.00316916 | 24.518   |
| gi 166796054 ref NM_001114281.1 | darkgreen    | 172.28343 | 6.9652589 | 0.6276486 | 0.25696831 | 19.712   |
| gnl UG Ssc#S40127760            | pink         | 172.1779  | 10.158765 | 0.4886427 | 0.40357241 | 8.884    |
| gnl UG Ssc#S23763873            | pink         | 171.88816 | 21.903403 | 0.9214544 | 0.02611156 | 14.282   |

|                                   |              |           |           |           |            |         |
|-----------------------------------|--------------|-----------|-----------|-----------|------------|---------|
| gnl UG Ssc#S17524628              | royalblue    | 171.69492 | 19.655141 | 0.9647197 | 0.00791264 | 4.236   |
| gnl UG Ssc#S23695762              | yellow       | 171.52383 | 45.526489 | 0.8375726 | 0.07663872 | 20.406  |
| gi 1245714 gb S80644.1            | magenta      | 171.34914 | 19.809603 | 0.8571833 | 0.06338297 | 30.716  |
| gi 47523691 ref NM_214313.1       | skyblue3     | 171.26498 | 13.143773 | 0.9319975 | 0.02106886 | 26.474  |
| gnl UG Ssc#S23693357              | darkgrey     | 171.06364 | 6.1986247 | 0.4994198 | 0.39164214 | 50.878  |
| gnl UG Ssc#S40326987              | turquoise    | 170.91826 | 110.87639 | 0.4824437 | 0.41047234 | 38.706  |
| gi 194035207 ref XM_001925835.1   | yellow       | 170.84341 | 38.446939 | 0.7813714 | 0.1186076  | 37.614  |
| gnl UG Ssc#S31125151              | skyblue      | 170.80748 | 18.804276 | 0.9178274 | 0.0279253  | 57.942  |
| gnl UG Ssc#S35325457              | red          | 170.61448 | 30.406505 | 0.8733813 | 0.05304635 | 6.118   |
| gi 47522753 ref NM_213962.1       | greenyellow  | 170.61043 | 20.905666 | 0.8078774 | 0.09812334 | 95.5    |
| gnl UG Ssc#S23766475              | paleturquois | 170.59382 | 15.467605 | 0.9672321 | 0.00708535 | 60.514  |
| gnl UG Ssc#S40495537              | navy         | 170.42845 | 34.982871 | 0.990572  | 0.00109735 | 122.606 |
| gi 115545865 dbj AK234298.1       | darkgreen    | 170.16344 | 15.985807 | 0.8118094 | 0.09518638 | 11.812  |
| gnl UG Ssc#S17518692              | skyblue      | 170.09378 | 19.49924  | 0.9279202 | 0.02297749 | 8.342   |
| gnl UG Ssc#S23766544              | pink         | 170.05899 | 23.330422 | 0.8725587 | 0.0535572  | 23.09   |
| gnl UG Ssc#S39808414              | pink         | 169.57702 | 8.7811815 | 0.359106  | 0.55279862 | 1.484   |
| gnl UG Ssc#S22283855              | tan          | 169.25354 | 23.04662  | 0.8335682 | 0.0794397  | 11.632  |
| gnl UG Ssc#S40063653              | pink         | 169.24436 | 7.5420904 | -0.535184 | 0.35267566 | 1.42    |
| gnl UG Ssc#S22275237              | turquoise    | 169.22777 | 118.61614 | 0.5071057 | 0.3831857  | 5.678   |
| gi 194039490 ref XM_001927338.1   | navy         | 169.17085 | 36.61099  | 0.9574273 | 0.01047702 | 81.926  |
| gnl UG Ssc#S18550348              | greenyellow  | 168.96988 | 20.66655  | 0.8001479 | 0.1039751  | 8.486   |
| gi 115551411 dbj AK236089.1       | black        | 168.71714 | 25.195003 | 0.7995765 | 0.10441172 | 7.524   |
| gi 6007613 gb AF120099.1 AF120099 | red          | 168.68194 | 34.071336 | 0.9865154 | 0.0018759  | 21.608  |
| gi 194042486 ref XM_001927572.1   | salmon       | 168.24574 | 10.894962 | 0.679436  | 0.20707769 | 27.318  |
| gnl UG Ssc#S23772402              | red          | 168.22574 | 35.019154 | 0.9970139 | 0.0001958  | 87.652  |
| gnl UG Ssc#S6009554               | tan          | 168.16149 | 41.470164 | 0.9706342 | 0.00601415 | 10.58   |
| gi 194034220 ref XM_001928748.1   | navy         | 167.17854 | 34.037486 | 0.8798863 | 0.04906128 | 33.068  |
| gi 194040939 ref XM_001924716.1   | darkmagent   | 167.09799 | 8.9770393 | 0.8564873 | 0.06383994 | 62.394  |
| gi 194033502 ref XM_001926129.1   | pink         | 166.78875 | 18.48912  | -0.801603 | 0.10286593 | 29.226  |
| gi 194034959 ref XM_001927036.1   | tan          | 166.78641 | 35.35966  | 0.9274138 | 0.02321823 | 413.974 |
| gnl UG Ssc#S18262171              | navy         | 166.73569 | 16.307454 | -0.561155 | 0.32502132 | 11.008  |
| gnl UG Ssc#S26733681              | sienna3      | 166.66688 | 15.865067 | 0.9567953 | 0.01071014 | 23.25   |
| gnl UG Ssc#S17514217              | yellow       | 166.62817 | 45.934535 | 0.8512915 | 0.06728291 | 19.2    |
| gnl UG Ssc#S23767637              | yellow       | 166.49763 | 33.377472 | 0.7400582 | 0.15273688 | 51.076  |
| gi 194037874 ref XM_001925758.1   | lightcyan    | 166.47397 | 29.601505 | 0.926443  | 0.02368202 | 9.462   |
| gnl UG Ssc#S40406739              | darkgreen    | 166.20857 | 6.1713855 | 0.8752819 | 0.05187186 | 39.55   |
| gi 35384837 gb AY374470.1         | darkmagent   | 166.15761 | 13.137367 | 0.9447363 | 0.01546536 | 21.354  |
| gnl UG Ssc#S40443068              | pink         | 165.84372 | 17.545706 | -0.816779 | 0.09151382 | 166.136 |
| gnl UG Ssc#S18550127              | pink         | 165.82193 | 16.827211 | -0.892016 | 0.04189948 | 68.988  |
| gi 51592110 ref NM_001004031.1    | lightgreen   | 165.54219 | 18.21239  | 0.865478  | 0.05801769 | 59.232  |
| gi 115555188 dbj AK233803.1       | turquoise    | 165.45351 | 140.42814 | 0.5631927 | 0.32287528 | 13.502  |
| gi 47522915 ref NM_214050.1       | sienna3      | 165.35654 | 16.187313 | 0.9623663 | 0.0087143  | 10.77   |
| gi 115546241 dbj AK240479.1       | darkgrey     | 165.33315 | 6.2424651 | 0.5172832 | 0.3720563  | 94.782  |
| gnl UG Ssc#S18274130              | tan          | 165.24651 | 33.919894 | 0.9259404 | 0.02392333 | 13.17   |
| gi 115549970 dbj AK232205.1       | greenyellow  | 165.2133  | 23.598242 | 0.8423785 | 0.07331838 | 13.668  |
| gnl UG Ssc#S22314469              | red          | 165.04384 | 28.294258 | 0.8586201 | 0.06244307 | 11.05   |
| gi 194040784 ref XM_001927731.1   | grey         | 165.02823 | 10.939476 | 0.8036603 | 0.10130316 | 34.342  |
| gi 115552057 dbj AK239250.1       | lightcyan    | 164.71218 | 31.055155 | 0.9398947 | 0.01752864 | 22.17   |



|                                 |              |           |           |           |            |         |
|---------------------------------|--------------|-----------|-----------|-----------|------------|---------|
| gnl UG Ssc#S16513921            | magenta      | 164.62703 | 22.572171 | 0.8995841 | 0.03761711 | 11.83   |
| gi 187672044 gb EU650276.1      | red          | 164.48272 | 31.350801 | 0.8909579 | 0.04251    | 9.384   |
| gnl UG Ssc#S40008864            | darkgreen    | 164.42626 | 16.475289 | 0.8893102 | 0.04346601 | 7.188   |
| gnl UG Ssc#S17518795            | turquoise    | 164.37745 | 129.5381  | 0.5227932 | 0.36606402 | 42.836  |
| gi 157427714 ref NM_001105294.1 | sienna3      | 164.3751  | 16.13127  | 0.9607609 | 0.00927555 | 29.106  |
| gi 51592104 ref NM_001004027.1  | yellow       | 164.34807 | 39.947467 | 0.8135911 | 0.09386456 | 18.744  |
| gnl UG Ssc#S19545599            | yellow       | 164.33432 | 33.75355  | 0.7760057 | 0.12289394 | 26.442  |
| gnl UG Ssc#S22288091            | lightcyan    | 163.78207 | 27.728914 | 0.9089351 | 0.03253399 | 9.364   |
| gi 115546712 dbj AK237558.1     | red          | 163.58204 | 28.008705 | 0.7953924 | 0.1076259  | 173.392 |
| gnl UG Ssc#S29990179            | navy         | 163.37231 | 40.754664 | 0.9571472 | 0.01058013 | 30.374  |
| gnl UG Ssc#S26715792            | midnightblu  | 163.35577 | 21.842421 | 0.85917   | 0.06208448 | 33.734  |
| gnl UG Ssc#S19544906            | pink         | 163.34342 | 17.754097 | -0.819754 | 0.08933614 | 37.514  |
| gi 115552412 dbj AK236417.1     | lightcyan    | 163.33875 | 27.491698 | 0.9034531 | 0.0354854  | 11.552  |
| gnl UG Ssc#S26404602            | yellow       | 163.28461 | 38.654998 | 0.8216432 | 0.08796184 | 7.006   |
| gnl UG Ssc#S18552383            | turquoise    | 163.2763  | 105.28781 | 0.4630118 | 0.43227411 | 26.184  |
| gnl UG Ssc#S40054185            | lightgreen   | 163.03339 | 20.822129 | 0.8999639 | 0.03740612 | 61.028  |
| gnl UG Ssc#S40367565            | yellow       | 163.01133 | 50.219287 | 0.8837848 | 0.04672064 | 15.834  |
| gnl UG Ssc#S35324071            | darkmagent   | 163.00656 | 11.944226 | 0.9231135 | 0.02529508 | 3.978   |
| gnl UG Ssc#S17517764            | yellow       | 162.94235 | 18.205685 | 0.4906009 | 0.40139836 | 3.204   |
| gnl UG Ssc#S26728677            | turquoise    | 162.46873 | 110.64541 | 0.518596  | 0.37062647 | 10.032  |
| gnl UG Ssc#S34530397            | red          | 162.13184 | 25.934485 | 0.8624108 | 0.05998432 | 23.71   |
| gi 52351277 gb AY609709.1       | grey60       | 161.87237 | 13.450919 | 0.6048372 | 0.27984103 | 45.64   |
| gnl UG Ssc#S19540474            | brown        | 161.83406 | 53.503946 | 0.8326834 | 0.08006285 | 8.83    |
| gnl UG Ssc#S23763649            | red          | 161.54378 | 34.005077 | 0.9333039 | 0.02046875 | 21.3    |
| gnl UG Ssc#S19543384            | lightgreen   | 161.44954 | 21.39004  | 0.9180511 | 0.02781231 | 35.286  |
| gnl UG Ssc#S40327511            | red          | 161.01092 | 26.146907 | 0.7864072 | 0.11462658 | 48.91   |
| gnl UG Ssc#S18549419            | lightcyan    | 160.90818 | 28.929151 | 0.920952  | 0.02636043 | 11.13   |
| gi 115548360 dbj AK231733.1     | navy         | 160.79983 | 35.621145 | 0.9538221 | 0.01182915 | 24.714  |
| gi 47523847 ref NM_214397.1     | royalblue    | 160.76985 | 21.11567  | 0.9515232 | 0.01271895 | 43.442  |
| gi 115554309 dbj AK240104.1     | violet       | 160.6887  | 17.504514 | 0.9503044 | 0.01319918 | 10.496  |
| gnl UG Ssc#S34529832            | turquoise    | 160.5508  | 95.703126 | 0.4694848 | 0.42498312 | 3.966   |
| gi 52351225 gb AY609657.1       | navy         | 160.25903 | 15.499222 | -0.461851 | 0.43358492 | 23.742  |
| gnl UG Ssc#S40205238            | pink         | 160.02302 | 23.194591 | 0.9581888 | 0.01019837 | 12.948  |
| gi 194036101 ref XM_001929371.1 | magenta      | 159.97459 | 13.741746 | 0.2091895 | 0.73560724 | 34.922  |
| gnl UG Ssc#S18550295            | paleturquois | 159.92643 | 13.195782 | 0.9078663 | 0.03310294 | 10.792  |
| gi 194038225 ref XM_001926546.1 | lightgreen   | 159.87236 | 20.028859 | 0.8997972 | 0.03749865 | 56.846  |
| gi 115548454 dbj AK235071.1     | yellow       | 159.47414 | 22.033794 | 0.5625017 | 0.32360246 | 28.572  |
| gnl UG Ssc#S5999567             | yellow       | 159.45995 | 42.741221 | 0.8398713 | 0.07504491 | 7.672   |
| gnl UG Ssc#S40390861            | yellow       | 159.44692 | 45.610156 | 0.87212   | 0.05383028 | 128.578 |
| gi 52351639 gb AY610069.1       | brown        | 158.98105 | 48.182517 | 0.8110041 | 0.09578564 | 13.468  |
| gnl UG Ssc#S40146297            | greenyellow  | 158.97616 | 21.303304 | 0.8163243 | 0.09184782 | 12.748  |
| gnl UG Ssc#S26722585            | pink         | 158.94867 | 22.441823 | 0.890552  | 0.04274489 | 5.702   |
| gi 115551122 dbj AK232555.1     | yellow       | 158.92258 | 27.110188 | 0.6699207 | 0.21601996 | 27.402  |
| gnl UG Ssc#S17525768            | darkgrey     | 158.71363 | 13.76033  | 0.9382967 | 0.01822784 | 11.212  |
| gnl UG Ssc#S40055820            | darkgreen    | 158.68717 | 15.592619 | 0.8965654 | 0.03930765 | 2.532   |
| gnl UG Ssc#S18383368            | tan          | 158.53552 | 38.866689 | 0.9542965 | 0.01164818 | 3.882   |
| gnl UG Ssc#S19542684            | navy         | 158.31805 | 36.731228 | 0.906408  | 0.03388433 | 93.094  |
| gnl UG Ssc#S29987248            | skyblue      | 157.97248 | 16.703641 | 0.8920645 | 0.04187175 | 7.928   |

|                                 |            |           |           |           |            |          |
|---------------------------------|------------|-----------|-----------|-----------|------------|----------|
| gi 178056483 ref NM_001123101.1 | darkmagent | 157.62258 | 15.528443 | 0.9898281 | 0.00122962 | 26.608   |
| gnl UG Ssc#S23759685            | navy       | 157.52541 | 15.331862 | -0.440928 | 0.45735595 | 2.94     |
| gnl UG Ssc#S19545759            | pink       | 157.24458 | 18.867416 | 0.6827149 | 0.20402076 | 9.438    |
| gnl UG Ssc#S40349544            | lightcyan  | 157.23158 | 25.462361 | 0.8951104 | 0.04013091 | 192.828  |
| gnl UG Ssc#S18291801            | navy       | 157.21735 | 39.352058 | 0.9674453 | 0.00701654 | 11.278   |
| gi 115554233 dbj AK240028.1     | violet     | 157.14043 | 12.675955 | -0.917166 | 0.02826009 | 2.738    |
| gnl UG Ssc#S18356019            | red        | 157.01483 | 32.594312 | 0.9671606 | 0.00710847 | 10.112   |
| gnl UG Ssc#S40180694            | magenta    | 156.84563 | 16.995382 | 0.7981237 | 0.10552442 | 15.072   |
| gnl UG Ssc#S35325248            | navy       | 156.70664 | 36.880778 | 0.9631936 | 0.00842961 | 22.296   |
| gnl UG Ssc#S23763174            | sienna3    | 156.63855 | 15.939094 | 0.9588947 | 0.00994225 | 13.87    |
| gnl UG Ssc#S17516064            | magenta    | 156.62403 | 10.711862 | 0.589484  | 0.29552081 | 30.766   |
| gi 194036068 ref XM_001926844.1 | lightcyan  | 156.56164 | 25.364494 | 0.8897704 | 0.04319832 | 63.29    |
| gi 115547198 dbj AK234571.1     | blue       | 156.49053 | 87.694106 | 0.8143389 | 0.09331142 | 11.354   |
| gnl UG Ssc#S40291735            | navy       | 156.32851 | 40.235233 | 0.9673121 | 0.00705951 | 11.19    |
| gnl UG Ssc#S29982058            | navy       | 156.30629 | 35.829449 | 0.9896729 | 0.00125785 | 18.65    |
| gi 115549177 dbj AK231853.1     | royalblue  | 156.27985 | 15.770119 | 0.9134758 | 0.03015238 | 11.384   |
| gnl UG Ssc#S17514632            | navy       | 156.10074 | 35.103254 | 0.8909352 | 0.04252313 | 36.276   |
| gnl UG Ssc#S23767117            | magenta    | 155.98087 | 7.7971781 | 0.4269243 | 0.47341931 | 4.784    |
| gnl UG Ssc#S40100454            | brown      | 155.97481 | 40.16546  | 0.7763448 | 0.12262173 | 12.68    |
| gi 194041741 ref XM_001928824.1 | red        | 155.66924 | 28.313833 | 0.7864574 | 0.11458712 | 14.572   |
| gnl UG Ssc#S40106217            | red        | 155.63987 | 35.070613 | 0.9952035 | 0.00039848 | 11.25    |
| gi 194036992 ref XM_001928798.1 | violet     | 155.6348  | 16.883753 | 0.9311886 | 0.02144324 | 9.572    |
| gnl UG Ssc#S6013604             | blue       | 155.52547 | 78.662988 | 0.7899148 | 0.11187793 | 4.126    |
| gi 194042865 ref XM_001925507.1 | royalblue  | 155.5033  | 18.62592  | 0.9168711 | 0.02841    | 24.508   |
| gi 115555020 dbj AK240219.1     | magenta    | 155.42184 | 4.904854  | 0.4140633 | 0.48827618 | 45.158   |
| gi 148222590 ref NM_001097486.1 | royalblue  | 155.28353 | 20.190171 | 0.9354435 | 0.01949813 | 17.568   |
| gi 115551176 dbj AK232609.1     | violet     | 155.11453 | 9.6275023 | 0.5515273 | 0.33520702 | 20.536   |
| gi 115549258 dbj AK235178.1     | navy       | 155.06616 | 30.309001 | 0.8784248 | 0.04994803 | 94.478   |
| gi 194035424 ref XM_001926628.1 | navy       | 155.03134 | 16.983305 | -0.556428 | 0.33001239 | 45.6     |
| gnl UG Ssc#S26735315            | red        | 154.98299 | 28.601939 | 0.8272711 | 0.08390666 | 6.114    |
| gi 52351978 gb AY610394.1       | royalblue  | 154.98156 | 20.054774 | 0.9312617 | 0.0214093  | 96.522   |
| gnl UG Ssc#S31129394            | yellow     | 154.8066  | 49.759249 | 0.8939391 | 0.04079753 | 198.172  |
| gnl UG Ssc#S23695759            | yellow     | 154.35643 | 39.822957 | 0.8040534 | 0.10100549 | 33.946   |
| gnl UG Ssc#S39951768            | red        | 154.24701 | 31.012818 | 0.8940568 | 0.0407304  | 41.04    |
| gi 198282078 ref NM_001134823.1 | tan        | 154.24248 | 37.099108 | 0.942734  | 0.01630847 | 1589.518 |
| gi 194036350 ref XM_001926399.1 | yellow     | 154.07859 | 43.040252 | 0.8377794 | 0.07649485 | 12.4     |
| gnl UG Ssc#S18380107            | navy       | 153.85067 | 37.929187 | 0.9197016 | 0.02698317 | 21.132   |
| gnl UG Ssc#S26723763            | darkmagent | 153.5934  | 16.074577 | 0.9952434 | 0.00039352 | 22.38    |
| gnl UG Ssc#S40482663            | magenta    | 153.57992 | 11.842283 | 0.0433571 | 0.94481329 | 9.268    |
| gi 158262678 ref NM_001109946.1 | pink       | 153.28398 | 22.343944 | 0.9754676 | 0.00459557 | 7.52     |
| gnl UG Ssc#S40175618            | royalblue  | 153.21772 | 22.443651 | 0.9728794 | 0.0053396  | 3.508    |
| gi 194036295 ref XM_001926489.1 | darkgrey   | 152.84199 | 13.13099  | 0.899569  | 0.03762549 | 34.484   |
| gi 194036270 ref XM_001929667.1 | navy       | 152.83561 | 35.966152 | 0.8974145 | 0.03882975 | 51.712   |
| gnl UG Ssc#S23694970            | lightgreen | 152.71114 | 14.193302 | 0.7795241 | 0.1200782  | 56.806   |
| gnl UG Ssc#S19542749            | royalblue  | 152.66073 | 22.496297 | 0.9911971 | 0.00099015 | 69.196   |
| gi 115547369 dbj AK234742.1     | darkgreen  | 152.55689 | 6.0157183 | 0.8073249 | 0.09853813 | 20.426   |
| gi 115551374 dbj AK236052.1     | yellow     | 152.28013 | 18.15065  | 0.4769844 | 0.41657127 | 89.27    |
| gi 115553967 dbj AK233176.1     | navy       | 152.24621 | 34.012352 | 0.9693441 | 0.00641353 | 50.592   |

|                                 |              |           |           |           |            |          |
|---------------------------------|--------------|-----------|-----------|-----------|------------|----------|
| gnl UG Ssc#S17499681            | royalblue    | 152.06684 | 21.168986 | 0.9540377 | 0.01174682 | 150.068  |
| gi 115550656 dbj AK232486.1     | navy         | 151.86453 | 27.145518 | 0.8764231 | 0.05117068 | 23.734   |
| gi 115548136 dbj AK238120.1     | navy         | 151.74007 | 16.08703  | -0.400477 | 0.50407455 | 0.974    |
| gi 52351682 gb AY610112.1       | grey         | 151.43946 | 11.46641  | 0.8669562 | 0.05707729 | 21.064   |
| gi 194036737 ref XM_001927243.1 | magenta      | 151.27254 | 13.513391 | 0.6684221 | 0.21743788 | 50.968   |
| gi 194042725 ref XM_001925659.1 | violet       | 151.17237 | 13.416626 | -0.915256 | 0.02923453 | 27.22    |
| gi 194042819 ref XM_001928170.1 | navy         | 150.95629 | 40.088253 | 0.9728912 | 0.00533612 | 26.894   |
| gi 84619523 ref NM_001038694.1  | brown        | 150.90219 | 49.657787 | 0.816719  | 0.09155763 | 13.34    |
| gi 178056676 ref NM_001123078.1 | pink         | 150.79968 | 23.65828  | 0.8220275 | 0.08768306 | 191.35   |
| gnl UG Ssc#S17525410            | violet       | 150.75093 | 14.890521 | 0.9862519 | 0.00193109 | 22.47    |
| gi 194035479 ref XM_001924978.1 | paleturquois | 150.63435 | 16.819365 | 0.9963214 | 0.00026768 | 18.376   |
| gi 115553202 dbj AK233000.1     | navy         | 150.62704 | 39.379565 | 0.9591569 | 0.00984765 | 73.798   |
| gnl UG Ssc#S18550520            | darkmagent   | 150.51586 | 13.190022 | 0.9527123 | 0.01225608 | 40.048   |
| gnl UG Ssc#S18380006            | lightcyan    | 150.2819  | 24.588345 | 0.8820029 | 0.04778602 | 57.176   |
| gnl UG Ssc#S35323260            | red          | 150.13926 | 29.535486 | 0.8606662 | 0.06111208 | 13.976   |
| gnl UG Ssc#S40288024            | pink         | 149.98575 | 13.730172 | 0.9553845 | 0.01123658 | 12.448   |
| gi 115548140 dbj AK238124.1     | lightcyan    | 149.92296 | 26.510858 | 0.9090535 | 0.03247115 | 10.012   |
| gi 194037707 ref XM_001924251.1 | darkgreen    | 149.67678 | 6.4100703 | 0.830551  | 0.08157062 | 7.638    |
| gi 194043959 ref XM_001927448.1 | lightcyan    | 149.62876 | 23.729225 | 0.8728975 | 0.0533466  | 44.288   |
| gnl UG Ssc#S18546252            | lightgreen   | 149.511   | 13.584533 | 0.7667954 | 0.13035622 | 26.042   |
| gnl UG Ssc#S19539691            | royalblue    | 149.51034 | 14.969642 | 0.913138  | 0.03032756 | 23.814   |
| gi 115550124 dbj AK235603.1     | violet       | 149.42698 | 16.685508 | 0.9205402 | 0.02656502 | 144.472  |
| gi 194036658 ref XM_001926004.1 | orange       | 149.17445 | 6.2049955 | 0.6828993 | 0.20384925 | 30.742   |
| gnl UG Ssc#S26728925            | pink         | 148.99045 | 8.0427655 | 0.089726  | 0.88591085 | 10.51    |
| gnl UG Ssc#S19542771            | tan          | 148.7332  | 35.597434 | 0.9313955 | 0.02134726 | 27.482   |
| gi 52351064 gb AY609469.1       | navy         | 148.68222 | 36.610803 | 0.9271378 | 0.0233498  | 10.076   |
| gnl UG Ssc#S23689699            | paleturquois | 148.55095 | 16.399822 | 0.9805839 | 0.00323824 | 7.204    |
| gnl UG Ssc#S38481918            | grey60       | 148.51774 | 12.392541 | 0.5821086 | 0.30313155 | 39.374   |
| gnl UG Ssc#S40171668            | paleturquois | 148.51446 | 14.450718 | 0.9308349 | 0.0216076  | 37.444   |
| gnl UG Ssc#S26403713            | navy         | 148.28622 | 17.056558 | -0.558428 | 0.32789824 | 16.016   |
| gnl UG Ssc#S40184013            | lightcyan    | 147.83866 | 24.714043 | 0.8837977 | 0.04671295 | 99.746   |
| gi 115546260 dbj AK240498.1     | yellow       | 147.64248 | 31.78501  | 0.7041727 | 0.18433716 | 30.354   |
| gnl UG Ssc#S23758881            | royalblue    | 147.63075 | 19.575636 | 0.9451963 | 0.01527375 | 47.948   |
| gnl UG Ssc#S16764113            | skyblue      | 147.19392 | 9.7214406 | 0.7807436 | 0.11910679 | 63.736   |
| gnl UG Ssc#S35336616            | violet       | 147.18226 | 12.655607 | -0.895454 | 0.03993585 | 5.748    |
| gi 72535201 ref NM_001031794.1  | red          | 147.18094 | 35.333068 | 0.9542351 | 0.01167155 | 1398.636 |
| gi 194033632 ref XM_001927932.1 | pink         | 147.08001 | 21.838779 | 0.8544234 | 0.06520083 | 9.964    |
| gnl UG Ssc#S17514318            | royalblue    | 147.06798 | 20.467027 | 0.9823131 | 0.00281615 | 34.012   |
| gi 52351540 gb AY609970.1       | navy         | 147.02022 | 16.84669  | -0.593469 | 0.29143003 | 7.206    |
| gnl UG Ssc#S18284670            | red          | 146.68727 | 33.340285 | 0.9824626 | 0.00278057 | 8.538    |
| gnl UG Ssc#S23761814            | red          | 146.68225 | 34.485638 | 0.9883113 | 0.00151432 | 25.108   |
| gnl UG Ssc#S39833392            | magenta      | 146.42276 | 20.380866 | 0.8259371 | 0.0848625  | 15.678   |
| gi 92020093 dbj AB237777.1      | darkgreen    | 146.38725 | 2.9338055 | 0.4936136 | 0.39805911 | 18.948   |
| gi 115546695 dbj AK234533.1     | navy         | 145.85136 | 16.15178  | -0.345204 | 0.56936464 | 76.82    |
| gi 153792026 ref NM_001099932.1 | royalblue    | 145.85109 | 20.681336 | 0.9473208 | 0.01439896 | 338.326  |
| gi 115555653 dbj AK237286.1     | turquoise    | 145.81539 | 120.39307 | 0.5179051 | 0.37137871 | 85.946   |
| gi 194037346 ref XM_001924466.1 | navy         | 145.56987 | 33.547985 | 0.8977857 | 0.03862142 | 21.152   |
| gnl UG Ssc#S18555925            | magenta      | 145.25367 | 15.235133 | 0.6607065 | 0.2247785  | 10.822   |

|                                   |              |           |           |           |            |         |
|-----------------------------------|--------------|-----------|-----------|-----------|------------|---------|
| gnl UG Ssc#S40262955              | sienna3      | 145.104   | 12.99711  | 0.9194024 | 0.02713289 | 3.106   |
| gi 115546838 dbj AK237684.1       | royalblue    | 145.04434 | 21.134986 | 0.9719705 | 0.00560949 | 74.116  |
| gi 115546460 dbj AK230979.1       | grey60       | 144.93656 | 6.948366  | 0.2990224 | 0.6250253  | 24.852  |
| gi 115548849 dbj AK235252.1       | lightgreen   | 144.84898 | 16.764356 | 0.8504915 | 0.067818   | 14.562  |
| gnl UG Ssc#S35331631              | navy         | 144.59453 | 35.523911 | 0.980609  | 0.00323198 | 6.37    |
| gnl UG Ssc#S40386137              | violet       | 144.56924 | 16.367837 | 0.9828407 | 0.00269129 | 7.156   |
| gi 115554124 dbj AK233334.1       | darkmagent   | 143.76638 | 14.988227 | 0.9746571 | 0.0048246  | 73.648  |
| gi 115550108 dbj AK235587.1       | grey60       | 143.67525 | 6.0866822 | 0.1667357 | 0.78869327 | 12.828  |
| gi 194033910 ref XM_001928928.1   | turquoise    | 143.36413 | 88.847313 | 0.4431455 | 0.45482299 | 40.406  |
| gi 194037185 ref XM_001929112.1   | darkmagent   | 143.24999 | 14.865916 | 0.9720444 | 0.00558736 | 15.082  |
| gnl UG Ssc#S23768212              | salmon       | 143.08814 | 20.285021 | 0.8045426 | 0.10063537 | 171.268 |
| gnl UG Ssc#S18282034              | midnightblu  | 142.99589 | 16.5788   | 0.7988796 | 0.104945   | 24.404  |
| gi 37050908 emb AJ583708.1        | yellow       | 142.72432 | 41.66239  | 0.8431569 | 0.07278488 | 10.196  |
| gi 194035832 ref XM_001928786.1   | royalblue    | 142.6728  | 17.532269 | 0.895542  | 0.0398861  | 38.628  |
| gnl UG Ssc#S31121510              | tan          | 142.18794 | 13.144338 | 0.7067967 | 0.18196931 | 32.112  |
| gnl UG Ssc#S18273087              | violet       | 141.73324 | 14.408573 | -0.910035 | 0.03195164 | 5.276   |
| gi 115551966 dbj AK239159.1       | paleturquois | 141.48919 | 12.92147  | 0.895635  | 0.03983347 | 31.702  |
| gnl UG Ssc#S18557979              | paleturquois | 141.1487  | 14.871827 | 0.9440745 | 0.01574241 | 23.066  |
| gi 194043177 ref XM_001928608.1   | pink         | 140.93917 | 20.267977 | 0.708399  | 0.18052781 | 5.912   |
| gnl UG Ssc#S18358120              | lightgreen   | 140.86197 | 10.228847 | 0.7382065 | 0.15432491 | 47.204  |
| gnl UG Ssc#S18378555              | navy         | 140.65537 | 14.699696 | -0.320521 | 0.59899907 | 21.13   |
| gi 115554372 dbj AK233382.1       | magenta      | 140.30118 | 18.962016 | 0.7918573 | 0.11036435 | 48.008  |
| gnl UG Ssc#S34517367              | lightgreen   | 140.20923 | 10.398274 | 0.6918064 | 0.19561218 | 120.184 |
| gi 115553549 dbj AK236752.1       | navy         | 140.07453 | 35.491906 | 0.9219489 | 0.02586731 | 47.958  |
| gi 115552242 dbj AK230551.1       | midnightblu  | 139.97482 | 17.979942 | 0.8143203 | 0.09332517 | 16.868  |
| gnl UG Ssc#S18378791              | darkgreen    | 139.46361 | 5.1814243 | 0.777147  | 0.12197847 | 59.824  |
| gi 84490432 ref NM_001038631.1    | magenta      | 139.37174 | 20.594344 | 0.8530905 | 0.06608442 | 4.18    |
| gi 15824733 gb AF329358.1 AF32935 | pink         | 139.14927 | 21.160865 | 0.7376789 | 0.15477829 | 14.51   |
| gi 118403911 ref NM_001078662.1   | pink         | 139.00273 | 22.33268  | 0.9469359 | 0.0145562  | 76.34   |
| gnl UG Ssc#S17513253              | darkgreen    | 138.91302 | 12.202411 | 0.878933  | 0.04963914 | 40.784  |
| gnl UG Ssc#S40288641              | grey60       | 138.88312 | 13.328981 | 0.6506206 | 0.23447452 | 6.23    |
| gi 115553453 dbj AK236656.1       | red          | 138.7495  | 33.277341 | 0.8815743 | 0.04804337 | 30.098  |
| gnl UG Ssc#S17527438              | violet       | 138.72137 | 16.832675 | 0.940525  | 0.0172553  | 32.398  |
| gi 52350674 gb AY609390.1         | skyblue3     | 138.69793 | 8.2805525 | 0.840135  | 0.07486268 | 20.502  |
| gnl UG Ssc#S40073180              | darkmagent   | 138.50856 | 12.031913 | 0.9208418 | 0.02641514 | 24.756  |
| gi 74136760 ref NM_001033014.1    | pink         | 138.36945 | 9.7551119 | 0.2583138 | 0.67479975 | 35.072  |
| gnl UG Ssc#S22311415              | midnightblu  | 137.94359 | 14.794755 | 0.7716283 | 0.12642421 | 21.952  |
| gi 115551900 dbj AK236307.1       | darkgrey     | 137.86485 | 13.83439  | 0.9531961 | 0.01206936 | 4.75    |
| gnl UG Ssc#S26722922              | navy         | 137.70671 | 22.250419 | 0.782106  | 0.11802437 | 13.494  |
| gi 47523737 ref NM_214339.1       | red          | 137.70626 | 26.630645 | 0.7632533 | 0.13326062 | 52.366  |
| gi 194037555 ref XM_001929413.1   | darkmagent   | 137.56659 | 14.608523 | 0.9681761 | 0.00678234 | 119.636 |
| gnl UG Ssc#S26721025              | orange       | 137.56603 | 7.3732789 | 0.5912471 | 0.29370891 | 38.632  |
| gnl UG Ssc#S18549874              | pink         | 137.46853 | 11.235974 | 0.499362  | 0.39170588 | 1.414   |
| gnl UG Ssc#S26646909              | grey60       | 137.36592 | 14.429878 | 0.6482478 | 0.23677189 | 12.52   |
| gnl UG Ssc#S39984272              | darkgrey     | 137.32957 | 5.6581276 | 0.3372869 | 0.57884039 | 11.818  |
| gi 115551173 dbj AK232606.1       | paleturquois | 137.31916 | 16.35927  | 0.9850715 | 0.00218466 | 33.35   |
| gi 115551482 dbj AK236160.1       | turquoise    | 137.2365  | 103.19362 | 0.5176487 | 0.371658   | 60.764  |
| gnl UG Ssc#S26711451              | violet       | 137.17116 | 14.316216 | -0.907461 | 0.03331976 | 18.72   |

|                                 |              |           |           |           |            |         |
|---------------------------------|--------------|-----------|-----------|-----------|------------|---------|
| gnl UG Ssc#S18550002            | magenta      | 137.09799 | 10.868288 | 0.3773465 | 0.5312063  | 27.496  |
| gi 47522919 ref NM_214052.1     | darkgreen    | 137.05236 | 15.156782 | 0.8033302 | 0.1015534  | 4.7     |
| gi 115548574 dbj AK231558.1     | pink         | 136.99735 | 19.540795 | 0.7549239 | 0.14016449 | 202.522 |
| gnl UG Ssc#S18546502            | pink         | 136.94342 | 23.03909  | 0.8648781 | 0.05840076 | 13.984  |
| gnl UG Ssc#S19545689            | orange       | 136.89655 | 7.2436014 | 0.7689398 | 0.12860718 | 6.87    |
| gi 194040788 ref XM_001925300.1 | red          | 136.76983 | 16.514658 | 0.4957568 | 0.3956876  | 36.458  |
| gnl UG Ssc#S23689938            | pink         | 136.28012 | 17.885067 | 0.9825129 | 0.00276865 | 11.132  |
| gnl UG Ssc#S23771071            | magenta      | 136.23205 | 11.4403   | 0.4913081 | 0.400614   | 3.416   |
| gi 115551644 dbj AK239108.1     | paleturquois | 136.08339 | 15.725512 | 0.9725015 | 0.00545128 | 8.524   |
| gnl UG Ssc#S26715181            | red          | 136.07568 | 12.450627 | 0.3729595 | 0.53638404 | 4.282   |
| gnl UG Ssc#S16763004            | royalblue    | 136.01521 | 15.530682 | 0.9143681 | 0.02969127 | 11.156  |
| gi 194041914 ref XM_001928393.1 | navy         | 135.89997 | 29.885687 | 0.8445305 | 0.07184644 | 43.99   |
| gnl UG Ssc#S18555802            | darkgrey     | 135.82353 | 5.8457336 | 0.4280296 | 0.47214699 | 11.07   |
| gnl UG Ssc#S19547820            | red          | 135.62765 | 25.861501 | 0.7709558 | 0.12696922 | 11.03   |
| gnl UG Ssc#S18358279            | darkgreen    | 135.62273 | 5.0790818 | 0.7497391 | 0.14451342 | 39.158  |
| gi 194039587 ref XM_001929390.1 | magenta      | 135.00275 | 17.329587 | 0.7752919 | 0.12346763 | 36.698  |
| gi 194033956 ref XM_001926015.1 | royalblue    | 134.94293 | 21.473066 | 0.9831219 | 0.00262552 | 20.346  |
| gi 115554315 dbj AK240110.1     | turquoise    | 134.66635 | 86.971257 | 0.4376954 | 0.46105289 | 28.588  |
| gnl UG Ssc#S19548276            | darkmagent   | 134.44201 | 11.404686 | 0.9080394 | 0.03301059 | 7.01    |
| gi 194036122 ref XM_001929505.1 | orange       | 134.41085 | 6.2227982 | 0.6864352 | 0.20056795 | 16.364  |
| gi 194036768 ref XM_001927459.1 | royalblue    | 134.23942 | 18.299796 | 0.9475657 | 0.01429918 | 7.442   |
| gi 194041270 ref XM_001926989.1 | grey60       | 134.2055  | 10.055254 | 0.6993891 | 0.18867609 | 25.574  |
| gnl UG Ssc#S35171904            | tan          | 134.16767 | 30.621044 | 0.8964631 | 0.03936537 | 177.212 |
| gnl UG Ssc#S23701117            | navy         | 133.92465 | 17.856953 | -0.489408 | 0.40272273 | 121.558 |
| gnl UG Ssc#S40288802            | red          | 133.80842 | 34.861959 | 0.9418013 | 0.01670615 | 183.3   |
| gi 47523665 ref NM_214304.1     | violet       | 133.76098 | 11.330348 | -0.846117 | 0.07076757 | 38.494  |
| gnl UG Ssc#S5993568             | magenta      | 133.5199  | 12.724837 | 0.6396908 | 0.24510714 | 1.324   |
| gnl UG Ssc#S23695768            | paleturquois | 133.33652 | 12.656969 | 0.9348866 | 0.01974929 | 7.898   |
| gi 113205555 ref NM_001044525.1 | darkgreen    | 133.04633 | 4.1655955 | 0.6274672 | 0.25714815 | 12.534  |
| gi 115552176 dbj AK230485.1     | tan          | 133.02038 | 29.133429 | 0.8931474 | 0.04125013 | 17.972  |
| gi 115549693 dbj AK231972.1     | magenta      | 132.74368 | 15.571722 | 0.6779194 | 0.20849583 | 48.542  |
| gi 194036879 ref XM_001927666.1 | darkmagent   | 132.52954 | 11.34978  | 0.9052091 | 0.03453108 | 93.168  |
| gnl UG Ssc#S39885581            | paleturquois | 132.44463 | 14.438806 | 0.943632  | 0.01592854 | 2.882   |
| gi 194044905 ref XM_001926512.1 | red          | 132.33689 | 19.222516 | 0.6053953 | 0.27927538 | 10.03   |
| gnl UG Ssc#S6077174             | skyblue      | 131.95096 | 6.1693038 | 0.6907414 | 0.19659203 | 10.088  |
| gnl UG Ssc#S26400047            | pink         | 131.63783 | 16.928189 | 0.8124034 | 0.09474502 | 13.59   |
| gi 115547946 dbj AK234923.1     | paleturquois | 131.55365 | 13.180702 | 0.9091633 | 0.0324129  | 33.1    |
| gi 47522635 ref NM_213927.1     | navy         | 131.40538 | 29.399676 | 0.8761803 | 0.05131964 | 36.626  |
| gnl UG Ssc#S31114330            | pink         | 131.17927 | 15.580256 | 0.9631285 | 0.00845188 | 3.942   |
| gi 113205761 ref NM_001044578.1 | pink         | 131.08261 | 17.41235  | 0.9028143 | 0.03583461 | 47.838  |
| gi 115550292 dbj AK235771.1     | yellow       | 131.05353 | 20.529827 | 0.5105642 | 0.37939493 | 57.986  |
| gnl UG Ssc#S22287912            | grey60       | 130.87871 | 10.352679 | 0.7863953 | 0.11463593 | 16.016  |
| gnl UG Ssc#S23755031            | magenta      | 130.53505 | 15.53912  | 0.7352271 | 0.15689014 | 13.556  |
| gnl UG Ssc#S17513789            | royalblue    | 130.48028 | 19.747204 | 0.972818  | 0.00535769 | 32.228  |
| gnl UG Ssc#S18551520            | grey60       | 130.24079 | 10.344998 | 0.5259114 | 0.36268331 | 36.588  |
| gnl UG Ssc#S26734160            | royalblue    | 129.87226 | 0.8746316 | -0.36875  | 0.54136206 | 8.76    |

paleturquois

|                                 |             |           |           |           |            |         |
|---------------------------------|-------------|-----------|-----------|-----------|------------|---------|
| gnl UG Ssc#S40196887            | yellow      | 129.68515 | 21.410271 | 0.5361453 | 0.35164223 | 18.024  |
| gi 194037499 ref XM_001928879.1 | magenta     | 129.64473 | 14.355961 | 0.7356039 | 0.15656502 | 41.482  |
| gnl UG Ssc#S19549310            | yellow      | 129.62571 | 27.705173 | 0.7129469 | 0.17645397 | 16.926  |
| gnl UG Ssc#S6065178             | navy        | 129.12708 | 33.259427 | 0.9548137 | 0.01145191 | 10.422  |
| gnl UG Ssc#S14766801            | orange      | 128.89212 | 6.1762526 | 0.7325233 | 0.15922859 | 2.43    |
| gi 194039709 ref XM_001929236.1 | turquoise   | 128.67533 | 83.269325 | 0.4388273 | 0.45975759 | 40.422  |
| gnl UG Ssc#S18549491            | darkgreen   | 128.65739 | 10.321254 | 0.8292901 | 0.08246627 | 23.224  |
| gnl UG Ssc#S18552627            | turquoise   | 128.10673 | 77.344095 | 0.4384696 | 0.46016678 | 57.126  |
| gnl UG Ssc#S19549286            | magenta     | 127.90898 | 15.644485 | 0.7575338 | 0.13799021 | 4.908   |
| gnl UG Ssc#S35332920            | darkmagent  | 127.56487 | 9.9507428 | 0.8902569 | 0.04291588 | 12.1    |
| gnl UG Ssc#S23698749            | pink        | 127.52768 | 14.848877 | 0.7609421 | 0.13516589 | 9.914   |
| gi 194037944 ref XM_001924408.1 | red         | 127.41055 | 27.719424 | 0.9137402 | 0.03001554 | 25.534  |
| gnl UG Ssc#S18554156            | orange      | 127.14469 | 7.8022267 | 0.6637772 | 0.22184897 | 1.824   |
| gi 194037031 ref XM_001925224.1 | pink        | 127.12096 | 10.749862 | 0.4800848 | 0.41310505 | 16.688  |
| gnl UG Ssc#S16515706            | darkgrey    | 126.87033 | 10.467395 | 0.8893022 | 0.0434707  | 13.296  |
| gi 194038212 ref XM_001927641.1 | turquoise   | 126.83975 | 78.615212 | 0.4089367 | 0.49422532 | 14.182  |
| gnl UG Ssc#S39990281            | magenta     | 126.55809 | 12.195982 | 0.6149517 | 0.26963545 | 4.458   |
| gi 158262680 ref NM_001109947.1 | red         | 126.4389  | 33.70403  | 0.9161177 | 0.02879376 | 84.778  |
| gnl UG Ssc#S17510986            | red         | 126.28131 | 33.41287  | 0.8817248 | 0.04795299 | 323.622 |
| gnl UG Ssc#S40143536            | pink        | 126.21826 | 10.59152  | 0.4202951 | 0.48106508 | 29.604  |
| gi 115546929 dbj AK240575.1     | navy        | 125.60876 | 16.067573 | -0.52206  | 0.36685983 | 29.992  |
| gnl UG Ssc#S40125669            | pink        | 125.28755 | 14.670319 | -0.795023 | 0.10791072 | 2.192   |
| gnl UG Ssc#S23689648            | paleturquoi | 125.26659 | 6.9638758 | 0.7455371 | 0.14806648 | 31.398  |
| gi 194044034 ref XM_001928794.1 | grey60      | 125.08818 | 14.115277 | 0.9073007 | 0.03340533 | 662.266 |
| gi 194042287 ref XM_001927955.1 | royalblue   | 124.28437 | 16.491577 | 0.9396638 | 0.01762913 | 177.722 |
| gi 194040496 ref XM_001928226.1 | navy        | 124.17668 | 32.500936 | 0.9282545 | 0.02281898 | 13.302  |
| gnl UG Ssc#S18555071            | grey60      | 124.14932 | 15.631203 | 0.7798298 | 0.11983449 | 3.524   |
| gnl UG Ssc#S31116246            | magenta     | 123.5808  | 13.078853 | 0.6714222 | 0.21460184 | 1.976   |
| gi 194043399 ref XM_001929569.1 | grey        | 123.10063 | 9.762258  | 0.6965306 | 0.19128257 | 15.776  |
| gnl UG Ssc#S17518379            | pink        | 122.65854 | 12.914813 | 0.6126903 | 0.2719085  | 11.178  |
| gnl UG Ssc#S40486793            | red         | 122.56387 | 26.371472 | 0.7434282 | 0.14985912 | 0.928   |
| gi 52351457 gb AY609887.1       | magenta     | 122.23867 | 11.880437 | 0.603152  | 0.28155113 | 68.726  |
| gi 52351294 gb AY609726.1       | navy        | 121.99241 | 15.606902 | -0.240726 | 0.6964843  | 4.036   |
| gnl UG Ssc#S18279557            | red         | 121.83231 | 17.772581 | 0.4835521 | 0.40923657 | 12.576  |
| gnl UG Ssc#S17513958            | pink        | 121.62676 | 9.9843872 | 0.1205734 | 0.84685394 | 34.548  |
| gi 47522707 ref NM_213889.1     | pink        | 121.58313 | 20.867754 | 0.7754547 | 0.1233367  | 14.306  |
| gi 47522703 ref NM_213891.1     | pink        | 121.37558 | 19.033013 | 0.7285721 | 0.16266393 | 85.104  |
| gnl UG Ssc#S40527391            | navy        | 121.33168 | 11.838578 | 0.6487086 | 0.23632522 | 33.608  |
| gnl UG Ssc#S23689635            | red         | 121.30213 | 28.844274 | 0.8025479 | 0.10214708 | 22.508  |
| gi 113205565 ref NM_001044529.1 | magenta     | 121.27358 | 7.3966781 | 0.3825631 | 0.52506249 | 6.684   |
| gi 194043395 ref XM_001929562.1 | orange      | 121.18017 | 7.211339  | 0.6113446 | 0.27326356 | 7.254   |
| gi 194043630 ref XM_001926758.1 | violet      | 121.09958 | 10.778203 | -0.710241 | 0.17887428 | 5.93    |
| gnl UG Ssc#S39812694            | pink        | 120.84379 | 10.926738 | 0.1546422 | 0.80389099 | 10.656  |
| gi 148233297 ref NM_001097485.1 | paleturquoi | 120.43351 | 7.7125185 | 0.7726588 | 0.12559052 | 88.214  |
| gnl UG Ssc#S39982735            | violet      | 119.92415 | 12.297383 | -0.738269 | 0.15427153 | 4.372   |
| gnl UG Ssc#S34532625            | grey        | 119.47193 | 9.4129846 | 0.8259833 | 0.08482936 | 9.202   |
| gi 46095042 gb AY574215.1       | orange      | 119.27147 | 6.5178397 | 0.6440243 | 0.24087611 | 31.33   |
| gi 194042188 ref XM_001924178.1 | grey        | 119.14994 | 9.7665651 | 0.8479018 | 0.06955923 | 57.462  |

|                                 |            |           |           |           |            |         |
|---------------------------------|------------|-----------|-----------|-----------|------------|---------|
| gi 194040706 ref XM_001927201.1 | navy       | 119.11598 | 13.315901 | -0.168385 | 0.78662354 | 235.332 |
| gnl UG Ssc#S39943227            | red        | 119.10867 | 30.462587 | 0.8764513 | 0.05115337 | 11.646  |
| gi 194037879 ref XM_001925784.1 | royalblue  | 118.34151 | 18.650739 | 0.9709093 | 0.00593009 | 23.448  |
| gnl UG Ssc#S31131447            | violet     | 118.30624 | 14.784767 | -0.827549 | 0.08370798 | 32.956  |
| gi 47522679 ref NM_213904.1     | grey       | 118.00224 | 10.706543 | 0.6304284 | 0.25421689 | 81.344  |
| gnl UG Ssc#S18264158            | grey       | 117.9387  | 10.511845 | 0.6658808 | 0.21984818 | 11.356  |
| gnl UG Ssc#S34514406            | grey       | 117.7159  | 9.7260672 | 0.7499658 | 0.14432238 | 14.558  |
| gi 115552314 dbj AK230624.1     | darkmagent | 117.62412 | 4.8562493 | 0.7060462 | 0.18264566 | 59.42   |
| gnl UG Ssc#S19545503            | darkgrey   | 117.58372 | 12.195911 | 0.8937987 | 0.04087769 | 15.188  |
| gnl UG Ssc#S23699859            | violet     | 117.375   | 14.240994 | -0.802569 | 0.10213124 | 199.186 |
| gi 115552089 dbj AK239282.1     | red        | 117.36265 | 21.45317  | 0.5770097 | 0.30842209 | 76.214  |
| gnl UG Ssc#S22316206            | darkmagent | 117.3228  | 11.529461 | 0.9125057 | 0.03065631 | 41.008  |
| gnl UG Ssc#S18359803            | orange     | 117.15336 | 8.0623662 | 0.7798123 | 0.11984843 | 35.318  |
| gnl UG Ssc#S40571777            | red        | 116.85663 | 17.920345 | 0.4684881 | 0.42610398 | 7.832   |
| gi 115551105 dbj AK232538.1     | navy       | 116.7694  | 31.861339 | 0.925095  | 0.02433098 | 25.508  |
| gi 11555527 dbj AK234140.1      | violet     | 116.74737 | 12.438056 | -0.846759 | 0.07033167 | 5.09    |
| gnl UG Ssc#S40322346            | pink       | 116.4783  | 15.745913 | 0.9052412 | 0.03451371 | 35.662  |
| gi 115545853 dbj AK234286.1     | grey60     | 116.3044  | 13.447853 | 0.7131436 | 0.17627844 | 18.256  |
| gi 194044483 ref XM_001929150.1 | grey       | 116.01495 | 9.984927  | 0.6412282 | 0.24360376 | 105.112 |
| gi 115549571 dbj AK238379.1     | grey       | 116.01326 | 10.483229 | 0.7176604 | 0.17226016 | 22.488  |
| gnl UG Ssc#S18354391            | violet     | 115.8186  | 8.4024316 | 0.4419313 | 0.4562093  | 36.016  |
| gi 115546462 dbj AK230981.1     | yellow     | 115.69287 | 26.430101 | 0.7164164 | 0.17336414 | 10.66   |
| gi 115550900 dbj AK238761.1     | violet     | 115.54716 | 9.7424221 | -0.5748   | 0.31072213 | 61.948  |
| gi 115553196 dbj AK232994.1     | magenta    | 115.52087 | 10.330671 | 0.5375533 | 0.35012979 | 16.652  |
| gi 29373949 emb AJ539380.1      | grey       | 115.09092 | 10.113071 | 0.635521  | 0.24919706 | 54.628  |
| gnl UG Ssc#S40154789            | pink       | 115.00221 | 9.1759683 | 0.3211634 | 0.59822473 | 9.412   |
| gi 115546114 dbj AK240356.1     | pink       | 114.69327 | 10.569884 | 0.4477512 | 0.44957275 | 10.312  |
| gi 115555619 dbj AK237252.1     | grey       | 114.43237 | 8.7647584 | 0.6759082 | 0.21038069 | 122.902 |
| gnl UG Ssc#S39912933            | red        | 114.14775 | 31.488084 | 0.8305059 | 0.08160259 | 49.118  |
| gi 115553344 dbj AK233142.1     | red        | 113.84271 | 20.347156 | 0.5285412 | 0.35983816 | 18.898  |
| gnl UG Ssc#S18359692            | red        | 113.70335 | 21.078648 | 0.5412559 | 0.34616016 | 10.514  |
| gnl UG Ssc#S19542862            | orange     | 113.50241 | 4.6986728 | 0.6071564 | 0.27749218 | 47.97   |
| gi 194037617 ref XM_001927127.1 | magenta    | 113.28479 | 9.9854336 | 0.52242   | 0.36646913 | 79.634  |
| gnl UG Ssc#S18380710            | orange     | 112.70103 | 4.8985135 | 0.5910332 | 0.29392858 | 45.82   |
| gi 47523617 ref NM_214276.1     | red        | 112.48946 | 12.22289  | 0.3886429 | 0.51792014 | 59.31   |
| gnl UG Ssc#S26729898            | pink       | 111.80449 | 9.9914337 | -0.178671 | 0.77372491 | 22.646  |
| gnl UG Ssc#S18548374            | violet     | 111.76483 | 11.247886 | -0.638058 | 0.24670654 | 4.11    |
| gi 194035414 ref XM_001925502.1 | grey       | 110.7237  | 7.6027105 | 0.7585545 | 0.13714253 | 31.68   |
| gnl UG Ssc#S18552226            | navy       | 110.71807 | 16.270463 | -0.381865 | 0.52588326 | 15.088  |
| gi 115554371 dbj AK233381.1     | royalblue  | 110.55741 | 6.5486917 | 0.2037769 | 0.74235019 | 114.748 |
| gi 115549331 dbj AK232109.1     | navy       | 110.54718 | 16.524761 | -0.339006 | 0.57677992 | 105.248 |
| gnl UG Ssc#S18555329            | violet     | 109.91112 | 4.6410589 | 0.4649498 | 0.43008829 | 8.842   |
| gi 197251933 ref NM_001134354.1 | grey60     | 109.16731 | 12.379919 | 0.8828772 | 0.04726235 | 15.972  |
| gi 115550191 dbj AK235670.1     | navy       | 109.14793 | 14.407261 | -0.371306 | 0.53833772 | 31.712  |
| gi 194043858 ref XM_001928335.1 | red        | 109.07052 | 19.838075 | 0.5010677 | 0.38982532 | 25.46   |
| gnl UG Ssc#S26733049            | red        | 109.05642 | 29.109049 | 0.7749717 | 0.12372517 | 115.15  |
| gi 194042438 ref XM_001927977.1 | turquoise  | 108.97295 | 80.549427 | 0.449232  | 0.44788756 | 42.646  |
| gnl UG Ssc#S23764110            | red        | 108.90578 | 19.862654 | 0.845067  | 0.07148094 | 6.362   |

|                                 |              |           |           |           |            |         |
|---------------------------------|--------------|-----------|-----------|-----------|------------|---------|
| gi 194044061 ref XM_001927723.1 | navy         | 108.28883 | 14.960426 | -0.532335 | 0.35574287 | 8.106   |
| gi 47523187 ref NM_213830.1     | red          | 108.16378 | 28.170597 | 0.848529  | 0.0691363  | 11.342  |
| gi 194037661 ref XM_001928816.1 | royalblue    | 108.15996 | 0.8755376 | -0.352175 | 0.56104597 | 6.454   |
| gnl UG Ssc#S18550902            | pink         | 107.98454 | 6.6161693 | 0.0485938 | 0.93815286 | 90.926  |
| gi 115547606 dbj AK231264.1     | paleturquois | 107.75107 | 8.7729123 | 0.8281791 | 0.08325791 | 8.896   |
| gi 194039735 ref XM_001928389.1 | violet       | 107.32499 | 10.466662 | 0.6765019 | 0.20982382 | 341.496 |
| gnl UG Ssc#S31986337            | violet       | 107.30499 | 8.9944318 | 0.614432  | 0.27015741 | 8.4     |
| gnl UG Ssc#S23689853            | red          | 106.92117 | 25.439199 | 0.852701  | 0.06634335 | 6.396   |
| gnl UG Ssc#S20942207            | pink         | 106.81647 | 10.33722  | 0.2955744 | 0.62921689 | 18.718  |
| gi 190360630 ref NM_001128465.1 | pink         | 106.70986 | 13.436478 | 0.908955  | 0.03252344 | 76.1    |
| gnl UG Ssc#S22280355            | orange       | 106.61465 | 6.6658957 | 0.5183051 | 0.37094318 | 24.592  |
| gi 194033590 ref XM_001929195.1 | magenta      | 106.51462 | 16.305653 | 0.7755014 | 0.12329918 | 157.532 |
| gnl UG Ssc#S18549403            | pink         | 106.48705 | 12.496971 | 0.3314944 | 0.58579109 | 30.124  |
| gi 194043329 ref XM_001929273.1 | red          | 106.04574 | 24.620461 | 0.8909986 | 0.04248647 | 68.258  |
| gi 115549792 dbj AK232072.1     | darkgrey     | 105.68928 | 10.051244 | 0.8606424 | 0.06112748 | 4.812   |
| gnl UG Ssc#S40416576            | yellow       | 105.55157 | 17.000587 | 0.4048804 | 0.49894312 | 4.256   |
| gnl UG Ssc#S40070781            | orange       | 105.54167 | 5.3755279 | 0.4767619 | 0.41682033 | 14.246  |
| gi 115549976 dbj AK232211.1     | paleturquois | 105.32083 | 13.033888 | 0.9420989 | 0.01657892 | 17.84   |
| gnl UG Ssc#S18268289            | royalblue    | 105.12107 | 6.4016213 | 0.5347948 | 0.35309446 | 2.802   |
| gi 194036374 ref XM_001929178.1 | grey         | 104.75579 | 9.2757314 | 0.4611418 | 0.43438574 | 33.7    |
| gnl UG Ssc#S26400566            | orange       | 104.66219 | 7.9128564 | 0.53125   | 0.35691321 | 5.75    |
| gi 115553496 dbj AK236699.1     | violet       | 104.18946 | 12.28232  | -0.666252 | 0.21949586 | 59.24   |
| gnl UG Ssc#S18260863            | midnightblu  | 104.02044 | 9.4648312 | 0.6678358 | 0.21799331 | 11.05   |
| gnl UG Ssc#S29989999            | navy         | 103.95318 | 15.465922 | -0.2623   | 0.66989891 | 30.478  |
| gnl UG Ssc#S23755686            | violet       | 103.21289 | 14.327057 | -0.78568  | 0.1151988  | 8.012   |
| gi 115550629 dbj AK232459.1     | red          | 103.15283 | 11.461802 | 0.3557653 | 0.55677113 | 33.212  |
| gi 194039625 ref XM_001925622.1 | pink         | 101.8036  | 10.177356 | -0.188413 | 0.76153164 | 21.546  |
| gnl UG Ssc#S19546116            | red          | 101.65826 | 23.957393 | 0.6914313 | 0.19595716 | 11.206  |
| gnl UG Ssc#S17515091            | pink         | 101.4859  | 11.67355  | 0.2599647 | 0.6727696  | 2.442   |
| gnl UG Ssc#S23696561            | red          | 101.46108 | 17.149993 | 0.424263  | 0.47648558 | 11.94   |
| gnl UG Ssc#S26735228            | red          | 101.12542 | 29.096034 | 0.917767  | 0.02795582 | 29.14   |
| gnl UG Ssc#S23760026            | red          | 100.91786 | 26.685617 | 0.9121807 | 0.03082573 | 7.278   |
| gnl UG Ssc#S26725357            | red          | 100.83628 | 25.003277 | 0.7217347 | 0.16865845 | 6.542   |
| gi 115547167 dbj AK231222.1     | yellow       | 100.78719 | 29.236746 | 0.7214831 | 0.16888025 | 5.64    |
| gnl UG Ssc#S31124721            | magenta      | 100.42397 | 13.500656 | 0.5807873 | 0.30450022 | 6.18    |
| gnl UG Ssc#S23690339            | grey60       | 99.646263 | 11.577285 | 0.8734704 | 0.05299107 | 25.292  |
| gi 115552800 dbj AK239394.1     | grey60       | 98.813633 | 12.997608 | 0.8192393 | 0.08971173 | 21.764  |
| gi 52351306 gb AY609738.1       | violet       | 98.366504 | 10.698827 | -0.764263 | 0.13243049 | 62.42   |
| gi 194036851 ref XM_001928643.1 | magenta      | 98.270088 | 16.666194 | 0.7641365 | 0.13253465 | 59.576  |
| gi 115554982 dbj AK240181.1     | turquoise    | 98.246405 | 60.105082 | 0.367073  | 0.543347   | 68.348  |
| gi 52351346 gb AY609778.1       | pink         | 98.041486 | 9.6707165 | 0.2868436 | 0.63985145 | 29.344  |
| gnl UG Ssc#S39841622            | pink         | 98.030425 | 11.097493 | 0.8711946 | 0.05440775 | 8.192   |
| gnl UG Ssc#S23689827            | darkgreen    | 98.008485 | 10.358365 | 0.7430997 | 0.15013894 | 4.87    |
| gnl UG Ssc#S40334339            | pink         | 97.815333 | 10.327179 | -0.137532 | 0.82544184 | 37.374  |
| gnl UG Ssc#S17513547            | grey         | 97.788416 | 9.0691969 | 0.5983786 | 0.28640978 | 5.88    |
| gi 47522617 ref NM_213934.1     | darkgrey     | 97.740905 | 3.6566471 | 0.114311  | 0.85477234 | 56.36   |
| gnl UG Ssc#S39989284            | navy         | 97.714322 | 12.748612 | -0.406044 | 0.4975884  | 4.676   |
| gi 115553398 dbj AK236601.1     | orange       | 97.606937 | 7.6433543 | 0.4951095 | 0.3964035  | 22.688  |



|                                   |            |           |           |           |            |         |
|-----------------------------------|------------|-----------|-----------|-----------|------------|---------|
| gi 115545749 dbj AK234182.1       | pink       | 97.51669  | 12.135112 | 0.9023477 | 0.03609039 | 14.22   |
| gnl UG Ssc#S40238117              | pink       | 97.506771 | 12.35134  | 0.4218765 | 0.4792388  | 73.132  |
| gi 47523461 ref NM_214192.1       | orange     | 97.381847 | 7.0971903 | 0.4813825 | 0.41165626 | 457.41  |
| gnl UG Ssc#S29971491              | violet     | 97.173426 | 10.423643 | -0.629573 | 0.25506281 | 18.72   |
| gi 47523537 ref NM_214231.1       | grey       | 97.067523 | 6.7016722 | 0.7961276 | 0.10705898 | 2.962   |
| gnl UG Ssc#S29984324              | darkgrey   | 96.395424 | 1.3535761 | 0.3136744 | 0.60726687 | 239.02  |
| gi 115546413 dbj AK230932.1       | red        | 94.611961 | 14.583933 | 0.3482028 | 0.56578378 | 10.476  |
| gnl UG Ssc#S19541103              | grey       | 94.528128 | 7.1281806 | 0.3545932 | 0.55816618 | 49.9    |
| gnl UG Ssc#S23695399              | red        | 94.366192 | 29.212216 | 0.8862727 | 0.04524601 | 24.224  |
| gi 115548000 dbj AK237984.1       | navy       | 94.273914 | 12.380101 | -0.213275 | 0.73052214 | 14.764  |
| gi 115554299 dbj AK240094.1       | violet     | 94.075362 | 10.212084 | 0.7509986 | 0.14345332 | 114.108 |
| gnl UG Ssc#S18551614              | red        | 93.977683 | 19.475822 | 0.8321733 | 0.08042268 | 5.472   |
| gnl UG Ssc#S19537170              | yellow     | 93.587612 | 25.195941 | 0.6230357 | 0.26155156 | 28.962  |
| gi 115547950 dbj AK234927.1       | pink       | 93.375979 | 10.419943 | 0.5013471 | 0.38951754 | 81.274  |
| gnl UG Ssc#S18554486              | royalblue  | 93.332665 | 6.9219296 | 0.2414619 | 0.69557534 | 19.714  |
| gnl UG Ssc#S26721534              | red        | 93.094317 | 26.672651 | 0.7188232 | 0.17123002 | 46.772  |
| gnl UG Ssc#S23769437              | turquoise  | 93.061732 | 61.509379 | 0.3827956 | 0.52478896 | 22.63   |
| gnl UG Ssc#S38483118              | magenta    | 92.263068 | 7.7491876 | 0.3713247 | 0.53831603 | 17.042  |
| gi 47522799 ref NM_213987.1       | violet     | 91.290077 | 9.6886699 | 0.5810967 | 0.30417957 | 5.712   |
| gi 115554130 dbj AK233340.1       | turquoise  | 90.213106 | 57.376349 | 0.3638282 | 0.54719271 | 33.99   |
| gnl UG Ssc#S23698110              | royalblue  | 89.998554 | 7.2395111 | 0.2879789 | 0.63846697 | 45.434  |
| gi 115549562 dbj AK238370.1       | red        | 89.678015 | 19.462053 | 0.6040632 | 0.28062613 | 10.27   |
| gnl UG Ssc#S23700414              | pink       | 89.345414 | 8.7289765 | 0.3572189 | 0.55504198 | 12.53   |
| gi 194036038 ref XM_001928648.1   | pink       | 89.121566 | 9.5184211 | 0.2203448 | 0.72173533 | 19.34   |
| gnl UG Ssc#S40144447              | magenta    | 89.066828 | 6.5650659 | 0.3371812 | 0.57896712 | 61.374  |
| gi 194040755 ref XM_001927097.1   | orange     | 89.056153 | 6.8038187 | 0.405989  | 0.49765277 | 144.69  |
| gi 115547122 dbj AK231177.1       | turquoise  | 88.691625 | 62.786501 | 0.3960835 | 0.50920611 | 20.248  |
| gnl UG Ssc#S23775545              | royalblue  | 88.579906 | 10.915622 | 0.8580391 | 0.06282258 | 2.442   |
| gnl UG Ssc#S23776646              | pink       | 88.366285 | 7.9072606 | 0.3405323 | 0.57495281 | 26.086  |
| gi 194037553 ref XM_001929410.1   | navy       | 87.853387 | 18.456389 | 0.7359487 | 0.15626773 | 382.886 |
| gi 115553209 dbj AK233007.1       | pink       | 87.680174 | 9.9555708 | -0.144039 | 0.81723968 | 107.014 |
| gnl UG Ssc#S39803256              | orange     | 87.61531  | 4.6743488 | 0.3488577 | 0.56500219 | 3.516   |
| gnl UG Ssc#S31111456              | pink       | 87.518871 | 12.349539 | 0.4061707 | 0.49744131 | 17.978  |
| gnl UG Ssc#S40239854              | royalblue  | 87.457952 | 7.1687308 | 0.403219  | 0.50087804 | 3.568   |
| gnl UG Ssc#S39861498              | red        | 87.256429 | 9.1621267 | 0.2590434 | 0.67390245 | 87.258  |
| gnl UG Ssc#S39776069              | grey60     | 86.018948 | 0.9704145 | -0.420405 | 0.48093771 | 39.532  |
| gnl UG Ssc#S19550176              | yellow     | 85.599073 | 14.603628 | 0.3215127 | 0.59780362 | 2.162   |
| gi 48374070 ref NM_001001539.1    | yellow     | 85.426456 | 20.533738 | 0.5189764 | 0.37021236 | 34.254  |
| gnl UG Ssc#S40152348              | pink       | 85.423033 | 8.134854  | 0.2346228 | 0.70403285 | 12.992  |
| gnl UG Ssc#S18558154              | grey       | 84.803865 | 7.3487135 | 0.4894892 | 0.40263223 | 5.336   |
| gi 9802381 gb AF281156.1 AF281156 | red        | 84.546083 | 25.634047 | 0.7230731 | 0.16748016 | 4.244   |
| gi 56199611 gb AY705447.1         | pink       | 83.827084 | 10.255233 | 0.2690681 | 0.66159171 | 6.032   |
| gi 217416473 ref NM_001142668.1   | grey       | 83.750958 | 6.0246088 | 0.3256086 | 0.59286906 | 25.094  |
| gi 57528019 ref NM_001009581.1    | darkmagent | 82.875335 | 6.4420021 | 0.7747707 | 0.12388694 | 20.534  |
| gnl UG Ssc#S6063458               | violet     | 82.820762 | 8.6280867 | 0.5243076 | 0.36442122 | 28.864  |
| gi 194033718 ref XM_001926719.1   | darkgrey   | 82.730813 | 2.9699777 | -0.108134 | 0.8625884  | 18.746  |
| gnl UG Ssc#S23772152              | pink       | 82.465172 | 11.155767 | 0.4950474 | 0.39647225 | 29.474  |
| gnl UG Ssc#S19541579              | pink       | 82.219453 | 10.229805 | 0.1309321 | 0.83376967 | 24.712  |

|                                 |           |           |           |           |            |         |
|---------------------------------|-----------|-----------|-----------|-----------|------------|---------|
| gnl UG Ssc#S23759640            | pink      | 81.787564 | 9.8164569 | 0.2506876 | 0.68419    | 137.088 |
| gnl UG Ssc#S35325128            | darkgrey  | 81.629567 | 2.3821064 | 0.4409805 | 0.45729554 | 3.274   |
| gnl UG Ssc#S17526422            | darkgrey  | 81.132766 | 6.2411006 | 0.7031261 | 0.18528406 | 11.742  |
| gnl UG Ssc#S34524449            | pink      | 80.783227 | 10.666473 | 0.0157182 | 0.97998777 | 6.002   |
| gnl UG Ssc#S18386573            | orange    | 80.604022 | 4.0755121 | 0.1956622 | 0.752474   | 11.59   |
| gnl UG Ssc#S19546988            | turquoise | 79.753378 | 49.862901 | 0.3662908 | 0.54427362 | 41.832  |
| gnl UG Ssc#S26727063            | violet    | 79.698039 | 7.3082235 | 0.4576109 | 0.43837899 | 8.094   |
| gnl UG Ssc#S26714791            | magenta   | 79.557859 | 12.558132 | 0.6045456 | 0.28013681 | 69.504  |
| gnl UG Ssc#S34500484            | royalblue | 79.282236 | 7.1254927 | 0.212394  | 0.73161873 | 11.31   |
| gi 115547397 dbj AK237778.1     | red       | 79.190422 | 26.663199 | 0.8101462 | 0.09642534 | 7.934   |
| gnl UG Ssc#S16761675            | orange    | 78.815087 | 5.1990797 | 0.3426699 | 0.5723948  | 9.874   |
| gi 194045111 ref XM_001927898.1 | darkgrey  | 78.184197 | 3.9914617 | 0.2498192 | 0.68526056 | 41.854  |
| gi 197717772 gb EF113595.2      | violet    | 77.747873 | 5.9607208 | 0.2954235 | 0.62940045 | 214.092 |
| gi 47523559 ref NM_214239.1     | royalblue | 76.024873 | 6.5245673 | 0.2624808 | 0.66967728 | 38.972  |
| gi 115551480 dbj AK236158.1     | grey      | 75.894558 | 5.914674  | 0.3156142 | 0.60492252 | 13.6    |
| gnl UG Ssc#S17511731            | magenta   | 75.867032 | 9.4822787 | 0.3633976 | 0.54770345 | 7.086   |
| gnl UG Ssc#S16512910            | pink      | 75.644033 | 9.366807  | 0.1189463 | 0.84891077 | 2.898   |
| gi 115546179 dbj AK240417.1     | pink      | 74.601181 | 7.7288409 | 0.1021572 | 0.87015594 | 9.336   |
| gnl UG Ssc#S40491599            | grey60    | 74.543503 | 1.9102551 | -0.112987 | 0.85644759 | 5.814   |
| gnl UG Ssc#S26719135            | yellow    | 73.435157 | 16.511278 | 0.3954972 | 0.50989174 | 19.546  |
| gi 115552956 dbj AK239550.1     | darkgrey  | 72.862434 | 3.355201  | -0.031279 | 0.96018066 | 4.798   |
| gi 47522845 ref NM_214010.1     | darkgrey  | 72.092266 | 3.7931817 | 0.1087504 | 0.86180815 | 55.652  |
| gnl UG Ssc#S23765368            | turquoise | 71.245058 | 48.723916 | 0.3714506 | 0.53816727 | 2.366   |
| gnl UG Ssc#S23691069            | orange    | 70.610501 | 6.4071597 | 0.5646007 | 0.32139477 | 18.452  |
| gnl UG Ssc#S31113853            | darkgrey  | 69.514044 | 4.2739433 | 0.5158779 | 0.37358826 | 15.766  |
| gnl UG Ssc#S23698294            | red       | 67.787834 | 22.178342 | 0.6492326 | 0.23581769 | 11.946  |
| gnl UG Ssc#S18549761            | pink      | 66.676067 | 3.1494361 | 0.0871221 | 0.88921317 | 31.408  |
| gnl UG Ssc#S23695397            | pink      | 66.448307 | 10.035936 | 0.3524948 | 0.56066543 | 27.182  |
| gi 194034729 ref XM_001924943.1 | orange    | 66.43938  | 4.5440012 | 0.3948138 | 0.51069099 | 61.65   |
| gnl UG Ssc#S23691372            | pink      | 66.203477 | 7.2049603 | -0.381882 | 0.52586395 | 19.412  |
| gnl UG Ssc#S18549494            | red       | 63.498291 | 18.822105 | 0.6380639 | 0.24670067 | 3.71    |
| gnl UG Ssc#S18553581            | darkgrey  | 62.588104 | 0.8247482 | -0.07855  | 0.90008997 | 111.57  |
| gnl UG Ssc#S26712602            | orange    | 61.525405 | 5.0738592 | 0.2402667 | 0.69705225 | 12.89   |
| gi 51592101 ref NM_001004028.1  | navy      | 61.246305 | 6.1871724 | -0.313774 | 0.60714603 | 11.71   |
| gnl UG Ssc#S22287254            | red       | 61.063532 | 18.720247 | 0.5551713 | 0.3313424  | 35.606  |
| gi 115552537 dbj AK236542.1     | red       | 59.132082 | 18.491569 | 0.6551695 | 0.2300875  | 10.148  |
| gi 115551521 dbj AK238985.1     | royalblue | 58.166931 | 6.5916897 | 0.1561563 | 0.80198661 | 67.36   |
| gnl UG Ssc#S35173188            | red       | 57.633664 | 13.254297 | 0.4132659 | 0.48920061 | 8.596   |
| gnl UG Ssc#S17526927            | royalblue | 52.965438 | 5.8856474 | 0.638346  | 0.24642412 | 3.408   |
| gnl UG Ssc#S26726211            | pink      | 50.11439  | 6.3569312 | -0.03596  | 0.9542245  | 3.29    |
| gnl UG Ssc#S16764287            | yellow    | 49.874269 | 9.1898915 | 0.3252977 | 0.59324335 | 7.518   |
| gi 194036795 ref XM_001926863.1 | yellow    | 49.24125  | 8.9444093 | 0.1997142 | 0.74741665 | 10.528  |
| gi 115553497 dbj AK236700.1     | darkgrey  | 47.490745 | 2.2177019 | 0.1528746 | 0.80611486 | 314.974 |
| gnl UG Ssc#S34511356            | red       | 47.250071 | 11.394138 | 0.3657097 | 0.54496213 | 7.672   |
| gi 113205651 ref NM_001044553.1 | royalblue | 47.091514 | 4.8134119 | 0.5311257 | 0.35704734 | 45.238  |
| gnl UG Ssc#S23762936            | royalblue | 45.120711 | 5.7103483 | 0.2861237 | 0.64072966 | 23.108  |
| gnl UG Ssc#S26723792            | grey      | 43.027301 | 0.3756514 | 0.1690408 | 0.78580006 | 0.942   |
| gnl UG Ssc#S18289737            | turquoise | 41.917366 | 12.586387 | 0.126011  | 0.8399834  | 17.876  |

Table S2-4 Attributes of genes in all modules of LT postnatal.

| GeneSymbol                         | Module       | kTotal   | kWithin | eigencorr | eigenpval | meanExpr |
|------------------------------------|--------------|----------|---------|-----------|-----------|----------|
| gi 10304379 gb AF288822.1 AF288822 | darkgreen    | 227.9604 | 19.785  | 0.814487  | 0.093202  | 40.564   |
| gi 106073315 gb DQ508264.1         | midnightblue | 115.1175 | 31.2781 | 0.918765  | 0.027453  | 94.888   |
| gi 108796051 ref NM_213912.2       | brown        | 114.2136 | 36.2588 | 0.713788  | 0.175704  | 390.69   |
| gi 108796069 ref NM_001042375.1    | turquoise    | 767.4647 | 238.488 | 0.937962  | 0.018375  | 307.39   |
| gi 109639160 ref NM_001025222.2    | green        | 142.9373 | 47.2479 | 0.923689  | 0.025014  | 1645.34  |
| gi 109639161 ref NM_001006593.2    | darkgrey     | 168.7855 | 28.3404 | 0.94345   | 0.016006  | 9.976    |
| gi 112181313 ref NM_214438.2       | white        | 192.6601 | 7.84721 | 0.161158  | 0.795699  | 486.494  |
| gi 11276047 gb AF319661.1          | yellow       | 227.7817 | 78.7817 | 0.897465  | 0.038802  | 2.074    |
| gi 113205497 ref NM_001044527.1    | green        | 75.26229 | 36.7015 | 0.793125  | 0.10938   | 6225.968 |
| gi 113205581 ref NM_001044532.1    | pink         | 196.4695 | 59.9456 | 0.953881  | 0.011807  | 23.858   |
| gi 113205585 ref NM_001044535.1    | turquoise    | 530.5862 | 165.242 | 0.829869  | 0.082055  | 36.464   |
| gi 113205611 ref NM_001044541.1    | darkmagenta  | 989.5859 | 26.5177 | 0.990016  | 0.001196  | 27.728   |
| gi 113205623 ref NM_001044545.1    | darkmagenta  | 973.8972 | 26.857  | 0.99297   | 0.000707  | 21.52    |
| gi 113205635 ref NM_001044548.1    | pink         | 270.3017 | 75.3635 | 0.997006  | 0.000197  | 7.026    |
| gi 113205649 ref NM_001044550.1    | green        | 91.251   | 40.3223 | 0.833347  | 0.079596  | 703.308  |
| gi 113205651 ref NM_001044553.1    | purple       | 68.54283 | 12.9862 | 0.636384  | 0.248349  | 44.358   |
| gi 113205653 ref NM_001044551.1    | turquoise    | 617.8179 | 203.639 | 0.905952  | 0.03413   | 627.042  |
| gi 113205665 ref NM_001044554.1    | lightcyan    | 275.9698 | 40.8369 | 0.971355  | 0.005795  | 91.424   |
| gi 113205675 ref NM_001044558.1    | white        | 163.2146 | 18.3262 | 0.731986  | 0.159694  | 17.26    |
| gi 113205689 ref NM_001044559.1    | blue         | 860.6251 | 233.497 | 0.969252  | 0.006442  | 17.694   |
| gi 113205765 ref NM_001044576.1    | lightyellow  | 852.4371 | 59.9727 | 0.988309  | 0.001515  | 15.828   |
| gi 113205779 ref NM_001044584.1    | green        | 136.3366 | 39.8727 | 0.851089  | 0.067418  | 50.568   |
| gi 113205811 ref NM_001044593.1    | black        | 980.7541 | 96.8313 | 0.993834  | 0.000581  | 518.232  |
| gi 113205825 ref NM_001044594.1    | darkorange   | 135.8717 | 18.2274 | 0.899606  | 0.037605  | 263.652  |
| gi 113205835 ref NM_001044599.1    | violet       | 986.2911 | 74.5655 | 0.997437  | 0.000156  | 101.432  |
| gi 113205859 ref NM_001044605.1    | blue         | 390.28   | 77.4084 | 0.729755  | 0.161633  | 96.68    |
| gi 113205873 ref NM_001044606.1    | magenta      | 258.9874 | 71.0626 | 0.966955  | 0.007175  | 315.914  |
| gi 113205877 ref NM_001044607.1    | royalblue    | 336.9907 | 32.7652 | 0.992102  | 0.000842  | 42.512   |
| gi 113205897 ref NM_001044613.1    | blue         | 769.0289 | 187.803 | 0.918958  | 0.027356  | 13.04    |
| gi 113205905 ref NM_001044614.1    | black        | 956.9403 | 96.1754 | 0.992875  | 0.000721  | 144.45   |
| gi 113205907 ref NM_001044616.1    | blue         | 700.7005 | 197.234 | 0.934613  | 0.019873  | 95.69    |
| gi 113205909 ref NM_001044615.1    | blue         | 776.2276 | 232.166 | 0.967627  | 0.006958  | 7.73     |
| gi 113205921 ref NM_001044618.1    | lightcyan    | 199.3814 | 28.1033 | 0.895502  | 0.039909  | 15.548   |
| gi 113205929 ref NM_001044620.1    | darkorange   | 159.7073 | 9.13064 | 0.579872  | 0.305449  | 206.106  |
| gi 114326182 ref NM_001048072.1    | navy         | 153.5    | 38.66   | 0.952197  | 0.012456  | 88.23    |
| gi 114326213 ref NM_001048069.1    | turquoise    | 640.3681 | 163.781 | 0.847542  | 0.069802  | 14.414   |
| gi 115545542 dbj AK230657.1        | blue         | 755.464  | 212.487 | 0.945365  | 0.015204  | 80.202   |
| gi 115545552 dbj AK230667.1        | turquoise    | 444.1552 | 116.277 | 0.739201  | 0.153472  | 22.25    |
| gi 115545568 dbj AK230683.1        | brown        | 131.6826 | 42.8046 | 0.819489  | 0.08953   | 21.626   |
| gi 115545600 dbj AK230715.1        | lightcyan    | 231.703  | 35.4866 | 0.92468   | 0.024532  | 58.736   |
| gi 115545603 dbj AK230718.1        | turquoise    | 363.7236 | 114.872 | 0.721685  | 0.168702  | 0.622    |
| gi 115545609 dbj AK230724.1        | sienna3      | 885.0631 | 25.0755 | 0.99184   | 0.000884  | 23.766   |
| gi 115545622 dbj AK230737.1        | turquoise    | 360.7645 | 109.21  | 0.710276  | 0.178843  | 13.412   |
| gi 115545632 dbj AK230747.1        | turquoise    | 656.52   | 206.513 | 0.922039  | 0.025823  | 15.87    |
| gi 115545643 dbj AK230758.1        | white        | 923.0399 | 29.5982 | 0.823772  | 0.086421  | 29.456   |
| gi 115545669 dbj AK230784.1        | lightcyan    | 313.9209 | 39.4494 | 0.95519   | 0.01131   | 143.292  |

|                             |             |          |         |          |          |         |
|-----------------------------|-------------|----------|---------|----------|----------|---------|
| gi 115545681 dbj AK230796.1 | magenta     | 205.0892 | 64.9814 | 0.948723 | 0.013831 | 20.168  |
| gi 115545725 dbj AK234158.1 | turquoise   | 426.7444 | 124.092 | 0.739937 | 0.152841 | 1.962   |
| gi 115545741 dbj AK234174.1 | violet      | 906.6453 | 73.3303 | 0.994055 | 0.00055  | 18.3    |
| gi 115545742 dbj AK234175.1 | lightcyan   | 180.5357 | 11.8501 | 0.46254  | 0.432807 | 11.834  |
| gi 115545749 dbj AK234182.1 | red         | 563.7784 | 98.8987 | 0.975267 | 0.004652 | 7.304   |
| gi 115545756 dbj AK234189.1 | greenyellow | 168.4556 | 51.0685 | 0.979375 | 0.003545 | 5.542   |
| gi 115545757 dbj AK234190.1 | tan         | 859.7974 | 66.2259 | 0.99055  | 0.001101 | 13.238  |
| gi 115545762 dbj AK234195.1 | darkred     | 242.5098 | 44.7733 | 0.991452 | 0.000947 | 5.842   |
| gi 115545765 dbj AK234198.1 | turquoise   | 574.9854 | 190.104 | 0.870568 | 0.0548   | 28.588  |
| gi 115545770 dbj AK234203.1 | turquoise   | 687.4944 | 176.234 | 0.874767 | 0.052189 | 8.85    |
| gi 115545783 dbj AK234216.1 | yellow      | 301.7624 | 110.602 | 0.978133 | 0.003869 | 2.53    |
| gi 115545816 dbj AK234249.1 | turquoise   | 200.7615 | 43.4901 | 0.437637 | 0.46112  | 27.126  |
| gi 115545827 dbj AK234260.1 | blue        | 751.4005 | 223.612 | 0.961985 | 0.008847 | 9.862   |
| gi 115545844 dbj AK234277.1 | brown       | 118.3431 | 42.3551 | 0.877719 | 0.050378 | 555.19  |
| gi 115545853 dbj AK234286.1 | black       | 958.4034 | 98.8656 | 0.99868  | 5.76E-05 | 30.558  |
| gi 115545868 dbj AK234301.1 | tan         | 948.2139 | 59.4798 | 0.966342 | 0.007375 | 8.424   |
| gi 115545894 dbj AK234327.1 | magenta     | 265.1835 | 81.917  | 0.998545 | 6.66E-05 | 26.018  |
| gi 115545904 dbj AK234337.1 | darkmagenta | 794.3376 | 23.2632 | 0.964217 | 0.008082 | 18.468  |
| gi 115545921 dbj AK237362.1 | turquoise   | 843.2997 | 261.818 | 0.967687 | 0.006939 | 13.204  |
| gi 115545926 dbj AK237367.1 | green       | 102.2979 | 45.8212 | 0.907385 | 0.03336  | 15.292  |
| gi 115545943 dbj AK237384.1 | pink        | 119.5624 | 12.5781 | 0.088841 | 0.887033 | 1.898   |
| gi 115545949 dbj AK237390.1 | green       | 119.4141 | 58.5855 | 0.980488 | 0.003262 | 43.65   |
| gi 115545955 dbj AK237396.1 | turquoise   | 697.2448 | 210.728 | 0.927373 | 0.023238 | 4.996   |
| gi 115545973 dbj AK237414.1 | purple      | 113.1843 | 14.3897 | 0.757091 | 0.138358 | 160.61  |
| gi 115545984 dbj AK237425.1 | red         | 329.5938 | 73.6241 | 0.91096  | 0.031465 | 22.494  |
| gi 115545987 dbj AK237428.1 | greenyellow | 115.3271 | 31.2738 | 0.861699 | 0.060444 | 18.036  |
| gi 115545992 dbj AK237433.1 | turquoise   | 708.9512 | 207.562 | 0.908835 | 0.032587 | 14.12   |
| gi 115546038 dbj AK237480.1 | navy        | 164.8134 | 43.3976 | 0.98777  | 0.001621 | 16.524  |
| gi 115546047 dbj AK237489.1 | turquoise   | 450.8548 | 138.552 | 0.787603 | 0.113687 | 29.384  |
| gi 115546075 dbj AK237517.1 | lightcyan   | 297.3675 | 43.5788 | 0.990237 | 0.001156 | 16.596  |
| gi 115546087 dbj AK237529.1 | salmon      | 165.6599 | 43.7241 | 0.955186 | 0.011311 | 48.612  |
| gi 115546117 dbj AK240359.1 | navy        | 156.8371 | 42.6814 | 0.981899 | 0.002915 | 27.052  |
| gi 115546125 dbj AK230834.1 | black       | 836.9002 | 90.3762 | 0.980232 | 0.003327 | 27.676  |
| gi 115546138 dbj AK240376.1 | black       | 937.6764 | 97.1449 | 0.994768 | 0.000454 | 92.706  |
| gi 115546160 dbj AK240398.1 | blue        | 745.7006 | 214.816 | 0.948799 | 0.0138   | 8.536   |
| gi 115546163 dbj AK240401.1 | lightcyan   | 169.1851 | 12.9137 | 0.522691 | 0.366175 | 4.77    |
| gi 115546179 dbj AK240417.1 | pink        | 272.0237 | 70.2201 | 0.965145 | 0.007771 | 10.546  |
| gi 115546190 dbj AK240428.1 | yellow      | 270.332  | 102.878 | 0.963222 | 0.00842  | 3.876   |
| gi 115546193 dbj AK240431.1 | lightcyan   | 204.428  | 30.631  | 0.895909 | 0.039679 | 52.396  |
| gi 115546201 dbj AK240439.1 | salmon      | 170.8633 | 45.4914 | 0.962997 | 0.008497 | 28.244  |
| gi 115546215 dbj AK240453.1 | green       | 93.31074 | 40.2935 | 0.850249 | 0.067981 | 30.938  |
| gi 115546231 dbj AK240469.1 | white       | 193.1636 | 24.6828 | 0.879959 | 0.049017 | 7.384   |
| gi 115546234 dbj AK240472.1 | turquoise   | 903.1725 | 267.944 | 0.978633 | 0.003737 | 13.624  |
| gi 115546241 dbj AK240479.1 | orange      | 286.3087 | 30.853  | 0.968767 | 0.006595 | 213.696 |
| gi 115546292 dbj AK240530.1 | darkorange  | 176.4019 | 21.9788 | 0.985945 | 0.001996 | 10.656  |
| gi 115546304 dbj AK240542.1 | blue        | 880.2415 | 248.676 | 0.985244 | 0.002147 | 26.04   |
| gi 115546313 dbj AK240551.1 | magenta     | 267.8723 | 75.4288 | 0.979804 | 0.003435 | 6.328   |
| gi 115546324 dbj AK230843.1 | darkgrey    | 154.8386 | 23.5217 | 0.913564 | 0.030107 | 87.472  |

|                             |               |          |         |          |          |         |
|-----------------------------|---------------|----------|---------|----------|----------|---------|
| gi 115546331 dbj AK230850.1 | darkturquoise | 211.3913 | 32.4981 | 0.978103 | 0.003877 | 67.248  |
| gi 115546334 dbj AK230853.1 | violet        | 937.0112 | 73.5181 | 0.994666 | 0.000467 | 54.728  |
| gi 115546337 dbj AK230856.1 | turquoise     | 401.1657 | 117.908 | 0.725006 | 0.165782 | 24.774  |
| gi 115546371 dbj AK230890.1 | red           | 616.9937 | 93.5819 | 0.963067 | 0.008473 | 43.102  |
| gi 115546374 dbj AK230893.1 | darkmagenta   | 972.5468 | 26.1962 | 0.987383 | 0.001698 | 14.17   |
| gi 115546403 dbj AK230922.1 | blue          | 818.7351 | 233.796 | 0.971603 | 0.00572  | 6.674   |
| gi 115546406 dbj AK230925.1 | blue          | 936.8187 | 211.632 | 0.949464 | 0.013534 | 14.562  |
| gi 115546428 dbj AK230947.1 | pink          | 260.2889 | 71.0475 | 0.982947 | 0.002666 | 7.94    |
| gi 115546438 dbj AK230957.1 | royalblue     | 195.0516 | 0.90031 | -0.48291 | 0.409951 | 76.236  |
| gi 115546446 dbj AK230965.1 | turquoise     | 836.3576 | 245.863 | 0.94829  | 0.014005 | 63.508  |
| gi 115546452 dbj AK230971.1 | darkred       | 252.568  | 37.214  | 0.951419 | 0.01276  | 18.836  |
| gi 115546465 dbj AK230984.1 | skyblue       | 158.1999 | 21.4161 | 0.908692 | 0.032663 | 122.188 |
| gi 115546477 dbj AK230996.1 | skyblue       | 200.6065 | 29.772  | 0.977567 | 0.00402  | 33.306  |
| gi 115546487 dbj AK231006.1 | brown         | 213.6194 | 62.5746 | 0.933032 | 0.020593 | 4.462   |
| gi 115546495 dbj AK231014.1 | blue          | 868.779  | 238.632 | 0.976526 | 0.004302 | 7.13    |
| gi 115546548 dbj AK234386.1 | grey          | 159.5457 | 8.1857  | 0.871466 | 0.054238 | 8.404   |
| gi 115546569 dbj AK234407.1 | turquoise     | 826.8496 | 255.42  | 0.972686 | 0.005397 | 4.046   |
| gi 115546576 dbj AK234414.1 | green         | 166.0341 | 18.3423 | 0.030734 | 0.960874 | 85.82   |
| gi 115546586 dbj AK234424.1 | turquoise     | 320.7377 | 86.1084 | 0.653107 | 0.232073 | 209.138 |
| gi 115546610 dbj AK234448.1 | tan           | 956.613  | 63.5046 | 0.979963 | 0.003394 | 17.49   |
| gi 115546623 dbj AK234461.1 | red           | 465.5263 | 82.7269 | 0.935321 | 0.019553 | 133.084 |
| gi 115546625 dbj AK234463.1 | yellow        | 230.7213 | 76.4264 | 0.895147 | 0.04011  | 1.34    |
| gi 115546628 dbj AK234466.1 | violet        | 960.0195 | 73.621  | 0.994903 | 0.000436 | 9.502   |
| gi 115546638 dbj AK234476.1 | blue          | 880.9878 | 197.494 | 0.935032 | 0.019684 | 12.038  |
| gi 115546656 dbj AK234494.1 | yellow        | 144.9791 | 38.5926 | 0.720575 | 0.169682 | 22.612  |
| gi 115546680 dbj AK234518.1 | grey          | 196.9277 | 11.8213 | 0.169489 | 0.785238 | 104.382 |
| gi 115546695 dbj AK234533.1 | skyblue       | 133.0463 | 21.1203 | 0.903914 | 0.035234 | 107.052 |
| gi 115546696 dbj AK234534.1 | black         | 943.7573 | 98.1844 | 0.997325 | 0.000166 | 21.136  |
| gi 115546753 dbj AK237599.1 | darkred       | 241.7379 | 44.6765 | 0.99244  | 0.000788 | 47.154  |
| gi 115546780 dbj AK237626.1 | black         | 964.3285 | 94.4151 | 0.988777 | 0.001425 | 9.05    |
| gi 115546792 dbj AK237638.1 | black         | 950.2154 | 86.2763 | 0.971115 | 0.005868 | 13.312  |
| gi 115546833 dbj AK237679.1 | turquoise     | 411.7345 | 136.748 | 0.794284 | 0.108482 | 13.712  |
| gi 115546838 dbj AK237684.1 | blue          | 847.77   | 220.193 | 0.954784 | 0.011463 | 19.618  |
| gi 115546849 dbj AK237695.1 | turquoise     | 800.4459 | 248.556 | 0.963971 | 0.008165 | 19.636  |
| gi 115546853 dbj AK237699.1 | turquoise     | 437.6772 | 116.89  | 0.713627 | 0.175847 | 9.37    |
| gi 115546855 dbj AK237701.1 | blue          | 828.4999 | 229.545 | 0.964528 | 0.007977 | 7.67    |
| gi 115546868 dbj AK237714.1 | salmon        | 342.2607 | 39.7479 | 0.924595 | 0.024573 | 17.118  |
| gi 115546917 dbj AK240563.1 | turquoise     | 894.1529 | 249.434 | 0.96418  | 0.008094 | 95.612  |
| gi 115546929 dbj AK240575.1 | red           | 606.5861 | 105.49  | 0.989104 | 0.001363 | 34.718  |
| gi 115546934 dbj AK240580.1 | pink          | 244.8137 | 69.942  | 0.985007 | 0.002199 | 6.408   |
| gi 115546953 dbj AK240599.1 | blue          | 870.4838 | 210.646 | 0.944108 | 0.015728 | 10.15   |
| gi 115546978 dbj AK231033.1 | brown         | 240.5538 | 56.8374 | 0.889341 | 0.043448 | 18.204  |
| gi 115547033 dbj AK231088.1 | grey60        | 923.0691 | 62.4707 | 0.995597 | 0.00035  | 40.222  |
| gi 115547065 dbj AK231120.1 | green         | 76.38204 | 37.6942 | 0.818845 | 0.089999 | 56.944  |
| gi 115547094 dbj AK231149.1 | black         | 846.543  | 91.1403 | 0.981918 | 0.002911 | 15.298  |
| gi 115547117 dbj AK231172.1 | lightcyan     | 298.302  | 43.6231 | 0.986711 | 0.001835 | 27.044  |
| gi 115547124 dbj AK231179.1 | lightyellow   | 836.7745 | 59.1407 | 0.985512 | 0.002089 | 15.838  |
| gi 115547136 dbj AK231191.1 | salmon        | 206.1129 | 35.0655 | 0.898482 | 0.038232 | 9.39    |

|                             |            |          |         |          |          |         |
|-----------------------------|------------|----------|---------|----------|----------|---------|
| gi 115547142 dbj AK231197.1 | red        | 543.0336 | 109.199 | 0.996743 | 0.000223 | 290.914 |
| gi 115547167 dbj AK231222.1 | pink       | 264.1331 | 50.3171 | 0.869425 | 0.055518 | 4.764   |
| gi 115547176 dbj AK234549.1 | pink       | 84.70495 | 16.5444 | 0.293475 | 0.631771 | 12.538  |
| gi 115547198 dbj AK234571.1 | magenta    | 262.2151 | 81.9494 | 0.999016 | 3.71E-05 | 93.782  |
| gi 115547204 dbj AK234577.1 | red        | 679.7887 | 101.592 | 0.980033 | 0.003377 | 38.958  |
| gi 115547230 dbj AK234603.1 | green      | 104.2045 | 14.0299 | 0.06414  | 0.91839  | 52.162  |
| gi 115547231 dbj AK234604.1 | turquoise  | 355.79   | 121.707 | 0.771766 | 0.126313 | 29.948  |
| gi 115547242 dbj AK234615.1 | lightcyan  | 171.4165 | 11.362  | 0.455693 | 0.440552 | 4.45    |
| gi 115547251 dbj AK234624.1 | brown      | 152.5488 | 35.2737 | 0.686546 | 0.200466 | 8.65    |
| gi 115547260 dbj AK234633.1 | green      | 144.088  | 43.2869 | 0.886915 | 0.044868 | 66.394  |
| gi 115547282 dbj AK234655.1 | turquoise  | 571.6228 | 188.718 | 0.875824 | 0.051538 | 162.252 |
| gi 115547298 dbj AK234671.1 | yellow     | 304.1703 | 112.644 | 0.982854 | 0.002688 | 10.378  |
| gi 115547309 dbj AK234682.1 | grey60     | 971.7271 | 62.8244 | 0.996742 | 0.000223 | 4.054   |
| gi 115547320 dbj AK234693.1 | turquoise  | 846.3127 | 258.377 | 0.964948 | 0.007836 | 37.778  |
| gi 115547329 dbj AK234702.1 | purple     | 234.5094 | 20.0036 | -0.82846 | 0.083057 | 3.874   |
| gi 115547340 dbj AK234713.1 | turquoise  | 792.6436 | 238.284 | 0.936407 | 0.019066 | 34.074  |
| gi 115547352 dbj AK234725.1 | darkgrey   | 197.7737 | 34.431  | 0.994419 | 0.0005   | 16.86   |
| gi 115547361 dbj AK234734.1 | blue       | 807.1884 | 240.501 | 0.977654 | 0.003996 | 73.678  |
| gi 115547381 dbj AK237762.1 | turquoise  | 832.6571 | 255.197 | 0.962572 | 0.008643 | 28.276  |
| gi 115547397 dbj AK237778.1 | lightgreen | 280.3563 | 54.1712 | 0.974246 | 0.004942 | 4.154   |
| gi 115547403 dbj AK237784.1 | black      | 988.9575 | 94.2872 | 0.98825  | 0.001526 | 10.368  |
| gi 115547414 dbj AK237795.1 | skyblue    | 134.3369 | 24.2771 | 0.934058 | 0.020125 | 63.48   |
| gi 115547436 dbj AK237818.1 | salmon     | 119.5827 | 30.9916 | 0.869734 | 0.055323 | 23.016  |
| gi 115547445 dbj AK237827.1 | yellow     | 249.8617 | 90.652  | 0.928341 | 0.022778 | 113.398 |
| gi 115547450 dbj AK237832.1 | pink       | 268.8571 | 74.9737 | 0.996899 | 0.000207 | 3.81    |
| gi 115547470 dbj AK237852.1 | lightgreen | 296.5663 | 60.5769 | 0.996981 | 0.000199 | 5.428   |
| gi 115547485 dbj AK237867.1 | green      | 128.4295 | 48.8709 | 0.923958 | 0.024883 | 63.624  |
| gi 115547488 dbj AK237870.1 | blue       | 950.5163 | 228.86  | 0.966633 | 0.00728  | 27.684  |
| gi 115547522 dbj AK237904.1 | salmon     | 180.4767 | 46.6103 | 0.970895 | 0.005934 | 68.606  |
| gi 115547541 dbj AK237923.1 | white      | 940.8706 | 29.5292 | 0.806336 | 0.099282 | 1362.92 |
| gi 115547575 dbj AK231233.1 | salmon     | 122.2765 | 30.4122 | 0.862935 | 0.059647 | 26.406  |
| gi 115547631 dbj AK231289.1 | turquoise  | 314.0808 | 97.7356 | 0.684465 | 0.202395 | 3.944   |
| gi 115547636 dbj AK231294.1 | brown      | 67.21735 | 18.074  | 0.313933 | 0.606954 | 27.666  |
| gi 115547667 dbj AK231325.1 | blue       | 916.6297 | 254.466 | 0.992134 | 0.000836 | 10.728  |
| gi 115547679 dbj AK231337.1 | turquoise  | 893.1742 | 268.723 | 0.984111 | 0.002399 | 33.386  |
| gi 115547688 dbj AK231346.1 | brown      | 173.3179 | 28.782  | 0.642805 | 0.242065 | 3.834   |
| gi 115547715 dbj AK231373.1 | yellow     | 298.3635 | 115.675 | 0.991538 | 0.000933 | 1.958   |
| gi 115547725 dbj AK231383.1 | brown      | 165.2087 | 46.1502 | 0.782109 | 0.118022 | 3.388   |
| gi 115547754 dbj AK231412.1 | brown      | 124.6842 | 45.0739 | 0.90012  | 0.037319 | 15.974  |
| gi 115547780 dbj AK234756.1 | magenta    | 245.8961 | 75.9633 | 0.981486 | 0.003016 | 2.278   |
| gi 115547797 dbj AK234773.1 | pink       | 158.5564 | 35.5263 | 0.829706 | 0.08217  | 70.322  |
| gi 115547803 dbj AK234779.1 | tan        | 878.8946 | 58.16   | 0.963613 | 0.008287 | 64.818  |
| gi 115547837 dbj AK234813.1 | darkred    | 210.9647 | 38.5036 | 0.95003  | 0.013308 | 2.19    |
| gi 115547849 dbj AK234825.1 | blue       | 786.3205 | 214.686 | 0.948625 | 0.01387  | 18.802  |
| gi 115547856 dbj AK234832.1 | turquoise  | 636.548  | 206.191 | 0.8836   | 0.046831 | 9.67    |
| gi 115547861 dbj AK234837.1 | turquoise  | 465.1628 | 155.377 | 0.81035  | 0.096273 | 25.77   |
| gi 115547869 dbj AK234845.1 | turquoise  | 785.908  | 249.821 | 0.938797 | 0.018008 | 5.402   |
| gi 115547882 dbj AK234858.1 | pink       | 260.9985 | 49.8052 | 0.885208 | 0.045875 | 31.138  |

|                             |               |          |         |          |          |         |
|-----------------------------|---------------|----------|---------|----------|----------|---------|
| gi 115547885 dbj AK234861.1 | blue          | 837.5793 | 246.203 | 0.983832 | 0.002462 | 24.06   |
| gi 115547886 dbj AK234862.1 | salmon        | 134.5117 | 42.387  | 0.947235 | 0.014434 | 13.128  |
| gi 115547910 dbj AK234886.1 | blue          | 897.7562 | 245.525 | 0.981796 | 0.00294  | 13.75   |
| gi 115547932 dbj AK234909.1 | skyblue       | 193.5653 | 28.3261 | 0.96578  | 0.00756  | 58.084  |
| gi 115547985 dbj AK237969.1 | lightgreen    | 292.2377 | 60.4715 | 0.996599 | 0.000238 | 21.056  |
| gi 115548000 dbj AK237984.1 | pink          | 157.5735 | 44.6556 | 0.88067  | 0.048588 | 21.44   |
| gi 115548002 dbj AK237986.1 | turquoise     | 458.9062 | 152.636 | 0.79921  | 0.104692 | 240.994 |
| gi 115548018 dbj AK238002.1 | blue          | 710.4827 | 136.22  | 0.850235 | 0.06799  | 12.28   |
| gi 115548040 dbj AK238024.1 | yellow        | 304.1454 | 114.138 | 0.985969 | 0.001991 | 6.882   |
| gi 115548067 dbj AK238051.1 | magenta       | 242.79   | 75.5173 | 0.979924 | 0.003404 | 0.838   |
| gi 115548072 dbj AK238056.1 | yellowgreen   | 151.1501 | 13.4218 | 0.915506 | 0.029106 | 28.904  |
| gi 115548078 dbj AK238062.1 | turquoise     | 711.5019 | 232.748 | 0.914911 | 0.029412 | 6.252   |
| gi 115548084 dbj AK238068.1 | darkred       | 231.1805 | 43.0626 | 0.980214 | 0.003331 | 1.974   |
| gi 115548129 dbj AK238113.1 | lightgreen    | 284.6887 | 55.2378 | 0.978232 | 0.003843 | 1.348   |
| gi 115548136 dbj AK238120.1 | magenta       | 261.5381 | 82.2245 | 0.999435 | 1.61E-05 | 4.538   |
| gi 115548176 dbj AK234948.1 | darkred       | 223.5542 | 42.1033 | 0.972725 | 0.005385 | 288.41  |
| gi 115548199 dbj AK231509.1 | lightyellow   | 976.7888 | 63.0267 | 0.998349 | 8.05E-05 | 3.03    |
| gi 115548219 dbj AK231529.1 | salmon        | 279.3737 | 43.6617 | 0.948602 | 0.01388  | 34.414  |
| gi 115548236 dbj AK231450.1 | salmon        | 168.4087 | 39.4309 | 0.928426 | 0.022738 | 10.44   |
| gi 115548239 dbj AK231453.1 | turquoise     | 278.4469 | 74.775  | 0.635921 | 0.248804 | 3.7     |
| gi 115548250 dbj AK231464.1 | turquoise     | 250.1933 | 56.272  | 0.519921 | 0.369185 | 1.102   |
| gi 115548260 dbj AK231474.1 | pink          | 268.12   | 74.5955 | 0.992336 | 0.000805 | 2.906   |
| gi 115548298 dbj AK234955.1 | turquoise     | 618.3075 | 169.88  | 0.853635 | 0.065723 | 12.406  |
| gi 115548312 dbj AK234969.1 | darkred       | 246.3942 | 40.1709 | 0.971182 | 0.005847 | 2.794   |
| gi 115548314 dbj AK234971.1 | turquoise     | 472.649  | 140.008 | 0.784258 | 0.11632  | 29.092  |
| gi 115548316 dbj AK234973.1 | salmon        | 213.5464 | 47.154  | 0.972704 | 0.005391 | 31.104  |
| gi 115548319 dbj AK231543.1 | purple        | 168.4467 | 14.8038 | 0.749176 | 0.144988 | 35.766  |
| gi 115548323 dbj AK231696.1 | royalblue     | 244.0151 | 19.6236 | 0.863031 | 0.059585 | 3.174   |
| gi 115548328 dbj AK231701.1 | tan           | 968.0973 | 62.1502 | 0.97545  | 0.0046   | 16.754  |
| gi 115548334 dbj AK231707.1 | darkmagenta   | 907.4808 | 25.3476 | 0.981546 | 0.003001 | 32.212  |
| gi 115548360 dbj AK231733.1 | turquoise     | 945.3265 | 265.344 | 0.985177 | 0.002161 | 83.992  |
| gi 115548373 dbj AK234990.1 | yellow        | 236.7548 | 87.2751 | 0.920286 | 0.026692 | 1.904   |
| gi 115548383 dbj AK235000.1 | navy          | 315.6853 | 28.7249 | 0.842823 | 0.073014 | 18.1    |
| gi 115548388 dbj AK235005.1 | darkturquoise | 199.9848 | 29.4568 | 0.953033 | 0.012132 | 52.566  |
| gi 115548389 dbj AK235006.1 | greenyellow   | 177.5431 | 51.3602 | 0.980201 | 0.003334 | 12.686  |
| gi 115548394 dbj AK235011.1 | turquoise     | 843.3251 | 229.613 | 0.943713 | 0.015895 | 29.02   |
| gi 115548406 dbj AK235023.1 | lightgreen    | 290.8829 | 60.4517 | 0.996508 | 0.000248 | 1.884   |
| gi 115548409 dbj AK235026.1 | blue          | 841.546  | 227.462 | 0.964851 | 0.007869 | 25.496  |
| gi 115548413 dbj AK235030.1 | pink          | 251.1565 | 51.4356 | 0.887242 | 0.044676 | 4.938   |
| gi 115548441 dbj AK235058.1 | turquoise     | 594.0615 | 189.104 | 0.888743 | 0.043797 | 81.064  |
| gi 115548454 dbj AK235071.1 | pink          | 261.0986 | 55.2476 | 0.903136 | 0.035658 | 10.506  |
| gi 115548459 dbj AK235076.1 | yellow        | 277.4683 | 104.491 | 0.965394 | 0.007687 | 4.614   |
| gi 115548467 dbj AK235084.1 | blue          | 812.3443 | 232.714 | 0.967234 | 0.007085 | 153.802 |
| gi 115548500 dbj AK235117.1 | turquoise     | 493.9496 | 105.279 | 0.736119 | 0.156121 | 68.666  |
| gi 115548514 dbj AK235131.1 | grey60        | 954.5899 | 62.9605 | 0.99719  | 0.000179 | 81.826  |
| gi 115548519 dbj AK235136.1 | brown         | 86.75561 | 25.6935 | 0.479767 | 0.41346  | 10.68   |
| gi 115548520 dbj AK235137.1 | navy          | 158.5952 | 11.6243 | -0.49351 | 0.398175 | 38.198  |
| gi 115548526 dbj AK235143.1 | turquoise     | 906.1215 | 267.172 | 0.980388 | 0.003287 | 20.914  |

|                             |               |          |         |          |          |         |
|-----------------------------|---------------|----------|---------|----------|----------|---------|
| gi 115548564 dbj AK231548.1 | greenyellow   | 151.6976 | 45.648  | 0.955925 | 0.011034 | 108.752 |
| gi 115548572 dbj AK231556.1 | black         | 857.8768 | 82.1847 | 0.961473 | 0.009025 | 52.83   |
| gi 115548574 dbj AK231558.1 | red           | 631.6646 | 105.145 | 0.987978 | 0.001579 | 659.306 |
| gi 115548620 dbj AK231604.1 | red           | 623.1132 | 93.4894 | 0.961142 | 0.009141 | 59.15   |
| gi 115548658 dbj AK231642.1 | white         | 954.4238 | 29.6026 | 0.812959 | 0.094333 | 117.946 |
| gi 115548698 dbj AK231683.1 | pink          | 160.3433 | 48.6355 | 0.902857 | 0.035811 | 75.034  |
| gi 115548706 dbj AK231691.1 | white         | 966.8351 | 29.591  | 0.801982 | 0.102577 | 79.55   |
| gi 115548717 dbj AK231783.1 | blue          | 751.9026 | 224.225 | 0.957692 | 0.01038  | 624.288 |
| gi 115548727 dbj AK231793.1 | paleturquoise | 152.8818 | 15.0875 | 0.882949 | 0.04722  | 16.66   |
| gi 115548749 dbj AK231815.1 | yellow        | 308.9098 | 116.761 | 0.992666 | 0.000753 | 1.524   |
| gi 115548797 dbj AK231755.1 | blue          | 397.2048 | 108.018 | 0.799763 | 0.104269 | 42.66   |
| gi 115548800 dbj AK231758.1 | grey          | 145.2098 | 7.437   | -0.81405 | 0.093524 | 43.676  |
| gi 115548801 dbj AK231759.1 | green         | 132.7411 | 55.9277 | 0.97414  | 0.004973 | 39.982  |
| gi 115548802 dbj AK231760.1 | royalblue     | 346.4589 | 32.1526 | 0.99111  | 0.001005 | 4.25    |
| gi 115548807 dbj AK231765.1 | green         | 134.9466 | 53.362  | 0.962254 | 0.008753 | 23.578  |
| gi 115548828 dbj AK231943.1 | darkgrey      | 92.20749 | 11.8229 | 0.736261 | 0.155998 | 10.808  |
| gi 115548831 dbj AK231946.1 | blue          | 753.5197 | 144.778 | 0.865282 | 0.058143 | 21.198  |
| gi 115548849 dbj AK235252.1 | red           | 449.3912 | 83.2272 | 0.936758 | 0.018909 | 19.668  |
| gi 115548852 dbj AK235255.1 | black         | 862.3985 | 90.056  | 0.979475 | 0.003519 | 45.962  |
| gi 115548861 dbj AK235264.1 | turquoise     | 930.1558 | 272.171 | 0.99066  | 0.001082 | 12.358  |
| gi 115548869 dbj AK235272.1 | magenta       | 231.1298 | 65.1831 | 0.94982  | 0.013392 | 1.936   |
| gi 115548882 dbj AK235285.1 | sienna3       | 996.3204 | 25.4324 | 0.994685 | 0.000465 | 116.038 |
| gi 115548922 dbj AK235325.1 | lightyellow   | 998.988  | 59.7048 | 0.987314 | 0.001712 | 249.932 |
| gi 115548932 dbj AK235335.1 | greenyellow   | 158.3638 | 43.6342 | 0.939069 | 0.017889 | 36.414  |
| gi 115548933 dbj AK235336.1 | blue          | 604.4051 | 159.475 | 0.888773 | 0.043779 | 15.342  |
| gi 115548942 dbj AK235345.1 | grey60        | 855.0403 | 58.3252 | 0.981567 | 0.002996 | 12.862  |
| gi 115548954 dbj AK235357.1 | violet        | 994.8504 | 70.7411 | 0.986701 | 0.001837 | 12.426  |
| gi 115548955 dbj AK235358.1 | blue          | 966.8243 | 228.748 | 0.969454 | 0.006379 | 69.436  |
| gi 115548956 dbj AK235359.1 | salmon        | 111.7009 | 24.7117 | 0.809755 | 0.096717 | 11.132  |
| gi 115548992 dbj AK238181.1 | navy          | 234.7612 | 24.698  | 0.686987 | 0.200057 | 1.166   |
| gi 115549006 dbj AK238195.1 | darkturquoise | 186.2899 | 34.294  | 0.990652 | 0.001083 | 1.142   |
| gi 115549015 dbj AK238204.1 | blue          | 773.951  | 195.958 | 0.930729 | 0.021657 | 2.036   |
| gi 115549057 dbj AK238246.1 | blue          | 674.9137 | 200.39  | 0.935135 | 0.019637 | 20.384  |
| gi 115549078 dbj AK238267.1 | blue          | 870.9231 | 240.944 | 0.976039 | 0.004436 | 40.996  |
| gi 115549145 dbj AK238334.1 | violet        | 892.8452 | 72.0224 | 0.990452 | 0.001118 | 6.634   |
| gi 115549177 dbj AK231853.1 | navy          | 260.9165 | 33.6693 | 0.883428 | 0.046934 | 25.522  |
| gi 115549179 dbj AK231855.1 | turquoise     | 691.1547 | 226.283 | 0.901855 | 0.036361 | 19.92   |
| gi 115549199 dbj AK231875.1 | midnightblue  | 94.91706 | 36.36   | 0.94485  | 0.015418 | 3.252   |
| gi 115549229 dbj AK231905.1 | blue          | 945.0469 | 208.274 | 0.948127 | 0.014071 | 34.112  |
| gi 115549239 dbj AK231915.1 | blue          | 759.0744 | 221.676 | 0.959548 | 0.009707 | 64.518  |
| gi 115549243 dbj AK231919.1 | yellow        | 225.0531 | 71.1579 | 0.88306  | 0.047153 | 38.602  |
| gi 115549251 dbj AK231927.1 | lightgreen    | 261.8019 | 55.2131 | 0.978086 | 0.003881 | 1.202   |
| gi 115549258 dbj AK235178.1 | blue          | 501.8225 | 124.261 | 0.82831  | 0.083164 | 18.052  |
| gi 115549275 dbj AK235196.1 | purple        | 191.6127 | 18.2567 | -0.90128 | 0.036677 | 20.604  |
| gi 115549299 dbj AK235220.1 | darkgreen     | 203.657  | 31.3202 | 0.935871 | 0.019306 | 58.818  |
| gi 115549311 dbj AK235232.1 | brown         | 161.23   | 54.3468 | 0.910591 | 0.031659 | 17.828  |
| gi 115549313 dbj AK235234.1 | turquoise     | 345.5065 | 112.105 | 0.722802 | 0.167718 | 133.966 |
| gi 115549331 dbj AK232109.1 | green         | 96.98978 | 52.838  | 0.94875  | 0.01382  | 259.438 |



|                             |               |          |         |          |          |         |
|-----------------------------|---------------|----------|---------|----------|----------|---------|
| gi 115549349 dbj AK232127.1 | magenta       | 242.5931 | 74.1946 | 0.976704 | 0.004253 | 72.732  |
| gi 115549356 dbj AK235378.1 | green         | 79.69863 | 39.1105 | 0.837336 | 0.076803 | 15.294  |
| gi 115549358 dbj AK235380.1 | purple        | 92.72455 | 14.7511 | 0.924156 | 0.024786 | 20.488  |
| gi 115549368 dbj AK235390.1 | blue          | 811.1277 | 240.5   | 0.976251 | 0.004378 | 11.026  |
| gi 115549412 dbj AK235434.1 | red           | 381.5619 | 91.2418 | 0.957197 | 0.010562 | 37.732  |
| gi 115549416 dbj AK235438.1 | darkred       | 261.3548 | 43.4147 | 0.987103 | 0.001755 | 5.608   |
| gi 115549428 dbj AK235450.1 | navy          | 202.2337 | 28.4345 | 0.779016 | 0.120484 | 114.948 |
| gi 115549440 dbj AK235462.1 | pink          | 114.7023 | 15.9667 | 0.520745 | 0.368288 | 185.522 |
| gi 115549451 dbj AK235473.1 | blue          | 711.9039 | 144.325 | 0.861307 | 0.060697 | 8.32    |
| gi 115549474 dbj AK235496.1 | tan           | 929.1246 | 67.1243 | 0.992529 | 0.000774 | 17.24   |
| gi 115549475 dbj AK235497.1 | purple        | 134.0766 | 18.6288 | 0.88781  | 0.044342 | 86.376  |
| gi 115549482 dbj AK235504.1 | darkturquoise | 202.1029 | 34.8602 | 0.996331 | 0.000267 | 3.16    |
| gi 115549486 dbj AK235508.1 | turquoise     | 602.2265 | 196.354 | 0.886757 | 0.044961 | 10.304  |
| gi 115549499 dbj AK235521.1 | blue          | 622.8935 | 187.931 | 0.919029 | 0.02732  | 14.9    |
| gi 115549531 dbj AK235553.1 | blue          | 452.9185 | 92.012  | 0.767906 | 0.129449 | 71.346  |
| gi 115549536 dbj AK235558.1 | lightyellow   | 989.9905 | 62.6525 | 0.99711  | 0.000186 | 9.398   |
| gi 115549537 dbj AK235559.1 | turquoise     | 270.0394 | 90.7031 | 0.661759 | 0.223773 | 13.35   |
| gi 115549542 dbj AK235564.1 | red           | 444.1723 | 100.375 | 0.97825  | 0.003838 | 14.096  |
| gi 115549562 dbj AK238370.1 | yellow        | 261.3789 | 97.8563 | 0.949622 | 0.01347  | 4.296   |
| gi 115549583 dbj AK238391.1 | magenta       | 242.0406 | 72.5592 | 0.971415 | 0.005777 | 4.038   |
| gi 115549608 dbj AK238416.1 | turquoise     | 924.8418 | 266.387 | 0.981034 | 0.003126 | 73.748  |
| gi 115549613 dbj AK238421.1 | brown         | 184.3989 | 25.5085 | 0.581893 | 0.303355 | 20.89   |
| gi 115549680 dbj AK231959.1 | red           | 478.4255 | 105.566 | 0.989193 | 0.001347 | 34.546  |
| gi 115549689 dbj AK231968.1 | green         | 106.8809 | 53.2789 | 0.953204 | 0.012066 | 71.21   |
| gi 115549696 dbj AK231975.1 | blue          | 924.1589 | 238.496 | 0.97457  | 0.004849 | 24.328  |
| gi 115549709 dbj AK231988.1 | blue          | 725.8977 | 194.568 | 0.925786 | 0.023998 | 14.938  |
| gi 115549710 dbj AK231989.1 | yellow        | 178.0537 | 49.2457 | 0.778286 | 0.121067 | 15.528  |
| gi 115549744 dbj AK232023.1 | grey          | 157.8776 | 14.0708 | -0.91419 | 0.029782 | 353.304 |
| gi 115549779 dbj AK232059.1 | black         | 931.783  | 95.8576 | 0.991989 | 0.00086  | 16.086  |
| gi 115549787 dbj AK232067.1 | skyblue       | 285.1381 | 30.7526 | 0.981894 | 0.002917 | 102.95  |
| gi 115549809 dbj AK232089.1 | blue          | 941.1333 | 219.263 | 0.956314 | 0.010889 | 27.454  |
| gi 115549835 dbj AK238495.1 | lightcyan     | 130.0041 | 13.4058 | 0.740986 | 0.151943 | 8.206   |
| gi 115549846 dbj AK238506.1 | blue          | 679.7605 | 166.469 | 0.889174 | 0.043545 | 50.642  |
| gi 115549856 dbj AK238516.1 | turquoise     | 509.2793 | 171.646 | 0.806416 | 0.099222 | 23.284  |
| gi 115549861 dbj AK238521.1 | violet        | 943.4591 | 74.2854 | 0.996718 | 0.000226 | 5.836   |
| gi 115549895 dbj AK238555.1 | blue          | 889.1014 | 203.115 | 0.938955 | 0.017939 | 11.572  |
| gi 115549900 dbj AK232134.1 | blue          | 916.1949 | 216.176 | 0.95257  | 0.012311 | 52.966  |
| gi 115549949 dbj AK232184.1 | turquoise     | 500.8335 | 130.432 | 0.768594 | 0.128889 | 147.104 |
| gi 115549956 dbj AK232191.1 | yellow        | 307.2455 | 119.093 | 0.99834  | 8.11E-05 | 4.36    |
| gi 115549963 dbj AK232198.1 | turquoise     | 912.3992 | 269.988 | 0.990629 | 0.001088 | 46.164  |
| gi 115549970 dbj AK232205.1 | tan           | 982.083  | 66.0234 | 0.989119 | 0.00136  | 120.272 |
| gi 115549997 dbj AK232232.1 | navy          | 159.9458 | 34.1656 | 0.935271 | 0.019576 | 1.826   |
| gi 115550002 dbj AK232237.1 | yellow        | 286.0176 | 108.05  | 0.974162 | 0.004966 | 93.578  |
| gi 115550007 dbj AK232242.1 | navy          | 198.2592 | 10.0732 | -0.43974 | 0.45871  | 165.38  |
| gi 115550036 dbj AK232271.1 | grey60        | 974.7402 | 61.1683 | 0.991363 | 0.000962 | 100.97  |
| gi 115550039 dbj AK232274.1 | greenyellow   | 239.4053 | 39.9682 | 0.910244 | 0.031842 | 58.802  |
| gi 115550042 dbj AK232277.1 | turquoise     | 903.8186 | 264.204 | 0.977898 | 0.003931 | 65.692  |
| gi 115550054 dbj AK232289.1 | brown         | 205.4739 | 61.8998 | 0.885803 | 0.045523 | 8.854   |

|                             |              |          |         |          |          |         |
|-----------------------------|--------------|----------|---------|----------|----------|---------|
| gi 115550058 dbj AK232293.1 | yellow       | 270.3195 | 101.497 | 0.956105 | 0.010967 | 11.884  |
| gi 115550060 dbj AK232295.1 | brown        | 58.41663 | 20.1914 | 0.44089  | 0.457399 | 45.516  |
| gi 115550075 dbj AK232310.1 | yellow       | 301.2688 | 111.843 | 0.980687 | 0.003212 | 3.592   |
| gi 115550091 dbj AK232326.1 | turquoise    | 801.173  | 245.614 | 0.964541 | 0.007973 | 2.308   |
| gi 115550101 dbj AK235580.1 | darkorange   | 171.9391 | 18.892  | 0.924166 | 0.024782 | 22.946  |
| gi 115550102 dbj AK235581.1 | pink         | 226.2885 | 48.5423 | 0.870174 | 0.055047 | 6.71    |
| gi 115550120 dbj AK235599.1 | lightyellow  | 993.3209 | 62.4218 | 0.996378 | 0.000261 | 28.626  |
| gi 115550124 dbj AK235603.1 | lightcyan    | 296.4573 | 43.6132 | 0.982133 | 0.002859 | 398.826 |
| gi 115550125 dbj AK235604.1 | magenta      | 212.3018 | 61.5493 | 0.93631  | 0.019109 | 3.838   |
| gi 115550130 dbj AK235609.1 | pink         | 260.7483 | 63.2365 | 0.942504 | 0.016406 | 5.992   |
| gi 115550133 dbj AK235612.1 | turquoise    | 888.6248 | 265.155 | 0.979319 | 0.003559 | 93.032  |
| gi 115550140 dbj AK235619.1 | brown        | 170.839  | 54.7579 | 0.857802 | 0.062978 | 44.328  |
| gi 115550155 dbj AK235634.1 | blue         | 860.7678 | 242.939 | 0.979336 | 0.003555 | 28.85   |
| gi 115550159 dbj AK235638.1 | turquoise    | 639.7739 | 183.474 | 0.886901 | 0.044876 | 41.044  |
| gi 115550165 dbj AK235644.1 | turquoise    | 712.8653 | 223.043 | 0.933972 | 0.020164 | 47.054  |
| gi 115550185 dbj AK235664.1 | blue         | 859.4541 | 223.899 | 0.963245 | 0.008412 | 14.786  |
| gi 115550186 dbj AK235665.1 | blue         | 823.2751 | 232.544 | 0.973    | 0.005304 | 26.35   |
| gi 115550191 dbj AK235670.1 | violet       | 894.314  | 73.2338 | 0.993754 | 0.000592 | 13.352  |
| gi 115550210 dbj AK235689.1 | navy         | 332.4593 | 28.8949 | 0.796384 | 0.106862 | 19.652  |
| gi 115550254 dbj AK235733.1 | tan          | 628.3503 | 43.8202 | 0.904887 | 0.034706 | 29.846  |
| gi 115550257 dbj AK235736.1 | navy         | 186.2613 | 26.2964 | 0.745424 | 0.148162 | 31.158  |
| gi 115550270 dbj AK235749.1 | brown        | 151.5569 | 41.1752 | 0.76726  | 0.129977 | 5.11    |
| gi 115550272 dbj AK235751.1 | blue         | 827.501  | 241.26  | 0.978839 | 0.003683 | 71.904  |
| gi 115550273 dbj AK235752.1 | turquoise    | 666.4311 | 213.115 | 0.89529  | 0.040029 | 20.882  |
| gi 115550292 dbj AK235771.1 | royalblue    | 167.2402 | 5.95102 | 0.322061 | 0.597143 | 41.182  |
| gi 115550321 dbj AK238586.1 | tan          | 971.165  | 58.4439 | 0.962695 | 0.008601 | 29.312  |
| gi 115550332 dbj AK238597.1 | white        | 970.6104 | 29.2709 | 0.801486 | 0.102954 | 87.356  |
| gi 115550354 dbj AK238619.1 | orange       | 348.3342 | 22.1081 | 0.896843 | 0.039151 | 92.03   |
| gi 115550357 dbj AK238622.1 | violet       | 940.9664 | 74.2577 | 0.996635 | 0.000234 | 47.656  |
| gi 115550392 dbj AK238657.1 | darkgrey     | 194.5203 | 31.9121 | 0.973001 | 0.005304 | 16.404  |
| gi 115550394 dbj AK238659.1 | yellow       | 242.1995 | 81.6177 | 0.913878 | 0.029944 | 12.71   |
| gi 115550410 dbj AK238675.1 | greenyellow  | 246.3131 | 38.4086 | 0.907564 | 0.033264 | 4.112   |
| gi 115550429 dbj AK238694.1 | blue         | 812.7665 | 214.733 | 0.946906 | 0.014568 | 32.736  |
| gi 115550430 dbj AK238695.1 | greenyellow  | 172.3416 | 51.0166 | 0.980568 | 0.003242 | 20.708  |
| gi 115550441 dbj AK238706.1 | darkgrey     | 180.073  | 33.294  | 0.98272  | 0.00272  | 12.546  |
| gi 115550443 dbj AK238708.1 | turquoise    | 937.6827 | 269.198 | 0.986133 | 0.001956 | 14.814  |
| gi 115550448 dbj AK238713.1 | green        | 87.64738 | 47.5935 | 0.89285  | 0.04142  | 54.756  |
| gi 115550486 dbj AK238751.1 | royalblue    | 77.28413 | 4.39888 | 0.354252 | 0.558572 | 2.502   |
| gi 115550510 dbj AK232340.1 | pink         | 266.302  | 74.8206 | 0.992469 | 0.000784 | 5.184   |
| gi 115550524 dbj AK232354.1 | midnightblue | 140.3301 | 44.0642 | 0.979447 | 0.003526 | 51.776  |
| gi 115550537 dbj AK232367.1 | turquoise    | 743.5039 | 214.464 | 0.930248 | 0.021881 | 15.042  |
| gi 115550567 dbj AK232397.1 | green        | 92.41745 | 38.8658 | 0.847769 | 0.069649 | 13.95   |
| gi 115550593 dbj AK232423.1 | green        | 94.29774 | 42.7241 | 0.853552 | 0.065778 | 112.958 |
| gi 115550595 dbj AK232425.1 | blue         | 838.7341 | 238.401 | 0.977556 | 0.004023 | 7.578   |
| gi 115550607 dbj AK232437.1 | green        | 131.1045 | 43.1649 | 0.888398 | 0.043998 | 51.112  |
| gi 115550650 dbj AK232480.1 | yellow       | 268.5106 | 92.1955 | 0.943694 | 0.015902 | 0.858   |
| gi 115550656 dbj AK232486.1 | blue         | 879.4224 | 251.236 | 0.986924 | 0.001791 | 50.32   |
| gi 115550661 dbj AK232491.1 | greenyellow  | 85.32788 | 3.37045 | 0.379788 | 0.528329 | 9.178   |

|                             |               |          |         |          |          |         |
|-----------------------------|---------------|----------|---------|----------|----------|---------|
| gi 115550668 dbj AK232498.1 | lightyellow   | 993.6362 | 61.5109 | 0.993372 | 0.000647 | 6.636   |
| gi 115550708 dbj AK235782.1 | red           | 382.2551 | 90.5215 | 0.956063 | 0.010982 | 61.082  |
| gi 115550716 dbj AK235790.1 | blue          | 473.5696 | 137.549 | 0.852966 | 0.066167 | 7.454   |
| gi 115550732 dbj AK235806.1 | magenta       | 277.1026 | 76.521  | 0.983326 | 0.002578 | 19.134  |
| gi 115550746 dbj AK235820.1 | brown         | 146.6268 | 49.5569 | 0.875053 | 0.052013 | 6.298   |
| gi 115550755 dbj AK235829.1 | blue          | 745.3742 | 207.903 | 0.94505  | 0.015335 | 30.008  |
| gi 115550758 dbj AK235833.1 | turquoise     | 716.1467 | 196.067 | 0.905068 | 0.034608 | 33.16   |
| gi 115550768 dbj AK235843.1 | blue          | 585.7865 | 141.108 | 0.858639 | 0.062431 | 25.462  |
| gi 115550785 dbj AK235860.1 | skyblue       | 385.2774 | 24.3818 | 0.923699 | 0.025009 | 32.598  |
| gi 115550806 dbj AK235881.1 | blue          | 792.2042 | 236.329 | 0.972502 | 0.005451 | 24.862  |
| gi 115550812 dbj AK235887.1 | black         | 917.6768 | 76.4815 | 0.946994 | 0.014532 | 7.918   |
| gi 115550819 dbj AK235894.1 | grey60        | 981.1711 | 59.9666 | 0.987209 | 0.001733 | 16.17   |
| gi 115550826 dbj AK235901.1 | purple        | 154.6908 | 14.4257 | -0.58352 | 0.301675 | 10.726  |
| gi 115550838 dbj AK235913.1 | orange        | 506.2526 | 34.0528 | 0.989849 | 0.001226 | 96.458  |
| gi 115550848 dbj AK235923.1 | magenta       | 257.2871 | 77.1137 | 0.98658  | 0.001862 | 226.978 |
| gi 115550868 dbj AK235943.1 | turquoise     | 866.0266 | 252.042 | 0.974367 | 0.004908 | 10.982  |
| gi 115550874 dbj AK235949.1 | turquoise     | 542.5831 | 137.656 | 0.780638 | 0.119191 | 28.276  |
| gi 115550888 dbj AK235963.1 | green         | 149.5765 | 20.5744 | 0.202997 | 0.743322 | 6.348   |
| gi 115550889 dbj AK235964.1 | yellowgreen   | 173.1299 | 18.5715 | 0.996117 | 0.00029  | 99.902  |
| gi 115550900 dbj AK238761.1 | salmon        | 137.109  | 40.0767 | 0.931376 | 0.021356 | 23.988  |
| gi 115550915 dbj AK238776.1 | turquoise     | 809.9299 | 256.968 | 0.951393 | 0.01277  | 5       |
| gi 115550943 dbj AK238804.1 | white         | 181.3868 | 23.9347 | 0.785164 | 0.115606 | 20.094  |
| gi 115550946 dbj AK238807.1 | black         | 925.8152 | 85.3792 | 0.968754 | 0.006599 | 29.456  |
| gi 115550960 dbj AK238821.1 | salmon        | 174.5931 | 34.5304 | 0.899028 | 0.037927 | 11.638  |
| gi 115550961 dbj AK238822.1 | turquoise     | 728.9321 | 237.557 | 0.926679 | 0.023569 | 40.53   |
| gi 115550973 dbj AK238834.1 | yellow        | 237.8177 | 80.4806 | 0.903986 | 0.035195 | 4.23    |
| gi 115550975 dbj AK238836.1 | blue          | 959.7864 | 230.688 | 0.969811 | 0.006268 | 135.068 |
| gi 115550976 dbj AK238837.1 | turquoise     | 915.2142 | 262.846 | 0.977016 | 0.004168 | 32.328  |
| gi 115550999 dbj AK238860.1 | royalblue     | 371.8338 | 33.1956 | 0.998834 | 4.78E-05 | 33.63   |
| gi 115551001 dbj AK238862.1 | turquoise     | 269.2456 | 63.6128 | 0.514075 | 0.375557 | 255.718 |
| gi 115551006 dbj AK238867.1 | tan           | 971.5925 | 66.8404 | 0.991471 | 0.000944 | 13.51   |
| gi 115551027 dbj AK238888.1 | darkred       | 224.4293 | 32.3476 | 0.919933 | 0.026867 | 14.12   |
| gi 115551063 dbj AK238924.1 | navy          | 94.89498 | 7.75132 | 0.328591 | 0.58928  | 32.512  |
| gi 115551074 dbj AK238935.1 | grey          | 163.8936 | 13.7543 | -0.91695 | 0.02837  | 12.158  |
| gi 115551086 dbj AK238947.1 | lightgreen    | 289.7937 | 58.9529 | 0.991397 | 0.000957 | 1.67    |
| gi 115551105 dbj AK232538.1 | turquoise     | 843.7329 | 252.679 | 0.96962  | 0.006328 | 26.33   |
| gi 115551122 dbj AK232555.1 | pink          | 87.01946 | 24.8745 | 0.639572 | 0.245224 | 64.684  |
| gi 115551124 dbj AK232557.1 | red           | 392.1143 | 78.9708 | 0.926014 | 0.023888 | 10.42   |
| gi 115551148 dbj AK232581.1 | paleturquoise | 136.4001 | 16.5299 | 0.904667 | 0.034825 | 39.002  |
| gi 115551177 dbj AK232610.1 | yellowgreen   | 146.6702 | 13.0903 | 0.917571 | 0.028055 | 35.448  |
| gi 115551181 dbj AK232614.1 | turquoise     | 623.366  | 204.538 | 0.892884 | 0.041401 | 53.052  |
| gi 115551189 dbj AK232622.1 | black         | 948.1935 | 96.899  | 0.994113 | 0.000542 | 16.154  |
| gi 115551213 dbj AK232646.1 | violet        | 981.0275 | 74.1176 | 0.996227 | 0.000278 | 8.91    |
| gi 115551216 dbj AK232649.1 | turquoise     | 430.5099 | 109.16  | 0.721794 | 0.168607 | 27.212  |
| gi 115551255 dbj AK232688.1 | grey60        | 839.5711 | 57.3831 | 0.978333 | 0.003816 | 15.008  |
| gi 115551270 dbj AK232704.1 | lightyellow   | 972.6258 | 63.2578 | 0.999097 | 3.26E-05 | 1533.93 |
| gi 115551283 dbj AK232717.1 | pink          | 185.9861 | 2.62084 | -0.70383 | 0.184647 | 79.16   |
| gi 115551304 dbj AK235982.1 | lightyellow   | 979.2843 | 63.1712 | 0.9988   | 4.99E-05 | 12.236  |

|                             |               |          |         |          |          |         |
|-----------------------------|---------------|----------|---------|----------|----------|---------|
| gi 115551308 dbj AK235986.1 | salmon        | 193.2072 | 31.9975 | 0.871123 | 0.054453 | 15.138  |
| gi 115551350 dbj AK236028.1 | blue          | 662.8035 | 154.667 | 0.881087 | 0.048337 | 10.688  |
| gi 115551358 dbj AK236036.1 | grey          | 287.5464 | 12.7862 | 0.965976 | 0.007495 | 12.868  |
| gi 115551374 dbj AK236052.1 | turquoise     | 485.0761 | 128.07  | 0.752134 | 0.1425   | 24.182  |
| gi 115551375 dbj AK236053.1 | turquoise     | 425.9409 | 137.533 | 0.801169 | 0.103196 | 6.346   |
| gi 115551387 dbj AK236065.1 | red           | 550.6787 | 87.8012 | 0.948398 | 0.013962 | 29.51   |
| gi 115551391 dbj AK236069.1 | tan           | 887.6143 | 66.6943 | 0.991716 | 0.000904 | 16.896  |
| gi 115551397 dbj AK236075.1 | blue          | 972.6207 | 232.192 | 0.971427 | 0.005773 | 68.722  |
| gi 115551408 dbj AK236086.1 | darkorange    | 208.7962 | 19.5731 | 0.986333 | 0.001914 | 151.916 |
| gi 115551416 dbj AK236094.1 | turquoise     | 736.9507 | 240.262 | 0.922726 | 0.025485 | 30.264  |
| gi 115551438 dbj AK236116.1 | blue          | 796.5224 | 236.875 | 0.974717 | 0.004807 | 29.028  |
| gi 115551444 dbj AK236122.1 | navy          | 355.0456 | 26.5507 | 0.796479 | 0.106789 | 6.238   |
| gi 115551449 dbj AK236127.1 | blue          | 794.7314 | 197.086 | 0.929984 | 0.022005 | 135.572 |
| gi 115551452 dbj AK236130.1 | white         | 916.477  | 29.5902 | 0.833188 | 0.079707 | 13.808  |
| gi 115551471 dbj AK236149.1 | blue          | 822.0582 | 236.288 | 0.973519 | 0.005152 | 21.19   |
| gi 115551473 dbj AK236151.1 | darkorange    | 156.8336 | 9.23945 | 0.502598 | 0.38814  | 7.526   |
| gi 115551475 dbj AK236153.1 | sienna3       | 972.7382 | 25.8454 | 0.997887 | 0.000117 | 138.358 |
| gi 115551476 dbj AK236154.1 | white         | 911.1978 | 29.2219 | 0.813754 | 0.093744 | 20.49   |
| gi 115551480 dbj AK236158.1 | white         | 201.0878 | 21.1434 | 0.833852 | 0.079241 | 5.588   |
| gi 115551481 dbj AK236159.1 | black         | 980.7694 | 96.0311 | 0.992104 | 0.000841 | 16.602  |
| gi 115551482 dbj AK236160.1 | paleturquoise | 171.21   | 20.9865 | 0.98299  | 0.002656 | 29.776  |
| gi 115551497 dbj AK238961.1 | orange        | 329.9817 | 32.4664 | 0.977855 | 0.003943 | 100.144 |
| gi 115551518 dbj AK238982.1 | pink          | 211.8217 | 65.1324 | 0.974081 | 0.00499  | 43.332  |
| gi 115551521 dbj AK238985.1 | yellow        | 305.4764 | 112.325 | 0.98216  | 0.002853 | 161.28  |
| gi 115551534 dbj AK238998.1 | purple        | 117.991  | 20.8816 | 0.817759 | 0.090795 | 72.794  |
| gi 115551587 dbj AK239051.1 | midnightblue  | 115.4485 | 39.4177 | 0.956426 | 0.010847 | 22.622  |
| gi 115551605 dbj AK239069.1 | turquoise     | 375.5809 | 99.5425 | 0.666818 | 0.218958 | 13.942  |
| gi 115551606 dbj AK239070.1 | orange        | 463.0931 | 35.1127 | 0.996433 | 0.000256 | 11.86   |
| gi 115551623 dbj AK239087.1 | yellow        | 234.0266 | 79.4041 | 0.908494 | 0.032768 | 5.708   |
| gi 115551627 dbj AK239091.1 | turquoise     | 309.8219 | 83.6485 | 0.607872 | 0.276768 | 0.628   |
| gi 115551631 dbj AK239095.1 | navy          | 165.925  | 10.7372 | -0.68887 | 0.198313 | 4.168   |
| gi 115551640 dbj AK239104.1 | tan           | 868.7177 | 60.4809 | 0.972055 | 0.005584 | 36.388  |
| gi 115551642 dbj AK239106.1 | red           | 449.2596 | 102.112 | 0.982038 | 0.002882 | 60.56   |
| gi 115551652 dbj AK239116.1 | turquoise     | 369.971  | 99.4844 | 0.662606 | 0.222965 | 178.732 |
| gi 115551691 dbj AK230600.1 | darkturquoise | 210.3272 | 24.7877 | 0.913578 | 0.030099 | 18.848  |
| gi 115551695 dbj AK232156.1 | blue          | 834.4064 | 239.414 | 0.975038 | 0.004717 | 27.348  |
| gi 115551776 dbj AK236182.1 | brown         | 188.1621 | 29.7717 | 0.677614 | 0.208781 | 204.35  |
| gi 115551783 dbj AK236189.1 | lightyellow   | 865.0456 | 60.4947 | 0.990087 | 0.001183 | 13.904  |
| gi 115551790 dbj AK236196.1 | darkmagenta   | 967.2083 | 24.9794 | 0.978588 | 0.003749 | 23.924  |
| gi 115551828 dbj AK236235.1 | tan           | 946.0678 | 61.1264 | 0.971961 | 0.005612 | 9.444   |
| gi 115551842 dbj AK236249.1 | black         | 925.5482 | 95.2864 | 0.991101 | 0.001006 | 14.344  |
| gi 115551862 dbj AK236269.1 | lightcyan     | 267.8451 | 40.305  | 0.971181 | 0.005847 | 3.204   |
| gi 115551864 dbj AK236271.1 | grey60        | 835.9394 | 58.3089 | 0.98157  | 0.002995 | 5.462   |
| gi 115551880 dbj AK236287.1 | blue          | 953.7936 | 225.068 | 0.963659 | 0.008271 | 12.832  |
| gi 115551881 dbj AK236288.1 | yellow        | 231.8423 | 76.401  | 0.901269 | 0.036684 | 3.248   |
| gi 115551894 dbj AK236301.1 | turquoise     | 757.4298 | 244.629 | 0.930804 | 0.021622 | 11.856  |
| gi 115551903 dbj AK236310.1 | turquoise     | 722.0981 | 223.248 | 0.943108 | 0.01615  | 30.138  |
| gi 115551909 dbj AK236316.1 | darkred       | 265.896  | 39.3953 | 0.968398 | 0.006712 | 1.26    |

|                             |               |          |         |          |          |          |
|-----------------------------|---------------|----------|---------|----------|----------|----------|
| gi 115551914 dbj AK236321.1 | turquoise     | 278.7328 | 68.0264 | 0.526198 | 0.362373 | 14.896   |
| gi 115551917 dbj AK236324.1 | turquoise     | 669.155  | 215.295 | 0.905314 | 0.034474 | 134.988  |
| gi 115551923 dbj AK236330.1 | magenta       | 244.2477 | 76.2672 | 0.982128 | 0.00286  | 3.43     |
| gi 115551932 dbj AK236339.1 | tan           | 954.0436 | 68.7753 | 0.998495 | 7.00E-05 | 96.72    |
| gi 115551933 dbj AK236340.1 | darkorange    | 186.8235 | 9.07866 | 0.566118 | 0.319801 | 31.002   |
| gi 115551938 dbj AK236345.1 | turquoise     | 469.5843 | 109.47  | 0.712632 | 0.176735 | 33.034   |
| gi 115551942 dbj AK236349.1 | yellow        | 302.7034 | 116.151 | 0.991252 | 0.000981 | 3.526    |
| gi 115551948 dbj AK236355.1 | darkgrey      | 214.8812 | 30.8363 | 0.970408 | 0.006084 | 11.422   |
| gi 115551969 dbj AK239162.1 | blue          | 799.6334 | 239.065 | 0.975517 | 0.004582 | 6.372    |
| gi 115551993 dbj AK239186.1 | navy          | 87.36436 | 6.05931 | 0.069273 | 0.91187  | 21.418   |
| gi 115551997 dbj AK239190.1 | blue          | 793.351  | 177.117 | 0.912603 | 0.030605 | 3.266    |
| gi 115552025 dbj AK239218.1 | lightgreen    | 300.6733 | 60.0005 | 0.995    | 0.000424 | 7.096    |
| gi 115552029 dbj AK239222.1 | turquoise     | 783.2297 | 251.356 | 0.945372 | 0.015201 | 25.136   |
| gi 115552039 dbj AK239232.1 | turquoise     | 317.1675 | 75.3947 | 0.578632 | 0.306736 | 8.03     |
| gi 115552041 dbj AK239234.1 | pink          | 315.6388 | 47.9872 | 0.849695 | 0.068352 | 7.672    |
| gi 115552061 dbj AK239254.1 | grey60        | 940.2921 | 62.8131 | 0.996661 | 0.000232 | 7.26     |
| gi 115552064 dbj AK239257.1 | turquoise     | 600.0853 | 149.057 | 0.832505 | 0.080188 | 30.608   |
| gi 115552079 dbj AK239272.1 | magenta       | 209.1768 | 67.569  | 0.955731 | 0.011107 | 5.856    |
| gi 115552089 dbj AK239282.1 | blue          | 787.8074 | 225.366 | 0.959206 | 0.00983  | 49.65    |
| gi 115552097 dbj AK239290.1 | blue          | 822.9204 | 191.795 | 0.924534 | 0.024603 | 36.76    |
| gi 115552101 dbj AK239294.1 | blue          | 712.0932 | 168.428 | 0.895372 | 0.039983 | 23.936   |
| gi 115552119 dbj AK239312.1 | royalblue     | 256.8168 | 14.6426 | 0.729947 | 0.161466 | 6.958    |
| gi 115552139 dbj AK239332.1 | turquoise     | 619.9254 | 191.203 | 0.885837 | 0.045503 | 12.496   |
| gi 115552153 dbj AK239346.1 | black         | 972.5342 | 98.8896 | 0.99867  | 5.82E-05 | 10.284   |
| gi 115552177 dbj AK230486.1 | midnightblue  | 80.13405 | 5.46155 | -0.1822  | 0.769305 | 1883.564 |
| gi 115552179 dbj AK230488.1 | turquoise     | 311.3958 | 100.748 | 0.647111 | 0.237875 | 13.1     |
| gi 115552191 dbj AK230500.1 | orange        | 594.0747 | 31.175  | 0.968266 | 0.006754 | 24.222   |
| gi 115552195 dbj AK230504.1 | turquoise     | 614.2287 | 177.77  | 0.870967 | 0.05455  | 33.424   |
| gi 115552216 dbj AK230525.1 | paleturquoise | 160.0631 | 20.0838 | 0.971807 | 0.005659 | 10.184   |
| gi 115552220 dbj AK230529.1 | purple        | 130.2814 | 8.98439 | -0.84073 | 0.074455 | 16.2     |
| gi 115552234 dbj AK230543.1 | darkred       | 200.4863 | 34.3549 | 0.925642 | 0.024067 | 1.972    |
| gi 115552246 dbj AK230555.1 | blue          | 601.8463 | 138.526 | 0.850182 | 0.068025 | 6.198    |
| gi 115552250 dbj AK230559.1 | red           | 346.8277 | 77.0967 | 0.919953 | 0.026858 | 56.238   |
| gi 115552260 dbj AK230569.1 | navy          | 198.4393 | 10.6189 | -0.62701 | 0.2576   | 43.896   |
| gi 115552269 dbj AK230578.1 | blue          | 495.1088 | 103.229 | 0.793374 | 0.109187 | 20.638   |
| gi 115552272 dbj AK230581.1 | lightcyan     | 143.1928 | 18.8872 | 0.794931 | 0.107982 | 23.684   |
| gi 115552281 dbj AK230590.1 | navy          | 144.4289 | 40.3466 | 0.94713  | 0.014477 | 22.134   |
| gi 115552282 dbj AK230591.1 | blue          | 887.2355 | 244.386 | 0.980904 | 0.003159 | 93.892   |
| gi 115552295 dbj AK230605.1 | grey60        | 946.7071 | 60.674  | 0.989546 | 0.001281 | 17.05    |
| gi 115552309 dbj AK230619.1 | turquoise     | 435.1014 | 144.748 | 0.757608 | 0.137928 | 164.238  |
| gi 115552311 dbj AK230621.1 | turquoise     | 195.2144 | 53.9389 | 0.544467 | 0.342726 | 28.264   |
| gi 115552314 dbj AK230624.1 | blue          | 776.4265 | 225.746 | 0.960792 | 0.009265 | 50.232   |
| gi 115552353 dbj AK232758.1 | blue          | 643.2168 | 190.74  | 0.924738 | 0.024504 | 9.188    |
| gi 115552359 dbj AK232764.1 | turquoise     | 866.5594 | 266.042 | 0.969557 | 0.006347 | 29.106   |
| gi 115552369 dbj AK236374.1 | blue          | 729.5315 | 222.355 | 0.957153 | 0.010578 | 9.59     |
| gi 115552393 dbj AK236398.1 | magenta       | 266.6278 | 79.5914 | 0.991853 | 0.000882 | 7.458    |
| gi 115552399 dbj AK236404.1 | sienna3       | 965.8294 | 25.9492 | 0.998704 | 5.60E-05 | 26.816   |
| gi 115552409 dbj AK236414.1 | turquoise     | 390.3032 | 117.627 | 0.733465 | 0.158413 | 0.77     |

|                             |               |          |         |          |          |          |
|-----------------------------|---------------|----------|---------|----------|----------|----------|
| gi 115552411 dbj AK236416.1 | brown         | 94.65906 | 26.5331 | 0.741089 | 0.151855 | 4.896    |
| gi 115552413 dbj AK236418.1 | turquoise     | 741.0695 | 238.503 | 0.92091  | 0.026381 | 15.924   |
| gi 115552415 dbj AK236420.1 | brown         | 83.00468 | 21.9034 | 0.571935 | 0.313711 | 13.738   |
| gi 115552428 dbj AK236433.1 | midnightblue  | 140.5144 | 41.7442 | 0.967328 | 0.007054 | 1841.316 |
| gi 115552430 dbj AK236435.1 | turquoise     | 836.1104 | 251.265 | 0.951495 | 0.01273  | 33.88    |
| gi 115552454 dbj AK236459.1 | violet        | 857.6446 | 71.217  | 0.98809  | 0.001558 | 18.736   |
| gi 115552473 dbj AK236478.1 | violet        | 993.6555 | 72.8925 | 0.992809 | 0.000731 | 76.252   |
| gi 115552477 dbj AK236482.1 | turquoise     | 371.3805 | 122.276 | 0.740515 | 0.152346 | 3.292    |
| gi 115552482 dbj AK236487.1 | lightgreen    | 270.4299 | 56.2493 | 0.981785 | 0.002943 | 8.334    |
| gi 115552488 dbj AK236493.1 | blue          | 884.3519 | 253.916 | 0.992265 | 0.000816 | 14.694   |
| gi 115552491 dbj AK236496.1 | greenyellow   | 247.2889 | 42.3185 | 0.925435 | 0.024167 | 12.1     |
| gi 115552492 dbj AK236497.1 | black         | 980.9845 | 99.0855 | 0.999155 | 2.95E-05 | 15.732   |
| gi 115552519 dbj AK236524.1 | turquoise     | 689.1916 | 211.878 | 0.919051 | 0.027309 | 14.856   |
| gi 115552523 dbj AK236528.1 | darkmagenta   | 962.4803 | 26.9158 | 0.993293 | 0.000659 | 100.946  |
| gi 115552527 dbj AK236532.1 | grey60        | 924.6031 | 62.2913 | 0.994953 | 0.00043  | 70.518   |
| gi 115552544 dbj AK236549.1 | blue          | 667.7365 | 168.515 | 0.894995 | 0.040197 | 15.052   |
| gi 115552549 dbj AK236554.1 | turquoise     | 383.1438 | 96.8891 | 0.680749 | 0.205852 | 46.856   |
| gi 115552559 dbj AK236564.1 | tan           | 816.9161 | 62.7948 | 0.978958 | 0.003652 | 14.748   |
| gi 115552575 dbj AK232780.1 | turquoise     | 389.8388 | 84.4714 | 0.653721 | 0.231482 | 53.548   |
| gi 115552583 dbj AK232788.1 | white         | 992.8698 | 27.2011 | 0.727228 | 0.163837 | 30.672   |
| gi 115552602 dbj AK232807.1 | darkgreen     | 276.9922 | 36.4001 | 0.981705 | 0.002962 | 71.42    |
| gi 115552627 dbj AK232832.1 | darkgrey      | 191.4631 | 34.7681 | 0.99623  | 0.000278 | 9.2      |
| gi 115552638 dbj AK232843.1 | midnightblue  | 181.3766 | 42.5868 | 0.973838 | 0.00506  | 190.518  |
| gi 115552645 dbj AK232850.1 | purple        | 81.92244 | 14.265  | 0.749355 | 0.144837 | 45.07    |
| gi 115552656 dbj AK232861.1 | brown         | 299.9064 | 16.7575 | 0.425708 | 0.47482  | 12.676   |
| gi 115552676 dbj AK232881.1 | navy          | 110.7939 | 34.8486 | 0.866279 | 0.057508 | 22.97    |
| gi 115552724 dbj AK232929.1 | pink          | 125.5473 | 12.1919 | 0.224248 | 0.71689  | 32.016   |
| gi 115552731 dbj AK232936.1 | midnightblue  | 180.1905 | 43.0221 | 0.971201 | 0.005841 | 10.272   |
| gi 115552766 dbj AK239359.1 | blue          | 768.0927 | 223.369 | 0.956236 | 0.010918 | 19.1     |
| gi 115552791 dbj AK239385.1 | darkorange    | 139.011  | 8.68417 | 0.428964 | 0.471072 | 20.292   |
| gi 115552842 dbj AK239436.1 | brown         | 88.13491 | 38.7328 | 0.659504 | 0.225928 | 455.404  |
| gi 115552862 dbj AK239456.1 | yellow        | 268.722  | 88.5328 | 0.925847 | 0.023968 | 127.192  |
| gi 115552865 dbj AK239459.1 | brown         | 165.9537 | 54.1034 | 0.940431 | 0.017296 | 139.112  |
| gi 115552884 dbj AK239478.1 | turquoise     | 610.9085 | 174.559 | 0.864061 | 0.058924 | 62.134   |
| gi 115552903 dbj AK239497.1 | turquoise     | 939.0428 | 268.192 | 0.985717 | 0.002045 | 80.656   |
| gi 115552915 dbj AK239509.1 | red           | 325.5714 | 78.5902 | 0.925755 | 0.024013 | 23.264   |
| gi 115552930 dbj AK239524.1 | sienna3       | 962.4952 | 25.9292 | 0.998554 | 6.60E-05 | 55.616   |
| gi 115552932 dbj AK239526.1 | turquoise     | 786.6019 | 221.866 | 0.931581 | 0.021261 | 12.438   |
| gi 115552944 dbj AK239538.1 | pink          | 236.5404 | 59.7867 | 0.928594 | 0.022659 | 46.722   |
| gi 115552956 dbj AK239550.1 | purple        | 75.84729 | 13.3231 | 0.97172  | 0.005685 | 9.844    |
| gi 115552967 dbj AK239553.1 | paleturquoise | 206.832  | 19.5163 | 0.951963 | 0.012547 | 10.566   |
| gi 115552977 dbj AK239563.1 | grey60        | 974.8206 | 63.1409 | 0.997718 | 0.000131 | 81.628   |
| gi 115552989 dbj AK239575.1 | turquoise     | 568.5952 | 159.052 | 0.828777 | 0.082831 | 52.36    |
| gi 115553011 dbj AK239597.1 | navy          | 117.7068 | 30.7501 | 0.847998 | 0.069495 | 8.752    |
| gi 115553014 dbj AK239600.1 | pink          | 240.1264 | 52.7269 | 0.905357 | 0.034451 | 53.692   |
| gi 115553015 dbj AK239601.1 | black         | 956.0028 | 97.4055 | 0.995245 | 0.000393 | 21.456   |
| gi 115553025 dbj AK239611.1 | white         | 170.3212 | 7.45695 | 0.26601  | 0.665344 | 81.498   |
| gi 115553031 dbj AK239617.1 | navy          | 153.0598 | 43.4112 | 0.985744 | 0.002039 | 19.548   |

|                             |               |          |         |          |          |         |
|-----------------------------|---------------|----------|---------|----------|----------|---------|
| gi 115553034 dbj AK239620.1 | lightyellow   | 1000.717 | 60.7952 | 0.990966 | 0.001029 | 22.308  |
| gi 115553038 dbj AK239624.1 | grey          | 243.2707 | 11.8099 | 0.968949 | 0.006538 | 237.304 |
| gi 115553041 dbj AK239627.1 | blue          | 623.6915 | 179.637 | 0.913916 | 0.029925 | 9.798   |
| gi 115553045 dbj AK239631.1 | turquoise     | 462.7157 | 129.008 | 0.750355 | 0.143995 | 13.95   |
| gi 115553060 dbj AK239646.1 | red           | 482.8555 | 109.288 | 0.996928 | 0.000204 | 236.196 |
| gi 115553074 dbj AK239660.1 | blue          | 696.6624 | 211.144 | 0.947807 | 0.014201 | 47.204  |
| gi 115553082 dbj AK239668.1 | turquoise     | 965.1347 | 267.313 | 0.99196  | 0.000864 | 59.426  |
| gi 115553090 dbj AK239676.1 | white         | 976.0718 | 28.8078 | 0.756353 | 0.138972 | 22.278  |
| gi 115553091 dbj AK239677.1 | sienna3       | 989.7187 | 25.9517 | 0.998669 | 5.83E-05 | 28.858  |
| gi 115553103 dbj AK239689.1 | grey60        | 976.5827 | 59.9775 | 0.987239 | 0.001727 | 72.864  |
| gi 115553107 dbj AK239693.1 | pink          | 226.5859 | 68.844  | 0.985774 | 0.002032 | 25.484  |
| gi 115553121 dbj AK239707.1 | turquoise     | 484.1329 | 163.862 | 0.827229 | 0.083937 | 28.55   |
| gi 115553124 dbj AK239710.1 | black         | 730.4744 | 75.7641 | 0.944801 | 0.015439 | 5.234   |
| gi 115553140 dbj AK239726.1 | brown         | 85.45106 | 29.5788 | 0.562152 | 0.32397  | 24.936  |
| gi 115553142 dbj AK239728.1 | red           | 624.3603 | 95.2383 | 0.965279 | 0.007726 | 43.712  |
| gi 115553143 dbj AK239729.1 | orange        | 476.6342 | 30.6837 | 0.964257 | 0.008068 | 10.526  |
| gi 115553145 dbj AK239731.1 | darkred       | 239.8782 | 45.34   | 0.994582 | 0.000478 | 6.044   |
| gi 115553157 dbj AK239743.1 | darkgreen     | 284.7095 | 30.7145 | 0.94549  | 0.015152 | 5.046   |
| gi 115553159 dbj AK239745.1 | navy          | 127.9999 | 37.4173 | 0.912341 | 0.030742 | 25.354  |
| gi 115553169 dbj AK232967.1 | yellow        | 144.1465 | 40.7907 | 0.745608 | 0.148007 | 57.514  |
| gi 115553171 dbj AK232969.1 | orange        | 385.8249 | 35.4342 | 0.997503 | 0.00015  | 40.374  |
| gi 115553181 dbj AK232979.1 | tan           | 870.0004 | 63.2854 | 0.980977 | 0.00314  | 18.478  |
| gi 115553189 dbj AK232987.1 | paleturquoise | 217.2958 | 17.2851 | 0.92409  | 0.024818 | 23.706  |
| gi 115553196 dbj AK232994.1 | pink          | 66.61514 | 7.3255  | 0.395229 | 0.510205 | 48.77   |
| gi 115553202 dbj AK233000.1 | blue          | 661.5182 | 203.703 | 0.936975 | 0.018813 | 52.326  |
| gi 115553207 dbj AK233005.1 | tan           | 897.4055 | 66.8972 | 0.992596 | 0.000764 | 11.506  |
| gi 115553209 dbj AK233007.1 | yellow        | 304.2173 | 111.602 | 0.980377 | 0.00329  | 129.784 |
| gi 115553226 dbj AK233024.1 | blue          | 798.8542 | 164.954 | 0.893166 | 0.041239 | 23.822  |
| gi 115553231 dbj AK233029.1 | blue          | 854.0271 | 242.32  | 0.978301 | 0.003824 | 69.024  |
| gi 115553249 dbj AK233047.1 | turquoise     | 497.1302 | 161.333 | 0.828622 | 0.082942 | 299.342 |
| gi 115553264 dbj AK233062.1 | paleturquoise | 200.8147 | 18.1882 | 0.930544 | 0.021743 | 1.67    |
| gi 115553284 dbj AK233082.1 | skyblue       | 138.4744 | 25.6878 | 0.946564 | 0.014709 | 30.648  |
| gi 115553328 dbj AK233126.1 | grey          | 133.1267 | 8.84961 | 0.250985 | 0.683823 | 45.114  |
| gi 115553344 dbj AK233142.1 | turquoise     | 758.7661 | 225.813 | 0.939657 | 0.017632 | 8.86    |
| gi 115553351 dbj AK233149.1 | skyblue       | 196.2457 | 30.2441 | 0.980971 | 0.003142 | 29.952  |
| gi 115553356 dbj AK233154.1 | darkturquoise | 157.6545 | 31.6828 | 0.972866 | 0.005344 | 3.458   |
| gi 115553369 dbj AK236572.1 | turquoise     | 610.8158 | 171.222 | 0.868159 | 0.056316 | 31.13   |
| gi 115553370 dbj AK236573.1 | darkgreen     | 264.7068 | 20.9752 | 0.832182 | 0.080416 | 14.57   |
| gi 115553373 dbj AK236576.1 | turquoise     | 883.3786 | 259.05  | 0.976158 | 0.004404 | 58.488  |
| gi 115553381 dbj AK236584.1 | turquoise     | 462.9796 | 157.211 | 0.797367 | 0.106105 | 23.052  |
| gi 115553384 dbj AK236587.1 | green         | 101.9058 | 30.7359 | 0.759033 | 0.136746 | 150.688 |
| gi 115553397 dbj AK236600.1 | turquoise     | 203.5287 | 69.161  | 0.573054 | 0.312543 | 9.438   |
| gi 115553406 dbj AK236609.1 | turquoise     | 717.8482 | 221.328 | 0.906231 | 0.03398  | 7.73    |
| gi 115553415 dbj AK236618.1 | blue          | 813.6949 | 200.048 | 0.931179 | 0.021448 | 20.968  |
| gi 115553434 dbj AK236637.1 | blue          | 899.088  | 209.026 | 0.948166 | 0.014056 | 12.974  |
| gi 115553440 dbj AK236643.1 | blue          | 825.8582 | 231.096 | 0.967632 | 0.006957 | 17.516  |
| gi 115553452 dbj AK236655.1 | turquoise     | 542.9118 | 152.802 | 0.819179 | 0.089756 | 44.64   |
| gi 115553453 dbj AK236656.1 | paleturquoise | 162.3307 | 17.4861 | 0.929248 | 0.02235  | 33.414  |

|                             |             |          |         |          |          |         |
|-----------------------------|-------------|----------|---------|----------|----------|---------|
| gi 115553457 dbj AK236660.1 | tan         | 859.0391 | 65.4552 | 0.987944 | 0.001586 | 14.702  |
| gi 115553468 dbj AK236671.1 | brown       | 180.0898 | 43.0239 | 0.650479 | 0.234611 | 45.206  |
| gi 115553471 dbj AK236674.1 | blue        | 766.8865 | 227.283 | 0.964012 | 0.008151 | 48.232  |
| gi 115553478 dbj AK236681.1 | greenyellow | 119.2082 | 20.1537 | 0.746902 | 0.146909 | 28      |
| gi 115553483 dbj AK236686.1 | turquoise   | 436.9869 | 131.235 | 0.755996 | 0.13927  | 12.076  |
| gi 115553496 dbj AK236699.1 | lightgreen  | 291.1819 | 58.9128 | 0.991348 | 0.000965 | 3.794   |
| gi 115553497 dbj AK236700.1 | green       | 104.7653 | 14.5397 | -0.04044 | 0.948524 | 66.124  |
| gi 115553505 dbj AK236708.1 | brown       | 86.96721 | 21.7105 | 0.416042 | 0.485985 | 7.498   |
| gi 115553521 dbj AK236724.1 | sienna3     | 983.0559 | 25.8549 | 0.99793  | 0.000113 | 14.646  |
| gi 115553524 dbj AK236727.1 | brown       | 82.6825  | 31.2406 | 0.533836 | 0.354127 | 51.99   |
| gi 115553527 dbj AK236730.1 | lightcyan   | 296.8174 | 42.4607 | 0.986519 | 0.001875 | 64.674  |
| gi 115553540 dbj AK236743.1 | darkred     | 198.5683 | 39.5945 | 0.957401 | 0.010487 | 9.672   |
| gi 115553549 dbj AK236752.1 | turquoise   | 731.3034 | 238.119 | 0.920402 | 0.026634 | 158.358 |
| gi 115553555 dbj AK236758.1 | lightgreen  | 302.9534 | 60.8267 | 0.997793 | 0.000124 | 7.636   |
| gi 115553566 dbj AK239753.1 | brown       | 191.0119 | 58.46   | 0.947007 | 0.014527 | 15.71   |
| gi 115553571 dbj AK239758.1 | blue        | 649.1723 | 189.864 | 0.924817 | 0.024465 | 31.552  |
| gi 115553590 dbj AK239777.1 | salmon      | 354.3692 | 39.8987 | 0.928254 | 0.022819 | 27.298  |
| gi 115553648 dbj AK239835.1 | blue        | 840.5099 | 221.469 | 0.960086 | 0.009515 | 7.724   |
| gi 115553654 dbj AK239841.1 | brown       | 95.68649 | 26.5583 | 0.678133 | 0.208296 | 1.534   |
| gi 115553671 dbj AK239858.1 | turquoise   | 621.1569 | 199.088 | 0.910719 | 0.031591 | 65.798  |
| gi 115553680 dbj AK239867.1 | violet      | 961.1018 | 72.9736 | 0.993145 | 0.000681 | 4.688   |
| gi 115553700 dbj AK239887.1 | turquoise   | 309.8378 | 93.1026 | 0.650618 | 0.234477 | 26.368  |
| gi 115553703 dbj AK239890.1 | turquoise   | 636.2472 | 152.901 | 0.837527 | 0.076671 | 39.566  |
| gi 115553719 dbj AK239906.1 | blue        | 838.5704 | 239.13  | 0.97573  | 0.004522 | 269.14  |
| gi 115553747 dbj AK239934.1 | grey        | 80.7206  | 6.7914  | 0.17232  | 0.781686 | 27.794  |
| gi 115553748 dbj AK239935.1 | brown       | 227.396  | 61.6337 | 0.92211  | 0.025788 | 26.496  |
| gi 115553757 dbj AK239944.1 | green       | 164.8039 | 19.4672 | 0.152344 | 0.806782 | 40.182  |
| gi 115553782 dbj AK236787.1 | grey        | 176.6163 | 12.3907 | 0.213662 | 0.730042 | 18.114  |
| gi 115553811 dbj AK236816.1 | blue        | 727.2225 | 215.399 | 0.952803 | 0.012221 | 5.446   |
| gi 115553814 dbj AK236819.1 | lightcyan   | 290.0467 | 41.1593 | 0.979569 | 0.003495 | 35.044  |
| gi 115553831 dbj AK236836.1 | darkorange  | 197.8691 | 9.03793 | 0.57202  | 0.313622 | 12.05   |
| gi 115553846 dbj AK236851.1 | turquoise   | 479.7347 | 102.288 | 0.734845 | 0.15722  | 12.128  |
| gi 115553858 dbj AK236863.1 | brown       | 90.31413 | 32.4001 | 0.752657 | 0.142061 | 21.986  |
| gi 115553862 dbj AK236867.1 | greenyellow | 234.6028 | 47.8797 | 0.960413 | 0.009399 | 10.896  |
| gi 115553894 dbj AK236899.1 | turquoise   | 587.5343 | 150.151 | 0.820215 | 0.089    | 8.04    |
| gi 115553962 dbj AK233171.1 | brown       | 91.56896 | 22.2217 | 0.588908 | 0.296113 | 40.316  |
| gi 115553967 dbj AK233176.1 | green       | 163.3788 | 22.6654 | 0.298881 | 0.625197 | 50.312  |
| gi 115554007 dbj AK233216.1 | turquoise   | 314.9063 | 78.386  | 0.607194 | 0.277455 | 11.152  |
| gi 115554012 dbj AK233221.1 | tan         | 887.3551 | 67.3853 | 0.994395 | 0.000503 | 27.338  |
| gi 115554020 dbj AK233229.1 | turquoise   | 415.0701 | 113.797 | 0.724893 | 0.165881 | 2.296   |
| gi 115554022 dbj AK233231.1 | red         | 370.8781 | 85.7884 | 0.944304 | 0.015646 | 311.794 |
| gi 115554075 dbj AK233284.1 | navy        | 161.0863 | 11.6989 | -0.59994 | 0.284816 | 48.25   |
| gi 115554113 dbj AK233322.1 | violet      | 958.7592 | 74.068  | 0.996135 | 0.000288 | 6.874   |
| gi 115554124 dbj AK233334.1 | turquoise   | 764.8283 | 245.276 | 0.933896 | 0.020198 | 235.574 |
| gi 115554126 dbj AK233336.1 | darkred     | 189.3444 | 37.2871 | 0.945882 | 0.01499  | 2.804   |
| gi 115554130 dbj AK233340.1 | blue        | 699.5199 | 193.162 | 0.929269 | 0.02234  | 27.6    |
| gi 115554133 dbj AK233343.1 | darkmagenta | 805.7961 | 23.3139 | 0.96434  | 0.00804  | 53.59   |
| gi 115554161 dbj AK239956.1 | turquoise   | 489.6849 | 121.909 | 0.759155 | 0.136645 | 33.97   |



|                             |             |          |         |          |          |          |
|-----------------------------|-------------|----------|---------|----------|----------|----------|
| gi 115554180 dbj AK239975.1 | turquoise   | 425.0257 | 141.58  | 0.77361  | 0.124823 | 19.686   |
| gi 115554203 dbj AK239998.1 | violet      | 929.4696 | 74.6499 | 0.997668 | 0.000135 | 1.766    |
| gi 115554213 dbj AK240008.1 | blue        | 895.8826 | 256.51  | 0.993478 | 0.000632 | 24.162   |
| gi 115554214 dbj AK240009.1 | lightyellow | 866.327  | 60.545  | 0.990256 | 0.001153 | 8.184    |
| gi 115554223 dbj AK240018.1 | darkmagenta | 949.2346 | 26.9086 | 0.993421 | 0.00064  | 4.338    |
| gi 115554227 dbj AK240022.1 | grey60      | 964.7992 | 62.1699 | 0.994503 | 0.000489 | 32.852   |
| gi 115554228 dbj AK240023.1 | turquoise   | 453.7853 | 144.239 | 0.781869 | 0.118213 | 2.47     |
| gi 115554247 dbj AK240042.1 | navy        | 120.3932 | 5.395   | 0.080124 | 0.898093 | 1.924    |
| gi 115554271 dbj AK240066.1 | lightcyan   | 197.7069 | 30.3396 | 0.900068 | 0.037348 | 35.76    |
| gi 115554273 dbj AK240068.1 | turquoise   | 359.3335 | 119.325 | 0.7562   | 0.1391   | 6.974    |
| gi 115554282 dbj AK240077.1 | black       | 947.2256 | 87.205  | 0.972941 | 0.005321 | 104.51   |
| gi 115554284 dbj AK240079.1 | black       | 889.9196 | 87.2515 | 0.973433 | 0.005177 | 9.056    |
| gi 115554299 dbj AK240094.1 | orange      | 555.3852 | 33.8698 | 0.988008 | 0.001574 | 25.912   |
| gi 115554309 dbj AK240104.1 | purple      | 149.7324 | 10.9433 | -0.88843 | 0.043979 | 10.72    |
| gi 115554312 dbj AK240107.1 | red         | 641.8988 | 104.038 | 0.985272 | 0.002141 | 133.064  |
| gi 115554314 dbj AK240109.1 | lightyellow | 987.1236 | 62.9945 | 0.998239 | 8.87E-05 | 64.456   |
| gi 115554351 dbj AK240146.1 | grey        | 141.3466 | 12.4058 | -0.898   | 0.038502 | 16.006   |
| gi 115554358 dbj AK233368.1 | white       | 180.5065 | 25.4831 | 0.793961 | 0.108732 | 34.096   |
| gi 115554363 dbj AK233373.1 | blue        | 921.0186 | 200.653 | 0.940022 | 0.017473 | 11.254   |
| gi 115554371 dbj AK233381.1 | darkred     | 228.7375 | 41.1847 | 0.975453 | 0.0046   | 18.58    |
| gi 115554373 dbj AK233383.1 | turquoise   | 425.0313 | 142.207 | 0.778412 | 0.120966 | 5.18     |
| gi 115554409 dbj AK233419.1 | turquoise   | 785.8626 | 250.391 | 0.939841 | 0.017552 | 1350.794 |
| gi 115554410 dbj AK233420.1 | turquoise   | 967.6746 | 270.943 | 0.998702 | 5.62E-05 | 91.85    |
| gi 115554413 dbj AK233423.1 | pink        | 264.5653 | 75.5496 | 0.998359 | 7.98E-05 | 0.586    |
| gi 115554415 dbj AK233425.1 | white       | 184.7935 | 22.4411 | 0.901629 | 0.036486 | 12.866   |
| gi 115554455 dbj AK233465.1 | blue        | 802.5743 | 208.309 | 0.942551 | 0.016386 | 7.03     |
| gi 115554459 dbj AK233469.1 | orange      | 432.7407 | 16.9039 | 0.835546 | 0.078053 | 15.358   |
| gi 115554528 dbj AK233538.1 | brown       | 44.86015 | 9.04283 | 0.333763 | 0.583067 | 56.402   |
| gi 115554532 dbj AK233542.1 | yellowgreen | 164.6008 | 16.7425 | 0.974261 | 0.004938 | 332.47   |
| gi 115554540 dbj AK233550.1 | turquoise   | 486.637  | 132.908 | 0.758333 | 0.137326 | 26.134   |
| gi 115554557 dbj AK236967.1 | navy        | 159.6298 | 45.2143 | 0.997556 | 0.000145 | 3.16     |
| gi 115554560 dbj AK236970.1 | turquoise   | 907.9899 | 267.837 | 0.986982 | 0.00178  | 29.122   |
| gi 115554563 dbj AK236973.1 | lightcyan   | 194.0766 | 27.5523 | 0.865247 | 0.058165 | 21.378   |
| gi 115554566 dbj AK236976.1 | navy        | 81.70945 | 6.23799 | 0.347243 | 0.566929 | 58.744   |
| gi 115554588 dbj AK236998.1 | tan         | 697.2829 | 49.8637 | 0.933007 | 0.020605 | 4.57     |
| gi 115554610 dbj AK237020.1 | darkgreen   | 241.5463 | 18.4304 | 0.794181 | 0.108562 | 9.118    |
| gi 115554627 dbj AK237038.1 | greenyellow | 198.66   | 54.7941 | 0.994387 | 0.000504 | 16.33    |
| gi 115554633 dbj AK237044.1 | red         | 559.964  | 100.913 | 0.979278 | 0.00357  | 10.674   |
| gi 115554695 dbj AK237106.1 | red         | 424.6654 | 102.223 | 0.982534 | 0.002764 | 32.406   |
| gi 115554713 dbj AK237124.1 | green       | 105.6402 | 40.4307 | 0.850803 | 0.06761  | 40.422   |
| gi 115554725 dbj AK237136.1 | brown       | 153.3358 | 39.2959 | 0.774738 | 0.123913 | 8.248    |
| gi 115554740 dbj AK237151.1 | blue        | 740.1081 | 221.779 | 0.957132 | 0.010586 | 33.814   |
| gi 115554764 dbj AK233576.1 | brown       | 210.8215 | 62.4476 | 0.905916 | 0.034149 | 2.36     |
| gi 115554769 dbj AK233581.1 | turquoise   | 228.1852 | 51.7417 | 0.54032  | 0.347163 | 4.486    |
| gi 115554826 dbj AK233638.1 | brown       | 172.7535 | 31.8363 | 0.667068 | 0.218721 | 71.078   |
| gi 115554840 dbj AK233652.1 | turquoise   | 917.3302 | 261.232 | 0.976203 | 0.004391 | 20.872   |
| gi 115554857 dbj AK233669.1 | magenta     | 287.2688 | 55.8027 | 0.913268 | 0.03026  | 544.134  |
| gi 115554866 dbj AK233678.1 | blue        | 830.084  | 243.968 | 0.97961  | 0.003484 | 17.526   |

|                             |               |          |         |          |          |         |
|-----------------------------|---------------|----------|---------|----------|----------|---------|
| gi 115554868 dbj AK233680.1 | grey60        | 950.1232 | 59.8423 | 0.986839 | 0.001809 | 7.5     |
| gi 115554875 dbj AK233687.1 | brown         | 148.0566 | 44.7553 | 0.896403 | 0.039399 | 8.054   |
| gi 115554899 dbj AK233711.1 | turquoise     | 895.7897 | 265.724 | 0.97432  | 0.004921 | 32.948  |
| gi 115554918 dbj AK233730.1 | darkgreen     | 221.9525 | 30.0774 | 0.950549 | 0.013102 | 20.534  |
| gi 115554929 dbj AK233741.1 | yellow        | 276.3271 | 104.28  | 0.965436 | 0.007674 | 16.35   |
| gi 115554960 dbj AK240159.1 | orange        | 440.1106 | 35.171  | 0.99603  | 0.0003   | 20.988  |
| gi 115554973 dbj AK240172.1 | pink          | 282.8855 | 71.3289 | 0.971754 | 0.005674 | 46.194  |
| gi 115554982 dbj AK240181.1 | red           | 513.5982 | 104.742 | 0.987693 | 0.001636 | 183.398 |
| gi 115554984 dbj AK240183.1 | turquoise     | 670.0858 | 213.637 | 0.911854 | 0.030996 | 3.684   |
| gi 115555002 dbj AK240201.1 | black         | 962.1241 | 97.5893 | 0.995986 | 0.000305 | 18.326  |
| gi 115555012 dbj AK240211.1 | grey          | 343.1577 | 12.0481 | 0.958793 | 0.009979 | 21.534  |
| gi 115555020 dbj AK240219.1 | darkgrey      | 126.6    | 18.1241 | 0.827363 | 0.083841 | 14.996  |
| gi 115555021 dbj AK240220.1 | paleturquoise | 138.5165 | 10.2119 | 0.770126 | 0.127643 | 31.586  |
| gi 115555035 dbj AK240234.1 | turquoise     | 249.1189 | 74.4651 | 0.592759 | 0.292158 | 17.068  |
| gi 115555041 dbj AK240240.1 | turquoise     | 815.2331 | 255.411 | 0.955087 | 0.011349 | 35.902  |
| gi 115555043 dbj AK240242.1 | blue          | 630.895  | 190.904 | 0.923668 | 0.025024 | 4.822   |
| gi 115555058 dbj AK240257.1 | pink          | 255.1633 | 74.393  | 0.996024 | 0.000301 | 20.536  |
| gi 115555063 dbj AK240262.1 | lightcyan     | 313.626  | 40.3824 | 0.960264 | 0.009451 | 16.83   |
| gi 115555072 dbj AK240271.1 | turquoise     | 424.0945 | 140.965 | 0.802686 | 0.102042 | 10.174  |
| gi 115555076 dbj AK240275.1 | yellow        | 273.3508 | 101.117 | 0.961218 | 0.009115 | 5.598   |
| gi 115555097 dbj AK240296.1 | blue          | 706.0274 | 215.351 | 0.948745 | 0.013822 | 56.152  |
| gi 115555127 dbj AK240327.1 | turquoise     | 636.4489 | 158.099 | 0.839307 | 0.075435 | 28.298  |
| gi 115555129 dbj AK240329.1 | turquoise     | 621.4293 | 186.265 | 0.897353 | 0.038864 | 135.398 |
| gi 115555138 dbj AK240338.1 | turquoise     | 685.3878 | 217.23  | 0.899685 | 0.037561 | 1.78    |
| gi 115555145 dbj AK240345.1 | turquoise     | 708.0584 | 224.834 | 0.91156  | 0.03115  | 75.01   |
| gi 115555150 dbj AK233765.1 | turquoise     | 245.6534 | 58.6435 | 0.482565 | 0.410337 | 66.786  |
| gi 115555155 dbj AK233770.1 | tan           | 868.8902 | 62.7325 | 0.979469 | 0.00352  | 24.682  |
| gi 115555162 dbj AK233777.1 | magenta       | 219.7666 | 69.8692 | 0.962318 | 0.008731 | 81.068  |
| gi 115555163 dbj AK233778.1 | turquoise     | 935.4007 | 269.471 | 0.985959 | 0.001993 | 37.934  |
| gi 115555187 dbj AK233802.1 | blue          | 870.5563 | 225.561 | 0.960818 | 0.009255 | 9.866   |
| gi 115555188 dbj AK233803.1 | lightcyan     | 198.0175 | 30.362  | 0.895903 | 0.039682 | 21.934  |
| gi 115555205 dbj AK233820.1 | navy          | 228.96   | 26.5508 | 0.760564 | 0.135479 | 2.1     |
| gi 115555219 dbj AK233834.1 | turquoise     | 410.909  | 105.55  | 0.708312 | 0.180606 | 2.866   |
| gi 115555288 dbj AK233903.1 | turquoise     | 779.1761 | 218.744 | 0.920961 | 0.026356 | 42.264  |
| gi 115555322 dbj AK233937.1 | salmon        | 340.3768 | 36.6665 | 0.902966 | 0.035752 | 9.782   |
| gi 115555347 dbj AK233960.1 | pink          | 264.5653 | 75.5496 | 0.998359 | 7.98E-05 | 0.312   |
| gi 115555353 dbj AK233966.1 | turquoise     | 652.8266 | 166.198 | 0.85382  | 0.0656   | 28.312  |
| gi 115555420 dbj AK234033.1 | brown         | 212.4111 | 61.344  | 0.868554 | 0.056066 | 24.452  |
| gi 115555451 dbj AK234064.1 | blue          | 952.7233 | 212.636 | 0.950502 | 0.013121 | 17.152  |
| gi 115555475 dbj AK234088.1 | turquoise     | 460.9297 | 120.577 | 0.762101 | 0.134209 | 22.99   |
| gi 115555495 dbj AK234108.1 | blue          | 929.7319 | 224.409 | 0.961809 | 0.008908 | 12.858  |
| gi 115555513 dbj AK234126.1 | turquoise     | 942.0007 | 271.674 | 0.991194 | 0.000991 | 64.044  |
| gi 115555517 dbj AK234130.1 | lightyellow   | 874.6708 | 60.659  | 0.990653 | 0.001083 | 3.18    |
| gi 115555541 dbj AK237173.1 | tan           | 929.9465 | 68.8562 | 0.998667 | 5.84E-05 | 75.204  |
| gi 115555553 dbj AK237185.1 | darkturquoise | 135.9456 | 24.6572 | 0.903264 | 0.035589 | 52.724  |
| gi 115555561 dbj AK237193.1 | magenta       | 244.6775 | 77.673  | 0.986233 | 0.001935 | 3.798   |
| gi 115555588 dbj AK237220.1 | darkgrey      | 122.9593 | 14.8135 | 0.782651 | 0.117592 | 12.022  |
| gi 115555602 dbj AK237234.1 | turquoise     | 705.2963 | 189.564 | 0.902242 | 0.036148 | 15.752  |

|                                 |               |          |         |          |          |         |
|---------------------------------|---------------|----------|---------|----------|----------|---------|
| gi 115555616 dbj AK237249.1     | pink          | 264.5653 | 75.5496 | 0.998359 | 7.98E-05 | 0.118   |
| gi 115555619 dbj AK237252.1     | blue          | 568.8471 | 143.377 | 0.8649   | 0.058387 | 157.412 |
| gi 115555627 dbj AK237260.1     | darkorange    | 144.016  | 18.1669 | 0.946959 | 0.014547 | 0.732   |
| gi 115555639 dbj AK237272.1     | turquoise     | 655.7731 | 197.248 | 0.904197 | 0.03508  | 217.68  |
| gi 115555653 dbj AK237286.1     | white         | 157.5014 | 5.86117 | 0.092319 | 0.882623 | 41.312  |
| gi 115555661 dbj AK237294.1     | blue          | 889.7256 | 249.634 | 0.985498 | 0.002092 | 13.65   |
| gi 115555675 dbj AK237308.1     | orange        | 392.1325 | 33.206  | 0.983461 | 0.002547 | 18.28   |
| gi 115555681 dbj AK237314.1     | grey60        | 929.9044 | 62.9415 | 0.997131 | 0.000184 | 17.914  |
| gi 115555693 dbj AK237326.1     | tan           | 934.7313 | 68.7016 | 0.998013 | 0.000106 | 26.106  |
| gi 115555696 dbj AK237329.1     | midnightblue  | 131.6438 | 33.7469 | 0.912325 | 0.03075  | 10.09   |
| gi 115555721 dbj AK234149.1     | blue          | 657.5844 | 135.479 | 0.849317 | 0.068606 | 5.774   |
| gi 116175276 ref NM_001077227.1 | purple        | 183.134  | 19.7675 | -0.8227  | 0.087193 | 10.064  |
| gi 117661185 gb DQ629176.1      | navy          | 118.1405 | 30.1073 | 0.853707 | 0.065675 | 744.14  |
| gi 118403765 ref NM_001078687.1 | orange        | 346.9792 | 34.3658 | 0.989057 | 0.001372 | 173.502 |
| gi 118403821 ref NM_001078679.1 | grey60        | 924.2583 | 61.7059 | 0.993019 | 0.000699 | 10.154  |
| gi 118403857 ref NM_001078670.1 | lightcyan     | 214.1864 | 33.1263 | 0.921605 | 0.026037 | 11.624  |
| gi 118403869 ref NM_001078669.1 | blue          | 840.2835 | 238.389 | 0.978475 | 0.003779 | 36.222  |
| gi 118403911 ref NM_001078662.1 | green         | 131.4016 | 47.2006 | 0.90985  | 0.03205  | 52.434  |
| gi 119310177 ref NM_001032376.2 | lightyellow   | 970.3371 | 63.303  | 0.999238 | 2.53E-05 | 20.716  |
| gi 1245714 gb S80644.1          | pink          | 105.9402 | 14.0889 | 0.250424 | 0.684515 | 13.352  |
| gi 125490322 ref NM_213824.2    | blue          | 807.711  | 228.294 | 0.965423 | 0.007678 | 8.89    |
| gi 125630297 ref NM_001005152.2 | white         | 170.6361 | 23.2909 | 0.857614 | 0.063101 | 15.8    |
| gi 125630333 ref NM_214068.2    | turquoise     | 112.4889 | 33.3033 | 0.378822 | 0.529467 | 17.248  |
| gi 139530445 gb EF486522.1      | navy          | 406.2348 | 25.6708 | 0.779074 | 0.120437 | 138.754 |
| gi 145279656 ref NM_214014.2    | black         | 747.9881 | 77.7243 | 0.949935 | 0.013346 | 3.906   |
| gi 146198449 dbj AB292846.1     | red           | 425.3623 | 98.1751 | 0.973615 | 0.005124 | 12.65   |
| gi 146741279 dbj AB271920.1     | turquoise     | 337.5853 | 81.9456 | 0.631863 | 0.2528   | 4.028   |
| gi 147899058 ref NM_001097509.1 | grey          | 159.367  | 6.38873 | -0.82032 | 0.088921 | 270.96  |
| gi 147900046 ref NM_001097474.1 | pink          | 279.5    | 73.4262 | 0.979311 | 0.003561 | 563.452 |
| gi 147900501 ref NM_001097506.1 | white         | 959.2085 | 29.624  | 0.801014 | 0.103314 | 32.956  |
| gi 147906088 ref NM_213946.2    | blue          | 884.2411 | 218.646 | 0.953401 | 0.011991 | 201.254 |
| gi 148222423 ref NM_001097426.1 | red           | 587.2744 | 108.998 | 0.996158 | 0.000286 | 12.292  |
| gi 148222590 ref NM_001097486.1 | red           | 565.8476 | 108.747 | 0.995612 | 0.000349 | 67.136  |
| gi 148223598 ref NM_001097476.1 | violet        | 994.3591 | 73.1253 | 0.993492 | 0.00063  | 71.374  |
| gi 148224637 ref NM_001097469.1 | red           | 311.9712 | 75.8018 | 0.918038 | 0.027819 | 66.77   |
| gi 148225749 ref NM_001097504.1 | navy          | 285.2369 | 32.9491 | 0.858954 | 0.062225 | 27.322  |
| gi 148228021 ref NM_001097420.1 | darkturquoise | 201.1397 | 32.0166 | 0.974521 | 0.004863 | 11.108  |
| gi 148229131 ref NM_001097428.1 | pink          | 182.1795 | 49.8362 | 0.912489 | 0.030665 | 11.816  |
| gi 148233142 ref NM_001097435.1 | red           | 480.0165 | 93.4772 | 0.962145 | 0.008791 | 26.816  |
| gi 148233297 ref NM_001097485.1 | turquoise     | 627.0569 | 177.771 | 0.868294 | 0.05623  | 36.478  |
| gi 148233557 ref NM_001097460.1 | royalblue     | 160.0982 | 1.24643 | -0.46675 | 0.428057 | 31.524  |
| gi 148234109 ref NM_001093735.1 | blue          | 881.5269 | 252.635 | 0.989268 | 0.001332 | 26.872  |
| gi 148235350 ref NM_001097475.1 | royalblue     | 296.9054 | 12.3182 | 0.74268  | 0.150497 | 182.244 |
| gi 148237281 ref NM_001097478.1 | blue          | 956.082  | 212.631 | 0.951886 | 0.012577 | 265.254 |
| gi 149364039 gb EF468461.1      | violet        | 942.6164 | 74.7919 | 0.998074 | 0.000101 | 5.98    |
| gi 149944498 ref NM_214343.2    | black         | 980.2012 | 98.1902 | 0.996872 | 0.00021  | 34.384  |
| gi 149944608 ref NM_001001546.2 | sienna3       | 779.9874 | 22.7133 | 0.972174 | 0.005549 | 5.35    |
| gi 150246527 ref NM_001044575.2 | black         | 943.635  | 97.2476 | 0.994926 | 0.000434 | 102.608 |

|                                 |              |          |         |          |          |          |
|---------------------------------|--------------|----------|---------|----------|----------|----------|
| gi 153792026 ref NM_001099932.1 | midnightblue | 98.51824 | 31.7752 | 0.911797 | 0.031026 | 1510.836 |
| gi 153792275 ref NM_001097505.1 | blue         | 678.7958 | 172.54  | 0.899441 | 0.037697 | 4.35     |
| gi 153792324 ref NM_001097517.1 | turquoise    | 528.6212 | 162.555 | 0.840971 | 0.074286 | 15.094   |
| gi 153792599 ref NM_001099930.1 | white        | 217.2388 | 21.8936 | 0.722055 | 0.168376 | 10.642   |
| gi 154147629 ref NM_001100190.1 | turquoise    | 816.1832 | 250.927 | 0.948708 | 0.013837 | 53.18    |
| gi 154147643 ref NM_001100193.1 | turquoise    | 932.1115 | 263.53  | 0.984785 | 0.002248 | 27.852   |
| gi 156120135 ref NM_001101827.1 | white        | 970.3567 | 29.5668 | 0.796059 | 0.107112 | 43.466   |
| gi 156120149 ref NM_001101823.1 | white        | 194.6718 | 7.49975 | 0.156619 | 0.801405 | 3.094    |
| gi 156120151 ref NM_001101824.1 | lightyellow  | 973.3891 | 63.2518 | 0.99907  | 3.41E-05 | 16.432   |
| gi 156123600 gb EU030283.2      | purple       | 182.3646 | 14.4121 | -0.86421 | 0.058829 | 32.31    |
| gi 156151354 ref NM_001037146.2 | pink         | 268.9252 | 61.0688 | 0.935263 | 0.01958  | 21.106   |
| gi 157427686 ref NM_214374.2    | darkgreen    | 254.1464 | 37.5227 | 0.98378  | 0.002474 | 2336.788 |
| gi 157427714 ref NM_001105294.1 | magenta      | 259.3951 | 79.6035 | 0.991829 | 0.000886 | 7.264    |
| gi 157427721 ref NM_001105299.1 | blue         | 927.8648 | 199.286 | 0.936534 | 0.019009 | 68.426   |
| gi 157427723 ref NM_001105300.1 | turquoise    | 482.7318 | 161.157 | 0.816699 | 0.091572 | 78.168   |
| gi 157427727 ref NM_001105302.1 | turquoise    | 357.4655 | 102.26  | 0.675528 | 0.210738 | 10.65    |
| gi 157427731 ref NM_001105304.1 | salmon       | 175.669  | 40.9784 | 0.939888 | 0.017532 | 54.912   |
| gi 157427747 ref NM_001105296.1 | tan          | 923.6903 | 67.5491 | 0.994148 | 0.000537 | 13.62    |
| gi 158262680 ref NM_001109947.1 | darkgreen    | 232.8018 | 16.6926 | 0.74125  | 0.151717 | 13.96    |
| gi 158631261 ref NM_001099936.1 | turquoise    | 706.0286 | 229.606 | 0.924063 | 0.024831 | 42.248   |
| gi 160420270 ref NM_001044582.1 | violet       | 984.071  | 71.9628 | 0.990341 | 0.001138 | 50.222   |
| gi 162139822 ref NM_001111257.1 | violet       | 958.23   | 74.4621 | 0.997202 | 0.000178 | 39.34    |
| gi 162287024 ref NM_001111258.1 | navy         | 101.6564 | 23.7685 | 0.763784 | 0.132824 | 17.122   |
| gi 162951810 ref NM_001112690.1 | navy         | 164.4712 | 43.3349 | 0.989189 | 0.001347 | 3.258    |
| gi 16304807 emb AJ416019.1      | lightcyan    | 299.9584 | 43.6402 | 0.986811 | 0.001815 | 101.348  |
| gi 163115794 gb EU009401.2      | blue         | 798.5354 | 238.687 | 0.974565 | 0.004851 | 21.352   |
| gi 163310772 ref NM_001097521.2 | darkgrey     | 195.0994 | 32.7353 | 0.980691 | 0.003212 | 44.562   |
| gi 163915140 ref NM_001113047.1 | lightcyan    | 119.9205 | 13.8236 | 0.725941 | 0.164963 | 158.29   |
| gi 163915152 ref NM_001113053.1 | blue         | 656.5304 | 180.703 | 0.913161 | 0.030315 | 7.212    |
| gi 164518957 ref NM_001113287.1 | red          | 699.3187 | 94.7022 | 0.96406  | 0.008135 | 221.662  |
| gi 164664445 ref NM_001113439.1 | magenta      | 275.2898 | 78.413  | 0.989019 | 0.001379 | 48.158   |
| gi 164664451 ref NM_001113442.1 | turquoise    | 458.4117 | 116.93  | 0.715035 | 0.174592 | 25.786   |
| gi 164664455 ref NM_001113444.1 | turquoise    | 367.5934 | 107.056 | 0.723099 | 0.167458 | 61.34    |
| gi 165973425 ref NM_001113706.1 | pink         | 82.97506 | 18.4232 | 0.383287 | 0.524211 | 88.536   |
| gi 165973431 ref NM_001113698.1 | orange       | 241.9893 | 28.6602 | 0.947785 | 0.01421  | 52.258   |
| gi 166796042 ref NM_001114275.1 | blue         | 851.1399 | 247.937 | 0.984656 | 0.002276 | 5.01     |
| gi 166796054 ref NM_001114281.1 | turquoise    | 317.2491 | 95.2891 | 0.666835 | 0.218942 | 7.12     |
| gi 167908788 ref NM_001114675.1 | tan          | 745.7562 | 48.354  | 0.928064 | 0.022909 | 24.292   |
| gi 167908792 ref NM_001114670.1 | turquoise    | 738.0704 | 211.345 | 0.929929 | 0.02203  | 20.664   |
| gi 167908794 ref NM_001114671.1 | salmon       | 152.3851 | 32.6489 | 0.880205 | 0.048869 | 60.426   |
| gi 171905894 gb EU561660.1      | grey60       | 876.1986 | 61.074  | 0.990985 | 0.001026 | 476.374  |
| gi 172072681 ref NM_001122994.1 | greenyellow  | 103.4245 | 20.6785 | 0.749009 | 0.145129 | 88.476   |
| gi 172073180 ref NM_001099931.1 | black        | 967.2434 | 98.8961 | 0.998542 | 6.68E-05 | 20.48    |
| gi 178056465 ref NM_001123083.1 | salmon       | 156.4511 | 41.5099 | 0.94518  | 0.01528  | 11.976   |
| gi 178056481 ref NM_001123135.1 | black        | 930.9575 | 96.7979 | 0.994578 | 0.000479 | 3.848    |
| gi 178056483 ref NM_001123101.1 | violet       | 983.5313 | 72.2794 | 0.99111  | 0.001005 | 67.724   |
| gi 178056487 ref NM_001123204.1 | turquoise    | 573.2257 | 191.628 | 0.842348 | 0.073339 | 23.908   |
| gi 178056503 ref NM_001123076.1 | midnightblue | 138.9928 | 42.0729 | 0.96549  | 0.007656 | 622.692  |

|                                 |              |          |         |          |          |          |
|---------------------------------|--------------|----------|---------|----------|----------|----------|
| gi 178056523 ref NM_001123127.1 | violet       | 957.2575 | 75.0893 | 0.998884 | 4.47E-05 | 11.052   |
| gi 178056529 ref NM_001123203.1 | grey60       | 951.0809 | 61.9382 | 0.993764 | 0.000591 | 12.782   |
| gi 178056549 ref NM_001123162.1 | purple       | 48.36989 | 9.20899 | 0.438474 | 0.460161 | 0.772    |
| gi 178056555 ref NM_001123148.1 | turquoise    | 494.4596 | 157.409 | 0.817664 | 0.090864 | 18.842   |
| gi 178056566 ref NM_001123160.1 | tan          | 669.3997 | 46.6932 | 0.918141 | 0.027767 | 40.954   |
| gi 178056595 ref NM_001123136.1 | blue         | 949.8348 | 214.458 | 0.952832 | 0.01221  | 35.22    |
| gi 178056622 ref NM_001123213.1 | black        | 972.6048 | 97.644  | 0.996056 | 0.000297 | 58.106   |
| gi 178056662 ref NM_001123124.1 | darkred      | 201.1026 | 39.7999 | 0.958201 | 0.010194 | 7.8      |
| gi 178056668 ref NM_001123099.1 | white        | 179.0223 | 21.5369 | 0.689094 | 0.19811  | 181.132  |
| gi 178056676 ref NM_001123078.1 | green        | 133.2682 | 40.8634 | 0.869706 | 0.055341 | 658.606  |
| gi 178056709 ref NM_001123194.1 | navy         | 165.3578 | 39.5602 | 0.98155  | 0.003    | 10.532   |
| gi 178056815 ref NM_001123159.1 | greenyellow  | 206.6141 | 46.9681 | 0.956188 | 0.010936 | 23.718   |
| gi 178056859 ref NM_001123091.1 | brown        | 207.8385 | 52.2631 | 0.771775 | 0.126306 | 40.868   |
| gi 178056883 ref NM_001123198.1 | blue         | 680.0855 | 186.752 | 0.923497 | 0.025108 | 14.042   |
| gi 178057054 ref NM_001123079.1 | blue         | 812.493  | 233.296 | 0.968075 | 0.006814 | 15.398   |
| gi 178057066 ref NM_001123096.1 | tan          | 857.7605 | 65.8309 | 0.98905  | 0.001373 | 36.464   |
| gi 178057124 ref NM_001123104.1 | turquoise    | 474.0088 | 156.283 | 0.829432 | 0.082365 | 20.538   |
| gi 178057176 ref NM_001123090.1 | darkmagenta  | 956.7564 | 26.5184 | 0.990059 | 0.001188 | 22.168   |
| gi 178057317 ref NM_001123205.1 | brown        | 181.7331 | 58.5644 | 0.934788 | 0.019794 | 21.078   |
| gi 187672044 gb EU650276.1      | brown        | 66.94381 | 10.4781 | 0.327448 | 0.590655 | 18.554   |
| gi 190360618 ref NM_001128433.1 | purple       | 134.9639 | 22.1902 | 0.871522 | 0.054203 | 159.776  |
| gi 190360620 ref NM_001128486.1 | darkgreen    | 189.1172 | 25.0379 | 0.908482 | 0.032775 | 4.906    |
| gi 190360638 ref NM_001128469.1 | pink         | 232.5229 | 69.6185 | 0.984952 | 0.002211 | 17.546   |
| gi 190360656 ref NM_001128470.1 | brown        | 64.5935  | 24.8378 | 0.497805 | 0.393424 | 108.134  |
| gi 1912 emb X07617.1            | turquoise    | 188.9361 | 52.2085 | 0.4682   | 0.426428 | 10.738   |
| gi 194018685 ref NM_001129963.1 | pink         | 227.5396 | 56.723  | 0.918519 | 0.027576 | 523.638  |
| gi 194018701 ref NM_001129947.1 | brown        | 157.9308 | 26.3926 | 0.463079 | 0.432198 | 6032.722 |
| gi 194018717 ref NM_001129954.1 | blue         | 921.0166 | 246.825 | 0.98352  | 0.002533 | 2239.262 |
| gi 194018721 ref NM_001129949.1 | greenyellow  | 179.912  | 42.4807 | 0.92932  | 0.022316 | 35947.28 |
| gi 194033408 ref XM_001926440.1 | navy         | 160.0868 | 44.6338 | 0.99533  | 0.000383 | 151.096  |
| gi 194033418 ref XM_001924233.1 | purple       | 214.6251 | 20.9336 | -0.79833 | 0.105365 | 11.806   |
| gi 194033446 ref XM_001927265.1 | darkred      | 251.5746 | 43.1011 | 0.983624 | 0.002509 | 9.212    |
| gi 194033502 ref XM_001926129.1 | turquoise    | 387.8784 | 132.045 | 0.797355 | 0.106115 | 9.904    |
| gi 194033586 ref XM_001929183.1 | tan          | 952.0397 | 63.8208 | 0.98164  | 0.002978 | 16.118   |
| gi 194033590 ref XM_001929195.1 | navy         | 222.4307 | 26.2088 | 0.719899 | 0.170279 | 212.95   |
| gi 194033594 ref XM_001927795.1 | turquoise    | 609.2366 | 141.928 | 0.812571 | 0.094621 | 16.172   |
| gi 194033596 ref XM_001927813.1 | midnightblue | 149.123  | 43.9488 | 0.984274 | 0.002362 | 9.594    |
| gi 194033615 ref XM_001924714.1 | white        | 975.2162 | 27.3158 | 0.76907  | 0.128501 | 6.612    |
| gi 194033638 ref XM_001927936.1 | turquoise    | 872.52   | 249.219 | 0.958869 | 0.009951 | 28.282   |
| gi 194033649 ref XM_001925294.1 | pink         | 242.8828 | 71.8268 | 0.995377 | 0.000377 | 4.69     |
| gi 194033677 ref XM_001928828.1 | violet       | 996.2317 | 69.2339 | 0.982324 | 0.002814 | 17.056   |
| gi 194033685 ref XM_001926077.1 | royalblue    | 187.6305 | 9.87897 | 0.70114  | 0.187085 | 39.186   |
| gi 194033718 ref XM_001926719.1 | turquoise    | 283.0096 | 89.5339 | 0.696456 | 0.191351 | 19.76    |
| gi 194033751 ref XM_001924525.1 | navy         | 328.0041 | 28.8128 | 0.81625  | 0.091903 | 3.38     |
| gi 194033753 ref XM_001924715.1 | darkorange   | 204.5019 | 16.1213 | 0.903703 | 0.035349 | 14.704   |
| gi 194033755 ref XM_001924851.1 | royalblue    | 274.51   | 29.3192 | 0.951787 | 0.012616 | 22.558   |
| gi 194033859 ref XM_001927866.1 | orange       | 476.563  | 33.5592 | 0.987032 | 0.001769 | 81.928   |
| gi 194033888 ref XM_001925347.1 | turquoise    | 841.4294 | 261.429 | 0.960156 | 0.00949  | 173.606  |

|                                 |               |          |         |          |          |          |
|---------------------------------|---------------|----------|---------|----------|----------|----------|
| gi 194033964 ref XM_001925719.1 | pink          | 266.4503 | 75.4213 | 0.998653 | 5.93E-05 | 3.07     |
| gi 194034011 ref XM_001927812.1 | darkturquoise | 141.0996 | 26.5632 | 0.924255 | 0.024738 | 51.272   |
| gi 194034018 ref XM_001925500.1 | blue          | 916.8302 | 214.58  | 0.95115  | 0.012865 | 14.26    |
| gi 194034042 ref XM_001925859.1 | blue          | 863.4749 | 245.5   | 0.98138  | 0.003042 | 20.87    |
| gi 194034126 ref XM_001926626.1 | red           | 598.4533 | 105.59  | 0.989447 | 0.001299 | 9.484    |
| gi 194034144 ref XM_001926437.1 | blue          | 666.2451 | 188.907 | 0.921806 | 0.025938 | 16.962   |
| gi 194034148 ref XM_001924679.1 | turquoise     | 481.903  | 136.436 | 0.776797 | 0.122259 | 54.886   |
| gi 194034158 ref XM_001927669.1 | navy          | 282.0872 | 32.5847 | 0.856632 | 0.063745 | 50.492   |
| gi 194034162 ref XM_001925693.1 | darkorange    | 151.8765 | 14.5789 | 0.861842 | 0.060351 | 135.57   |
| gi 194034164 ref XM_001925794.1 | yellowgreen   | 188.2427 | 18.2057 | 0.992248 | 0.000818 | 17.268   |
| gi 194034166 ref XM_001925915.1 | pink          | 95.65332 | 6.93954 | -0.06497 | 0.917336 | 40.52    |
| gi 194034220 ref XM_001928748.1 | blue          | 845.8631 | 198.025 | 0.930614 | 0.021711 | 32.588   |
| gi 194034226 ref XM_001928937.1 | grey60        | 998.2986 | 59.5412 | 0.985723 | 0.002043 | 126.722  |
| gi 194034238 ref XM_001924848.1 | yellow        | 252.6582 | 89.7001 | 0.934221 | 0.020051 | 18.258   |
| gi 194034244 ref XM_001925555.1 | paleturquoise | 230.8075 | 16.5003 | 0.909737 | 0.032109 | 23.098   |
| gi 194034359 ref XM_001927037.1 | pink          | 183.1012 | 52.0458 | 0.918037 | 0.02782  | 44.598   |
| gi 194034393 ref XM_001926625.1 | blue          | 749.9425 | 226.56  | 0.963073 | 0.008471 | 21.39    |
| gi 194034443 ref XM_001928249.1 | blue          | 639.9597 | 139.618 | 0.853613 | 0.065738 | 4.93     |
| gi 194034463 ref XM_001926549.1 | red           | 446.8914 | 103.026 | 0.984366 | 0.002341 | 95.66    |
| gi 194034501 ref XM_001925096.1 | darkgreen     | 272.229  | 37.7773 | 0.985395 | 0.002114 | 9.198    |
| gi 194034516 ref XM_001925886.1 | paleturquoise | 183.3617 | 20.5008 | 0.965517 | 0.007647 | 5.476    |
| gi 194034537 ref XM_001925533.1 | green         | 146.2075 | 46.917  | 0.91506  | 0.029335 | 30.196   |
| gi 194034539 ref XM_001927513.1 | grey60        | 961.7969 | 60.8154 | 0.989948 | 0.001208 | 9.534    |
| gi 194034592 ref XM_001925373.1 | green         | 176.691  | 18.3124 | 0.140065 | 0.822248 | 28.932   |
| gi 194034626 ref XM_001929026.1 | darkgrey      | 168.826  | 30.1169 | 0.964961 | 0.007832 | 52.34    |
| gi 194034657 ref XM_001924580.1 | turquoise     | 641.6887 | 212.536 | 0.875256 | 0.051888 | 38.634   |
| gi 194034678 ref XM_001928189.1 | darkgrey      | 174.4439 | 30.2679 | 0.9664   | 0.007356 | 19.506   |
| gi 194034680 ref XM_001925553.1 | brown         | 43.72305 | 14.3205 | 0.442735 | 0.455291 | 11.6     |
| gi 194034692 ref XM_001928709.1 | salmon        | 154.463  | 39.7775 | 0.93034  | 0.021838 | 14.758   |
| gi 194034703 ref XM_001926714.1 | turquoise     | 455.6053 | 151.525 | 0.774891 | 0.12379  | 9.778    |
| gi 194034713 ref XM_001925291.1 | yellow        | 208.2537 | 68.6188 | 0.861295 | 0.060705 | 13.564   |
| gi 194034832 ref XM_001928118.1 | blue          | 940.4062 | 203.946 | 0.941748 | 0.016729 | 16.266   |
| gi 194034834 ref XM_001925793.1 | turquoise     | 403.1444 | 136.405 | 0.775645 | 0.123184 | 66.112   |
| gi 194034838 ref XM_001928143.1 | brown         | 85.51917 | 32.9036 | 0.586621 | 0.298469 | 1.468    |
| gi 194034874 ref XM_001929334.1 | lightyellow   | 905.2698 | 62.1801 | 0.995625 | 0.000347 | 5.54     |
| gi 194034890 ref XM_001929399.1 | brown         | 91.79244 | 23.7168 | 0.556803 | 0.329615 | 11.286   |
| gi 194034900 ref XM_001924788.1 | midnightblue  | 205.9459 | 34.5559 | 0.916677 | 0.028509 | 27.452   |
| gi 194034933 ref XM_001927442.1 | violet        | 950.857  | 75.0263 | 0.998713 | 5.54E-05 | 24.2     |
| gi 194034969 ref XM_001925674.1 | turquoise     | 710.7502 | 233.314 | 0.91232  | 0.030753 | 1460.734 |
| gi 194035059 ref XM_001924311.1 | brown         | 98.96395 | 25.6601 | 0.707504 | 0.181332 | 1.54     |
| gi 194035100 ref XM_001925477.1 | darkmagenta   | 961.581  | 26.9156 | 0.993435 | 0.000638 | 15.556   |
| gi 194035108 ref XM_001926680.1 | purple        | 86.88527 | 21.7128 | 0.901603 | 0.0365   | 32.97    |
| gi 194035136 ref XM_001924656.1 | paleturquoise | 137.4029 | 15.1656 | 0.891067 | 0.042447 | 83.466   |
| gi 194035172 ref XM_001924332.1 | paleturquoise | 134.0747 | 14.5313 | 0.881154 | 0.048296 | 31.85    |
| gi 194035184 ref XM_001924626.1 | navy          | 153.0856 | 11.5346 | -0.57134 | 0.314331 | 26.958   |
| gi 194035216 ref XM_001928520.1 | salmon        | 301.2788 | 40.4538 | 0.932253 | 0.020951 | 96.986   |
| gi 194035235 ref XM_001924419.1 | grey          | 147.5461 | 13.9917 | -0.89277 | 0.041469 | 47.896   |
| gi 194035245 ref XM_001924870.1 | turquoise     | 402.5867 | 104.318 | 0.704571 | 0.183977 | 10.494   |

|                                 |               |          |         |          |          |         |
|---------------------------------|---------------|----------|---------|----------|----------|---------|
| gi 194035288 ref XM_001927095.1 | turquoise     | 284.3998 | 89.5992 | 0.667834 | 0.217995 | 15.592  |
| gi 194035296 ref XM_001927594.1 | turquoise     | 898.6121 | 261.192 | 0.97454  | 0.004858 | 65.772  |
| gi 194035304 ref XM_001928396.1 | grey          | 161.6478 | 14.9909 | -0.93437 | 0.019984 | 6.212   |
| gi 194035333 ref XM_001925774.1 | brown         | 186.6806 | 26.9637 | 0.577294 | 0.308127 | 22.956  |
| gi 194035378 ref XM_001924314.1 | greenyellow   | 220.0961 | 42.7806 | 0.932626 | 0.020779 | 3.918   |
| gi 194035408 ref XM_001926476.1 | blue          | 865.3024 | 227.452 | 0.962341 | 0.008723 | 42.506  |
| gi 194035493 ref XM_001926740.1 | orange        | 568.2207 | 33.0168 | 0.982011 | 0.002888 | 4.98    |
| gi 194035503 ref XM_001927458.1 | brown         | 136.4275 | 31.6557 | 0.555127 | 0.33139  | 40.074  |
| gi 194035509 ref XM_001927620.1 | pink          | 220.2194 | 41.2816 | 0.829454 | 0.082349 | 11.47   |
| gi 194035517 ref XM_001925462.1 | tan           | 878.2748 | 66.6415 | 0.991596 | 0.000924 | 22.512  |
| gi 194035561 ref XM_001924535.1 | blue          | 965.6501 | 222.417 | 0.96186  | 0.00889  | 8.746   |
| gi 194035592 ref XM_001927531.1 | navy          | 156.3972 | 6.26677 | 0.358933 | 0.553005 | 29.55   |
| gi 194035600 ref XM_001927804.1 | turquoise     | 805.3322 | 238.885 | 0.948993 | 0.013722 | 260.366 |
| gi 194035607 ref XM_001928505.1 | black         | 982.3185 | 98.6876 | 0.998003 | 0.000107 | 16.798  |
| gi 194035627 ref XM_001924280.1 | green         | 74.21428 | 34.6343 | 0.780334 | 0.119433 | 25.72   |
| gi 194035657 ref XM_001928441.1 | turquoise     | 251.0297 | 54.8413 | 0.524011 | 0.364743 | 18.726  |
| gi 194035679 ref XM_001925389.1 | turquoise     | 345.9063 | 105.15  | 0.714741 | 0.174854 | 312.33  |
| gi 194035693 ref XM_001925021.1 | turquoise     | 913.6352 | 269.594 | 0.981549 | 0.003    | 7.324   |
| gi 194035716 ref XM_001925987.1 | turquoise     | 333.9509 | 88.8334 | 0.620507 | 0.264073 | 29.974  |
| gi 194035722 ref XM_001926997.1 | royalblue     | 208.252  | 6.46875 | 0.502731 | 0.387994 | 19.588  |
| gi 194035733 ref XM_001925711.1 | midnightblue  | 110.2628 | 18.7787 | 0.760729 | 0.135342 | 11.688  |
| gi 194035737 ref XM_001928295.1 | royalblue     | 157.6933 | 9.36749 | 0.557467 | 0.328914 | 160.806 |
| gi 194035770 ref XM_001927929.1 | brown         | 85.16901 | 33.0374 | 0.564902 | 0.321078 | 2.14    |
| gi 194035776 ref XM_001929384.1 | purple        | 86.64428 | 13.3998 | 0.927795 | 0.023037 | 47.246  |
| gi 194035796 ref XM_001927740.1 | turquoise     | 896.0149 | 250.741 | 0.968781 | 0.00659  | 34.93   |
| gi 194035836 ref XM_001928869.1 | grey60        | 956.4633 | 62.9743 | 0.997261 | 0.000172 | 55.492  |
| gi 194035846 ref XM_001928960.1 | blue          | 810.7006 | 218.865 | 0.956442 | 0.010841 | 90.038  |
| gi 194035848 ref XM_001928966.1 | green         | 121.9564 | 38.5888 | 0.838497 | 0.075997 | 494.762 |
| gi 194035852 ref XM_001929031.1 | darkturquoise | 183.5372 | 30.7862 | 0.958794 | 0.009979 | 40.736  |
| gi 194035954 ref XM_001927715.1 | royalblue     | 187.1107 | 20.6478 | 0.83603  | 0.077714 | 9.004   |
| gi 194035974 ref XM_001924643.1 | green         | 119.0966 | 33.9734 | 0.801855 | 0.102674 | 20.486  |
| gi 194035999 ref XM_001924070.1 | turquoise     | 557.7437 | 187.665 | 0.845993 | 0.070851 | 225.328 |
| gi 194036005 ref XM_001926377.1 | lightyellow   | 997.1174 | 61.8506 | 0.994478 | 0.000492 | 96.44   |
| gi 194036011 ref XM_001926398.1 | yellow        | 217.4493 | 70.1705 | 0.869333 | 0.055575 | 7.286   |
| gi 194036046 ref XM_001928851.1 | blue          | 807.1938 | 191.194 | 0.923828 | 0.024946 | 21.238  |
| gi 194036068 ref XM_001926844.1 | tan           | 845.1779 | 56.9761 | 0.960098 | 0.009511 | 6.268   |
| gi 194036118 ref XM_001927231.1 | magenta       | 253.7862 | 75.1479 | 0.979839 | 0.003426 | 4.618   |
| gi 194036127 ref XM_001929512.1 | yellowgreen   | 156.4013 | 14.9862 | 0.947902 | 0.014162 | 87.66   |
| gi 194036134 ref XM_001929587.1 | pink          | 258.3144 | 53.6278 | 0.901905 | 0.036333 | 15.912  |
| gi 194036224 ref XM_001929641.1 | grey          | 300.3437 | 12.8667 | 0.966334 | 0.007378 | 82.056  |
| gi 194036226 ref XM_001929643.1 | lightcyan     | 244.1518 | 37.6067 | 0.942398 | 0.016451 | 33.656  |
| gi 194036240 ref XM_001929654.1 | lightyellow   | 963.3138 | 63.3242 | 0.999312 | 2.17E-05 | 19.302  |
| gi 194036252 ref XM_001929660.1 | purple        | 91.85103 | 9.51437 | -0.53222 | 0.355871 | 45.406  |
| gi 194036256 ref XM_001929662.1 | violet        | 931.0103 | 72.9269 | 0.993016 | 0.0007   | 2.782   |
| gi 194036268 ref XM_001929668.1 | turquoise     | 548.9216 | 163.825 | 0.836972 | 0.077057 | 8.93    |
| gi 194036284 ref XM_001924881.1 | pink          | 159.7745 | 46.705  | 0.898653 | 0.038136 | 33.212  |
| gi 194036295 ref XM_001926489.1 | tan           | 929.2363 | 68.6359 | 0.997811 | 0.000123 | 12.766  |
| gi 194036309 ref XM_001927637.1 | brown         | 75.59887 | 26.4013 | 0.569449 | 0.31631  | 388.142 |

|                                 |              |          |         |          |          |         |
|---------------------------------|--------------|----------|---------|----------|----------|---------|
| gi 194036315 ref XM_001927860.1 | violet       | 967.3498 | 74.7119 | 0.997864 | 0.000118 | 77.012  |
| gi 194036317 ref XM_001927969.1 | tan          | 773.1072 | 59.585  | 0.969063 | 0.006502 | 8.484   |
| gi 194036348 ref XM_001928686.1 | salmon       | 178.4925 | 47.211  | 0.973131 | 0.005266 | 22.654  |
| gi 194036390 ref XM_001929343.1 | pink         | 83.90439 | 15.3541 | 0.30723  | 0.615067 | 48.934  |
| gi 194036406 ref XM_001927918.1 | lightyellow  | 995.0191 | 62.667  | 0.997149 | 0.000183 | 21.938  |
| gi 194036424 ref XM_001925710.1 | darkgrey     | 155.3508 | 25.0728 | 0.917495 | 0.028094 | 39.886  |
| gi 194036434 ref XM_001926977.1 | navy         | 92.07783 | 28.5996 | 0.814105 | 0.093485 | 15.264  |
| gi 194036458 ref XM_001928544.1 | turquoise    | 935.6276 | 269.367 | 0.986139 | 0.001955 | 3.656   |
| gi 194036460 ref XM_001926279.1 | darkorange   | 155.9159 | 20.8064 | 0.943879 | 0.015825 | 6.888   |
| gi 194036462 ref XM_001928649.1 | turquoise    | 845.8552 | 260.825 | 0.969802 | 0.006271 | 70.654  |
| gi 194036467 ref XM_001928805.1 | blue         | 780.6029 | 216.106 | 0.948057 | 0.0141   | 37.092  |
| gi 194036542 ref XM_001925670.1 | turquoise    | 305.0244 | 70.201  | 0.60927  | 0.275356 | 100.412 |
| gi 194036571 ref XM_001927806.1 | turquoise    | 934.8652 | 258.145 | 0.984206 | 0.002377 | 37.834  |
| gi 194036621 ref XM_001927321.1 | brown        | 91.06317 | 37.3743 | 0.61407  | 0.270521 | 118.942 |
| gi 194036623 ref XM_001927665.1 | blue         | 541.8101 | 152.131 | 0.873397 | 0.053037 | 14.874  |
| gi 194036639 ref XM_001924618.1 | darkgrey     | 162.0982 | 27.9207 | 0.938299 | 0.018227 | 48.152  |
| gi 194036656 ref XM_001928010.1 | tan          | 921.77   | 65.04   | 0.985749 | 0.002038 | 28.264  |
| gi 194036668 ref XM_001926328.1 | blue         | 849.0143 | 246.134 | 0.984209 | 0.002376 | 22.214  |
| gi 194036687 ref XM_001926116.1 | green        | 111.9378 | 61.7205 | 0.993084 | 0.00069  | 194.234 |
| gi 194036700 ref XM_001927375.1 | black        | 956.2138 | 94.5446 | 0.989358 | 0.001316 | 9.32    |
| gi 194036737 ref XM_001927243.1 | turquoise    | 945.2664 | 267.012 | 0.990063 | 0.001187 | 62.046  |
| gi 194036739 ref XM_001927255.1 | turquoise    | 532.7841 | 135.137 | 0.797551 | 0.105964 | 15.358  |
| gi 194036748 ref XM_001928875.1 | greenyellow  | 202.2133 | 54.714  | 0.994627 | 0.000472 | 7.872   |
| gi 194036762 ref XM_001925928.1 | turquoise    | 950.3888 | 271.442 | 0.995154 | 0.000405 | 126.688 |
| gi 194036768 ref XM_001927459.1 | turquoise    | 529.3778 | 176.015 | 0.864499 | 0.058643 | 2.704   |
| gi 194036770 ref XM_001925929.1 | midnightblue | 141.3761 | 36.0412 | 0.926731 | 0.023544 | 7.774   |
| gi 194036795 ref XM_001926863.1 | brown        | 110.8326 | 28.0072 | 0.741129 | 0.151821 | 41.74   |
| gi 194036805 ref XM_001928924.1 | midnightblue | 164.4441 | 40.8077 | 0.962774 | 0.008574 | 34.222  |
| gi 194036851 ref XM_001928643.1 | turquoise    | 340.2573 | 111.37  | 0.726689 | 0.164308 | 45.586  |
| gi 194036879 ref XM_001927666.1 | blue         | 795.9015 | 196.662 | 0.931964 | 0.021084 | 229.56  |
| gi 194036893 ref XM_001927714.1 | blue         | 704.4409 | 209.634 | 0.944388 | 0.015611 | 16.064  |
| gi 194036901 ref XM_001927323.1 | tan          | 926.0184 | 66.9487 | 0.992401 | 0.000794 | 53.808  |
| gi 194036936 ref XM_001925783.1 | turquoise    | 268.7037 | 80.1374 | 0.618594 | 0.265985 | 13.186  |
| gi 194036950 ref XM_001928451.1 | sienna3      | 971.2171 | 23.2389 | 0.976713 | 0.004251 | 15.93   |
| gi 194036956 ref XM_001924342.1 | salmon       | 262.6368 | 45.6961 | 0.962815 | 0.00856  | 19.776  |
| gi 194036972 ref XM_001927228.1 | blue         | 751.763  | 166.354 | 0.893363 | 0.041127 | 22.542  |
| gi 194036974 ref XM_001927747.1 | navy         | 274.8684 | 27.3027 | 0.767853 | 0.129492 | 261.176 |
| gi 194037015 ref XM_001929116.1 | turquoise    | 483.2103 | 97.8245 | 0.722893 | 0.167639 | 98.864  |
| gi 194037094 ref XM_001927574.1 | midnightblue | 137.8873 | 35.5807 | 0.92299  | 0.025355 | 138.698 |
| gi 194037139 ref XM_001925875.1 | pink         | 116.0606 | 21.6344 | 0.636471 | 0.248264 | 10.512  |
| gi 194037172 ref XM_001928663.1 | pink         | 288.7351 | 69.1228 | 0.958254 | 0.010175 | 58.214  |
| gi 194037193 ref XM_001929169.1 | darkmagenta  | 886.1265 | 25.2637 | 0.980496 | 0.00326  | 9.87    |
| gi 194037198 ref XM_001929213.1 | turquoise    | 168.8525 | 47.8366 | 0.444833 | 0.452898 | 46.564  |
| gi 194037354 ref XM_001926198.1 | magenta      | 271.3623 | 77.1143 | 0.98477  | 0.002251 | 27.72   |
| gi 194037372 ref XM_001927549.1 | blue         | 775.9735 | 225.104 | 0.958719 | 0.010006 | 28.362  |
| gi 194037379 ref XM_001925252.1 | lightyellow  | 961.6051 | 63.1842 | 0.998873 | 4.54E-05 | 15.102  |
| gi 194037499 ref XM_001928879.1 | skyblue      | 182.4084 | 30.6301 | 0.987173 | 0.001741 | 22.122  |
| gi 194037532 ref XM_001929272.1 | pink         | 282.4987 | 48.3518 | 0.854618 | 0.065072 | 345.362 |



|                                 |             |          |         |          |          |         |
|---------------------------------|-------------|----------|---------|----------|----------|---------|
| gi 194037543 ref XM_001929293.1 | turquoise   | 855.9705 | 250.253 | 0.968856 | 0.006567 | 27.42   |
| gi 194037553 ref XM_001929410.1 | red         | 484.8697 | 109.634 | 0.997698 | 0.000133 | 867.136 |
| gi 194037555 ref XM_001929413.1 | navy        | 135.2249 | 40.8175 | 0.936987 | 0.018808 | 203.322 |
| gi 194037571 ref XM_001929457.1 | darkmagenta | 893.6666 | 25.0977 | 0.979691 | 0.003464 | 12.368  |
| gi 194037611 ref XM_001925424.1 | pink        | 183.6751 | 50.0974 | 0.912432 | 0.030694 | 20.76   |
| gi 194037617 ref XM_001927127.1 | turquoise   | 554.5856 | 148.127 | 0.82088  | 0.088516 | 34.656  |
| gi 194037680 ref XM_001926355.1 | tan         | 649.7879 | 48.6092 | 0.925086 | 0.024335 | 11.066  |
| gi 194037682 ref XM_001927000.1 | darkgrey    | 216.5537 | 32.2873 | 0.978951 | 0.003654 | 27.436  |
| gi 194037707 ref XM_001924251.1 | skyblue     | 261.1148 | 30.2876 | 0.977752 | 0.00397  | 14.84   |
| gi 194037755 ref XM_001925059.1 | yellow      | 255.8213 | 91.8695 | 0.929971 | 0.022011 | 16.118  |
| gi 194037797 ref XM_001925445.1 | red         | 539.7694 | 107.228 | 0.992871 | 0.000722 | 21.686  |
| gi 194037819 ref XM_001928548.1 | turquoise   | 717.8124 | 235.512 | 0.91865  | 0.02751  | 4.614   |
| gi 194037863 ref XM_001925621.1 | royalblue   | 147.1638 | 13.9479 | 0.711684 | 0.177583 | 62.554  |
| gi 194037865 ref XM_001928013.1 | tan         | 680.1668 | 50.1113 | 0.93178  | 0.021169 | 42.366  |
| gi 194037879 ref XM_001925784.1 | tan         | 945.0851 | 68.5723 | 0.997451 | 0.000154 | 17.48   |
| gi 194037903 ref XM_001927180.1 | red         | 442.1542 | 103.4   | 0.984878 | 0.002227 | 18.88   |
| gi 194037930 ref XM_001928852.1 | black       | 953.795  | 98.524  | 0.998003 | 0.000107 | 30.15   |
| gi 194037950 ref XM_001926744.1 | green       | 96.03611 | 16.215  | 0.491902 | 0.399956 | 8.518   |
| gi 194037952 ref XM_001924515.1 | blue        | 814.3735 | 210.85  | 0.942673 | 0.016334 | 58.406  |
| gi 194037997 ref XM_001926200.1 | blue        | 590.3223 | 134.702 | 0.845425 | 0.071237 | 23.21   |
| gi 194038023 ref XM_001928502.1 | darkorange  | 149.6911 | 19.0211 | 0.953306 | 0.012027 | 38.722  |
| gi 194038027 ref XM_001928638.1 | lightyellow | 944.4728 | 63.1271 | 0.998695 | 5.66E-05 | 4.084   |
| gi 194038031 ref XM_001928655.1 | salmon      | 143.8825 | 33.9743 | 0.889126 | 0.043573 | 7.16    |
| gi 194038037 ref XM_001929120.1 | greenyellow | 198.8508 | 50.3984 | 0.974644 | 0.004828 | 91.168  |
| gi 194038045 ref XM_001925447.1 | blue        | 771.5207 | 223.508 | 0.963441 | 0.008345 | 10.212  |
| gi 194038066 ref XM_001927909.1 | blue        | 608.5952 | 174.819 | 0.9055   | 0.034374 | 177.242 |
| gi 194038088 ref XM_001925288.1 | turquoise   | 493.1399 | 109.161 | 0.726547 | 0.164433 | 40.872  |
| gi 194038104 ref XM_001925531.1 | blue        | 561.083  | 118.298 | 0.819698 | 0.089377 | 23.016  |
| gi 194038194 ref XM_001927473.1 | turquoise   | 182.0386 | 42.1231 | 0.458064 | 0.437866 | 80.078  |
| gi 194038223 ref XM_001926312.1 | darkgreen   | 246.2013 | 33.5443 | 0.938246 | 0.01825  | 4.916   |
| gi 194038225 ref XM_001926546.1 | pink        | 224.9883 | 38.5148 | 0.816173 | 0.091959 | 13.742  |
| gi 194038241 ref XM_001927985.1 | turquoise   | 676.223  | 223.675 | 0.900047 | 0.03736  | 35.632  |
| gi 194038245 ref XM_001928187.1 | greenyellow | 134.2576 | 33.6988 | 0.872738 | 0.053445 | 172.428 |
| gi 194038277 ref XM_001926890.1 | grey60      | 941.931  | 62.29   | 0.995057 | 0.000417 | 35.566  |
| gi 194038297 ref XM_001926748.1 | turquoise   | 868.5568 | 241.736 | 0.955156 | 0.011323 | 4.66    |
| gi 194038313 ref XM_001925341.1 | greenyellow | 184.1793 | 51.2446 | 0.978277 | 0.003831 | 115.04  |
| gi 194038369 ref XM_001929075.1 | yellow      | 201.4081 | 59.8966 | 0.841889 | 0.073655 | 69.342  |
| gi 194038432 ref XM_001925495.1 | sienna3     | 919.3437 | 25.633  | 0.996229 | 0.000278 | 18.714  |
| gi 194038464 ref XM_001924308.1 | navy        | 150.1102 | 42.3165 | 0.965043 | 0.007804 | 332.15  |
| gi 194038478 ref XM_001926160.1 | turquoise   | 911.626  | 265.449 | 0.978131 | 0.003869 | 13.48   |
| gi 194038505 ref XM_001928042.1 | red         | 632.5955 | 99.4023 | 0.975238 | 0.00466  | 19.136  |
| gi 194038533 ref XM_001929074.1 | turquoise   | 681.6312 | 225.014 | 0.898841 | 0.038031 | 49.75   |
| gi 194038541 ref XM_001929173.1 | green       | 134.1047 | 42.1273 | 0.881808 | 0.047903 | 87.12   |
| gi 194038545 ref XM_001929151.1 | darkgreen   | 241.3591 | 34.9315 | 0.951314 | 0.012801 | 11.66   |
| gi 194038579 ref XM_001926122.1 | blue        | 978.4778 | 233.264 | 0.972156 | 0.005554 | 24.56   |
| gi 194038585 ref XM_001926711.1 | navy        | 193.521  | 14.2361 | 0.489098 | 0.403066 | 201.464 |
| gi 194038610 ref XM_001926123.1 | red         | 323.1933 | 74.4386 | 0.91451  | 0.029618 | 9.818   |
| gi 194038708 ref XM_001928665.1 | violet      | 978.5996 | 74.4686 | 0.99721  | 0.000177 | 121.05  |

|                                 |               |          |         |          |          |         |
|---------------------------------|---------------|----------|---------|----------|----------|---------|
| gi 194038714 ref XM_001926092.1 | turquoise     | 450.1252 | 126.896 | 0.77038  | 0.127436 | 8.744   |
| gi 194038723 ref XM_001929103.1 | pink          | 95.22659 | 15.0558 | 0.153682 | 0.805099 | 22.28   |
| gi 194038729 ref XM_001929090.1 | midnightblue  | 163.1643 | 42.7289 | 0.979433 | 0.00353  | 435.296 |
| gi 194038781 ref XM_001926473.1 | blue          | 879.8301 | 225.34  | 0.96329  | 0.008397 | 95.484  |
| gi 194038808 ref XM_001924784.1 | turquoise     | 139.3534 | 43.3377 | 0.443236 | 0.454719 | 90.608  |
| gi 194038816 ref XM_001925028.1 | turquoise     | 743.4067 | 228.898 | 0.917707 | 0.027986 | 7.486   |
| gi 194038854 ref XM_001928014.1 | orange        | 349.477  | 31.6226 | 0.970099 | 0.006179 | 15.852  |
| gi 194038856 ref XM_001925833.1 | white         | 881.545  | 28.9541 | 0.832233 | 0.080381 | 15.706  |
| gi 194038862 ref XM_001928271.1 | purple        | 119.3315 | 18.0196 | 0.747035 | 0.146797 | 59.938  |
| gi 194038869 ref XM_001928468.1 | lightyellow   | 803.2478 | 57.3822 | 0.979412 | 0.003535 | 2.34    |
| gi 194038879 ref XM_001928723.1 | turquoise     | 407.8391 | 130.382 | 0.761271 | 0.134894 | 8.2     |
| gi 194038896 ref XM_001924415.1 | navy          | 64.35461 | 5.53704 | -0.07149 | 0.909052 | 37.826  |
| gi 194038900 ref XM_001925133.1 | turquoise     | 446.2598 | 151.363 | 0.771936 | 0.126175 | 20.734  |
| gi 194038904 ref XM_001924445.1 | darkmagenta   | 962.0912 | 26.7377 | 0.99177  | 0.000895 | 191.306 |
| gi 194038910 ref XM_001926121.1 | magenta       | 250.5831 | 77.1269 | 0.986672 | 0.001843 | 14.434  |
| gi 194038924 ref XM_001927577.1 | lightyellow   | 969.0572 | 63.3827 | 0.999497 | 1.36E-05 | 31.654  |
| gi 194038958 ref XM_001929118.1 | tan           | 903.0567 | 67.7928 | 0.99554  | 0.000357 | 18.33   |
| gi 194039226 ref XM_001928899.1 | grey          | 175.3473 | 11.729  | 0.387028 | 0.519815 | 222.37  |
| gi 194039238 ref XM_001924410.1 | violet        | 923.9278 | 72.6127 | 0.992143 | 0.000835 | 3.28    |
| gi 194039264 ref XM_001927148.1 | white         | 175.2323 | 21.095  | 0.709521 | 0.179521 | 25.722  |
| gi 194039300 ref XM_001928656.1 | brown         | 92.5233  | 22.3856 | 0.691663 | 0.195744 | 4.25    |
| gi 194039310 ref XM_001929246.1 | red           | 682.0386 | 101.288 | 0.979307 | 0.003562 | 23.744  |
| gi 194039316 ref XM_001929265.1 | purple        | 95       | 13.7912 | 0.736493 | 0.155799 | 72.066  |
| gi 194039362 ref XM_001929482.1 | green         | 157.0758 | 41.6463 | 0.891538 | 0.042175 | 38.924  |
| gi 194039364 ref XM_001929510.1 | grey60        | 804.4638 | 54.6482 | 0.968347 | 0.006728 | 9.754   |
| gi 194039388 ref XM_001929568.1 | blue          | 678.8386 | 205.636 | 0.939781 | 0.017578 | 20.524  |
| gi 194039390 ref XM_001929570.1 | turquoise     | 667.0287 | 183.216 | 0.884705 | 0.046174 | 375.328 |
| gi 194039392 ref XM_001929581.1 | salmon        | 258.5169 | 43.7403 | 0.950149 | 0.013261 | 10.976  |
| gi 194039480 ref XM_001926227.1 | sienna3       | 995.9706 | 25.364  | 0.994064 | 0.000549 | 82.714  |
| gi 194039486 ref XM_001927002.1 | yellow        | 247.5099 | 83.4507 | 0.915426 | 0.029148 | 43.004  |
| gi 194039490 ref XM_001927338.1 | red           | 647.6362 | 100.761 | 0.9789   | 0.003668 | 221.372 |
| gi 194039546 ref XM_001928863.1 | turquoise     | 735.8243 | 239.751 | 0.923612 | 0.025051 | 13.1    |
| gi 194039573 ref XM_001927296.1 | blue          | 830.1221 | 199.443 | 0.932392 | 0.020887 | 51.52   |
| gi 194039577 ref XM_001927339.1 | green         | 127.6047 | 53.2108 | 0.950138 | 0.013265 | 32.332  |
| gi 194039585 ref XM_001929378.1 | midnightblue  | 51.68645 | 12.7552 | 0.720842 | 0.169446 | 12.966  |
| gi 194039587 ref XM_001929390.1 | turquoise     | 526.138  | 166.609 | 0.842939 | 0.072934 | 26.588  |
| gi 194039595 ref XM_001929425.1 | tan           | 912.749  | 53.7084 | 0.946749 | 0.014633 | 14.456  |
| gi 194039625 ref XM_001925622.1 | blue          | 531.7364 | 125.004 | 0.830053 | 0.081924 | 3.39    |
| gi 194039636 ref XM_001927064.1 | pink          | 133.9226 | 11.1933 | 0.014556 | 0.981468 | 20.36   |
| gi 194039679 ref XM_001928732.1 | turquoise     | 847.9781 | 259.268 | 0.970972 | 0.005911 | 140.482 |
| gi 194039687 ref XM_001928955.1 | navy          | 179.3504 | 26.0351 | 0.745608 | 0.148006 | 23.954  |
| gi 194039697 ref XM_001929172.1 | blue          | 911.7039 | 199.628 | 0.936776 | 0.018901 | 33.478  |
| gi 194039707 ref XM_001929228.1 | skyblue       | 208.1497 | 28.2469 | 0.96505  | 0.007802 | 174.49  |
| gi 194039709 ref XM_001929236.1 | navy          | 130.8422 | 36.8908 | 0.903108 | 0.035674 | 75.234  |
| gi 194039733 ref XM_001928398.1 | paleturquoise | 162.5733 | 15.1354 | 0.897208 | 0.038946 | 8.956   |
| gi 194039735 ref XM_001928389.1 | salmon        | 315.0477 | 35.5896 | 0.895596 | 0.039855 | 300.868 |
| gi 194039851 ref XM_001928253.1 | blue          | 938.2549 | 233.92  | 0.972183 | 0.005546 | 50.872  |
| gi 194039979 ref XM_001927951.1 | grey60        | 975.5428 | 61.86   | 0.993509 | 0.000627 | 3.166   |

|                                 |               |          |         |          |          |         |
|---------------------------------|---------------|----------|---------|----------|----------|---------|
| gi 194040110 ref XM_001929541.1 | blue          | 842.9525 | 231.205 | 0.966519 | 0.007317 | 17.352  |
| gi 194040173 ref XM_001926225.1 | blue          | 790.9397 | 225.976 | 0.959145 | 0.009852 | 50.048  |
| gi 194040232 ref XM_001929613.1 | violet        | 959.6363 | 75.2566 | 0.999329 | 2.08E-05 | 15.852  |
| gi 194040254 ref XM_001929631.1 | greenyellow   | 204.2699 | 52.933  | 0.98921  | 0.001343 | 34.666  |
| gi 194040263 ref XM_001927880.1 | blue          | 855.2298 | 234.946 | 0.969915 | 0.006236 | 23.59   |
| gi 194040280 ref XM_001925339.1 | red           | 408.0794 | 86.1942 | 0.944252 | 0.015668 | 8.666   |
| gi 194040288 ref XM_001927655.1 | purple        | 35.86712 | 6.90554 | 0.3593   | 0.552568 | 0.96    |
| gi 194040321 ref XM_001928400.1 | tan           | 921.2054 | 67.9716 | 0.9959   | 0.000315 | 21.998  |
| gi 194040325 ref XM_001928445.1 | grey60        | 961.9348 | 60.3554 | 0.988385 | 0.0015   | 1.838   |
| gi 194040339 ref XM_001928739.1 | darkred       | 217.3701 | 37.9297 | 0.958156 | 0.01021  | 36.146  |
| gi 194040341 ref XM_001928820.1 | navy          | 288.2681 | 28.0711 | 0.796614 | 0.106685 | 26.778  |
| gi 194040377 ref XM_001929415.1 | violet        | 903.1629 | 73.4465 | 0.994365 | 0.000507 | 10.266  |
| gi 194040411 ref XM_001929558.1 | turquoise     | 555.4994 | 155.706 | 0.819394 | 0.089599 | 151.278 |
| gi 194040420 ref XM_001929571.1 | darkred       | 182.3532 | 35.151  | 0.930634 | 0.021701 | 25.016  |
| gi 194040422 ref XM_001929580.1 | violet        | 977.5664 | 74.4579 | 0.997176 | 0.00018  | 100.576 |
| gi 194040449 ref XM_001927957.1 | midnightblue  | 131.4202 | 45.3452 | 0.989981 | 0.001202 | 157.2   |
| gi 194040485 ref XM_001926913.1 | lightcyan     | 135.9143 | 10.2715 | 0.467262 | 0.427484 | 27.184  |
| gi 194040487 ref XM_001926988.1 | pink          | 80.69845 | 7.24198 | 0.204915 | 0.740931 | 8.206   |
| gi 194040489 ref XM_001927223.1 | turquoise     | 809.3883 | 253.648 | 0.965695 | 0.007588 | 20.908  |
| gi 194040496 ref XM_001928226.1 | turquoise     | 859.5822 | 259.432 | 0.961822 | 0.008903 | 2.08    |
| gi 194040529 ref XM_001924631.1 | blue          | 805.1238 | 209.119 | 0.945442 | 0.015172 | 11.47   |
| gi 194040558 ref XM_001928742.1 | turquoise     | 354.5369 | 116.087 | 0.689602 | 0.197642 | 20.194  |
| gi 194040603 ref XM_001928485.1 | blue          | 705.4799 | 161.859 | 0.886775 | 0.04495  | 19.028  |
| gi 194040616 ref XM_001929023.1 | brown         | 142.567  | 19.0246 | 0.472971 | 0.421068 | 15.71   |
| gi 194040641 ref XM_001925120.1 | violet        | 970.7774 | 72.7159 | 0.992409 | 0.000793 | 14.086  |
| gi 194040677 ref XM_001927466.1 | darkorange    | 195.5229 | 17.2581 | 0.957209 | 0.010557 | 7.91    |
| gi 194040706 ref XM_001927201.1 | lightcyan     | 301.5058 | 41.852  | 0.977979 | 0.00391  | 148.794 |
| gi 194040743 ref XM_001927771.1 | black         | 935.7865 | 96.6736 | 0.993857 | 0.000577 | 25.316  |
| gi 194040755 ref XM_001927097.1 | green         | 153.2654 | 20.6241 | 0.108539 | 0.862076 | 53.676  |
| gi 194040784 ref XM_001927731.1 | blue          | 767.8136 | 219.036 | 0.957509 | 0.010447 | 29.708  |
| gi 194040788 ref XM_001925300.1 | black         | 960.2119 | 96.5042 | 0.993141 | 0.000681 | 33.384  |
| gi 194040816 ref XM_001925581.1 | green         | 133.4246 | 43.1403 | 0.887424 | 0.044569 | 34.078  |
| gi 194040900 ref XM_001928469.1 | turquoise     | 599.4706 | 165.469 | 0.856602 | 0.063764 | 84.828  |
| gi 194040929 ref XM_001925268.1 | darkred       | 243.0272 | 30.3571 | 0.911295 | 0.031289 | 14.726  |
| gi 194040939 ref XM_001924716.1 | blue          | 822.8504 | 229.685 | 0.970291 | 0.00612  | 36.628  |
| gi 194040961 ref XM_001924920.1 | blue          | 718.4498 | 178.227 | 0.910508 | 0.031703 | 7.584   |
| gi 194040979 ref XM_001928486.1 | brown         | 92.90766 | 37.4412 | 0.822309 | 0.087479 | 293.604 |
| gi 194040981 ref XM_001928597.1 | blue          | 827.2707 | 208.926 | 0.941001 | 0.01705  | 48.94   |
| gi 194040983 ref XM_001927342.1 | darkturquoise | 184.3363 | 29.9492 | 0.953656 | 0.011893 | 106.51  |
| gi 194040993 ref XM_001924500.1 | brown         | 63.34219 | 25.2329 | 0.646344 | 0.238619 | 14.48   |
| gi 194041007 ref XM_001926441.1 | blue          | 800.8697 | 199.834 | 0.936827 | 0.018879 | 52.68   |
| gi 194041034 ref XM_001928236.1 | turquoise     | 677.5878 | 173.198 | 0.866919 | 0.057101 | 16.592  |
| gi 194041080 ref XM_001924608.1 | lightcyan     | 176.252  | 12.8935 | 0.505488 | 0.384962 | 6.702   |
| gi 194041087 ref XM_001927225.1 | magenta       | 270.1832 | 79.5407 | 0.992624 | 0.00076  | 61.502  |
| gi 194041154 ref XM_001925630.1 | turquoise     | 429.4907 | 126.146 | 0.762698 | 0.133718 | 11.542  |
| gi 194041236 ref XM_001928454.1 | violet        | 984.8514 | 74.9802 | 0.998573 | 6.47E-05 | 69.484  |
| gi 194041241 ref XM_001928861.1 | grey60        | 958.5502 | 61.9787 | 0.99397  | 0.000562 | 565.862 |
| gi 194041305 ref XM_001927960.1 | salmon        | 158.7493 | 37.8016 | 0.91942  | 0.027124 | 38.372  |

|                                 |               |          |         |          |          |         |
|---------------------------------|---------------|----------|---------|----------|----------|---------|
| gi 194041319 ref XM_001928397.1 | turquoise     | 416.9031 | 139.165 | 0.79087  | 0.111133 | 7.71    |
| gi 194041329 ref XM_001928735.1 | blue          | 651.3239 | 197.569 | 0.932597 | 0.020793 | 6.192   |
| gi 194041338 ref XM_001928892.1 | turquoise     | 396.8931 | 125.754 | 0.75629  | 0.139025 | 5.562   |
| gi 194041353 ref XM_001926876.1 | red           | 489.4108 | 107.95  | 0.994444 | 0.000497 | 4.638   |
| gi 194041357 ref XM_001926917.1 | brown         | 183.7713 | 45.3087 | 0.68129  | 0.205348 | 22.454  |
| gi 194041366 ref XM_001924481.1 | turquoise     | 623.4241 | 153.998 | 0.833011 | 0.079832 | 23.126  |
| gi 194041368 ref XM_001924555.1 | tan           | 920.5469 | 67.8438 | 0.995228 | 0.000395 | 30.428  |
| gi 194041393 ref XM_001928536.1 | turquoise     | 926.899  | 257.341 | 0.976226 | 0.004385 | 37.074  |
| gi 194041450 ref XM_001928163.1 | salmon        | 140.8313 | 32.9762 | 0.886578 | 0.045066 | 45.974  |
| gi 194041518 ref XM_001927414.1 | darkorange    | 184.5846 | 17.688  | 0.923977 | 0.024873 | 45.9    |
| gi 194041588 ref XM_001927189.1 | white         | 190.169  | 26.1202 | 0.809165 | 0.097159 | 8.658   |
| gi 194041596 ref XM_001927803.1 | blue          | 838.0416 | 193.992 | 0.926873 | 0.023476 | 7.5     |
| gi 194041636 ref XM_001929009.1 | blue          | 699.2441 | 210.185 | 0.945865 | 0.014997 | 58.392  |
| gi 194041732 ref XM_001927648.1 | blue          | 841.0428 | 236.39  | 0.974503 | 0.004868 | 13.49   |
| gi 194041758 ref XM_001924615.1 | orange        | 352.623  | 33.2251 | 0.980918 | 0.003155 | 23.942  |
| gi 194041760 ref XM_001924661.1 | skyblue       | 259.7392 | 30.3594 | 0.982862 | 0.002686 | 3.762   |
| gi 194041762 ref XM_001927529.1 | turquoise     | 345.5294 | 101.321 | 0.691839 | 0.195583 | 7.79    |
| gi 194041780 ref XM_001925192.1 | turquoise     | 415.3426 | 100.903 | 0.691268 | 0.196108 | 66.71   |
| gi 194041796 ref XM_001928803.1 | turquoise     | 904.6587 | 256.216 | 0.971795 | 0.005662 | 11.568  |
| gi 194041820 ref XM_001929110.1 | grey60        | 968.3563 | 61.1952 | 0.991464 | 0.000946 | 11.394  |
| gi 194041839 ref XM_001929344.1 | royalblue     | 269.3096 | 18.0018 | 0.814107 | 0.093483 | 13.434  |
| gi 194041859 ref XM_001924277.1 | greenyellow   | 223.7478 | 44.9288 | 0.942613 | 0.01636  | 10.59   |
| gi 194041878 ref XM_001924973.1 | green         | 122.4704 | 60.4092 | 0.990826 | 0.001053 | 52.008  |
| gi 194041914 ref XM_001928393.1 | turquoise     | 524.5656 | 173.662 | 0.85884  | 0.062299 | 48.172  |
| gi 194041916 ref XM_001925662.1 | violet        | 951.5732 | 74.0329 | 0.996043 | 0.000299 | 7.552   |
| gi 194041932 ref XM_001928812.1 | purple        | 173.1183 | 16.9088 | 0.734907 | 0.157166 | 40.218  |
| gi 194041960 ref XM_001929335.1 | red           | 593.2961 | 101.317 | 0.979378 | 0.003544 | 15.932  |
| gi 194041962 ref XM_001926774.1 | tan           | 922.3998 | 64.0569 | 0.982979 | 0.002659 | 8.576   |
| gi 194042016 ref XM_001926579.1 | white         | 183.9357 | 25.7207 | 0.848011 | 0.069485 | 45.216  |
| gi 194042046 ref XM_001928978.1 | red           | 479.7531 | 96.167  | 0.96854  | 0.006667 | 12.256  |
| gi 194042125 ref XM_001928342.1 | white         | 892.3154 | 29.4021 | 0.853653 | 0.065711 | 197.586 |
| gi 194042129 ref XM_001927395.1 | darkmagenta   | 909.6708 | 25.835  | 0.985003 | 0.0022   | 14.356  |
| gi 194042141 ref XM_001929000.1 | turquoise     | 429.7612 | 127.836 | 0.75037  | 0.143982 | 151.022 |
| gi 194042170 ref XM_001929360.1 | blue          | 873.9237 | 199.919 | 0.939795 | 0.017572 | 8.34    |
| gi 194042188 ref XM_001924178.1 | turquoise     | 714.2627 | 225.462 | 0.93865  | 0.018072 | 41.554  |
| gi 194042190 ref XM_001924717.1 | turquoise     | 825.1207 | 254.732 | 0.951343 | 0.01279  | 20.384  |
| gi 194042230 ref XM_001927832.1 | turquoise     | 296.3964 | 61.8577 | 0.570179 | 0.315546 | 24.682  |
| gi 194042273 ref XM_001927415.1 | darkturquoise | 167.4626 | 30.5483 | 0.964758 | 0.0079   | 23.87   |
| gi 194042287 ref XM_001927955.1 | blue          | 896.3825 | 234.526 | 0.970052 | 0.006193 | 93.886  |
| gi 194042295 ref XM_001928522.1 | turquoise     | 343.609  | 83.9484 | 0.624236 | 0.260356 | 36.238  |
| gi 194042303 ref XM_001928772.1 | blue          | 722.8391 | 189.505 | 0.923843 | 0.024939 | 112.468 |
| gi 194042305 ref XM_001928810.1 | yellow        | 190.1313 | 63.5969 | 0.844018 | 0.072196 | 62.02   |
| gi 194042311 ref XM_001925999.1 | turquoise     | 527.4287 | 126.354 | 0.7799   | 0.119778 | 21.496  |
| gi 194042329 ref XM_001929115.1 | black         | 977.2427 | 99.2511 | 0.999349 | 1.99E-05 | 6.576   |
| gi 194042367 ref XM_001926555.1 | black         | 970.4379 | 98.5502 | 0.997732 | 0.00013  | 46.264  |
| gi 194042373 ref XM_001925458.1 | yellow        | 220.4879 | 78.1894 | 0.896281 | 0.039468 | 11.252  |
| gi 194042394 ref XM_001927941.1 | blue          | 873.8608 | 241.322 | 0.9778   | 0.003957 | 6.212   |
| gi 194042396 ref XM_001927868.1 | blue          | 755.6306 | 178.742 | 0.91117  | 0.031355 | 4.888   |

|                                 |               |          |         |          |          |         |
|---------------------------------|---------------|----------|---------|----------|----------|---------|
| gi 194042438 ref XM_001927977.1 | turquoise     | 813.1318 | 254.339 | 0.954169 | 0.011697 | 33.974  |
| gi 194042457 ref XM_001928703.1 | brown         | 118.5334 | 44.5793 | 0.832409 | 0.080256 | 6.372   |
| gi 194042459 ref XM_001928724.1 | magenta       | 241.0392 | 76.3599 | 0.984178 | 0.002383 | 21.684  |
| gi 194042469 ref XM_001928931.1 | darkgreen     | 243.4491 | 18.9813 | 0.786131 | 0.114844 | 2.26    |
| gi 194042472 ref XM_001924771.1 | turquoise     | 403.393  | 116.469 | 0.726971 | 0.164062 | 26.762  |
| gi 194042477 ref XM_001926521.1 | salmon        | 222.9539 | 38.8809 | 0.922442 | 0.025625 | 69.588  |
| gi 194042479 ref XM_001926556.1 | paleturquoise | 155.0515 | 14.3636 | 0.869321 | 0.055583 | 5.792   |
| gi 194042490 ref XM_001925381.1 | yellow        | 256.158  | 85.2467 | 0.923328 | 0.02519  | 69.2    |
| gi 194042528 ref XM_001927272.1 | darkmagenta   | 987.5245 | 26.6954 | 0.991376 | 0.00096  | 978.536 |
| gi 194042562 ref XM_001925435.1 | brown         | 197.5553 | 47.1374 | 0.7164   | 0.173379 | 10.732  |
| gi 194042583 ref XM_001928329.1 | pink          | 127.5384 | 10.1107 | -0.1658  | 0.789863 | 21.624  |
| gi 194042598 ref XM_001924401.1 | yellow        | 159.4008 | 40.3849 | 0.732339 | 0.159388 | 38.666  |
| gi 194042624 ref XM_001927934.1 | blue          | 842.7471 | 230.544 | 0.968302 | 0.006742 | 10.538  |
| gi 194042632 ref XM_001928164.1 | grey60        | 950.4739 | 63.05   | 0.997423 | 0.000157 | 8.012   |
| gi 194042649 ref XM_001928781.1 | turquoise     | 507.6462 | 149.455 | 0.805015 | 0.100278 | 19.852  |
| gi 194042680 ref XM_001929224.1 | lightcyan     | 256.445  | 31.8821 | 0.909736 | 0.03211  | 9.758   |
| gi 194042688 ref XM_001929282.1 | violet        | 851.5443 | 70.4304 | 0.985856 | 0.002015 | 14.528  |
| gi 194042690 ref XM_001929322.1 | royalblue     | 279.2881 | 26.1155 | 0.941189 | 0.016969 | 61.568  |
| gi 194042702 ref XM_001925079.1 | grey60        | 947.8703 | 63.2624 | 0.998158 | 9.49E-05 | 12.518  |
| gi 194042725 ref XM_001925659.1 | yellow        | 232.3145 | 74.7166 | 0.8915   | 0.042197 | 7.464   |
| gi 194042749 ref XM_001925080.1 | turquoise     | 388.1671 | 106.85  | 0.704715 | 0.183847 | 143.644 |
| gi 194042783 ref XM_001924319.1 | paleturquoise | 201.3674 | 19.4315 | 0.957584 | 0.010419 | 5.042   |
| gi 194042787 ref XM_001924736.1 | purple        | 96.47347 | 22.2132 | 0.919684 | 0.026992 | 49.33   |
| gi 194042789 ref XM_001925275.1 | red           | 450.1993 | 101.938 | 0.981368 | 0.003044 | 54.314  |
| gi 194042801 ref XM_001927517.1 | blue          | 831.2691 | 240.192 | 0.979459 | 0.003523 | 36.676  |
| gi 194042805 ref XM_001927802.1 | skyblue       | 252.9134 | 31.9141 | 0.992973 | 0.000706 | 191.054 |
| gi 194042811 ref XM_001925327.1 | greenyellow   | 157.1301 | 37.3605 | 0.903762 | 0.035317 | 223.288 |
| gi 194042813 ref XM_001928193.1 | turquoise     | 508.6148 | 119.295 | 0.749394 | 0.144805 | 20.924  |
| gi 194042821 ref XM_001928374.1 | darkmagenta   | 985.7587 | 25.4987 | 0.982161 | 0.002853 | 27.514  |
| gi 194042829 ref XM_001928949.1 | blue          | 822.941  | 243.681 | 0.981371 | 0.003044 | 10.464  |
| gi 194042833 ref XM_001929033.1 | purple        | 50.52592 | 13.357  | 0.67646  | 0.209863 | 31.898  |
| gi 194042835 ref XM_001929055.1 | turquoise     | 577.3997 | 148.794 | 0.812747 | 0.09449  | 10.296  |
| gi 194042841 ref XM_001929155.1 | black         | 988.2076 | 97.1497 | 0.994595 | 0.000477 | 9.058   |
| gi 194042857 ref XM_001927712.1 | turquoise     | 354.5181 | 87.1032 | 0.639415 | 0.245377 | 41.764  |
| gi 194042859 ref XM_001927602.1 | lightyellow   | 956.4324 | 63.0856 | 0.998575 | 6.46E-05 | 22.242  |
| gi 194042865 ref XM_001925507.1 | blue          | 713.8232 | 217.516 | 0.954101 | 0.011723 | 13.848  |
| gi 194042903 ref XM_001928981.1 | greenyellow   | 161.2911 | 42.2002 | 0.931141 | 0.021465 | 46.526  |
| gi 194042939 ref XM_001929407.1 | skyblue       | 191.6508 | 28.9689 | 0.971433 | 0.005771 | 7.474   |
| gi 194042943 ref XM_001929420.1 | turquoise     | 783.7875 | 241.402 | 0.960376 | 0.009412 | 14.136  |
| gi 194042960 ref XM_001929554.1 | turquoise     | 802.0518 | 247.912 | 0.947847 | 0.014185 | 13.284  |
| gi 194042969 ref XM_001929585.1 | salmon        | 289.1923 | 39.544  | 0.924773 | 0.024487 | 338.674 |
| gi 194043008 ref XM_001928156.1 | lightyellow   | 996.7851 | 61.6339 | 0.993773 | 0.000589 | 6.44    |
| gi 194043036 ref XM_001924558.1 | grey60        | 920.2537 | 61.4789 | 0.992329 | 0.000806 | 8.584   |
| gi 194043042 ref XM_001926896.1 | lightcyan     | 259.616  | 36.294  | 0.935772 | 0.01935  | 18.256  |
| gi 194043052 ref XM_001927455.1 | tan           | 827.6358 | 64.471  | 0.985001 | 0.0022   | 21.452  |
| gi 194043063 ref XM_001925272.1 | tan           | 907.0298 | 66.0685 | 0.989515 | 0.001287 | 17.712  |
| gi 194043066 ref XM_001928232.1 | turquoise     | 886.0328 | 265.453 | 0.976618 | 0.004277 | 60.734  |
| gi 194043070 ref XM_001928504.1 | red           | 637.6222 | 93.9335 | 0.963267 | 0.008405 | 6.454   |

|                                 |             |          |         |          |          |          |
|---------------------------------|-------------|----------|---------|----------|----------|----------|
| gi 194043072 ref XM_001925326.1 | blue        | 726.6863 | 212.673 | 0.949064 | 0.013694 | 6.462    |
| gi 194043074 ref XM_001928487.1 | turquoise   | 382.3837 | 106.733 | 0.70304  | 0.185362 | 31.638   |
| gi 194043076 ref XM_001925356.1 | grey60      | 960.6564 | 60.4508 | 0.988865 | 0.001408 | 44.912   |
| gi 194043112 ref XM_001929270.1 | black       | 989.9807 | 98.7966 | 0.998299 | 8.42E-05 | 57.244   |
| gi 194043122 ref XM_001929345.1 | blue        | 832.1692 | 210.799 | 0.948716 | 0.013834 | 18.068   |
| gi 194043175 ref XM_001928565.1 | violet      | 944.9502 | 72.9071 | 0.993022 | 0.000699 | 3.78     |
| gi 194043187 ref XM_001925978.1 | turquoise   | 890.0419 | 263.556 | 0.971659 | 0.005703 | 26.572   |
| gi 194043225 ref XM_001929262.1 | royalblue   | 346.1074 | 32.7974 | 0.993786 | 0.000587 | 8.604    |
| gi 194043233 ref XM_001929306.1 | tan         | 925.8686 | 65.864  | 0.988472 | 0.001483 | 21.116   |
| gi 194043243 ref XM_001924074.1 | lightcyan   | 287.4385 | 40.248  | 0.977869 | 0.003939 | 60.576   |
| gi 194043277 ref XM_001927490.1 | turquoise   | 645.1845 | 162.377 | 0.847142 | 0.070073 | 10.028   |
| gi 194043291 ref XM_001928076.1 | black       | 991.7848 | 97.8503 | 0.99624  | 0.000277 | 44.674   |
| gi 194043329 ref XM_001929273.1 | red         | 669.417  | 100.972 | 0.979248 | 0.003577 | 31.996   |
| gi 194043337 ref XM_001926296.1 | black       | 919.1308 | 95.6936 | 0.992212 | 0.000824 | 6.556    |
| gi 194043361 ref XM_001929445.1 | turquoise   | 824.8591 | 243.332 | 0.94412  | 0.015723 | 3.158    |
| gi 194043363 ref XM_001929468.1 | purple      | 123.5499 | 19.3605 | 0.90817  | 0.032941 | 139.532  |
| gi 194043378 ref XM_001929539.1 | black       | 958.6912 | 93.6756 | 0.987054 | 0.001765 | 6.796    |
| gi 194043405 ref XM_001929590.1 | red         | 371.7348 | 70.8624 | 0.904606 | 0.034858 | 7.736    |
| gi 194043439 ref XM_001927481.1 | pink        | 136.6307 | 2.8397  | -0.97092 | 0.005926 | 10.342   |
| gi 194043453 ref XM_001927547.1 | darkgrey    | 156.9591 | 26.6009 | 0.926079 | 0.023857 | 12.668   |
| gi 194043490 ref XM_001927785.1 | tan         | 942.3017 | 67.8939 | 0.995096 | 0.000412 | 15.608   |
| gi 194043531 ref XM_001926134.1 | blue        | 534.6487 | 142.314 | 0.859012 | 0.062187 | 9.82     |
| gi 194043583 ref XM_001928616.1 | turquoise   | 778.9763 | 250.001 | 0.943613 | 0.015936 | 2.476    |
| gi 194043591 ref XM_001927268.1 | turquoise   | 538.9652 | 157.207 | 0.822561 | 0.087296 | 31.408   |
| gi 194043669 ref XM_001924741.1 | turquoise   | 267.6497 | 63.06   | 0.529852 | 0.358422 | 53.128   |
| gi 194043695 ref XM_001925613.1 | white       | 190.493  | 20.8344 | 0.750724 | 0.143684 | 3.296    |
| gi 194043731 ref XM_001926974.1 | darkgreen   | 274.6459 | 34.1932 | 0.969588 | 0.006337 | 23.07    |
| gi 194043848 ref XM_001928131.1 | blue        | 853.0621 | 246.804 | 0.98338  | 0.002566 | 13.4     |
| gi 194043858 ref XM_001928335.1 | blue        | 772.2354 | 219.861 | 0.953255 | 0.012047 | 56.898   |
| gi 194043900 ref XM_001924998.1 | black       | 982.4577 | 98.2856 | 0.99723  | 0.000175 | 53.948   |
| gi 194043908 ref XM_001927890.1 | turquoise   | 857.4694 | 261.72  | 0.975835 | 0.004493 | 11.026   |
| gi 194043935 ref XM_001924322.1 | navy        | 132.9441 | 39.397  | 0.930416 | 0.021803 | 4.448    |
| gi 194043951 ref XM_001927705.1 | green       | 100.9303 | 20.7898 | 0.64656  | 0.23841  | 8.284    |
| gi 194043957 ref XM_001925803.1 | green       | 81.14182 | 41.5064 | 0.875689 | 0.051621 | 3212.444 |
| gi 194043959 ref XM_001927448.1 | navy        | 167.8973 | 9.72082 | -0.40059 | 0.503945 | 8.722    |
| gi 194043976 ref XM_001928406.1 | darkred     | 245.5342 | 34.8353 | 0.941779 | 0.016716 | 10.126   |
| gi 194044012 ref XM_001927891.1 | tan         | 952.0768 | 60.6785 | 0.97     | 0.006209 | 14.838   |
| gi 194044032 ref XM_001928774.1 | purple      | 194.8504 | 16.2933 | -0.87084 | 0.054629 | 29.68    |
| gi 194044034 ref XM_001928794.1 | blue        | 760.2529 | 200.109 | 0.937584 | 0.018543 | 166.268  |
| gi 194044044 ref XM_001927332.1 | magenta     | 207.8089 | 64.0088 | 0.943352 | 0.016047 | 3.6      |
| gi 194044110 ref XM_001924775.1 | lightyellow | 1002.379 | 61.1783 | 0.992245 | 0.000819 | 33.352   |
| gi 194044123 ref XM_001926788.1 | blue        | 641.3066 | 136.159 | 0.846948 | 0.070204 | 33.102   |
| gi 194044132 ref XM_001927798.1 | turquoise   | 633.5899 | 179.746 | 0.867342 | 0.056833 | 15.506   |
| gi 194044163 ref XM_001924534.1 | blue        | 891.9267 | 230.584 | 0.966801 | 0.007225 | 39.624   |
| gi 194044169 ref XM_001924460.1 | grey60      | 961.2813 | 60.7951 | 0.990023 | 0.001195 | 50.348   |
| gi 194044196 ref XM_001928527.1 | royalblue   | 380.4747 | 33.3921 | 0.999152 | 2.96E-05 | 11.908   |
| gi 194044237 ref XM_001927396.1 | blue        | 842.2083 | 237.582 | 0.977122 | 0.00414  | 16.326   |
| gi 194044271 ref XM_001926068.1 | blue        | 842.8416 | 226.276 | 0.96041  | 0.0094   | 8.634    |

|                                 |              |          |         |          |          |          |
|---------------------------------|--------------|----------|---------|----------|----------|----------|
| gi 194044273 ref XM_001926112.1 | sienna3      | 999.721  | 24.4937 | 0.987146 | 0.001746 | 8.882    |
| gi 194044289 ref XM_001926487.1 | turquoise    | 404.7086 | 82.6403 | 0.68264  | 0.20409  | 48.786   |
| gi 194044331 ref XM_001925019.1 | skyblue      | 95.05129 | 15.9067 | 0.835781 | 0.077888 | 1.84     |
| gi 194044358 ref XM_001928282.1 | turquoise    | 287.5246 | 95.7714 | 0.680425 | 0.206154 | 9.332    |
| gi 194044362 ref XM_001926993.1 | green        | 163.7569 | 21.9742 | 0.398776 | 0.50606  | 35.826   |
| gi 194044424 ref XM_001927947.1 | blue         | 836.299  | 237.355 | 0.974008 | 0.005011 | 2.436    |
| gi 194044465 ref XM_001928874.1 | midnightblue | 149.7997 | 43.7693 | 0.974871 | 0.004764 | 64.556   |
| gi 194044483 ref XM_001929150.1 | blue         | 728.9637 | 215.742 | 0.952201 | 0.012455 | 190.524  |
| gi 194044504 ref XM_001927363.1 | salmon       | 250.4465 | 48.9753 | 0.981041 | 0.003125 | 55.2     |
| gi 194044550 ref XM_001927682.1 | purple       | 78.79043 | 15.4323 | 0.676809 | 0.209536 | 114.436  |
| gi 194044572 ref XM_001925488.1 | brown        | 189.2836 | 41.1195 | 0.693676 | 0.193895 | 7.9      |
| gi 194044576 ref XM_001925640.1 | blue         | 908.2581 | 192.514 | 0.931672 | 0.021219 | 33.982   |
| gi 194044593 ref XM_001929063.1 | turquoise    | 780.3005 | 243.742 | 0.933052 | 0.020584 | 50.344   |
| gi 194044597 ref XM_001926862.1 | yellow       | 260.5975 | 88.8514 | 0.924336 | 0.024699 | 16.372   |
| gi 194044682 ref XM_001928813.1 | grey         | 213.625  | 11.4598 | 0.969228 | 0.00645  | 8.582    |
| gi 194044686 ref XM_001928889.1 | lightyellow  | 997.0074 | 62.4372 | 0.996396 | 0.00026  | 9.51     |
| gi 194044738 ref XM_001929453.1 | grey60       | 872.2639 | 60.1701 | 0.987938 | 0.001587 | 1.918    |
| gi 194044782 ref XM_001926654.1 | darkorange   | 152.1306 | 15.7878 | 0.894004 | 0.04076  | 42.056   |
| gi 194044788 ref XM_001928382.1 | darkred      | 256.3642 | 38.2442 | 0.964722 | 0.007912 | 7.778    |
| gi 194044819 ref XM_001926406.1 | grey60       | 977.7696 | 61.0754 | 0.990856 | 0.001048 | 34.47    |
| gi 194044859 ref XM_001927209.1 | lightcyan    | 245.0994 | 37.8053 | 0.941225 | 0.016953 | 17.282   |
| gi 194044861 ref XM_001927107.1 | lightyellow  | 999.8494 | 61.7927 | 0.994304 | 0.000516 | 5.538    |
| gi 194044921 ref XM_001927440.1 | black        | 993.3183 | 96.2039 | 0.992598 | 0.000764 | 15.008   |
| gi 194044929 ref XM_001925991.1 | darkred      | 231.1659 | 42.7034 | 0.982428 | 0.002789 | 6.364    |
| gi 194044943 ref XM_001926010.1 | black        | 964.6182 | 97.3443 | 0.994998 | 0.000424 | 2.638    |
| gi 194044951 ref XM_001925471.1 | darkmagenta  | 947.4995 | 26.6688 | 0.991577 | 0.000927 | 5.252    |
| gi 194045002 ref XM_001926288.1 | darkorange   | 152.3919 | 22.0577 | 0.972187 | 0.005545 | 166.37   |
| gi 194045026 ref XM_001925965.1 | red          | 517.9008 | 110.213 | 0.998648 | 5.97E-05 | 11.792   |
| gi 194045094 ref XM_001925372.1 | darkgrey     | 222.752  | 29.1674 | 0.955847 | 0.011063 | 7.96     |
| gi 194045111 ref XM_001927898.1 | navy         | 192.3158 | 29.9102 | 0.913466 | 0.030157 | 43.372   |
| gi 194271212 gb EU714326.1      | yellow       | 288.5661 | 109.398 | 0.977099 | 0.004146 | 4.572    |
| gi 194332486 ref NM_001130213.1 | darkgreen    | 251.4127 | 35.2711 | 0.976221 | 0.004386 | 41.528   |
| gi 194474047 ref NM_001130535.1 | salmon       | 214.2672 | 35.5444 | 0.903035 | 0.035714 | 68.006   |
| gi 194474049 ref NM_001130531.1 | lightgreen   | 303.4882 | 56.2589 | 0.981862 | 0.002924 | 3.26     |
| gi 195539469 ref NM_001130733.1 | salmon       | 155.9444 | 37.5662 | 0.914135 | 0.029812 | 143.066  |
| gi 195539471 ref NM_001130734.1 | blue         | 790.0937 | 226.795 | 0.965915 | 0.007515 | 3.432    |
| gi 196259975 ref NM_001131045.1 | blue         | 863.1986 | 232.554 | 0.968224 | 0.006767 | 18.968   |
| gi 197717772 gb EF113595.2      | royalblue    | 239.4021 | 5.32912 | 0.314685 | 0.606046 | 67.372   |
| gi 198282078 ref NM_001134823.1 | purple       | 178.0886 | 17.8461 | -0.91114 | 0.03137  | 425.244  |
| gi 19919837 gb AF490841.1       | turquoise    | 298.1854 | 103.795 | 0.735561 | 0.156602 | 39.896   |
| gi 201066357 ref NM_001134968.1 | midnightblue | 105.1378 | 35.8919 | 0.944056 | 0.01575  | 2388.228 |
| gi 209863050 ref NM_001135960.1 | turquoise    | 838.2506 | 251.647 | 0.967126 | 0.00712  | 46.866   |
| gi 209954779 ref NM_214223.2    | grey60       | 916.1437 | 62.5069 | 0.995726 | 0.000335 | 4.636    |
| gi 211578395 ref NM_001136510.1 | pink         | 172.83   | 51.0933 | 0.9179   | 0.027889 | 38.566   |
| gi 212549664 ref NM_001137639.1 | turquoise    | 345.7278 | 114.549 | 0.690921 | 0.196426 | 42.598   |
| gi 213021240 ref NM_001139472.1 | greenyellow  | 226.1964 | 46.8029 | 0.95569  | 0.011122 | 8.698    |
| gi 217416473 ref NM_001142668.1 | violet       | 971.6987 | 73.481  | 0.994498 | 0.000489 | 11.774   |
| gi 217416475 ref NM_001142669.1 | yellowgreen  | 181.0771 | 15.2756 | 0.950778 | 0.013012 | 14.778   |

|                                    |              |          |         |          |          |         |
|------------------------------------|--------------|----------|---------|----------|----------|---------|
| gi 218082010 ref NM_001142666.1    | skyblue      | 168.8669 | 28.9843 | 0.973826 | 0.005063 | 19.042  |
| gi 2286009 emb AJ000786.1          | magenta      | 279.5705 | 73.6392 | 0.97462  | 0.004835 | 29.632  |
| gi 2286014 emb AJ000791.1          | darkgreen    | 230.6165 | 29.5264 | 0.948709 | 0.013837 | 76.328  |
| gi 27357069 gb AY166682.1          | skyblue      | 132.629  | 21.6289 | 0.908613 | 0.032705 | 6.524   |
| gi 29150628 gb AY216477.1          | lightyellow  | 976.5372 | 62.4749 | 0.996626 | 0.000235 | 42.086  |
| gi 33772282 gb AY346132.1 AY346133 | turquoise    | 718.4821 | 235.477 | 0.916244 | 0.028729 | 10.934  |
| gi 34582610 gb AY368623.1          | turquoise    | 415.3862 | 116.749 | 0.729241 | 0.162081 | 28.25   |
| gi 35384837 gb AY374470.1          | red          | 429.6961 | 104.559 | 0.98737  | 0.001701 | 49.288  |
| gi 37700454 gb AY421755.1          | grey60       | 918.7203 | 61.0011 | 0.990722 | 0.001071 | 3.3     |
| gi 4186150 emb AJ236938.1          | red          | 322.9202 | 73.65   | 0.909887 | 0.03203  | 32.97   |
| gi 45268992 gb AY550051.1          | yellowgreen  | 174.2023 | 18.4178 | 0.993376 | 0.000647 | 29.3    |
| gi 45758483 gb AY553927.1          | violet       | 985.2259 | 72.4136 | 0.99149  | 0.000941 | 10.132  |
| gi 47522609 ref NM_213938.1        | greenyellow  | 157.48   | 37.3421 | 0.900845 | 0.036918 | 106.94  |
| gi 47522617 ref NM_213934.1        | salmon       | 155.6562 | 45.4034 | 0.963403 | 0.008358 | 19.824  |
| gi 47522629 ref NM_213928.1        | darkred      | 241.5233 | 37.5321 | 0.958523 | 0.010077 | 62.138  |
| gi 47522635 ref NM_213927.1        | pink         | 307.0865 | 49.1221 | 0.862275 | 0.060072 | 113.03  |
| gi 47522641 ref NM_213922.1        | blue         | 858.5807 | 243.62  | 0.981229 | 0.003079 | 502.412 |
| gi 47522643 ref NM_213923.1        | red          | 656.2582 | 93.0536 | 0.96008  | 0.009517 | 14.528  |
| gi 47522659 ref NM_213914.1        | lightyellow  | 973.7402 | 63.426  | 0.999628 | 8.61E-06 | 6.474   |
| gi 47522661 ref NM_213911.1        | grey60       | 979.0561 | 58.6743 | 0.982617 | 0.002744 | 64.316  |
| gi 47522667 ref NM_213910.1        | lightyellow  | 969.2793 | 63.4091 | 0.999574 | 1.06E-05 | 3.268   |
| gi 47522679 ref NM_213904.1        | black        | 691.8101 | 67.4442 | 0.921995 | 0.025844 | 13.828  |
| gi 47522681 ref NM_213901.1        | brown        | 198.1965 | 61.4316 | 0.949989 | 0.013324 | 4.71    |
| gi 47522685 ref NM_213898.1        | magenta      | 259.2915 | 77.1994 | 0.985861 | 0.002014 | 92.02   |
| gi 47522689 ref NM_213896.1        | red          | 460.8479 | 98.1623 | 0.97281  | 0.00536  | 27.86   |
| gi 47522691 ref NM_213897.1        | lightcyan    | 272.5725 | 40.8258 | 0.959605 | 0.009687 | 109.84  |
| gi 47522703 ref NM_213891.1        | blue         | 889.6683 | 207.619 | 0.944161 | 0.015706 | 24.33   |
| gi 47522711 ref NM_213943.1        | violet       | 950.2477 | 74.3936 | 0.997007 | 0.000196 | 9.858   |
| gi 47522717 ref NM_213944.1        | blue         | 868.978  | 251.877 | 0.988109 | 0.001554 | 46.866  |
| gi 47522719 ref NM_213945.1        | skyblue      | 158.216  | 28.8139 | 0.973236 | 0.005235 | 16.65   |
| gi 47522737 ref NM_213954.1        | royalblue    | 296.0838 | 22.9165 | 0.890485 | 0.042784 | 207.622 |
| gi 47522751 ref NM_213961.1        | yellow       | 295.475  | 104.059 | 0.96513  | 0.007775 | 7.14    |
| gi 47522753 ref NM_213962.1        | turquoise    | 912.6313 | 271.821 | 0.988046 | 0.001566 | 152.43  |
| gi 47522763 ref NM_213968.1        | turquoise    | 290.0197 | 88.8882 | 0.63031  | 0.254334 | 48.716  |
| gi 47522769 ref NM_213971.1        | navy         | 142.632  | 44.8594 | 0.975718 | 0.004526 | 103.77  |
| gi 47522773 ref NM_213973.1        | salmon       | 246.2019 | 39.3864 | 0.92651  | 0.02365  | 10.336  |
| gi 47522777 ref NM_213976.1        | blue         | 804.8902 | 226.904 | 0.963267 | 0.008405 | 6.586   |
| gi 47522779 ref NM_213977.1        | midnightblue | 152.3716 | 47.1006 | 0.998613 | 6.20E-05 | 38.68   |
| gi 47522785 ref NM_213980.1        | turquoise    | 860.6042 | 239.546 | 0.951411 | 0.012763 | 102.502 |
| gi 47522789 ref NM_213982.1        | yellow       | 230.7524 | 71.4897 | 0.885157 | 0.045905 | 17.114  |
| gi 47522791 ref NM_213983.1        | blue         | 695.7425 | 202.67  | 0.933743 | 0.020268 | 149.802 |
| gi 47522821 ref NM_213998.1        | royalblue    | 69.91508 | 2.26778 | 0.157088 | 0.800815 | 10.888  |
| gi 47522837 ref NM_214006.1        | navy         | 130.8214 | 37.2169 | 0.902655 | 0.035922 | 44.026  |
| gi 47522843 ref NM_214009.1        | navy         | 119.5856 | 39.1236 | 0.912544 | 0.030636 | 7.56    |
| gi 47522861 ref NM_214020.1        | midnightblue | 137.3326 | 45.7827 | 0.991113 | 0.001004 | 59.824  |
| gi 47522869 ref NM_214024.1        | tan          | 888.355  | 67.5202 | 0.994681 | 0.000465 | 48.738  |
| gi 47522881 ref NM_214031.1        | white        | 150.6487 | 7.25178 | 0.296108 | 0.628568 | 10.226  |
| gi 47522897 ref NM_214039.1        | pink         | 265.0102 | 75.1512 | 0.995949 | 0.000309 | 105.058 |



|                             |               |          |         |          |          |         |
|-----------------------------|---------------|----------|---------|----------|----------|---------|
| gi 47522913 ref NM_214049.1 | red           | 441.0161 | 103.799 | 0.985737 | 0.00204  | 15.944  |
| gi 47522915 ref NM_214050.1 | grey          | 318.1352 | 12.5089 | 0.957086 | 0.010603 | 10.21   |
| gi 47522935 ref NM_214060.1 | lightcyan     | 229.1807 | 33.3894 | 0.906745 | 0.033703 | 52.474  |
| gi 47522937 ref NM_214061.1 | brown         | 100.704  | 42.9441 | 0.796477 | 0.10679  | 6.444   |
| gi 47522939 ref NM_214062.1 | yellow        | 256.8122 | 89.8558 | 0.936045 | 0.019228 | 107.352 |
| gi 47522941 ref NM_214063.1 | darkmagenta   | 982.0127 | 26.5739 | 0.990787 | 0.00106  | 9.066   |
| gi 47522943 ref NM_214064.1 | tan           | 918.3418 | 68.0149 | 0.99585  | 0.000321 | 21.516  |
| gi 47522957 ref NM_214072.1 | paleturquoise | 179.3318 | 19.7411 | 0.965027 | 0.00781  | 41.01   |
| gi 47522967 ref NM_214077.1 | greenyellow   | 212.127  | 51.2678 | 0.977285 | 0.004095 | 5.586   |
| gi 47523015 ref NM_214103.1 | grey          | 340.197  | 12.132  | 0.977487 | 0.004041 | 65.36   |
| gi 47523035 ref NM_214114.1 | sienna3       | 967.0406 | 26.0435 | 0.999415 | 1.70E-05 | 87.804  |
| gi 47523037 ref NM_214115.1 | tan           | 962.2402 | 68.8345 | 0.998501 | 6.97E-05 | 63.158  |
| gi 47523039 ref NM_214116.1 | magenta       | 260.2851 | 78.5532 | 0.988854 | 0.00141  | 197.894 |
| gi 47523059 ref NM_214128.1 | greenyellow   | 205.5721 | 49.5207 | 0.974196 | 0.004956 | 8.506   |
| gi 47523085 ref NM_214144.1 | brown         | 95.40206 | 36.4439 | 0.737924 | 0.154568 | 27.1    |
| gi 47523093 ref NM_213884.1 | brown         | 191.0893 | 56.4493 | 0.812908 | 0.09437  | 5.174   |
| gi 47523105 ref NM_213878.1 | darkturquoise | 164.3339 | 31.7846 | 0.973947 | 0.005028 | 27.654  |
| gi 47523121 ref NM_213870.1 | pink          | 148.4186 | 45.2809 | 0.882002 | 0.047786 | 21.642  |
| gi 47523187 ref NM_213830.1 | skyblue       | 178.7451 | 30.1256 | 0.981908 | 0.002913 | 6.136   |
| gi 47523195 ref NM_213826.1 | brown         | 110.7788 | 42.6991 | 0.800581 | 0.103644 | 8.272   |
| gi 47523213 ref NM_213817.1 | pink          | 176.6726 | 40.3133 | 0.875397 | 0.051801 | 7.724   |
| gi 47523231 ref NM_213804.1 | brown         | 100.6947 | 41.2939 | 0.825678 | 0.085048 | 7.038   |
| gi 47523255 ref NM_213792.1 | black         | 920.2016 | 96.6982 | 0.994184 | 0.000532 | 12.212  |
| gi 47523261 ref NM_213791.1 | skyblue       | 323.2202 | 29.3378 | 0.970831 | 0.005954 | 4.27    |
| gi 47523273 ref NM_213785.1 | tan           | 908.8411 | 63.5084 | 0.980692 | 0.003211 | 4.328   |
| gi 47523281 ref NM_213781.1 | turquoise     | 388.0275 | 107.469 | 0.688448 | 0.198707 | 1.06    |
| gi 47523317 ref NM_213763.1 | turquoise     | 548.3794 | 140.116 | 0.785284 | 0.115511 | 18.966  |
| gi 47523403 ref NM_214157.1 | darkgreen     | 292.8041 | 36.3365 | 0.984348 | 0.002345 | 17.954  |
| gi 47523419 ref NM_214166.1 | royalblue     | 238.5871 | 3.38062 | 0.465864 | 0.429058 | 15.268  |
| gi 47523427 ref NM_214171.1 | yellowgreen   | 169.8363 | 16.6719 | 0.970661 | 0.006006 | 13.712  |
| gi 47523443 ref NM_214181.1 | brown         | 201.0806 | 61.9564 | 0.922623 | 0.025536 | 12.108  |
| gi 47523445 ref NM_214183.1 | yellow        | 247.5019 | 89.1614 | 0.929416 | 0.022271 | 20.27   |
| gi 47523457 ref NM_214189.1 | magenta       | 291.1335 | 54.8267 | 0.909367 | 0.032305 | 1.248   |
| gi 47523461 ref NM_214192.1 | turquoise     | 773.6177 | 230.328 | 0.927806 | 0.023032 | 86.254  |
| gi 47523463 ref NM_214188.1 | orange        | 207.1513 | 25.7231 | 0.921092 | 0.026291 | 12.904  |
| gi 47523471 ref NM_214193.1 | yellowgreen   | 165.9563 | 17.5488 | 0.9841   | 0.002401 | 26.932  |
| gi 47523477 ref NM_214200.1 | blue          | 879.5197 | 239.364 | 0.976893 | 0.004202 | 6.15    |
| gi 47523483 ref NM_214199.1 | midnightblue  | 147.8918 | 26.5829 | 0.84267  | 0.073118 | 108.73  |
| gi 47523487 ref NM_214201.1 | skyblue       | 382.6002 | 27.7014 | 0.957763 | 0.010354 | 100.962 |
| gi 47523491 ref NM_214204.1 | red           | 436.0511 | 105.77  | 0.989858 | 0.001224 | 313.884 |
| gi 47523501 ref NM_214213.1 | brown         | 165.8968 | 24.0989 | 0.441139 | 0.457114 | 41.286  |
| gi 47523511 ref NM_214214.1 | navy          | 135.9803 | 44.0243 | 0.96295  | 0.008513 | 25.448  |
| gi 47523543 ref NM_214230.1 | blue          | 825.0236 | 235.184 | 0.972378 | 0.005488 | 6.486   |
| gi 47523545 ref NM_214236.1 | midnightblue  | 79.58401 | 5.1242  | -0.09557 | 0.878505 | 182.828 |
| gi 47523553 ref NM_214240.1 | blue          | 722.2735 | 214.592 | 0.947771 | 0.014216 | 27.092  |
| gi 47523561 ref NM_214245.1 | darkred       | 287.9114 | 40.0185 | 0.974154 | 0.004969 | 17.326  |
| gi 47523569 ref NM_214249.1 | salmon        | 242.278  | 46.9752 | 0.971384 | 0.005786 | 12.332  |
| gi 47523597 ref NM_214266.1 | midnightblue  | 95.96035 | 37.1173 | 0.948966 | 0.013733 | 14.768  |

|                                |               |          |         |          |          |          |
|--------------------------------|---------------|----------|---------|----------|----------|----------|
| gi 47523665 ref NM_214304.1    | turquoise     | 324.5158 | 107.597 | 0.701867 | 0.186425 | 21.716   |
| gi 47523669 ref NM_214306.1    | violet        | 994.2246 | 70.5367 | 0.986109 | 0.001961 | 41.282   |
| gi 47523671 ref NM_214303.1    | brown         | 86.30895 | 37.3453 | 0.637807 | 0.246953 | 12.152   |
| gi 47523673 ref NM_214308.1    | turquoise     | 633.4107 | 194.567 | 0.906186 | 0.034004 | 11.414   |
| gi 47523679 ref NM_214307.1    | navy          | 192.0561 | 24.7913 | 0.706913 | 0.181864 | 24.846   |
| gi 47523681 ref NM_214312.1    | darkgreen     | 181.7563 | 27.989  | 0.892729 | 0.04149  | 13.28    |
| gi 47523691 ref NM_214313.1    | turquoise     | 892.0626 | 269.317 | 0.984846 | 0.002234 | 15.852   |
| gi 47523695 ref NM_214315.1    | blue          | 909.9456 | 206.286 | 0.944352 | 0.015626 | 2.16     |
| gi 47523697 ref NM_214320.1    | lightyellow   | 922.4254 | 62.6339 | 0.997104 | 0.000187 | 8.312    |
| gi 47523711 ref NM_214323.1    | royalblue     | 179.8411 | 7.34443 | 0.399789 | 0.504877 | 4.866    |
| gi 47523719 ref NM_214330.1    | midnightblue  | 144.1248 | 44.0428 | 0.977444 | 0.004053 | 553.788  |
| gi 47523721 ref NM_214331.1    | pink          | 284.5083 | 69.4515 | 0.958397 | 0.010122 | 100.006  |
| gi 47523723 ref NM_214332.1    | lightcyan     | 287.5807 | 40.4153 | 0.981249 | 0.003074 | 228.042  |
| gi 47523725 ref NM_214333.1    | skyblue       | 465.348  | 22.9546 | 0.913831 | 0.029968 | 51.702   |
| gi 47523737 ref NM_214339.1    | violet        | 976.935  | 75.113  | 0.99894  | 4.14E-05 | 74.434   |
| gi 47523743 ref NM_214342.1    | orange        | 402.558  | 32.0815 | 0.97294  | 0.005322 | 13.848   |
| gi 47523769 ref NM_214356.1    | darkgrey      | 183.5637 | 34.9147 | 0.997355 | 0.000163 | 44.036   |
| gi 47523779 ref NM_214361.1    | lightyellow   | 1002.148 | 60.8655 | 0.991233 | 0.000984 | 117.71   |
| gi 47523785 ref NM_214364.1    | greenyellow   | 150.4091 | 44.9094 | 0.948375 | 0.013971 | 27.422   |
| gi 47523789 ref NM_214366.1    | turquoise     | 747.6399 | 231.048 | 0.92425  | 0.024741 | 68.288   |
| gi 47523799 ref NM_214372.1    | darkturquoise | 184.6254 | 26.2453 | 0.923166 | 0.02527  | 60.614   |
| gi 47523805 ref NM_214375.1    | turquoise     | 448.8228 | 137.546 | 0.782901 | 0.117394 | 1293.842 |
| gi 47523817 ref NM_214381.1    | navy          | 95.75348 | 8.31924 | 0.281198 | 0.646743 | 61.996   |
| gi 47523835 ref NM_214391.1    | midnightblue  | 79.89097 | 5.46915 | -0.41129 | 0.491489 | 11.664   |
| gi 47523845 ref NM_214396.1    | pink          | 77.95613 | 12.3926 | 0.434348 | 0.464889 | 858.34   |
| gi 47523847 ref NM_214397.1    | violet        | 928.9604 | 73.7223 | 0.99519  | 0.0004   | 39.714   |
| gi 47523867 ref NM_214407.1    | grey          | 341.1913 | 9.86436 | 0.355569 | 0.557004 | 80.326   |
| gi 47523869 ref NM_214408.1    | grey          | 152.1965 | 14.1479 | -0.94649 | 0.01474  | 101.306  |
| gi 47523875 ref NM_214409.1    | purple        | 129.4139 | 20.7586 | 0.892519 | 0.041611 | 301.56   |
| gi 47523887 ref NM_214418.1    | sienna3       | 959.9743 | 26.018  | 0.999208 | 2.67E-05 | 36.814   |
| gi 47523931 ref NM_214440.1    | darkturquoise | 103.8717 | 20.4706 | 0.868483 | 0.056111 | 2.952    |
| gi 48374062 ref NM_001001535.1 | turquoise     | 305.2454 | 98.5389 | 0.670555 | 0.215421 | 5919.602 |
| gi 48374066 ref NM_001001537.1 | darkmagenta   | 831.1143 | 23.5826 | 0.967062 | 0.00714  | 5.638    |
| gi 48374070 ref NM_001001539.1 | magenta       | 209.5977 | 67.8855 | 0.957265 | 0.010537 | 63.718   |
| gi 48675942 ref NM_001001640.1 | tan           | 944.921  | 62.5345 | 0.976691 | 0.004257 | 9.332    |
| gi 48675944 ref NM_001001637.1 | grey          | 157.7645 | 13.8768 | -0.96656 | 0.007303 | 37.604   |
| gi 48675952 ref NM_001001643.1 | turquoise     | 440.7761 | 116.094 | 0.725275 | 0.165547 | 144.262  |
| gi 48675956 ref NM_001001645.1 | red           | 378.6933 | 95.1264 | 0.96655  | 0.007307 | 51.248   |
| gi 48976064 ref NM_001001649.2 | brown         | 159.9608 | 30.1572 | 0.611359 | 0.273249 | 107.638  |
| gi 48976128 ref NM_001001770.1 | navy          | 183.2969 | 31.6897 | 0.820908 | 0.088496 | 85.692   |
| gi 49274614 ref NM_001001860.1 | black         | 985.9291 | 94.9019 | 0.989799 | 0.001235 | 55.85    |
| gi 49274638 ref NM_001001861.1 | turquoise     | 685.929  | 226.136 | 0.898625 | 0.038152 | 0.81     |
| gi 50979302 ref NM_214301.1    | pink          | 208.8229 | 63.8846 | 0.970838 | 0.005952 | 111.372  |
| gi 51491905 ref NM_001003924.1 | navy          | 119.2558 | 39.5781 | 0.911479 | 0.031193 | 8.292    |
| gi 51592110 ref NM_001004031.1 | turquoise     | 894.5132 | 259.775 | 0.970251 | 0.006132 | 18.472   |
| gi 51592138 ref NM_001004045.1 | skyblue       | 232.1569 | 32.1944 | 0.995984 | 0.000305 | 11.934   |
| gi 52350674 gb AY609390.1      | green         | 81.03332 | 27.4774 | 0.700314 | 0.187835 | 15.188   |
| gi 52350683 gb AY609399.1      | turquoise     | 261.0683 | 76.144  | 0.603127 | 0.281577 | 27.512   |

|                           |              |          |         |          |          |         |
|---------------------------|--------------|----------|---------|----------|----------|---------|
| gi 52350685 gb AY609401.1 | pink         | 289.5833 | 55.9544 | 0.897461 | 0.038804 | 2.66    |
| gi 52350686 gb AY609402.1 | lightcyan    | 257.1036 | 38.6467 | 0.944599 | 0.015523 | 26.87   |
| gi 52350700 gb AY609415.1 | green        | 99.42512 | 57.8515 | 0.961978 | 0.008849 | 19.732  |
| gi 52350704 gb AY609419.1 | green        | 112.9031 | 33.9984 | 0.797776 | 0.105791 | 22.37   |
| gi 52350710 gb AY609425.1 | purple       | 213.4124 | 20.5281 | -0.77384 | 0.12464  | 28.856  |
| gi 52350723 gb AY609438.1 | green        | 85.30429 | 35.2153 | 0.825687 | 0.085042 | 30.004  |
| gi 52350726 gb AY609441.1 | royalblue    | 323.8802 | 19.8599 | 0.852075 | 0.06676  | 23.206  |
| gi 52350728 gb AY609443.1 | tan          | 812.6684 | 59.6284 | 0.969801 | 0.006271 | 35.324  |
| gi 52350742 gb AY609457.1 | green        | 122.0051 | 36.8487 | 0.82165  | 0.087957 | 149.976 |
| gi 52351065 gb AY609470.1 | navy         | 198.077  | 28.7715 | 0.813323 | 0.094063 | 27.186  |
| gi 52351066 gb AY609471.1 | grey         | 170.469  | 8.28387 | 0.842363 | 0.073329 | 6.79    |
| gi 52351067 gb AY609472.1 | white        | 976.938  | 28.2722 | 0.763057 | 0.133422 | 19.818  |
| gi 52351069 gb AY609474.1 | blue         | 804.3281 | 232.745 | 0.969754 | 0.006286 | 11.98   |
| gi 52351072 gb AY609477.1 | red          | 521.4685 | 110.738 | 0.999778 | 3.97E-06 | 71.29   |
| gi 52351075 gb AY609480.1 | pink         | 115.0692 | 13.2352 | 0.166238 | 0.789318 | 7.35    |
| gi 52351083 gb AY609488.1 | turquoise    | 641.8348 | 212.031 | 0.874586 | 0.052301 | 35.044  |
| gi 52351086 gb AY609491.1 | lightcyan    | 301.4618 | 41.847  | 0.974498 | 0.00487  | 21.094  |
| gi 52351090 gb AY609495.1 | brown        | 114.5043 | 40.3069 | 0.853062 | 0.066104 | 181.732 |
| gi 52351095 gb AY609500.1 | blue         | 701.1368 | 181.818 | 0.91732  | 0.028182 | 29.096  |
| gi 52351120 gb AY609525.1 | turquoise    | 764.3968 | 247.251 | 0.936168 | 0.019173 | 34.18   |
| gi 52351125 gb AY609530.1 | turquoise    | 439.5552 | 149.161 | 0.768622 | 0.128866 | 7.676   |
| gi 52351148 gb AY609553.1 | blue         | 839.4977 | 234.485 | 0.974976 | 0.004734 | 60.854  |
| gi 52351153 gb AY609558.1 | blue         | 914.8499 | 226.167 | 0.96429  | 0.008057 | 15.972  |
| gi 52351155 gb AY609560.1 | midnightblue | 153.1638 | 42.3842 | 0.978262 | 0.003835 | 35.028  |
| gi 52351156 gb AY609561.1 | violet       | 997.652  | 70.3596 | 0.985592 | 0.002072 | 23.57   |
| gi 52351160 gb AY609565.1 | lightcyan    | 295.1319 | 40.6736 | 0.975399 | 0.004615 | 6.174   |
| gi 52351167 gb AY609572.1 | red          | 560.588  | 105.907 | 0.990061 | 0.001188 | 121.252 |
| gi 52351176 gb AY609581.1 | blue         | 898.6532 | 244.574 | 0.983223 | 0.002602 | 6.368   |
| gi 52351185 gb AY609590.1 | turquoise    | 517.9156 | 136.693 | 0.780606 | 0.119216 | 9.38    |
| gi 52351201 gb AY609606.1 | darkorange   | 118.4629 | 16.6494 | 0.870609 | 0.054775 | 49.552  |
| gi 52351209 gb AY609612.1 | black        | 980.6067 | 97.019  | 0.994251 | 0.000523 | 66.864  |
| gi 52351212 gb AY609615.1 | turquoise    | 522.5709 | 124.943 | 0.753428 | 0.141415 | 18.864  |
| gi 52351257 gb AY609689.1 | orange       | 561.0542 | 29.1651 | 0.955172 | 0.011317 | 95.278  |
| gi 52351277 gb AY609709.1 | lightyellow  | 974.1837 | 62.8421 | 0.997795 | 0.000124 | 51.864  |
| gi 52351285 gb AY609717.1 | brown        | 229.7148 | 55.3596 | 0.841065 | 0.074221 | 1.54    |
| gi 52351294 gb AY609726.1 | red          | 530.315  | 100.536 | 0.978045 | 0.003892 | 4.632   |
| gi 52351296 gb AY609728.1 | royalblue    | 403.551  | 32.5075 | 0.995872 | 0.000318 | 41.658  |
| gi 52351300 gb AY609732.1 | royalblue    | 314.1197 | 32.3819 | 0.981144 | 0.003099 | 32.45   |
| gi 52351303 gb AY609735.1 | yellow       | 158.35   | 49.1714 | 0.785672 | 0.115205 | 10.288  |
| gi 52351323 gb AY609755.1 | blue         | 757.6878 | 211.964 | 0.944956 | 0.015374 | 60.616  |
| gi 52351333 gb AY609765.1 | red          | 427.6887 | 103.805 | 0.985589 | 0.002072 | 26.416  |
| gi 52351341 gb AY609773.1 | grey60       | 964.1523 | 62.0393 | 0.994114 | 0.000542 | 5.726   |
| gi 52351346 gb AY609778.1 | royalblue    | 281.2193 | 28.8346 | 0.939559 | 0.017675 | 45.312  |
| gi 52351351 gb AY609781.1 | turquoise    | 454.5411 | 151.711 | 0.822734 | 0.087171 | 15.122  |
| gi 52351368 gb AY609798.1 | navy         | 187.1434 | 31.8201 | 0.885342 | 0.045796 | 19.674  |
| gi 52351373 gb AY609803.1 | turquoise    | 619.5164 | 195.387 | 0.88507  | 0.045957 | 46.446  |
| gi 52351374 gb AY609804.1 | magenta      | 252.7255 | 77.3728 | 0.985499 | 0.002092 | 4.536   |
| gi 52351378 gb AY609808.1 | blue         | 947.3261 | 235.924 | 0.974001 | 0.005013 | 5.136   |

|                           |             |          |         |          |          |         |
|---------------------------|-------------|----------|---------|----------|----------|---------|
| gi 52351391 gb AY609821.1 | grey60      | 980.5193 | 62.8623 | 0.996857 | 0.000211 | 12.87   |
| gi 52351393 gb AY609823.1 | white       | 940.0734 | 29.7143 | 0.833737 | 0.079321 | 22.298  |
| gi 52351397 gb AY609827.1 | violet      | 991.7686 | 70.8928 | 0.987177 | 0.00174  | 10.968  |
| gi 52351406 gb AY609836.1 | brown       | 126.8407 | 41.9708 | 0.808185 | 0.097892 | 74.332  |
| gi 52351416 gb AY609846.1 | tan         | 938.2989 | 66.601  | 0.991284 | 0.000975 | 46.648  |
| gi 52351419 gb AY609849.1 | white       | 173.7589 | 21.6823 | 0.72586  | 0.165034 | 55.808  |
| gi 52351430 gb AY609860.1 | turquoise   | 382.7239 | 123.635 | 0.726726 | 0.164276 | 13.002  |
| gi 52351432 gb AY609862.1 | blue        | 794.2927 | 216.989 | 0.953114 | 0.012101 | 31.094  |
| gi 52351435 gb AY609865.1 | sienna3     | 934.0576 | 25.8051 | 0.997593 | 0.000142 | 6.686   |
| gi 52351436 gb AY609866.1 | turquoise   | 338.9508 | 84.3669 | 0.615755 | 0.268829 | 41.306  |
| gi 52351444 gb AY609874.1 | black       | 968.4899 | 99.2316 | 0.999362 | 1.94E-05 | 86.276  |
| gi 52351447 gb AY609877.1 | salmon      | 210.6232 | 39.7764 | 0.928578 | 0.022666 | 59.436  |
| gi 52351453 gb AY609883.1 | orange      | 301.8186 | 30.3861 | 0.966355 | 0.007371 | 3.552   |
| gi 52351454 gb AY609884.1 | turquoise   | 647.4077 | 210.37  | 0.879523 | 0.049281 | 33.576  |
| gi 52351462 gb AY609892.1 | darkorange  | 184.2006 | 19.0581 | 0.937888 | 0.018408 | 19.598  |
| gi 52351474 gb AY609904.1 | turquoise   | 564.8286 | 154.291 | 0.832144 | 0.080443 | 100.202 |
| gi 52351476 gb AY609906.1 | violet      | 967.6915 | 73.211  | 0.993804 | 0.000585 | 53.002  |
| gi 52351490 gb AY609920.1 | blue        | 949.7571 | 217.403 | 0.955    | 0.011382 | 22.088  |
| gi 52351500 gb AY609930.1 | salmon      | 141.7772 | 41.6094 | 0.945517 | 0.015141 | 15.566  |
| gi 52351521 gb AY609951.1 | green       | 132.2751 | 57.7431 | 0.980328 | 0.003302 | 82.722  |
| gi 52351524 gb AY609954.1 | pink        | 194.5623 | 56.8253 | 0.941329 | 0.016909 | 9.82    |
| gi 52351536 gb AY609966.1 | turquoise   | 678.7508 | 221.245 | 0.894723 | 0.040351 | 21.33   |
| gi 52351538 gb AY609968.1 | turquoise   | 917.9467 | 269.052 | 0.991162 | 0.000996 | 56.406  |
| gi 52351540 gb AY609970.1 | white       | 163.6132 | 8.03935 | 0.266344 | 0.664934 | 5.324   |
| gi 52351544 gb AY609974.1 | turquoise   | 332.3249 | 93.231  | 0.642966 | 0.241908 | 29.728  |
| gi 52351547 gb AY609977.1 | blue        | 791.0371 | 218.918 | 0.953318 | 0.012023 | 71.53   |
| gi 52351567 gb AY609997.1 | green       | 109.0297 | 53.6208 | 0.953497 | 0.011954 | 10.246  |
| gi 52351573 gb AY610003.1 | darkmagenta | 973.0673 | 26.2455 | 0.988248 | 0.001527 | 11.498  |
| gi 52351582 gb AY610012.1 | darkgrey    | 116.9327 | 16.5322 | 0.807031 | 0.098759 | 21.16   |
| gi 52351587 gb AY610017.1 | blue        | 908.3072 | 241.937 | 0.978098 | 0.003878 | 114.726 |
| gi 52351591 gb AY610021.1 | black       | 982.2582 | 99.2161 | 0.99924  | 2.52E-05 | 16.258  |
| gi 52351593 gb AY610023.1 | darkgreen   | 229.7062 | 17.9894 | 0.768654 | 0.12884  | 14.972  |
| gi 52351594 gb AY610024.1 | brown       | 178.6161 | 57.2775 | 0.958787 | 0.009981 | 61.638  |
| gi 52351609 gb AY610039.1 | green       | 130.6324 | 20.1529 | 0.32079  | 0.598675 | 4.992   |
| gi 52351611 gb AY610041.1 | turquoise   | 629.1899 | 197.614 | 0.877843 | 0.050302 | 9.218   |
| gi 52351614 gb AY610044.1 | turquoise   | 873.3606 | 264.425 | 0.977083 | 0.00415  | 11.634  |
| gi 52351621 gb AY610051.1 | blue        | 743.4083 | 224.058 | 0.958823 | 0.009968 | 39.19   |
| gi 52351639 gb AY610069.1 | red         | 401.958  | 82.3605 | 0.93502  | 0.019689 | 28.168  |
| gi 52351674 gb AY610104.1 | sienna3     | 984.3348 | 26.0055 | 0.99911  | 3.19E-05 | 11.082  |
| gi 52351676 gb AY610106.1 | red         | 531.2851 | 105.368 | 0.9884   | 0.001497 | 31.924  |
| gi 52351677 gb AY610107.1 | black       | 948.953  | 87.0856 | 0.972772 | 0.005371 | 43.348  |
| gi 52351697 gb AY610127.1 | brown       | 109.0704 | 21.3505 | 0.597236 | 0.287576 | 785.492 |
| gi 52351702 gb AY610132.1 | turquoise   | 447.2925 | 138.869 | 0.794039 | 0.108672 | 38.752  |
| gi 52351709 gb AY610139.1 | darkorange  | 144.8549 | 7.53943 | 0.329738 | 0.587902 | 20.414  |
| gi 52351717 gb AY610147.1 | magenta     | 270.7519 | 78.8671 | 0.990779 | 0.001061 | 6.68    |
| gi 52351733 gb AY610163.1 | red         | 470.5565 | 77.574  | 0.922135 | 0.025775 | 9.598   |
| gi 52351736 gb AY610166.1 | lightcyan   | 179.4378 | 13.7719 | 0.563021 | 0.323056 | 313.622 |
| gi 52351738 gb AY610168.1 | navy        | 130.2316 | 7.24906 | 0.374911 | 0.53408  | 41.954  |

|                                |              |          |         |          |          |          |
|--------------------------------|--------------|----------|---------|----------|----------|----------|
| gi 52351742 gb AY610172.1      | midnightblue | 132.2426 | 43.4128 | 0.987055 | 0.001765 | 31.446   |
| gi 52351745 gb AY610175.1      | black        | 981.4256 | 98.1841 | 0.996997 | 0.000197 | 10.502   |
| gi 52351750 gb AY610180.1      | white        | 129.0673 | 12.7707 | 0.626035 | 0.258569 | 34.702   |
| gi 52351755 gb AY610185.1      | magenta      | 293.5023 | 52.487  | 0.899653 | 0.037579 | 0.968    |
| gi 52351761 gb AY610191.1      | black        | 963.5199 | 96.4195 | 0.99292  | 0.000714 | 27.32    |
| gi 52351763 gb AY610193.1      | orange       | 625.5681 | 24.4672 | 0.915192 | 0.029268 | 49.146   |
| gi 52351796 gb AY610214.1      | green        | 119.4571 | 42.5255 | 0.875517 | 0.051727 | 49.48    |
| gi 52351805 gb AY610223.1      | blue         | 708.9835 | 200.753 | 0.93589  | 0.019298 | 2.736    |
| gi 52351807 gb AY610225.1      | purple       | 50.74911 | 10.949  | 0.591164 | 0.293795 | 34.436   |
| gi 52351871 gb AY610289.1      | green        | 92.03027 | 55.7749 | 0.950528 | 0.013111 | 2.816    |
| gi 52351873 gb AY610291.1      | blue         | 862.5275 | 198.176 | 0.935493 | 0.019476 | 181.004  |
| gi 52351877 gb AY610295.1      | turquoise    | 503.0464 | 125.331 | 0.783839 | 0.116652 | 178.258  |
| gi 52351890 gb AY610308.1      | turquoise    | 648.3239 | 170.084 | 0.859276 | 0.062016 | 24.644   |
| gi 52351923 gb AY610341.1      | turquoise    | 647.1909 | 214.366 | 0.880569 | 0.048649 | 8.418    |
| gi 52351935 gb AY610353.1      | blue         | 820.8646 | 242.34  | 0.980084 | 0.003364 | 9.788    |
| gi 52351947 gb AY610365.1      | green        | 133.9092 | 34.9706 | 0.80534  | 0.100033 | 23.942   |
| gi 52351956 gb AY610374.1      | blue         | 861.6441 | 248.663 | 0.987533 | 0.001668 | 27.424   |
| gi 52351961 gb AY610379.1      | yellow       | 298.0811 | 104.712 | 0.964543 | 0.007972 | 17.838   |
| gi 52351978 gb AY610394.1      | turquoise    | 406.8118 | 137.591 | 0.786651 | 0.114435 | 153.256  |
| gi 52351995 gb AY610411.1      | royalblue    | 130.2185 | 9.01956 | 0.582128 | 0.303111 | 21.332   |
| gi 52352038 gb AY610454.1      | turquoise    | 158.0124 | 50.2191 | 0.494164 | 0.39745  | 30.528   |
| gi 52352062 gb AY610478.1      | grey         | 274.7195 | 12.542  | 0.992707 | 0.000747 | 14.088   |
| gi 52352069 gb AY610485.1      | grey         | 156.1662 | 14.53   | -0.95273 | 0.012249 | 8.546    |
| gi 52352072 gb AY610488.1      | blue         | 669.7226 | 169.734 | 0.902492 | 0.036011 | 6.886    |
| gi 52352090 gb AY610506.1      | blue         | 756.0995 | 209.668 | 0.940565 | 0.017238 | 13.66    |
| gi 52352705 gb AY609625.1      | turquoise    | 381.011  | 122.633 | 0.739005 | 0.15364  | 56.284   |
| gi 52352724 gb AY609644.1      | blue         | 925.9085 | 242.424 | 0.979164 | 0.003599 | 24.546   |
| gi 52352730 gb AY609650.1      | violet       | 917.8991 | 73.7301 | 0.995181 | 0.000401 | 95.92    |
| gi 54020965 ref NM_001005726.1 | turquoise    | 471.1881 | 139.311 | 0.790908 | 0.111103 | 82.362   |
| gi 54607194 ref NM_001006592.1 | yellow       | 238.2823 | 72.0512 | 0.884101 | 0.046532 | 12599.26 |
| gi 55741470 ref NM_214042.1    | turquoise    | 861.2913 | 264.188 | 0.968801 | 0.006584 | 48.38    |
| gi 55741485 ref NM_213855.1    | midnightblue | 88.17778 | 4.73638 | -0.24754 | 0.688071 | 2031.626 |
| gi 55741489 ref NM_214136.1    | salmon       | 165.8115 | 36.9749 | 0.911996 | 0.030922 | 58.668   |
| gi 55741720 ref NM_001001534.1 | brown        | 90.92589 | 34.2818 | 0.745626 | 0.147991 | 770.902  |
| gi 55741808 ref NM_213748.1    | midnightblue | 83.22974 | 5.70522 | -0.22376 | 0.717493 | 3662.24  |
| gi 55741810 ref NM_001001863.1 | green        | 101.501  | 42.7516 | 0.853433 | 0.065857 | 5274.71  |
| gi 55741820 ref NM_214202.1    | brown        | 203.9259 | 59.6096 | 0.834823 | 0.078558 | 1.428    |
| gi 55742741 ref NM_213920.1    | grey         | 253.1393 | 11.6066 | 0.901979 | 0.036293 | 275.752  |
| gi 55742771 ref NM_001007191.1 | turquoise    | 636.6807 | 211.587 | 0.874687 | 0.052238 | 9.7      |
| gi 55742846 ref NM_214329.1    | blue         | 735.1089 | 211.628 | 0.951472 | 0.012739 | 82.828   |
| gi 56606056 ref NM_001008481.1 | yellow       | 272.2299 | 101.482 | 0.962721 | 0.008592 | 12.144   |
| gi 56711365 ref NM_001008688.1 | green        | 126.9009 | 35.7913 | 0.826323 | 0.084586 | 4821.764 |
| gi 56711367 ref NM_001008691.1 | brown        | 94.80425 | 37.6146 | 0.802724 | 0.102013 | 4.894    |
| gi 56792875 gb AY682217.1      | brown        | 75.63334 | 18.2997 | 0.627233 | 0.25738  | 0.648    |
| gi 57527981 ref NM_001009576.1 | darkgreen    | 202.648  | 29.0953 | 0.910964 | 0.031463 | 14.558   |
| gi 57528034 ref NM_001009582.1 | magenta      | 225.9154 | 68.1217 | 0.957723 | 0.010369 | 19.554   |
| gi 58332861 ref NM_001011507.1 | blue         | 603.605  | 116.205 | 0.817819 | 0.090751 | 29.492   |
| gi 58801554 ref NM_001011727.1 | salmon       | 188.7925 | 48.7723 | 0.980954 | 0.003146 | 63.732   |

|                                   |               |          |         |          |          |         |
|-----------------------------------|---------------|----------|---------|----------|----------|---------|
| gi 60302865 ref NM_001012613.1    | grey60        | 866.8105 | 60.6001 | 0.989403 | 0.001307 | 2.966   |
| gi 60419073 gb AY856514.2         | lightcyan     | 261.6074 | 40.4872 | 0.974949 | 0.004742 | 22.112  |
| gi 61098755 gb AY820766.1         | pink          | 89.69367 | 6.89136 | 0.24391  | 0.692552 | 10.02   |
| gi 61696637 gb AY803100.1         | brown         | 238.2935 | 22.6882 | 0.629377 | 0.255256 | 2.708   |
| gi 6650729 gb AF116346.1 AF116346 | turquoise     | 251.5603 | 71.8343 | 0.612817 | 0.271781 | 8.882   |
| gi 68534989 ref NM_001025224.1    | brown         | 72.33837 | 26.4543 | 0.474296 | 0.419582 | 198.302 |
| gi 70778850 ref NM_214094.2       | midnightblue  | 78.81873 | 29.987  | 0.906742 | 0.033705 | 1.866   |
| gi 71834281 ref NM_214197.2       | pink          | 287.4646 | 69.8608 | 0.962643 | 0.008619 | 103.242 |
| gi 72535177 ref NM_001031781.1    | midnightblue  | 158.2597 | 28.9589 | 0.870809 | 0.054649 | 878.962 |
| gi 72535201 ref NM_001031794.1    | white         | 203.5278 | 25.0264 | 0.746951 | 0.146868 | 142.75  |
| gi 73853889 ref NM_001032359.1    | greenyellow   | 147.2312 | 41.7788 | 0.929109 | 0.022415 | 699.608 |
| gi 73853893 ref NM_001032358.1    | turquoise     | 199.9127 | 43.6434 | 0.450455 | 0.446497 | 10.134  |
| gi 74024908 ref NM_001032379.1    | turquoise     | 896.8457 | 255.621 | 0.970243 | 0.006134 | 49.376  |
| gi 74136750 ref NM_001033009.1    | midnightblue  | 174.2116 | 40.6774 | 0.966828 | 0.007216 | 5.282   |
| gi 74136760 ref NM_001033014.1    | violet        | 877.2253 | 71.0546 | 0.98772  | 0.001631 | 121.53  |
| gi 77628017 ref NM_001008689.2    | magenta       | 198.3406 | 62.2726 | 0.937477 | 0.01859  | 116.54  |
| gi 78364925 gb DQ225117.1         | royalblue     | 259.8118 | 19.7144 | 0.875299 | 0.051861 | 6.666   |
| gi 80971509 ref NM_001037151.1    | greenyellow   | 173.6786 | 50.7966 | 0.98155  | 0.003    | 6.418   |
| gi 80971515 ref NM_001037152.1    | white         | 173.9272 | 21.6802 | 0.862825 | 0.059717 | 4.078   |
| gi 82617535 ref NM_001037322.1    | white         | 150.8865 | 6.80926 | 0.197085 | 0.750698 | 8.584   |
| gi 83921642 ref NM_001038007.1    | grey60        | 990.9169 | 61.828  | 0.993426 | 0.000639 | 77.798  |
| gi 84579912 ref NM_001038644.1    | turquoise     | 812.2483 | 258.373 | 0.957208 | 0.010558 | 18.478  |
| gi 84619523 ref NM_001038694.1    | darkorange    | 137.6109 | 8.23363 | 0.355875 | 0.55664  | 9.704   |
| gi 84874691 ref NM_001038632.1    | pink          | 86.11592 | 9.03056 | 0.204033 | 0.74203  | 14.638  |
| gi 89574200 gb DQ402993.1         | darkturquoise | 99.14844 | 13.2797 | 0.773918 | 0.124574 | 1.772   |
| gi 89886172 ref NM_001039748.1    | navy          | 123.5747 | 9.23937 | -0.1409  | 0.8212   | 66.054  |
| gi 89886176 ref NM_001039750.1    | turquoise     | 844.7661 | 248.785 | 0.953204 | 0.012066 | 4.342   |
| gi 90017493 ref NM_214184.2       | blue          | 919.3536 | 215.969 | 0.951896 | 0.012573 | 400.832 |
| gi 92020093 dbj AB237777.1        | blue          | 775.7696 | 161.369 | 0.888913 | 0.043698 | 13.04   |
| gnl UG Ssc#S14768592              | brown         | 214.351  | 61.0552 | 0.866342 | 0.057467 | 1.8     |
| gnl UG Ssc#S14889148              | lightgreen    | 291.8695 | 60.0714 | 0.995203 | 0.000398 | 2.244   |
| gnl UG Ssc#S14891120              | darkgreen     | 258.4531 | 36.9605 | 0.982405 | 0.002794 | 32.252  |
| gnl UG Ssc#S14891216              | lightcyan     | 244.6337 | 34.1659 | 0.927005 | 0.023413 | 1.102   |
| gnl UG Ssc#S14894901              | green         | 70.96983 | 39.4257 | 0.818472 | 0.090272 | 16.488  |
| gnl UG Ssc#S14900031              | turquoise     | 392.6413 | 110.501 | 0.695867 | 0.191889 | 9.504   |
| gnl UG Ssc#S14900094              | darkturquoise | 108.6304 | 18.8112 | 0.851017 | 0.067466 | 4.102   |
| gnl UG Ssc#S15981045              | white         | 965.3194 | 28.9882 | 0.798266 | 0.105415 | 1.142   |
| gnl UG Ssc#S16511729              | blue          | 706.7269 | 195.333 | 0.927265 | 0.023289 | 148.854 |
| gnl UG Ssc#S16513699              | lightgreen    | 304.8673 | 58.6608 | 0.99036  | 0.001135 | 0.794   |
| gnl UG Ssc#S16513921              | brown         | 108.9817 | 32.7383 | 0.582276 | 0.302958 | 7.502   |
| gnl UG Ssc#S16514435              | darkgrey      | 220.0109 | 28.8843 | 0.951863 | 0.012586 | 6.792   |
| gnl UG Ssc#S16514740              | black         | 905.9652 | 92.551  | 0.984843 | 0.002235 | 6.756   |
| gnl UG Ssc#S16514775              | pink          | 254.53   | 72.4299 | 0.989005 | 0.001382 | 6.992   |
| gnl UG Ssc#S16515033              | salmon        | 182.0088 | 45.2416 | 0.961103 | 0.009155 | 21.842  |
| gnl UG Ssc#S16515706              | turquoise     | 480.1598 | 154.036 | 0.81546  | 0.092484 | 20.516  |
| gnl UG Ssc#S16515765              | sienna3       | 985.0201 | 26.0117 | 0.999135 | 3.05E-05 | 15.44   |
| gnl UG Ssc#S16515841              | turquoise     | 567.2304 | 187.804 | 0.886666 | 0.045014 | 3.242   |
| gnl UG Ssc#S16516581              | yellow        | 248.1625 | 87.2663 | 0.923508 | 0.025102 | 6.374   |

|                      |               |          |         |          |          |         |
|----------------------|---------------|----------|---------|----------|----------|---------|
| gnl UG Ssc#S16517530 | violet        | 945.0526 | 74.9882 | 0.998607 | 6.24E-05 | 11.172  |
| gnl UG Ssc#S16517601 | darkred       | 253.0364 | 40.9917 | 0.976083 | 0.004424 | 3.376   |
| gnl UG Ssc#S16517614 | violet        | 989.0092 | 72.2569 | 0.991041 | 0.001016 | 6.154   |
| gnl UG Ssc#S16517726 | paleturquoise | 150.751  | 18.0733 | 0.94053  | 0.017253 | 470.708 |
| gnl UG Ssc#S16518321 | navy          | 163.5991 | 43.8705 | 0.991204 | 0.000989 | 15.906  |
| gnl UG Ssc#S16761746 | salmon        | 152.4442 | 48.4179 | 0.980126 | 0.003353 | 54.88   |
| gnl UG Ssc#S16761785 | yellowgreen   | 165.9927 | 15.3662 | 0.955772 | 0.011091 | 38.11   |
| gnl UG Ssc#S16761818 | royalblue     | 343.2137 | 22.3096 | 0.880689 | 0.048576 | 6.876   |
| gnl UG Ssc#S16763004 | pink          | 76.6578  | 21.8282 | 0.555095 | 0.331423 | 15.158  |
| gnl UG Ssc#S16763253 | yellow        | 303.6539 | 115.543 | 0.989416 | 0.001305 | 2.17    |
| gnl UG Ssc#S16763399 | purple        | 239.6388 | 20.5362 | -0.75683 | 0.138574 | 2.758   |
| gnl UG Ssc#S16763478 | royalblue     | 395.2996 | 32.5846 | 0.995911 | 0.000314 | 17.246  |
| gnl UG Ssc#S16763868 | salmon        | 157.5059 | 48.6472 | 0.980301 | 0.003309 | 29.784  |
| gnl UG Ssc#S16764486 | darkturquoise | 232.5725 | 32.4608 | 0.980693 | 0.003211 | 4.272   |
| gnl UG Ssc#S16767076 | greenyellow   | 120.5923 | 22.2739 | 0.771672 | 0.126389 | 98.16   |
| gnl UG Ssc#S16767694 | yellow        | 285.4079 | 104.009 | 0.962358 | 0.008717 | 1.674   |
| gnl UG Ssc#S16768026 | yellowgreen   | 165.7777 | 16.0837 | 0.965961 | 0.0075   | 14.168  |
| gnl UG Ssc#S16768494 | darkred       | 193.3378 | 37.8924 | 0.944932 | 0.015384 | 1.908   |
| gnl UG Ssc#S16769025 | lightcyan     | 253.3487 | 38.4381 | 0.96561  | 0.007616 | 10.782  |
| gnl UG Ssc#S16769591 | turquoise     | 891.7551 | 260.479 | 0.969639 | 0.006322 | 4.428   |
| gnl UG Ssc#S16769624 | turquoise     | 871.3649 | 246.377 | 0.958356 | 0.010138 | 13.292  |
| gnl UG Ssc#S16770187 | purple        | 159.3725 | 18.151  | -0.79271 | 0.109701 | 7.354   |
| gnl UG Ssc#S16771004 | darkgreen     | 263.9833 | 38.0084 | 0.98331  | 0.002582 | 2.972   |
| gnl UG Ssc#S17499579 | turquoise     | 488.3164 | 142.811 | 0.814999 | 0.092824 | 0.542   |
| gnl UG Ssc#S17499681 | red           | 485.9356 | 109.702 | 0.997756 | 0.000128 | 315.204 |
| gnl UG Ssc#S17500017 | turquoise     | 873.7224 | 262.415 | 0.979045 | 0.00363  | 16.782  |
| gnl UG Ssc#S17501425 | brown         | 228.1769 | 60.9154 | 0.901652 | 0.036473 | 9.668   |
| gnl UG Ssc#S17503882 | tan           | 958.5272 | 66.3499 | 0.989708 | 0.001251 | 12.804  |
| gnl UG Ssc#S17504229 | blue          | 819.2003 | 233.373 | 0.97325  | 0.005231 | 15.202  |
| gnl UG Ssc#S17505316 | darkturquoise | 136.1423 | 22.5702 | 0.878048 | 0.050177 | 1.652   |
| gnl UG Ssc#S17505417 | white         | 143.6732 | 13.1723 | 0.688499 | 0.198659 | 12.038  |
| gnl UG Ssc#S17505677 | purple        | 136.053  | 10.8798 | -0.5669  | 0.318985 | 1.45    |
| gnl UG Ssc#S17505852 | yellow        | 282.0685 | 100.353 | 0.953334 | 0.012016 | 1.608   |
| gnl UG Ssc#S17508314 | yellow        | 209.0617 | 73.3576 | 0.880739 | 0.048546 | 0.566   |
| gnl UG Ssc#S17509886 | brown         | 179.079  | 56.6003 | 0.975402 | 0.004614 | 517.992 |
| gnl UG Ssc#S17510046 | turquoise     | 430.4638 | 94.6007 | 0.680092 | 0.206465 | 6.76    |
| gnl UG Ssc#S17510077 | darkorange    | 200.6176 | 18.4416 | 0.971047 | 0.005888 | 99.302  |
| gnl UG Ssc#S17510233 | green         | 94.51446 | 50.6329 | 0.924465 | 0.024636 | 87.974  |
| gnl UG Ssc#S17510311 | turquoise     | 271.2002 | 62.4344 | 0.567573 | 0.318275 | 7.972   |
| gnl UG Ssc#S17510336 | tan           | 908.6874 | 67.9846 | 0.995788 | 0.000328 | 17.336  |
| gnl UG Ssc#S17510396 | turquoise     | 418.3314 | 135.043 | 0.750217 | 0.144111 | 59.464  |
| gnl UG Ssc#S17510398 | grey          | 159.1383 | 13.23   | 0.319614 | 0.600094 | 256.824 |
| gnl UG Ssc#S17510452 | blue          | 967.4455 | 236.138 | 0.974986 | 0.004731 | 21.216  |
| gnl UG Ssc#S17510525 | green         | 165.5002 | 22.5211 | 0.414987 | 0.487206 | 75.978  |
| gnl UG Ssc#S17510796 | magenta       | 248.9736 | 77.1984 | 0.985123 | 0.002173 | 5.668   |
| gnl UG Ssc#S17510917 | lightcyan     | 229.3552 | 36.0917 | 0.937046 | 0.018781 | 4.184   |
| gnl UG Ssc#S17510986 | turquoise     | 885.4196 | 255.875 | 0.965514 | 0.007648 | 200.132 |
| gnl UG Ssc#S17511033 | orange        | 562.3572 | 32.5652 | 0.97801  | 0.003902 | 27.218  |

|                      |              |          |         |          |          |         |
|----------------------|--------------|----------|---------|----------|----------|---------|
| gnl UG Ssc#S17511146 | tan          | 962.3049 | 59.6627 | 0.966572 | 0.0073   | 24.24   |
| gnl UG Ssc#S17511222 | pink         | 176.099  | 28.6982 | 0.759107 | 0.136684 | 2.49    |
| gnl UG Ssc#S17511240 | black        | 961.7817 | 90.1936 | 0.980198 | 0.003335 | 97.84   |
| gnl UG Ssc#S17511285 | brown        | 98.31572 | 36.6734 | 0.669445 | 0.21647  | 449.332 |
| gnl UG Ssc#S17511386 | turquoise    | 901.1112 | 271.136 | 0.985745 | 0.002039 | 532.772 |
| gnl UG Ssc#S17511419 | blue         | 858.4414 | 232.638 | 0.970282 | 0.006122 | 35.118  |
| gnl UG Ssc#S17511723 | pink         | 114.3998 | 11.446  | -0.08419 | 0.892937 | 20.754  |
| gnl UG Ssc#S17511887 | magenta      | 277.6177 | 54.5217 | 0.909762 | 0.032096 | 7.496   |
| gnl UG Ssc#S17512005 | turquoise    | 792.5054 | 251.593 | 0.954805 | 0.011455 | 28.704  |
| gnl UG Ssc#S17512032 | turquoise    | 168.0091 | 38.2944 | 0.440361 | 0.458003 | 1.128   |
| gnl UG Ssc#S17512154 | green        | 83.22289 | 47.219  | 0.894004 | 0.040761 | 148.07  |
| gnl UG Ssc#S17512186 | turquoise    | 560.3517 | 181.911 | 0.867271 | 0.056878 | 21.872  |
| gnl UG Ssc#S17512237 | magenta      | 257.8846 | 75.7657 | 0.981177 | 0.003091 | 2.776   |
| gnl UG Ssc#S17512269 | yellow       | 139.9459 | 42.1924 | 0.748076 | 0.145917 | 54.436  |
| gnl UG Ssc#S17512288 | brown        | 67.19938 | 24.9255 | 0.673917 | 0.212252 | 3.21    |
| gnl UG Ssc#S17513253 | black        | 976.0026 | 88.6989 | 0.97641  | 0.004334 | 22.202  |
| gnl UG Ssc#S17513449 | blue         | 828.6787 | 170.589 | 0.903751 | 0.035323 | 23.518  |
| gnl UG Ssc#S17513694 | red          | 479.4392 | 109.246 | 0.996839 | 0.000213 | 9.21    |
| gnl UG Ssc#S17513715 | blue         | 843.0476 | 234.773 | 0.973596 | 0.00513  | 35.384  |
| gnl UG Ssc#S17513789 | turquoise    | 219.1361 | 55.4605 | 0.506428 | 0.38393  | 8.346   |
| gnl UG Ssc#S17513958 | turquoise    | 755.7763 | 234.611 | 0.92167  | 0.026005 | 17.208  |
| gnl UG Ssc#S17513979 | green        | 112.3749 | 55.9435 | 0.959789 | 0.009621 | 165.39  |
| gnl UG Ssc#S17514069 | red          | 397.9348 | 99.0413 | 0.975632 | 0.00455  | 9.722   |
| gnl UG Ssc#S17514190 | lightyellow  | 949.85   | 63.239  | 0.999049 | 3.52E-05 | 2.284   |
| gnl UG Ssc#S17514318 | salmon       | 186.4834 | 37.3202 | 0.910956 | 0.031467 | 27.132  |
| gnl UG Ssc#S17514565 | green        | 145.975  | 50.1288 | 0.947805 | 0.014202 | 22.052  |
| gnl UG Ssc#S17514632 | darkgreen    | 197.5766 | 29.904  | 0.905784 | 0.03422  | 634.34  |
| gnl UG Ssc#S17514667 | lightcyan    | 295.352  | 42.1253 | 0.985118 | 0.002174 | 14.014  |
| gnl UG Ssc#S17514838 | blue         | 924.7744 | 253.403 | 0.989526 | 0.001285 | 21.96   |
| gnl UG Ssc#S17515039 | brown        | 126.942  | 31.1074 | 0.651553 | 0.233573 | 4.496   |
| gnl UG Ssc#S17515108 | turquoise    | 730.1049 | 206.624 | 0.926452 | 0.023678 | 22.876  |
| gnl UG Ssc#S17515316 | yellow       | 213.9927 | 75.8848 | 0.88798  | 0.044243 | 24.224  |
| gnl UG Ssc#S17515611 | purple       | 182.4553 | 16.5371 | -0.91882 | 0.027427 | 34.506  |
| gnl UG Ssc#S17515701 | black        | 892.264  | 94.0158 | 0.988519 | 0.001474 | 27.612  |
| gnl UG Ssc#S17515754 | violet       | 945.399  | 74.7223 | 0.997888 | 0.000116 | 17.406  |
| gnl UG Ssc#S17515773 | black        | 977.7564 | 91.4766 | 0.982089 | 0.00287  | 50.314  |
| gnl UG Ssc#S17515809 | brown        | 220.5013 | 42.0687 | 0.732394 | 0.159341 | 20.362  |
| gnl UG Ssc#S17515842 | yellow       | 213.6047 | 70.5003 | 0.869604 | 0.055405 | 14.254  |
| gnl UG Ssc#S17516048 | blue         | 759.0311 | 198.811 | 0.930107 | 0.021947 | 38.456  |
| gnl UG Ssc#S17516064 | darkred      | 258.6464 | 43.2381 | 0.988407 | 0.001496 | 10.132  |
| gnl UG Ssc#S17516079 | royalblue    | 309.6366 | 30.0984 | 0.973852 | 0.005056 | 11.566  |
| gnl UG Ssc#S17516095 | magenta      | 223.923  | 71.2545 | 0.968919 | 0.006547 | 17.684  |
| gnl UG Ssc#S17516148 | blue         | 847.778  | 213.169 | 0.950724 | 0.013033 | 26.29   |
| gnl UG Ssc#S17516311 | turquoise    | 700.1707 | 226.636 | 0.931639 | 0.021234 | 500.688 |
| gnl UG Ssc#S17516549 | blue         | 963.434  | 216.396 | 0.956192 | 0.010934 | 27.584  |
| gnl UG Ssc#S17516828 | midnightblue | 83.21511 | 5.51948 | -0.44531 | 0.452351 | 50.244  |
| gnl UG Ssc#S17516920 | lightcyan    | 274.1938 | 40.1626 | 0.964714 | 0.007915 | 31.482  |
| gnl UG Ssc#S17516962 | midnightblue | 88.40938 | 31.6559 | 0.907886 | 0.033093 | 7.998   |



|                      |               |          |         |          |          |         |
|----------------------|---------------|----------|---------|----------|----------|---------|
| gnl UG Ssc#S17517004 | turquoise     | 895.2715 | 268.518 | 0.981749 | 0.002952 | 13.14   |
| gnl UG Ssc#S17517072 | salmon        | 161.1993 | 42.9906 | 0.949597 | 0.013481 | 2.93    |
| gnl UG Ssc#S17517096 | purple        | 144.0793 | 22.3529 | 0.862648 | 0.059832 | 28.144  |
| gnl UG Ssc#S17517121 | orange        | 504.5468 | 34.1176 | 0.990385 | 0.00113  | 3.518   |
| gnl UG Ssc#S17517147 | darkgreen     | 261.1594 | 37.8341 | 0.990309 | 0.001143 | 4.394   |
| gnl UG Ssc#S17517405 | skyblue       | 154.9525 | 24.3148 | 0.937373 | 0.018636 | 17.88   |
| gnl UG Ssc#S17517774 | green         | 89.07704 | 42.7698 | 0.860684 | 0.0611   | 8.962   |
| gnl UG Ssc#S17517964 | turquoise     | 824.9533 | 239.124 | 0.946015 | 0.014935 | 23.752  |
| gnl UG Ssc#S17518104 | midnightblue  | 215.1056 | 33.8213 | 0.919402 | 0.027133 | 10.914  |
| gnl UG Ssc#S17518111 | turquoise     | 634.1944 | 210.214 | 0.872009 | 0.053899 | 2.286   |
| gnl UG Ssc#S17518115 | pink          | 198.8618 | 57.9148 | 0.944786 | 0.015445 | 28.994  |
| gnl UG Ssc#S17518180 | paleturquoise | 172.0545 | 19.5278 | 0.949487 | 0.013524 | 29.24   |
| gnl UG Ssc#S17518305 | yellow        | 242.6386 | 85.0114 | 0.914722 | 0.029509 | 16.35   |
| gnl UG Ssc#S17518307 | turquoise     | 774.405  | 241.781 | 0.937881 | 0.018411 | 21.13   |
| gnl UG Ssc#S17518363 | turquoise     | 863.5923 | 258.424 | 0.965166 | 0.007763 | 28.978  |
| gnl UG Ssc#S17518385 | purple        | 113.1459 | 22.9092 | 0.902886 | 0.035795 | 5.498   |
| gnl UG Ssc#S17518565 | turquoise     | 738.7591 | 226.186 | 0.924236 | 0.024747 | 30.936  |
| gnl UG Ssc#S17518664 | sienna3       | 976.2211 | 25.8601 | 0.998007 | 0.000107 | 19.346  |
| gnl UG Ssc#S17518706 | green         | 116.3701 | 49.4294 | 0.928969 | 0.022481 | 15.24   |
| gnl UG Ssc#S17518758 | green         | 135.8439 | 48.7697 | 0.928039 | 0.022921 | 14.008  |
| gnl UG Ssc#S17518763 | turquoise     | 190.0961 | 63.0225 | 0.573952 | 0.311606 | 6.282   |
| gnl UG Ssc#S17518772 | blue          | 878.1758 | 249.626 | 0.986573 | 0.001864 | 28.812  |
| gnl UG Ssc#S17518773 | paleturquoise | 122.0311 | 13.507  | 0.860243 | 0.061386 | 10.936  |
| gnl UG Ssc#S17518795 | grey          | 165.2936 | 13.381  | -0.90492 | 0.034689 | 31.744  |
| gnl UG Ssc#S17518997 | black         | 977.3934 | 98.9456 | 0.998613 | 6.20E-05 | 29.604  |
| gnl UG Ssc#S17519017 | white         | 198.975  | 22.5095 | 0.834268 | 0.078948 | 10.946  |
| gnl UG Ssc#S17524473 | blue          | 778.0336 | 222.284 | 0.955564 | 0.011169 | 55.668  |
| gnl UG Ssc#S17524578 | greenyellow   | 244.3259 | 40.1697 | 0.911089 | 0.031397 | 26.42   |
| gnl UG Ssc#S17524627 | blue          | 929.2595 | 239.206 | 0.978829 | 0.003686 | 28.868  |
| gnl UG Ssc#S17524633 | yellowgreen   | 184.2265 | 18.2838 | 0.990731 | 0.00107  | 124.658 |
| gnl UG Ssc#S17524752 | navy          | 188.6895 | 26.883  | 0.752973 | 0.141796 | 33.116  |
| gnl UG Ssc#S17524900 | paleturquoise | 159.0919 | 15.0504 | 0.885546 | 0.045675 | 23.48   |
| gnl UG Ssc#S17524908 | blue          | 622.5608 | 188.431 | 0.92213  | 0.025778 | 3.35    |
| gnl UG Ssc#S17524953 | navy          | 149.5577 | 44.5098 | 0.979898 | 0.003411 | 39.116  |
| gnl UG Ssc#S17524981 | turquoise     | 466.0582 | 123.647 | 0.732913 | 0.158891 | 27.14   |
| gnl UG Ssc#S17524990 | turquoise     | 324.3387 | 76.7705 | 0.620903 | 0.263678 | 14.026  |
| gnl UG Ssc#S17525104 | grey          | 101.4048 | 7.08812 | 0.140863 | 0.821242 | 16.532  |
| gnl UG Ssc#S17525203 | darkgreen     | 279.3347 | 34.9576 | 0.976662 | 0.004265 | 8.568   |
| gnl UG Ssc#S17525225 | violet        | 870.5102 | 71.7755 | 0.989679 | 0.001257 | 4.08    |
| gnl UG Ssc#S17525376 | navy          | 111.3646 | 33.5119 | 0.854273 | 0.0653   | 26.292  |
| gnl UG Ssc#S17525378 | purple        | 149.1272 | 13.7305 | -0.56072 | 0.32548  | 11.668  |
| gnl UG Ssc#S17525409 | grey          | 273.7596 | 12.9673 | 0.969501 | 0.006364 | 7.146   |
| gnl UG Ssc#S17525410 | darkgrey      | 120.3033 | 17.6709 | 0.821991 | 0.08771  | 11.63   |
| gnl UG Ssc#S17525682 | lightyellow   | 972.4211 | 62.8442 | 0.997791 | 0.000125 | 213.61  |
| gnl UG Ssc#S17525753 | yellow        | 286.695  | 106.488 | 0.970109 | 0.006176 | 7.23    |
| gnl UG Ssc#S17525826 | greenyellow   | 175.6979 | 47.5829 | 0.961316 | 0.00908  | 10.284  |
| gnl UG Ssc#S17525865 | greenyellow   | 177.8976 | 48.3594 | 0.967344 | 0.007049 | 15.478  |
| gnl UG Ssc#S17526139 | turquoise     | 682.8407 | 191.463 | 0.895287 | 0.040031 | 23.1    |

|                      |               |          |         |          |          |         |
|----------------------|---------------|----------|---------|----------|----------|---------|
| gnl UG Ssc#S17526150 | grey          | 279.0844 | 12.7283 | 0.949085 | 0.013685 | 9.556   |
| gnl UG Ssc#S17526193 | salmon        | 307.0942 | 41.8703 | 0.937624 | 0.018525 | 63.318  |
| gnl UG Ssc#S17526232 | turquoise     | 219.3327 | 59.061  | 0.55515  | 0.331365 | 10.164  |
| gnl UG Ssc#S17526234 | blue          | 906.7952 | 229.406 | 0.9664   | 0.007356 | 22.37   |
| gnl UG Ssc#S17526265 | yellow        | 223.8139 | 67.4677 | 0.873622 | 0.052897 | 3.878   |
| gnl UG Ssc#S17526422 | brown         | 151.837  | 36.4261 | 0.70759  | 0.181256 | 18.494  |
| gnl UG Ssc#S17526634 | red           | 447.5266 | 98.066  | 0.973202 | 0.005245 | 18.298  |
| gnl UG Ssc#S17526834 | skyblue       | 107.5979 | 17.629  | 0.862718 | 0.059787 | 26.508  |
| gnl UG Ssc#S17526835 | grey60        | 986.8885 | 62.7034 | 0.996352 | 0.000264 | 5.414   |
| gnl UG Ssc#S17526874 | blue          | 830.5002 | 201.55  | 0.939854 | 0.017547 | 193.284 |
| gnl UG Ssc#S17526922 | magenta       | 264.2728 | 79.3695 | 0.991338 | 0.000967 | 13.762  |
| gnl UG Ssc#S17526927 | blue          | 945.6076 | 209.049 | 0.94733  | 0.014395 | 8.724   |
| gnl UG Ssc#S17526940 | red           | 486.2478 | 97.5362 | 0.971671 | 0.005699 | 15.994  |
| gnl UG Ssc#S17526987 | magenta       | 245.2676 | 77.1516 | 0.985147 | 0.002168 | 23.61   |
| gnl UG Ssc#S17527330 | turquoise     | 449.8628 | 144.716 | 0.802003 | 0.102561 | 104.698 |
| gnl UG Ssc#S17527420 | red           | 554.6491 | 91.8124 | 0.957564 | 0.010427 | 68.984  |
| gnl UG Ssc#S17527438 | turquoise     | 799.0809 | 247.791 | 0.963291 | 0.008396 | 36.56   |
| gnl UG Ssc#S17527454 | magenta       | 255.9152 | 78.5702 | 0.988935 | 0.001395 | 12.678  |
| gnl UG Ssc#S17527505 | darkmagenta   | 933.8661 | 26.4886 | 0.990017 | 0.001196 | 10.248  |
| gnl UG Ssc#S18260225 | blue          | 705.7677 | 211.754 | 0.949567 | 0.013492 | 26.278  |
| gnl UG Ssc#S18261002 | turquoise     | 911.8005 | 269.398 | 0.981831 | 0.002932 | 41.806  |
| gnl UG Ssc#S18262172 | grey60        | 932.4881 | 62.1602 | 0.99457  | 0.00048  | 16.424  |
| gnl UG Ssc#S18262357 | darkgreen     | 210.5403 | 32.2704 | 0.940868 | 0.017107 | 8.432   |
| gnl UG Ssc#S18263440 | black         | 885.9208 | 92.6667 | 0.985132 | 0.002171 | 16.164  |
| gnl UG Ssc#S18263529 | greenyellow   | 207.2076 | 54.5935 | 0.994006 | 0.000557 | 266.718 |
| gnl UG Ssc#S18263775 | skyblue       | 297.4738 | 27.9231 | 0.956479 | 0.010827 | 29.658  |
| gnl UG Ssc#S18263925 | brown         | 216.1531 | 61.6376 | 0.924471 | 0.024633 | 2.372   |
| gnl UG Ssc#S18266615 | black         | 936.5918 | 92.1788 | 0.98386  | 0.002455 | 9.164   |
| gnl UG Ssc#S18267174 | navy          | 185.7059 | 8.51173 | 0.535611 | 0.352217 | 19.428  |
| gnl UG Ssc#S18267480 | blue          | 802.1522 | 179.383 | 0.914983 | 0.029375 | 1.384   |
| gnl UG Ssc#S18267647 | darkmagenta   | 983.1549 | 26.085  | 0.986553 | 0.001868 | 20.47   |
| gnl UG Ssc#S18268726 | grey          | 168.4623 | 13.4791 | -0.95805 | 0.010248 | 9.148   |
| gnl UG Ssc#S18268814 | green         | 148.9794 | 20.117  | 0.203809 | 0.74231  | 18.398  |
| gnl UG Ssc#S18269890 | darkturquoise | 203.1586 | 32.2792 | 0.974238 | 0.004944 | 0.866   |
| gnl UG Ssc#S18270450 | darkred       | 275.0257 | 43.1431 | 0.989947 | 0.001208 | 4.9     |
| gnl UG Ssc#S18270499 | violet        | 929.4696 | 74.6499 | 0.997668 | 0.000135 | 0.272   |
| gnl UG Ssc#S18272639 | darkorange    | 117.7784 | 17.3645 | 0.912277 | 0.030776 | 8.71    |
| gnl UG Ssc#S18272798 | navy          | 262.5663 | 26.9346 | 0.813194 | 0.094159 | 8.298   |
| gnl UG Ssc#S18272948 | white         | 972.5178 | 29.1546 | 0.778184 | 0.121148 | 11.62   |
| gnl UG Ssc#S18274718 | darkmagenta   | 939.3157 | 26.955  | 0.993726 | 0.000596 | 8.774   |
| gnl UG Ssc#S18276256 | violet        | 784.3139 | 66.2885 | 0.973546 | 0.005144 | 19.36   |
| gnl UG Ssc#S18277539 | pink          | 90.5189  | 15.0714 | 0.17445  | 0.779015 | 68.136  |
| gnl UG Ssc#S18277825 | white         | 166.5006 | 20.1833 | 0.748839 | 0.145272 | 3.54    |
| gnl UG Ssc#S18281860 | brown         | 51.52596 | 14.0055 | 0.362183 | 0.549145 | 24.806  |
| gnl UG Ssc#S18282381 | brown         | 134.1926 | 41.8511 | 0.847289 | 0.069973 | 56.394  |
| gnl UG Ssc#S18283093 | tan           | 937.3036 | 68.1633 | 0.996151 | 0.000286 | 22.744  |
| gnl UG Ssc#S18283235 | blue          | 934.2018 | 208.831 | 0.947544 | 0.014308 | 14.814  |
| gnl UG Ssc#S18284222 | white         | 806.8139 | 27.1452 | 0.847271 | 0.069986 | 4.28    |

|                      |               |          |         |          |          |         |
|----------------------|---------------|----------|---------|----------|----------|---------|
| gnl UG Ssc#S18284670 | yellow        | 296.3186 | 109.752 | 0.976039 | 0.004436 | 8.428   |
| gnl UG Ssc#S18289792 | turquoise     | 324.9281 | 75.3573 | 0.59992  | 0.284838 | 11.72   |
| gnl UG Ssc#S18290449 | red           | 409.0446 | 101.359 | 0.980497 | 0.00326  | 427.76  |
| gnl UG Ssc#S18291801 | lightyellow   | 922.0185 | 62.6383 | 0.997122 | 0.000185 | 10.42   |
| gnl UG Ssc#S18292679 | pink          | 277.9826 | 66.8383 | 0.957372 | 0.010497 | 6.562   |
| gnl UG Ssc#S18292759 | red           | 487.2135 | 98.5013 | 0.973584 | 0.005133 | 16.992  |
| gnl UG Ssc#S18295197 | yellow        | 303.5973 | 117.116 | 0.993894 | 0.000572 | 1.504   |
| gnl UG Ssc#S18301441 | yellow        | 291.2468 | 110.281 | 0.977482 | 0.004043 | 4.34    |
| gnl UG Ssc#S18301820 | grey          | 282.9569 | 12.8693 | 0.992555 | 0.00077  | 5.328   |
| gnl UG Ssc#S18304172 | blue          | 871.7699 | 251.877 | 0.988024 | 0.00157  | 8.812   |
| gnl UG Ssc#S18333765 | purple        | 260.4747 | 20.2436 | -0.74686 | 0.146943 | 1.138   |
| gnl UG Ssc#S18336060 | darkgrey      | 68.1998  | 7.8918  | 0.635024 | 0.249686 | 0.67    |
| gnl UG Ssc#S18336254 | yellow        | 298.8297 | 115.885 | 0.992554 | 0.00077  | 1.42    |
| gnl UG Ssc#S18336569 | turquoise     | 736.866  | 231.879 | 0.943183 | 0.016118 | 11.206  |
| gnl UG Ssc#S18354030 | darkred       | 187.821  | 9.59585 | 0.616823 | 0.267758 | 4.18    |
| gnl UG Ssc#S18354494 | navy          | 128.1274 | 8.25411 | 0.27518  | 0.654104 | 56.628  |
| gnl UG Ssc#S18354763 | turquoise     | 896.1343 | 266.965 | 0.976668 | 0.004263 | 21.746  |
| gnl UG Ssc#S18354874 | brown         | 197.9743 | 50.5028 | 0.835617 | 0.078002 | 5.712   |
| gnl UG Ssc#S18355787 | purple        | 84.744   | 14.5713 | 0.657287 | 0.228053 | 23.736  |
| gnl UG Ssc#S18355850 | turquoise     | 669.6793 | 210.884 | 0.916027 | 0.02884  | 6.502   |
| gnl UG Ssc#S18355951 | blue          | 827.9331 | 223.094 | 0.956291 | 0.010897 | 24.92   |
| gnl UG Ssc#S18355973 | turquoise     | 583.1352 | 132.649 | 0.788175 | 0.113239 | 31.996  |
| gnl UG Ssc#S18355999 | turquoise     | 893.9754 | 262.763 | 0.982153 | 0.002854 | 4.446   |
| gnl UG Ssc#S18356219 | turquoise     | 351.0624 | 116.446 | 0.697459 | 0.190435 | 23.11   |
| gnl UG Ssc#S18356676 | greenyellow   | 169.762  | 45.7002 | 0.952389 | 0.012382 | 28.772  |
| gnl UG Ssc#S18357153 | violet        | 929.4696 | 74.6499 | 0.997668 | 0.000135 | 0.498   |
| gnl UG Ssc#S18357219 | grey60        | 886.565  | 60.0572 | 0.98754  | 0.001666 | 45.718  |
| gnl UG Ssc#S18357288 | turquoise     | 383.4067 | 103.256 | 0.696676 | 0.19115  | 12.592  |
| gnl UG Ssc#S18357398 | turquoise     | 369.8538 | 84.1206 | 0.62653  | 0.258077 | 23.834  |
| gnl UG Ssc#S18357511 | red           | 564.9343 | 103.625 | 0.985555 | 0.00208  | 34.46   |
| gnl UG Ssc#S18357580 | blue          | 722.027  | 213.924 | 0.950665 | 0.013057 | 21.964  |
| gnl UG Ssc#S18357620 | green         | 86.05447 | 38.3378 | 0.821151 | 0.088319 | 630.332 |
| gnl UG Ssc#S18357751 | turquoise     | 764.4816 | 244.047 | 0.931063 | 0.021502 | 14.624  |
| gnl UG Ssc#S18357775 | darkgrey      | 224.7232 | 27.7927 | 0.944331 | 0.015635 | 7.234   |
| gnl UG Ssc#S18358012 | yellow        | 303.1603 | 110.371 | 0.97775  | 0.003971 | 4.34    |
| gnl UG Ssc#S18358064 | turquoise     | 417.7681 | 139.662 | 0.780699 | 0.119142 | 35.672  |
| gnl UG Ssc#S18358279 | red           | 401.8535 | 93.7076 | 0.962638 | 0.00862  | 62.898  |
| gnl UG Ssc#S18358567 | skyblue       | 220.3673 | 31.5166 | 0.989849 | 0.001226 | 12.35   |
| gnl UG Ssc#S18358587 | lightgreen    | 302.3543 | 57.7872 | 0.987286 | 0.001718 | 13.642  |
| gnl UG Ssc#S18358692 | turquoise     | 518.8062 | 172.6   | 0.817811 | 0.090756 | 9.176   |
| gnl UG Ssc#S18358900 | violet        | 980.1531 | 74.6742 | 0.997748 | 0.000128 | 6.744   |
| gnl UG Ssc#S18358928 | black         | 991.6817 | 95.3336 | 0.990593 | 0.001094 | 15.158  |
| gnl UG Ssc#S18359073 | blue          | 963.1138 | 240.3   | 0.979298 | 0.003564 | 16.804  |
| gnl UG Ssc#S18359101 | darkturquoise | 199.308  | 25.3616 | 0.917153 | 0.028267 | 8.362   |
| gnl UG Ssc#S18359197 | red           | 563.8283 | 99.4294 | 0.975781 | 0.004508 | 6.744   |
| gnl UG Ssc#S18359204 | lightyellow   | 950.6844 | 63.2086 | 0.998954 | 4.06E-05 | 3.224   |
| gnl UG Ssc#S18359209 | paleturquoise | 155.291  | 11.1314 | 0.841414 | 0.073981 | 10.538  |
| gnl UG Ssc#S18359264 | brown         | 91.88646 | 35.2121 | 0.793165 | 0.109349 | 98.918  |

|                      |             |          |         |          |          |        |
|----------------------|-------------|----------|---------|----------|----------|--------|
| gnl UG Ssc#S18359557 | lightcyan   | 311.7514 | 41.4111 | 0.966128 | 0.007445 | 15.474 |
| gnl UG Ssc#S18359743 | lightyellow | 946.9477 | 62.8661 | 0.997881 | 0.000117 | 30.572 |
| gnl UG Ssc#S18359767 | darkgrey    | 193.3329 | 32.3187 | 0.978401 | 0.003798 | 15.848 |
| gnl UG Ssc#S18359803 | salmon      | 135.9792 | 40.5518 | 0.938443 | 0.018164 | 12.93  |
| gnl UG Ssc#S18360059 | turquoise   | 396.6564 | 122.202 | 0.731784 | 0.15987  | 12.222 |
| gnl UG Ssc#S18360480 | darkgreen   | 280.1374 | 38.1764 | 0.990444 | 0.00112  | 1.124  |
| gnl UG Ssc#S18360885 | turquoise   | 260.4145 | 60.6222 | 0.496878 | 0.394448 | 24.512 |
| gnl UG Ssc#S18361423 | turquoise   | 880.2748 | 266.279 | 0.974211 | 0.004952 | 4.634  |
| gnl UG Ssc#S18361485 | turquoise   | 297.441  | 99.0613 | 0.673389 | 0.212749 | 3.126  |
| gnl UG Ssc#S18377744 | darkred     | 275.6615 | 41.1021 | 0.976908 | 0.004198 | 2.502  |
| gnl UG Ssc#S18377876 | red         | 459.8331 | 106.64  | 0.991624 | 0.000919 | 8.6    |
| gnl UG Ssc#S18378149 | white       | 893.2035 | 28.6296 | 0.806632 | 0.09906  | 7.992  |
| gnl UG Ssc#S18378291 | black       | 807.5662 | 87.6834 | 0.974061 | 0.004995 | 5.108  |
| gnl UG Ssc#S18378422 | navy        | 163.7423 | 37.6232 | 0.976959 | 0.004184 | 20.408 |
| gnl UG Ssc#S18378552 | turquoise   | 754.6259 | 222.147 | 0.947347 | 0.014388 | 39.192 |
| gnl UG Ssc#S18378606 | blue        | 732.271  | 215.832 | 0.947918 | 0.014156 | 49.004 |
| gnl UG Ssc#S18378680 | green       | 107.994  | 47.6875 | 0.910667 | 0.031619 | 40.67  |
| gnl UG Ssc#S18378791 | greenyellow | 142.6443 | 42.5614 | 0.935458 | 0.019492 | 42.8   |
| gnl UG Ssc#S18378792 | blue        | 893.6351 | 214.278 | 0.951964 | 0.012547 | 15.496 |
| gnl UG Ssc#S18378854 | pink        | 221.6615 | 59.2509 | 0.931333 | 0.021376 | 23.87  |
| gnl UG Ssc#S18378957 | grey        | 162.8082 | 12.8034 | -0.92922 | 0.022363 | 10.206 |
| gnl UG Ssc#S18378982 | navy        | 194.0409 | 33.3066 | 0.850321 | 0.067932 | 3.902  |
| gnl UG Ssc#S18378997 | grey60      | 799.3383 | 57.0125 | 0.976964 | 0.004183 | 12.886 |
| gnl UG Ssc#S18379057 | yellowgreen | 137.3702 | 11.7671 | 0.890422 | 0.04282  | 36.324 |
| gnl UG Ssc#S18379095 | lightyellow | 984.9663 | 62.4852 | 0.996581 | 0.00024  | 7.77   |
| gnl UG Ssc#S18379108 | yellow      | 309.3732 | 118.735 | 0.997001 | 0.000197 | 24.764 |
| gnl UG Ssc#S18379116 | grey        | 162.6458 | 14.3056 | -0.98248 | 0.002777 | 50.834 |
| gnl UG Ssc#S18379252 | darkgrey    | 183.2305 | 34.8645 | 0.997113 | 0.000186 | 18.426 |
| gnl UG Ssc#S18379332 | navy        | 154.8084 | 38.3006 | 0.968705 | 0.006615 | 27.31  |
| gnl UG Ssc#S18379352 | blue        | 763.4744 | 229.029 | 0.966319 | 0.007383 | 0.666  |
| gnl UG Ssc#S18379413 | purple      | 142.1595 | 8.95021 | 0.631173 | 0.253481 | 11.874 |
| gnl UG Ssc#S18379594 | brown       | 197.3827 | 57.0179 | 0.80107  | 0.103271 | 5.296  |
| gnl UG Ssc#S18379751 | blue        | 438.9467 | 124.776 | 0.827283 | 0.083898 | 7.968  |
| gnl UG Ssc#S18379761 | turquoise   | 452.4503 | 130.735 | 0.774293 | 0.124271 | 3.1    |
| gnl UG Ssc#S18380107 | orange      | 572.589  | 32.9568 | 0.98225  | 0.002831 | 91.478 |
| gnl UG Ssc#S18380485 | red         | 657.9769 | 102.813 | 0.983227 | 0.002601 | 23.76  |
| gnl UG Ssc#S18380508 | grey60      | 950.6862 | 63.4941 | 0.998899 | 4.39E-05 | 2.378  |
| gnl UG Ssc#S18380537 | turquoise   | 559.3768 | 167.475 | 0.846234 | 0.070688 | 34.314 |
| gnl UG Ssc#S18380653 | pink        | 320.3631 | 43.6335 | 0.825981 | 0.084831 | 28.76  |
| gnl UG Ssc#S18380710 | tan         | 937.0602 | 67.9092 | 0.995936 | 0.000311 | 26.54  |
| gnl UG Ssc#S18380942 | darkgreen   | 286.7867 | 35.7481 | 0.975384 | 0.004619 | 8.632  |
| gnl UG Ssc#S18381258 | darkgrey    | 191.7128 | 34.3454 | 0.992336 | 0.000804 | 18.348 |
| gnl UG Ssc#S18381264 | salmon      | 275.384  | 34.7837 | 0.894185 | 0.040658 | 0.654  |
| gnl UG Ssc#S18381418 | darkgreen   | 242.8586 | 18.7037 | 0.780961 | 0.118934 | 2.068  |
| gnl UG Ssc#S18381432 | turquoise   | 141.1409 | 36.6245 | 0.462705 | 0.432621 | 21.414 |
| gnl UG Ssc#S18381627 | lightgreen  | 283.8522 | 60.4054 | 0.99641  | 0.000258 | 0.102  |
| gnl UG Ssc#S18382551 | red         | 426.653  | 77.6273 | 0.924527 | 0.024606 | 14.42  |
| gnl UG Ssc#S18382627 | turquoise   | 829.793  | 251.693 | 0.952816 | 0.012216 | 13.994 |

|                      |               |          |         |          |          |         |
|----------------------|---------------|----------|---------|----------|----------|---------|
| gnl UG Ssc#S18382640 | sienna3       | 958.9575 | 25.975  | 0.998888 | 4.45E-05 | 18.52   |
| gnl UG Ssc#S18383248 | turquoise     | 461.2249 | 125.909 | 0.750051 | 0.14425  | 108.706 |
| gnl UG Ssc#S18383312 | turquoise     | 512.1469 | 153.493 | 0.802685 | 0.102043 | 11.928  |
| gnl UG Ssc#S18383420 | violet        | 988.3523 | 74.7533 | 0.997947 | 0.000112 | 37.492  |
| gnl UG Ssc#S18383442 | midnightblue  | 182.2926 | 43.3666 | 0.980213 | 0.003331 | 23.56   |
| gnl UG Ssc#S18383451 | pink          | 94.31265 | 13.8325 | 0.13351  | 0.830516 | 24.168  |
| gnl UG Ssc#S18383491 | black         | 843.1529 | 88.5942 | 0.976576 | 0.004288 | 31.506  |
| gnl UG Ssc#S18383636 | violet        | 905.9396 | 73.5922 | 0.994767 | 0.000454 | 2.684   |
| gnl UG Ssc#S18383637 | red           | 605.8954 | 103.143 | 0.983653 | 0.002503 | 29.272  |
| gnl UG Ssc#S18383839 | darkgreen     | 198.4645 | 30.0007 | 0.917753 | 0.027963 | 12.324  |
| gnl UG Ssc#S18383932 | turquoise     | 822.1569 | 260.295 | 0.960858 | 0.009241 | 103.854 |
| gnl UG Ssc#S18384163 | lightgreen    | 291.4019 | 57.6429 | 0.986901 | 0.001796 | 7.628   |
| gnl UG Ssc#S18384305 | lightcyan     | 288.2271 | 39.7599 | 0.977534 | 0.004029 | 14.738  |
| gnl UG Ssc#S18384469 | blue          | 650.8482 | 195.988 | 0.931557 | 0.021273 | 8.024   |
| gnl UG Ssc#S18384885 | midnightblue  | 117.911  | 37.4009 | 0.940452 | 0.017287 | 18.288  |
| gnl UG Ssc#S18385915 | darkred       | 265.4921 | 43.0857 | 0.987415 | 0.001692 | 0.558   |
| gnl UG Ssc#S18386342 | darkmagenta   | 987.1657 | 27.1977 | 0.995337 | 0.000382 | 1.27    |
| gnl UG Ssc#S18386541 | purple        | 65.01541 | 10.7553 | 0.569637 | 0.316114 | 24.638  |
| gnl UG Ssc#S18386569 | lightyellow   | 867.1263 | 60.4077 | 0.989797 | 0.001235 | 1.81    |
| gnl UG Ssc#S18387078 | red           | 601.1383 | 107.319 | 0.992532 | 0.000774 | 31.366  |
| gnl UG Ssc#S18387120 | green         | 135.9789 | 54.5121 | 0.96551  | 0.007649 | 14.236  |
| gnl UG Ssc#S18387223 | blue          | 864.6217 | 242.641 | 0.980152 | 0.003347 | 24.646  |
| gnl UG Ssc#S18387292 | turquoise     | 833.421  | 232.136 | 0.941727 | 0.016738 | 23.152  |
| gnl UG Ssc#S18387383 | royalblue     | 364.8971 | 33.1158 | 0.996384 | 0.000261 | 13.636  |
| gnl UG Ssc#S18387501 | royalblue     | 289.8343 | 19.0302 | 0.838545 | 0.075963 | 21.244  |
| gnl UG Ssc#S18387558 | black         | 993.3782 | 94.7125 | 0.989281 | 0.00133  | 24.012  |
| gnl UG Ssc#S18387565 | lightyellow   | 898.9128 | 61.1934 | 0.99246  | 0.000785 | 3.808   |
| gnl UG Ssc#S18387589 | darkturquoise | 177.0703 | 24.505  | 0.90903  | 0.032484 | 21.444  |
| gnl UG Ssc#S18387708 | green         | 98.59889 | 44.6785 | 0.880107 | 0.048928 | 69.906  |
| gnl UG Ssc#S18387783 | yellow        | 152.9945 | 40.3464 | 0.756223 | 0.139081 | 36.756  |
| gnl UG Ssc#S18546005 | turquoise     | 770.4959 | 238.006 | 0.942292 | 0.016496 | 46.706  |
| gnl UG Ssc#S18546038 | darkgrey      | 94.07013 | 10.7004 | 0.729197 | 0.162119 | 11.32   |
| gnl UG Ssc#S18546074 | red           | 750.6959 | 79.3313 | 0.925022 | 0.024366 | 18.394  |
| gnl UG Ssc#S18546081 | paleturquoise | 134.0411 | 13.5711 | 0.863767 | 0.059112 | 16.196  |
| gnl UG Ssc#S18546149 | turquoise     | 469.2935 | 155.45  | 0.790903 | 0.111107 | 64.536  |
| gnl UG Ssc#S18546387 | lightgreen    | 287.6626 | 55.1334 | 0.977934 | 0.003922 | 13.354  |
| gnl UG Ssc#S18546390 | skyblue       | 293.8636 | 30.5254 | 0.980927 | 0.003153 | 150.048 |
| gnl UG Ssc#S18546426 | yellow        | 238.9237 | 87.3779 | 0.920423 | 0.026623 | 26.734  |
| gnl UG Ssc#S18546477 | navy          | 114.6704 | 8.94061 | -0.12111 | 0.846181 | 53.422  |
| gnl UG Ssc#S18546502 | turquoise     | 328.4631 | 83.1585 | 0.597318 | 0.287492 | 7.594   |
| gnl UG Ssc#S18546597 | yellow        | 288.3365 | 110.262 | 0.977639 | 0.004    | 1.68    |
| gnl UG Ssc#S18546698 | magenta       | 243.345  | 78.8523 | 0.990428 | 0.001123 | 2.286   |
| gnl UG Ssc#S18546855 | green         | 116.9576 | 61.5978 | 0.994295 | 0.000517 | 19.572  |
| gnl UG Ssc#S18546948 | turquoise     | 598.8568 | 181.26  | 0.871057 | 0.054494 | 5.096   |
| gnl UG Ssc#S18546984 | black         | 944.0516 | 97.9442 | 0.996992 | 0.000198 | 3.692   |
| gnl UG Ssc#S18547064 | sienna3       | 819.1681 | 23.5621 | 0.979497 | 0.003513 | 6.578   |
| gnl UG Ssc#S18547312 | purple        | 197.4655 | 10.9576 | 0.626092 | 0.258512 | 15.336  |
| gnl UG Ssc#S18547360 | red           | 517.9412 | 100.679 | 0.978627 | 0.003739 | 15.772  |

|                      |              |          |         |          |          |         |
|----------------------|--------------|----------|---------|----------|----------|---------|
| gnl UG Ssc#S18547454 | violet       | 949.7404 | 74.7797 | 0.998046 | 0.000104 | 7.356   |
| gnl UG Ssc#S18547573 | pink         | 107.0283 | 11.8027 | 0.141095 | 0.820951 | 332.742 |
| gnl UG Ssc#S18547696 | turquoise    | 808.7314 | 255.12  | 0.963338 | 0.00838  | 6.44    |
| gnl UG Ssc#S18547766 | royalblue    | 396.2378 | 19.9733 | 0.848266 | 0.069313 | 41.924  |
| gnl UG Ssc#S18547863 | turquoise    | 559.5251 | 177.763 | 0.873487 | 0.052981 | 9.156   |
| gnl UG Ssc#S18548324 | brown        | 92.20627 | 31.7019 | 0.733907 | 0.15803  | 9.354   |
| gnl UG Ssc#S18548354 | darkgreen    | 294.6737 | 36.9226 | 0.988315 | 0.001514 | 9.722   |
| gnl UG Ssc#S18548531 | red          | 244.7847 | 50.3855 | 0.834315 | 0.078915 | 15.136  |
| gnl UG Ssc#S18548560 | lightcyan    | 292.5301 | 40.6791 | 0.976926 | 0.004193 | 8.022   |
| gnl UG Ssc#S18548647 | sienna3      | 927.5429 | 23.1195 | 0.976321 | 0.004358 | 2.134   |
| gnl UG Ssc#S18548799 | blue         | 773.6066 | 226.716 | 0.966402 | 0.007355 | 8.118   |
| gnl UG Ssc#S18548805 | brown        | 68.37851 | 28.1158 | 0.675186 | 0.211059 | 1.8     |
| gnl UG Ssc#S18548934 | violet       | 985.702  | 73.0841 | 0.993358 | 0.000649 | 20.852  |
| gnl UG Ssc#S18548948 | black        | 976.4059 | 97.086  | 0.994589 | 0.000477 | 22.194  |
| gnl UG Ssc#S18549036 | salmon       | 134.0516 | 30.1286 | 0.86282  | 0.059721 | 76.57   |
| gnl UG Ssc#S18549168 | red          | 394.0179 | 93.6763 | 0.962616 | 0.008628 | 21.986  |
| gnl UG Ssc#S18549184 | yellow       | 296.6987 | 103.649 | 0.963945 | 0.008174 | 16.618  |
| gnl UG Ssc#S18549395 | grey60       | 983.4183 | 59.2431 | 0.984682 | 0.002271 | 24.074  |
| gnl UG Ssc#S18549494 | grey60       | 814.7957 | 56.7435 | 0.976013 | 0.004444 | 9.968   |
| gnl UG Ssc#S18549536 | blue         | 878.346  | 213.929 | 0.948186 | 0.014047 | 56.118  |
| gnl UG Ssc#S18549559 | darkgrey     | 184.0671 | 32.7263 | 0.978475 | 0.003779 | 3.018   |
| gnl UG Ssc#S18549601 | darkred      | 193.811  | 38.5589 | 0.948921 | 0.013751 | 12.412  |
| gnl UG Ssc#S18549808 | greenyellow  | 205.3859 | 43.3462 | 0.938606 | 0.018092 | 19.266  |
| gnl UG Ssc#S18549874 | brown        | 95.49676 | 27.6769 | 0.486787 | 0.405635 | 2.6     |
| gnl UG Ssc#S18549905 | royalblue    | 339.7433 | 32.79   | 0.993851 | 0.000578 | 104.604 |
| gnl UG Ssc#S18550002 | navy         | 140.6198 | 10.9061 | -0.33746 | 0.578628 | 18.318  |
| gnl UG Ssc#S18550089 | navy         | 169.671  | 37.9982 | 0.982832 | 0.002693 | 1.926   |
| gnl UG Ssc#S18550098 | violet       | 961.2466 | 74.4906 | 0.997268 | 0.000171 | 9.134   |
| gnl UG Ssc#S18550130 | pink         | 234.2335 | 68.6194 | 0.978113 | 0.003874 | 12.304  |
| gnl UG Ssc#S18550180 | blue         | 826.549  | 236.164 | 0.971496 | 0.005752 | 25.85   |
| gnl UG Ssc#S18550687 | grey60       | 846.7707 | 59.2221 | 0.984674 | 0.002272 | 8.148   |
| gnl UG Ssc#S18550712 | yellow       | 234.5795 | 82.1042 | 0.906126 | 0.034036 | 2.96    |
| gnl UG Ssc#S18550902 | royalblue    | 245.24   | 13.9779 | 0.731595 | 0.160034 | 181.758 |
| gnl UG Ssc#S18551086 | midnightblue | 172.7196 | 39.5112 | 0.955931 | 0.011032 | 33.116  |
| gnl UG Ssc#S18551209 | purple       | 101.8594 | 17.6117 | 0.922644 | 0.025525 | 80.582  |
| gnl UG Ssc#S18551494 | turquoise    | 327.6987 | 111.06  | 0.700429 | 0.187731 | 33.23   |
| gnl UG Ssc#S18551520 | turquoise    | 599.5595 | 163.458 | 0.841551 | 0.073887 | 16.364  |
| gnl UG Ssc#S18551559 | darkorange   | 141.3796 | 18.7403 | 0.940974 | 0.017061 | 15.732  |
| gnl UG Ssc#S18551571 | white        | 963.935  | 29.2783 | 0.783024 | 0.117296 | 32.174  |
| gnl UG Ssc#S18551577 | turquoise    | 414.7022 | 99.4407 | 0.680723 | 0.205876 | 21.7    |
| gnl UG Ssc#S18551614 | blue         | 669.5185 | 200.435 | 0.934373 | 0.019982 | 3.012   |
| gnl UG Ssc#S18551801 | blue         | 721.9669 | 151.624 | 0.8739   | 0.052725 | 38.31   |
| gnl UG Ssc#S18551834 | lightcyan    | 169.9639 | 11.7819 | 0.412337 | 0.490278 | 72.948  |
| gnl UG Ssc#S18551845 | darkgreen    | 234.3204 | 34.4155 | 0.944819 | 0.015431 | 80.856  |
| gnl UG Ssc#S18552012 | turquoise    | 825.0018 | 257.286 | 0.959166 | 0.009844 | 132.252 |
| gnl UG Ssc#S18552237 | tan          | 951.4667 | 58.3595 | 0.962376 | 0.008711 | 12.518  |
| gnl UG Ssc#S18552312 | turquoise    | 586.164  | 188.948 | 0.859988 | 0.061552 | 21.55   |
| gnl UG Ssc#S18552383 | green        | 99.85963 | 42.8939 | 0.880721 | 0.048557 | 86.874  |

|                      |               |          |         |          |          |         |
|----------------------|---------------|----------|---------|----------|----------|---------|
| gnl UG Ssc#S18552404 | royalblue     | 79.01556 | 5.79651 | 0.50725  | 0.383027 | 3.704   |
| gnl UG Ssc#S18552570 | magenta       | 209.63   | 65.3142 | 0.95019  | 0.013245 | 51.11   |
| gnl UG Ssc#S18552999 | royalblue     | 322.0176 | 32.0198 | 0.976265 | 0.004374 | 11.504  |
| gnl UG Ssc#S18553035 | grey          | 118.9086 | 12.0254 | 0.215452 | 0.727815 | 218.518 |
| gnl UG Ssc#S18553137 | black         | 965.4168 | 96.0627 | 0.992317 | 0.000807 | 43.786  |
| gnl UG Ssc#S18553158 | green         | 102.3188 | 60.1571 | 0.981013 | 0.003132 | 23.916  |
| gnl UG Ssc#S18553245 | red           | 488.5785 | 103.706 | 0.985829 | 0.002021 | 29.382  |
| gnl UG Ssc#S18553368 | grey60        | 976.3111 | 61.6157 | 0.99264  | 0.000757 | 16.28   |
| gnl UG Ssc#S18553403 | brown         | 90.90621 | 29.3768 | 0.671206 | 0.214806 | 618.788 |
| gnl UG Ssc#S18553581 | paleturquoise | 132.3322 | 11.588  | 0.849444 | 0.06852  | 63.384  |
| gnl UG Ssc#S18553619 | darkgreen     | 226.6815 | 25.8276 | 0.888135 | 0.044152 | 8.942   |
| gnl UG Ssc#S18553622 | green         | 105.0512 | 49.0274 | 0.920111 | 0.026779 | 14.246  |
| gnl UG Ssc#S18553623 | salmon        | 353.781  | 39.9293 | 0.928323 | 0.022787 | 14.902  |
| gnl UG Ssc#S18553702 | grey          | 129.1486 | 12.6525 | 0.177797 | 0.77482  | 22.054  |
| gnl UG Ssc#S18553815 | white         | 977.0609 | 29.1928 | 0.78465  | 0.116011 | 4.736   |
| gnl UG Ssc#S18553939 | green         | 115.1755 | 55.6586 | 0.961507 | 0.009013 | 12.45   |
| gnl UG Ssc#S18554195 | greenyellow   | 185.2435 | 54.2349 | 0.994223 | 0.000527 | 308.552 |
| gnl UG Ssc#S18554238 | white         | 166.2236 | 6.73817 | 0.156244 | 0.801876 | 5.568   |
| gnl UG Ssc#S18554366 | darkmagenta   | 955.2059 | 25.0476 | 0.979201 | 0.003589 | 34.182  |
| gnl UG Ssc#S18554454 | green         | 130.6305 | 46.5966 | 0.903945 | 0.035217 | 4.18    |
| gnl UG Ssc#S18554465 | brown         | 82.45    | 10.5786 | 0.296623 | 0.627942 | 5.686   |
| gnl UG Ssc#S18554486 | black         | 926.7492 | 84.5146 | 0.966971 | 0.00717  | 12.986  |
| gnl UG Ssc#S18554583 | lightyellow   | 975.8028 | 63.1985 | 0.998896 | 4.40E-05 | 2.946   |
| gnl UG Ssc#S18554602 | magenta       | 239.8905 | 78.0934 | 0.988286 | 0.001519 | 7.222   |
| gnl UG Ssc#S18554787 | blue          | 568.1623 | 149.041 | 0.86385  | 0.059059 | 48.414  |
| gnl UG Ssc#S18554865 | red           | 637.3923 | 105.657 | 0.988864 | 0.001408 | 14.896  |
| gnl UG Ssc#S18554887 | black         | 955.2536 | 91.934  | 0.983564 | 0.002523 | 45.992  |
| gnl UG Ssc#S18554897 | magenta       | 280.662  | 74.6697 | 0.977598 | 0.004012 | 13.41   |
| gnl UG Ssc#S18555004 | magenta       | 292.8363 | 56.8223 | 0.91683  | 0.028431 | 42.864  |
| gnl UG Ssc#S18555055 | blue          | 735.1158 | 217.975 | 0.95272  | 0.012253 | 18.742  |
| gnl UG Ssc#S18555062 | turquoise     | 583.0594 | 168.407 | 0.855265 | 0.064645 | 19.518  |
| gnl UG Ssc#S18555355 | navy          | 95.08432 | 20.1863 | 0.71078  | 0.178392 | 10.636  |
| gnl UG Ssc#S18555410 | violet        | 963.5711 | 74.1334 | 0.996298 | 0.00027  | 14.88   |
| gnl UG Ssc#S18555414 | green         | 71.39997 | 36.7045 | 0.821001 | 0.088429 | 912.106 |
| gnl UG Ssc#S18555551 | lightyellow   | 911.8356 | 61.7647 | 0.994333 | 0.000512 | 24.158  |
| gnl UG Ssc#S18555613 | pink          | 179.8811 | 3.25217 | -0.90768 | 0.033202 | 11.806  |
| gnl UG Ssc#S18555897 | green         | 89.552   | 37.991  | 0.853844 | 0.065584 | 32.752  |
| gnl UG Ssc#S18555925 | darkorange    | 152.5312 | 21.3739 | 0.952245 | 0.012437 | 11.604  |
| gnl UG Ssc#S18556194 | purple        | 191.0077 | 13.7399 | 0.750801 | 0.143619 | 21.332  |
| gnl UG Ssc#S18556295 | blue          | 810.3295 | 193.318 | 0.929342 | 0.022306 | 28.616  |
| gnl UG Ssc#S18556436 | darkgrey      | 70.28362 | 10.2449 | 0.696678 | 0.191148 | 0.766   |
| gnl UG Ssc#S18556442 | blue          | 894.6769 | 254.512 | 0.990759 | 0.001065 | 8.26    |
| gnl UG Ssc#S18556589 | pink          | 77.37907 | 21.1891 | 0.502786 | 0.387934 | 41.098  |
| gnl UG Ssc#S18556801 | lightcyan     | 243.9604 | 34.1925 | 0.94569  | 0.015069 | 11.898  |
| gnl UG Ssc#S18556879 | violet        | 849.7476 | 69.0774 | 0.982028 | 0.002884 | 4.122   |
| gnl UG Ssc#S18556951 | navy          | 173.5157 | 38.6885 | 0.923099 | 0.025302 | 57.762  |
| gnl UG Ssc#S18557192 | green         | 88.4385  | 46.6218 | 0.899574 | 0.037622 | 6.188   |
| gnl UG Ssc#S18557422 | turquoise     | 844.9153 | 253.833 | 0.971535 | 0.00574  | 14.998  |

|                      |               |          |         |          |          |        |
|----------------------|---------------|----------|---------|----------|----------|--------|
| gnl UG Ssc#S18557470 | orange        | 278.9282 | 29.6274 | 0.960506 | 0.009366 | 25.64  |
| gnl UG Ssc#S18557502 | salmon        | 153.0231 | 36.0496 | 0.904931 | 0.034682 | 10.8   |
| gnl UG Ssc#S18557542 | turquoise     | 413.0407 | 134.626 | 0.774534 | 0.124077 | 20.438 |
| gnl UG Ssc#S18557598 | darkred       | 229.7074 | 35.8196 | 0.938513 | 0.018133 | 14.456 |
| gnl UG Ssc#S18557699 | red           | 360.5164 | 85.557  | 0.944172 | 0.015702 | 21.374 |
| gnl UG Ssc#S18557771 | yellow        | 91.20733 | 22.6554 | 0.609335 | 0.27529  | 0.898  |
| gnl UG Ssc#S18557837 | pink          | 275.8293 | 50.0852 | 0.865536 | 0.057981 | 31.122 |
| gnl UG Ssc#S18557900 | blue          | 799.884  | 206.56  | 0.937942 | 0.018384 | 15.432 |
| gnl UG Ssc#S18557979 | greenyellow   | 181.6502 | 44.7307 | 0.941904 | 0.016662 | 9.804  |
| gnl UG Ssc#S18557981 | turquoise     | 209.9876 | 48.1607 | 0.432855 | 0.466602 | 6.652  |
| gnl UG Ssc#S18558242 | tan           | 898.5837 | 65.9559 | 0.989906 | 0.001215 | 3.58   |
| gnl UG Ssc#S18558291 | black         | 993.7929 | 95.5444 | 0.991096 | 0.001007 | 23.4   |
| gnl UG Ssc#S18558299 | turquoise     | 834.806  | 247.448 | 0.948688 | 0.013845 | 30.302 |
| gnl UG Ssc#S19537170 | lightgreen    | 306.2589 | 58.9964 | 0.991574 | 0.000927 | 58.408 |
| gnl UG Ssc#S19537267 | green         | 131.8557 | 42.6148 | 0.872991 | 0.053289 | 2.058  |
| gnl UG Ssc#S19537684 | lightgreen    | 274.1379 | 58.7991 | 0.99097  | 0.001029 | 1.528  |
| gnl UG Ssc#S19537979 | darkturquoise | 144.817  | 24.9167 | 0.911116 | 0.031383 | 9.648  |
| gnl UG Ssc#S19538858 | red           | 434.8519 | 87.085  | 0.948091 | 0.014086 | 2.716  |
| gnl UG Ssc#S19538970 | darkmagenta   | 928.7831 | 25.633  | 0.983422 | 0.002556 | 18.712 |
| gnl UG Ssc#S19538990 | violet        | 964.4406 | 72.6947 | 0.992451 | 0.000786 | 6.77   |
| gnl UG Ssc#S19539315 | pink          | 160.228  | 42.02   | 0.880226 | 0.048856 | 14.282 |
| gnl UG Ssc#S19539468 | skyblue       | 292.2413 | 27.5572 | 0.960036 | 0.009533 | 23.276 |
| gnl UG Ssc#S19539494 | yellow        | 296.36   | 112.565 | 0.982408 | 0.002794 | 4.806  |
| gnl UG Ssc#S19539620 | white         | 163.4524 | 22.8151 | 0.803207 | 0.101647 | 48.264 |
| gnl UG Ssc#S19539691 | tan           | 963.8645 | 63.1134 | 0.978608 | 0.003744 | 16.204 |
| gnl UG Ssc#S19539740 | black         | 978.2566 | 96.8874 | 0.993946 | 0.000565 | 19.508 |
| gnl UG Ssc#S19540060 | white         | 144.3717 | 6.35999 | 0.18986  | 0.759722 | 6.394  |
| gnl UG Ssc#S19540140 | lightyellow   | 998.8763 | 60.8206 | 0.991054 | 0.001014 | 1.902  |
| gnl UG Ssc#S19540267 | orange        | 544.8084 | 31.5764 | 0.971464 | 0.005762 | 7.918  |
| gnl UG Ssc#S19540289 | turquoise     | 831.5058 | 241.139 | 0.944847 | 0.015419 | 1.656  |
| gnl UG Ssc#S19540314 | navy          | 217.3687 | 28.0626 | 0.779818 | 0.119844 | 27.37  |
| gnl UG Ssc#S19540375 | turquoise     | 615.0864 | 196.225 | 0.873827 | 0.05277  | 32.394 |
| gnl UG Ssc#S19540378 | orange        | 303.919  | 32.4725 | 0.978354 | 0.00381  | 11.562 |
| gnl UG Ssc#S19540384 | darkturquoise | 176.6825 | 31.8853 | 0.974108 | 0.004982 | 9.94   |
| gnl UG Ssc#S19540409 | violet        | 894.5835 | 72.3226 | 0.99127  | 0.000978 | 9.166  |
| gnl UG Ssc#S19540410 | tan           | 698.027  | 54.1327 | 0.948441 | 0.013944 | 48.094 |
| gnl UG Ssc#S19540415 | navy          | 303.8978 | 29.5891 | 0.806515 | 0.099147 | 8.334  |
| gnl UG Ssc#S19540417 | lightyellow   | 895.9311 | 61.7731 | 0.994297 | 0.000517 | 2.808  |
| gnl UG Ssc#S19540505 | lightcyan     | 299.9883 | 37.2399 | 0.949562 | 0.013495 | 35.886 |
| gnl UG Ssc#S19540539 | green         | 116.4731 | 56.0632 | 0.967929 | 0.006861 | 33.284 |
| gnl UG Ssc#S19540632 | lightyellow   | 946.9244 | 63.2833 | 0.999186 | 2.79E-05 | 3.548  |
| gnl UG Ssc#S19540688 | yellowgreen   | 171.0778 | 16.1078 | 0.962474 | 0.008677 | 32.604 |
| gnl UG Ssc#S19540774 | brown         | 213.7858 | 54.3365 | 0.836321 | 0.077511 | 23.824 |
| gnl UG Ssc#S19540934 | turquoise     | 733.3321 | 217.023 | 0.932763 | 0.020716 | 25.394 |
| gnl UG Ssc#S19541050 | grey          | 206.1836 | 11.7832 | 0.178598 | 0.773816 | 19.186 |
| gnl UG Ssc#S19541067 | pink          | 82.52837 | 17.414  | 0.278204 | 0.650404 | 34.598 |
| gnl UG Ssc#S19541084 | turquoise     | 256.926  | 71.5255 | 0.550599 | 0.336194 | 90.124 |
| gnl UG Ssc#S19541103 | turquoise     | 334.6318 | 111.511 | 0.746501 | 0.147249 | 22.354 |



|                      |             |          |         |          |          |         |
|----------------------|-------------|----------|---------|----------|----------|---------|
| gnl UG Ssc#S19541153 | darkgreen   | 258.1029 | 37.573  | 0.977873 | 0.003938 | 10.138  |
| gnl UG Ssc#S19541498 | darkgrey    | 174.0963 | 29.5798 | 0.9596   | 0.009689 | 24.26   |
| gnl UG Ssc#S19541523 | blue        | 708.0574 | 197.8   | 0.92731  | 0.023267 | 53.744  |
| gnl UG Ssc#S19541571 | yellow      | 154.1891 | 48.8143 | 0.777971 | 0.121319 | 11.452  |
| gnl UG Ssc#S19541572 | lightcyan   | 230.7107 | 33.1105 | 0.904518 | 0.034906 | 13.154  |
| gnl UG Ssc#S19541579 | royalblue   | 221.5106 | 25.2071 | 0.89396  | 0.040785 | 50.544  |
| gnl UG Ssc#S19541658 | brown       | 158.6032 | 54.0683 | 0.945966 | 0.014955 | 14.732  |
| gnl UG Ssc#S19541728 | turquoise   | 231.8953 | 56.428  | 0.481096 | 0.411976 | 25.098  |
| gnl UG Ssc#S19541992 | greenyellow | 166.3536 | 45.5277 | 0.9506   | 0.013082 | 14.336  |
| gnl UG Ssc#S19542004 | turquoise   | 821.7081 | 232.64  | 0.938628 | 0.018082 | 67.742  |
| gnl UG Ssc#S19542017 | turquoise   | 247.7    | 54.5636 | 0.488551 | 0.403674 | 41.2    |
| gnl UG Ssc#S19542031 | darkorange  | 137.6279 | 20.5945 | 0.95732  | 0.010517 | 145.856 |
| gnl UG Ssc#S19542061 | turquoise   | 844.6342 | 258.137 | 0.9578   | 0.01034  | 36.216  |
| gnl UG Ssc#S19542087 | navy        | 142.6213 | 42.3919 | 0.963443 | 0.008345 | 23.736  |
| gnl UG Ssc#S19542100 | pink        | 168.0812 | 47.9628 | 0.901575 | 0.036515 | 7.59    |
| gnl UG Ssc#S19542226 | red         | 370.854  | 92.244  | 0.960202 | 0.009474 | 30.29   |
| gnl UG Ssc#S19542246 | royalblue   | 324.0889 | 32.1721 | 0.983762 | 0.002478 | 4.182   |
| gnl UG Ssc#S19542298 | turquoise   | 882.9399 | 266.553 | 0.978866 | 0.003677 | 19.516  |
| gnl UG Ssc#S19542511 | pink        | 279.8728 | 74.1779 | 0.983874 | 0.002452 | 5.162   |
| gnl UG Ssc#S19542514 | tan         | 957.0508 | 68.6506 | 0.998039 | 0.000104 | 8.738   |
| gnl UG Ssc#S19542525 | green       | 59.87254 | 24.7635 | 0.674687 | 0.211527 | 150.736 |
| gnl UG Ssc#S19542622 | turquoise   | 635.8978 | 163.99  | 0.853326 | 0.065928 | 36.402  |
| gnl UG Ssc#S19542649 | turquoise   | 625.0719 | 172.18  | 0.875295 | 0.051864 | 16.04   |
| gnl UG Ssc#S19542654 | turquoise   | 645.0077 | 203.114 | 0.917832 | 0.027923 | 10.512  |
| gnl UG Ssc#S19542684 | turquoise   | 466.6621 | 146.365 | 0.797164 | 0.106262 | 78.514  |
| gnl UG Ssc#S19542699 | black       | 978.5669 | 98.5275 | 0.997714 | 0.000131 | 17.786  |
| gnl UG Ssc#S19542749 | navy        | 145.2266 | 44.628  | 0.978407 | 0.003797 | 109.508 |
| gnl UG Ssc#S19542862 | turquoise   | 340.2332 | 94.9911 | 0.642522 | 0.242341 | 16.686  |
| gnl UG Ssc#S19543319 | turquoise   | 845.0414 | 257.776 | 0.974161 | 0.004967 | 14.688  |
| gnl UG Ssc#S19543409 | lightgreen  | 253.7809 | 53.726  | 0.972661 | 0.005404 | 8.634   |
| gnl UG Ssc#S19543418 | blue        | 613.8957 | 151.651 | 0.872117 | 0.053832 | 27.47   |
| gnl UG Ssc#S19543452 | yellow      | 310.2227 | 118.836 | 0.997589 | 0.000142 | 3.77    |
| gnl UG Ssc#S19543565 | black       | 981.349  | 94.5542 | 0.988761 | 0.001428 | 10.178  |
| gnl UG Ssc#S19544231 | yellow      | 272.2626 | 100.139 | 0.959735 | 0.00964  | 8.608   |
| gnl UG Ssc#S19545362 | blue        | 741.1663 | 224.753 | 0.96024  | 0.00946  | 65.956  |
| gnl UG Ssc#S19545397 | yellow      | 274.1111 | 89.5968 | 0.930153 | 0.021926 | 546.526 |
| gnl UG Ssc#S19545412 | lightcyan   | 302.7954 | 42.9313 | 0.982006 | 0.00289  | 6.862   |
| gnl UG Ssc#S19545451 | green       | 81.6267  | 38.91   | 0.828169 | 0.083265 | 30.252  |
| gnl UG Ssc#S19545467 | blue        | 900.8557 | 230.881 | 0.966874 | 0.007202 | 35.938  |
| gnl UG Ssc#S19545641 | yellowgreen | 177.3021 | 17.293  | 0.975274 | 0.00465  | 6.862   |
| gnl UG Ssc#S19545786 | turquoise   | 686.0152 | 224.375 | 0.899487 | 0.037671 | 13.874  |
| gnl UG Ssc#S19545977 | blue        | 594.6735 | 179.708 | 0.905769 | 0.034229 | 77.626  |
| gnl UG Ssc#S19546005 | lightyellow | 989.5253 | 62.4002 | 0.996328 | 0.000267 | 9.964   |
| gnl UG Ssc#S19546024 | tan         | 960.8541 | 68.5004 | 0.99724  | 0.000174 | 42.928  |
| gnl UG Ssc#S19546046 | red         | 302.9114 | 73.2572 | 0.909929 | 0.032008 | 6.092   |
| gnl UG Ssc#S19546062 | magenta     | 223.8857 | 70.3826 | 0.963941 | 0.008175 | 3.984   |
| gnl UG Ssc#S19546082 | turquoise   | 650.6908 | 207.347 | 0.920493 | 0.026589 | 15.312  |
| gnl UG Ssc#S19546091 | magenta     | 289.2523 | 51.5657 | 0.896386 | 0.039409 | 22.016  |

|                      |               |          |         |          |          |         |
|----------------------|---------------|----------|---------|----------|----------|---------|
| gnl UG Ssc#S19546104 | black         | 867.2252 | 79.967  | 0.956156 | 0.010948 | 10.074  |
| gnl UG Ssc#S19546106 | red           | 402.9668 | 76.2983 | 0.917639 | 0.02802  | 45.622  |
| gnl UG Ssc#S19546114 | midnightblue  | 171.4873 | 37.9489 | 0.939502 | 0.0177   | 9.07    |
| gnl UG Ssc#S19546165 | turquoise     | 438.4343 | 105.74  | 0.718087 | 0.171882 | 5.06    |
| gnl UG Ssc#S19546218 | darkorange    | 47.18578 | 2.74966 | 0.464608 | 0.430474 | 13.322  |
| gnl UG Ssc#S19546257 | turquoise     | 655.2155 | 175.648 | 0.86772  | 0.056593 | 53.572  |
| gnl UG Ssc#S19546269 | salmon        | 207.4634 | 48.7666 | 0.981054 | 0.003122 | 8.82    |
| gnl UG Ssc#S19546291 | blue          | 851.0584 | 244.887 | 0.980131 | 0.003352 | 4.322   |
| gnl UG Ssc#S19546334 | blue          | 579.7303 | 121.689 | 0.824282 | 0.086053 | 10.036  |
| gnl UG Ssc#S19547691 | midnightblue  | 198.469  | 30.823  | 0.888145 | 0.044146 | 158.274 |
| gnl UG Ssc#S19547811 | black         | 948.7043 | 96.2737 | 0.992889 | 0.000719 | 9.656   |
| gnl UG Ssc#S19547860 | grey60        | 906.5755 | 62.2336 | 0.994818 | 0.000447 | 31.818  |
| gnl UG Ssc#S19547879 | black         | 906.0291 | 94.3581 | 0.988774 | 0.001425 | 2.944   |
| gnl UG Ssc#S19548031 | yellow        | 164.5691 | 49.9609 | 0.786772 | 0.11434  | 24.926  |
| gnl UG Ssc#S19548740 | greenyellow   | 149.9233 | 41.4243 | 0.928676 | 0.02262  | 61.484  |
| gnl UG Ssc#S19548981 | yellow        | 232.6932 | 74.7323 | 0.893479 | 0.04106  | 10.834  |
| gnl UG Ssc#S19549058 | paleturquoise | 169.6827 | 18.5718 | 0.948616 | 0.013874 | 24.338  |
| gnl UG Ssc#S19549165 | red           | 537.8796 | 105.493 | 0.989306 | 0.001325 | 16.796  |
| gnl UG Ssc#S19549174 | grey          | 247.9511 | 12.2371 | 0.98534  | 0.002126 | 8.574   |
| gnl UG Ssc#S19549267 | sienna3       | 960.1794 | 26.0823 | 0.999709 | 5.96E-06 | 9.342   |
| gnl UG Ssc#S19549653 | darkred       | 257.8744 | 19.198  | 0.796141 | 0.107049 | 26.688  |
| gnl UG Ssc#S19550340 | darkgreen     | 273.6065 | 34.3957 | 0.958463 | 0.010099 | 4.69    |
| gnl UG Ssc#S19550965 | yellow        | 310.3477 | 118.207 | 0.996378 | 0.000261 | 33.996  |
| gnl UG Ssc#S20938341 | sienna3       | 997.558  | 25.2344 | 0.993028 | 0.000698 | 10.914  |
| gnl UG Ssc#S20944779 | magenta       | 207.7938 | 64.1263 | 0.947032 | 0.014517 | 3.676   |
| gnl UG Ssc#S20945025 | red           | 573.4275 | 93.1993 | 0.962492 | 0.008671 | 69.23   |
| gnl UG Ssc#S20945368 | magenta       | 196.4009 | 60.1925 | 0.932334 | 0.020914 | 1.58    |
| gnl UG Ssc#S21107071 | violet        | 989.6679 | 72.0963 | 0.990648 | 0.001084 | 37.062  |
| gnl UG Ssc#S21107119 | blue          | 915.441  | 244.53  | 0.98208  | 0.002872 | 7.912   |
| gnl UG Ssc#S21550606 | white         | 210.0457 | 23.4179 | 0.936124 | 0.019193 | 1.87    |
| gnl UG Ssc#S21554547 | turquoise     | 871.1097 | 258.789 | 0.964261 | 0.008067 | 4.786   |
| gnl UG Ssc#S21558492 | lightgreen    | 308.0946 | 59.314  | 0.992625 | 0.000759 | 8.71    |
| gnl UG Ssc#S21575132 | white         | 931.4712 | 28.7854 | 0.779551 | 0.120056 | 4.052   |
| gnl UG Ssc#S21575274 | greenyellow   | 192.2271 | 54.9422 | 0.996212 | 0.00028  | 19.41   |
| gnl UG Ssc#S22271675 | brown         | 101.1839 | 33.8573 | 0.552338 | 0.334346 | 22.116  |
| gnl UG Ssc#S22272334 | purple        | 224.5463 | 19.7235 | -0.85961 | 0.061796 | 14.436  |
| gnl UG Ssc#S22272834 | yellow        | 286.6086 | 106.455 | 0.969552 | 0.006349 | 4       |
| gnl UG Ssc#S22273263 | brown         | 128.9006 | 45.0417 | 0.864867 | 0.058408 | 2.202   |
| gnl UG Ssc#S22273337 | turquoise     | 440.6442 | 141.717 | 0.764726 | 0.132051 | 2.758   |
| gnl UG Ssc#S22274193 | black         | 960.7358 | 98.581  | 0.997886 | 0.000117 | 9.566   |
| gnl UG Ssc#S22274398 | midnightblue  | 123.422  | 30.5543 | 0.886956 | 0.044844 | 16.348  |
| gnl UG Ssc#S22274609 | purple        | 206.6163 | 15.1936 | -0.82119 | 0.088292 | 5.422   |
| gnl UG Ssc#S22274737 | magenta       | 183.8336 | 55.7147 | 0.918072 | 0.027802 | 2.878   |
| gnl UG Ssc#S22275000 | red           | 395.8802 | 95.8181 | 0.967765 | 0.006914 | 28.666  |
| gnl UG Ssc#S22275082 | salmon        | 131.419  | 39.4938 | 0.927959 | 0.022959 | 10.846  |
| gnl UG Ssc#S22275237 | royalblue     | 288.7784 | 30.1709 | 0.959509 | 0.009721 | 5.836   |
| gnl UG Ssc#S22275831 | grey          | 121.7201 | 12.0788 | 0.193492 | 0.755184 | 2.36    |
| gnl UG Ssc#S22275888 | midnightblue  | 66.5293  | 3.63271 | -0.30408 | 0.618891 | 11.72   |

|                      |               |          |         |          |          |         |
|----------------------|---------------|----------|---------|----------|----------|---------|
| gnl UG Ssc#S22275958 | black         | 953.8163 | 98.5132 | 0.997979 | 0.000109 | 29.456  |
| gnl UG Ssc#S22276100 | darkturquoise | 199.1864 | 31.4881 | 0.968685 | 0.006621 | 1.628   |
| gnl UG Ssc#S22276642 | darkred       | 240.9949 | 17.55   | 0.77144  | 0.126577 | 1.79    |
| gnl UG Ssc#S22277516 | turquoise     | 307.246  | 102.507 | 0.658928 | 0.22648  | 43.496  |
| gnl UG Ssc#S22277550 | darkturquoise | 194.1711 | 35.1289 | 0.997656 | 0.000136 | 8.008   |
| gnl UG Ssc#S22278253 | salmon        | 181.5139 | 44.9867 | 0.961563 | 0.008994 | 24.462  |
| gnl UG Ssc#S22278643 | blue          | 940.8075 | 224.223 | 0.965484 | 0.007658 | 28.158  |
| gnl UG Ssc#S22279857 | pink          | 264.5653 | 75.5496 | 0.998359 | 7.98E-05 | 0.118   |
| gnl UG Ssc#S22279946 | paleturquoise | 163.9317 | 15.7231 | 0.907863 | 0.033105 | 11.39   |
| gnl UG Ssc#S22280355 | paleturquoise | 157.8937 | 17.3122 | 0.930052 | 0.021973 | 3.372   |
| gnl UG Ssc#S22281680 | green         | 175.0134 | 22.2124 | 0.338119 | 0.577843 | 15.124  |
| gnl UG Ssc#S22281703 | grey60        | 969.8012 | 60.2145 | 0.988084 | 0.001559 | 18.94   |
| gnl UG Ssc#S22282893 | black         | 978.7427 | 96.4135 | 0.992874 | 0.000721 | 26.404  |
| gnl UG Ssc#S22283333 | red           | 716.5362 | 83.6792 | 0.93745  | 0.018602 | 69.234  |
| gnl UG Ssc#S22284067 | red           | 423.3772 | 103.968 | 0.986109 | 0.001961 | 7.682   |
| gnl UG Ssc#S22284475 | black         | 961.8265 | 98.4879 | 0.998041 | 0.000104 | 16.12   |
| gnl UG Ssc#S22284677 | purple        | 214.8011 | 16.7712 | -0.79634 | 0.106895 | 4.298   |
| gnl UG Ssc#S22285435 | turquoise     | 204.2432 | 65.3157 | 0.590327 | 0.294654 | 2.088   |
| gnl UG Ssc#S22286222 | red           | 591.5798 | 108.179 | 0.994256 | 0.000522 | 12.628  |
| gnl UG Ssc#S22286260 | grey          | 153.1669 | 14.0412 | -0.8714  | 0.054279 | 58.916  |
| gnl UG Ssc#S22286650 | turquoise     | 358.0238 | 106.664 | 0.687196 | 0.199864 | 13.036  |
| gnl UG Ssc#S22287254 | green         | 96.79745 | 33.1652 | 0.793584 | 0.109024 | 31.188  |
| gnl UG Ssc#S22287363 | turquoise     | 898.7535 | 263.208 | 0.98604  | 0.001976 | 18.304  |
| gnl UG Ssc#S22304929 | turquoise     | 136.3614 | 44.3926 | 0.487819 | 0.404488 | 4.914   |
| gnl UG Ssc#S22312937 | lightyellow   | 965.1814 | 63.0342 | 0.998406 | 7.64E-05 | 9.104   |
| gnl UG Ssc#S22313154 | turquoise     | 873.5031 | 258.471 | 0.980621 | 0.003229 | 165.894 |
| gnl UG Ssc#S22313956 | white         | 185.4702 | 25.7445 | 0.888067 | 0.044192 | 6.708   |
| gnl UG Ssc#S22316206 | brown         | 70.9781  | 28.4077 | 0.531923 | 0.356188 | 25.136  |
| gnl UG Ssc#S23689583 | blue          | 682.1152 | 174.757 | 0.906644 | 0.033757 | 17.964  |
| gnl UG Ssc#S23689697 | tan           | 933.6324 | 68.6914 | 0.998057 | 0.000103 | 3.642   |
| gnl UG Ssc#S23689787 | blue          | 707.0078 | 156.443 | 0.88499  | 0.046004 | 10.332  |
| gnl UG Ssc#S23689840 | skyblue       | 193.6682 | 26.6485 | 0.952993 | 0.012148 | 37.052  |
| gnl UG Ssc#S23689938 | white         | 227.7394 | 22.5759 | 0.68016  | 0.206402 | 6.768   |
| gnl UG Ssc#S23690002 | green         | 153.3222 | 43.1909 | 0.90426  | 0.035046 | 36.126  |
| gnl UG Ssc#S23690384 | magenta       | 242.621  | 78.7745 | 0.990382 | 0.001131 | 5.924   |
| gnl UG Ssc#S23690475 | turquoise     | 737.4587 | 204.706 | 0.921194 | 0.026241 | 44.072  |
| gnl UG Ssc#S23690683 | lightyellow   | 987.0149 | 63.1196 | 0.998624 | 6.13E-05 | 36.352  |
| gnl UG Ssc#S23690802 | darkturquoise | 158.8701 | 22.9112 | 0.890017 | 0.043055 | 28.062  |
| gnl UG Ssc#S23690807 | yellow        | 261.9429 | 87.0877 | 0.928145 | 0.022871 | 20.098  |
| gnl UG Ssc#S23690967 | blue          | 548.5393 | 126.195 | 0.836911 | 0.077099 | 28.766  |
| gnl UG Ssc#S23691069 | red           | 604.0217 | 108.616 | 0.995202 | 0.000399 | 32.576  |
| gnl UG Ssc#S23691079 | turquoise     | 913.2674 | 259.89  | 0.974375 | 0.004905 | 43.142  |
| gnl UG Ssc#S23691136 | red           | 525.8688 | 84.9376 | 0.940583 | 0.01723  | 25.016  |
| gnl UG Ssc#S23691157 | salmon        | 295.0042 | 43.5574 | 0.949212 | 0.013634 | 11.9    |
| gnl UG Ssc#S23691372 | yellow        | 189.2282 | 65.0935 | 0.84797  | 0.069513 | 9.936   |
| gnl UG Ssc#S23691718 | green         | 139.5693 | 19.0843 | 0.073036 | 0.90709  | 59.164  |
| gnl UG Ssc#S23691805 | brown         | 144.5294 | 17.4198 | 0.5925   | 0.292423 | 13.458  |
| gnl UG Ssc#S23691900 | turquoise     | 947.4292 | 263.823 | 0.985138 | 0.00217  | 11.438  |

|                      |               |          |         |          |          |         |
|----------------------|---------------|----------|---------|----------|----------|---------|
| gnl UG Ssc#S23691927 | green         | 114.0344 | 18.2814 | 0.403652 | 0.500374 | 13.366  |
| gnl UG Ssc#S23692548 | salmon        | 136.2726 | 34.4176 | 0.891818 | 0.042013 | 9.048   |
| gnl UG Ssc#S23692872 | turquoise     | 843.4156 | 235.651 | 0.94544  | 0.015172 | 15.136  |
| gnl UG Ssc#S23692986 | black         | 621.6867 | 64.2012 | 0.911671 | 0.031092 | 3.822   |
| gnl UG Ssc#S23693254 | greenyellow   | 213.3963 | 47.452  | 0.959556 | 0.009704 | 21.43   |
| gnl UG Ssc#S23693266 | turquoise     | 235.6574 | 59.9209 | 0.594103 | 0.29078  | 16.376  |
| gnl UG Ssc#S23693320 | red           | 666.1172 | 97.5145 | 0.970798 | 0.005964 | 11.232  |
| gnl UG Ssc#S23693357 | red           | 433.0384 | 102.649 | 0.983362 | 0.00257  | 129.166 |
| gnl UG Ssc#S23693410 | royalblue     | 387.9215 | 32.5941 | 0.996028 | 0.0003   | 9.392   |
| gnl UG Ssc#S23693441 | darkgrey      | 178.5682 | 30.6687 | 0.966714 | 0.007254 | 13.424  |
| gnl UG Ssc#S23694531 | turquoise     | 295.461  | 65.5999 | 0.55984  | 0.326408 | 30.874  |
| gnl UG Ssc#S23694535 | blue          | 638.318  | 197.297 | 0.928118 | 0.022884 | 16.088  |
| gnl UG Ssc#S23694970 | yellow        | 208.8703 | 69.0823 | 0.862958 | 0.059632 | 25.742  |
| gnl UG Ssc#S23695084 | white         | 185.573  | 19.6073 | 0.639504 | 0.24529  | 22.286  |
| gnl UG Ssc#S23695102 | lightcyan     | 156.4116 | 10.9539 | 0.443009 | 0.454979 | 38.56   |
| gnl UG Ssc#S23695121 | turquoise     | 488.0582 | 117.805 | 0.772485 | 0.125731 | 4.628   |
| gnl UG Ssc#S23695134 | yellow        | 306.1996 | 118.789 | 0.997849 | 0.00012  | 3.742   |
| gnl UG Ssc#S23695164 | white         | 963.91   | 26.7195 | 0.772496 | 0.125722 | 5.272   |
| gnl UG Ssc#S23695204 | black         | 802.8999 | 78.0845 | 0.951186 | 0.012851 | 36.876  |
| gnl UG Ssc#S23695295 | grey          | 220.8452 | 11.4641 | 0.520916 | 0.368102 | 22.186  |
| gnl UG Ssc#S23695328 | turquoise     | 880.9723 | 249.652 | 0.961509 | 0.009013 | 13.812  |
| gnl UG Ssc#S23695397 | salmon        | 140.5725 | 38.3319 | 0.920082 | 0.026793 | 10.456  |
| gnl UG Ssc#S23695759 | green         | 70.45445 | 27.5925 | 0.731222 | 0.160358 | 25.906  |
| gnl UG Ssc#S23695896 | darkgreen     | 247.0396 | 36.9495 | 0.975798 | 0.004503 | 54.418  |
| gnl UG Ssc#S23696553 | blue          | 877.775  | 230.024 | 0.965796 | 0.007555 | 18.938  |
| gnl UG Ssc#S23696616 | yellow        | 291.0455 | 111.122 | 0.981413 | 0.003034 | 110.464 |
| gnl UG Ssc#S23696619 | turquoise     | 601.8067 | 167.959 | 0.84789  | 0.069567 | 15.508  |
| gnl UG Ssc#S23696689 | lightgreen    | 291.7922 | 59.0754 | 0.991761 | 0.000897 | 11.84   |
| gnl UG Ssc#S23696700 | darkorange    | 203.2458 | 19.9064 | 0.986737 | 0.00183  | 5.438   |
| gnl UG Ssc#S23696826 | purple        | 87.95389 | 18.2424 | 0.767498 | 0.129783 | 12.694  |
| gnl UG Ssc#S23697216 | turquoise     | 883.939  | 267.546 | 0.974014 | 0.005009 | 63.084  |
| gnl UG Ssc#S23697230 | magenta       | 238.5053 | 56.7764 | 0.921884 | 0.0259   | 26.986  |
| gnl UG Ssc#S23697813 | yellow        | 242.4116 | 82.4666 | 0.910001 | 0.03197  | 3.018   |
| gnl UG Ssc#S23697932 | pink          | 203.5017 | 39.0394 | 0.852135 | 0.06672  | 32.684  |
| gnl UG Ssc#S23698058 | blue          | 758.755  | 217.852 | 0.958177 | 0.010203 | 12.52   |
| gnl UG Ssc#S23698110 | paleturquoise | 139.9493 | 12.149  | 0.824102 | 0.086183 | 19.898  |
| gnl UG Ssc#S23698716 | midnightblue  | 178.8196 | 40.7293 | 0.967586 | 0.006971 | 123.776 |
| gnl UG Ssc#S23698735 | sienna3       | 903.7303 | 25.1741 | 0.992671 | 0.000752 | 5.576   |
| gnl UG Ssc#S23698752 | darkgreen     | 257.3968 | 35.578  | 0.968509 | 0.006677 | 28.084  |
| gnl UG Ssc#S23698821 | lightcyan     | 248.7126 | 38.9036 | 0.965659 | 0.0076   | 10.344  |
| gnl UG Ssc#S23699498 | yellow        | 209.0617 | 73.3576 | 0.880739 | 0.048546 | 0.566   |
| gnl UG Ssc#S23699782 | navy          | 129.5499 | 40.8531 | 0.928742 | 0.022588 | 1.772   |
| gnl UG Ssc#S23699859 | darkturquoise | 205.8758 | 30.7823 | 0.964496 | 0.007988 | 7.482   |
| gnl UG Ssc#S23699941 | navy          | 134.9967 | 3.33088 | -0.66633 | 0.219424 | 2.348   |
| gnl UG Ssc#S23700002 | turquoise     | 515.6845 | 167.272 | 0.834617 | 0.078703 | 92.826  |
| gnl UG Ssc#S23700016 | yellowgreen   | 162.7663 | 16.576  | 0.966404 | 0.007355 | 11.53   |
| gnl UG Ssc#S23700159 | purple        | 54.36891 | 13.8586 | 0.819631 | 0.089426 | 67.062  |
| gnl UG Ssc#S23700422 | red           | 421.4231 | 103.336 | 0.984821 | 0.00224  | 118.48  |

|                      |               |          |         |          |          |         |
|----------------------|---------------|----------|---------|----------|----------|---------|
| gnl UG Ssc#S23701109 | blue          | 563.5358 | 173.685 | 0.901978 | 0.036293 | 32.268  |
| gnl UG Ssc#S23701196 | greenyellow   | 48.8584  | 2.21865 | 0.279553 | 0.648754 | 18.47   |
| gnl UG Ssc#S23701257 | blue          | 862.4637 | 243.238 | 0.979516 | 0.003508 | 17.546  |
| gnl UG Ssc#S23701295 | blue          | 680.4684 | 190.699 | 0.923214 | 0.025246 | 8.122   |
| gnl UG Ssc#S23701516 | sienna3       | 948.9557 | 25.7602 | 0.997291 | 0.000169 | 13.826  |
| gnl UG Ssc#S23755332 | darkred       | 251.8575 | 40.8116 | 0.971386 | 0.005785 | 2.95    |
| gnl UG Ssc#S23755373 | brown         | 208.7836 | 61.67   | 0.957719 | 0.01037  | 27.07   |
| gnl UG Ssc#S23755435 | blue          | 831.7251 | 181.731 | 0.91624  | 0.028731 | 181.21  |
| gnl UG Ssc#S23755492 | violet        | 929.4696 | 74.6499 | 0.997668 | 0.000135 | 1.63    |
| gnl UG Ssc#S23755550 | green         | 157.0934 | 22.5296 | 0.297578 | 0.626781 | 23.54   |
| gnl UG Ssc#S23755551 | green         | 109.6375 | 31.4748 | 0.759949 | 0.135987 | 56.424  |
| gnl UG Ssc#S23755976 | darkorange    | 112.8165 | 17.3679 | 0.89747  | 0.038799 | 21.696  |
| gnl UG Ssc#S23756098 | purple        | 82.41435 | 16.9778 | 0.742178 | 0.150925 | 225.908 |
| gnl UG Ssc#S23756321 | black         | 945.7746 | 97.3701 | 0.995201 | 0.000399 | 8.934   |
| gnl UG Ssc#S23756324 | green         | 95.39442 | 40.9483 | 0.837006 | 0.077033 | 9.204   |
| gnl UG Ssc#S23756535 | darkturquoise | 135.0747 | 6.88341 | 0.621767 | 0.262816 | 2.232   |
| gnl UG Ssc#S23756582 | pink          | 264.5653 | 75.5496 | 0.998359 | 7.98E-05 | 0.078   |
| gnl UG Ssc#S23756822 | white         | 814.0091 | 26.7511 | 0.809222 | 0.097116 | 7.792   |
| gnl UG Ssc#S23756850 | salmon        | 168.7954 | 38.5226 | 0.919425 | 0.027122 | 124.658 |
| gnl UG Ssc#S23756909 | turquoise     | 877.6614 | 245.434 | 0.958243 | 0.010179 | 29.996  |
| gnl UG Ssc#S23757077 | navy          | 129.5499 | 40.8531 | 0.928742 | 0.022588 | 0.272   |
| gnl UG Ssc#S23757521 | pink          | 277.9503 | 71.544  | 0.970311 | 0.006114 | 17.286  |
| gnl UG Ssc#S23757556 | navy          | 106.5974 | 25.2758 | 0.791274 | 0.110818 | 10.786  |
| gnl UG Ssc#S23757653 | pink          | 273.644  | 69.3339 | 0.969657 | 0.006316 | 12.716  |
| gnl UG Ssc#S23757695 | lightyellow   | 903.8376 | 61.2376 | 0.99262  | 0.00076  | 31.58   |
| gnl UG Ssc#S23757705 | blue          | 515.0101 | 133.552 | 0.841167 | 0.074151 | 11.538  |
| gnl UG Ssc#S23757763 | green         | 93.25576 | 35.2818 | 0.814554 | 0.093152 | 41.782  |
| gnl UG Ssc#S23758125 | royalblue     | 265.6713 | 13.3476 | 0.715456 | 0.174218 | 14.958  |
| gnl UG Ssc#S23758297 | orange        | 453.6493 | 32.8967 | 0.980664 | 0.003218 | 20.672  |
| gnl UG Ssc#S23758340 | magenta       | 273.7198 | 75.8915 | 0.982327 | 0.002813 | 3.594   |
| gnl UG Ssc#S23758422 | blue          | 817.3722 | 231.712 | 0.96563  | 0.007609 | 28.2    |
| gnl UG Ssc#S23758705 | greenyellow   | 122.3417 | 10.8903 | 0.659809 | 0.225636 | 143.996 |
| gnl UG Ssc#S23758881 | salmon        | 198.8034 | 50.2704 | 0.989658 | 0.001261 | 41.24   |
| gnl UG Ssc#S23758884 | red           | 447.4113 | 103.547 | 0.985149 | 0.002168 | 27.022  |
| gnl UG Ssc#S23758955 | turquoise     | 811.6879 | 254.492 | 0.950359 | 0.013178 | 100.722 |
| gnl UG Ssc#S23759010 | lightyellow   | 1001.445 | 60.0877 | 0.988602 | 0.001458 | 21.05   |
| gnl UG Ssc#S23759049 | darkmagenta   | 914.9029 | 26.558  | 0.990838 | 0.001051 | 6.57    |
| gnl UG Ssc#S23759123 | yellow        | 285.929  | 104.618 | 0.965604 | 0.007618 | 3.644   |
| gnl UG Ssc#S23759125 | royalblue     | 268.4968 | 25.4713 | 0.904126 | 0.035119 | 12.004  |
| gnl UG Ssc#S23759297 | midnightblue  | 115.1485 | 34.1572 | 0.937553 | 0.018556 | 0.608   |
| gnl UG Ssc#S23759508 | navy          | 206.7399 | 10.4098 | -0.51997 | 0.369136 | 85.928  |
| gnl UG Ssc#S23759619 | green         | 73.10773 | 29.9809 | 0.744946 | 0.148568 | 45.99   |
| gnl UG Ssc#S23759640 | turquoise     | 778.158  | 247.182 | 0.93498  | 0.019707 | 40.926  |
| gnl UG Ssc#S23759681 | green         | 86.97867 | 47.7167 | 0.911504 | 0.03118  | 19.008  |
| gnl UG Ssc#S23759759 | blue          | 945.3182 | 210.653 | 0.9506   | 0.013082 | 33.95   |
| gnl UG Ssc#S23760025 | purple        | 149.4636 | 12.0264 | -0.92129 | 0.026191 | 22.812  |
| gnl UG Ssc#S23760280 | blue          | 830.1191 | 211.837 | 0.947184 | 0.014455 | 17.908  |
| gnl UG Ssc#S23760498 | blue          | 897.0628 | 197.909 | 0.935535 | 0.019457 | 20.722  |

|                      |               |          |         |          |          |         |
|----------------------|---------------|----------|---------|----------|----------|---------|
| gnl UG Ssc#S23760821 | green         | 99.89155 | 51.4852 | 0.920832 | 0.02642  | 10.72   |
| gnl UG Ssc#S23761044 | grey60        | 940.06   | 61.946  | 0.993775 | 0.000589 | 9.85    |
| gnl UG Ssc#S23761475 | yellow        | 308.9719 | 117.685 | 0.994582 | 0.000478 | 1.242   |
| gnl UG Ssc#S23761814 | purple        | 120.0137 | 13.1742 | -0.60868 | 0.275949 | 22.336  |
| gnl UG Ssc#S23761942 | green         | 103.2762 | 27.9556 | 0.743212 | 0.150043 | 2.94    |
| gnl UG Ssc#S23762132 | yellow        | 275.7757 | 103.972 | 0.964382 | 0.008026 | 11.352  |
| gnl UG Ssc#S23762352 | blue          | 783.5289 | 196.5   | 0.928867 | 0.02253  | 5.446   |
| gnl UG Ssc#S23762453 | blue          | 857.2214 | 234.038 | 0.970188 | 0.006151 | 36.894  |
| gnl UG Ssc#S23762471 | brown         | 156.613  | 40.7668 | 0.805547 | 0.099877 | 19.502  |
| gnl UG Ssc#S23762560 | grey          | 142.6195 | 7.4064  | 0.887207 | 0.044696 | 13.776  |
| gnl UG Ssc#S23762736 | royalblue     | 314.8344 | 31.3159 | 0.975926 | 0.004468 | 70.506  |
| gnl UG Ssc#S23763543 | yellow        | 299.1772 | 107.427 | 0.972729 | 0.005384 | 13.16   |
| gnl UG Ssc#S23763873 | violet        | 951.9937 | 75.104  | 0.998919 | 4.26E-05 | 29.434  |
| gnl UG Ssc#S23764274 | magenta       | 273.2259 | 78.0096 | 0.987496 | 0.001675 | 6.886   |
| gnl UG Ssc#S23764286 | turquoise     | 392.8947 | 110.787 | 0.71136  | 0.177873 | 5.198   |
| gnl UG Ssc#S23764351 | red           | 725.4388 | 90.8548 | 0.955142 | 0.011328 | 16.234  |
| gnl UG Ssc#S23764699 | salmon        | 314.1365 | 42.7411 | 0.943124 | 0.016143 | 31.35   |
| gnl UG Ssc#S23765090 | turquoise     | 939.3573 | 269.828 | 0.989697 | 0.001254 | 18.54   |
| gnl UG Ssc#S23765150 | yellow        | 288.8633 | 101.388 | 0.957977 | 0.010276 | 11.228  |
| gnl UG Ssc#S23765416 | yellow        | 235.3629 | 75.7101 | 0.897856 | 0.038582 | 6.892   |
| gnl UG Ssc#S23765932 | navy          | 197.2487 | 10.8531 | -0.60065 | 0.28409  | 184.246 |
| gnl UG Ssc#S23765987 | blue          | 884.0043 | 250.793 | 0.988151 | 0.001546 | 84.06   |
| gnl UG Ssc#S23766507 | magenta       | 203.2979 | 59.8779 | 0.934206 | 0.020058 | 9.714   |
| gnl UG Ssc#S23766613 | turquoise     | 560.3924 | 140.494 | 0.789147 | 0.112478 | 5.036   |
| gnl UG Ssc#S23766626 | lightgreen    | 301.1065 | 57.9469 | 0.98786  | 0.001603 | 2.36    |
| gnl UG Ssc#S23766637 | turquoise     | 837.6027 | 262.692 | 0.963284 | 0.008399 | 90.88   |
| gnl UG Ssc#S23766713 | turquoise     | 242.9831 | 63.3463 | 0.534881 | 0.353002 | 6.516   |
| gnl UG Ssc#S23766741 | lightgreen    | 301.1398 | 60.8023 | 0.997691 | 0.000133 | 3.062   |
| gnl UG Ssc#S23767099 | lightyellow   | 893.4107 | 61.425  | 0.993177 | 0.000676 | 7.096   |
| gnl UG Ssc#S23767247 | red           | 666.0672 | 101.38  | 0.980003 | 0.003384 | 11.522  |
| gnl UG Ssc#S23768000 | turquoise     | 904.6096 | 257.484 | 0.970805 | 0.005962 | 22.322  |
| gnl UG Ssc#S23768055 | turquoise     | 700.5173 | 221.819 | 0.900511 | 0.037103 | 20.562  |
| gnl UG Ssc#S23768102 | magenta       | 269.6816 | 80.4722 | 0.995085 | 0.000413 | 4.248   |
| gnl UG Ssc#S23768212 | lightgreen    | 280.9114 | 56.3541 | 0.982125 | 0.002861 | 13.56   |
| gnl UG Ssc#S23768320 | red           | 420.5364 | 92.8566 | 0.961251 | 0.009103 | 22.928  |
| gnl UG Ssc#S23769437 | green         | 102.5011 | 59.1967 | 0.971119 | 0.005866 | 27.726  |
| gnl UG Ssc#S23769966 | midnightblue  | 92.92207 | 36.0669 | 0.945037 | 0.01534  | 11.712  |
| gnl UG Ssc#S23770591 | turquoise     | 293.1723 | 84.0732 | 0.627441 | 0.257174 | 6.694   |
| gnl UG Ssc#S23770850 | pink          | 124.2573 | 8.72084 | -0.19233 | 0.756639 | 70.526  |
| gnl UG Ssc#S23770912 | yellow        | 211.822  | 67.6496 | 0.860104 | 0.061477 | 1.788   |
| gnl UG Ssc#S23770961 | magenta       | 261.7777 | 75.4171 | 0.980834 | 0.003176 | 60.152  |
| gnl UG Ssc#S23771584 | yellow        | 200.5021 | 70.0749 | 0.865289 | 0.058138 | 2.674   |
| gnl UG Ssc#S23772152 | yellow        | 308.5696 | 118.297 | 0.99659  | 0.000239 | 42.976  |
| gnl UG Ssc#S23772162 | darkorange    | 97.76632 | 12.2524 | 0.817315 | 0.09112  | 4.652   |
| gnl UG Ssc#S23772243 | turquoise     | 330.8263 | 75.2862 | 0.60508  | 0.279595 | 25.456  |
| gnl UG Ssc#S23772402 | tan           | 965.6926 | 59.4407 | 0.965927 | 0.007511 | 26.584  |
| gnl UG Ssc#S23773089 | paleturquoise | 190.7037 | 19.9301 | 0.955801 | 0.01108  | 1.124   |
| gnl UG Ssc#S23775145 | blue          | 742.6613 | 212.707 | 0.945003 | 0.015354 | 99.22   |

|                      |             |          |         |          |          |         |
|----------------------|-------------|----------|---------|----------|----------|---------|
| gnl UG Ssc#S23775247 | royalblue   | 369.0636 | 32.9774 | 0.997605 | 0.000141 | 3917.98 |
| gnl UG Ssc#S23775283 | blue        | 690.7921 | 199.781 | 0.938321 | 0.018217 | 13.374  |
| gnl UG Ssc#S23775351 | magenta     | 265.4117 | 79.4882 | 0.992759 | 0.000739 | 9.304   |
| gnl UG Ssc#S23775735 | pink        | 219.3998 | 63.8867 | 0.961593 | 0.008983 | 45.668  |
| gnl UG Ssc#S23775891 | greenyellow | 205.9696 | 44.6359 | 0.945137 | 0.015299 | 106.154 |
| gnl UG Ssc#S23776629 | green       | 93.64861 | 46.0764 | 0.890647 | 0.04269  | 31.7    |
| gnl UG Ssc#S23776821 | darkred     | 189.3895 | 33.614  | 0.928859 | 0.022533 | 14.766  |
| gnl UG Ssc#S23776939 | lightcyan   | 296.1664 | 43.7365 | 0.98603  | 0.001978 | 18.66   |
| gnl UG Ssc#S24609641 | blue        | 729.2138 | 209.525 | 0.946037 | 0.014926 | 28.49   |
| gnl UG Ssc#S24610253 | purple      | 105.6753 | 22.5078 | 0.926065 | 0.023863 | 3.144   |
| gnl UG Ssc#S25134978 | green       | 102.0927 | 42.2246 | 0.881187 | 0.048276 | 17.968  |
| gnl UG Ssc#S25135543 | lightcyan   | 95.01709 | 8.18056 | 0.633467 | 0.251219 | 28.362  |
| gnl UG Ssc#S25135588 | brown       | 85.30389 | 24.8782 | 0.437838 | 0.46089  | 15.264  |
| gnl UG Ssc#S25135664 | green       | 86.13036 | 49.7216 | 0.904929 | 0.034683 | 510.858 |
| gnl UG Ssc#S25135824 | green       | 106.0996 | 41.7424 | 0.867861 | 0.056504 | 33.136  |
| gnl UG Ssc#S26390532 | black       | 805.3261 | 77.3823 | 0.949556 | 0.013497 | 2.598   |
| gnl UG Ssc#S26391783 | darkgreen   | 215.7482 | 32.5666 | 0.930673 | 0.021683 | 10.132  |
| gnl UG Ssc#S26394010 | orange      | 599.7007 | 26.6614 | 0.934699 | 0.019834 | 5.88    |
| gnl UG Ssc#S26395675 | purple      | 169.7972 | 17.0619 | -0.91197 | 0.030934 | 34.168  |
| gnl UG Ssc#S26396713 | blue        | 691.8858 | 170.638 | 0.89884  | 0.038032 | 18.342  |
| gnl UG Ssc#S26399811 | turquoise   | 194.7279 | 59.7136 | 0.532582 | 0.355477 | 63.96   |
| gnl UG Ssc#S26400438 | orange      | 391.0408 | 17.1944 | 0.839191 | 0.075515 | 34.6    |
| gnl UG Ssc#S26400566 | darkred     | 248.7499 | 45.3205 | 0.995562 | 0.000355 | 3.63    |
| gnl UG Ssc#S26434913 | turquoise   | 329.9492 | 71.0083 | 0.608683 | 0.275949 | 3.488   |
| gnl UG Ssc#S26644701 | yellowgreen | 167.7709 | 17.747  | 0.987468 | 0.001681 | 53.628  |
| gnl UG Ssc#S26645511 | turquoise   | 350.3859 | 85.0139 | 0.604434 | 0.28025  | 23.892  |
| gnl UG Ssc#S26646704 | green       | 83.95104 | 38.1432 | 0.832059 | 0.080504 | 12.888  |
| gnl UG Ssc#S26647295 | turquoise   | 764.1955 | 246.665 | 0.933736 | 0.020272 | 44.842  |
| gnl UG Ssc#S26648149 | darkorange  | 147.5216 | 7.90431 | 0.334281 | 0.582446 | 14.82   |
| gnl UG Ssc#S26648312 | grey60      | 925.254  | 62.8138 | 0.99669  | 0.000228 | 4.464   |
| gnl UG Ssc#S26648808 | green       | 168.6164 | 20.9547 | 0.405196 | 0.498576 | 13.214  |
| gnl UG Ssc#S26648854 | grey60      | 988.9315 | 58.4059 | 0.981693 | 0.002965 | 12.09   |
| gnl UG Ssc#S26649927 | black       | 963.831  | 98.3017 | 0.99722  | 0.000176 | 11.126  |
| gnl UG Ssc#S26650236 | magenta     | 242.1394 | 77.9548 | 0.9871   | 0.001755 | 4.032   |
| gnl UG Ssc#S26650700 | violet      | 966.901  | 74.89   | 0.998342 | 8.10E-05 | 23.918  |
| gnl UG Ssc#S26651783 | magenta     | 259.6159 | 82.211  | 0.999655 | 7.69E-06 | 3.018   |
| gnl UG Ssc#S26652589 | greenyellow | 218.9162 | 47.912  | 0.963952 | 0.008171 | 5.608   |
| gnl UG Ssc#S26710643 | lightgreen  | 300.0455 | 60.5339 | 0.996809 | 0.000216 | 4.538   |
| gnl UG Ssc#S26710759 | orange      | 640.4396 | 31.4317 | 0.97064  | 0.006012 | 89.226  |
| gnl UG Ssc#S26710977 | lightgreen  | 291.422  | 58.0067 | 0.988119 | 0.001552 | 2.204   |
| gnl UG Ssc#S26711201 | yellow      | 284.2709 | 106.321 | 0.97004  | 0.006197 | 6.666   |
| gnl UG Ssc#S26711451 | yellow      | 307.4795 | 114.263 | 0.987106 | 0.001754 | 8.266   |
| gnl UG Ssc#S26711473 | navy        | 147.3344 | 39.063  | 0.948802 | 0.013799 | 7.92    |
| gnl UG Ssc#S26711650 | turquoise   | 651.9807 | 189.497 | 0.889778 | 0.043194 | 80.92   |
| gnl UG Ssc#S26712602 | lightgreen  | 290.7708 | 57.8979 | 0.987729 | 0.001629 | 4.344   |
| gnl UG Ssc#S26712901 | yellow      | 308.9719 | 117.685 | 0.994582 | 0.000478 | 1.242   |
| gnl UG Ssc#S26713258 | darkgreen   | 252.4639 | 32.4556 | 0.937079 | 0.018767 | 5.08    |
| gnl UG Ssc#S26713408 | green       | 180.6036 | 17.3946 | 0.140431 | 0.821787 | 3.264   |

|                      |               |          |         |          |          |         |
|----------------------|---------------|----------|---------|----------|----------|---------|
| gnl UG Ssc#S26713534 | lightgreen    | 257.2769 | 54.7886 | 0.976633 | 0.004273 | 3.408   |
| gnl UG Ssc#S26713597 | yellow        | 305.8833 | 113.351 | 0.984426 | 0.002328 | 7.586   |
| gnl UG Ssc#S26713657 | turquoise     | 777.777  | 250.276 | 0.950562 | 0.013097 | 26.824  |
| gnl UG Ssc#S26713880 | lightgreen    | 287.2031 | 60.2361 | 0.995809 | 0.000326 | 13.064  |
| gnl UG Ssc#S26714423 | red           | 386.6673 | 94.6126 | 0.965803 | 0.007552 | 30.218  |
| gnl UG Ssc#S26714441 | turquoise     | 523.1362 | 146.459 | 0.809172 | 0.097154 | 126.554 |
| gnl UG Ssc#S26714520 | navy          | 111.8184 | 36.9372 | 0.886905 | 0.044874 | 13.19   |
| gnl UG Ssc#S26714587 | green         | 175.5179 | 19.8366 | 0.139899 | 0.822458 | 1.77    |
| gnl UG Ssc#S26714690 | yellow        | 304.3285 | 112.935 | 0.984179 | 0.002383 | 4.192   |
| gnl UG Ssc#S26714922 | salmon        | 124.2756 | 30.3797 | 0.862081 | 0.060197 | 54.25   |
| gnl UG Ssc#S26715431 | darkred       | 241.6351 | 41.3051 | 0.97444  | 0.004887 | 3.084   |
| gnl UG Ssc#S26715859 | darkturquoise | 210.467  | 32.9929 | 0.982265 | 0.002828 | 1.538   |
| gnl UG Ssc#S26715866 | yellow        | 287.75   | 101.342 | 0.955944 | 0.011027 | 9.566   |
| gnl UG Ssc#S26716026 | navy          | 80.57986 | 6.42668 | -0.00489 | 0.99377  | 89.132  |
| gnl UG Ssc#S26716062 | darkred       | 276.2128 | 44.9182 | 0.997185 | 0.000179 | 3.514   |
| gnl UG Ssc#S26716533 | greenyellow   | 175.1041 | 50.8868 | 0.97799  | 0.003907 | 0.36    |
| gnl UG Ssc#S26716874 | yellow        | 309.3335 | 118.716 | 0.997255 | 0.000173 | 10.708  |
| gnl UG Ssc#S26717032 | yellow        | 300.7349 | 109.933 | 0.976418 | 0.004332 | 68.936  |
| gnl UG Ssc#S26717661 | blue          | 725.2208 | 184.463 | 0.920223 | 0.026723 | 5.046   |
| gnl UG Ssc#S26717691 | royalblue     | 320.0081 | 16.2178 | 0.797193 | 0.106239 | 8.072   |
| gnl UG Ssc#S26718069 | orange        | 279.6646 | 29.5618 | 0.955675 | 0.011128 | 34.946  |
| gnl UG Ssc#S26718537 | turquoise     | 384.5081 | 102.278 | 0.696716 | 0.191113 | 2.98    |
| gnl UG Ssc#S26718597 | tan           | 823.4019 | 63.7095 | 0.982725 | 0.002719 | 42.958  |
| gnl UG Ssc#S26718943 | midnightblue  | 163.1163 | 40.1971 | 0.969051 | 0.006506 | 11.49   |
| gnl UG Ssc#S26718955 | brown         | 93.3696  | 32.4135 | 0.796562 | 0.106724 | 2.844   |
| gnl UG Ssc#S26719135 | yellow        | 277.2389 | 96.4176 | 0.94596  | 0.014958 | 9.854   |
| gnl UG Ssc#S26719371 | pink          | 240.9872 | 72.1035 | 0.995064 | 0.000416 | 413.882 |
| gnl UG Ssc#S26719435 | darkred       | 223.6073 | 35.4726 | 0.94306  | 0.01617  | 259.056 |
| gnl UG Ssc#S26719749 | yellow        | 177.1865 | 45.8878 | 0.78309  | 0.117245 | 1.52    |
| gnl UG Ssc#S26719780 | lightgreen    | 278.9062 | 56.7056 | 0.98339  | 0.002563 | 6.338   |
| gnl UG Ssc#S26719881 | white         | 192.5646 | 20.8634 | 0.768717 | 0.128789 | 4.392   |
| gnl UG Ssc#S26719960 | lightgreen    | 273.1209 | 55.5241 | 0.979298 | 0.003565 | 2.382   |
| gnl UG Ssc#S26720075 | grey          | 143.0791 | 11.6687 | 0.397302 | 0.507782 | 0.382   |
| gnl UG Ssc#S26720413 | green         | 42.01771 | 12.7326 | 0.48531  | 0.407279 | 5.568   |
| gnl UG Ssc#S26720420 | turquoise     | 890.4278 | 251.973 | 0.965323 | 0.007711 | 34.194  |
| gnl UG Ssc#S26720426 | darkorange    | 216.1817 | 18.8879 | 0.980554 | 0.003246 | 9.136   |
| gnl UG Ssc#S26720529 | navy          | 94.84829 | 29.8311 | 0.811803 | 0.095191 | 4.3     |
| gnl UG Ssc#S26720534 | blue          | 889.7263 | 249.532 | 0.987983 | 0.001578 | 10.644  |
| gnl UG Ssc#S26720630 | blue          | 812.1503 | 167.248 | 0.900072 | 0.037346 | 6.778   |
| gnl UG Ssc#S26720820 | yellow        | 302.4393 | 115.801 | 0.990069 | 0.001186 | 3.518   |
| gnl UG Ssc#S26721025 | yellow        | 308.2459 | 116.985 | 0.992725 | 0.000744 | 61.448  |
| gnl UG Ssc#S26721043 | darkgreen     | 216.9529 | 15.8301 | 0.720006 | 0.170184 | 0.94    |
| gnl UG Ssc#S26721109 | darkturquoise | 205.116  | 35.025  | 0.99736  | 0.000163 | 7.404   |
| gnl UG Ssc#S26721489 | lightyellow   | 959.812  | 62.653  | 0.997211 | 0.000177 | 16.868  |
| gnl UG Ssc#S26721530 | brown         | 66.69505 | 17.171  | 0.476324 | 0.417311 | 11.456  |
| gnl UG Ssc#S26721534 | yellow        | 309.2016 | 118.918 | 0.998134 | 9.67E-05 | 99.322  |
| gnl UG Ssc#S26721589 | lightgreen    | 304.4755 | 59.2048 | 0.992242 | 0.000819 | 1.688   |
| gnl UG Ssc#S26721666 | yellow        | 302.3932 | 116.021 | 0.990798 | 0.001058 | 4.402   |



|                      |               |          |         |          |          |         |
|----------------------|---------------|----------|---------|----------|----------|---------|
| gnl UG Ssc#S26721918 | blue          | 932.0325 | 226.123 | 0.964733 | 0.007908 | 14.24   |
| gnl UG Ssc#S26722141 | paleturquoise | 185.4271 | 19.8771 | 0.958074 | 0.01024  | 2.506   |
| gnl UG Ssc#S26722216 | purple        | 134.5153 | 20.9029 | 0.891165 | 0.04239  | 37.896  |
| gnl UG Ssc#S26722459 | purple        | 256.0804 | 7.94638 | 0.491912 | 0.399945 | 9.386   |
| gnl UG Ssc#S26722558 | brown         | 214.2581 | 50.2933 | 0.777458 | 0.121729 | 10.466  |
| gnl UG Ssc#S26723217 | turquoise     | 906.0338 | 259.388 | 0.977973 | 0.003911 | 5.416   |
| gnl UG Ssc#S26723327 | green         | 90.32893 | 51.4868 | 0.922477 | 0.025607 | 38.488  |
| gnl UG Ssc#S26723508 | violet        | 929.4696 | 74.6499 | 0.997668 | 0.000135 | 0.318   |
| gnl UG Ssc#S26723801 | white         | 213.7105 | 23.3128 | 0.749021 | 0.145119 | 2.774   |
| gnl UG Ssc#S26724122 | lightgreen    | 295.9503 | 58.8905 | 0.991177 | 0.000993 | 2.874   |
| gnl UG Ssc#S26724291 | lightgreen    | 294.7712 | 61.2079 | 0.999103 | 3.22E-05 | 10.732  |
| gnl UG Ssc#S26724425 | lightgreen    | 274.7209 | 58.4935 | 0.989864 | 0.001223 | 1.8     |
| gnl UG Ssc#S26724464 | yellow        | 275.4974 | 93.0095 | 0.940282 | 0.017361 | 9.196   |
| gnl UG Ssc#S26724489 | blue          | 871.0065 | 206.515 | 0.942385 | 0.016457 | 15.504  |
| gnl UG Ssc#S26724539 | midnightblue  | 198.9259 | 40.2274 | 0.961864 | 0.008889 | 16.048  |
| gnl UG Ssc#S26724832 | black         | 960.3862 | 96.6752 | 0.993487 | 0.00063  | 13.646  |
| gnl UG Ssc#S26725357 | darkgreen     | 283.4798 | 29.8681 | 0.942136 | 0.016563 | 2.582   |
| gnl UG Ssc#S26725439 | yellow        | 306.5128 | 115.809 | 0.991155 | 0.000997 | 9.444   |
| gnl UG Ssc#S26725722 | brown         | 172.0088 | 37.1157 | 0.745391 | 0.14819  | 57.49   |
| gnl UG Ssc#S26725970 | red           | 383.5987 | 96.044  | 0.968726 | 0.006608 | 0.208   |
| gnl UG Ssc#S26726120 | brown         | 180.3678 | 57.2973 | 0.859436 | 0.061911 | 24.19   |
| gnl UG Ssc#S26726211 | darkred       | 258.5628 | 41.8433 | 0.982179 | 0.002848 | 7.868   |
| gnl UG Ssc#S26726238 | darkred       | 224.5731 | 31.6032 | 0.917649 | 0.028016 | 5.724   |
| gnl UG Ssc#S26726300 | darkturquoise | 213.647  | 32.1157 | 0.974286 | 0.004931 | 1.278   |
| gnl UG Ssc#S26726336 | red           | 405.4812 | 97.955  | 0.973189 | 0.005249 | 1.802   |
| gnl UG Ssc#S26726474 | red           | 596.4439 | 84.2782 | 0.940463 | 0.017282 | 13.32   |
| gnl UG Ssc#S26726517 | grey60        | 906.7858 | 62.0335 | 0.994126 | 0.00054  | 2.552   |
| gnl UG Ssc#S26726607 | midnightblue  | 129.8146 | 27.3378 | 0.852795 | 0.066281 | 3.962   |
| gnl UG Ssc#S26726690 | turquoise     | 511.5338 | 134.173 | 0.788763 | 0.112778 | 2.632   |
| gnl UG Ssc#S26726753 | yellow        | 303.1722 | 116.88  | 0.993234 | 0.000667 | 1.776   |
| gnl UG Ssc#S26727199 | brown         | 146.9458 | 44.7824 | 0.854152 | 0.06538  | 7.526   |
| gnl UG Ssc#S26727288 | yellow        | 224.8157 | 69.5299 | 0.87945  | 0.049326 | 1.288   |
| gnl UG Ssc#S26727794 | lightgreen    | 306.0872 | 59.6707 | 0.993877 | 0.000575 | 6.976   |
| gnl UG Ssc#S26727819 | blue          | 896.0655 | 237.986 | 0.97523  | 0.004662 | 14.316  |
| gnl UG Ssc#S26727906 | white         | 174.3338 | 21.4636 | 0.725768 | 0.165115 | 5.776   |
| gnl UG Ssc#S26727931 | yellow        | 303.5753 | 117.957 | 0.996872 | 0.00021  | 2.89    |
| gnl UG Ssc#S26728087 | white         | 941.2102 | 29.4749 | 0.803757 | 0.10123  | 14.476  |
| gnl UG Ssc#S26728282 | magenta       | 226.2826 | 73.9175 | 0.975823 | 0.004496 | 7.472   |
| gnl UG Ssc#S26728690 | turquoise     | 433.7127 | 145.995 | 0.811035 | 0.095762 | 14.588  |
| gnl UG Ssc#S26729898 | yellow        | 308.2809 | 115.12  | 0.988672 | 0.001445 | 17.932  |
| gnl UG Ssc#S26731491 | turquoise     | 175.9891 | 47.85   | 0.510625 | 0.379328 | 52.868  |
| gnl UG Ssc#S26731505 | white         | 896.3377 | 29.0552 | 0.827275 | 0.083904 | 2.54    |
| gnl UG Ssc#S26732538 | yellowgreen   | 188.0926 | 17.6343 | 0.982003 | 0.00289  | 5.038   |
| gnl UG Ssc#S26732732 | yellow        | 294.9456 | 106.356 | 0.970215 | 0.006143 | 8.4     |
| gnl UG Ssc#S26732741 | greenyellow   | 238.0478 | 47.0763 | 0.954865 | 0.011433 | 118.052 |
| gnl UG Ssc#S26733049 | pink          | 82.53162 | 16.9298 | 0.46015  | 0.435507 | 10.636  |
| gnl UG Ssc#S26733269 | tan           | 660.9035 | 50.3053 | 0.93255  | 0.020815 | 59.864  |
| gnl UG Ssc#S26733360 | darkorange    | 158.2259 | 7.14669 | 0.266389 | 0.664878 | 2.244   |

|                      |             |          |         |          |          |         |
|----------------------|-------------|----------|---------|----------|----------|---------|
| gnl UG Ssc#S26733687 | violet      | 960.7978 | 72.969  | 0.993161 | 0.000678 | 23.122  |
| gnl UG Ssc#S26733977 | black       | 865.5135 | 84.3526 | 0.966408 | 0.007354 | 19.6    |
| gnl UG Ssc#S26734385 | yellow      | 234.0636 | 77.1102 | 0.901358 | 0.036635 | 11.004  |
| gnl UG Ssc#S26734441 | turquoise   | 394.3916 | 132.098 | 0.780759 | 0.119095 | 42.366  |
| gnl UG Ssc#S26734833 | magenta     | 275.2895 | 76.6895 | 0.983832 | 0.002462 | 7.172   |
| gnl UG Ssc#S26735067 | pink        | 228.7544 | 69.3203 | 0.985368 | 0.00212  | 5.472   |
| gnl UG Ssc#S26735228 | blue        | 700.2607 | 207.813 | 0.945771 | 0.015035 | 7.47    |
| gnl UG Ssc#S26735265 | magenta     | 211.2756 | 62.5063 | 0.942014 | 0.016615 | 6.202   |
| gnl UG Ssc#S26735527 | green       | 170.2101 | 18.0808 | 0.024888 | 0.968314 | 3.32    |
| gnl UG Ssc#S27598976 | turquoise   | 98.03708 | 27.3723 | 0.330175 | 0.587377 | 0.678   |
| gnl UG Ssc#S27599980 | blue        | 821.5472 | 242.762 | 0.978992 | 0.003644 | 35.236  |
| gnl UG Ssc#S27600018 | turquoise   | 711.8718 | 213.403 | 0.93465  | 0.019856 | 21.078  |
| gnl UG Ssc#S27600022 | pink        | 241.2608 | 66.0009 | 0.969974 | 0.006218 | 26.236  |
| gnl UG Ssc#S27600466 | violet      | 993.1651 | 71.3896 | 0.988629 | 0.001453 | 57.024  |
| gnl UG Ssc#S27600517 | grey60      | 965.3017 | 61.1066 | 0.99109  | 0.001008 | 54.14   |
| gnl UG Ssc#S27600920 | lightyellow | 941.3649 | 63.218  | 0.998976 | 3.93E-05 | 17.05   |
| gnl UG Ssc#S27600966 | black       | 923.3123 | 86.6365 | 0.971713 | 0.005687 | 54.968  |
| gnl UG Ssc#S27601215 | turquoise   | 378.5071 | 120.878 | 0.744436 | 0.149002 | 18.118  |
| gnl UG Ssc#S27602031 | lightyellow | 988.5575 | 62.3047 | 0.995998 | 0.000304 | 4.494   |
| gnl UG Ssc#S27602037 | red         | 446.8265 | 106.448 | 0.991246 | 0.000982 | 26.994  |
| gnl UG Ssc#S27602440 | turquoise   | 754.723  | 227.985 | 0.943948 | 0.015795 | 27.744  |
| gnl UG Ssc#S27604329 | red         | 430.9721 | 87.0908 | 0.947458 | 0.014343 | 10.864  |
| gnl UG Ssc#S29456864 | turquoise   | 831.9026 | 258.9   | 0.955723 | 0.011109 | 8.582   |
| gnl UG Ssc#S29456965 | brown       | 78.46765 | 30.4764 | 0.710713 | 0.178451 | 140.122 |
| gnl UG Ssc#S29459150 | darkgrey    | 174.6356 | 30.5818 | 0.968694 | 0.006618 | 9.91    |
| gnl UG Ssc#S29461992 | turquoise   | 799.8677 | 253.289 | 0.945014 | 0.01535  | 202.002 |
| gnl UG Ssc#S29462637 | orange      | 441.9662 | 34.5965 | 0.991154 | 0.000997 | 59.002  |
| gnl UG Ssc#S29465510 | pink        | 147.8    | 43.9855 | 0.877893 | 0.050272 | 3537.64 |
| gnl UG Ssc#S29974082 | darkred     | 280.6116 | 43.0117 | 0.989191 | 0.001347 | 6.394   |
| gnl UG Ssc#S29975107 | yellow      | 287.8253 | 109.958 | 0.977169 | 0.004127 | 1.5     |
| gnl UG Ssc#S29975173 | violet      | 892.5988 | 73.012  | 0.993171 | 0.000677 | 14.282  |
| gnl UG Ssc#S29978365 | lightcyan   | 140.6026 | 8.74796 | 0.663642 | 0.221978 | 27.912  |
| gnl UG Ssc#S29978506 | blue        | 820.9021 | 239.974 | 0.978846 | 0.003682 | 28.286  |
| gnl UG Ssc#S29978907 | lightgreen  | 279.1075 | 56.6706 | 0.983257 | 0.002594 | 2.596   |
| gnl UG Ssc#S29979645 | turquoise   | 278.5004 | 75.4266 | 0.590664 | 0.294308 | 4.344   |
| gnl UG Ssc#S29979787 | magenta     | 246.8134 | 77.5231 | 0.985787 | 0.00203  | 4.09    |
| gnl UG Ssc#S29980641 | yellow      | 296.6656 | 114.563 | 0.99063  | 0.001087 | 0.834   |
| gnl UG Ssc#S29981643 | turquoise   | 466.1095 | 112.109 | 0.723058 | 0.167494 | 61.202  |
| gnl UG Ssc#S29983891 | turquoise   | 412.6119 | 89.5117 | 0.703541 | 0.184908 | 9.934   |
| gnl UG Ssc#S29984324 | darkred     | 212.529  | 37.8656 | 0.947639 | 0.014269 | 121.736 |
| gnl UG Ssc#S29988216 | turquoise   | 472.5575 | 157.741 | 0.814865 | 0.092923 | 54.938  |
| gnl UG Ssc#S29988897 | salmon      | 181.5176 | 33.5321 | 0.884874 | 0.046073 | 12.456  |
| gnl UG Ssc#S29989732 | brown       | 203.4121 | 26.0973 | 0.569807 | 0.315935 | 69.002  |
| gnl UG Ssc#S29989765 | blue        | 653.8764 | 201.606 | 0.935593 | 0.019431 | 15.504  |
| gnl UG Ssc#S29989903 | salmon      | 145.5046 | 36.1715 | 0.90468  | 0.034818 | 13.042  |
| gnl UG Ssc#S29990179 | red         | 709.0695 | 95.0023 | 0.965042 | 0.007805 | 14.768  |
| gnl UG Ssc#S31101544 | brown       | 231.0961 | 19.9365 | 0.451558 | 0.445244 | 116.304 |
| gnl UG Ssc#S31101703 | skyblue     | 253.54   | 31.6862 | 0.990419 | 0.001124 | 17.69   |

|                      |               |          |         |          |          |         |
|----------------------|---------------|----------|---------|----------|----------|---------|
| gnl UG Ssc#S31101896 | blue          | 819.9466 | 193.235 | 0.924578 | 0.024581 | 45.196  |
| gnl UG Ssc#S31101963 | turquoise     | 625.0038 | 199.044 | 0.886753 | 0.044963 | 4.286   |
| gnl UG Ssc#S31102048 | brown         | 94.29746 | 28.9709 | 0.642769 | 0.242099 | 4.792   |
| gnl UG Ssc#S31102193 | lightgreen    | 301.7578 | 58.372  | 0.989349 | 0.001317 | 2.832   |
| gnl UG Ssc#S31102306 | lightyellow   | 838.6326 | 58.9372 | 0.98483  | 0.002238 | 7.842   |
| gnl UG Ssc#S31102841 | darkgreen     | 267.3822 | 33.8002 | 0.954361 | 0.011624 | 1.53    |
| gnl UG Ssc#S31102878 | purple        | 224.5293 | 17.3501 | -0.63376 | 0.250929 | 1.158   |
| gnl UG Ssc#S31103021 | yellow        | 309.9835 | 117.805 | 0.994847 | 0.000444 | 2.494   |
| gnl UG Ssc#S31103335 | darkred       | 255.3849 | 18.3564 | 0.784788 | 0.115902 | 17.284  |
| gnl UG Ssc#S31104316 | turquoise     | 515.3315 | 111.563 | 0.745324 | 0.148248 | 10.326  |
| gnl UG Ssc#S31105561 | salmon        | 157.1084 | 47.448  | 0.974617 | 0.004836 | 16.318  |
| gnl UG Ssc#S31106386 | blue          | 773.1439 | 170.267 | 0.896168 | 0.039532 | 12.53   |
| gnl UG Ssc#S31106760 | green         | 103.1718 | 37.6396 | 0.837047 | 0.077005 | 19.748  |
| gnl UG Ssc#S31106968 | navy          | 155.569  | 36.175  | 0.940866 | 0.017108 | 27.204  |
| gnl UG Ssc#S31107252 | sienna3       | 885.9463 | 24.8686 | 0.990368 | 0.001133 | 11.92   |
| gnl UG Ssc#S31107413 | sienna3       | 974.6493 | 25.9924 | 0.999026 | 3.65E-05 | 4.628   |
| gnl UG Ssc#S31107757 | red           | 367.5818 | 90.0479 | 0.954672 | 0.011506 | 56.602  |
| gnl UG Ssc#S31110463 | orange        | 650.0858 | 30.3804 | 0.962648 | 0.008617 | 5.164   |
| gnl UG Ssc#S31111456 | darkgreen     | 295.2207 | 34.8216 | 0.974724 | 0.004806 | 6.89    |
| gnl UG Ssc#S31112286 | darkturquoise | 155.4227 | 22.9206 | 0.879125 | 0.049522 | 0.944   |
| gnl UG Ssc#S31113853 | black         | 870.1043 | 91.8726 | 0.983285 | 0.002588 | 26.368  |
| gnl UG Ssc#S31114103 | green         | 96.96647 | 39.7972 | 0.826904 | 0.084169 | 86.898  |
| gnl UG Ssc#S31114178 | turquoise     | 387.961  | 92.4965 | 0.670056 | 0.215892 | 17.474  |
| gnl UG Ssc#S31114666 | skyblue       | 236.4502 | 30.1751 | 0.978283 | 0.003829 | 20.854  |
| gnl UG Ssc#S31115183 | paleturquoise | 219.8711 | 17.253  | 0.91314  | 0.030326 | 16.224  |
| gnl UG Ssc#S31116110 | darkgreen     | 277.0545 | 33.0915 | 0.955773 | 0.011091 | 8.528   |
| gnl UG Ssc#S31116114 | brown         | 45.67899 | 14.8572 | 0.442671 | 0.455365 | 49.594  |
| gnl UG Ssc#S31116402 | lightcyan     | 180.485  | 26.0683 | 0.869268 | 0.055616 | 14.596  |
| gnl UG Ssc#S31116518 | darkgrey      | 189.8588 | 34.9977 | 0.997247 | 0.000173 | 14.844  |
| gnl UG Ssc#S31117514 | green         | 87.48882 | 38.8553 | 0.828647 | 0.082924 | 2.19    |
| gnl UG Ssc#S31117548 | midnightblue  | 132.0562 | 43.0904 | 0.97855  | 0.003759 | 3.24    |
| gnl UG Ssc#S31118802 | blue          | 710.0202 | 186.973 | 0.922654 | 0.02552  | 12.272  |
| gnl UG Ssc#S31119321 | yellow        | 305.1557 | 115.861 | 0.990529 | 0.001105 | 7.134   |
| gnl UG Ssc#S31119453 | yellow        | 263.5425 | 89.6116 | 0.93166  | 0.021225 | 22.9    |
| gnl UG Ssc#S31120438 | grey          | 278.0216 | 11.0733 | 0.280837 | 0.647185 | 16.044  |
| gnl UG Ssc#S31120524 | darkgreen     | 259.2622 | 22.1274 | 0.845895 | 0.070918 | 3.904   |
| gnl UG Ssc#S31120797 | magenta       | 297.2288 | 51.1241 | 0.893514 | 0.04104  | 11.138  |
| gnl UG Ssc#S31120805 | turquoise     | 743.053  | 233.526 | 0.95109  | 0.012889 | 4.288   |
| gnl UG Ssc#S31121045 | midnightblue  | 127.8585 | 43.1335 | 0.975759 | 0.004514 | 359.504 |
| gnl UG Ssc#S31121529 | darkgreen     | 249.3967 | 34.2625 | 0.953966 | 0.011774 | 26.146  |
| gnl UG Ssc#S31122375 | lightgreen    | 290.8026 | 59.0561 | 0.991858 | 0.000881 | 2.356   |
| gnl UG Ssc#S31122377 | darkred       | 211.3632 | 12.7877 | 0.688287 | 0.198856 | 25.18   |
| gnl UG Ssc#S31122485 | darkgrey      | 175.723  | 30.4726 | 0.964775 | 0.007894 | 18.246  |
| gnl UG Ssc#S31123459 | brown         | 221.1788 | 44.661  | 0.747511 | 0.146394 | 10.346  |
| gnl UG Ssc#S31123943 | black         | 980.1157 | 99.1379 | 0.999054 | 3.49E-05 | 6.012   |
| gnl UG Ssc#S31124004 | royalblue     | 123.3307 | 1.39659 | -0.24315 | 0.693494 | 44.904  |
| gnl UG Ssc#S31124539 | turquoise     | 276.5324 | 88.0642 | 0.622339 | 0.262246 | 11.722  |
| gnl UG Ssc#S31124838 | turquoise     | 634.3644 | 177.469 | 0.87902  | 0.049586 | 1.808   |

|                      |               |          |         |          |          |        |
|----------------------|---------------|----------|---------|----------|----------|--------|
| gnl UG Ssc#S31125030 | paleturquoise | 99.68591 | 6.98786 | 0.732337 | 0.15939  | 9.088  |
| gnl UG Ssc#S31125151 | turquoise     | 887.0193 | 264.507 | 0.978893 | 0.003669 | 38.376 |
| gnl UG Ssc#S31129394 | black         | 938.7055 | 97.5624 | 0.996156 | 0.000286 | 16.642 |
| gnl UG Ssc#S31131447 | turquoise     | 593.7216 | 151.73  | 0.818482 | 0.090265 | 15.338 |
| gnl UG Ssc#S31133289 | lightgreen    | 283.8522 | 60.4054 | 0.99641  | 0.000258 | 0.252  |
| gnl UG Ssc#S31133660 | greenyellow   | 185.5109 | 33.1824 | 0.869237 | 0.055635 | 15.784 |
| gnl UG Ssc#S31133723 | lightcyan     | 107.7592 | 10.5353 | 0.682688 | 0.204046 | 183.51 |
| gnl UG Ssc#S31133867 | green         | 91.93454 | 13.0798 | 0.37033  | 0.539492 | 1.144  |
| gnl UG Ssc#S31133980 | pink          | 91.8409  | 15.5846 | 0.171614 | 0.782572 | 6.454  |
| gnl UG Ssc#S31986337 | brown         | 179.4854 | 57.1034 | 0.940301 | 0.017352 | 42.794 |
| gnl UG Ssc#S32382339 | blue          | 790.6034 | 230.918 | 0.965706 | 0.007584 | 3.092  |
| gnl UG Ssc#S32389412 | brown         | 83.43805 | 35.7001 | 0.735027 | 0.157063 | 2.83   |
| gnl UG Ssc#S32419644 | midnightblue  | 140.8034 | 46.0205 | 0.993667 | 0.000604 | 399.53 |
| gnl UG Ssc#S32771805 | brown         | 221.7502 | 61.5938 | 0.950811 | 0.012999 | 10.662 |
| gnl UG Ssc#S32800726 | midnightblue  | 153.8628 | 36.3522 | 0.948967 | 0.013733 | 7.542  |
| gnl UG Ssc#S32800732 | navy          | 202.0015 | 9.90008 | -0.66794 | 0.217895 | 98.376 |
| gnl UG Ssc#S34494848 | white         | 165.7491 | 20.4031 | 0.71982  | 0.170349 | 2.312  |
| gnl UG Ssc#S34495212 | blue          | 685.974  | 210.298 | 0.945838 | 0.015008 | 2.838  |
| gnl UG Ssc#S34495586 | magenta       | 190.6629 | 60.5537 | 0.932983 | 0.020616 | 3.526  |
| gnl UG Ssc#S34496141 | greenyellow   | 224.3289 | 46.582  | 0.957298 | 0.010525 | 1.19   |
| gnl UG Ssc#S34497940 | yellow        | 235.4245 | 77.7632 | 0.899161 | 0.037853 | 5.032  |
| gnl UG Ssc#S34497945 | darkturquoise | 194.1598 | 34.8629 | 0.994658 | 0.000468 | 3.668  |
| gnl UG Ssc#S34499792 | lightgreen    | 288.7002 | 59.9329 | 0.994785 | 0.000452 | 2.11   |
| gnl UG Ssc#S34500484 | yellow        | 258.7949 | 93.2459 | 0.940919 | 0.017085 | 5.348  |
| gnl UG Ssc#S34501706 | midnightblue  | 210.2888 | 37.5196 | 0.937975 | 0.01837  | 54.564 |
| gnl UG Ssc#S34501858 | turquoise     | 153.4636 | 39.552  | 0.42515  | 0.475463 | 1.758  |
| gnl UG Ssc#S34502088 | tan           | 971.94   | 68.0118 | 0.995577 | 0.000353 | 25.91  |
| gnl UG Ssc#S34504168 | purple        | 161.5956 | 13.9757 | -0.81019 | 0.096396 | 39.532 |
| gnl UG Ssc#S34507193 | yellow        | 187.3276 | 59.1244 | 0.824359 | 0.085997 | 1.652  |
| gnl UG Ssc#S34507225 | darkred       | 262.8989 | 45.2166 | 0.998256 | 8.74E-05 | 2.408  |
| gnl UG Ssc#S34507478 | pink          | 88.03299 | 16.7447 | 0.259017 | 0.673935 | 11.03  |
| gnl UG Ssc#S34508066 | brown         | 177.4394 | 47.4628 | 0.782218 | 0.117936 | 8.276  |
| gnl UG Ssc#S34509005 | paleturquoise | 164.4035 | 15.6428 | 0.882283 | 0.047618 | 3.546  |
| gnl UG Ssc#S34509766 | midnightblue  | 183.7956 | 37.6607 | 0.947985 | 0.014129 | 52.672 |
| gnl UG Ssc#S34509960 | lightgreen    | 294.9034 | 60.7937 | 0.997707 | 0.000132 | 28.15  |
| gnl UG Ssc#S34510245 | salmon        | 384.3988 | 35.4125 | 0.896811 | 0.039169 | 46.672 |
| gnl UG Ssc#S34511316 | yellow        | 241.3126 | 85.0673 | 0.915278 | 0.029223 | 5.978  |
| gnl UG Ssc#S34511666 | blue          | 720.3936 | 219.611 | 0.953873 | 0.01181  | 16.588 |
| gnl UG Ssc#S34512569 | turquoise     | 279.5379 | 95.9684 | 0.671558 | 0.214474 | 26.752 |
| gnl UG Ssc#S34512723 | pink          | 254.4123 | 74.3373 | 0.996513 | 0.000247 | 5.968  |
| gnl UG Ssc#S34512833 | greenyellow   | 172.908  | 52.6377 | 0.987255 | 0.001724 | 17.978 |
| gnl UG Ssc#S34512837 | blue          | 609.873  | 171.552 | 0.904584 | 0.03487  | 3.504  |
| gnl UG Ssc#S34513996 | blue          | 757.5638 | 223.934 | 0.957081 | 0.010605 | 34.608 |
| gnl UG Ssc#S34516183 | brown         | 240.0799 | 56.4866 | 0.882093 | 0.047732 | 6.936  |
| gnl UG Ssc#S34516266 | grey60        | 926.6777 | 61.4843 | 0.99241  | 0.000793 | 10.68  |
| gnl UG Ssc#S34516411 | royalblue     | 151.4064 | 2.6849  | 0.179099 | 0.77319  | 13.76  |
| gnl UG Ssc#S34517157 | greenyellow   | 216.7802 | 49.3505 | 0.966615 | 0.007286 | 5.716  |
| gnl UG Ssc#S34517367 | navy          | 189.6252 | 33.2205 | 0.889497 | 0.043357 | 48.486 |

|                      |               |          |         |          |          |         |
|----------------------|---------------|----------|---------|----------|----------|---------|
| gnl UG Ssc#S34517412 | turquoise     | 634.7996 | 177.73  | 0.864956 | 0.058351 | 30.182  |
| gnl UG Ssc#S34517549 | yellow        | 287.0104 | 107.483 | 0.972293 | 0.005513 | 12.152  |
| gnl UG Ssc#S34517830 | turquoise     | 480.3762 | 104.557 | 0.739882 | 0.152888 | 11.002  |
| gnl UG Ssc#S34518344 | midnightblue  | 199.3508 | 39.6594 | 0.958397 | 0.010123 | 5.94    |
| gnl UG Ssc#S34521601 | blue          | 620.1669 | 146.251 | 0.86171  | 0.060437 | 29.364  |
| gnl UG Ssc#S34521876 | green         | 138.4643 | 20.9194 | 0.230224 | 0.709481 | 8.104   |
| gnl UG Ssc#S34521911 | purple        | 176.9354 | 14.1152 | -0.66826 | 0.217587 | 3.936   |
| gnl UG Ssc#S34524449 | yellow        | 302.7561 | 111.57  | 0.980134 | 0.003351 | 7.85    |
| gnl UG Ssc#S34527542 | yellow        | 306.1823 | 118.303 | 0.996223 | 0.000279 | 9.302   |
| gnl UG Ssc#S34527926 | purple        | 55.12121 | 11.0837 | 0.642902 | 0.24197  | 36.13   |
| gnl UG Ssc#S34528484 | white         | 187.2001 | 21.3929 | 0.666056 | 0.219682 | 3.986   |
| gnl UG Ssc#S34528527 | yellowgreen   | 204.6885 | 16.1232 | 0.963733 | 0.008245 | 52.902  |
| gnl UG Ssc#S34529071 | darkturquoise | 203.7191 | 34.6316 | 0.993971 | 0.000561 | 2.208   |
| gnl UG Ssc#S34529284 | magenta       | 240.6062 | 75.2678 | 0.979647 | 0.003475 | 38.758  |
| gnl UG Ssc#S34529469 | turquoise     | 553.4605 | 128.663 | 0.789353 | 0.112316 | 7.304   |
| gnl UG Ssc#S34529519 | darkgreen     | 231.0326 | 16.2437 | 0.732387 | 0.159347 | 2.198   |
| gnl UG Ssc#S34530765 | blue          | 795.1638 | 235.727 | 0.971827 | 0.005652 | 11.952  |
| gnl UG Ssc#S34530890 | brown         | 88.82947 | 31.9919 | 0.639653 | 0.245144 | 99.448  |
| gnl UG Ssc#S34531282 | purple        | 209.0827 | 16.0185 | -0.80342 | 0.101487 | 16.204  |
| gnl UG Ssc#S34531946 | lightgreen    | 299.6601 | 60.9994 | 0.998358 | 7.99E-05 | 1.3     |
| gnl UG Ssc#S34532310 | paleturquoise | 152.4686 | 15.8573 | 0.888202 | 0.044113 | 2.92    |
| gnl UG Ssc#S34534055 | black         | 978.5305 | 98.202  | 0.997196 | 0.000178 | 22.07   |
| gnl UG Ssc#S35167355 | pink          | 284.4324 | 71.0961 | 0.969344 | 0.006414 | 10.614  |
| gnl UG Ssc#S35167435 | darkgrey      | 226.3774 | 28.4253 | 0.950971 | 0.012936 | 3.898   |
| gnl UG Ssc#S35167565 | magenta       | 208.3046 | 66.2459 | 0.95204  | 0.012517 | 20.37   |
| gnl UG Ssc#S35169073 | greenyellow   | 208.0021 | 39.9514 | 0.916887 | 0.028402 | 5.798   |
| gnl UG Ssc#S35169280 | brown         | 123.1408 | 37.2247 | 0.845453 | 0.071218 | 14.2    |
| gnl UG Ssc#S35171904 | blue          | 886.8388 | 196.94  | 0.934286 | 0.020021 | 132.418 |
| gnl UG Ssc#S35173121 | blue          | 904.0127 | 254.412 | 0.992297 | 0.000811 | 5.128   |
| gnl UG Ssc#S35173188 | salmon        | 125.5069 | 36.8783 | 0.913777 | 0.029996 | 5.85    |
| gnl UG Ssc#S35173683 | greenyellow   | 170.1435 | 38.918  | 0.908149 | 0.032952 | 35.368  |
| gnl UG Ssc#S35321865 | greenyellow   | 178.1697 | 46.8744 | 0.95923  | 0.009821 | 57.066  |
| gnl UG Ssc#S35322082 | midnightblue  | 75.5719  | 26.8853 | 0.877739 | 0.050366 | 61.242  |
| gnl UG Ssc#S35322980 | yellow        | 301.2055 | 109.332 | 0.975036 | 0.004717 | 5.53    |
| gnl UG Ssc#S35323577 | brown         | 203.1814 | 60.3555 | 0.847482 | 0.069843 | 38.184  |
| gnl UG Ssc#S35323988 | darkturquoise | 197.661  | 34.4044 | 0.992016 | 0.000855 | 6.808   |
| gnl UG Ssc#S35324071 | green         | 91.49753 | 43.7864 | 0.871202 | 0.054403 | 6.018   |
| gnl UG Ssc#S35324483 | tan           | 902.2321 | 50.0961 | 0.934914 | 0.019737 | 3.832   |
| gnl UG Ssc#S35325248 | grey60        | 963.7581 | 62.3711 | 0.995226 | 0.000396 | 3.808   |
| gnl UG Ssc#S35325791 | darkturquoise | 181.9611 | 29.6969 | 0.955091 | 0.011347 | 14.416  |
| gnl UG Ssc#S35326006 | darkturquoise | 177.1159 | 24.2878 | 0.89815  | 0.038417 | 18.568  |
| gnl UG Ssc#S35326333 | turquoise     | 711.2042 | 223.339 | 0.91192  | 0.030962 | 13.14   |
| gnl UG Ssc#S35326360 | purple        | 224.4929 | 20.0592 | -0.75241 | 0.142271 | 4.658   |
| gnl UG Ssc#S35326767 | violet        | 952.7028 | 73.9402 | 0.995788 | 0.000328 | 11.086  |
| gnl UG Ssc#S35327002 | midnightblue  | 121.2679 | 30.1973 | 0.884835 | 0.046096 | 13.03   |
| gnl UG Ssc#S35327790 | white         | 944.3869 | 29.7335 | 0.831677 | 0.080773 | 3.422   |
| gnl UG Ssc#S35328709 | turquoise     | 606.4171 | 161.29  | 0.837129 | 0.076948 | 15.332  |
| gnl UG Ssc#S35329402 | yellowgreen   | 187.8607 | 15.8187 | 0.958969 | 0.009915 | 333.972 |

|                      |               |          |         |          |          |         |
|----------------------|---------------|----------|---------|----------|----------|---------|
| gnl UG Ssc#S35329662 | yellow        | 231.443  | 77.4348 | 0.897695 | 0.038672 | 7.6     |
| gnl UG Ssc#S35330371 | pink          | 147.338  | 11.527  | 0.48376  | 0.409005 | 15.256  |
| gnl UG Ssc#S35331200 | greenyellow   | 176.824  | 33.6098 | 0.876874 | 0.050894 | 37.008  |
| gnl UG Ssc#S35331259 | purple        | 173.9167 | 16.2623 | -0.87683 | 0.050921 | 10.16   |
| gnl UG Ssc#S35332512 | greenyellow   | 193.6512 | 53.8785 | 0.990832 | 0.001052 | 4.73    |
| gnl UG Ssc#S35332920 | black         | 649.8045 | 65.9867 | 0.917051 | 0.028319 | 3.366   |
| gnl UG Ssc#S35332961 | darkturquoise | 167.0211 | 22.2636 | 0.880796 | 0.048512 | 3.808   |
| gnl UG Ssc#S35333026 | yellowgreen   | 131.3336 | 10.3514 | 0.86214  | 0.060159 | 17.464  |
| gnl UG Ssc#S35333447 | black         | 956.6357 | 82.4975 | 0.961441 | 0.009036 | 2.024   |
| gnl UG Ssc#S35334154 | violet        | 820.9608 | 68.3984 | 0.979935 | 0.003402 | 7.19    |
| gnl UG Ssc#S35334793 | tan           | 946.7173 | 67.4805 | 0.993783 | 0.000588 | 50.986  |
| gnl UG Ssc#S35337111 | greenyellow   | 234.3855 | 39.9619 | 0.917491 | 0.028095 | 13.014  |
| gnl UG Ssc#S35722094 | brown         | 135.1209 | 44.1401 | 0.85336  | 0.065905 | 52.126  |
| gnl UG Ssc#S35722541 | lightgreen    | 293.0922 | 60.2522 | 0.995904 | 0.000314 | 0.978   |
| gnl UG Ssc#S35723730 | turquoise     | 637.15   | 149.863 | 0.825501 | 0.085176 | 26.526  |
| gnl UG Ssc#S38479714 | yellow        | 251.7269 | 89.5784 | 0.928091 | 0.022897 | 3.224   |
| gnl UG Ssc#S38479741 | salmon        | 130.4519 | 39.8499 | 0.931103 | 0.021483 | 3.936   |
| gnl UG Ssc#S38479786 | blue          | 912.3716 | 234.814 | 0.971985 | 0.005605 | 60.226  |
| gnl UG Ssc#S38481918 | pink          | 197.7624 | 3.3094  | -0.87231 | 0.053713 | 20.198  |
| gnl UG Ssc#S38482154 | magenta       | 178.6893 | 55.6808 | 0.916202 | 0.028751 | 6.522   |
| gnl UG Ssc#S38482329 | blue          | 726.6445 | 141.883 | 0.861324 | 0.060686 | 26.004  |
| gnl UG Ssc#S39762052 | magenta       | 270.2545 | 81.0048 | 0.99605  | 0.000298 | 5.576   |
| gnl UG Ssc#S39765406 | red           | 534.0255 | 109.18  | 0.996669 | 0.000231 | 1.434   |
| gnl UG Ssc#S39769221 | purple        | 252.8571 | 16.438  | -0.64155 | 0.243288 | 11.42   |
| gnl UG Ssc#S39772429 | red           | 619.7867 | 94.6898 | 0.966136 | 0.007443 | 31.94   |
| gnl UG Ssc#S39773791 | green         | 121.4672 | 45.9056 | 0.905201 | 0.034535 | 209.562 |
| gnl UG Ssc#S39776911 | midnightblue  | 171.2048 | 38.2785 | 0.937578 | 0.018545 | 43.092  |
| gnl UG Ssc#S39777926 | darkorange    | 119.6775 | 18.536  | 0.910402 | 0.031758 | 499.754 |
| gnl UG Ssc#S39778104 | pink          | 203.0373 | 60.6394 | 0.958975 | 0.009913 | 45.564  |
| gnl UG Ssc#S39778806 | blue          | 942.0153 | 216.696 | 0.95454  | 0.011556 | 19.222  |
| gnl UG Ssc#S39781881 | turquoise     | 975.4983 | 269.366 | 0.999052 | 3.50E-05 | 31.762  |
| gnl UG Ssc#S39785088 | pink          | 225.9812 | 67.617  | 0.979734 | 0.003453 | 15.99   |
| gnl UG Ssc#S39789448 | yellowgreen   | 190.6921 | 17.0706 | 0.978858 | 0.003678 | 1.628   |
| gnl UG Ssc#S39791419 | skyblue       | 284.3206 | 31.1351 | 0.986946 | 0.001787 | 3.454   |
| gnl UG Ssc#S39793738 | darkturquoise | 192.0136 | 26.8795 | 0.928233 | 0.022829 | 1.836   |
| gnl UG Ssc#S39794612 | grey60        | 946.7049 | 61.5734 | 0.992646 | 0.000756 | 15.858  |
| gnl UG Ssc#S39794773 | orange        | 527.0395 | 31.024  | 0.966417 | 0.00735  | 229.574 |
| gnl UG Ssc#S39796976 | tan           | 976.4411 | 66.3166 | 0.989797 | 0.001235 | 8.206   |
| gnl UG Ssc#S39797758 | green         | 130.7919 | 49.408  | 0.929528 | 0.022219 | 6.962   |
| gnl UG Ssc#S39801969 | grey60        | 991.6185 | 59.469  | 0.985453 | 0.002101 | 15.488  |
| gnl UG Ssc#S39803451 | red           | 596.2598 | 90.6615 | 0.95469  | 0.011499 | 7.282   |
| gnl UG Ssc#S39805483 | lightcyan     | 262.0721 | 34.6038 | 0.953058 | 0.012123 | 21.486  |
| gnl UG Ssc#S39808414 | pink          | 279.1731 | 73.8233 | 0.984242 | 0.002369 | 5.34    |
| gnl UG Ssc#S39812694 | green         | 135.8693 | 19.8159 | 0.147907 | 0.812368 | 1.704   |
| gnl UG Ssc#S39833372 | tan           | 950.836  | 65.0015 | 0.986067 | 0.00197  | 11.446  |
| gnl UG Ssc#S39833392 | turquoise     | 683.5968 | 225.525 | 0.898765 | 0.038073 | 22.98   |
| gnl UG Ssc#S39835484 | pink          | 199.818  | 58.0342 | 0.951941 | 0.012556 | 10.286  |
| gnl UG Ssc#S39835999 | blue          | 678.8467 | 150.519 | 0.873436 | 0.053012 | 1.146   |

|                      |               |          |         |          |          |         |
|----------------------|---------------|----------|---------|----------|----------|---------|
| gnl UG Ssc#S39836829 | turquoise     | 818.1038 | 237.515 | 0.952585 | 0.012305 | 73.178  |
| gnl UG Ssc#S39836895 | brown         | 151.8202 | 18.411  | 0.552161 | 0.334534 | 30.026  |
| gnl UG Ssc#S39838237 | orange        | 217.0726 | 27.237  | 0.935977 | 0.019258 | 31.512  |
| gnl UG Ssc#S39839709 | turquoise     | 503.1783 | 168.279 | 0.850238 | 0.067988 | 9.976   |
| gnl UG Ssc#S39839769 | turquoise     | 906.3585 | 259.931 | 0.972776 | 0.00537  | 4.58    |
| gnl UG Ssc#S39840475 | greenyellow   | 167.7066 | 44.6873 | 0.946578 | 0.014703 | 7.566   |
| gnl UG Ssc#S39841126 | violet        | 929.4696 | 74.6499 | 0.997668 | 0.000135 | 3.624   |
| gnl UG Ssc#S39841622 | brown         | 226.8707 | 21.4342 | 0.453099 | 0.443493 | 16.756  |
| gnl UG Ssc#S39842447 | turquoise     | 380.579  | 126.276 | 0.783247 | 0.11712  | 173.914 |
| gnl UG Ssc#S39842527 | magenta       | 249.6542 | 76.9568 | 0.984224 | 0.002373 | 7.066   |
| gnl UG Ssc#S39844514 | turquoise     | 779.9832 | 233.647 | 0.954182 | 0.011692 | 13.246  |
| gnl UG Ssc#S39858087 | turquoise     | 792.4283 | 253.897 | 0.947864 | 0.014178 | 30.932  |
| gnl UG Ssc#S39861498 | lightcyan     | 307.6268 | 42.4946 | 0.973523 | 0.005151 | 310.304 |
| gnl UG Ssc#S39863250 | blue          | 792.7405 | 222.865 | 0.96059  | 0.009336 | 4.552   |
| gnl UG Ssc#S39866181 | green         | 65.22481 | 34.235  | 0.771182 | 0.126786 | 2.06    |
| gnl UG Ssc#S39871294 | purple        | 224.7477 | 12.6171 | -0.59707 | 0.287746 | 2.4     |
| gnl UG Ssc#S39883528 | turquoise     | 383.3612 | 87.1414 | 0.686237 | 0.200752 | 27.73   |
| gnl UG Ssc#S39886474 | darkred       | 284.115  | 43.9384 | 0.993642 | 0.000608 | 3.76    |
| gnl UG Ssc#S39888860 | turquoise     | 542.0468 | 157.14  | 0.823837 | 0.086374 | 19.186  |
| gnl UG Ssc#S39889520 | red           | 713.2749 | 95.4905 | 0.96597  | 0.007497 | 105.844 |
| gnl UG Ssc#S39891101 | midnightblue  | 121.6167 | 28.857  | 0.871544 | 0.054189 | 19.574  |
| gnl UG Ssc#S39891679 | navy          | 135.7055 | 42.5713 | 0.94988  | 0.013368 | 8.08    |
| gnl UG Ssc#S39892044 | turquoise     | 694.484  | 228.504 | 0.902358 | 0.036085 | 9.482   |
| gnl UG Ssc#S39892248 | lightgreen    | 258.0027 | 53.5481 | 0.971914 | 0.005626 | 10.304  |
| gnl UG Ssc#S39929154 | lightgreen    | 275.619  | 55.3653 | 0.978687 | 0.003723 | 9.202   |
| gnl UG Ssc#S39943227 | paleturquoise | 151.8686 | 14.4228 | 0.87336  | 0.053059 | 5.828   |
| gnl UG Ssc#S39943772 | lightgreen    | 306.2232 | 59.8377 | 0.994451 | 0.000496 | 1.862   |
| gnl UG Ssc#S39944894 | darkred       | 241.632  | 44.3217 | 0.991825 | 0.000886 | 6.706   |
| gnl UG Ssc#S39946921 | orange        | 245.5991 | 29.1631 | 0.954676 | 0.011504 | 106.666 |
| gnl UG Ssc#S39947174 | green         | 191.4758 | 16.6121 | 0.132832 | 0.831371 | 3.75    |
| gnl UG Ssc#S39950607 | darkturquoise | 169.8191 | 32.6573 | 0.97703  | 0.004164 | 0.85    |
| gnl UG Ssc#S39951148 | darkred       | 272.0494 | 42.5935 | 0.98609  | 0.001965 | 4.446   |
| gnl UG Ssc#S39951768 | navy          | 268.5991 | 26.7184 | 0.732999 | 0.158817 | 11.606  |
| gnl UG Ssc#S39954477 | grey          | 156.1286 | 14.8495 | -0.94742 | 0.014357 | 5.69    |
| gnl UG Ssc#S39957439 | darkgrey      | 182.9559 | 1.26996 | 0.18041  | 0.771548 | 10.858  |
| gnl UG Ssc#S39958727 | darkgrey      | 216.1391 | 1.50605 | 0.253916 | 0.680212 | 13.712  |
| gnl UG Ssc#S39959416 | blue          | 595.3346 | 162.689 | 0.892199 | 0.041794 | 7.174   |
| gnl UG Ssc#S39961595 | blue          | 862.2    | 225.494 | 0.96441  | 0.008017 | 11.134  |
| gnl UG Ssc#S39969872 | yellow        | 297.6665 | 106.19  | 0.970332 | 0.006107 | 53.674  |
| gnl UG Ssc#S39970588 | midnightblue  | 91.95082 | 5.03951 | -0.49563 | 0.395828 | 7.47    |
| gnl UG Ssc#S39979082 | blue          | 910.0972 | 228.784 | 0.964372 | 0.00803  | 32.234  |
| gnl UG Ssc#S39979866 | green         | 118.5485 | 56.3462 | 0.966339 | 0.007376 | 48.794  |
| gnl UG Ssc#S39980362 | darkgrey      | 154.982  | 23.9605 | 0.91632  | 0.028691 | 1.652   |
| gnl UG Ssc#S39982552 | midnightblue  | 130.564  | 37.8824 | 0.939859 | 0.017544 | 2343.14 |
| gnl UG Ssc#S39984038 | red           | 475.4838 | 101.101 | 0.979654 | 0.003473 | 40.432  |
| gnl UG Ssc#S39984272 | turquoise     | 497.688  | 166.453 | 0.833353 | 0.079591 | 9.624   |
| gnl UG Ssc#S39984310 | pink          | 264.5653 | 75.5496 | 0.998359 | 7.98E-05 | 0.078   |
| gnl UG Ssc#S39984579 | brown         | 151.3436 | 38.5216 | 0.728348 | 0.162859 | 1.998   |

|                      |               |          |         |          |          |          |
|----------------------|---------------|----------|---------|----------|----------|----------|
| gnl UG Ssc#S39991834 | green         | 113.6992 | 46.7559 | 0.900585 | 0.037062 | 18.764   |
| gnl UG Ssc#S39993494 | darkorange    | 162.6142 | 9.31265 | 0.548256 | 0.338686 | 43.832   |
| gnl UG Ssc#S39994120 | brown         | 238.2651 | 20.282  | 0.500311 | 0.390659 | 13.306   |
| gnl UG Ssc#S39995034 | blue          | 712.2522 | 216.652 | 0.951518 | 0.012721 | 21.484   |
| gnl UG Ssc#S39996844 | brown         | 230.7681 | 52.9899 | 0.833236 | 0.079673 | 35.938   |
| gnl UG Ssc#S39998732 | blue          | 864.0924 | 247.475 | 0.982936 | 0.002669 | 6.786    |
| gnl UG Ssc#S39998964 | pink          | 275.2707 | 70.7803 | 0.975092 | 0.004701 | 2.818    |
| gnl UG Ssc#S39998988 | blue          | 879.0023 | 211.421 | 0.946033 | 0.014927 | 1232.612 |
| gnl UG Ssc#S40003052 | white         | 960.8431 | 28.7009 | 0.810678 | 0.096029 | 31.808   |
| gnl UG Ssc#S40004648 | blue          | 809.6943 | 214.213 | 0.946305 | 0.014815 | 21.434   |
| gnl UG Ssc#S40006091 | darkturquoise | 187.2181 | 32.4511 | 0.973321 | 0.00521  | 8.362    |
| gnl UG Ssc#S40016934 | turquoise     | 721.3704 | 229.28  | 0.90906  | 0.032467 | 2.962    |
| gnl UG Ssc#S40017556 | brown         | 225.2884 | 61.0028 | 0.89206  | 0.041874 | 1.828    |
| gnl UG Ssc#S40020159 | turquoise     | 703.729  | 230.91  | 0.908138 | 0.032958 | 477.274  |
| gnl UG Ssc#S40024674 | pink          | 264.4305 | 69.5841 | 0.974196 | 0.004957 | 10.714   |
| gnl UG Ssc#S40030592 | lightyellow   | 995.6453 | 62.3941 | 0.996277 | 0.000273 | 12.456   |
| gnl UG Ssc#S40034435 | lightgreen    | 292.2049 | 58.94   | 0.991325 | 0.000969 | 3.156    |
| gnl UG Ssc#S40034650 | turquoise     | 823.7525 | 259.912 | 0.957613 | 0.010409 | 20.04    |
| gnl UG Ssc#S40037863 | grey          | 88.2473  | 8.17219 | 0.040937 | 0.947892 | 47.162   |
| gnl UG Ssc#S40038955 | darkmagenta   | 974.7107 | 26.1385 | 0.986924 | 0.001791 | 477.792  |
| gnl UG Ssc#S40042081 | magenta       | 269.657  | 79.8187 | 0.992527 | 0.000775 | 3.846    |
| gnl UG Ssc#S40042631 | skyblue       | 362.6148 | 27.3763 | 0.959866 | 0.009593 | 16.734   |
| gnl UG Ssc#S40043958 | lightyellow   | 951.9098 | 63.2435 | 0.999063 | 3.44E-05 | 10.402   |
| gnl UG Ssc#S40045135 | skyblue       | 180.8773 | 28.5425 | 0.97089  | 0.005936 | 7.794    |
| gnl UG Ssc#S40045387 | salmon        | 189.3859 | 27.7234 | 0.837171 | 0.076918 | 20.494   |
| gnl UG Ssc#S40048435 | lightgreen    | 302.064  | 60.0087 | 0.995047 | 0.000418 | 4.352    |
| gnl UG Ssc#S40051540 | brown         | 191.7803 | 57.1047 | 0.827499 | 0.083744 | 5.566    |
| gnl UG Ssc#S40053273 | violet        | 937.5565 | 74.8492 | 0.998218 | 9.03E-05 | 13.494   |
| gnl UG Ssc#S40053418 | lightyellow   | 931.819  | 62.9438 | 0.998105 | 9.90E-05 | 11.978   |
| gnl UG Ssc#S40055771 | lightgreen    | 291.1002 | 58.2112 | 0.988811 | 0.001418 | 5.282    |
| gnl UG Ssc#S40056037 | midnightblue  | 132.3563 | 37.9473 | 0.941245 | 0.016945 | 23.94    |
| gnl UG Ssc#S40060840 | darkgrey      | 183.0089 | 34.2125 | 0.992309 | 0.000809 | 9.066    |
| gnl UG Ssc#S40064815 | grey          | 133.6754 | 12.5247 | 0.155865 | 0.802353 | 3.218    |
| gnl UG Ssc#S40064881 | lightcyan     | 165.0676 | 11.843  | 0.422286 | 0.478766 | 2.412    |
| gnl UG Ssc#S40066476 | purple        | 213.7565 | 18.1884 | 0.757459 | 0.138052 | 41.524   |
| gnl UG Ssc#S40068459 | grey          | 180.4566 | 8.14983 | 0.451176 | 0.445678 | 18.954   |
| gnl UG Ssc#S40069269 | skyblue       | 256.5053 | 30.9921 | 0.987984 | 0.001578 | 57.792   |
| gnl UG Ssc#S40070005 | magenta       | 268.122  | 78.2753 | 0.989333 | 0.00132  | 10.326   |
| gnl UG Ssc#S40072585 | darkgrey      | 191.748  | 34.9655 | 0.996489 | 0.00025  | 6.556    |
| gnl UG Ssc#S40073180 | navy          | 127.0726 | 37.413  | 0.904477 | 0.034928 | 31.682   |
| gnl UG Ssc#S40074206 | turquoise     | 658.4103 | 217.93  | 0.889745 | 0.043213 | 3.334    |
| gnl UG Ssc#S40077180 | pink          | 280.7104 | 68.7258 | 0.963354 | 0.008375 | 8.07     |
| gnl UG Ssc#S40079260 | darkgrey      | 179.4654 | 31.707  | 0.97478  | 0.00479  | 1.172    |
| gnl UG Ssc#S40081361 | brown         | 180.3054 | 20.7318 | 0.617464 | 0.267116 | 9.336    |
| gnl UG Ssc#S40081684 | red           | 686.1551 | 88.4297 | 0.949087 | 0.013685 | 1.022    |
| gnl UG Ssc#S40082945 | black         | 927.9251 | 85.9188 | 0.970366 | 0.006097 | 7.034    |
| gnl UG Ssc#S40084406 | turquoise     | 823.9894 | 258.533 | 0.957528 | 0.01044  | 8.506    |
| gnl UG Ssc#S40084794 | orange        | 248.4084 | 29.012  | 0.948873 | 0.013771 | 4.096    |



|                      |              |          |         |          |          |         |
|----------------------|--------------|----------|---------|----------|----------|---------|
| gnl UG Ssc#S40087294 | green        | 112.5104 | 44.8805 | 0.899306 | 0.037772 | 2.448   |
| gnl UG Ssc#S40091442 | brown        | 117.2646 | 10.1212 | 0.510191 | 0.379803 | 2.218   |
| gnl UG Ssc#S40094285 | turquoise    | 519.4333 | 175.364 | 0.828255 | 0.083204 | 8.262   |
| gnl UG Ssc#S40094995 | blue         | 799.9184 | 233.274 | 0.972041 | 0.005588 | 5.378   |
| gnl UG Ssc#S40095300 | magenta      | 228.7786 | 73.6686 | 0.97607  | 0.004428 | 5.154   |
| gnl UG Ssc#S40095611 | lightyellow  | 972.176  | 63.5058 | 0.999878 | 1.62E-06 | 6.906   |
| gnl UG Ssc#S40096291 | yellow       | 270.7602 | 99.9817 | 0.957922 | 0.010296 | 9.93    |
| gnl UG Ssc#S40096829 | greenyellow  | 167.647  | 42.2884 | 0.934157 | 0.02008  | 19.734  |
| gnl UG Ssc#S40097075 | brown        | 197.1947 | 58.1295 | 0.817045 | 0.091319 | 3.264   |
| gnl UG Ssc#S40097726 | lightcyan    | 185.4682 | 13.3017 | 0.565952 | 0.319976 | 2.116   |
| gnl UG Ssc#S40098777 | brown        | 257.9111 | 22.8381 | 0.611188 | 0.273421 | 13.236  |
| gnl UG Ssc#S40099921 | darkgrey     | 199.2988 | 31.9803 | 0.976027 | 0.00444  | 3.102   |
| gnl UG Ssc#S40100350 | brown        | 106.2904 | 37.7609 | 0.860953 | 0.060926 | 1.83    |
| gnl UG Ssc#S40100454 | pink         | 270.5845 | 73.3617 | 0.983931 | 0.002439 | 52.578  |
| gnl UG Ssc#S40101480 | brown        | 200.357  | 57.0705 | 0.864294 | 0.058775 | 2.014   |
| gnl UG Ssc#S40103354 | brown        | 125.4299 | 43.8102 | 0.887989 | 0.044237 | 50.35   |
| gnl UG Ssc#S40104089 | red          | 532.4573 | 96.4782 | 0.968776 | 0.006592 | 33.782  |
| gnl UG Ssc#S40106980 | magenta      | 270.7098 | 79.867  | 0.99343  | 0.000639 | 2.862   |
| gnl UG Ssc#S40107769 | greenyellow  | 194.255  | 48.7709 | 0.970779 | 0.00597  | 47.048  |
| gnl UG Ssc#S40108865 | purple       | 158.0998 | 20.0019 | 0.859791 | 0.061681 | 72.02   |
| gnl UG Ssc#S40109312 | brown        | 203.2752 | 61.2514 | 0.886311 | 0.045223 | 1.37    |
| gnl UG Ssc#S40110548 | pink         | 280.5678 | 70.651  | 0.971009 | 0.0059   | 7.464   |
| gnl UG Ssc#S40110625 | blue         | 800.6276 | 225.01  | 0.95884  | 0.009962 | 34.162  |
| gnl UG Ssc#S40110683 | pink         | 277.8142 | 53.8033 | 0.889225 | 0.043516 | 12.094  |
| gnl UG Ssc#S40110774 | lightcyan    | 168.5738 | 24.2165 | 0.843423 | 0.072603 | 8.188   |
| gnl UG Ssc#S40111130 | magenta      | 248.66   | 79.4091 | 0.991237 | 0.000983 | 4.032   |
| gnl UG Ssc#S40117649 | pink         | 286.5827 | 68.3241 | 0.95438  | 0.011617 | 12.958  |
| gnl UG Ssc#S40118942 | green        | 100.2479 | 41.1071 | 0.878249 | 0.050055 | 18.554  |
| gnl UG Ssc#S40121987 | green        | 158.3367 | 19.2833 | 0.054486 | 0.930661 | 0.682   |
| gnl UG Ssc#S40127774 | darkgrey     | 185.2413 | 33.3608 | 0.985571 | 0.002076 | 24.794  |
| gnl UG Ssc#S40130919 | turquoise    | 301.7529 | 99.6647 | 0.67864  | 0.207822 | 36.45   |
| gnl UG Ssc#S40131166 | purple       | 83.08105 | 14.6468 | 0.717345 | 0.17254  | 2.42    |
| gnl UG Ssc#S40140172 | magenta      | 268.9804 | 78.1733 | 0.987766 | 0.001621 | 9.29    |
| gnl UG Ssc#S40141829 | navy         | 112.0456 | 34.7298 | 0.866079 | 0.057635 | 241.138 |
| gnl UG Ssc#S40142099 | green        | 128.7579 | 36.7676 | 0.825452 | 0.085211 | 5.906   |
| gnl UG Ssc#S40143536 | green        | 109.8195 | 41.2052 | 0.856154 | 0.064059 | 73.064  |
| gnl UG Ssc#S40143544 | magenta      | 207.4227 | 66.6749 | 0.952309 | 0.012413 | 35.978  |
| gnl UG Ssc#S40144447 | brown        | 188.1969 | 57.4242 | 0.863083 | 0.059552 | 18.418  |
| gnl UG Ssc#S40144457 | red          | 525.0579 | 106.059 | 0.990126 | 0.001176 | 30.402  |
| gnl UG Ssc#S40144865 | tan          | 623.8899 | 48.1587 | 0.922757 | 0.02547  | 4.008   |
| gnl UG Ssc#S40145713 | green        | 139.8448 | 50.6424 | 0.937047 | 0.018781 | 7.96    |
| gnl UG Ssc#S40146561 | midnightblue | 158.3892 | 33.1631 | 0.909621 | 0.032171 | 144.026 |
| gnl UG Ssc#S40146833 | greenyellow  | 156.2929 | 37.0362 | 0.899209 | 0.037826 | 62.798  |
| gnl UG Ssc#S40149693 | brown        | 211.5995 | 60.7289 | 0.858163 | 0.062742 | 65.264  |
| gnl UG Ssc#S40151409 | blue         | 760.4224 | 188.625 | 0.921143 | 0.026265 | 40.568  |
| gnl UG Ssc#S40152348 | yellow       | 216.9272 | 63.9747 | 0.845162 | 0.071417 | 55.592  |
| gnl UG Ssc#S40152399 | white        | 224.1118 | 22.4238 | 0.950125 | 0.01327  | 3.102   |
| gnl UG Ssc#S40153033 | brown        | 205.3722 | 60.7776 | 0.853888 | 0.065556 | 12.43   |

|                      |               |          |         |          |          |         |
|----------------------|---------------|----------|---------|----------|----------|---------|
| gnl UG Ssc#S40153466 | turquoise     | 591.1654 | 177.091 | 0.872381 | 0.053668 | 154.336 |
| gnl UG Ssc#S40153514 | royalblue     | 335.1091 | 31.356  | 0.983173 | 0.002614 | 53.298  |
| gnl UG Ssc#S40154325 | black         | 859.6987 | 87.8562 | 0.974796 | 0.004785 | 3.174   |
| gnl UG Ssc#S40154377 | brown         | 179.7373 | 52.4401 | 0.814305 | 0.093337 | 1.554   |
| gnl UG Ssc#S40154544 | purple        | 194.2947 | 17.9019 | 0.808196 | 0.097884 | 87.51   |
| gnl UG Ssc#S40155098 | tan           | 865.2886 | 66.4521 | 0.99126  | 0.00098  | 3.198   |
| gnl UG Ssc#S40155274 | green         | 96.49012 | 33.8054 | 0.773338 | 0.125042 | 16.344  |
| gnl UG Ssc#S40157076 | purple        | 119.38   | 18.6648 | 0.726047 | 0.164871 | 19.152  |
| gnl UG Ssc#S40157206 | red           | 663.2862 | 102.703 | 0.982978 | 0.002659 | 9.24    |
| gnl UG Ssc#S40158599 | green         | 91.93634 | 41.0055 | 0.879732 | 0.049155 | 5.54    |
| gnl UG Ssc#S40159132 | turquoise     | 588.6338 | 182.675 | 0.85322  | 0.065999 | 81.572  |
| gnl UG Ssc#S40160168 | blue          | 458.8969 | 123.832 | 0.829811 | 0.082096 | 8.136   |
| gnl UG Ssc#S40162079 | darkred       | 141.9292 | 27.3527 | 0.867906 | 0.056475 | 3.764   |
| gnl UG Ssc#S40162503 | blue          | 816.1148 | 238.911 | 0.974081 | 0.00499  | 67.316  |
| gnl UG Ssc#S40163341 | violet        | 930.4593 | 74.1585 | 0.996361 | 0.000263 | 4.25    |
| gnl UG Ssc#S40163661 | turquoise     | 371.8022 | 125.055 | 0.749345 | 0.144846 | 73.71   |
| gnl UG Ssc#S40166203 | turquoise     | 769.7008 | 248.823 | 0.938147 | 0.018294 | 5.438   |
| gnl UG Ssc#S40166987 | yellow        | 135.1118 | 36.6802 | 0.720041 | 0.170153 | 2.408   |
| gnl UG Ssc#S40169746 | turquoise     | 640.3582 | 179.545 | 0.878603 | 0.04984  | 17.904  |
| gnl UG Ssc#S40170485 | turquoise     | 735.538  | 225.412 | 0.928899 | 0.022515 | 19.266  |
| gnl UG Ssc#S40171578 | magenta       | 199.6185 | 59.3054 | 0.931716 | 0.021199 | 2.352   |
| gnl UG Ssc#S40171618 | black         | 964.5842 | 99.0636 | 0.999    | 3.80E-05 | 20.564  |
| gnl UG Ssc#S40171668 | navy          | 140.0448 | 30.1286 | 0.896052 | 0.039597 | 45.858  |
| gnl UG Ssc#S40172065 | darkgreen     | 266.0058 | 23.4141 | 0.865222 | 0.058181 | 5.92    |
| gnl UG Ssc#S40173479 | yellow        | 263.3688 | 94.6904 | 0.94195  | 0.016643 | 2.026   |
| gnl UG Ssc#S40173770 | turquoise     | 688.4225 | 227.134 | 0.90576  | 0.034233 | 24.44   |
| gnl UG Ssc#S40174139 | purple        | 200.4217 | 18.1624 | 0.795925 | 0.107215 | 43.068  |
| gnl UG Ssc#S40174218 | turquoise     | 602.2084 | 190.221 | 0.88276  | 0.047332 | 7.426   |
| gnl UG Ssc#S40174963 | darkgreen     | 222.2241 | 26.68   | 0.92736  | 0.023244 | 622.918 |
| gnl UG Ssc#S40175532 | orange        | 238.3814 | 27.2081 | 0.940764 | 0.017152 | 16.836  |
| gnl UG Ssc#S40177122 | brown         | 194.9086 | 42.5339 | 0.685274 | 0.201644 | 15.626  |
| gnl UG Ssc#S40180694 | pink          | 270.2665 | 69.4914 | 0.962863 | 0.008543 | 22.488  |
| gnl UG Ssc#S40181886 | turquoise     | 592.7153 | 164.691 | 0.857445 | 0.063211 | 1.606   |
| gnl UG Ssc#S40182904 | blue          | 790.7    | 173.649 | 0.903211 | 0.035618 | 7.132   |
| gnl UG Ssc#S40184013 | paleturquoise | 150.1143 | 16.9133 | 0.92203  | 0.025827 | 9.054   |
| gnl UG Ssc#S40185643 | yellow        | 299.5022 | 105.946 | 0.967485 | 0.007004 | 2.004   |
| gnl UG Ssc#S40186233 | brown         | 217.4293 | 60.1306 | 0.859306 | 0.061996 | 51.346  |
| gnl UG Ssc#S40188565 | turquoise     | 323.6825 | 86.3196 | 0.636577 | 0.24816  | 12.52   |
| gnl UG Ssc#S40191217 | yellow        | 278.5167 | 100.115 | 0.958408 | 0.010119 | 1.604   |
| gnl UG Ssc#S40191742 | blue          | 828.3551 | 226.676 | 0.961737 | 0.008933 | 11.766  |
| gnl UG Ssc#S40195327 | turquoise     | 464.4216 | 153.651 | 0.826026 | 0.084798 | 67.122  |
| gnl UG Ssc#S40197378 | black         | 946.4837 | 97.7375 | 0.996601 | 0.000238 | 21.53   |
| gnl UG Ssc#S40198313 | lightgreen    | 259.8448 | 55.7631 | 0.980154 | 0.003346 | 7.742   |
| gnl UG Ssc#S40198369 | brown         | 215.7478 | 62.0306 | 0.92094  | 0.026367 | 4.668   |
| gnl UG Ssc#S40204438 | magenta       | 211.2527 | 68.0166 | 0.956553 | 0.0108   | 11.046  |
| gnl UG Ssc#S40204678 | orange        | 361.0995 | 30.8365 | 0.967156 | 0.00711  | 31.968  |
| gnl UG Ssc#S40204729 | lightcyan     | 213.263  | 32.3291 | 0.926835 | 0.023494 | 14.19   |
| gnl UG Ssc#S40205297 | turquoise     | 941.4116 | 273.036 | 0.992026 | 0.000854 | 7.102   |

|                      |               |          |         |          |          |         |
|----------------------|---------------|----------|---------|----------|----------|---------|
| gnl UG Ssc#S40206941 | blue          | 893.0359 | 236.414 | 0.972978 | 0.005311 | 55.272  |
| gnl UG Ssc#S40206946 | brown         | 118.0597 | 22.1629 | 0.505749 | 0.384675 | 3.582   |
| gnl UG Ssc#S40208375 | darkturquoise | 169.7335 | 23.439  | 0.901277 | 0.03668  | 1.666   |
| gnl UG Ssc#S40209535 | turquoise     | 622.6289 | 204.685 | 0.900005 | 0.037383 | 8.038   |
| gnl UG Ssc#S40210299 | greenyellow   | 195.2685 | 53.2917 | 0.99017  | 0.001168 | 76.982  |
| gnl UG Ssc#S40210420 | turquoise     | 888.1734 | 259.024 | 0.968005 | 0.006837 | 23.158  |
| gnl UG Ssc#S40212608 | darkgreen     | 246.2063 | 36.9693 | 0.974288 | 0.00493  | 19.2    |
| gnl UG Ssc#S40212638 | turquoise     | 668.8484 | 168.779 | 0.858397 | 0.062589 | 64.672  |
| gnl UG Ssc#S40213312 | green         | 104.5995 | 54.6705 | 0.948407 | 0.013958 | 307.108 |
| gnl UG Ssc#S40213383 | green         | 81.02609 | 44.8224 | 0.868249 | 0.056259 | 12.524  |
| gnl UG Ssc#S40214496 | turquoise     | 696.0273 | 222.377 | 0.898345 | 0.038308 | 5.356   |
| gnl UG Ssc#S40214545 | greenyellow   | 238.8029 | 43.3283 | 0.930685 | 0.021677 | 17.204  |
| gnl UG Ssc#S40214866 | brown         | 100.8996 | 42.2315 | 0.826457 | 0.08449  | 44.874  |
| gnl UG Ssc#S40215563 | yellow        | 259.7954 | 86.2178 | 0.927801 | 0.023034 | 6.204   |
| gnl UG Ssc#S40215755 | pink          | 82.94664 | 8.1718  | 0.183795 | 0.76731  | 8.086   |
| gnl UG Ssc#S40219335 | midnightblue  | 187.5952 | 42.171  | 0.9729   | 0.005333 | 16.936  |
| gnl UG Ssc#S40219489 | navy          | 118.7763 | 20.5017 | 0.782845 | 0.117439 | 20.772  |
| gnl UG Ssc#S40219525 | purple        | 168.5344 | 17.7735 | 0.808767 | 0.097456 | 28.596  |
| gnl UG Ssc#S40219983 | royalblue     | 279.5716 | 29.2174 | 0.948971 | 0.013731 | 125.506 |
| gnl UG Ssc#S40232606 | darkgrey      | 179.1101 | 32.868  | 0.97971  | 0.003459 | 7.552   |
| gnl UG Ssc#S40233232 | magenta       | 276.1006 | 77.4887 | 0.986394 | 0.001901 | 10.106  |
| gnl UG Ssc#S40235024 | turquoise     | 562.1134 | 170.272 | 0.842422 | 0.073289 | 4.834   |
| gnl UG Ssc#S40238117 | lightgreen    | 291.984  | 54.6033 | 0.975864 | 0.004485 | 41.624  |
| gnl UG Ssc#S40238461 | midnightblue  | 175.1384 | 39.4181 | 0.945438 | 0.015173 | 7.27    |
| gnl UG Ssc#S40239079 | greenyellow   | 179.2253 | 36.6099 | 0.890045 | 0.043039 | 20.428  |
| gnl UG Ssc#S40241735 | magenta       | 224.5623 | 70.8565 | 0.968598 | 0.006648 | 0.692   |
| gnl UG Ssc#S40243562 | darkturquoise | 118.52   | 1.80283 | 0.339752 | 0.575887 | 16.818  |
| gnl UG Ssc#S40262955 | lightyellow   | 948.5302 | 63.2689 | 0.999142 | 3.02E-05 | 2.512   |
| gnl UG Ssc#S40267793 | orange        | 261.5809 | 30.6348 | 0.965324 | 0.007711 | 91.89   |
| gnl UG Ssc#S40268415 | turquoise     | 627.4799 | 154.653 | 0.828813 | 0.082806 | 15.408  |
| gnl UG Ssc#S40268599 | greenyellow   | 161.4109 | 46.5866 | 0.960168 | 0.009486 | 8.666   |
| gnl UG Ssc#S40268747 | magenta       | 260.6386 | 80.724  | 0.995012 | 0.000423 | 16.542  |
| gnl UG Ssc#S40270259 | blue          | 640.6957 | 174.499 | 0.905308 | 0.034478 | 5.154   |
| gnl UG Ssc#S40271107 | red           | 626.6984 | 106.154 | 0.989897 | 0.001217 | 33.57   |
| gnl UG Ssc#S40272618 | royalblue     | 158.9417 | 15.5462 | 0.741384 | 0.151603 | 132.258 |
| gnl UG Ssc#S40277991 | green         | 93.34728 | 37.0501 | 0.852102 | 0.066742 | 7.978   |
| gnl UG Ssc#S40278304 | red           | 695.6668 | 85.0005 | 0.939973 | 0.017495 | 5.178   |
| gnl UG Ssc#S40283901 | royalblue     | 377.5923 | 33.3347 | 0.999607 | 9.37E-06 | 429.566 |
| gnl UG Ssc#S40288024 | green         | 107.8088 | 46.0335 | 0.905241 | 0.034514 | 13.848  |
| gnl UG Ssc#S40288802 | turquoise     | 800.5467 | 233.976 | 0.936775 | 0.018902 | 50.81   |
| gnl UG Ssc#S40289417 | navy          | 131.188  | 41.2517 | 0.940162 | 0.017412 | 4.13    |
| gnl UG Ssc#S40306095 | turquoise     | 626.7642 | 200.204 | 0.86611  | 0.057615 | 13.262  |
| gnl UG Ssc#S40312019 | brown         | 230.7449 | 59.207  | 0.881999 | 0.047788 | 2.678   |
| gnl UG Ssc#S40314380 | darkorange    | 65.27995 | 1.17516 | 0.284882 | 0.642245 | 0.678   |
| gnl UG Ssc#S40315766 | lightcyan     | 252.7633 | 37.8596 | 0.951922 | 0.012563 | 16.416  |
| gnl UG Ssc#S40318462 | black         | 998.8956 | 96.6889 | 0.993721 | 0.000597 | 165.918 |
| gnl UG Ssc#S40320170 | turquoise     | 443.8447 | 145.284 | 0.796463 | 0.106801 | 1.102   |
| gnl UG Ssc#S40322346 | turquoise     | 282.832  | 93.1234 | 0.662889 | 0.222695 | 62.142  |

|                      |               |          |         |          |          |         |
|----------------------|---------------|----------|---------|----------|----------|---------|
| gnl UG Ssc#S40324300 | grey60        | 975.8525 | 60.5758 | 0.989133 | 0.001358 | 17.394  |
| gnl UG Ssc#S40324547 | lightgreen    | 286.0987 | 60.4912 | 0.996675 | 0.00023  | 6.182   |
| gnl UG Ssc#S40324708 | grey          | 116.1548 | 4.30598 | 0.282085 | 0.645659 | 15.736  |
| gnl UG Ssc#S40326987 | red           | 451.0511 | 105.806 | 0.989923 | 0.001213 | 91.6    |
| gnl UG Ssc#S40327511 | greenyellow   | 157.019  | 44.5    | 0.947724 | 0.014235 | 27.222  |
| gnl UG Ssc#S40330478 | skyblue       | 393.5242 | 25.5665 | 0.943137 | 0.016138 | 20.15   |
| gnl UG Ssc#S40333225 | brown         | 118.2411 | 34.0688 | 0.651736 | 0.233397 | 19.948  |
| gnl UG Ssc#S40334954 | blue          | 820.6163 | 204.385 | 0.937125 | 0.018746 | 12.014  |
| gnl UG Ssc#S40335524 | pink          | 259.1497 | 72.0783 | 0.980598 | 0.003235 | 15.364  |
| gnl UG Ssc#S40342578 | darkorange    | 163.8582 | 22.5683 | 0.988235 | 0.001529 | 16.61   |
| gnl UG Ssc#S40349544 | black         | 810.9816 | 77.3323 | 0.94925  | 0.013619 | 3.658   |
| gnl UG Ssc#S40352145 | blue          | 883.4161 | 222.696 | 0.957221 | 0.010553 | 2.284   |
| gnl UG Ssc#S40362920 | lightgreen    | 277.3457 | 58.9546 | 0.991417 | 0.000953 | 1.444   |
| gnl UG Ssc#S40367565 | blue          | 651.0492 | 158.5   | 0.884512 | 0.046288 | 4.466   |
| gnl UG Ssc#S40369764 | yellow        | 283.2897 | 107.287 | 0.974505 | 0.004868 | 0.828   |
| gnl UG Ssc#S40370377 | navy          | 77.37925 | 19.1763 | 0.702439 | 0.185906 | 42.442  |
| gnl UG Ssc#S40376111 | darkred       | 211.4186 | 12.5603 | 0.683263 | 0.203511 | 15.208  |
| gnl UG Ssc#S40376675 | grey60        | 979.2456 | 59.7988 | 0.9865   | 0.001879 | 14.098  |
| gnl UG Ssc#S40377012 | midnightblue  | 98.03554 | 34.3667 | 0.92498  | 0.024387 | 307.274 |
| gnl UG Ssc#S40377740 | yellow        | 278.088  | 94.8316 | 0.945199 | 0.015273 | 844.392 |
| gnl UG Ssc#S40378245 | green         | 102.1776 | 52.2118 | 0.933505 | 0.020377 | 9.068   |
| gnl UG Ssc#S40380547 | greenyellow   | 217.5491 | 49.0416 | 0.969608 | 0.006331 | 7.02    |
| gnl UG Ssc#S40381468 | yellow        | 213.9546 | 62.6467 | 0.854111 | 0.065407 | 4.424   |
| gnl UG Ssc#S40390344 | brown         | 197.3234 | 59.0612 | 0.845935 | 0.070891 | 2.8     |
| gnl UG Ssc#S40396824 | navy          | 148.1383 | 31.4297 | 0.898934 | 0.037979 | 134.674 |
| gnl UG Ssc#S40401313 | red           | 509.0115 | 109.994 | 0.998444 | 7.37E-05 | 247.67  |
| gnl UG Ssc#S40406997 | white         | 890.1054 | 26.5773 | 0.810899 | 0.095864 | 5.194   |
| gnl UG Ssc#S40411000 | purple        | 78.99574 | 17.3203 | 0.997211 | 0.000177 | 14.892  |
| gnl UG Ssc#S40414470 | brown         | 100.9307 | 26.7405 | 0.456868 | 0.439221 | 48.75   |
| gnl UG Ssc#S40416576 | pink          | 155.97   | 32.7457 | 0.829669 | 0.082196 | 12.204  |
| gnl UG Ssc#S40417362 | blue          | 798.5301 | 204.369 | 0.936826 | 0.018879 | 14.916  |
| gnl UG Ssc#S40424734 | lightcyan     | 180.6637 | 12.2814 | 0.47939  | 0.413882 | 15.056  |
| gnl UG Ssc#S40426329 | lightcyan     | 233.3995 | 36.6214 | 0.947134 | 0.014475 | 21.346  |
| gnl UG Ssc#S40427363 | magenta       | 270.139  | 79.2908 | 0.991956 | 0.000865 | 6.026   |
| gnl UG Ssc#S40430134 | navy          | 144.0539 | 11.5085 | -0.35149 | 0.561861 | 1.114   |
| gnl UG Ssc#S40431495 | salmon        | 163.1042 | 44.8756 | 0.960699 | 0.009297 | 20.268  |
| gnl UG Ssc#S40431582 | blue          | 782.0429 | 223.512 | 0.960133 | 0.009498 | 44.472  |
| gnl UG Ssc#S40432472 | lightgreen    | 302.827  | 59.5144 | 0.993318 | 0.000655 | 8.032   |
| gnl UG Ssc#S40434088 | turquoise     | 681.5193 | 224.651 | 0.896668 | 0.03925  | 98.676  |
| gnl UG Ssc#S40435203 | skyblue       | 330.4071 | 25.3812 | 0.939403 | 0.017743 | 7.336   |
| gnl UG Ssc#S40435713 | darkorange    | 179.2904 | 20.3575 | 0.987197 | 0.001736 | 22.244  |
| gnl UG Ssc#S40437142 | brown         | 197.1755 | 60.2452 | 0.860244 | 0.061386 | 3.16    |
| gnl UG Ssc#S40437415 | grey          | 156.5681 | 14.6206 | -0.89886 | 0.03802  | 12.82   |
| gnl UG Ssc#S40439319 | darkred       | 243.988  | 42.1263 | 0.977713 | 0.003981 | 4.256   |
| gnl UG Ssc#S40439733 | lightgreen    | 290.6379 | 54.8133 | 0.976533 | 0.0043   | 14.82   |
| gnl UG Ssc#S40439791 | darkturquoise | 181.2867 | 32.3951 | 0.977381 | 0.00407  | 8.66    |
| gnl UG Ssc#S40440480 | greenyellow   | 117.6178 | 23.8698 | 0.784806 | 0.115888 | 273.272 |
| gnl UG Ssc#S40442316 | midnightblue  | 215.629  | 37.0064 | 0.94088  | 0.017102 | 18.478  |

|                      |               |          |         |          |          |         |
|----------------------|---------------|----------|---------|----------|----------|---------|
| gnl UG Ssc#S40442878 | darkgrey      | 164.6781 | 27.9205 | 0.949783 | 0.013406 | 19.272  |
| gnl UG Ssc#S40443028 | lightgreen    | 302.4509 | 55.912  | 0.980698 | 0.00321  | 0.866   |
| gnl UG Ssc#S40443068 | darkgreen     | 246.6968 | 20.2558 | 0.810943 | 0.095831 | 15.706  |
| gnl UG Ssc#S40443438 | purple        | 87.09522 | 3.72639 | -0.71464 | 0.174944 | 26.34   |
| gnl UG Ssc#S40443581 | navy          | 111.0619 | 36.9021 | 0.890815 | 0.042593 | 5.072   |
| gnl UG Ssc#S40448602 | pink          | 292.1082 | 63.8361 | 0.930466 | 0.02178  | 9.552   |
| gnl UG Ssc#S40453605 | pink          | 276.3523 | 71.7519 | 0.975078 | 0.004705 | 5.554   |
| gnl UG Ssc#S40459875 | yellow        | 288.3743 | 110.276 | 0.979654 | 0.003473 | 19.806  |
| gnl UG Ssc#S40463925 | darkturquoise | 195.5587 | 29.7552 | 0.956725 | 0.010736 | 4.296   |
| gnl UG Ssc#S40471332 | greenyellow   | 209.6358 | 48.8017 | 0.966247 | 0.007406 | 43.356  |
| gnl UG Ssc#S40472465 | darkgrey      | 147.4954 | 26.7459 | 0.933288 | 0.020476 | 11.88   |
| gnl UG Ssc#S40473833 | pink          | 227.2504 | 68.4177 | 0.984385 | 0.002337 | 6.234   |
| gnl UG Ssc#S40473912 | lightcyan     | 276.4176 | 38.8659 | 0.960552 | 0.009349 | 1.082   |
| gnl UG Ssc#S40474141 | turquoise     | 809.5604 | 246.044 | 0.947389 | 0.014371 | 14.276  |
| gnl UG Ssc#S40474257 | darkturquoise | 163.1063 | 24.7801 | 0.900159 | 0.037298 | 7.384   |
| gnl UG Ssc#S40475010 | darkmagenta   | 959.25   | 26.8513 | 0.992944 | 0.000711 | 13.432  |
| gnl UG Ssc#S40475244 | violet        | 982.817  | 73.3687 | 0.994216 | 0.000528 | 3.624   |
| gnl UG Ssc#S40476333 | turquoise     | 789.6602 | 253.553 | 0.950874 | 0.012974 | 36.336  |
| gnl UG Ssc#S40477805 | grey60        | 910.0558 | 61.3838 | 0.992061 | 0.000848 | 6.964   |
| gnl UG Ssc#S40478006 | blue          | 675.8771 | 130.954 | 0.842283 | 0.073384 | 2.336   |
| gnl UG Ssc#S40478259 | magenta       | 267.9464 | 81.6099 | 0.998022 | 0.000106 | 59.074  |
| gnl UG Ssc#S40479242 | tan           | 889.7059 | 67.2329 | 0.993774 | 0.000589 | 18.622  |
| gnl UG Ssc#S40479246 | purple        | 155.6831 | 20.714  | 0.865832 | 0.057792 | 11.822  |
| gnl UG Ssc#S40480053 | brown         | 113.9794 | 43.8888 | 0.815526 | 0.092435 | 11.578  |
| gnl UG Ssc#S40480472 | yellow        | 238.1562 | 78.5755 | 0.89959  | 0.037614 | 3.686   |
| gnl UG Ssc#S40481511 | white         | 185.1066 | 24.0677 | 0.865069 | 0.058279 | 46.666  |
| gnl UG Ssc#S40482232 | turquoise     | 934.5364 | 265.051 | 0.986947 | 0.001787 | 30.684  |
| gnl UG Ssc#S40482424 | salmon        | 228.896  | 48.0189 | 0.974805 | 0.004783 | 29.528  |
| gnl UG Ssc#S40482896 | turquoise     | 383.1343 | 122.572 | 0.723642 | 0.16698  | 10.84   |
| gnl UG Ssc#S40483985 | turquoise     | 840.8179 | 242     | 0.949864 | 0.013374 | 26.182  |
| gnl UG Ssc#S40485583 | grey60        | 858.3761 | 58.6124 | 0.982668 | 0.002732 | 4.73    |
| gnl UG Ssc#S40485684 | blue          | 703.4718 | 172.33  | 0.90114  | 0.036755 | 4.626   |
| gnl UG Ssc#S40488267 | turquoise     | 330.8549 | 68.7611 | 0.61729  | 0.26729  | 11.618  |
| gnl UG Ssc#S40492797 | lightgreen    | 283.8522 | 60.4054 | 0.99641  | 0.000258 | 0.102   |
| gnl UG Ssc#S40492996 | royalblue     | 178.7588 | 7.0416  | 0.37329  | 0.535994 | 0.72    |
| gnl UG Ssc#S40494040 | magenta       | 267.625  | 78.8677 | 0.989759 | 0.001242 | 6.788   |
| gnl UG Ssc#S40494112 | violet        | 999.0852 | 68.9031 | 0.981398 | 0.003037 | 10.068  |
| gnl UG Ssc#S40494421 | pink          | 78.22013 | 19.4597 | 0.42338  | 0.477503 | 33.228  |
| gnl UG Ssc#S40494534 | salmon        | 140.4631 | 31.9177 | 0.873934 | 0.052704 | 22.996  |
| gnl UG Ssc#S40494554 | yellowgreen   | 162.0235 | 16.2501 | 0.966974 | 0.007169 | 12.612  |
| gnl UG Ssc#S40494954 | white         | 963.4919 | 29.452  | 0.790415 | 0.111487 | 10.214  |
| gnl UG Ssc#S40495537 | turquoise     | 765.494  | 243.183 | 0.941761 | 0.016724 | 318.036 |
| gnl UG Ssc#S40495944 | turquoise     | 848.5993 | 259.123 | 0.960108 | 0.009507 | 48.206  |
| gnl UG Ssc#S40496270 | blue          | 835.7577 | 198.574 | 0.9333   | 0.02047  | 55.168  |
| gnl UG Ssc#S40496326 | blue          | 784.6384 | 234.977 | 0.971048 | 0.005888 | 21.332  |
| gnl UG Ssc#S40496509 | brown         | 94.46862 | 35.6499 | 0.786728 | 0.114375 | 6.736   |
| gnl UG Ssc#S40499484 | grey60        | 909.6132 | 59.998  | 0.987337 | 0.001707 | 5.522   |
| gnl UG Ssc#S40499633 | pink          | 280.7116 | 73.7062 | 0.981291 | 0.003063 | 6.422   |

|                      |               |          |         |          |          |         |
|----------------------|---------------|----------|---------|----------|----------|---------|
| gnl UG Ssc#S40500401 | salmon        | 149.7757 | 46.7044 | 0.970384 | 0.006091 | 67.714  |
| gnl UG Ssc#S40500672 | sienna3       | 997.4918 | 25.3733 | 0.994134 | 0.000539 | 82.726  |
| gnl UG Ssc#S40500952 | midnightblue  | 99.70485 | 21.105  | 0.80501  | 0.100282 | 538.486 |
| gnl UG Ssc#S40508283 | darkorange    | 173.6042 | 21.5093 | 0.978661 | 0.00373  | 3.712   |
| gnl UG Ssc#S40511352 | skyblue       | 131.6092 | 19.521  | 0.887641 | 0.044441 | 1.17    |
| gnl UG Ssc#S40512743 | darkred       | 245.9058 | 42.7094 | 0.982481 | 0.002776 | 3.338   |
| gnl UG Ssc#S40513578 | turquoise     | 344.0956 | 99.1976 | 0.65858  | 0.226813 | 11.724  |
| gnl UG Ssc#S40516238 | turquoise     | 505.7162 | 129.543 | 0.75485  | 0.140226 | 7.988   |
| gnl UG Ssc#S40516636 | brown         | 84.75371 | 28.7515 | 0.753183 | 0.14162  | 7.868   |
| gnl UG Ssc#S40524913 | turquoise     | 888.045  | 256.253 | 0.970645 | 0.006011 | 331.772 |
| gnl UG Ssc#S40526036 | skyblue       | 108.26   | 18.4791 | 0.871648 | 0.054124 | 63.5    |
| gnl UG Ssc#S40526482 | royalblue     | 387.2958 | 33.0867 | 0.996618 | 0.000236 | 9.24    |
| gnl UG Ssc#S40527077 | lightcyan     | 180.0996 | 12.5622 | 0.474771 | 0.41905  | 9.666   |
| gnl UG Ssc#S40527391 | yellow        | 168.6051 | 44.9915 | 0.757494 | 0.138023 | 25.32   |
| gnl UG Ssc#S40527867 | greenyellow   | 194.6036 | 55.4558 | 0.998363 | 7.95E-05 | 79.33   |
| gnl UG Ssc#S40528822 | grey60        | 880.4136 | 60.2789 | 0.988288 | 0.001519 | 22.626  |
| gnl UG Ssc#S40529248 | grey          | 163.8939 | 14.8601 | -0.96722 | 0.00709  | 346.352 |
| gnl UG Ssc#S40529850 | darkgreen     | 236.2217 | 33.8636 | 0.969362 | 0.006408 | 7.09    |
| gnl UG Ssc#S40543101 | brown         | 133.0059 | 37.7229 | 0.737856 | 0.154626 | 11.69   |
| gnl UG Ssc#S40543607 | midnightblue  | 153.0927 | 37.5    | 0.952552 | 0.012318 | 11.642  |
| gnl UG Ssc#S40544230 | salmon        | 225.4117 | 46.7079 | 0.9698   | 0.006272 | 4.79    |
| gnl UG Ssc#S40546869 | turquoise     | 686.5411 | 225.588 | 0.898996 | 0.037945 | 46.26   |
| gnl UG Ssc#S40546945 | lightgreen    | 274.662  | 58.321  | 0.98925  | 0.001336 | 2.776   |
| gnl UG Ssc#S40550337 | tan           | 794.1723 | 60.938  | 0.972599 | 0.005422 | 48.5    |
| gnl UG Ssc#S40551167 | darkgreen     | 217.1391 | 16.5488 | 0.737434 | 0.154989 | 2.896   |
| gnl UG Ssc#S40553929 | black         | 986.1048 | 95.6794 | 0.991305 | 0.000972 | 31.28   |
| gnl UG Ssc#S40554875 | royalblue     | 296.3661 | 31.1881 | 0.97226  | 0.005523 | 12.274  |
| gnl UG Ssc#S40556021 | turquoise     | 521.9258 | 148.116 | 0.817243 | 0.091173 | 18.694  |
| gnl UG Ssc#S40558865 | pink          | 264.5653 | 75.5496 | 0.998359 | 7.98E-05 | 0.468   |
| gnl UG Ssc#S40559812 | skyblue       | 183.3656 | 28.9058 | 0.973623 | 0.005122 | 54.09   |
| gnl UG Ssc#S40559942 | royalblue     | 248.5346 | 27.3357 | 0.932913 | 0.020648 | 8.342   |
| gnl UG Ssc#S40560136 | pink          | 156.1977 | 43.5332 | 0.885489 | 0.045709 | 21.278  |
| gnl UG Ssc#S40570043 | turquoise     | 862.8124 | 261.307 | 0.963849 | 0.008206 | 18.18   |
| gnl UG Ssc#S40572845 | turquoise     | 448.6003 | 150.152 | 0.83201  | 0.080538 | 7.952   |
| gnl UG Ssc#S40583885 | darkgrey      | 165.6368 | 29.088  | 0.951744 | 0.012633 | 12.818  |
| gnl UG Ssc#S40584531 | red           | 294.4154 | 68.5054 | 0.895663 | 0.039817 | 8.572   |
| gnl UG Ssc#S40584674 | turquoise     | 597.5306 | 172.122 | 0.859544 | 0.061841 | 7.172   |
| gnl UG Ssc#S40588301 | brown         | 179.3814 | 57.4359 | 0.917545 | 0.028068 | 382.472 |
| gnl UG Ssc#S41446009 | black         | 934.9686 | 97.2342 | 0.995241 | 0.000394 | 22.896  |
| gnl UG Ssc#S41446582 | black         | 893.8069 | 90.7775 | 0.981335 | 0.003053 | 12.638  |
| gnl UG Ssc#S41575095 | darkturquoise | 181.9185 | 22.8815 | 0.885835 | 0.045504 | 12.49   |
| gnl UG Ssc#S41575759 | lightgreen    | 292.5917 | 56.945  | 0.984286 | 0.002359 | 2.372   |
| gnl UG Ssc#S41576667 | navy          | 84.42769 | 5.80895 | 0.032843 | 0.95819  | 12.288  |
| gnl UG Ssc#S46917265 | brown         | 92.98824 | 40.1364 | 0.784985 | 0.115747 | 37.314  |
| gnl UG Ssc#S46917266 | greenyellow   | 162.8034 | 45.6094 | 0.951117 | 0.012878 | 105.272 |
| gnl UG Ssc#S5979288  | yellow        | 194.9574 | 63.0018 | 0.84031  | 0.074742 | 4.428   |
| gnl UG Ssc#S5983468  | blue          | 848.9256 | 198.477 | 0.930527 | 0.021751 | 13.808  |
| gnl UG Ssc#S5987022  | red           | 485.6038 | 98.9288 | 0.974597 | 0.004842 | 16.726  |

|                     |               |          |         |          |          |        |
|---------------------|---------------|----------|---------|----------|----------|--------|
| gnl UG Ssc#S5987782 | darkred       | 232.2522 | 44.5184 | 0.987882 | 0.001598 | 4.79   |
| gnl UG Ssc#S5989761 | lightgreen    | 287.2394 | 59.9807 | 0.994916 | 0.000435 | 2.836  |
| gnl UG Ssc#S5991837 | yellow        | 309.6478 | 116.295 | 0.991817 | 0.000887 | 4.466  |
| gnl UG Ssc#S5993568 | lightcyan     | 282.6863 | 41.7816 | 0.979076 | 0.003622 | 1.906  |
| gnl UG Ssc#S5994539 | royalblue     | 284.9657 | 30.7692 | 0.962006 | 0.008839 | 4.38   |
| gnl UG Ssc#S5995101 | turquoise     | 831.115  | 260.108 | 0.95973  | 0.009642 | 1.504  |
| gnl UG Ssc#S5995435 | grey          | 147.7297 | 6.82561 | 0.419036 | 0.48252  | 64.642 |
| gnl UG Ssc#S5999093 | white         | 194.143  | 25.0881 | 0.890564 | 0.042738 | 8.376  |
| gnl UG Ssc#S5999899 | magenta       | 257.8055 | 81.9705 | 0.999072 | 3.39E-05 | 16.552 |
| gnl UG Ssc#S6001821 | pink          | 286.3915 | 62.8591 | 0.929693 | 0.022141 | 10.222 |
| gnl UG Ssc#S6008489 | pink          | 150.7709 | 42.3119 | 0.868508 | 0.056095 | 23.3   |
| gnl UG Ssc#S6014656 | pink          | 103.9062 | 13.6625 | 0.068506 | 0.912844 | 81.562 |
| gnl UG Ssc#S6030301 | magenta       | 261.9439 | 82.2409 | 0.999509 | 1.31E-05 | 1.798  |
| gnl UG Ssc#S6033944 | paleturquoise | 192.195  | 18.62   | 0.933632 | 0.020319 | 2.364  |
| gnl UG Ssc#S6035331 | brown         | 106.0503 | 33.1746 | 0.585402 | 0.299727 | 2.242  |
| gnl UG Ssc#S6039711 | royalblue     | 292.1123 | 29.8471 | 0.950895 | 0.012966 | 5.286  |
| gnl UG Ssc#S6047303 | royalblue     | 271.6765 | 21.7674 | 0.863172 | 0.059494 | 25.256 |
| gnl UG Ssc#S6048843 | grey          | 127.8147 | 9.165   | -0.75882 | 0.136926 | 18.788 |
| gnl UG Ssc#S6049456 | green         | 94.22678 | 46.3979 | 0.908067 | 0.032996 | 32.924 |
| gnl UG Ssc#S6052869 | purple        | 193.7681 | 19.3342 | -0.73254 | 0.159214 | 2.4    |
| gnl UG Ssc#S6053340 | darkgrey      | 205.8544 | 33.5726 | 0.988513 | 0.001475 | 0.37   |
| gnl UG Ssc#S6054321 | darkturquoise | 130.0439 | 21.5727 | 0.863248 | 0.059445 | 1.96   |
| gnl UG Ssc#S6054758 | royalblue     | 333.5637 | 32.6185 | 0.9917   | 0.000907 | 0.616  |
| gnl UG Ssc#S6055006 | darkturquoise | 220.2392 | 32.0235 | 0.975415 | 0.00461  | 3.096  |
| gnl UG Ssc#S6055104 | green         | 89.57042 | 44.5201 | 0.862427 | 0.059974 | 12.546 |
| gnl UG Ssc#S6055465 | lightcyan     | 184.9499 | 13.6727 | 0.568745 | 0.317048 | 16.562 |
| gnl UG Ssc#S6056024 | pink          | 165.6918 | 3.47046 | -0.88564 | 0.045618 | 8.426  |
| gnl UG Ssc#S6057089 | darkmagenta   | 803.2996 | 22.9961 | 0.96142  | 0.009044 | 4.756  |
| gnl UG Ssc#S6057322 | navy          | 150.8495 | 9.45882 | -0.62218 | 0.262407 | 4.686  |
| gnl UG Ssc#S6057513 | darkgreen     | 287.5072 | 36.1865 | 0.982222 | 0.002838 | 63.168 |
| gnl UG Ssc#S6058884 | blue          | 892.9207 | 218.035 | 0.953348 | 0.012011 | 21.018 |
| gnl UG Ssc#S6058939 | darkorange    | 200.2094 | 20.2268 | 0.96949  | 0.006368 | 31.788 |
| gnl UG Ssc#S6059254 | blue          | 747.6902 | 155.652 | 0.882418 | 0.047537 | 8.194  |
| gnl UG Ssc#S6061125 | lightgreen    | 266.5542 | 56.207  | 0.981725 | 0.002957 | 1.84   |
| gnl UG Ssc#S6061185 | yellow        | 298.0077 | 112.935 | 0.985006 | 0.002199 | 3.378  |
| gnl UG Ssc#S6063101 | brown         | 187.1726 | 52.5259 | 0.754154 | 0.140808 | 7.858  |
| gnl UG Ssc#S6063403 | magenta       | 266.6018 | 80.5353 | 0.994658 | 0.000468 | 16.77  |
| gnl UG Ssc#S6063458 | royalblue     | 117.6035 | 7.47448 | 0.505599 | 0.38484  | 19.924 |
| gnl UG Ssc#S6063538 | darkred       | 214.8388 | 32.5699 | 0.925018 | 0.024368 | 1.454  |
| gnl UG Ssc#S6064814 | yellow        | 303.3962 | 116.148 | 0.991843 | 0.000883 | 6.5    |
| gnl UG Ssc#S6065016 | darkgrey      | 203.0995 | 31.6841 | 0.973859 | 0.005054 | 19.71  |
| gnl UG Ssc#S6065152 | yellow        | 286.012  | 102.91  | 0.961154 | 0.009137 | 2.536  |
| gnl UG Ssc#S6065267 | lightgreen    | 297.7557 | 61.2203 | 0.999121 | 3.13E-05 | 1.034  |
| gnl UG Ssc#S6072007 | orange        | 356.0463 | 34.9345 | 0.994348 | 0.00051  | 8.376  |
| gnl UG Ssc#S6072016 | brown         | 212.1886 | 56.8213 | 0.815357 | 0.09256  | 7.934  |
| gnl UG Ssc#S6072575 | violet        | 901.7717 | 72.3418 | 0.991363 | 0.000962 | 8.354  |
| gnl UG Ssc#S6072742 | darkgreen     | 157.1181 | 23.7294 | 0.876044 | 0.051403 | 7.94   |
| gnl UG Ssc#S6072986 | magenta       | 270.9428 | 78.5974 | 0.989267 | 0.001333 | 45.654 |

|                     |             |          |         |          |          |        |
|---------------------|-------------|----------|---------|----------|----------|--------|
| gnl UG Ssc#S6073178 | blue        | 554.9035 | 167.504 | 0.893303 | 0.041161 | 12.612 |
| gnl UG Ssc#S6073996 | red         | 405.6503 | 87.2187 | 0.948022 | 0.014114 | 12.152 |
| gnl UG Ssc#S6074088 | salmon      | 232.9913 | 47.0218 | 0.972745 | 0.005379 | 17.014 |
| gnl UG Ssc#S6074397 | yellow      | 293.7899 | 107.141 | 0.970477 | 0.006062 | 4.62   |
| gnl UG Ssc#S6074613 | green       | 164.5944 | 22.2401 | 0.384288 | 0.523034 | 10.232 |
| gnl UG Ssc#S6074827 | greenyellow | 179.3854 | 46.6628 | 0.958233 | 0.010182 | 11.912 |
| gnl UG Ssc#S6075131 | darkorange  | 193.5403 | 22.1264 | 0.995586 | 0.000352 | 7.17   |
| gnl UG Ssc#S6075522 | pink        | 217.921  | 64.861  | 0.97546  | 0.004598 | 1.744  |
| gnl UG Ssc#S6075829 | darkred     | 221.7466 | 43.6378 | 0.982241 | 0.002833 | 47.498 |
| gnl UG Ssc#S6076796 | darkred     | 170.5599 | 28.436  | 0.892038 | 0.041887 | 1.628  |
| gnl UG Ssc#S6076838 | blue        | 843.9724 | 246.852 | 0.983962 | 0.002432 | 9.362  |
| gnl UG Ssc#S6077148 | lightyellow | 977.5261 | 62.9986 | 0.998274 | 8.61E-05 | 3.126  |
| gnl UG Ssc#S6077174 | yellow      | 303.8102 | 117.985 | 0.996877 | 0.000209 | 3.658  |
| gnl UG Ssc#S6078209 | yellow      | 302.5129 | 117.356 | 0.994671 | 0.000467 | 1.866  |
| gnl UG Ssc#S6078250 | yellow      | 305.804  | 113.849 | 0.98645  | 0.001889 | 5.832  |
| gnl UG Ssc#S6078867 | lightgreen  | 294.7818 | 57.7942 | 0.987332 | 0.001708 | 2.834  |
| gnl UG Ssc#S6078919 | yellow      | 303.761  | 110.33  | 0.979032 | 0.003633 | 3.664  |
| gnl UG Ssc#S6080666 | darkgreen   | 152.481  | 21.4504 | 0.864022 | 0.058949 | 0.434  |
| gnl UG Ssc#S6081209 | black       | 935.6751 | 96.7083 | 0.993773 | 0.000589 | 5.332  |
| gnl UG Ssc#S6081736 | lightyellow | 937.9645 | 62.8937 | 0.997956 | 0.000111 | 5.138  |
| gnl UG Ssc#S6082387 | black       | 882.9522 | 94.1821 | 0.988783 | 0.001424 | 4.226  |
| gnl UG Ssc#S6083312 | yellow      | 310.4556 | 117.911 | 0.995267 | 0.000391 | 3.864  |
| gnl UG Ssc#S6084972 | navy        | 108.4889 | 8.55761 | 0.282608 | 0.645021 | 34.002 |
| gnl UG Ssc#S6085466 | greenyellow | 142.2819 | 39.1727 | 0.911171 | 0.031354 | 65.856 |
| gnl UG Ssc#S6085536 | green       | 101.3447 | 48.3873 | 0.902507 | 0.036003 | 35.634 |
| gnl UG Ssc#S6085556 | turquoise   | 685.4689 | 187.396 | 0.889118 | 0.043578 | 99.382 |
| gnl UG Ssc#S6085589 | salmon      | 129.4677 | 32.7951 | 0.881042 | 0.048364 | 21.554 |
| gnl UG Ssc#S6085619 | brown       | 106.6558 | 42.0152 | 0.748652 | 0.14543  | 5.708  |
| gnl UG Ssc#S6085659 | magenta     | 239.2236 | 75.5239 | 0.979976 | 0.003391 | 2.596  |
| gnl UG Ssc#S6085740 | brown       | 124.0677 | 44.7379 | 0.916645 | 0.028525 | 45.62  |
| gnl UG Ssc#S6087197 | red         | 452.4234 | 94.2537 | 0.963846 | 0.008207 | 11.114 |
| gnl UG Ssc#S6088059 | brown       | 224.2631 | 59.1888 | 0.889629 | 0.04328  | 5.064  |
| gnl UG Ssc#S6088064 | yellow      | 233.3464 | 76.6451 | 0.899517 | 0.037655 | 0.98   |
| gnl UG Ssc#S6665112 | turquoise   | 904.7865 | 270.264 | 0.980691 | 0.003212 | 11.318 |
| gnl UG Ssc#S6665509 | lightcyan   | 235.3838 | 36.0311 | 0.934749 | 0.019812 | 28.992 |
| gnl UG Ssc#S6666019 | lightyellow | 941.7922 | 63.23   | 0.999015 | 3.71E-05 | 3.244  |
| gnl UG Ssc#S6666342 | brown       | 191.4475 | 53.6656 | 0.760789 | 0.135292 | 17.79  |
| gnl UG Ssc#S6666751 | brown       | 107.5584 | 43.7369 | 0.799726 | 0.104297 | 9.062  |
| gnl UG Ssc#S6667357 | yellow      | 174.1055 | 43.0922 | 0.753942 | 0.140985 | 9.328  |

---



Table S3-1 Calculation of the overlap for each possible pair of modules between LDE and LT in prenatal.

|               | black | blue | brown | darkgreen | darkgrey | darkmagenta | darkorange | darkred | darkturquoise | green | greenyellow | grey | grey60 | lightcyan | lightgreen | lightyellow | magenta | midnightblue | navy | orange | paleturquoise | pink | purple | red | royalblue | salmon | sienna3 | skyblue | skyblue3 | tan | turquoise | violet | white | yellow | yellowgreen | (blank) | Total |
|---------------|-------|------|-------|-----------|----------|-------------|------------|---------|---------------|-------|-------------|------|--------|-----------|------------|-------------|---------|--------------|------|--------|---------------|------|--------|-----|-----------|--------|---------|---------|----------|-----|-----------|--------|-------|--------|-------------|---------|-------|
| black         | 0     | 1    | 9     | 1         | 1        | 2           | 1          | 0       | 0             | 0     | 3           | 0    | 0      | 0         | 0          | 1           | 5       | 0            | 2    | 0      | 1             | 6    | 0      | 3   | 0         | 0      | 0       | 0       | 0        | 0   | 15        | 2      | 0     | 5      | 1           | 2       | 59    |
| blue          | 0     | 43   | 4     | 2         | 0        | 1           | 0          | 12      | 5             | 1     | 0           | 2    | 0      | 3         | 5          | 5           | 10      | 3            | 6    | 3      | 0             | 3    | 0      | 3   | 0         | 2      | 1       | 2       | 0        | 3   | 57        | 5      | 4     | 8      | 1           | 0       | 194   |
| brown         | 1     | 100  | 4     | 1         | 0        | 0           | 0          | 3       | 3             | 1     | 0           | 0    | 1      | 1         | 9          | 5           | 4       | 2            | 2    | 0      | 0             | 4    | 0      | 0   | 0         | 1      | 1       | 0       | 1        | 1   | 28        | 0      | 2     | 1      | 0           | 1       | 176   |
| darkgreen     | 0     | 8    | 0     | 0         | 1        | 0           | 0          | 0       | 1             | 2     | 0           | 0    | 1      | 0         | 2          | 1           | 2       | 2            | 0    | 0      | 0             | 0    | 0      | 0   | 0         | 0      | 2       | 0       | 0        | 0   | 4         | 0      | 2     | 2      | 0           | 1       | 30    |
| darkred       | 0     | 0    | 0     | 2         | 0        | 0           | 0          | 1       | 0             | 1     | 1           | 0    | 0      | 0         | 0          | 2           | 0       | 0            | 2    | 0      | 0             | 0    | 0      | 1   | 0         | 0      | 0       | 0       | 0        | 0   | 19        | 0      | 1     | 2      | 0           | 0       | 32    |
| darkturquoise | 0     | 0    | 0     | 1         | 0        | 0           | 0          | 1       | 2             | 2     | 0           | 0    | 0      | 0         | 0          | 0           | 0       | 0            | 0    | 1      | 0             | 1    | 0      | 1   | 0         | 0      | 1       | 0       | 0        | 0   | 14        | 1      | 1     | 1      | 0           | 0       | 27    |
| green         | 0     | 1    | 13    | 3         | 0        | 1           | 3          | 0       | 0             | 0     | 9           | 0    | 0      | 0         | 0          | 1           | 1       | 0            | 2    | 0      | 0             | 4    | 15     | 3   | 1         | 0      | 0       | 0       | 0        | 0   | 18        | 2      | 4     | 3      | 4           | 1       | 88    |
| greenyellow   | 1     | 13   | 1     | 0         | 0        | 0           | 1          | 2       | 1             | 0     | 0           | 1    | 0      | 0         | 2          | 1           | 2       | 1            | 0    | 0      | 0             | 1    | 1      | 2   | 2         | 0      | 0       | 0       | 0        | 1   | 13        | 1      | 0     | 1      | 0           | 2       | 48    |
| grey          | 0     | 4    | 4     | 0         | 1        | 0           | 0          | 1       | 1             | 0     | 2           | 0    | 0      | 0         | 1          | 0           | 3       | 0            | 2    | 0      | 0             | 4    | 2      | 1   | 0         | 0      | 0       | 0       | 0        | 0   | 11        | 2      | 3     | 6      | 1           | 0       | 49    |
| grey60        | 0     | 0    | 7     | 0         | 2        | 1           | 1          | 0       | 0             | 0     | 2           | 0    | 0      | 0         | 0          | 0           | 0       | 0            | 1    | 0      | 0             | 1    | 2      | 2   | 0         | 0      | 0       | 0       | 0        | 13  | 4         | 0      | 3     | 0      | 0           | 39      |       |
| lightcyan     | 0     | 5    | 3     | 0         | 0        | 0           | 0          | 2       | 0             | 0     | 1           | 0    | 0      | 0         | 1          | 1           | 2       | 2            | 2    | 0      | 0             | 1    | 2      | 0   | 2         | 0      | 0       | 0       | 1        | 12  | 1         | 1      | 2     | 0      | 0           | 42      |       |
| lightgreen    | 2     | 1    | 4     | 1         | 1        | 0           | 0          | 0       | 2             | 0     | 2           | 0    | 2      | 2         | 0          | 1           | 0       | 0            | 0    | 1      | 0             | 2    | 0      | 0   | 0         | 0      | 0       | 0       | 0        | 12  | 0         | 0      | 3     | 0      | 1           | 36      |       |
| lightyellow   | 0     | 0    | 2     | 0         | 2        | 1           | 0          | 1       | 1             | 0     | 0           | 0    | 0      | 0         | 0          | 1           | 4       | 0            | 0    | 0      | 0             | 2    | 0      | 1   | 0         | 0      | 0       | 0       | 0        | 14  | 3         | 1      | 2     | 1      | 0           | 36      |       |
| magenta       | 0     | 8    | 4     | 2         | 1        | 0           | 1          | 1       | 3             | 0     | 1           | 1    | 0      | 0         | 1          | 1           | 4       | 0            | 1    | 0      | 0             | 3    | 0      | 0   | 1         | 0      | 0       | 0       | 0        | 17  | 2         | 1      | 1     | 0      | 0           | 54      |       |
| midnightblue  | 1     | 0    | 6     | 1         | 0        | 0           | 1          | 0       | 0             | 0     | 5           | 0    | 0      | 0         | 0          | 0           | 0       | 0            | 3    | 0      | 0             | 0    | 14     | 1   | 1         | 0      | 0       | 0       | 0        | 3   | 0         | 5      | 0     | 1      | 0           | 42      |       |
| navy          | 0     | 1    | 7     | 1         | 0        | 0           | 2          | 1       | 1             | 0     | 5           | 0    | 0      | 0         | 0          | 0           | 2       | 0            | 5    | 1      | 0             | 0    | 3      | 1   | 0         | 0      | 0       | 0       | 0        | 10  | 0         | 1      | 3     | 1      | 0           | 45      |       |
| pink          | 0     | 0    | 14    | 4         | 0        | 2           | 5          | 0       | 0             | 0     | 3           | 0    | 0      | 0         | 0          | 0           | 0       | 0            | 1    | 0      | 0             | 1    | 4      | 3   | 2         | 0      | 0       | 0       | 0        | 9   | 2         | 5      | 3     | 1      | 0           | 59      |       |
| purple        | 0     | 5    | 0     | 1         | 2        | 1           | 0          | 3       | 0             | 2     | 0           | 0    | 1      | 2         | 0          | 0           | 2       | 1            | 0    | 0      | 0             | 0    | 0      | 0   | 0         | 1      | 2       | 2       | 0        | 27  | 0         | 1      | 1     | 0      | 0           | 54      |       |
| red           | 0     | 1    | 8     | 2         | 0        | 1           | 0          | 1       | 0             | 0     | 4           | 0    | 0      | 0         | 0          | 1           | 3       | 0            | 5    | 0      | 0             | 0    | 12     | 3   | 4         | 0      | 0       | 0       | 0        | 11  | 2         | 1      | 3     | 2      | 0           | 64      |       |
| royalblue     | 0     | 6    | 3     | 1         | 0        | 2           | 2          | 1       | 1             | 0     | 2           | 0    | 0      | 0         | 1          | 1           | 2       | 0            | 3    | 0      | 0             | 0    | 0      | 0   | 0         | 0      | 0       | 0       | 0        | 6   | 0         | 2      | 0     | 0      | 0           | 33      |       |
| salmon        | 0     | 0    | 14    | 3         | 0        | 0           | 1          | 0       | 0             | 0     | 2           | 0    | 2      | 0         | 0          | 0           | 3       | 0            | 1    | 0      | 0             | 1    | 0      | 1   | 0         | 0      | 0       | 0       | 0        | 10  | 0         | 2      | 4     | 1      | 0           | 45      |       |
| tan           | 1     | 4    | 5     | 0         | 1        | 0           | 0          | 1       | 3             | 0     | 0           | 0    | 1      | 1         | 1          | 0           | 4       | 0            | 4    | 0      | 0             | 2    | 0      | 2   | 0         | 0      | 0       | 0       | 1        | 16  | 1         | 0      | 1     | 0      | 1           | 49      |       |
| turquoise     | 69    | 58   | 23    | 31        | 25       | 11          | 15         | 5       | 8             | 104   | 20          | 28   | 42     | 41        | 21         | 18          | 31      | 36           | 33   | 30     | 22            | 61   | 13     | 55  | 29        | 54     | 14      | 29      | 19       | 51  | 1021      | 25     | 14    | 66     | 7           | 54      | 2129  |
| yellow        | 1     | 2    | 7     | 5         | 2        | 1           | 0          | 4       | 4             | 2     | 4           | 2    | 0      | 0         | 3          | 4           | 9       | 3            | 3    | 1      | 3             | 7    | 1      | 3   | 1         | 2      | 1       | 0       | 1        | 2   | 42        | 3      | 4     | 10     | 0           | 1       | 137   |
| (blank)       | 1     | 0    | 0     | 0         | 0        | 0           | 2          | 1       | 3             | 0     | 0           | 0    | 0      | 1         | 0          | 0           | 0       | 1            | 1    | 0      | 0             | 1    | 0      | 0   | 0         | 0      | 1       | 0       | 0        | 15  | 1         | 1      | 1     | 1      | 1           | 0       | 31    |
| Total         | 77    | 261  | ##    | 62        | 39       | 24          | 35         | 41      | 39            | 115   | 66          | 34   | 50     | 51        | 47         | 44          | 93      | 51           | 79   | 37     | 26            | 105  | 69     | 86  | 43        | 60     | 23      | 33      | 22       | 60  | 1417      | 57     | 56    | 132    | 22          | 64      | 3662  |

Table S3-2 Calculation of the overlap for each possible pair of modules between LDE and LT in postnatal.

|               | black | blue | brown | darkgreen | darkgrey | darkmagenta | darkorange | darkred | darkturquoise | green | greenyellow | grey | grey60 | lightcyan | lightgreen | lightyellow | magenta | midnightblue | navy | orange | paleturquoise | pink | purple | red | royalblue | salmon | sienna3 | skyblue | tan | turquoise | violet | white | yellow | yellowgreen | (blank) |
|---------------|-------|------|-------|-----------|----------|-------------|------------|---------|---------------|-------|-------------|------|--------|-----------|------------|-------------|---------|--------------|------|--------|---------------|------|--------|-----|-----------|--------|---------|---------|-----|-----------|--------|-------|--------|-------------|---------|
| black         | 5     | 15   | 2     | 3         | 6        | 2           | 1          | 3       | 2             | 0     | 3           | 0    | 7      | 2         | 1          | 4           | 1       | 0            | 1    | 0      | 0             | 2    | 4      | 1   | 2         | 1      | 0       | 1       | 4   | 31        | 3      | 5     | 6      | 0           | 2       |
| blue          | 11    | 24   | 3     | 1         | 2        | 6           | 0          | 2       | 3             | 0     | 0           | 1    | 11     | 4         | 4          | 10          | 0       | 1            | 6    | 4      | 0             | 0    | 1      | 8   | 4         | 1      | 3       | 2       | 7   | 43        | 9      | 8     | 6      | 0           | 4       |
| brown         | 2     | 25   | 2     | 1         | 2        | 1           | 4          | 6       | 1             | 7     | 8           | 2    | 2      | 1         | 3          | 1           | 1       | 6            | 12   | 1      | 8             | 6    | 7      | 3   | 1         | 10     | 1       | 3       | 2   | 40        | 1      | 4     | 7      | 2           | 3       |
| darkgreen     | 0     | 3    | 13    | 0         | 0        | 2           | 2          | 1       | 0             | 9     | 1           | 2    | 0      | 5         | 0          | 1           | 2       | 1            | 0    | 3      | 1             | 9    | 1      | 3   | 1         | 0      | 1       | 0       | 0   | 10        | 0      | 0     | 1      | 0           | 1       |
| darkgrey      | 3     | 5    | 0     | 1         | 1        | 1           | 0          | 2       | 3             | 0     | 0           | 1    | 0      | 0         | 1          | 2           | 0       | 0            | 0    | 1      | 0             | 2    | 1      | 1   | 0         | 0      | 1       | 0       | 6   | 16        | 5      | 3     | 5      | 0           | 1       |
| darkmagenta   | 0     | 5    | 1     | 0         | 1        | 0           | 1          | 1       | 0             | 0     | 0           | 0    | 1      | 1         | 0          | 0           | 2       | 0            | 1    | 0      | 0             | 2    | 1      | 0   | 0         | 2      | 0       | 0       | 0   | 3         | 0      | 0     | 0      | 0           | 0       |
| darkorange    | 1     | 13   | 0     | 1         | 1        | 1           | 1          | 0       | 0             | 0     | 1           | 0    | 2      | 0         | 0          | 1           | 0       | 0            | 1    | 3      | 0             | 1    | 2      | 4   | 1         | 2      | 1       | 0       | 2   | 16        | 1      | 1     | 1      | 0           | 1       |
| darkred       | 0     | 0    | 13    | 0         | 2        | 0           | 3          | 0       | 0             | 2     | 0           | 2    | 0      | 4         | 0          | 1           | 15      | 1            | 2    | 1      | 0             | 13   | 1      | 4   | 3         | 0      | 0       | 0       | 0   | 4         | 0      | 0     | 1      | 0           | 1       |
| darkturquoise | 2     | 8    | 3     | 2         | 1        | 0           | 0          | 0       | 1             | 4     | 0           | 3    | 1      | 1         | 0          | 2           | 1       | 2            | 1    | 1      | 0             | 1    | 3      | 5   | 2         | 3      | 0       | 0       | 2   | 13        | 1      | 1     | 0      | 0           | 0       |
| green         | 5     | 31   | 4     | 1         | 2        | 1           | 0          | 3       | 1             | 5     | 2           | 1    | 1      | 1         | 2          | 3           | 0       | 1            | 9    | 2      | 4             | 2    | 2      | 1   | 4         | 5      | 0       | 1       | 6   | 25        | 2      | 5     | 5      | 0           | 2       |
| greenyellow   | 0     | 15   | 2     | 1         | 0        | 0           | 1          | 0       | 1             | 5     | 1           | 4    | 4      | 0         | 1          | 0           | 0       | 5            | 1    | 1      | 0             | 2    | 4      | 1   | 3         | 2      | 1       | 0       | 4   | 23        | 5      | 2     | 1      | 0           | 2       |
| grey          | 0     | 1    | 0     | 0         | 1        | 0           | 1          | 0       | 0             | 1     | 0           | 0    | 0      | 0         | 0          | 1           | 1       | 0            | 3    | 0      | 1             | 0    | 1      | 0   | 0         | 1      | 0       | 0       | 1   | 2         | 0      | 1     | 4      | 0           | 0       |
| grey60        | 2     | 6    | 8     | 1         | 0        | 0           | 1          | 1       | 1             | 8     | 1           | 2    | 0      | 1         | 0          | 0           | 0       | 2            | 2    | 2      | 0             | 1    | 2      | 13  | 1         | 2      | 0       | 1       | 0   | 13        | 1      | 0     | 3      | 0           | 3       |
| lightcyan     | 4     | 2    | 7     | 2         | 6        | 0           | 1          | 0       | 4             | 3     | 1           | 1    | 1      | 2         | 1          | 0           | 4       | 1            | 1    | 3      | 0             | 7    | 4      | 2   | 3         | 0      | 0       | 0       | 2   | 13        | 2      | 1     | 4      | 1           | 2       |
| lightgreen    | 2     | 8    | 5     | 1         | 1        | 0           | 1          | 0       | 1             | 3     | 6           | 0    | 0      | 0         | 1          | 2           | 2       | 5            | 1    | 0      | 1             | 8    | 2      | 3   | 6         | 2      | 2       | 1       | 0   | 7         | 1      | 0     | 2      | 2           | 1       |
| lightyellow   | 2     | 4    | 1     | 2         | 2        | 1           | 0          | 2       | 0             | 6     | 4           | 7    | 0      | 0         | 1          | 0           | 0       | 1            | 4    | 0      | 2             | 2    | 3      | 0   | 2         | 6      | 0       | 2       | 1   | 8         | 1      | 2     | 3      | 5           | 2       |
| magenta       | 1     | 2    | 5     | 9         | 0        | 0           | 3          | 2       | 1             | 14    | 18          | 4    | 0      | 2         | 1          | 0           | 1       | 9            | 5    | 0      | 3             | 4    | 2      | 0   | 0         | 6      | 0       | 4       | 0   | 1         | 0      | 0     | 5      | 4           | 4       |
| midnightblue  | 6     | 20   | 1     | 0         | 1        | 0           | 1          | 1       | 2             | 0     | 0           | 0    | 5      | 0         | 1          | 3           | 0       | 1            | 2    | 0      | 0             | 0    | 1      | 2   | 0         | 2      | 0       | 2       | 1   | 21        | 3      | 4     | 3      | 0           | 4       |
| navy          | 4     | 7    | 4     | 6         | 2        | 0           | 1          | 1       | 1             | 12    | 2           | 2    | 0      | 2         | 3          | 1           | 1       | 7            | 5    | 1      | 2             | 5    | 4      | 4   | 2         | 3      | 3       | 4       | 0   | 10        | 1      | 3     | 2      | 3           | 2       |
| orange        | 1     | 4    | 7     | 2         | 2        | 0           | 1          | 0       | 0             | 3     | 0           | 0    | 1      | 2         | 0          | 2           | 2       | 0            | 1    | 1      | 0             | 8    | 2      | 1   | 3         | 1      | 0       | 1       | 0   | 7         | 1      | 1     | 3      | 0           | 3       |
| paleturquoise | 0     | 0    | 6     | 0         | 2        | 0           | 0          | 0       | 0             | 0     | 0           | 4    | 1      | 6         | 0          | 0           | 8       | 0            | 0    | 0      | 0             | 7    | 0      | 2   | 0         | 0      | 0       | 1       | 0   | 1         | 0      | 0     | 0      | 0           | 1       |
| pink          | 3     | 13   | 1     | 8         | 0        | 2           | 1          | 7       | 8             | 2     | 1           | 0    | 5      | 0         | 17         | 4           | 2       | 2            | 5    | 0      | 2             | 0    | 3      | 7   | 0         | 0      | 2       | 1       | 4   | 14        | 5      | 7     | 30     | 0           | 2       |
| purple        | 0     | 11   | 13    | 0         | 0        | 0           | 4          | 0       | 0             | 7     | 0           | 0    | 0      | 4         | 1          | 0           | 1       | 7            | 5    | 3      | 1             | 7    | 4      | 13  | 2         | 0      | 0       | 2       | 1   | 11        | 0      | 0     | 1      | 0           | 3       |
| red           | 7     | 9    | 0     | 2         | 0        | 0           | 0          | 13      | 7             | 2     | 1           | 1    | 3      | 0         | 11         | 4           | 0       | 0            | 0    | 1      | 4             | 1    | 2      | 0   | 1         | 0      | 0       | 1       | 4   | 21        | 10     | 3     | 27     | 1           | 1       |
| royalblue     | 0     | 8    | 1     | 3         | 1        | 0           | 2          | 2       | 2             | 1     | 5           | 3    | 1      | 0         | 0          | 0           | 0       | 1            | 6    | 0      | 5             | 2    | 0      | 2   | 0         | 7      | 0       | 5       | 0   | 8         | 1      | 0     | 3      | 1           | 3       |
| salmon        | 1     | 3    | 25    | 0         | 1        | 0           | 0          | 0       | 0             | 3     | 1           | 1    | 0      | 9         | 0          | 1           | 14      | 0            | 0    | 2      | 0             | 12   | 1      | 2   | 4         | 1      | 1       | 0       | 0   | 2         | 1      | 1     | 2      | 0           | 2       |
| skyblue       | 0     | 0    | 3     | 0         | 0        | 0           | 0          | 3       | 0             | 6     | 3           | 2    | 0      | 1         | 0          | 0           | 1       | 2            | 4    | 0      | 0             | 0    | 4      | 1   | 1         | 3      | 0       | 1       | 1   | 5         | 0      | 2     | 6      | 1           | 1       |
| tan           | 0     | 2    | 9     | 1         | 2        | 1           | 2          | 0       | 0             | 6     | 1           | 2    | 0      | 6         | 0          | 1           | 17      | 1            | 2    | 1      | 0             | 11   | 1      | 6   | 2         | 1      | 0       | 0       | 2   | 8         | 0      | 1     | 2      | 1           | 1       |
| turquoise     | 34    | 81   | 14    | 4         | 10       | 9           | 4          | 2       | 6             | 8     | 7           | 8    | 16     | 11        | 5          | 13          | 18      | 4            | 19   | 4      | 1             | 11   | 7      | 35  | 10        | 8      | 8       | 4       | 23  | 101       | 20     | 17    | 6      | 1           | 12      |
| violet        | 5     | 6    | 3     | 0         | 0        | 0           | 3          | 3       | 3             | 3     | 5           | 0    | 1      | 3         | 3          | 5           | 1       | 5            | 3    | 1      | 0             | 1    | 0      | 0   | 1         | 2      | 1       | 1       | 1   | 7         | 1      | 1     | 13     | 1           | 0       |
| white         | 5     | 4    | 5     | 2         | 0        | 3           | 0          | 5       | 1             | 0     | 1           | 1    | 1      | 2         | 9          | 2           | 0       | 0            | 1    | 3      | 0             | 5    | 2      | 2   | 0         | 1      | 0       | 1       | 1   | 6         | 2      | 0     | 7      | 0           | 0       |
| yellow        | 1     | 13   | 12    | 1         | 1        | 1           | 2          | 0       | 1             | 19    | 4           | 1    | 4      | 3         | 0          | 1           | 1       | 4            | 5    | 5      | 2             | 4    | 7      | 5   | 6         | 4      | 3       | 2       | 3   | 51        | 1      | 0     | 3      | 1           | 1       |
| (blank)       | 1     | 0    | 3     | 2         | 0        | 0           | 1          | 0       | 0             | 2     | 1           | 0    | 0      | 0         | 0          | 1           | 0       | 4            | 1    | 0      | 0             | 2    | 1      | 0   | 0         | 0      | 0       | 1       | 0   | 2         | 1      | 0     | 2      | 0           | 0       |
| total         | 108   | 348  | 176   | 57        | 50       | 31          | 42         | 60      | 50            | 141   | 78          | 55   | 68     | 73        | 66         | 66          | 96      | 73           | 109  | 44     | 37            | 138  | 80     | 131 | 65        | 76     | 28      | 42      | 78  | 543       | 79     | 73    | 164    | 24          | 65      |

Table S4-1 Module eigengene and its evolutionary rates in the common module between LT and LDE (prenatal\_brown vs blue).

| pig_Genebank   | pig_Gene     | LDE    |        |          |            |           | LT       |        |          |          |           | Ka/Ks    |           |          |
|----------------|--------------|--------|--------|----------|------------|-----------|----------|--------|----------|----------|-----------|----------|-----------|----------|
|                |              | Module | kTotal | kWithin  | eigencorr  | eigenpval | meanExpr | Module | kTotal   | kWithin  | eigencorr |          | eigenpval | meanExpr |
| NM_001044620.1 | RABGGTB      | brown  | 249.04 | 124.8191 | 0.98893777 | 0.0013944 | 179.71   | blue   | 318.3339 | 195.6248 | 0.990748  | 0.001067 | 121.186   | 0        |
| AK231026.1     | EIF1AX       | brown  | 213.82 | 107.3751 | 0.95209124 | 0.0124971 | 6.882    | blue   | 261.1911 | 167.7916 | 0.956577  | 0.010791 | 2.072     | --       |
| AK234386.1     | SFT2D1       | brown  | 212.62 | 120.2547 | 0.9813902  | 0.003039  | 19.588   | blue   | 246.2399 | 150.7798 | 0.932176  | 0.020986 | 9.412     | 0.2254   |
| AK234587.1     | WDR41        | brown  | 288.17 | 113.2748 | 0.95779445 | 0.0103424 | 2.758    | blue   | 318.4464 | 192.5385 | 0.986809  | 0.001815 | 1.81      | --       |
| AK234725.1     | GNB1         | brown  | 213.46 | 94.77229 | 0.92165345 | 0.0260131 | 58.926   | blue   | 325.8754 | 180.5844 | 0.970096  | 0.00618  | 51        | --       |
| AK234756.1     |              | brown  | 253.82 | 129.0579 | 0.99642073 | 0.0002569 | 9.152    | blue   | 346.4597 | 203.283  | 0.997839  | 0.000121 | 1.824     | --       |
| AK235272.1     | PJA1         | brown  | 164.45 | 89.47169 | 0.9028537  | 0.0358131 | 8.468    | blue   | 356.6692 | 191.8201 | 0.983143  | 0.002621 | 13.528    | 0.2562   |
| AK235462.1     | PCBP1        | brown  | 342.85 | 79.26756 | 0.85726182 | 0.0633315 | 167.73   | blue   | 350.0833 | 166.1894 | 0.948729  | 0.013828 | 142.348   | 99       |
| AK238658.1     | SBDS         | brown  | 193.57 | 110.4185 | 0.95951522 | 0.0097189 | 3.688    | blue   | 346.4135 | 204.2818 | 0.999226  | 2.58E-05 | 3.912     | --       |
| AK236398.1     | RNASEK       | brown  | 222.3  | 110.2737 | 0.95911856 | 0.0098615 | 9.932    | blue   | 298.0283 | 186.9441 | 0.980622  | 0.003229 | 3.968     | 0        |
| AK236487.1     |              | brown  | 114.22 | 49.46574 | 0.75852779 | 0.1371647 | 6.222    | blue   | 357.2182 | 175.4628 | 0.961839  | 0.008897 | 3.304     | --       |
| AK239385.1     | UTP18        | brown  | 237.41 | 124.7103 | 0.98965298 | 0.0012615 | 49.456   | blue   | 264.4885 | 149.1174 | 0.930825  | 0.021612 | 23.766    | 0.1679   |
| AK239624.1     | YWHAE        | brown  | 280.02 | 107.8752 | 0.94950736 | 0.0135163 | 330.476  | blue   | 205.7209 | 106.9822 | 0.853035  | 0.066121 | 245.668   | 4.6399   |
| AK236671.1     | ATP11A       | brown  | 290.99 | 113.969  | 0.95818846 | 0.0101985 | 117.404  | blue   | 325.6833 | 179.4151 | 0.968841  | 0.006572 | 85.648    | --       |
| AK236730.1     | LMCD1        | brown  | 199.63 | 99.96621 | 0.94285537 | 0.0162569 | 19.694   | blue   | 339.8178 | 197.3246 | 0.990631  | 0.001087 | 13.482    | 0        |
| AK239788.1     | SMN1         | brown  | 212.33 | 119.2819 | 0.97918908 | 0.0035926 | 13.296   | blue   | 319.8552 | 195.6127 | 0.989758  | 0.001242 | 5.924     | 0.3603   |
| AK240329.1     | HSPA4        | brown  | 172.18 | 82.67021 | 0.89685367 | 0.0391452 | 152.368  | blue   | 266.4751 | 166.1274 | 0.954218  | 0.011678 | 132.538   | 99       |
| AK234033.1     | MRPL53       | brown  | 180.13 | 108.7001 | 0.95704422 | 0.0106181 | 20.712   | blue   | 352.2877 | 201.4777 | 0.995471  | 0.000366 | 21.762    | --       |
| AK237193.1     | LOC100287741 | brown  | 229.02 | 105.0811 | 0.94797778 | 0.0141318 | 4.17     | blue   | 328.4439 | 202.9576 | 0.998799  | 4.99E-05 | 1.92      | --       |
| NM_001037146.2 | RPSA         | brown  | 267.45 | 127.3456 | 0.9909574  | 0.0010308 | 82.46    | blue   | 333.354  | 202.314  | 0.997413  | 0.000158 | 11.95     | --       |
| NM_001097521.2 | PGRMC2       | brown  | 175.72 | 106.6943 | 0.95611742 | 0.0109621 | 50.094   | blue   | 365.7034 | 182.6029 | 0.970617  | 0.006019 | 57.542    | 99       |
| AK230942       | ANXA1        | brown  | 253.16 | 128.3025 | 0.9963858  | 0.0002607 | 5.85     | blue   | 330.4868 | 179.2115 | 0.966796  | 0.007227 | 1.432     | --       |
| XM_001924669.1 | APH1A        | brown  | 214.49 | 118.5635 | 0.98131541 | 0.0030573 | 14.186   | blue   | 226.5104 | 131.961  | 0.901225  | 0.036708 | 10.624    | --       |
| XM_001924618.1 | TRAM1        | brown  | 228    | 123.0102 | 0.98653055 | 0.0018727 | 128.9    | blue   | 358.5112 | 183.6464 | 0.972315  | 0.005507 | 74.728    | 99       |
| XM_001926198.1 | PFDN5        | brown  | 280.46 | 102.3997 | 0.93009181 | 0.0219543 | 42.51    | blue   | 360.2501 | 195.3297 | 0.987204  | 0.001734 | 37.11     | 0        |
| XM_001924658.1 | IGF2BP2      | brown  | 134.72 | 65.4409  | 0.84538504 | 0.0712645 | 6.894    | blue   | 302.6184 | 189.4837 | 0.983541  | 0.002529 | 4.006     | 0        |
| XM_001925435.1 | RBM34        | brown  | 288.85 | 117.8611 | 0.97008013 | 0.0061846 | 38.09    | blue   | 347.7404 | 201.0551 | 0.995243  | 0.000394 | 6.956     | 0.3836   |
| XM_001924505.1 | PDGFRL       | brown  | 214.67 | 115.0713 | 0.96959983 | 0.0063337 | 11.59    | blue   | 222.1097 | 123.241  | 0.886324  | 0.045216 | 5.26      | --       |
| AJ000786.1     | TMPRSS11F    | brown  | 181.79 | 107.5492 | 0.95288038 | 0.0121911 | 65.132   | blue   | 334.9394 | 199.4313 | 0.993603  | 0.000614 | 50.004    | --       |
| NM_213901.1    | PCCB         | brown  | 185.82 | 108.7788 | 0.95657893 | 0.0107904 | 4.214    | blue   | 189.4151 | 108.1267 | 0.857876  | 0.062929 | 2.198     | 0        |
| NM_214198.1    | TGFB3        | brown  | 290.68 | 95.41936 | 0.91020695 | 0.0318611 | 6.118    | blue   | 324.113  | 171.6086 | 0.958423  | 0.010113 | 1.156     | 99       |
| NM_214332.1    | GNB2L1       | brown  | 305.03 | 113.7983 | 0.95649466 | 0.0108216 | 505.572  | blue   | 342.2337 | 203.629  | 0.998522  | 6.82E-05 | 152.87    | --       |

|            |        |       |        |          |            |           |         |      |          |          |          |          |         |        |
|------------|--------|-------|--------|----------|------------|-----------|---------|------|----------|----------|----------|----------|---------|--------|
| AY609470.1 | UFM1   | brown | 189.46 | 107.0403 | 0.95083522 | 0.0129893 | 41.19   | blue | 267.3106 | 135.3285 | 0.905021 | 0.034633 | 42.212  | --     |
| AY609565.1 | MRPL1  | brown | 204.97 | 111.6087 | 0.96188346 | 0.0088819 | 6.312   | blue | 314.8444 | 163.2657 | 0.945166 | 0.015286 | 3.096   | --     |
| AY609717.1 | CCT4   | brown | 228.74 | 120.7537 | 0.98204047 | 0.0028814 | 4.718   | blue | 308.1732 | 184.5448 | 0.9755   | 0.004587 | 1       | 0      |
| AY609804.1 | VMA21  | brown | 242.12 | 120.9104 | 0.98172491 | 0.0029575 | 3.918   | blue | 331.6564 | 200.566  | 0.995311 | 0.000385 | 4.796   | 99     |
| AY610090.1 | ELOF1  | brown | 223.61 | 126.9777 | 0.99593819 | 0.0003106 | 7.032   | blue | 361.9018 | 176.2346 | 0.96232  | 0.00873  | 3.19    | --     |
| AY610185.1 | HSPB11 | brown | 255.27 | 122.1203 | 0.98062699 | 0.0032275 | 4.382   | blue | 241.5123 | 148.6904 | 0.927329 | 0.023259 | 1.02    | 99     |
| CF363829   |        | brown | 219.55 | 106.2124 | 0.94971744 | 0.0134325 | 7.026   | blue | 356.1326 | 178.2647 | 0.964297 | 0.008055 | 1.6     | --     |
| BX666142   |        | brown | 224.41 | 112.2891 | 0.96561119 | 0.0076156 | 10.612  | blue | 350.8996 | 201.0348 | 0.994689 | 0.000464 | 9.65    | 99     |
| BX667155   |        | brown | 253.55 | 110.6292 | 0.95643977 | 0.010842  | 3.59    | blue | 339.3718 | 198.3086 | 0.991844 | 0.000883 | 0.892   | --     |
| BX667181   |        | brown | 267.73 | 126.237  | 0.98855156 | 0.0014679 | 20.406  | blue | 324.8194 | 200.5935 | 0.995949 | 0.000309 | 3.754   | --     |
| BX667682   |        | brown | 275.3  | 126.4245 | 0.98853688 | 0.0014708 | 49.36   | blue | 267.5002 | 173.0413 | 0.96368  | 0.008264 | 33.854  | 0      |
| BX670378   |        | brown | 156.14 | 84.08967 | 0.90419709 | 0.0350801 | 56.766  | blue | 249.5213 | 140.6268 | 0.914982 | 0.029375 | 53.774  | --     |
| BX676412   |        | brown | 216.23 | 106.5615 | 0.95414954 | 0.0117041 | 15.692  | blue | 347.7777 | 199.3441 | 0.992733 | 0.000743 | 14.174  | --     |
| BP160416   |        | brown | 256.85 | 128.5886 | 0.99531337 | 0.0003849 | 6.596   | blue | 345.5998 | 198.4721 | 0.991761 | 0.000897 | 1.24    | --     |
| CK449686   |        | brown | 317.57 | 98.846   | 0.91680523 | 0.0284435 | 8.85    | blue | 278.2547 | 173.3047 | 0.963499 | 0.008325 | 5.816   | --     |
| BX915109   |        | brown | 170.71 | 77.00479 | 0.88180825 | 0.0479028 | 3.55    | blue | 250.0752 | 148.196  | 0.927871 | 0.023001 | 2.386   | 0.3771 |
| BX919706   |        | brown | 267.11 | 105.913  | 0.9399028  | 0.0175251 | 11.54   | blue | 269.1813 | 170.3647 | 0.958926 | 0.009931 | 5.776   | --     |
| BX923548   |        | brown | 287.8  | 118.6141 | 0.96881374 | 0.0065802 | 109.696 | blue | 349.3083 | 199.5289 | 0.992806 | 0.000732 | 38.686  | 0.2026 |
| BX926488   |        | brown | 326.72 | 95.81403 | 0.90837408 | 0.0328323 | 595.22  | blue | 364.1545 | 183.9705 | 0.972627 | 0.005414 | 198.92  | --     |
| DN100858   |        | brown | 261.66 | 124.0349 | 0.98590792 | 0.0020039 | 7.258   | blue | 204.669  | 104.0649 | 0.847789 | 0.069635 | 2.65    | 99     |
| DN101483   |        | brown | 262.12 | 123.8465 | 0.98437519 | 0.002339  | 3.594   | blue | 339.1724 | 188.2688 | 0.979092 | 0.003618 | 0.662   | --     |
| DN103747   |        | brown | 208    | 99.52193 | 0.93347664 | 0.0203898 | 10.962  | blue | 295.5339 | 186.3529 | 0.979478 | 0.003518 | 8.178   | --     |
| DN106205   |        | brown | 244.2  | 102.1945 | 0.9346465  | 0.0198579 | 55.258  | blue | 352.2045 | 201.0379 | 0.994884 | 0.000439 | 47.888  | 99     |
| DN107719   |        | brown | 111.83 | 58.76644 | 0.82581866 | 0.0849475 | 127.484 | blue | 188.1681 | 91.01389 | 0.815179 | 0.092691 | 213.292 | --     |
| DN125721   |        | brown | 240.29 | 118.84   | 0.97897875 | 0.0036471 | 8.276   | blue | 332.3567 | 202.9288 | 0.998408 | 7.62E-05 | 3.72    | --     |
| AJ949964   |        | brown | 250.37 | 120.9851 | 0.97889436 | 0.003669  | 0.274   | blue | 358.2577 | 175.6559 | 0.962018 | 0.008835 | 12.588  | --     |
| AJ958642   |        | brown | 164.32 | 92.17831 | 0.91035605 | 0.0317825 | 54.132  | blue | 311.6592 | 175.4183 | 0.963422 | 0.008351 | 35.902  | --     |
| AJ944603   |        | brown | 226.19 | 119.0934 | 0.97834607 | 0.0038126 | 20.596  | blue | 312.6087 | 171.8152 | 0.95868  | 0.01002  | 8.724   | --     |
| CV876445   |        | brown | 261.43 | 123.4503 | 0.98547133 | 0.0020976 | 5.1     | blue | 348.8096 | 192.1888 | 0.984017 | 0.00242  | 1.562   | --     |
| DY424635   |        | brown | 322.16 | 93.92699 | 0.90643725 | 0.0338686 | 17.502  | blue | 256.7648 | 158.1641 | 0.942071 | 0.016591 | 8.336   | 0      |
| DY684916   |        | brown | 179.45 | 94.6511  | 0.93063215 | 0.021702  | 7.724   | blue | 321.296  | 183.7266 | 0.974331 | 0.004918 | 6.382   | --     |
| CT863733   |        | brown | 316.34 | 94.89379 | 0.9040163  | 0.0351784 | 13.616  | blue | 366.3865 | 189.6238 | 0.979633 | 0.003479 | 6.94    | --     |
| AK236628   | ATIC   | brown | 283.16 | 105.1602 | 0.93683932 | 0.0188732 | 5.838   | blue | 358.1656 | 191.1674 | 0.981712 | 0.002961 | 1.328   | 0.0443 |
| DT321969   |        | brown | 297.27 | 110.5478 | 0.95390552 | 0.0117973 | 4.782   | blue | 285.3207 | 172.9709 | 0.962187 | 0.008776 | 8.93    | 0      |
| DT324339   |        | brown | 252.99 | 125.449  | 0.98968275 | 0.001256  | 9.312   | blue | 339.9332 | 202.9129 | 0.998124 | 9.75E-05 | 3.736   | --     |

|          |       |        |          |            |           |         |      |          |          |          |          |        |    |
|----------|-------|--------|----------|------------|-----------|---------|------|----------|----------|----------|----------|--------|----|
| EV857330 | brown | 246.35 | 129.7004 | 0.99915677 | 2.94E-05  | 13.762  | blue | 334.5526 | 197.1242 | 0.990602 | 0.001092 | 4.958  | -- |
| EW023671 | brown | 265.31 | 114.068  | 0.96084756 | 0.009245  | 2.774   | blue | 348.698  | 198.0497 | 0.991515 | 0.000937 | 0.468  | -- |
| EW083818 | brown | 206.13 | 91.89037 | 0.91357953 | 0.0300987 | 2.984   | blue | 300.5677 | 175.8191 | 0.965801 | 0.007553 | 0.612  | -- |
| EW093873 | brown | 257.62 | 124.6871 | 0.98901808 | 0.0013792 | 6.754   | blue | 298.6902 | 191.0741 | 0.985923 | 0.002001 | 3.92   | -- |
| EW136988 | brown | 246.5  | 127.2878 | 0.99442636 | 0.0004991 | 19.844  | blue | 336.8562 | 198.1804 | 0.992334 | 0.000805 | 7.116  | -- |
| EW159788 | brown | 190.11 | 108.3996 | 0.95396911 | 0.011773  | 17.614  | blue | 363.1592 | 193.4346 | 0.984447 | 0.002323 | 8.05   | -- |
| EW167492 | brown | 180.49 | 98.87471 | 0.94070302 | 0.0171784 | 7.038   | blue | 324.1792 | 195.909  | 0.989895 | 0.001217 | 7.222  | -- |
| EW189192 | brown | 142.65 | 66.90363 | 0.85392892 | 0.0655282 | 19.57   | blue | 273.5976 | 156.0351 | 0.939479 | 0.017709 | 20.838 | -- |
| EW191982 | brown | 247.75 | 122.505  | 0.9834288  | 0.0025544 | 3.514   | blue | 326.2109 | 193.5343 | 0.987211 | 0.001733 | 3.838  | -- |
| EW192633 | brown | 250.76 | 124.8443 | 0.98927654 | 0.0013309 | 4.216   | blue | 298.2098 | 186.6372 | 0.980186 | 0.003338 | 1.216  | -- |
| EW196387 | brown | 336.56 | 78.21285 | 0.85266758 | 0.0663656 | 6.33    | blue | 296.7011 | 188.0042 | 0.982224 | 0.002838 | 2.056  | -- |
| EW201887 | brown | 260.04 | 128.6991 | 0.99527079 | 0.0003901 | 8.12    | blue | 339.018  | 195.9195 | 0.988665 | 0.001446 | 3.834  | -- |
| EW206037 | brown | 236.99 | 120.5079 | 0.98116663 | 0.0030938 | 4.664   | blue | 332.4293 | 203.1793 | 0.998719 | 5.50E-05 | 3.77   | -- |
| EW247940 | brown | 228.31 | 124.0724 | 0.98872539 | 0.0014347 | 9.866   | blue | 351.058  | 199.3125 | 0.993059 | 0.000693 | 4.226  | -- |
| EW249284 | brown | 253.38 | 129.4209 | 0.99720333 | 0.0001775 | 3.47    | blue | 347.1372 | 200.746  | 0.994917 | 0.000435 | 0.544  | -- |
| EW310470 | brown | 154.56 | 90.16454 | 0.90550765 | 0.0343697 | 2.694   | blue | 367.12   | 189.5647 | 0.979463 | 0.003522 | 7.45   | -- |
| EW322856 | brown | 172.27 | 91.06197 | 0.9077414  | 0.0331697 | 10.148  | blue | 333.3411 | 187.6131 | 0.979035 | 0.003633 | 11.502 | -- |
| EW359956 | brown | 243.06 | 129.0984 | 0.9977287  | 0.0001299 | 6.334   | blue | 256.8004 | 142.8111 | 0.920372 | 0.026649 | 1.95   | -- |
| EW417768 | brown | 251.81 | 127.6816 | 0.99538165 | 0.0003765 | 10.086  | blue | 257.6308 | 162.0961 | 0.948666 | 0.013854 | 2.65   | -- |
| EW453494 | brown | 272.91 | 126.619  | 0.98881572 | 0.0014175 | 4.398   | blue | 323.8167 | 201.8187 | 0.997674 | 0.000135 | 1.726  | -- |
| EW519341 | brown | 236.46 | 129.4467 | 0.99953871 | 1.19E-05  | 33.396  | blue | 320.1792 | 198.9515 | 0.994662 | 0.000468 | 12.716 | -- |
| EW521970 | brown | 254.72 | 129.822  | 0.99819557 | 9.20E-05  | 12.6    | blue | 327.7698 | 188.4741 | 0.980739 | 0.0032   | 5.176  | -- |
| EW548211 | brown | 204.75 | 118.1622 | 0.9769652  | 0.0041822 | 10.562  | blue | 362.8624 | 184.089  | 0.97286  | 0.005345 | 4.894  | -- |
| EW572865 | brown | 264.42 | 128.1205 | 0.99355189 | 0.000621  | 162.468 | blue | 344.2656 | 201.3455 | 0.995745 | 0.000333 | 42.382 | 99 |
| EW577626 | brown | 243.65 | 125.5164 | 0.99019579 | 0.0011636 | 9.46    | blue | 346.4934 | 182.7073 | 0.972589 | 0.005425 | 6.848  | -- |
| EW588646 | brown | 258.44 | 129.1304 | 0.99608783 | 0.0002936 | 11.696  | blue | 330.3357 | 198.2883 | 0.99277  | 0.000737 | 4.418  | -- |
| EW621683 | brown | 245.52 | 129.7997 | 0.9992501  | 2.46E-05  | 10.638  | blue | 336.3524 | 199.9156 | 0.994565 | 0.000481 | 5.416  | -- |
| BE233268 | brown | 282.99 | 106.8937 | 0.94016013 | 0.0174134 | 4.786   | blue | 354.6322 | 198.7065 | 0.992074 | 0.000846 | 1.134  | -- |
| BG896003 | brown | 276.13 | 122.7158 | 0.98183631 | 0.0029306 | 10.628  | blue | 155.5255 | 78.66299 | 0.789915 | 0.111878 | 4.126  | -- |
| BQ599187 | brown | 198.44 | 105.3165 | 0.94635394 | 0.014795  | 6.576   | blue | 305.3735 | 193.8136 | 0.988878 | 0.001406 | 4.19   | -- |
| BI399871 | brown | 249.34 | 126.9462 | 0.99290757 | 0.0007163 | 10.162  | blue | 339.1626 | 201.3121 | 0.996389 | 0.00026  | 7.798  | -- |
| BI181083 | brown | 223.43 | 124.436  | 0.98976331 | 0.0012414 | 9.148   | blue | 351.2506 | 197.1334 | 0.990198 | 0.001163 | 3.782  | 99 |
| BM190542 | brown | 259.14 | 129.0709 | 0.99611186 | 0.0002909 | 12.012  | blue | 340.9245 | 204.1696 | 0.999415 | 1.70E-05 | 6.87   | -- |

Table S4-2 Module eigengene and its evolutionary rates in the common module between LT and LDE (prenatal\_turquoise vs turquoise).

| pig_Genebank   | pig_Gene | LDEModule | kTotal | kWithin   | eigencorr | eigenpval  | meanExpr | LTModule  | kTotal  | kWithin | eigencorr | eigenpval | meanExpr | Ka/Ks |
|----------------|----------|-----------|--------|-----------|-----------|------------|----------|-----------|---------|---------|-----------|-----------|----------|-------|
| NM_001044558.1 | TMEM59   | turquoise | 1081.5 | 1080.4645 | 0.9090526 | 0.03247164 | 18.144   | turquoise | 977.388 | 922.92  | 0.9782425 | 0.0038399 | 32.088   | 0     |
| NM_001044598.2 | DIRAS3   | turquoise | 1553.6 | 1553.1829 | 0.9965278 | 0.00024548 | 2.692    | turquoise | 1005.67 | 979.158 | 0.9905181 | 0.0011068 | 16.292   | 99    |
| AK230645.1     | LIPA     | turquoise | 1236.5 | 1235.7116 | 0.9389475 | 0.01794204 | 11.15    | turquoise | 559.365 | 538.077 | 0.8446218 | 0.0717842 | 12.822   | 0.842 |
| AK230737.1     | FAM46A   | turquoise | 809.13 | 807.57706 | 0.8473851 | 0.06990828 | 32.576   | turquoise | 374.311 | 277.815 | 0.7015727 | 0.1866919 | 44.822   | --    |
| AK234167.1     | HOXB7    | turquoise | 1050.5 | 1049.4588 | 0.9012849 | 0.03667514 | 1.09     | turquoise | 937.786 | 918.325 | 0.974139  | 0.0049729 | 4.532    | 99    |
| AK234174.1     | TMEM222  | turquoise | 816.27 | 815.51254 | 0.8586057 | 0.06245244 | 31.632   | turquoise | 277.926 | 178.596 | 0.592857  | 0.292057  | 26.714   | 99    |
| AK234189.1     | FDFT1    | turquoise | 1504.4 | 1503.9199 | 0.9881316 | 0.00154935 | 4.612    | turquoise | 979.329 | 904.481 | 0.9729634 | 0.0053149 | 8.492    | 0.034 |
| AK234218.1     | SNX17    | turquoise | 1391.3 | 1390.7561 | 0.9720354 | 0.00559007 | 17.362   | turquoise | 907.737 | 859.838 | 0.9634239 | 0.0083509 | 27.838   | 0     |
| AK234327.1     | TSC22D1  | turquoise | 814.68 | 811.68153 | 0.8482387 | 0.06933194 | 38.908   | turquoise | 844.141 | 798.116 | 0.9411075 | 0.017004  | 53.08    | 99    |
| AK234333.1     | CNN2     | turquoise | 1523.6 | 1523.0436 | 0.9935185 | 0.00062578 | 61.454   | turquoise | 1034.74 | 973.34  | 0.990694  | 0.0010761 | 55.392   | 99    |
| AK234341.1     | FXVD6    | turquoise | 326.87 | 306.32942 | 0.6003028 | 0.28444859 | 110.692  | turquoise | 1008.64 | 940.691 | 0.9824192 | 0.0027909 | 150.458  | 99    |
| AK234347.1     | ABHD14A  | turquoise | 975.91 | 973.15797 | 0.8906305 | 0.0426994  | 12.63    | turquoise | 803.44  | 783.003 | 0.9361852 | 0.0191652 | 8.996    | 0.41  |
| AK237362.1     | MARVEL1  | turquoise | 1214.9 | 1213.1481 | 0.9404773 | 0.01727594 | 74.556   | turquoise | 1029.26 | 970.849 | 0.9898799 | 0.0012202 | 71.51    | --    |
| AK237390.1     | FDFT1    | turquoise | 830.3  | 826.91594 | 0.855621  | 0.06441002 | 44.838   | turquoise | 959.778 | 925.32  | 0.9768476 | 0.0042142 | 49.372   | --    |
| AK237513.1     | PLOD1    | turquoise | 174.67 | 81.931832 | 0.2240019 | 0.71719532 | 55.918   | turquoise | 492.339 | 371.651 | 0.7585681 | 0.1371313 | 37.77    | 0     |
| AK237525.1     | RP9P     | turquoise | 1368.6 | 1367.7254 | 0.9696075 | 0.00633132 | 34.53    | turquoise | 834.403 | 765.455 | 0.931019  | 0.021522  | 27.012   | 99    |
| AK240476.1     | MIR2277  | turquoise | 1473.2 | 1472.7531 | 0.9858082 | 0.00202518 | 5.86     | turquoise | 1020.55 | 992.401 | 0.9941309 | 0.0005393 | 7.646    | 0     |
| AK240506.1     | GAP43    | turquoise | 1505.4 | 1504.8222 | 0.990893  | 0.00104184 | 4.316    | turquoise | 1026.97 | 997.858 | 0.9954013 | 0.0003741 | 20.668   | 99    |
| AK240553.1     | S100B    | turquoise | 1319.7 | 1318.9251 | 0.9548266 | 0.01144702 | 25.808   | turquoise | 882.733 | 866.376 | 0.9594767 | 0.0097327 | 31.344   | --    |
| AK230973.1     | DDX1     | turquoise | 1460.4 | 1459.6857 | 0.9838022 | 0.00246865 | 67.054   | turquoise | 315.018 | 264.575 | 0.6934088 | 0.1941405 | 81.49    | 0     |
| AK234367.1     | PTN      | turquoise | 272.89 | 234.78338 | 0.5153202 | 0.37419669 | 92.414   | turquoise | 456.482 | 419.781 | 0.7948687 | 0.1080303 | 54.692   | --    |
| AK234534.1     | CSRP1    | turquoise | 1542.7 | 1542.2685 | 0.9951306 | 0.0004076  | 54.66    | turquoise | 905.776 | 851.344 | 0.9595967 | 0.0096897 | 51.03    | 0     |
| AK237582.1     | SRPRB    | turquoise | 1499.4 | 1498.8314 | 0.9896313 | 0.00126544 | 12.326   | turquoise | 967.681 | 918.84  | 0.9779268 | 0.0039236 | 18.184   | 0.418 |
| AK240610.1     | FZD5     | turquoise | 1427.1 | 1426.265  | 0.9788141 | 0.00368995 | 21.368   | turquoise | 704.15  | 594.254 | 0.8721817 | 0.0537919 | 20.56    | 99    |
| AK231087.1     | RGS4     | turquoise | 1430.1 | 1429.6119 | 0.9777297 | 0.00397619 | 3.168    | turquoise | 657.616 | 620.213 | 0.8795463 | 0.0492672 | 10.296   | 99    |
| AK231100.1     | COPB1    | turquoise | 1571.2 | 1570.8068 | 0.9996442 | 8.06E-06   | 2.112    | turquoise | 197.912 | 137.051 | 0.5656078 | 0.3203369 | 10.746   | 0     |
| AK231154.1     | C1orf35  | turquoise | 129.71 | 102.62942 | 0.3696599 | 0.5402849  | 25.346   | turquoise | 874.652 | 852.837 | 0.9573262 | 0.0105142 | 20.31    | --    |
| AK231177.1     | CDK19    | turquoise | 1417.8 | 1417.3336 | 0.9731295 | 0.00526612 | 10.27    | turquoise | 88.6916 | 62.7865 | 0.3960835 | 0.5092061 | 20.248   | --    |
| AK231217.1     | FADS1    | turquoise | 405.92 | 393.58023 | 0.6725998 | 0.21349156 | 15.708   | turquoise | 1046.38 | 994.889 | 0.9960211 | 0.0003011 | 11.298   | 0.038 |
| AK234559.1     | FAM176B  | turquoise | 956.74 | 953.23068 | 0.8827745 | 0.04732378 | 64.824   | turquoise | 734.296 | 613.244 | 0.8786462 | 0.0498134 | 67.114   | --    |
| AK234590.1     | YPEL4    | turquoise | 1548.2 | 1547.7895 | 0.996807  | 0.00021649 | 1.214    | turquoise | 903.156 | 883.776 | 0.965699  | 0.0075866 | 2.006    | 0     |
| AK234663.1     | RAB3A    | turquoise | 1470.6 | 1470.0807 | 0.9817578 | 0.00294955 | 3.88     | turquoise | 1034.28 | 1003.66 | 0.996949  | 0.0002022 | 13.654   | 0     |
| AK237762.1     | DCTN1    | turquoise | 975.06 | 973.10739 | 0.8941586 | 0.04067235 | 55.238   | turquoise | 770.902 | 729.748 | 0.9260926 | 0.0238502 | 48.612   | 0     |
| AK237827.1     | MARCKS   | turquoise | 985.25 | 984.29528 | 0.89881   | 0.03804835 | 1002.29  | turquoise | 930.158 | 888.458 | 0.9677235 | 0.0069271 | 1112.53  | --    |

|            |          |           |        |           |           |            |         |           |         |         |           |           |         |       |
|------------|----------|-----------|--------|-----------|-----------|------------|---------|-----------|---------|---------|-----------|-----------|---------|-------|
| AK237870.1 |          | turquoise | 1546.3 | 1545.8307 | 0.997151  | 0.00018247 | 81.3    | turquoise | 997.006 | 920.901 | 0.9772748 | 0.0040983 | 81.514  | --    |
| AK231257.1 | ELAVL4   | turquoise | 1553.6 | 1553.1829 | 0.9965278 | 0.00024548 | 1.748   | turquoise | 1015.27 | 988.541 | 0.9929221 | 0.0007141 | 5.008   | --    |
| AK231416.1 | C7orf36  | turquoise | 1128.4 | 1127.6659 | 0.9243975 | 0.02466897 | 18.944  | turquoise | 256.53  | 196.99  | 0.6197904 | 0.264789  | 21.152  | 0.457 |
| AK234779.1 | RAB1A    | turquoise | 1258.8 | 1257.4658 | 0.9504041 | 0.01315966 | 108.706 | turquoise | 937.333 | 885.019 | 0.9668265 | 0.0072168 | 117.212 | 99    |
| AK234832.1 | BTBD3    | turquoise | 1509   | 1508.4353 | 0.9916703 | 0.00091146 | 77.15   | turquoise | 1021.14 | 959.516 | 0.9874148 | 0.0016916 | 81.33   | --    |
| AK237968.1 | ENO2     | turquoise | 1433.6 | 1433.2155 | 0.9779079 | 0.00392867 | 3.642   | turquoise | 1025.55 | 996.98  | 0.9951566 | 0.0004043 | 11.098  | 0.06  |
| AK238007.1 | KIAA0892 | turquoise | 1434.5 | 1434.1277 | 0.9766456 | 0.00426933 | 6.08    | turquoise | 841.137 | 805.351 | 0.9474823 | 0.0143331 | 8.876   | --    |
| AK231529.1 | MAPK3    | turquoise | 879.1  | 876.89258 | 0.8562247 | 0.06401258 | 48.836  | turquoise | 993.757 | 966.72  | 0.9875325 | 0.001668  | 73.828  | --    |
| AK231444.1 | BCL11A   | turquoise | 1530.5 | 1530.149  | 0.9931124 | 0.00068547 | 12.142  | turquoise | 1019.68 | 992.16  | 0.9938692 | 0.0005757 | 22.828  | --    |
| AK234973.1 | CMAS     | turquoise | 1421.4 | 1420.7424 | 0.979466  | 0.00352129 | 28.906  | turquoise | 785.973 | 697.674 | 0.9093935 | 0.032291  | 42.862  | 99    |
| AK231701.1 | SNORA60  | turquoise | 156.49 | 150.73046 | 0.5174815 | 0.3718402  | 57.002  | turquoise | 1014.94 | 979.292 | 0.9916846 | 0.0009091 | 46.906  | --    |
| AK235000.1 | TM9SF1   | turquoise | 1321.8 | 1320.9456 | 0.9630445 | 0.00848066 | 39.186  | turquoise | 304.288 | 218.005 | 0.6375396 | 0.2472149 | 59.764  | 99    |
| AK235006.1 | ERGIC1   | turquoise | 1351.8 | 1350.7921 | 0.9656324 | 0.00760863 | 25.418  | turquoise | 690.68  | 569.003 | 0.8594083 | 0.0619293 | 48.126  | --    |
| AK235026.1 | CTSC     | turquoise | 1391.5 | 1390.9255 | 0.9713223 | 0.00580462 | 42.016  | turquoise | 1026.26 | 979.542 | 0.9921598 | 0.0008324 | 50.956  | --    |
| AK235041.1 | CNRIP1   | turquoise | 590.25 | 585.25802 | 0.7665103 | 0.13058933 | 36.29   | turquoise | 948.726 | 907.491 | 0.9740266 | 0.0050053 | 51.542  | 0     |
| AK235084.1 | MORF4L2  | turquoise | 1091.5 | 1089.2888 | 0.9164592 | 0.02861959 | 218.056 | turquoise | 613.673 | 503.226 | 0.8301772 | 0.0818358 | 236.442 | 0     |
| AK235131.1 | U2AF1    | turquoise | 787.73 | 783.81118 | 0.8421263 | 0.07349149 | 73.72   | turquoise | 1051.04 | 1000.95 | 0.9971477 | 0.0001828 | 82.9    | --    |
| AK231548.1 | PIGC     | turquoise | 1257.6 | 1256.1552 | 0.9491012 | 0.01367892 | 64.736  | turquoise | 820.495 | 720.032 | 0.9166274 | 0.0285339 | 102.65  | 0     |
| AK231575.1 | SCAMP4   | turquoise | 975.75 | 973.03587 | 0.8929328 | 0.0413731  | 23.474  | turquoise | 330.086 | 238.204 | 0.6528719 | 0.2323005 | 18.768  | 0.258 |
| AK231676.1 | BAMBI    | turquoise | 1095.3 | 1093.5323 | 0.9184648 | 0.0276037  | 4.392   | turquoise | 1006.23 | 967.808 | 0.9889208 | 0.0013976 | 6.458   | 0.146 |
| AK235322.1 | TRAPPC3  | turquoise | 1214.1 | 1212.7913 | 0.9367526 | 0.01891187 | 54.846  | turquoise | 566.939 | 516.788 | 0.8429721 | 0.0729114 | 54.528  | 0     |
| AK235336.1 | CLPTM1L  | turquoise | 1366.4 | 1365.5455 | 0.9674261 | 0.00702273 | 22.282  | turquoise | 519.745 | 450.599 | 0.8046377 | 0.1005634 | 28.988  | 99    |
| AK235358.1 |          | turquoise | 1511.5 | 1511.1228 | 0.9899021 | 0.00121624 | 87.488  | turquoise | 904.061 | 807.05  | 0.9454098 | 0.0151851 | 103.698 | 0     |
| AK235359.1 | 11-Sep   | turquoise | 1447.4 | 1446.6992 | 0.9818666 | 0.00292326 | 101.738 | turquoise | 956.659 | 867.003 | 0.9624796 | 0.0086751 | 125.804 | 0     |
| AK238171.1 | PTPRF    | turquoise | 1506.4 | 1505.8569 | 0.9899714 | 0.00120377 | 21.126  | turquoise | 1051.35 | 1011.93 | 0.999516  | 1.28E-05  | 29.864  | --    |
| AK238267.1 | KIAA1737 | turquoise | 975.15 | 971.95203 | 0.8882382 | 0.04409159 | 25.586  | turquoise | 1035.32 | 998.623 | 0.9964904 | 0.0002495 | 25.792  | --    |
| AK231855.1 | ABHD11   | turquoise | 1279   | 1277.6458 | 0.9525646 | 0.01231325 | 48.664  | turquoise | 884.152 | 776.769 | 0.936352  | 0.0190907 | 50.232  | 99    |
| AK231895.1 | NUDT21   | turquoise | 235.26 | 211.67323 | 0.519946  | 0.36915748 | 30.526  | turquoise | 1011.16 | 961.773 | 0.9872916 | 0.0017165 | 29.794  | 99    |
| AK235196.1 |          | turquoise | 1546.2 | 1545.6807 | 0.9971914 | 0.0001786  | 64.394  | turquoise | 321.426 | 224.453 | 0.6358267 | 0.2488967 | 100.08  | --    |
| AK235227.1 | FBXL2    | turquoise | 1159.4 | 1157.9101 | 0.9287392 | 0.0225898  | 5.128   | turquoise | 971.383 | 942.263 | 0.9818285 | 0.0029325 | 5.506   | --    |
| AK235381.1 | NAP1L3   | turquoise | 1430.7 | 1430.2386 | 0.9762307 | 0.00438333 | 10.81   | turquoise | 902.266 | 872.469 | 0.962165  | 0.008784  | 22.288  | 0.266 |
| AK235410.1 | DDX6     | turquoise | 566.42 | 560.91524 | 0.7661381 | 0.13089375 | 12.432  | turquoise | 591.324 | 573.904 | 0.8648802 | 0.0583994 | 22.202  | 99    |
| AK235434.1 | EIF1B    | turquoise | 338.27 | 319.9875  | 0.6319611 | 0.2527033  | 58.656  | turquoise | 670.214 | 637.113 | 0.8854213 | 0.045749  | 58.6    | 99    |
| AK235450.1 | GNB2     | turquoise | 1435.3 | 1434.6779 | 0.9802268 | 0.00332779 | 247.09  | turquoise | 1049.02 | 1000.1  | 0.9968576 | 0.0002114 | 252.93  | --    |
| AK235476.1 | RRAGB    | turquoise | 125.67 | 99.99391  | 0.39005   | 0.51626991 | 19.072  | turquoise | 1010.65 | 983.441 | 0.9916434 | 0.0009159 | 26.274  | --    |
| AK235477.1 | TNRC6A   | turquoise | 1268.2 | 1267.6898 | 0.9517227 | 0.0126409  | 106.994 | turquoise | 1002.23 | 968.934 | 0.9885947 | 0.0014597 | 97.93   | --    |

|            |          |           |        |           |           |            |         |           |         |         |           |           |         |       |
|------------|----------|-----------|--------|-----------|-----------|------------|---------|-----------|---------|---------|-----------|-----------|---------|-------|
| AK235508.1 | PAPSS1   | turquoise | 1381   | 1380.0376 | 0.9709571 | 0.00591551 | 76.292  | turquoise | 873.659 | 760.305 | 0.9304201 | 0.0218009 | 69.356  | --    |
| AK235521.1 | AUP1     | turquoise | 966.08 | 963.63862 | 0.8885387 | 0.04391596 | 16.928  | turquoise | 353.631 | 285.486 | 0.6947987 | 0.1928666 | 17.57   | 99    |
| AK235558.1 | PPM1M    | turquoise | 1373.5 | 1372.6713 | 0.9684662 | 0.0066901  | 8.904   | turquoise | 1041.19 | 1001.59 | 0.9969227 | 0.0002048 | 8.27    | 0     |
| AK235559.1 | HMGCS1   | turquoise | 1535.8 | 1535.3307 | 0.9954299 | 0.00037061 | 56.876  | turquoise | 1004.16 | 951.031 | 0.9845169 | 0.0023073 | 100.382 | 99    |
| AK232310.1 | ALDH1A1  | turquoise | 100.27 | 52.238913 | 0.1996886 | 0.74744859 | 0.284   | turquoise | 618.487 | 596.83  | 0.8685423 | 0.0560736 | 4.66    | 0     |
| AK232326.1 | WWP2     | turquoise | 1555.8 | 1555.4291 | 0.9968502 | 0.00021211 | 42.678  | turquoise | 1051.3  | 1012.41 | 0.9995577 | 1.12E-05  | 16.728  | --    |
| AK232329.1 | CNDP2    | turquoise | 1458.4 | 1457.8276 | 0.98377   | 0.00247601 | 30.666  | turquoise | 743.099 | 605.066 | 0.8750617 | 0.0520075 | 37.664  | 0.145 |
| AK235612.1 | SERPINH1 | turquoise | 645.35 | 641.88888 | 0.8019326 | 0.10261482 | 561.656 | turquoise | 815.046 | 698.135 | 0.9098374 | 0.0320561 | 411.43  | 0     |
| AK235633.1 | TRIM54   | turquoise | 788.98 | 785.42839 | 0.8441136 | 0.07213087 | 7.53    | turquoise | 950.431 | 917.995 | 0.9752177 | 0.0046658 | 10.114  | --    |
| AK235634.1 | SMAP1    | turquoise | 1322.5 | 1321.4    | 0.9582408 | 0.01017943 | 54.46   | turquoise | 924.668 | 851.832 | 0.958659  | 0.0100275 | 57.382  | 99    |
| AK235644.1 | RAB5C    | turquoise | 309.08 | 297.28238 | 0.6280223 | 0.25659794 | 99.152  | turquoise | 1022.91 | 991.458 | 0.9941631 | 0.0005348 | 86.814  | 99    |
| AK235648.1 | CD24     | turquoise | 1549.3 | 1548.8822 | 0.9957464 | 0.0003328  | 35.246  | turquoise | 1015.83 | 988.989 | 0.9930476 | 0.0006952 | 73.526  | 0.977 |
| AK235657.1 | CDK8     | turquoise | 1371.4 | 1370.801  | 0.9645176 | 0.00798047 | 25.382  | turquoise | 922.465 | 845.464 | 0.9573505 | 0.0105053 | 28.56   | --    |
| AK235709.1 | FMNL3    | turquoise | 1335.6 | 1334.6255 | 0.9623393 | 0.00872364 | 35.576  | turquoise | 334.738 | 251.316 | 0.670739  | 0.2152468 | 28.362  | --    |
| AK238597.1 | C16orf72 | turquoise | 378.19 | 367.24848 | 0.6672275 | 0.21856998 | 155.276 | turquoise | 1039.58 | 990.245 | 0.9943558 | 0.0005086 | 160.174 | --    |
| AK238611.1 | CD200    | turquoise | 1491   | 1490.6302 | 0.9852805 | 0.002139   | 11.066  | turquoise | 576.755 | 560.264 | 0.8546241 | 0.0650681 | 19.624  | --    |
| AK238616.1 | ADRBK1   | turquoise | 1469.8 | 1469.1267 | 0.986119  | 0.00195912 | 27.102  | turquoise | 737.711 | 648.921 | 0.8936497 | 0.0409628 | 33.42   | --    |
| AK238622.1 | PA2G4    | turquoise | 1565.7 | 1565.2339 | 0.9994687 | 1.47E-05   | 50.96   | turquoise | 902.641 | 808.233 | 0.9467037 | 0.0146513 | 73.38   | 99    |
| AK238655.1 | hCG_3898 | turquoise | 453.1  | 448.4124  | 0.7266577 | 0.16433606 | 34.614  | turquoise | 975.812 | 949.493 | 0.983251  | 0.0025955 | 28.56   | --    |
| AK238706.1 | LXN      | turquoise | 794.6  | 792.22095 | 0.8342224 | 0.07898004 | 61.432  | turquoise | 369.004 | 330.934 | 0.7281506 | 0.1630317 | 71.08   | 99    |
| AK232354.1 | SLC37A4  | turquoise | 1295.9 | 1294.7383 | 0.9548978 | 0.01142013 | 7.282   | turquoise | 1045.62 | 996.058 | 0.9959024 | 0.0003147 | 18.096  | 99    |
| AK232477.1 | PRKCZ    | turquoise | 1521.2 | 1520.8189 | 0.9911531 | 0.00099757 | 0.982   | turquoise | 1010.79 | 984.754 | 0.9919484 | 0.0008662 | 5.846   | 0     |
| AK235788.1 | RARRES1  | turquoise | 321.44 | 317.55097 | 0.6464913 | 0.23847643 | 3.758   | turquoise | 990.283 | 965.549 | 0.9870059 | 0.0017746 | 5.198   | 0     |
| AK235829.1 | KIAA0174 | turquoise | 1228.7 | 1227.7305 | 0.9468431 | 0.01459417 | 71.226  | turquoise | 617.239 | 560.685 | 0.8608854 | 0.06097   | 101.35  | 0     |
| AK235833.1 | BECN1    | turquoise | 407.89 | 400.22433 | 0.6911324 | 0.19623215 | 56.152  | turquoise | 921.263 | 824.15  | 0.9502412 | 0.0132242 | 63.248  | 0     |
| AK235860.1 | CDK9     | turquoise | 329.04 | 318.34785 | 0.6437645 | 0.24112922 | 63.136  | turquoise | 792.856 | 753.886 | 0.927944  | 0.0229662 | 67.562  | 0     |
| AK235879.1 | ANTXR1   | turquoise | 1457.4 | 1456.7396 | 0.9845914 | 0.00229072 | 11.168  | turquoise | 345.72  | 316.006 | 0.7430308 | 0.1501977 | 12.506  | --    |
| AK235881.1 | PIRC34   | turquoise | 1115.1 | 1114.4304 | 0.9250588 | 0.02434847 | 56.246  | turquoise | 961.749 | 881.455 | 0.9665865 | 0.007295  | 107.178 | 99    |
| AK235892.1 | SEC11A   | turquoise | 1107.6 | 1105.8042 | 0.9232587 | 0.02522403 | 45.186  | turquoise | 1042.66 | 1008.49 | 0.9984843 | 7.08E-05  | 43.424  | --    |
| AK235949.1 | GPR125   | turquoise | 1359.3 | 1358.4546 | 0.968024  | 0.00683088 | 57.056  | turquoise | 903.962 | 808.291 | 0.9454254 | 0.0151786 | 59.524  | 0.082 |
| AK235971.1 | GAS2     | turquoise | 1526   | 1525.4991 | 0.993469  | 0.00063296 | 90.356  | turquoise | 724.268 | 578.965 | 0.8640621 | 0.058923  | 87.472  | --    |
| AK238760.1 | PPIL1    | turquoise | 1000.7 | 997.49471 | 0.892947  | 0.04136492 | 32.854  | turquoise | 1052.42 | 1003.09 | 0.9976686 | 0.0001351 | 34.748  | 0     |
| AK238779.1 | MARCKS1  | turquoise | 261.3  | 222.64196 | 0.5009871 | 0.38991415 | 60.228  | turquoise | 1009.72 | 982.821 | 0.9915124 | 0.0009375 | 43.584  | --    |
| AK238807.1 | PRELID1  | turquoise | 292.95 | 258.33517 | 0.5465933 | 0.34045755 | 95.998  | turquoise | 950.845 | 859.997 | 0.9605845 | 0.0093379 | 83.75   | --    |
| AK238832.1 | TNRC6A   | turquoise | 131.14 | 108.53454 | 0.3946681 | 0.51086146 | 41.966  | turquoise | 660.548 | 635.179 | 0.885056  | 0.0459653 | 36.522  | --    |
| AK238888.1 | HP1BP3   | turquoise | 163.18 | 111.93457 | 0.3470361 | 0.56717657 | 20.862  | turquoise | 518.909 | 503.899 | 0.8339547 | 0.0791681 | 38.736  | 99    |



|            |          |           |        |           |           |            |         |           |         |         |           |           |         |       |
|------------|----------|-----------|--------|-----------|-----------|------------|---------|-----------|---------|---------|-----------|-----------|---------|-------|
| AK232622.1 | GABARA1  | turquoise | 779.81 | 775.4585  | 0.8381612 | 0.07622959 | 18.582  | turquoise | 989.785 | 966.602 | 0.9870947 | 0.0017565 | 17.62   | --    |
| AK232649.1 | STX12    | turquoise | 1105.3 | 1104.0661 | 0.9189823 | 0.0273435  | 35.31   | turquoise | 875.967 | 852.125 | 0.9560567 | 0.0109847 | 97.338  | 0.213 |
| AK236042.1 | RAD51L3  | turquoise | 1519.9 | 1519.4991 | 0.990114  | 0.0011782  | 8.302   | turquoise | 889.799 | 787.755 | 0.9392333 | 0.017817  | 9.17    | 0.258 |
| AK236110.1 | RPA1     | turquoise | 1481.5 | 1480.8763 | 0.9870932 | 0.00175679 | 40.794  | turquoise | 822.935 | 719.544 | 0.9199834 | 0.0268424 | 45.538  | 0     |
| AK236160.1 | CHST10   | turquoise | 1365.4 | 1364.5436 | 0.969466  | 0.00637544 | 51.184  | turquoise | 137.237 | 103.194 | 0.5176487 | 0.371658  | 60.764  | 0     |
| AK238961.1 | AES      | turquoise | 1355   | 1353.9119 | 0.9676264 | 0.00695826 | 198.012 | turquoise | 986.655 | 932.459 | 0.9801195 | 0.0033549 | 189.538 | --    |
| AK239055.1 | RNF207   | turquoise | 1470.3 | 1469.6471 | 0.985299  | 0.00213499 | 21.432  | turquoise | 234.648 | 167.851 | 0.5807485 | 0.3045405 | 24.988  | --    |
| AK239094.1 | SFRP1    | turquoise | 1446.4 | 1445.6583 | 0.981041  | 0.00312478 | 47.83   | turquoise | 1042.2  | 1008.22 | 0.9982801 | 8.56E-05  | 38.442  | --    |
| AK236193.1 | ARF3     | turquoise | 375.35 | 356.97992 | 0.6376148 | 0.24714105 | 23.482  | turquoise | 980.799 | 954.877 | 0.9843812 | 0.0023377 | 15.072  | --    |
| AK236213.1 | CDC42EP2 | turquoise | 1537.9 | 1537.5472 | 0.9944199 | 0.00049996 | 2.924   | turquoise | 402.388 | 296.477 | 0.7085529 | 0.1803895 | 4.306   | 99    |
| AK236249.1 | VAT1     | turquoise | 1398.6 | 1397.6478 | 0.9747364 | 0.00480201 | 75.79   | turquoise | 964.761 | 901.671 | 0.9725256 | 0.0054441 | 85.824  | 0     |
| AK236339.1 | PSMD2    | turquoise | 973.85 | 970.67084 | 0.8880222 | 0.04421804 | 91.254  | turquoise | 1052.63 | 1011.17 | 0.9993167 | 2.14E-05  | 83.81   | 99    |
| AK239198.1 | PIK3R3   | turquoise | 1031.8 | 1028.8306 | 0.9002687 | 0.03723706 | 14.132  | turquoise | 933.664 | 852.757 | 0.9579483 | 0.0102861 | 19.874  | --    |
| AK239277.1 | LIMD2    | turquoise | 1110.4 | 1108.771  | 0.918885  | 0.02739236 | 9.066   | turquoise | 860.955 | 797.137 | 0.9434161 | 0.0160196 | 10.954  | 0.246 |
| AK239294.1 | RSL24D1  | turquoise | 1007.8 | 1005.5343 | 0.9004981 | 0.03710996 | 52.868  | turquoise | 1009.83 | 977.205 | 0.991137  | 0.0010003 | 49.97   | --    |
| AK239337.1 | AFF3     | turquoise | 1319.2 | 1318.1551 | 0.9592062 | 0.0098299  | 10.818  | turquoise | 976.207 | 926.601 | 0.9783702 | 0.0038063 | 9.232   | --    |
| AK239352.1 | PIAS3    | turquoise | 1442.9 | 1442.2126 | 0.9818321 | 0.00293159 | 24.794  | turquoise | 915.864 | 821.916 | 0.9495287 | 0.0135078 | 25.198  | --    |
| AK230496.1 | CASP3    | turquoise | 938.65 | 935.34937 | 0.8794645 | 0.04931672 | 72.87   | turquoise | 839.294 | 808.58  | 0.9447682 | 0.0154521 | 60.462  | 0.172 |
| AK230522.1 | FUT8     | turquoise | 1527.9 | 1527.4485 | 0.9926244 | 0.00075954 | 14.82   | turquoise | 1042.22 | 992.211 | 0.9949966 | 0.0004245 | 14.592  | 0     |
| AK230524.1 | VPS4B    | turquoise | 1267.5 | 1266.1327 | 0.9506886 | 0.01304717 | 6.93    | turquoise | 711.329 | 588.325 | 0.8694186 | 0.0555215 | 12.24   | --    |
| AK230555.1 | PPIL4    | turquoise | 1256.6 | 1255.4375 | 0.9444732 | 0.01557532 | 18.608  | turquoise | 328.05  | 291.34  | 0.7214926 | 0.1688719 | 25.69   | 0.497 |
| AK230594.1 | B4GALT4  | turquoise | 1516.5 | 1516.0572 | 0.9898564 | 0.0012245  | 3.29    | turquoise | 1025.22 | 990.345 | 0.9940561 | 0.0005496 | 3.838   | 0     |
| AK230621.1 | DCAF10   | turquoise | 1405.5 | 1404.9422 | 0.976987  | 0.00417626 | 44.86   | turquoise | 672.951 | 528.094 | 0.8424845 | 0.0732457 | 51.622  | --    |
| AK232758.1 | HABP4    | turquoise | 814.1  | 810.11672 | 0.8476255 | 0.06974584 | 17.754  | turquoise | 945.528 | 887.298 | 0.9699522 | 0.0062242 | 20.234  | --    |
| AK236374.1 | NUP93    | turquoise | 1143.9 | 1142.0118 | 0.9277435 | 0.02306136 | 32.044  | turquoise | 1049.75 | 1003.35 | 0.9979219 | 0.0001137 | 38.648  | --    |
| AK236407.1 | ANO10    | turquoise | 1544.9 | 1544.4869 | 0.9964564 | 0.00025309 | 7.48    | turquoise | 267.798 | 225.404 | 0.6762366 | 0.2100726 | 8.818   | 0     |
| AK236435.1 | WDR13    | turquoise | 645.03 | 638.70145 | 0.7932789 | 0.10926061 | 34.206  | turquoise | 720.348 | 676.21  | 0.9038541 | 0.0352667 | 44.142  | 99    |
| AK236453.1 | FAM129A  | turquoise | 1443.4 | 1442.9479 | 0.9765255 | 0.00430223 | 14.526  | turquoise | 800.892 | 707.295 | 0.9132581 | 0.0302653 | 20.676  | 0.522 |
| AK236499.1 | SLC20A1  | turquoise | 1527.8 | 1527.2592 | 0.9944829 | 0.00049153 | 9.328   | turquoise | 704.433 | 586.631 | 0.8692225 | 0.0556449 | 21.882  | --    |
| AK232930.1 | AMN1     | turquoise | 1483.1 | 1482.4659 | 0.9882016 | 0.00153567 | 14.884  | turquoise | 574.223 | 452.193 | 0.8144765 | 0.0932098 | 30.826  | --    |
| AK239359.1 | HCFC1    | turquoise | 1355.1 | 1354.0818 | 0.9684147 | 0.00670644 | 36.628  | turquoise | 899.976 | 795.21  | 0.9418801 | 0.0166724 | 40.078  | --    |
| AK239497.1 | SFRS3    | turquoise | 536.07 | 523.39729 | 0.7320339 | 0.15965292 | 232.17  | turquoise | 851.322 | 770.265 | 0.9337878 | 0.0202479 | 177.418 | 99    |
| AK239620.1 | ASXL1    | turquoise | 1139.8 | 1139.2752 | 0.9278074 | 0.02303104 | 69.82   | turquoise | 722.473 | 705.099 | 0.9093231 | 0.0323282 | 55.328  | --    |
| AK239666.1 | MAN2B1   | turquoise | 1166.6 | 1164.973  | 0.9337175 | 0.02027995 | 22.234  | turquoise | 344.729 | 273.398 | 0.6909015 | 0.1964447 | 14.65   | 99    |
| AK239676.1 | RSL1D1   | turquoise | 643.29 | 642.55311 | 0.8060999 | 0.09945988 | 38.74   | turquoise | 1022.58 | 972.912 | 0.9904545 | 0.0011179 | 31.068  | --    |
| AK239723.1 | BASP1    | turquoise | 1568.9 | 1568.5466 | 0.9993662 | 1.92E-05   | 58.992  | turquoise | 1031.47 | 998.938 | 0.9958177 | 0.0003245 | 91.154  | 99    |

|            |          |           |        |           |           |            |         |           |         |         |           |           |         |       |
|------------|----------|-----------|--------|-----------|-----------|------------|---------|-----------|---------|---------|-----------|-----------|---------|-------|
| AK232985.1 | ETV1     | turquoise | 1460.8 | 1460.0958 | 0.9834954 | 0.00253901 | 6.554   | turquoise | 1039.34 | 993.398 | 0.9951362 | 0.0004069 | 12.92   | --    |
| AK236576.1 | PDIA4    | turquoise | 134.26 | 76.24129  | 0.2472985 | 0.68836924 | 191.344 | turquoise | 1001.49 | 964.225 | 0.9883167 | 0.0015133 | 121.488 | 0.056 |
| AK236599.1 | NAE1     | turquoise | 1541.2 | 1540.7315 | 0.996345  | 0.00026511 | 8.912   | turquoise | 637.079 | 547.088 | 0.8566701 | 0.0637198 | 15.84   | --    |
| AK236654.1 | ACTN1    | turquoise | 1466.4 | 1465.7069 | 0.9830492 | 0.00264247 | 42.71   | turquoise | 937.853 | 894.061 | 0.9694252 | 0.0063882 | 44.298  | 0     |
| AK236655.1 | ATP6V1B  | turquoise | 1101.1 | 1099.9214 | 0.9090826 | 0.03245571 | 80.03   | turquoise | 991.734 | 963.744 | 0.9868588 | 0.0018048 | 88.468  | --    |
| AK236660.1 | CSNK1E   | turquoise | 697.33 | 693.91906 | 0.808429  | 0.09770963 | 34.586  | turquoise | 1046.56 | 1005.54 | 0.9982061 | 9.12E-05  | 37.81   | 0     |
| AK239758.1 | RNPS1    | turquoise | 1498.6 | 1498.1953 | 0.9878686 | 0.00160106 | 37.594  | turquoise | 532.376 | 395.774 | 0.7740073 | 0.1245019 | 67.028  | --    |
| AK239777.1 | NUP50    | turquoise | 969.11 | 967.25971 | 0.8880037 | 0.04422883 | 23.882  | turquoise | 596.247 | 447.919 | 0.8039438 | 0.1010885 | 33.034  | 0.101 |
| AK239913.1 | PTH      | turquoise | 1553.4 | 1553.0099 | 0.9968909 | 0.00020801 | 23.416  | turquoise | 502.242 | 471.359 | 0.8137261 | 0.0937646 | 33.19   | --    |
| AK236816.1 | BACH2    | turquoise | 1366.4 | 1365.6735 | 0.9637937 | 0.00822501 | 18.052  | turquoise | 1024.5  | 982.653 | 0.9925527 | 0.0007706 | 16.782  | --    |
| AK233216.1 | EFHA1    | turquoise | 61.945 | 52.519007 | 0.3001667 | 0.62363516 | 0.674   | turquoise | 327.278 | 285.105 | 0.7062884 | 0.1824274 | 5.9     | --    |
| AK233236.1 | EPB41    | turquoise | 1368.6 | 1367.5526 | 0.9698726 | 0.0062489  | 40.63   | turquoise | 999.867 | 927.593 | 0.9794512 | 0.0035251 | 34.198  | --    |
| AK233255.1 | C10orf35 | turquoise | 1553.6 | 1553.1829 | 0.9965278 | 0.00024548 | 0.378   | turquoise | 1031.01 | 1001.09 | 0.9962725 | 0.000273  | 2.378   | --    |
| AK233339.1 | ZNF516   | turquoise | 1552   | 1551.6272 | 0.9972804 | 0.00017019 | 26.128  | turquoise | 956.803 | 900.341 | 0.9717726 | 0.0056688 | 34.04   | --    |
| AK239962.1 | TWIST2   | turquoise | 1558.9 | 1558.5429 | 0.9979279 | 0.0001132  | 9.9     | turquoise | 1044.92 | 1006.69 | 0.9981719 | 9.38E-05  | 5.008   | 99    |
| AK239969.1 | TMEM127  | turquoise | 1122.5 | 1120.7757 | 0.925224  | 0.02426862 | 15.384  | turquoise | 196.297 | 151.348 | 0.5601645 | 0.3260653 | 22.32   | --    |
| AK240077.1 | SUMO2    | turquoise | 274.6  | 240.8479  | 0.5283825 | 0.36000968 | 299.774 | turquoise | 1042.84 | 991.534 | 0.9948147 | 0.0004479 | 201.248 | 99    |
| AK240079.1 | PDGFRB   | turquoise | 115.58 | 89.566946 | 0.3291437 | 0.58861604 | 31.662  | turquoise | 186.808 | 122.817 | 0.5011542 | 0.38973   | 28.994  | --    |
| AK240098.1 | PAFAH1B  | turquoise | 1321.9 | 1320.8368 | 0.9622008 | 0.00877161 | 28.906  | turquoise | 937.381 | 894.067 | 0.9695596 | 0.0063462 | 27.968  | --    |
| AK240146.1 | CXCL12   | turquoise | 1503.2 | 1502.7606 | 0.9899194 | 0.00121313 | 40.826  | turquoise | 707.542 | 689.501 | 0.9054959 | 0.034376  | 75.204  | --    |
| AK233368.1 | NAP1L1   | turquoise | 215.83 | 167.20457 | 0.4325895 | 0.46690621 | 78.666  | turquoise | 324.313 | 249.449 | 0.6621786 | 0.2233727 | 66.846  | 0     |
| AK233462.1 | FEZ1     | turquoise | 1558.6 | 1558.154  | 0.9979055 | 0.00011503 | 7.258   | turquoise | 1017    | 989.791 | 0.9933479 | 0.0006506 | 24.05   | 0     |
| AK233502.1 | TCFL5    | turquoise | 1518.5 | 1517.9607 | 0.9925653 | 0.00076868 | 25.046  | turquoise | 742.879 | 600.936 | 0.8743181 | 0.0524664 | 28.232  | --    |
| AK237028.1 | FCHO1    | turquoise | 162.21 | 140.7328  | 0.4520484 | 0.44468637 | 5.362   | turquoise | 868.271 | 852.694 | 0.9554707 | 0.0112042 | 3.338   | 99    |
| AK237091.1 | RPS5P3   | turquoise | 1456.7 | 1455.9828 | 0.9837851 | 0.00247255 | 21.26   | turquoise | 946.681 | 870.733 | 0.9632368 | 0.0084148 | 23.008  | --    |
| AK233581.1 | SERPING1 | turquoise | 1420.4 | 1419.9813 | 0.9734037 | 0.00518592 | 17.066  | turquoise | 872.297 | 813.651 | 0.9513554 | 0.0127847 | 13.222  | --    |
| AK233667.1 | HS2ST1   | turquoise | 1104.2 | 1103.3298 | 0.9221114 | 0.02578722 | 22.766  | turquoise | 864.946 | 831.933 | 0.951076  | 0.0128945 | 18.58   | --    |
| AK233731.1 | DPYSL3   | turquoise | 1120.4 | 1118.5308 | 0.9231645 | 0.02527011 | 94.22   | turquoise | 1045.03 | 1001.31 | 0.9969653 | 0.0002006 | 96.498  | --    |
| AK240176.1 | APCDD1   | turquoise | 1133.6 | 1132.64   | 0.9167803 | 0.02845617 | 14.732  | turquoise | 660.256 | 630.376 | 0.8826221 | 0.0474149 | 13.942  | --    |
| AK240211.1 | TGFBI    | turquoise | 1012.6 | 1010.4156 | 0.9028784 | 0.03579953 | 208.94  | turquoise | 284.318 | 223.2   | 0.6619745 | 0.2235674 | 186.958 | 0.036 |
| AK240222.1 | PTK2     | turquoise | 1221   | 1219.7011 | 0.9371363 | 0.01874112 | 55.294  | turquoise | 672.071 | 555.408 | 0.8606504 | 0.0611223 | 65.86   | --    |
| AK240296.1 | CCT7     | turquoise | 235    | 209.77691 | 0.5112089 | 0.37868933 | 64.742  | turquoise | 857.821 | 822.384 | 0.9501943 | 0.0132428 | 79.196  | 0     |
| AK240334.1 | MPZL2    | turquoise | 1553.3 | 1552.9008 | 0.9966454 | 0.00023312 | 8.87    | turquoise | 1051.87 | 1012.67 | 0.9997064 | 6.04E-06  | 7.064   | --    |
| AK233921.1 | PACSN2   | turquoise | 457.92 | 455.05054 | 0.7229528 | 0.16758596 | 24.126  | turquoise | 972.989 | 929.042 | 0.9794995 | 0.0035127 | 29.856  | 0     |
| AK233937.1 | VKORC1   | turquoise | 440.42 | 432.17219 | 0.7072772 | 0.1815367  | 24.036  | turquoise | 202.864 | 152.905 | 0.5624395 | 0.323668  | 28.564  | --    |
| AK234108.1 | PFKL     | turquoise | 1393.1 | 1392.4345 | 0.9703834 | 0.00609114 | 38.71   | turquoise | 754.109 | 694.983 | 0.9090018 | 0.0324986 | 43.138  | 0     |

|                |           |           |        |           |           |            |         |           |         |         |           |           |         |       |
|----------------|-----------|-----------|--------|-----------|-----------|------------|---------|-----------|---------|---------|-----------|-----------|---------|-------|
| AK237173.1     | PSMA5     | turquoise | 133.77 | 115.38878 | 0.4236389 | 0.47720525 | 51.576  | turquoise | 1025.59 | 977.924 | 0.9923291 | 0.0008056 | 56.726  | --    |
| AK237286.1     | RALB      | turquoise | 99.539 | 34.729103 | 0.1016    | 0.8708618  | 83.954  | turquoise | 145.815 | 120.393 | 0.5179051 | 0.3713787 | 85.946  | 0     |
| AK237308.1     | ATP6AP1   | turquoise | 858.49 | 854.21702 | 0.8573865 | 0.06324978 | 17.792  | turquoise | 304.81  | 259.142 | 0.6765508 | 0.2097779 | 28.796  | --    |
| AK237326.1     | THOC4     | turquoise | 1355.5 | 1354.4502 | 0.9680132 | 0.00683431 | 57.284  | turquoise | 680.621 | 569.393 | 0.8606776 | 0.0611047 | 53.188  | --    |
| NM_214281.2    | CFH       | turquoise | 1484.7 | 1484.2983 | 0.984849  | 0.0022336  | 6.718   | turquoise | 622.584 | 578.125 | 0.8758545 | 0.0515197 | 19.628  | 0.242 |
| NM_001097419.1 | PPPDE1    | turquoise | 1436   | 1435.2819 | 0.9804872 | 0.00326242 | 46.312  | turquoise | 288.048 | 243.485 | 0.6702494 | 0.2157093 | 51.11   | 0     |
| NM_001097439.1 | CPE       | turquoise | 1133.9 | 1131.8379 | 0.9245023 | 0.02461808 | 105.792 | turquoise | 962.086 | 901.172 | 0.9711807 | 0.0058475 | 124.864 | 0     |
| NM_001097447.1 | UIMC1     | turquoise | 1546.7 | 1546.2038 | 0.9970066 | 0.00019651 | 22.466  | turquoise | 750.961 | 671.777 | 0.9027492 | 0.0358703 | 21.956  | 99    |
| NM_001099925.1 | CARTPT    | turquoise | 1553.6 | 1553.1829 | 0.9965278 | 0.00024548 | 0.378   | turquoise | 1015.27 | 988.541 | 0.9929221 | 0.0007141 | 1.828   | 0     |
| NM_001101026.1 | SQLE      | turquoise | 1174   | 1172.1231 | 0.9328377 | 0.02068227 | 17.82   | turquoise | 1015.27 | 988.541 | 0.9929221 | 0.0007141 | 1.15    | 0.061 |
| NM_001101031.1 | BMP4      | turquoise | 1458.1 | 1457.5327 | 0.9844175 | 0.00232954 | 13.62   | turquoise | 985.935 | 954.122 | 0.9861006 | 0.001963  | 17.662  | 0     |
| NM_001101827.1 | MKI67IP   | turquoise | 224.13 | 184.18101 | 0.4586609 | 0.43719064 | 49.846  | turquoise | 961.876 | 885.471 | 0.9675485 | 0.0069833 | 55.384  | 0     |
| NM_001105292.1 | TBK1      | turquoise | 1472.8 | 1472.1793 | 0.9835534 | 0.00252565 | 9.4     | turquoise | 172.422 | 96.0425 | 0.4666074 | 0.4282207 | 23.182  | --    |
| NM_001105302.1 | ACLY      | turquoise | 1477.2 | 1476.6443 | 0.9868177 | 0.00181327 | 24.644  | turquoise | 993.612 | 926.338 | 0.9786686 | 0.0037279 | 30.746  | 0     |
| NM_001099936.1 | BTG1      | turquoise | 165.81 | 151.63093 | 0.4986681 | 0.39247151 | 83.53   | turquoise | 311.374 | 210.147 | 0.621995  | 0.2625885 | 102.806 | 99    |
| L10363.1       | IBSP      | turquoise | 1553.6 | 1553.1829 | 0.9965278 | 0.00024548 | 8.314   | turquoise | 1015.27 | 988.541 | 0.9929221 | 0.0007141 | 1.082   | --    |
| NM_001113701.1 | C20orf108 | turquoise | 363.68 | 352.65358 | 0.6643814 | 0.22127376 | 8.304   | turquoise | 1023.16 | 993.479 | 0.9945116 | 0.0004877 | 9.342   | 99    |
| NM_001114275.1 | NCOA2     | turquoise | 1514.3 | 1513.7822 | 0.9925616 | 0.00076926 | 18.392  | turquoise | 549.083 | 502.386 | 0.8424146 | 0.0732936 | 33.164  | 0.097 |
| NM_001114670.1 | TYK2      | turquoise | 1153.7 | 1152.4189 | 0.9216282 | 0.0260256  | 78.072  | turquoise | 591.306 | 544.037 | 0.8609427 | 0.0609329 | 74.032  | 0     |
| NM_001114672.1 | ATP9A     | turquoise | 376.91 | 371.34197 | 0.665921  | 0.21981004 | 34.362  | turquoise | 749.882 | 730.354 | 0.9177846 | 0.0279469 | 48.93   | 0.017 |
| NM_001122990.1 | NNAT      | turquoise | 251.45 | 229.48779 | 0.5369706 | 0.35075554 | 36.442  | turquoise | 1032.25 | 998.381 | 0.9957373 | 0.0003339 | 38.594  | --    |
| NM_001123131.1 | ITM2C     | turquoise | 1473.2 | 1472.6358 | 0.9851082 | 0.00217663 | 10.508  | turquoise | 617.534 | 464.867 | 0.8162835 | 0.0918778 | 14.126  | 0     |
| NM_001123111.1 | EGFL8     | turquoise | 1024.2 | 1022.3959 | 0.8997149 | 0.03754441 | 3.882   | turquoise | 1013.61 | 981.558 | 0.9921251 | 0.0008379 | 6.146   | --    |
| NM_001123177.1 | RAB33A    | turquoise | 1507.5 | 1507.0298 | 0.9896981 | 0.00125324 | 1.04    | turquoise | 1015.27 | 988.541 | 0.9929221 | 0.0007141 | 2.03    | --    |
| NM_001123160.1 | PFDN4     | turquoise | 171.26 | 151.64247 | 0.4598123 | 0.43588828 | 53.418  | turquoise | 1047.87 | 998.044 | 0.9966684 | 0.0002307 | 45.34   | 0     |
| NM_001123157.1 | PBX2      | turquoise | 1237.2 | 1236.105  | 0.9474693 | 0.01433843 | 82.412  | turquoise | 789.103 | 775.174 | 0.9328693 | 0.0206677 | 79.262  | 99    |
| NM_001123200.1 | TES       | turquoise | 1498.4 | 1497.8077 | 0.9891921 | 0.00134661 | 17.032  | turquoise | 785.734 | 717.867 | 0.9156895 | 0.0290126 | 27.538  | 0     |
| NM_001123096.1 | CDC37     | turquoise | 1298.1 | 1297.2717 | 0.9576152 | 0.01040802 | 33.866  | turquoise | 433.836 | 390.133 | 0.76833   | 0.1291038 | 35.644  | 99    |
| NM_001123090.1 | C6orf153  | turquoise | 1486.3 | 1485.7934 | 0.9868531 | 0.00180597 | 49.468  | turquoise | 665.774 | 583.843 | 0.8744999 | 0.0523541 | 47.4    | --    |
| EU780792.1     | CHD3      | turquoise | 1553.7 | 1553.3073 | 0.9967278 | 0.00022458 | 8.348   | turquoise | 889.834 | 870.37  | 0.9610214 | 0.0091837 | 11.232  | --    |
| NM_001128462.1 | RAI14     | turquoise | 1513.6 | 1513.202  | 0.9907331 | 0.00106938 | 16.89   | turquoise | 969.623 | 922.658 | 0.9777094 | 0.0039816 | 21.844  | 0.614 |
| NM_001129967.1 | LEF1      | turquoise | 1056.1 | 1054.7551 | 0.9058205 | 0.03420077 | 2.908   | turquoise | 1019.79 | 984.416 | 0.9927553 | 0.0007394 | 3.504   | 0     |
| XM_001927265.1 | AKAP12    | turquoise | 1537.4 | 1536.983  | 0.9957973 | 0.00032685 | 66.866  | turquoise | 882.447 | 800.87  | 0.9433006 | 0.0160684 | 130.97  | 0.418 |
| XM_001924731.1 | MTHFD1L   | turquoise | 1522.3 | 1521.8852 | 0.9928212 | 0.00072937 | 5.918   | turquoise | 581.868 | 421.988 | 0.7921776 | 0.1101154 | 10.83   | 0.214 |
| XM_001927696.1 | PDCL      | turquoise | 1483.4 | 1482.7774 | 0.9885469 | 0.00146883 | 26.01   | turquoise | 1014.14 | 949.788 | 0.9851482 | 0.0021679 | 31.658  | 0     |
| XM_001927813.1 | PBX3      | turquoise | 1518.2 | 1517.804  | 0.9923476 | 0.00080266 | 7.738   | turquoise | 979.703 | 943.89  | 0.9820609 | 0.0028765 | 19.946  | 0     |

|                |           |           |        |           |           |            |        |           |         |         |           |           |         |       |
|----------------|-----------|-----------|--------|-----------|-----------|------------|--------|-----------|---------|---------|-----------|-----------|---------|-------|
| XM_001925557.1 | GARNL3    | turquoise | 61.987 | 45.670377 | 0.2741926 | 0.6553123  | 3.528  | turquoise | 991.732 | 967.981 | 0.9874961 | 0.0016753 | 4.882   | --    |
| XM_001924714.1 | FAM129B   | turquoise | 1514.6 | 1514.1128 | 0.9919819 | 0.00086082 | 26.79  | turquoise | 816.591 | 783.67  | 0.9364892 | 0.0190294 | 19.612  | 0     |
| XM_001924823.1 | STXBP1    | turquoise | 1000.3 | 998.23612 | 0.8913331 | 0.04229324 | 5.836  | turquoise | 931.335 | 900.002 | 0.971405  | 0.0057796 | 8.554   | 0.047 |
| XM_001924991.1 | NIPSNAP2  | turquoise | 1415.3 | 1414.5618 | 0.9775108 | 0.00403481 | 39.49  | turquoise | 570.076 | 423.668 | 0.7895125 | 0.1121921 | 39.032  | 0.358 |
| XM_001924394.1 | IKBKAP    | turquoise | 1420   | 1419.4727 | 0.9775455 | 0.00402552 | 4.916  | turquoise | 237.101 | 152.595 | 0.5656496 | 0.320293  | 11.928  | 0.344 |
| XM_001926189.1 | ZNF618    | turquoise | 1426.5 | 1425.8833 | 0.9775157 | 0.0040335  | 11.414 | turquoise | 986.648 | 910.892 | 0.9747889 | 0.0047871 | 17.652  | 0.085 |
| AK232748       | AMBP      | turquoise | 1553.6 | 1553.1829 | 0.9965278 | 0.00024548 | 1.558  | turquoise | 1015.27 | 988.541 | 0.9929221 | 0.0007141 | 0.406   | --    |
| XM_001924352.1 | IGFBPL1   | turquoise | 1516.7 | 1516.3448 | 0.9909222 | 0.00103685 | 1.288  | turquoise | 1015.27 | 988.541 | 0.9929221 | 0.0007141 | 3.654   | 0.353 |
| XM_001928221.1 | RP11-35N1 | turquoise | 939.66 | 938.23388 | 0.889842  | 0.04315673 | 1.686  | turquoise | 1026.36 | 997.169 | 0.9953549 | 0.0003798 | 2.048   | 0     |
| XM_001927070.1 | SLC1A1    | turquoise | 844.67 | 839.69037 | 0.8510372 | 0.06745287 | 2.956  | turquoise | 1033.34 | 973.225 | 0.9905238 | 0.0011058 | 4.42    | 0     |
| XM_001924292.1 | KANK1     | turquoise | 811.09 | 808.84465 | 0.8379456 | 0.07637937 | 11.722 | turquoise | 758.314 | 733.781 | 0.9252726 | 0.0242452 | 9.586   | 0     |
| XM_001924582.1 | ELAVL2    | turquoise | 1553.6 | 1553.1829 | 0.9965278 | 0.00024548 | 2.786  | turquoise | 1015.27 | 988.541 | 0.9929221 | 0.0007141 | 10.962  | 0     |
| XM_001925498.1 | ATL1      | turquoise | 1468.4 | 1467.7122 | 0.9852906 | 0.00213681 | 2.852  | turquoise | 951.167 | 926.731 | 0.9776598 | 0.0039949 | 3.85    | 99    |
| XM_001924194.1 | WDHD1     | turquoise | 1267.9 | 1266.8757 | 0.9465366 | 0.01471992 | 11.724 | turquoise | 876.69  | 784.228 | 0.939892  | 0.0175298 | 14.144  | 0.957 |
| XM_001925911.1 | SCG3      | turquoise | 1556.4 | 1556.0725 | 0.9967712 | 0.00022013 | 3.202  | turquoise | 1022.04 | 993.969 | 0.99444   | 0.0004973 | 7.748   | 0.156 |
| XM_001924603.1 | DMXL2     | turquoise | 1443.6 | 1443.0915 | 0.979606  | 0.00348542 | 2.372  | turquoise | 1010.59 | 983.499 | 0.9917141 | 0.0009043 | 6.584   | 99    |
| XM_001927452.1 | SORD      | turquoise | 451.38 | 441.17458 | 0.7032013 | 0.18521597 | 7.334  | turquoise | 1004.76 | 974.677 | 0.9896374 | 0.0012643 | 10.48   | 99    |
| XM_001928118.1 | MFAP1     | turquoise | 1508.1 | 1507.6777 | 0.9890358 | 0.00137588 | 28.392 | turquoise | 795.45  | 685.277 | 0.9081329 | 0.0329608 | 35.614  | --    |
| XM_001925969.1 | MAP1A     | turquoise | 173.86 | 154.40787 | 0.4748795 | 0.41892832 | 23.066 | turquoise | 858.271 | 841.911 | 0.952762  | 0.0122369 | 19.946  | --    |
| XM_001929418.1 | FAM82A2   | turquoise | 1430.5 | 1429.8191 | 0.9786211 | 0.00374037 | 14.156 | turquoise | 907.738 | 824.884 | 0.950512  | 0.0131169 | 13.922  | 0.421 |
| XM_001927442.1 | THBS1     | turquoise | 1459.3 | 1458.6259 | 0.9840231 | 0.00241841 | 63.162 | turquoise | 864.153 | 814.4   | 0.9467927 | 0.0146148 | 73.574  | 0     |
| XM_001928355.1 | MEX3C     | turquoise | 1532.4 | 1531.9482 | 0.9932049 | 0.00067171 | 17.406 | turquoise | 903.041 | 866.712 | 0.9643834 | 0.0080256 | 29.998  | 0     |
| XM_001927251.1 | HERC1     | turquoise | 1450.6 | 1450.0349 | 0.9782253 | 0.00384448 | 59.61  | turquoise | 824.774 | 784.597 | 0.9372017 | 0.0187121 | 57.34   | 0.03  |
| XM_001924962.1 | TUBE1     | turquoise | 1410.1 | 1409.236  | 0.9767773 | 0.00423335 | 25.788 | turquoise | 651.773 | 524.753 | 0.8455633 | 0.0711433 | 25.03   | 99    |
| XM_001925318.1 | HDAC2     | turquoise | 1191.9 | 1190.217  | 0.9363808 | 0.01907778 | 112.7  | turquoise | 719.833 | 630.835 | 0.8850263 | 0.0459829 | 146.236 | 99    |
| XM_001927441.1 | TPBG      | turquoise | 1555.1 | 1554.6487 | 0.9977398 | 0.00012895 | 48.55  | turquoise | 909.514 | 841.969 | 0.9547948 | 0.0114591 | 55.388  | 0     |
| XM_001925769.1 | ELOVL4    | turquoise | 1297.9 | 1297.1925 | 0.949852  | 0.0133789  | 1.712  | turquoise | 992.811 | 968.208 | 0.9877362 | 0.0016273 | 3.296   | 0     |
| XM_001926931.1 | MOXD1     | turquoise | 1516.8 | 1516.2506 | 0.9919266 | 0.00086975 | 4.766  | turquoise | 985.985 | 951.766 | 0.9854927 | 0.002093  | 7.038   | 0.132 |
| XM_001925476.1 | ENPP1     | turquoise | 1534.1 | 1533.7041 | 0.9932252 | 0.00066872 | 22.126 | turquoise | 459.193 | 423.661 | 0.7899719 | 0.1118334 | 17.888  | 0.783 |
| XM_001926912.1 | HEY2      | turquoise | 1282.3 | 1281.4853 | 0.9470005 | 0.01452976 | 6.586  | turquoise | 815.858 | 801.339 | 0.941385  | 0.0168846 | 9.708   | 99    |
| XM_001924744.1 | ZNF34     | turquoise | 1484.9 | 1484.4522 | 0.9837944 | 0.00247044 | 6.326  | turquoise | 739.507 | 672.643 | 0.905031  | 0.0346275 | 10.964  | 99    |
| XM_001924535.1 | ASAP1     | turquoise | 1355.2 | 1354.1407 | 0.966234  | 0.00741039 | 32.684 | turquoise | 871.839 | 801.557 | 0.9437213 | 0.0158909 | 27.314  | 0     |
| XM_001928185.1 | FAM84B    | turquoise | 123.35 | 93.895763 | 0.3501165 | 0.56350051 | 4.064  | turquoise | 942.063 | 921.54  | 0.9751658 | 0.0046804 | 6.774   | 0     |
| XM_001924955.1 | KIAA0196  | turquoise | 1075.2 | 1073.0725 | 0.9144404 | 0.02965401 | 35.426 | turquoise | 867.875 | 810.627 | 0.9465137 | 0.0147293 | 40.308  | 0     |
| XM_001928505.1 | WDYHV1    | turquoise | 1476.3 | 1475.7085 | 0.9875457 | 0.00166532 | 78.814 | turquoise | 311.076 | 209.011 | 0.6246541 | 0.259941  | 86.834  | 0.077 |
| XM_001927135.1 | ZNF644    | turquoise | 1567.1 | 1566.6938 | 0.9994958 | 1.36E-05   | 53.61  | turquoise | 1035.58 | 997.515 | 0.9957194 | 0.000336  | 68.604  | --    |

|                |         |           |        |           |           |            |         |           |         |         |           |           |         |       |
|----------------|---------|-----------|--------|-----------|-----------|------------|---------|-----------|---------|---------|-----------|-----------|---------|-------|
| XM_001928869.1 | PEX19   | turquoise | 1343.5 | 1342.8238 | 0.9600765 | 0.00951828 | 55.688  | turquoise | 233.127 | 153.711 | 0.5627361 | 0.3233558 | 83.506  | 0.177 |
| XM_001929031.1 | ATP1A2  | turquoise | 403    | 395.54918 | 0.6712493 | 0.21476503 | 3.046   | turquoise | 538.532 | 508.192 | 0.8310547 | 0.0812137 | 11.414  | 0     |
| XM_001929177.1 | CADM3   | turquoise | 1490.6 | 1490.2361 | 0.9864308 | 0.00189357 | 1.636   | turquoise | 1020.35 | 992.764 | 0.9940676 | 0.000548  | 7.132   | 0     |
| XM_001925466.1 |         | turquoise | 298.34 | 277.52662 | 0.5787748 | 0.30658801 | 105.11  | turquoise | 752.459 | 674.748 | 0.9020129 | 0.0362743 | 60.794  | 99    |
| XM_001926377.1 | CCT3    | turquoise | 208.57 | 150.90591 | 0.3882789 | 0.51834711 | 133.048 | turquoise | 741.886 | 635.235 | 0.8906883 | 0.042666  | 103.6   | 0.134 |
| XM_001929400.1 | SHC1    | turquoise | 1356.3 | 1355.7663 | 0.9657168 | 0.00758072 | 21.056  | turquoise | 935.281 | 877.784 | 0.9662659 | 0.0073999 | 16.186  | 0     |
| XM_001929662.1 | MLLT11  | turquoise | 1258.5 | 1257.1638 | 0.949181  | 0.01364691 | 3.964   | turquoise | 1050.2  | 1010.34 | 0.9990896 | 3.30E-05  | 10.146  | --    |
| XM_001928686.1 | SEC22B  | turquoise | 1428.4 | 1427.8484 | 0.9793587 | 0.00354887 | 28.404  | turquoise | 868.796 | 753.885 | 0.9285032 | 0.0227013 | 44.686  | 0     |
| XM_001925127.1 | MAGI3   | turquoise | 1560.4 | 1560.0183 | 0.9981706 | 9.39E-05   | 41.262  | turquoise | 880.893 | 791.781 | 0.9408456 | 0.0171168 | 64.414  | 0.086 |
| XM_001928463.1 | TOX     | turquoise | 420.08 | 411.34812 | 0.6961579 | 0.19162312 | 13.646  | turquoise | 951.907 | 908.575 | 0.9727738 | 0.0053707 | 11.616  | 99    |
| XM_001927760.1 | KIFAP3  | turquoise | 1112   | 1110.3469 | 0.9192136 | 0.02722747 | 21.606  | turquoise | 1001.13 | 970.245 | 0.9889845 | 0.0013855 | 36.332  | 0     |
| XM_001927877.1 | KLHDC9  | turquoise | 333.74 | 329.42253 | 0.6743873 | 0.21180921 | 2.126   | turquoise | 1048.57 | 1010.85 | 0.9991494 | 2.98E-05  | 3.626   | 99    |
| XM_001927747.1 | PABPC1  | turquoise | 901.24 | 897.09321 | 0.8678202 | 0.05652983 | 438.702 | turquoise | 883.251 | 848.074 | 0.9577804 | 0.0103475 | 562.674 | 99    |
| XM_001928953.1 | HRSP12  | turquoise | 1553.3 | 1552.857  | 0.9970309 | 0.00019413 | 15.404  | turquoise | 867.544 | 807.55  | 0.9440419 | 0.0157561 | 24.838  | --    |
| XM_001928669.1 | 3-Sep   | turquoise | 872.46 | 867.67893 | 0.8587147 | 0.06238132 | 1.148   | turquoise | 1038.17 | 1006.29 | 0.9976827 | 0.0001339 | 9.404   | 0     |
| XM_001925128.1 | HOXC4   | turquoise | 1374.1 | 1373.216  | 0.9704905 | 0.00605821 | 28.926  | turquoise | 1018.45 | 975.912 | 0.9907682 | 0.0010633 | 25.518  | --    |
| XM_001927351.1 | EPYC    | turquoise | 1552.3 | 1551.917  | 0.9963903 | 0.0002602  | 20.116  | turquoise | 1015.27 | 988.541 | 0.9929221 | 0.0007141 | 2.64    | 0.144 |
| XM_001927280.1 | CSRP2   | turquoise | 320.4  | 291.5672  | 0.5789769 | 0.30637817 | 34.562  | turquoise | 1051.18 | 1006.77 | 0.9983712 | 7.89E-05  | 40.156  | 0     |
| XM_001926886.1 | PTPRR   | turquoise | 1542.6 | 1542.1788 | 0.994826  | 0.00044642 | 2.518   | turquoise | 957.389 | 931.719 | 0.979491  | 0.0035149 | 4.076   | 0     |
| XM_001927835.1 | RIMKLB  | turquoise | 1560.7 | 1560.2316 | 0.998822  | 4.85E-05   | 13.228  | turquoise | 921.299 | 824.6   | 0.9502334 | 0.0132273 | 18.744  | 99    |
| XM_001928013.1 | MLF2    | turquoise | 1442.9 | 1442.1254 | 0.9822273 | 0.00283663 | 88.838  | turquoise | 742.305 | 598.323 | 0.8727932 | 0.0534114 | 104.92  | 0     |
| XM_001924188.1 | CNTN1   | turquoise | 1447.1 | 1446.4002 | 0.9809466 | 0.0031481  | 3.072   | turquoise | 1030.72 | 1000.11 | 0.9960333 | 0.0002997 | 11.378  | 0     |
| XM_001927045.1 | FOXF2   | turquoise | 1553.6 | 1553.1829 | 0.9965278 | 0.00024548 | 0.756   | turquoise | 1015.27 | 988.541 | 0.9929221 | 0.0007141 | 4.33    | --    |
| XM_001928655.1 | CD83    | turquoise | 1482.6 | 1482.0975 | 0.9876326 | 0.00164795 | 8.358   | turquoise | 804.067 | 746.397 | 0.92642   | 0.0236931 | 14.36   | 0     |
| XM_001927909.1 | DEK     | turquoise | 1354.8 | 1353.9804 | 0.966406  | 0.00735403 | 266.846 | turquoise | 473.505 | 385.056 | 0.7644632 | 0.1322664 | 285.724 | 0     |
| XM_001927641.1 | FLRT2   | turquoise | 1481   | 1480.6285 | 0.9835265 | 0.00253185 | 11.734  | turquoise | 126.84  | 78.6152 | 0.4089367 | 0.4942253 | 14.182  | 0     |
| XM_001928187.1 | CALM1   | turquoise | 1517.2 | 1516.8242 | 0.9907424 | 0.00106777 | 90.006  | turquoise | 999.604 | 934.581 | 0.9805566 | 0.0032451 | 125.396 | 99    |
| XM_001926890.1 | CPSF2   | turquoise | 1390.1 | 1389.1959 | 0.9721007 | 0.00557054 | 40.91   | turquoise | 699.461 | 624.13  | 0.889166  | 0.04355   | 51.154  | 0     |
| XM_001926793.1 | PLEKHG3 | turquoise | 465.88 | 457.53178 | 0.7211427 | 0.16918048 | 46.082  | turquoise | 322.325 | 282.047 | 0.6914668 | 0.1959246 | 28.57   | 0.042 |
| XM_001928679.1 | ARG2    | turquoise | 1413.7 | 1412.9821 | 0.9769889 | 0.00417575 | 7.408   | turquoise | 896.7   | 874.608 | 0.9624634 | 0.0086807 | 11.58   | 0     |
| XM_001928767.1 | RDH11   | turquoise | 672.54 | 666.13606 | 0.79893   | 0.10490641 | 26.262  | turquoise | 1029.27 | 968.819 | 0.9893759 | 0.0013124 | 45.028  | 0.154 |
| XM_001928961.1 | PNMA1   | turquoise | 1069.9 | 1068.3022 | 0.9164634 | 0.02861747 | 8.702   | turquoise | 1050.66 | 1011.6  | 0.9993118 | 2.17E-05  | 14.154  | 99    |
| XM_001928512.1 | LOXL1   | turquoise | 1452.9 | 1452.3139 | 0.9831221 | 0.00262548 | 27.482  | turquoise | 747.525 | 622.769 | 0.8828523 | 0.0472772 | 24.29   | 99    |
| XM_001926092.1 | NEO1    | turquoise | 1376.3 | 1375.7236 | 0.9657354 | 0.00757456 | 42.136  | turquoise | 580.44  | 558.909 | 0.8551065 | 0.0647494 | 47.672  | 99    |
| XM_001924413.1 | NOVA1   | turquoise | 142.42 | 120.16785 | 0.407708  | 0.49565345 | 11.748  | turquoise | 1028.54 | 998.245 | 0.9955336 | 0.0003581 | 27.472  | --    |
| XM_001927354.1 | NFATC4  | turquoise | 1483.3 | 1482.6693 | 0.9881495 | 0.00154585 | 22.394  | turquoise | 969.623 | 920.841 | 0.9775283 | 0.0040301 | 20.368  | 99    |

|                |          |           |        |           |           |            |        |           |         |         |           |           |         |       |
|----------------|----------|-----------|--------|-----------|-----------|------------|--------|-----------|---------|---------|-----------|-----------|---------|-------|
| XM_001928918.1 | SLC22A17 | turquoise | 1461.6 | 1460.8548 | 0.9841001 | 0.00240097 | 18.144 | turquoise | 1017.38 | 977.04  | 0.9911576 | 0.0009968 | 19.628  | 0     |
| XM_001925226.1 | ADAMTS   | turquoise | 1156.5 | 1154.7303 | 0.9307174 | 0.02166229 | 22.902 | turquoise | 844.792 | 817.8   | 0.9516137 | 0.0126835 | 16.532  | 0.105 |
| XM_001929079.1 | SH3GL3   | turquoise | 692.7  | 684.85372 | 0.8001877 | 0.10394468 | 12.566 | turquoise | 715.949 | 584.965 | 0.8676011 | 0.0566685 | 13.998  | 0     |
| XM_001929124.1 | HDBGFRP3 | turquoise | 1263.5 | 1262.3235 | 0.9492375 | 0.01362426 | 32.994 | turquoise | 963.862 | 931.58  | 0.9797669 | 0.0034443 | 29.388  | 99    |
| XM_001925448.1 | SOX4     | turquoise | 1249.2 | 1248.657  | 0.9497745 | 0.01340975 | 54.768 | turquoise | 1031.91 | 997.356 | 0.9958074 | 0.0003257 | 71.254  | 0     |
| XM_001927905.1 | NRSN1    | turquoise | 1513.8 | 1513.2691 | 0.9894726 | 0.00129457 | 1.086  | turquoise | 793.225 | 769.814 | 0.9310866 | 0.0214906 | 5.314   | 0.395 |
| XM_001929121.1 |          | turquoise | 1553.6 | 1553.1829 | 0.9965278 | 0.00024548 | 0.566  | turquoise | 1037.88 | 1002.84 | 0.9972042 | 0.0001774 | 3.008   | 99    |
| XM_001929612.1 | RING1    | turquoise | 248.85 | 230.73698 | 0.5514799 | 0.33525736 | 20.88  | turquoise | 684.363 | 648.062 | 0.8900371 | 0.0430434 | 14.616  | 0     |
| XM_001927693.1 | RGL2     | turquoise | 195.33 | 185.58593 | 0.5542764 | 0.33229044 | 34.68  | turquoise | 783.276 | 768.44  | 0.9309113 | 0.0215721 | 38.11   | 0.617 |
| XM_001928400.1 | HMGA1    | turquoise | 501.15 | 494.90917 | 0.7432633 | 0.14999956 | 39.014 | turquoise | 1020.72 | 960.257 | 0.9873424 | 0.0017062 | 32.332  | 99    |
| XM_001926869.1 | SCUBE3   | turquoise | 1553.6 | 1553.1829 | 0.9965278 | 0.00024548 | 2.362  | turquoise | 1015.27 | 988.541 | 0.9929221 | 0.0007141 | 0.204   | --    |
| XM_001929580.1 | MTCH1    | turquoise | 1276.3 | 1274.9854 | 0.9517924 | 0.01261368 | 168.67 | turquoise | 1046.89 | 1001.61 | 0.9972324 | 0.0001747 | 198.746 | 99    |
| XM_001927223.1 | PAN3     | turquoise | 124.83 | 99.019573 | 0.3730146 | 0.53631897 | 62.712 | turquoise | 448.285 | 415.096 | 0.7830076 | 0.1173097 | 61.818  | 0     |
| XM_001928150.1 | TRIM13   | turquoise | 180.6  | 156.44046 | 0.4551623 | 0.44115299 | 29.566 | turquoise | 1006.57 | 951.219 | 0.9851982 | 0.002157  | 27.632  | --    |
| XM_001927466.1 | DZIP1    | turquoise | 1546   | 1545.5319 | 0.9962813 | 0.00027207 | 68.772 | turquoise | 721.876 | 574.127 | 0.8627104 | 0.0597914 | 92.484  | 0.178 |
| XM_001926132.1 | CLN5     | turquoise | 1293.3 | 1292.0313 | 0.9560972 | 0.01096962 | 22.546 | turquoise | 844.201 | 803.419 | 0.9489867 | 0.0137249 | 23.604  | 99    |
| XM_001926443.1 | COL8A1   | turquoise | 1552.9 | 1552.5135 | 0.9964263 | 0.00025631 | 20.412 | turquoise | 977.97  | 899.494 | 0.9714472 | 0.0057668 | 15.964  | 0     |
| XM_001924920.1 | HSPA13   | turquoise | 1244.4 | 1243.0768 | 0.9485344 | 0.01390683 | 26.612 | turquoise | 996.764 | 937.627 | 0.9810016 | 0.0031345 | 50.476  | 0     |
| XM_001925741.1 | TMEM44   | turquoise | 364.4  | 347.43721 | 0.643294  | 0.24158777 | 59.64  | turquoise | 977.869 | 928.521 | 0.9783845 | 0.0038025 | 42.558  | 0     |
| XM_001928236.1 | LSG1     | turquoise | 1210.9 | 1210.1875 | 0.9389474 | 0.01794208 | 9.588  | turquoise | 501.871 | 440.885 | 0.7991823 | 0.1047132 | 29.39   | 0.727 |
| XM_001925819.1 | TMEM44   | turquoise | 1262.8 | 1262.2244 | 0.9455358 | 0.01513285 | 59.44  | turquoise | 483.372 | 405.99  | 0.7910627 | 0.1109827 | 58.11   | --    |
| XM_001928989.1 | ITGB5    | turquoise | 1384.3 | 1383.4047 | 0.9713739 | 0.00578899 | 45.538 | turquoise | 989.133 | 918.603 | 0.9771823 | 0.0041233 | 40.422  | --    |
| XM_001925354.1 | NISCH    | turquoise | 1311.8 | 1310.6542 | 0.9600305 | 0.00953467 | 54.018 | turquoise | 544.276 | 516.028 | 0.84895   | 0.0688528 | 41.228  | 0.161 |
| XM_001927800.1 | SETD5    | turquoise | 449.51 | 433.08118 | 0.683567  | 0.20322844 | 39.422 | turquoise | 831.396 | 814.565 | 0.944451  | 0.0155846 | 45.904  | 0     |
| XM_001924481.1 | SEC61A1  | turquoise | 1481.5 | 1480.8726 | 0.9873937 | 0.00169587 | 40.798 | turquoise | 396.894 | 311.269 | 0.7162287 | 0.1735309 | 54.382  | 0     |
| XM_001929007.1 | CDC42BP  | turquoise | 1530.6 | 1530.0858 | 0.9947742 | 0.00045314 | 5.338  | turquoise | 1019.73 | 974.881 | 0.9909338 | 0.0010349 | 1.626   | 1.074 |
| XM_001926755.1 | XPO7     | turquoise | 1268   | 1266.7894 | 0.9477989 | 0.0142044  | 48.486 | turquoise | 248.832 | 192.443 | 0.6076033 | 0.2770401 | 52.394  | 0     |
| XM_001924700.1 | NEFL     | turquoise | 1560.1 | 1559.7568 | 0.9979207 | 0.00011378 | 20.418 | turquoise | 1034.89 | 1003.72 | 0.9969838 | 0.0001988 | 61.802  | 0     |
| XM_001927592.1 | BNIP3L   | turquoise | 1542   | 1541.5253 | 0.9964172 | 0.00025729 | 84.21  | turquoise | 853.085 | 735.999 | 0.9224282 | 0.0256313 | 114.108 | 99    |
| XM_001926955.1 | CALY     | turquoise | 1553.6 | 1553.1829 | 0.9965278 | 0.00024548 | 0.52   | turquoise | 1015.27 | 988.541 | 0.9929221 | 0.0007141 | 3.79    | 99    |
| XM_001927529.1 | ALDH18A  | turquoise | 1366.7 | 1365.9279 | 0.9688559 | 0.00656687 | 65.642 | turquoise | 285.231 | 237.148 | 0.6729051 | 0.213204  | 56.294  | 0     |
| XM_001928803.1 | EXOSC1   | turquoise | 1333.8 | 1333.215  | 0.9610534 | 0.00917244 | 21.236 | turquoise | 189.487 | 154.468 | 0.5961956 | 0.288639  | 27.29   | 0     |
| XM_001926725.1 | DPCD     | turquoise | 114.17 | 78.112205 | 0.2938854 | 0.63127183 | 10.51  | turquoise | 986.023 | 954.022 | 0.9851124 | 0.0021757 | 9.634   | 99    |
| XM_001925953.1 | PSD      | turquoise | 1559.3 | 1558.9086 | 0.9973212 | 0.00016636 | 2.112  | turquoise | 1031.2  | 1001.24 | 0.9963105 | 0.0002689 | 9.45    | 99    |
| XM_001928812.1 | CUEDC2   | turquoise | 912.01 | 909.03611 | 0.873349  | 0.05306639 | 53.46  | turquoise | 785.32  | 769.389 | 0.9305466 | 0.0217419 | 61.484  | 99    |
| XM_001929320.1 | INA      | turquoise | 1553.6 | 1553.1829 | 0.9965278 | 0.00024548 | 3.496  | turquoise | 1015.27 | 988.541 | 0.9929221 | 0.0007141 | 10.826  | 0     |

|                |          |           |        |           |           |            |         |           |         |         |           |           |         |       |
|----------------|----------|-----------|--------|-----------|-----------|------------|---------|-----------|---------|---------|-----------|-----------|---------|-------|
| XM_001925277.1 | MXI1     | turquoise | 907.95 | 906.23577 | 0.8667231 | 0.05722527 | 20.594  | turquoise | 346.516 | 325.221 | 0.7311085 | 0.1604562 | 26.854  | 99    |
| XM_001927456.1 | INPP5F   | turquoise | 1028.8 | 1026.8823 | 0.9020298 | 0.03626498 | 42.648  | turquoise | 1014.27 | 980.587 | 0.9918761 | 0.0008779 | 57.218  | 0.073 |
| XM_001928522.1 | CCAR1    | turquoise | 1402.8 | 1402.0092 | 0.9741438 | 0.00497151 | 65.996  | turquoise | 953.461 | 912.298 | 0.974454  | 0.0048825 | 90.556  | 99    |
| XM_001927977.1 | ATAD1    | turquoise | 95.118 | 52.83315  | 0.2169339 | 0.72597314 | 34.07   | turquoise | 108.973 | 80.5494 | 0.449232  | 0.4478876 | 42.646  | 0     |
| XM_001928136.1 |          | turquoise | 1435.3 | 1434.6287 | 0.9797521 | 0.00344811 | 49.604  | turquoise | 910.266 | 859.522 | 0.9600797 | 0.0095171 | 64.116  | 99    |
| XM_001928949.1 | MYST4    | turquoise | 1567   | 1566.5606 | 0.9995328 | 1.21E-05   | 24.544  | turquoise | 978.387 | 915.419 | 0.9767841 | 0.0042315 | 28.548  | 0.256 |
| XM_001929420.1 | ARPC3    | turquoise | 401.12 | 392.54673 | 0.6944421 | 0.1931932  | 39.98   | turquoise | 1019.58 | 973.74  | 0.9906638 | 0.0010814 | 36.58   | 0     |
| XM_001925272.1 | GCN1L1   | turquoise | 1391.6 | 1390.8045 | 0.9745649 | 0.00485087 | 25.352  | turquoise | 469.952 | 431.647 | 0.8073727 | 0.0985023 | 27.33   | 0     |
| XM_001928487.1 | COX6A1P  | turquoise | 1446.6 | 1445.8813 | 0.9807368 | 0.00320014 | 97.438  | turquoise | 573.219 | 452.303 | 0.8042953 | 0.1008224 | 133.566 | --    |
| XM_001925356.1 | RNF10    | turquoise | 1377.3 | 1376.7874 | 0.9710655 | 0.00588253 | 35.736  | turquoise | 953.142 | 886.491 | 0.9679782 | 0.0068455 | 46.92   | 0.43  |
| XM_001926685.1 | SART3    | turquoise | 1488   | 1487.4281 | 0.9874766 | 0.0016792  | 57.768  | turquoise | 472.296 | 325.822 | 0.727219  | 0.1638453 | 53.926  | 1.025 |
| XM_001928908.1 | NIPSNAP1 | turquoise | 877.25 | 876.09032 | 0.8629985 | 0.05960592 | 16.408  | turquoise | 980.961 | 955.022 | 0.9844188 | 0.0023293 | 16.446  | --    |
| XM_001926534.1 | PIK3IP1  | turquoise | 204.79 | 191.74949 | 0.516353  | 0.37307018 | 3.398   | turquoise | 588.182 | 563.077 | 0.854599  | 0.0650847 | 6.948   | 99    |
| XM_001928076.1 | YWHAH    | turquoise | 830.24 | 827.54639 | 0.8501091 | 0.06807426 | 101.718 | turquoise | 979.538 | 941.314 | 0.9812613 | 0.0030706 | 127.152 | 0     |
| XM_001927481.1 | HIRA     | turquoise | 1505.1 | 1504.5613 | 0.989318  | 0.00132317 | 19.184  | turquoise | 916.735 | 830.756 | 0.9536804 | 0.0118834 | 19.768  | 0.351 |
| XM_001926661.1 | FAM101A  | turquoise | 1548.6 | 1548.1891 | 0.996179  | 0.00028337 | 22.294  | turquoise | 1032.44 | 978.616 | 0.9916015 | 0.0009228 | 17.014  | 0     |
| XM_001928673.1 | IDH1     | turquoise | 1541.1 | 1540.607  | 0.9964437 | 0.00025445 | 5.398   | turquoise | 843.502 | 744.361 | 0.9255926 | 0.0240908 | 11.984  | --    |
| XM_001928206.1 | STK16    | turquoise | 1428.1 | 1427.4178 | 0.9792571 | 0.00357504 | 40.074  | turquoise | 711.073 | 591.983 | 0.8708875 | 0.0545999 | 40.812  | 0     |
| XM_001928489.1 | RESP18   | turquoise | 1553.6 | 1553.1829 | 0.9965278 | 0.00024548 | 0.236   | turquoise | 1015.27 | 988.541 | 0.9929221 | 0.0007141 | 2.91    | 0     |
| XM_001925017.1 | HOXD3    | turquoise | 749.53 | 745.68321 | 0.8266648 | 0.08434067 | 24.918  | turquoise | 405.966 | 390.418 | 0.7890772 | 0.1125325 | 20.802  | 0     |
| XM_001927705.1 | PRKRA    | turquoise | 185.2  | 118.72512 | 0.317258  | 0.6029371  | 24.388  | turquoise | 975.366 | 914.282 | 0.9750075 | 0.0047251 | 28.438  | 99    |
| XM_001925245.1 | FAM149A  | turquoise | 132.66 | 103.80267 | 0.3624367 | 0.54884342 | 15.082  | turquoise | 999.004 | 963.533 | 0.9877518 | 0.0016242 | 13.08   | 1.043 |
| XM_001924403.1 | MTMR7    | turquoise | 1530.3 | 1529.8112 | 0.9949078 | 0.00043587 | 2.32    | turquoise | 1018.87 | 990.529 | 0.9935485 | 0.0006214 | 4.262   | 0.118 |
| XM_001924460.1 | CNOT7    | turquoise | 1172.6 | 1171.0282 | 0.9307183 | 0.02166187 | 74.538  | turquoise | 517.989 | 470.929 | 0.8327745 | 0.0799986 | 76.66   | 0     |
| XM_001925000.1 | ISM1     | turquoise | 1537.8 | 1537.429  | 0.9932448 | 0.00066582 | 3.968   | turquoise | 981.059 | 946.016 | 0.9828658 | 0.0026854 | 4.336   | 0.068 |
| XM_001929295.1 | GGT7     | turquoise | 409.55 | 392.2548  | 0.6666461 | 0.21912157 | 5.54    | turquoise | 1052.59 | 1006.11 | 0.9984421 | 7.38E-05  | 6.63    | 0.164 |
| XM_001925248.1 | SAMHD1   | turquoise | 1548.3 | 1547.9255 | 0.9959623 | 0.0003078  | 21.818  | turquoise | 960.042 | 907.495 | 0.9737118 | 0.0050963 | 26.896  | 0     |
| XM_001928614.1 | SRC      | turquoise | 1528.9 | 1528.4623 | 0.9925541 | 0.00077042 | 16.428  | turquoise | 898.533 | 821.499 | 0.9495532 | 0.013498  | 23.13   | 0.119 |
| XM_001928737.1 | VSTM2L   | turquoise | 1553.6 | 1553.1829 | 0.9965278 | 0.00024548 | 2.598   | turquoise | 1015.27 | 988.541 | 0.9929221 | 0.0007141 | 5.482   | 99    |
| XM_001927204.1 | SULF2    | turquoise | 1434.9 | 1434.3825 | 0.9767059 | 0.00425283 | 38.918  | turquoise | 844.632 | 823.53  | 0.9474238 | 0.014357  | 27.36   | 0.216 |
| XM_001924191.1 | SYAP1    | turquoise | 64.889 | 51.523728 | 0.2782498 | 0.65034751 | 40.11   | turquoise | 1021.75 | 971.642 | 0.9900222 | 0.0011946 | 33.86   | 0     |
| XM_001927440.1 | SLC25A5  | turquoise | 1566.3 | 1565.9146 | 0.9992651 | 2.39E-05   | 24.44   | turquoise | 1023    | 959.837 | 0.9874482 | 0.0016849 | 32.732  | 0     |
| XM_001927589.1 | SLC25A43 | turquoise | 1511.3 | 1510.7872 | 0.9916915 | 0.00090797 | 11.198  | turquoise | 723.304 | 669.468 | 0.9067721 | 0.0336887 | 16.482  | 99    |
| XM_001927811.1 | NLGN3    | turquoise | 1467.2 | 1466.7177 | 0.9834781 | 0.00254298 | 5.184   | turquoise | 921.655 | 856.439 | 0.9606341 | 0.0093204 | 3.766   | 0     |
| XM_001924869.1 | TCEAL2   | turquoise | 1553.6 | 1553.1829 | 0.9965278 | 0.00024548 | 1.748   | turquoise | 1002.13 | 976.781 | 0.9898318 | 0.001229  | 6.338   | --    |
| XM_001925649.1 | BEX5     | turquoise | 1553.6 | 1553.1829 | 0.9965278 | 0.00024548 | 1.04    | turquoise | 1015.27 | 988.541 | 0.9929221 | 0.0007141 | 3.924   | 0.168 |

|                |          |           |        |           |           |            |         |           |         |         |           |           |         |       |
|----------------|----------|-----------|--------|-----------|-----------|------------|---------|-----------|---------|---------|-----------|-----------|---------|-------|
| NM_001130535.1 | 6-Mar    | turquoise | 315.19 | 305.19525 | 0.6377267 | 0.24703129 | 68.814  | turquoise | 234.623 | 211.3   | 0.6305118 | 0.2541344 | 107.038 | 0     |
| X17058.1       | SLC2A1   | turquoise | 1371.4 | 1370.5037 | 0.9695522 | 0.00634854 | 11.838  | turquoise | 819.002 | 699.089 | 0.9099229 | 0.032011  | 13.55   | 99    |
| NM_001131045.1 | SLC39A7  | turquoise | 1381.2 | 1380.3707 | 0.9722391 | 0.00552926 | 87.648  | turquoise | 661.25  | 595.637 | 0.8744664 | 0.0523748 | 87.352  | 0.334 |
| AF490841.1     | GLS      | turquoise | 139.83 | 107.0466  | 0.3960385 | 0.50925882 | 128.1   | turquoise | 889.917 | 816.979 | 0.9481868 | 0.0140472 | 124.256 | 99    |
| NM_001134967.1 | EPHA4    | turquoise | 1558.9 | 1558.4828 | 0.9975717 | 0.0001436  | 3.982   | turquoise | 951.771 | 912.093 | 0.9743203 | 0.0049208 | 4.648   | 0     |
| X16638.1       | PGD      | turquoise | 1468   | 1467.2829 | 0.9858668 | 0.00201267 | 35.81   | turquoise | 769.673 | 629.218 | 0.8844593 | 0.0463194 | 33.326  | 0     |
| NM_001135680.1 | USP7     | turquoise | 1435.4 | 1434.6101 | 0.979507  | 0.00351078 | 30.11   | turquoise | 339.52  | 322.751 | 0.7493724 | 0.1448224 | 51.706  | 0     |
| NM_001135966.1 | SLC26A11 | turquoise | 634.66 | 625.15082 | 0.7768822 | 0.12219068 | 7.194   | turquoise | 1030.47 | 995.738 | 0.9953811 | 0.0003766 | 9.786   | --    |
| NM_213921.1    | HEXB     | turquoise | 1428   | 1427.4119 | 0.9804825 | 0.00326358 | 16.674  | turquoise | 987.145 | 939.23  | 0.9823131 | 0.0028162 | 18.928  | 0     |
| NM_213911.1    | PGRMC1   | turquoise | 1566.9 | 1566.5565 | 0.9988895 | 4.44E-05   | 275.984 | turquoise | 1042.35 | 991.125 | 0.9950022 | 0.0004238 | 308.788 | 0     |
| NM_213971.1    | CLU      | turquoise | 1057   | 1055.7414 | 0.9012462 | 0.03669648 | 11.086  | turquoise | 985.965 | 961.215 | 0.9860428 | 0.0019752 | 44.516  | 0.031 |
| NM_213977.1    | SEPW1    | turquoise | 1563.8 | 1563.3529 | 0.9988861 | 4.46E-05   | 31.994  | turquoise | 594.367 | 516.229 | 0.8358008 | 0.0778742 | 49.154  | 99    |
| NM_214003.1    | IGFBP2   | turquoise | 591.58 | 581.41508 | 0.762656  | 0.13375228 | 142.956 | turquoise | 575.919 | 493.15  | 0.8255057 | 0.0851724 | 117.826 | --    |
| NM_214024.1    | PPP2R1A  | turquoise | 1163.9 | 1162.0729 | 0.9331799 | 0.02052546 | 78.79   | turquoise | 834.926 | 791.076 | 0.939511  | 0.0176957 | 100.862 | 0     |
| NM_214025.1    | PPP2R2B  | turquoise | 1175.8 | 1174.894  | 0.9356836 | 0.01939016 | 1.788   | turquoise | 945.41  | 920.382 | 0.9750406 | 0.0047158 | 5.054   | 0     |
| NM_214054.1    | PLAT     | turquoise | 1564.2 | 1563.756  | 0.9986215 | 6.14E-05   | 11.564  | turquoise | 1008.53 | 981.535 | 0.9913832 | 0.0009589 | 20.262  | 0.695 |
| NM_214064.1    | FMO1     | turquoise | 1039.9 | 1038.5749 | 0.8982559 | 0.03835804 | 2.84    | turquoise | 712.325 | 689.89  | 0.9054402 | 0.0344061 | 6.09    | 0.208 |
| NM_213866.1    | CEND1    | turquoise | 1553.6 | 1553.1829 | 0.9965278 | 0.00024548 | 0.33    | turquoise | 1031.01 | 1001.09 | 0.9962725 | 0.000273  | 2.378   | --    |
| NM_213815.1    | CD55     | turquoise | 1549.6 | 1549.2232 | 0.9959694 | 0.000307   | 17.088  | turquoise | 933.924 | 891.572 | 0.9702777 | 0.0061237 | 2.884   | 0.632 |
| NM_213781.1    | SCD      | turquoise | 694.28 | 689.17878 | 0.8109045 | 0.09585983 | 2.17    | turquoise | 999.968 | 974.983 | 0.9894327 | 0.0013019 | 4.018   | 0     |
| AY459532       | UCHL1    | turquoise | 1555.4 | 1555.0523 | 0.9971385 | 0.00018367 | 68.082  | turquoise | 1030.26 | 1000.57 | 0.9961237 | 0.0002895 | 152.592 | --    |
| NM_213746.1    | CALCB    | turquoise | 1532   | 1531.5603 | 0.9930566 | 0.0006938  | 3.89    | turquoise | 945.322 | 915.701 | 0.9740501 | 0.0049985 | 3.53    | 0     |
| NM_213741.1    | TRO      | turquoise | 1014.8 | 1011.6326 | 0.8962794 | 0.03946904 | 6.238   | turquoise | 1039.25 | 994.233 | 0.99549   | 0.0003633 | 8.126   | --    |
| NM_214230.1    | TNC      | turquoise | 1489.5 | 1488.8975 | 0.9882137 | 0.00153331 | 92.214  | turquoise | 897.618 | 804.045 | 0.9440691 | 0.0157447 | 47.94   | 0.155 |
| NM_214240.1    | ATP6V1H  | turquoise | 1363.7 | 1362.7978 | 0.965151  | 0.00776847 | 37.614  | turquoise | 1013.41 | 970.316 | 0.9894723 | 0.0012946 | 42.236  | 0.297 |
| NM_214267.1    | CYBA     | turquoise | 1521.6 | 1521.0727 | 0.9930794 | 0.0006904  | 19.348  | turquoise | 557.159 | 459.453 | 0.8098774 | 0.0966261 | 19.358  | --    |
| NM_214306.1    | HSD17B4  | turquoise | 1053.6 | 1052.2866 | 0.9124862 | 0.03066649 | 41.044  | turquoise | 865.929 | 832.124 | 0.9512331 | 0.0128327 | 49.454  | 0     |
| NM_214317.1    | AFP      | turquoise | 1553.6 | 1553.1829 | 0.9965278 | 0.00024548 | 7.086   | turquoise | 1015.27 | 988.541 | 0.9929221 | 0.0007141 | 0.474   | 99    |
| NM_214328.1    | GATA6    | turquoise | 158.56 | 136.75309 | 0.4345609 | 0.46464431 | 2.266   | turquoise | 917.231 | 899.209 | 0.9687918 | 0.0065871 | 8.388   | 0     |
| NM_214333.1    | RPN1     | turquoise | 321.9  | 316.9354  | 0.6570447 | 0.2282857  | 84.526  | turquoise | 1000.7  | 961.796 | 0.9873294 | 0.0017088 | 84.924  | 0.115 |
| NM_214337.1    | PPP1R14A | turquoise | 1092.7 | 1091.4766 | 0.9151378 | 0.02929535 | 3.96    | turquoise | 985.338 | 960.161 | 0.9857277 | 0.0020424 | 6.382   | --    |
| NM_214366.1    | PPP2CA   | turquoise | 426.71 | 408.33566 | 0.67008   | 0.21586935 | 98.04   | turquoise | 296.959 | 261.311 | 0.6879421 | 0.1991741 | 118.878 | 99    |
| NM_214372.1    | APP      | turquoise | 1549   | 1548.6535 | 0.9954519 | 0.00036795 | 241.998 | turquoise | 1009.14 | 978.306 | 0.9907429 | 0.0010677 | 427.722 | 0     |
| NM_214382.1    | PTH1R    | turquoise | 527.55 | 523.76589 | 0.7423418 | 0.1507851  | 61.498  | turquoise | 1044.73 | 992.96  | 0.9952497 | 0.0003927 | 38.16   | 0.14  |
| NM_214408.1    | PRDX6    | turquoise | 278.76 | 257.54061 | 0.5727676 | 0.3128415  | 81.484  | turquoise | 985.977 | 944.527 | 0.9823023 | 0.0028187 | 55.982  | 0     |
| NM_214432.1    | CYP51A1  | turquoise | 1326.7 | 1325.5651 | 0.9622763 | 0.00874546 | 22.266  | turquoise | 767.366 | 722.36  | 0.9180111 | 0.0278325 | 35.1    | 0     |



|                |          |           |        |           |           |            |         |           |         |         |           |           |         |       |
|----------------|----------|-----------|--------|-----------|-----------|------------|---------|-----------|---------|---------|-----------|-----------|---------|-------|
| NM_214440.1    | HYAL2    | turquoise | 1486.5 | 1485.9519 | 0.9871454 | 0.00174616 | 10.862  | turquoise | 941.436 | 920.28  | 0.9754519 | 0.0046    | 17.064  | 0     |
| NM_213742.1    | CALCB    | turquoise | 1263.8 | 1262.4168 | 0.9491665 | 0.01365273 | 1.576   | turquoise | 1040    | 1004.69 | 0.9977592 | 0.0001273 | 3.702   | --    |
| AY609441.1     | APOO     | turquoise | 817.48 | 813.83698 | 0.8448858 | 0.07160431 | 17.476  | turquoise | 592.641 | 537.016 | 0.8484289 | 0.0692037 | 17.36   | 99    |
| AY609490.1     | CLDN11   | turquoise | 1503.5 | 1503.1447 | 0.9888032 | 0.00141985 | 7.414   | turquoise | 1012.47 | 985.968 | 0.9922843 | 0.0008126 | 7.33    | 0     |
| AY609495.1     | CCNI     | turquoise | 1401   | 1400.3582 | 0.9739832 | 0.00501779 | 268.918 | turquoise | 209.863 | 149.944 | 0.5508475 | 0.3359292 | 398.6   | 0     |
| AY609516.1     | LECT1    | turquoise | 1554.1 | 1553.7169 | 0.9965962 | 0.00023827 | 45.294  | turquoise | 1023.98 | 995.545 | 0.9947703 | 0.0004536 | 27.104  | 0.35  |
| AY609525.1     | CBX3     | turquoise | 159.69 | 126.26356 | 0.4059008 | 0.49775542 | 120.326 | turquoise | 313.851 | 218.874 | 0.6305386 | 0.254108  | 93.798  | 99    |
| AY609579.1     | C14orf37 | turquoise | 1370.3 | 1369.3508 | 0.9692549 | 0.00644147 | 15.78   | turquoise | 995.82  | 949.526 | 0.9841518 | 0.0023893 | 14.438  | --    |
| AY609735.1     | GPR177   | turquoise | 1391.7 | 1391.1597 | 0.9690753 | 0.0064978  | 34.372  | turquoise | 925.261 | 901.099 | 0.9700576 | 0.0061916 | 31.114  | 0     |
| AY609784.1     | GSTM3    | turquoise | 102.92 | 77.241766 | 0.3411335 | 0.57423317 | 28.532  | turquoise | 275.216 | 190.595 | 0.5979169 | 0.2868809 | 23.84   | 0.184 |
| AY609849.1     | UBE2S    | turquoise | 485.4  | 470.59146 | 0.7072554 | 0.18155637 | 98.418  | turquoise | 740.088 | 698.541 | 0.9083056 | 0.0328687 | 106.416 | --    |
| AY609859.1     | NECAP2   | turquoise | 949.91 | 948.72568 | 0.8882854 | 0.04406402 | 15.614  | turquoise | 896.588 | 874.789 | 0.9631118 | 0.0084576 | 18.31   | 0     |
| AY609862.1     | UBL7     | turquoise | 637.04 | 629.43413 | 0.7840517 | 0.11648364 | 37.714  | turquoise | 1002.13 | 961.028 | 0.9872424 | 0.0017264 | 37.97   | --    |
| AY609871.1     | D4S234E  | turquoise | 1525.2 | 1524.6931 | 0.9931553 | 0.00067908 | 20.07   | turquoise | 1031.25 | 1001.18 | 0.996291  | 0.000271  | 65.096  | --    |
| AY609874.1     | RAB18    | turquoise | 1462.9 | 1462.2663 | 0.983773  | 0.00247532 | 111.832 | turquoise | 972.237 | 889.256 | 0.9685321 | 0.0066692 | 147.482 | 0     |
| AY609884.1     | TRA2A    | turquoise | 216.93 | 185.28763 | 0.4761295 | 0.41752829 | 85.632  | turquoise | 996.491 | 971.226 | 0.9887058 | 0.0014384 | 79.11   | --    |
| AY609892.1     | TMEM98   | turquoise | 302.4  | 287.73285 | 0.6059139 | 0.27874988 | 68.854  | turquoise | 1029.32 | 993.233 | 0.9946851 | 0.0004648 | 60.926  | 0     |
| AY610017.1     | CCT6A    | turquoise | 753.14 | 747.96232 | 0.8259744 | 0.08483575 | 106.458 | turquoise | 594.908 | 501.347 | 0.8361819 | 0.077608  | 127.482 | --    |
| AY610049.1     | TSPAN7   | turquoise | 932.35 | 928.86868 | 0.8777816 | 0.05033989 | 24.394  | turquoise | 1015.27 | 988.541 | 0.9929221 | 0.0007141 | 2.098   | --    |
| AY610051.1     | NUDC     | turquoise | 421.42 | 413.14169 | 0.6861997 | 0.20078603 | 66.024  | turquoise | 510.337 | 441.759 | 0.7995081 | 0.104464  | 66.064  | --    |
| AY610126.1     | MEAF6    | turquoise | 1558.2 | 1557.7717 | 0.9985103 | 6.90E-05   | 8.656   | turquoise | 579.772 | 435.508 | 0.7963961 | 0.1068522 | 21.452  | --    |
| AY610316.1     | OLFM1    | turquoise | 1522   | 1521.4669 | 0.9928179 | 0.00072986 | 4.306   | turquoise | 1019.09 | 991.564 | 0.9937292 | 0.0005955 | 13.874  | --    |
| AY610444.1     | UBE2C    | turquoise | 1533.8 | 1533.3027 | 0.9951178 | 0.0004092  | 5.982   | turquoise | 310.626 | 221.295 | 0.6385601 | 0.2462143 | 7.566   | 0     |
| AY610488.1     | SNRPG    | turquoise | 1454.7 | 1453.9286 | 0.9836187 | 0.00251065 | 16.418  | turquoise | 336.502 | 236.039 | 0.6492887 | 0.2357633 | 27.326  | --    |
| AY609627.1     | UBA5     | turquoise | 1402.3 | 1401.7144 | 0.9764952 | 0.00431054 | 8.366   | turquoise | 359.279 | 267.828 | 0.6867005 | 0.2003223 | 13.064  | 0.167 |
| AY609641.1     | MPPED2   | turquoise | 1532.9 | 1532.5221 | 0.9929308 | 0.00071274 | 7.252   | turquoise | 937.349 | 916.655 | 0.9742539 | 0.0049399 | 7.246   | --    |
| AY609650.1     | REXO2    | turquoise | 1484.1 | 1483.6012 | 0.9864291 | 0.00189393 | 27.258  | turquoise | 1018.42 | 954.266 | 0.9860137 | 0.0019814 | 39.142  | --    |
| NM_001001264.1 | WT1      | turquoise | 1334   | 1332.8881 | 0.9624075 | 0.00870003 | 0.69    | turquoise | 1034.47 | 1003.66 | 0.9969667 | 0.0002004 | 1.906   | 0     |
| AY705919.1     | UBE2R2   | turquoise | 1449.3 | 1448.6714 | 0.9790117 | 0.00363854 | 6.262   | turquoise | 492.844 | 424.02  | 0.7901376 | 0.111704  | 16.088  | --    |
| NM_001011727.1 | AHCY     | turquoise | 118.34 | 62.959593 | 0.2304661 | 0.70918023 | 35.666  | turquoise | 996.101 | 937.512 | 0.9816107 | 0.0029852 | 28.39   | 0     |
| NM_001012299.1 | SCG2     | turquoise | 1553.6 | 1553.1829 | 0.9965278 | 0.00024548 | 0.426   | turquoise | 1015.27 | 988.541 | 0.9929221 | 0.0007141 | 7.512   | --    |
| AY803123.1     | LOC10029 | turquoise | 1553.6 | 1553.1829 | 0.9965278 | 0.00024548 | 0.472   | turquoise | 1015.27 | 988.541 | 0.9929221 | 0.0007141 | 6.158   | --    |
| NM_001032355.1 | DNMT1    | turquoise | 1406.7 | 1405.8402 | 0.9753117 | 0.00463933 | 21.748  | turquoise | 389.16  | 300.41  | 0.7104738 | 0.178666  | 25.116  | 0     |
| NM_001032358.1 | PIGK     | turquoise | 1470.4 | 1469.935  | 0.985809  | 0.00202501 | 23.64   | turquoise | 523.455 | 381.711 | 0.7678075 | 0.1295299 | 27.05   | --    |
| NM_001037145.1 | SNCA     | turquoise | 914.91 | 913.72425 | 0.8720149 | 0.0538958  | 1.992   | turquoise | 758.42  | 741.016 | 0.921063  | 0.0263054 | 5.152   | 99    |
| NM_001037147.1 | PRPH     | turquoise | 1426   | 1425.5037 | 0.9754661 | 0.00459599 | 2.91    | turquoise | 294.351 | 235.308 | 0.6537674 | 0.2314373 | 3.316   | 0     |

|                |        |           |        |           |           |            |         |           |         |         |           |           |         |      |
|----------------|--------|-----------|--------|-----------|-----------|------------|---------|-----------|---------|---------|-----------|-----------|---------|------|
| NM_001037965.1 | ID2    | turquoise | 1506.5 | 1506.1055 | 0.9892345 | 0.00133871 | 14.57   | turquoise | 1002.71 | 956.464 | 0.9856581 | 0.0020574 | 20.262  | 99   |
| NM_001038636.1 | PALM   | turquoise | 1508.2 | 1507.78   | 0.9905037 | 0.0011093  | 10.5    | turquoise | 837.538 | 751.722 | 0.927897  | 0.0229885 | 16.008  | 99   |
| DQ351713.1     | CRTAC1 | turquoise | 1351.3 | 1350.2355 | 0.9653116 | 0.00771504 | 2.51    | turquoise | 1005.59 | 977.733 | 0.9903828 | 0.0011305 | 3.138   | --   |
| NM_001039749.1 | DKK3   | turquoise | 1483.9 | 1483.1907 | 0.9883426 | 0.00150826 | 9.4     | turquoise | 747.721 | 604.584 | 0.8746903 | 0.0522366 | 13.654  | 0.09 |
| CB285786       |        | turquoise | 1553.6 | 1553.1829 | 0.9965278 | 0.00024548 | 1.086   | turquoise | 1015.27 | 988.541 | 0.9929221 | 0.0007141 | 5.616   | --   |
| CD572380       |        | turquoise | 1553.6 | 1553.1829 | 0.9965278 | 0.00024548 | 1.228   | turquoise | 1024.21 | 995.815 | 0.9948582 | 0.0004423 | 4.342   | --   |
| CD572468       |        | turquoise | 1553.6 | 1553.1829 | 0.9965278 | 0.00024548 | 0.85    | turquoise | 1004.25 | 979.276 | 0.9904644 | 0.0011162 | 3.336   | --   |
| AU295982       |        | turquoise | 1566.7 | 1566.3141 | 0.9992322 | 2.55E-05   | 2.764   | turquoise | 996.279 | 959.238 | 0.9869814 | 0.0017796 | 3.226   | --   |
| CF177631       |        | turquoise | 932.74 | 929.49189 | 0.8791127 | 0.04953007 | 9.798   | turquoise | 1005.78 | 949.837 | 0.9848387 | 0.0022359 | 12.612  | --   |
| CF178410       |        | turquoise | 1465.2 | 1464.7584 | 0.9810953 | 0.00311138 | 1.182   | turquoise | 1018.3  | 990.538 | 0.9935022 | 0.0006281 | 6.36    | --   |
| CF178517       |        | turquoise | 484.71 | 479.80555 | 0.7182335 | 0.1717522  | 28.26   | turquoise | 869.182 | 845.859 | 0.9542493 | 0.0116661 | 22.68   | --   |
| CF179479       |        | turquoise | 1505.4 | 1505.0215 | 0.988146  | 0.00154653 | 5.046   | turquoise | 981.643 | 956.676 | 0.9847975 | 0.002245  | 7.114   | --   |
| CF180093       |        | turquoise | 833.39 | 830.2785  | 0.850143  | 0.06805153 | 4.342   | turquoise | 538.886 | 476.942 | 0.8334548 | 0.0795195 | 5.944   | --   |
| CF359145       |        | turquoise | 845.93 | 843.77254 | 0.8497325 | 0.06832693 | 0.282   | turquoise | 1015.27 | 988.541 | 0.9929221 | 0.0007141 | 1.76    | --   |
| CF363170       |        | turquoise | 1553.6 | 1553.1829 | 0.9965278 | 0.00024548 | 0.142   | turquoise | 1015.27 | 988.541 | 0.9929221 | 0.0007141 | 1.692   | --   |
| CF366893       |        | turquoise | 1568.1 | 1567.7087 | 0.9994784 | 1.43E-05   | 2.816   | turquoise | 614.819 | 507.747 | 0.8401736 | 0.074836  | 5.26    | --   |
| CF367389       |        | turquoise | 1115.5 | 1113.8644 | 0.9209456 | 0.02636359 | 1.156   | turquoise | 1016.19 | 989.215 | 0.9931356 | 0.000682  | 4.562   | --   |
| CF367397       |        | turquoise | 1553.6 | 1553.1829 | 0.9965278 | 0.00024548 | 1.464   | turquoise | 1015.27 | 988.541 | 0.9929221 | 0.0007141 | 2.368   | --   |
| CF791017       |        | turquoise | 1543.4 | 1542.9666 | 0.9965448 | 0.00024368 | 0.604   | turquoise | 1000.17 | 975.2   | 0.9895506 | 0.0012802 | 2.074   | --   |
| CF791227       |        | turquoise | 1541.1 | 1540.7394 | 0.9950624 | 0.00041619 | 15.174  | turquoise | 829.197 | 707.382 | 0.9126179 | 0.0305979 | 28.228  | --   |
| BX665171       |        | turquoise | 1519.5 | 1518.9825 | 0.9920329 | 0.00085263 | 6.312   | turquoise | 537.906 | 508.751 | 0.8317847 | 0.0806972 | 9.566   | --   |
| BX665337       |        | turquoise | 1377   | 1376.0224 | 0.9717854 | 0.00566498 | 20.1    | turquoise | 870.582 | 839.029 | 0.9532101 | 0.012064  | 20.602  | 0    |
| BX665422       |        | turquoise | 544.66 | 536.37852 | 0.7539834 | 0.14095041 | 103.442 | turquoise | 489.78  | 401.899 | 0.7748127 | 0.1238531 | 108.826 | --   |
| BX665515       |        | turquoise | 1333.7 | 1332.7863 | 0.9640027 | 0.00815416 | 30.71   | turquoise | 968.086 | 889.355 | 0.9686512 | 0.0066315 | 34.544  | --   |
| BX665627       |        | turquoise | 818.19 | 814.75268 | 0.8547508 | 0.06498434 | 15.808  | turquoise | 593.867 | 497.472 | 0.830038  | 0.0819346 | 17.906  | --   |
| BX666107       |        | turquoise | 1566.9 | 1566.484  | 0.9987289 | 5.44E-05   | 3.904   | turquoise | 1020.62 | 991.087 | 0.9940142 | 0.0005554 | 3.844   | --   |
| BX666112       |        | turquoise | 207.75 | 166.36673 | 0.4521666 | 0.44455209 | 23.298  | turquoise | 1042.1  | 990.883 | 0.9946168 | 0.0004737 | 18.444  | --   |
| BX667112       |        | turquoise | 253.94 | 214.40285 | 0.504613  | 0.38592354 | 86.772  | turquoise | 963.006 | 898.311 | 0.9714388 | 0.0057694 | 105.314 | --   |
| BX667489       |        | turquoise | 1553.6 | 1553.1829 | 0.9965278 | 0.00024548 | 0.284   | turquoise | 1010.22 | 984.289 | 0.9918412 | 0.0008836 | 3.122   | --   |
| BX667494       |        | turquoise | 433.45 | 416.99407 | 0.6808827 | 0.20572736 | 19.134  | turquoise | 1047.56 | 993.389 | 0.9954697 | 0.0003658 | 14.598  | --   |
| BX666727       |        | turquoise | 866.73 | 864.94405 | 0.8565286 | 0.06381279 | 8.978   | turquoise | 866.713 | 849.7   | 0.9549882 | 0.011386  | 8.982   | --   |
| BX666776       |        | turquoise | 1333.8 | 1332.9908 | 0.9612576 | 0.00910067 | 10.034  | turquoise | 1024.86 | 994.911 | 0.9946809 | 0.0004653 | 12.394  | --   |
| BX667130       |        | turquoise | 930.59 | 927.80585 | 0.8798166 | 0.04910346 | 28.676  | turquoise | 991.655 | 967.623 | 0.9874736 | 0.0016798 | 23.638  | --   |
| BX667206       |        | turquoise | 576.04 | 564.61064 | 0.7509324 | 0.143509   | 14.928  | turquoise | 1000.5  | 975.765 | 0.9896239 | 0.0012668 | 24.222  | --   |
| BX667724       |        | turquoise | 1553.6 | 1553.1829 | 0.9965278 | 0.00024548 | 0.094   | turquoise | 1015.27 | 988.541 | 0.9929221 | 0.0007141 | 2.03    | --   |
| BX668405       |        | turquoise | 273.84 | 268.95686 | 0.6111962 | 0.27341307 | 38.17   | turquoise | 194.04  | 156.093 | 0.5671019 | 0.318769  | 22.414  | --   |

|          |           |        |           |           |            |         |           |         |         |           |           |         |       |
|----------|-----------|--------|-----------|-----------|------------|---------|-----------|---------|---------|-----------|-----------|---------|-------|
| BX668485 | turquoise | 1554.9 | 1554.4992 | 0.9967423 | 0.00022309 | 30.222  | turquoise | 1026.5  | 997.622 | 0.9953409 | 0.0003815 | 15.512  | --    |
| BX669151 | turquoise | 1553.6 | 1553.1829 | 0.9965278 | 0.00024548 | 6.754   | turquoise | 1018.01 | 990.802 | 0.9935229 | 0.0006251 | 14.56   | --    |
| BX669234 | turquoise | 1553.6 | 1553.1829 | 0.9965278 | 0.00024548 | 0.142   | turquoise | 1015.27 | 988.541 | 0.9929221 | 0.0007141 | 2.3     | --    |
| BX669322 | turquoise | 1425.4 | 1424.5967 | 0.9777035 | 0.0039832  | 19.196  | turquoise | 1046.38 | 1007.48 | 0.9983255 | 8.22E-05  | 40.788  | 99    |
| BX670093 | turquoise | 188.29 | 104.15361 | 0.2818851 | 0.64590421 | 3.854   | turquoise | 1043.16 | 1008.64 | 0.9984168 | 7.56E-05  | 4.052   | 99    |
| BX670180 | turquoise | 1394.3 | 1393.5899 | 0.9747276 | 0.00480453 | 119.022 | turquoise | 730.149 | 606.637 | 0.8763964 | 0.051187  | 169.282 | --    |
| BX670270 | turquoise | 1484.1 | 1483.6872 | 0.9851047 | 0.00217739 | 14.356  | turquoise | 506.907 | 472.998 | 0.8333572 | 0.0795882 | 24.598  | --    |
| BX670323 | turquoise | 189.16 | 102.82891 | 0.2621294 | 0.67010897 | 23.876  | turquoise | 820.242 | 692.322 | 0.9078103 | 0.0331329 | 24.796  | 0     |
| BX670437 | turquoise | 1392.3 | 1391.7539 | 0.9676894 | 0.00693801 | 6.112   | turquoise | 1010.23 | 984.192 | 0.9918494 | 0.0008822 | 12.802  | --    |
| BX670438 | turquoise | 128    | 105.34445 | 0.3878004 | 0.51890869 | 4.462   | turquoise | 735.816 | 718.24  | 0.913859  | 0.0299541 | 4.222   | --    |
| BX670600 | turquoise | 465.33 | 453.14829 | 0.7104975 | 0.1786447  | 7.858   | turquoise | 908.916 | 819.771 | 0.9485354 | 0.0139064 | 2.646   | --    |
| BX670766 | turquoise | 1553.6 | 1553.1829 | 0.9965278 | 0.00024548 | 0.566   | turquoise | 1018.71 | 991.371 | 0.9936743 | 0.0006034 | 11.582  | 0     |
| BX670931 | turquoise | 273.54 | 236.93788 | 0.5250387 | 0.36362868 | 17.584  | turquoise | 1054.15 | 1011.11 | 0.999521  | 1.26E-05  | 16.744  | --    |
| BX671254 | turquoise | 1533.6 | 1533.1632 | 0.9947684 | 0.00045388 | 5.452   | turquoise | 1041.37 | 988.531 | 0.9941268 | 0.0005398 | 15.596  | --    |
| BX671284 | turquoise | 893.24 | 890.45675 | 0.8691231 | 0.05570749 | 1.112   | turquoise | 1018.53 | 984.68  | 0.9923004 | 0.0008101 | 3.69    | --    |
| BX671531 | turquoise | 1505.7 | 1505.2879 | 0.9876046 | 0.00165355 | 2.596   | turquoise | 753.884 | 703.16  | 0.911741  | 0.0310555 | 12.096  | --    |
| BX671826 | turquoise | 1319.9 | 1319.2268 | 0.9560031 | 0.01100475 | 3.708   | turquoise | 963.136 | 941.561 | 0.9807639 | 0.0031934 | 5.258   | --    |
| BX672205 | turquoise | 1553.6 | 1553.1829 | 0.9965278 | 0.00024548 | 6.754   | turquoise | 973.517 | 945.808 | 0.9827056 | 0.0027231 | 2.944   | --    |
| BX672270 | turquoise | 1478.9 | 1478.4813 | 0.9837619 | 0.00247785 | 3.372   | turquoise | 937.474 | 899.465 | 0.9705728 | 0.006033  | 6.036   | 0.432 |
| BX672673 | turquoise | 1452.4 | 1451.7872 | 0.9796013 | 0.00348662 | 24.538  | turquoise | 768.907 | 706.319 | 0.9152808 | 0.0292219 | 27.486  | --    |
| BX672674 | turquoise | 1453.9 | 1453.3034 | 0.9791473 | 0.00360341 | 19.118  | turquoise | 857.911 | 795.297 | 0.9417122 | 0.0167443 | 52.556  | --    |
| BX673261 | turquoise | 563.01 | 552.91864 | 0.753879  | 0.14103773 | 5.262   | turquoise | 976.147 | 950.429 | 0.9833541 | 0.0025716 | 4.056   | --    |
| BX673328 | turquoise | 1100.7 | 1099.9117 | 0.9229626 | 0.025369   | 4.828   | turquoise | 668.453 | 647.183 | 0.8903038 | 0.0428887 | 6.204   | --    |
| BX673363 | turquoise | 1535.3 | 1534.8472 | 0.9932382 | 0.00066679 | 14.174  | turquoise | 332.134 | 256.647 | 0.6717036 | 0.2143364 | 21.148  | 99    |
| BX673388 | turquoise | 1336.4 | 1335.5657 | 0.9619767 | 0.00884945 | 1.496   | turquoise | 1023.76 | 992.677 | 0.9941693 | 0.000534  | 4.038   | --    |
| BX673567 | turquoise | 862.91 | 861.5948  | 0.8620943 | 0.06018845 | 12.252  | turquoise | 957.09  | 935.878 | 0.9790444 | 0.0036301 | 14.046  | --    |
| BX673587 | turquoise | 1492.9 | 1492.3381 | 0.9888559 | 0.00140985 | 75.96   | turquoise | 527.405 | 389.701 | 0.7738595 | 0.1246211 | 181.912 | --    |
| BX673843 | turquoise | 1057.4 | 1056.3212 | 0.9107373 | 0.03158181 | 33.454  | turquoise | 961.15  | 873.597 | 0.9642402 | 0.0080739 | 36.516  | --    |
| BX674049 | turquoise | 1516.5 | 1515.9459 | 0.9919273 | 0.00086963 | 7.016   | turquoise | 931.59  | 848.879 | 0.957871  | 0.0103144 | 10.904  | --    |
| BX674094 | turquoise | 36.406 | 29.18535  | 0.2116853 | 0.73250063 | 88.892  | turquoise | 1023.95 | 994.375 | 0.9945688 | 0.0004801 | 76.426  | --    |
| BX674245 | turquoise | 158.92 | 137.05261 | 0.4495773 | 0.44749479 | 33.57   | turquoise | 853.741 | 797.812 | 0.9420499 | 0.0165998 | 28.972  | 0     |
| BX674443 | turquoise | 1158.8 | 1157.3087 | 0.9311339 | 0.02146862 | 1.79    | turquoise | 1032.9  | 989.885 | 0.9940264 | 0.0005537 | 4.242   | --    |
| BX674924 | turquoise | 1082.7 | 1081.9528 | 0.9184457 | 0.02761333 | 1.196   | turquoise | 963.516 | 940.985 | 0.9807165 | 0.0032052 | 5.376   | 99    |
| BX675092 | turquoise | 1479.1 | 1478.6309 | 0.984875  | 0.00222786 | 19.5    | turquoise | 691.843 | 635.987 | 0.8858646 | 0.0454868 | 17.272  | --    |
| BX675290 | turquoise | 1489.5 | 1488.9343 | 0.9879029 | 0.00159428 | 1.398   | turquoise | 1043.3  | 1009.63 | 0.9986144 | 6.19E-05  | 3.038   | --    |
| BX675465 | turquoise | 1451.3 | 1450.6315 | 0.9819085 | 0.00291315 | 14.828  | turquoise | 341.26  | 266.359 | 0.6767253 | 0.2096144 | 18.534  | --    |

|          |           |        |           |           |            |         |           |         |         |           |           |        |       |
|----------|-----------|--------|-----------|-----------|------------|---------|-----------|---------|---------|-----------|-----------|--------|-------|
| BX675792 | turquoise | 132.08 | 110.7675  | 0.3951871 | 0.51025436 | 112.632 | turquoise | 522.219 | 491.58  | 0.823978  | 0.0862723 | 92.492 | --    |
| BX675898 | turquoise | 1168.1 | 1167.2146 | 0.9280019 | 0.0229387  | 10.754  | turquoise | 1005.6  | 980.122 | 0.9907692 | 0.0010631 | 13.998 | 99    |
| BX675902 | turquoise | 1553.6 | 1553.1829 | 0.9965278 | 0.00024548 | 3.402   | turquoise | 1015.27 | 988.541 | 0.9929221 | 0.0007141 | 14.548 | --    |
| BP156692 | turquoise | 1480.4 | 1479.9351 | 0.9876263 | 0.00164921 | 6.836   | turquoise | 941.862 | 862.222 | 0.9617232 | 0.0089378 | 7.898  | --    |
| BP156716 | turquoise | 1134.6 | 1132.9607 | 0.9270924 | 0.02337147 | 18.34   | turquoise | 1000.33 | 968.169 | 0.9885147 | 0.001475  | 23.024 | --    |
| BP164138 | turquoise | 447.1  | 439.36387 | 0.7053465 | 0.18327693 | 55.516  | turquoise | 959.361 | 936.385 | 0.9796484 | 0.0034746 | 63.162 | --    |
| BP165213 | turquoise | 1463.3 | 1462.5903 | 0.984879  | 0.00222699 | 7.12    | turquoise | 664.478 | 617.201 | 0.8793678 | 0.0493753 | 11.382 | --    |
| BP166941 | turquoise | 1456   | 1455.2799 | 0.9820791 | 0.00287213 | 2.184   | turquoise | 412.147 | 331.194 | 0.7403061 | 0.1525247 | 0.9    | --    |
| BP169101 | turquoise | 127.71 | 105.6723  | 0.3843044 | 0.52301489 | 1.758   | turquoise | 987.529 | 964.265 | 0.9865505 | 0.0018686 | 5.016  | --    |
| BP169289 | turquoise | 358.94 | 356.22801 | 0.6841766 | 0.20266223 | 11.88   | turquoise | 753.031 | 717.113 | 0.9174659 | 0.0281082 | 23.154 | --    |
| BP170588 | turquoise | 1492.3 | 1491.7272 | 0.9891082 | 0.0013623  | 54.598  | turquoise | 967.477 | 909.16  | 0.9752929 | 0.0046446 | 60.676 | 0.394 |
| BP170821 | turquoise | 749.83 | 745.3353  | 0.8303924 | 0.08168311 | 4.604   | turquoise | 1023.26 | 993.656 | 0.994349  | 0.0005095 | 6.422  | 0     |
| BP171491 | turquoise | 1507.3 | 1506.7814 | 0.9903954 | 0.0011283  | 16.57   | turquoise | 1042    | 1006.82 | 0.9980075 | 0.0001067 | 20.81  | --    |
| BP173206 | turquoise | 1566.3 | 1565.8526 | 0.9991557 | 2.94E-05   | 14.914  | turquoise | 1000.17 | 926.31  | 0.9785357 | 0.0037628 | 23.708 | --    |
| BP436950 | turquoise | 1523.8 | 1523.3263 | 0.9930891 | 0.00068894 | 65.68   | turquoise | 604.687 | 501.472 | 0.8315923 | 0.0808332 | 80.48  | --    |
| BP438990 | turquoise | 1409.1 | 1408.4669 | 0.9710859 | 0.00587633 | 21.354  | turquoise | 526.981 | 513.064 | 0.8376358 | 0.0765947 | 20.816 | --    |
| BP440821 | turquoise | 1291.7 | 1291.0767 | 0.9506984 | 0.01304329 | 4.036   | turquoise | 872.006 | 833.377 | 0.9524036 | 0.0123757 | 4.504  | --    |
| BP141462 | turquoise | 1564.9 | 1564.4665 | 0.9991211 | 3.13E-05   | 9.096   | turquoise | 41.9174 | 12.5864 | 0.126011  | 0.8399834 | 17.876 | 0     |
| BP144557 | turquoise | 1525.8 | 1525.3859 | 0.9933492 | 0.00065045 | 3.86    | turquoise | 692.206 | 636.258 | 0.8936125 | 0.0409841 | 8.908  | --    |
| BP148354 | turquoise | 1568.2 | 1567.8575 | 0.9990179 | 3.69E-05   | 2.068   | turquoise | 890.331 | 806.981 | 0.9452713 | 0.0152426 | 2.402  | --    |
| BP153914 | turquoise | 1558.5 | 1558.1344 | 0.9970811 | 0.00018922 | 2.684   | turquoise | 996.818 | 960.685 | 0.9869137 | 0.0017935 | 8.928  | --    |
| CK449358 | turquoise | 1454   | 1453.3486 | 0.98217   | 0.00285034 | 10.244  | turquoise | 1028.28 | 993.235 | 0.9948395 | 0.0004447 | 18.186 | --    |
| CK450265 | turquoise | 1543.4 | 1542.9737 | 0.9960353 | 0.0002995  | 8.192   | turquoise | 1003.26 | 939.958 | 0.9820327 | 0.0028833 | 18.226 | --    |
| CK450911 | turquoise | 655.83 | 649.49586 | 0.7931683 | 0.10934637 | 14.738  | turquoise | 795.09  | 777.455 | 0.9366053 | 0.0189775 | 12.064 | --    |
| CK451122 | turquoise | 1549.9 | 1549.4394 | 0.9975517 | 0.00014537 | 16.78   | turquoise | 618.129 | 489.366 | 0.8262257 | 0.0846554 | 8.996  | --    |
| CK451295 | turquoise | 1276   | 1274.7178 | 0.954212  | 0.01168036 | 23.548  | turquoise | 986.315 | 935.195 | 0.9807557 | 0.0031954 | 20.83  | --    |
| CK451467 | turquoise | 1567.2 | 1566.7471 | 0.9994381 | 1.60E-05   | 18.308  | turquoise | 1044.47 | 1008.05 | 0.998321  | 8.26E-05  | 19.166 | 99    |
| CK451551 | turquoise | 1143.1 | 1141.0577 | 0.9258056 | 0.02398819 | 79.476  | turquoise | 942.408 | 849.632 | 0.9576846 | 0.0103826 | 75.596 | --    |
| CK452729 | turquoise | 1105.3 | 1102.9051 | 0.9171194 | 0.02828389 | 27.88   | turquoise | 1043.88 | 992.651 | 0.9951884 | 0.0004004 | 32.63  | --    |
| CK452774 | turquoise | 1348.8 | 1347.7159 | 0.9659335 | 0.0075092  | 17.6    | turquoise | 1042.39 | 1005.37 | 0.9978943 | 0.000116  | 15.246 | --    |
| CK452818 | turquoise | 1219   | 1218.363  | 0.9421278 | 0.01656658 | 4.234   | turquoise | 997.126 | 963.92  | 0.9879252 | 0.0015899 | 10.684 | --    |
| CK452842 | turquoise | 1308.5 | 1307.771  | 0.9564142 | 0.01085156 | 6.334   | turquoise | 948.599 | 922.259 | 0.9761083 | 0.0044172 | 6.064  | --    |
| CK452952 | turquoise | 910.33 | 907.37344 | 0.8777018 | 0.05038857 | 136.606 | turquoise | 428.612 | 331.015 | 0.7300868 | 0.1613445 | 94.798 | --    |
| CK452970 | turquoise | 1571.4 | 1571.0325 | 0.9997393 | 5.05E-06   | 1.924   | turquoise | 937.837 | 858.929 | 0.960262  | 0.0094523 | 3.152  | --    |
| CK452980 | turquoise | 1322.2 | 1321.4826 | 0.9637749 | 0.00823142 | 13.508  | turquoise | 353.615 | 228.089 | 0.6557709 | 0.2295093 | 20.812 | 0.15  |
| CK453021 | turquoise | 1340.9 | 1339.916  | 0.9634823 | 0.00833097 | 22.298  | turquoise | 681.854 | 582.816 | 0.8670909 | 0.0569918 | 33.072 | 99    |

|          |           |        |           |           |            |        |           |         |         |           |           |        |    |
|----------|-----------|--------|-----------|-----------|------------|--------|-----------|---------|---------|-----------|-----------|--------|----|
| CK454052 | turquoise | 598.42 | 590.35082 | 0.7707728 | 0.12711766 | 2.354  | turquoise | 1032.78 | 1000.94 | 0.9962882 | 0.0002713 | 4.412  | -- |
| CK454514 | turquoise | 615.56 | 610.26563 | 0.7810684 | 0.11884849 | 53.26  | turquoise | 938.47  | 914.486 | 0.9740481 | 0.0049991 | 43.462 | -- |
| CK454991 | turquoise | 1469.2 | 1468.6119 | 0.9853948 | 0.00211418 | 38.736 | turquoise | 862.245 | 755.868 | 0.9301224 | 0.02194   | 47.804 | -- |
| CK455126 | turquoise | 1481.7 | 1481.2482 | 0.9848163 | 0.00224083 | 49.388 | turquoise | 248.686 | 196.346 | 0.6189095 | 0.2656695 | 71.286 | -- |
| CK455184 | turquoise | 1304.7 | 1303.6486 | 0.9584305 | 0.01011041 | 24.018 | turquoise | 203.765 | 118.391 | 0.5309738 | 0.3572112 | 38.158 | -- |
| CK455320 | turquoise | 77.403 | 51.400012 | 0.2431458 | 0.69349515 | 4.188  | turquoise | 1005.15 | 952.532 | 0.9847682 | 0.0022515 | 8.16   | -- |
| CK455502 | turquoise | 1550.5 | 1550.0676 | 0.9956518 | 0.00034397 | 4.784  | turquoise | 547.5   | 532.49  | 0.848513  | 0.069147  | 4.258  | -- |
| CK455968 | turquoise | 190.76 | 165.9108  | 0.497607  | 0.39364296 | 6.898  | turquoise | 904.854 | 879.334 | 0.9646123 | 0.0079487 | 7.82   | -- |
| CK456799 | turquoise | 1521.1 | 1520.7294 | 0.9911154 | 0.00100394 | 2.75   | turquoise | 1051.45 | 1012.64 | 0.999701  | 6.21E-06  | 6.734  | -- |
| CK456945 | turquoise | 1554.9 | 1554.4797 | 0.9970531 | 0.00019195 | 5.212  | turquoise | 1001.4  | 976.424 | 0.9897691 | 0.0012403 | 12.076 | -- |
| CK458238 | turquoise | 1333   | 1331.8174 | 0.962473  | 0.00867741 | 15.708 | turquoise | 1020.55 | 959.242 | 0.9868046 | 0.001816  | 11.296 | -- |
| CK458354 | turquoise | 1562.1 | 1561.7248 | 0.9982378 | 8.88E-05   | 10.322 | turquoise | 509.9   | 383.472 | 0.7701555 | 0.1276187 | 14.57  | -- |
| CK458731 | turquoise | 368.4  | 344.75517 | 0.6266217 | 0.25798671 | 0.728  | turquoise | 1020.88 | 993.049 | 0.9941423 | 0.0005377 | 2.27   | -- |
| CK458744 | turquoise | 935.51 | 931.51797 | 0.8760914 | 0.0513742  | 32.046 | turquoise | 787.714 | 659.635 | 0.896853  | 0.0391456 | 29.738 | 99 |
| CK459071 | turquoise | 1444.7 | 1443.9641 | 0.981849  | 0.00292751 | 14.756 | turquoise | 844.661 | 744.07  | 0.9255128 | 0.0241292 | 9.788  | 0  |
| CK459081 | turquoise | 601.94 | 595.64335 | 0.7776696 | 0.12155995 | 71.884 | turquoise | 978.02  | 921.99  | 0.9777907 | 0.0039599 | 67.7   | -- |
| CK459449 | turquoise | 1564.8 | 1564.3642 | 0.9992058 | 2.69E-05   | 1.634  | turquoise | 965.099 | 936.428 | 0.9809871 | 0.0031381 | 5.36   | -- |
| CK460198 | turquoise | 1132.7 | 1131.1413 | 0.9212089 | 0.02623306 | 1.226  | turquoise | 1011.25 | 982.917 | 0.991849  | 0.0008823 | 4.844  | -- |
| CK461258 | turquoise | 1553.6 | 1553.1829 | 0.9965278 | 0.00024548 | 0.566  | turquoise | 1015.27 | 988.541 | 0.9929221 | 0.0007141 | 3.586  | -- |
| CK461875 | turquoise | 1512   | 1511.6306 | 0.9885909 | 0.00146038 | 3.642  | turquoise | 657.791 | 635.208 | 0.8846065 | 0.046232  | 5.884  | -- |
| CK462022 | turquoise | 779.66 | 776.22375 | 0.8453497 | 0.07128859 | 3.7    | turquoise | 982.577 | 950.197 | 0.9846629 | 0.0022748 | 3.62   | -- |
| CK462358 | turquoise | 1507.4 | 1506.9445 | 0.9901349 | 0.00117447 | 1.504  | turquoise | 1021.31 | 992.243 | 0.9940312 | 0.0005531 | 7.754  | -- |
| CK462854 | turquoise | 1490.4 | 1490.0325 | 0.987529  | 0.00166867 | 23.462 | turquoise | 1040.27 | 1006.68 | 0.9978953 | 0.0001159 | 27.63  | -- |
| CK463343 | turquoise | 1561.1 | 1560.6266 | 0.9990325 | 3.61E-05   | 15.106 | turquoise | 1020.88 | 975.716 | 0.9909538 | 0.0010314 | 9.706  | 99 |
| CK465210 | turquoise | 1413.2 | 1412.7453 | 0.9750951 | 0.00470036 | 8.948  | turquoise | 841.557 | 775.055 | 0.9389622 | 0.0179356 | 9.54   | -- |
| CK466505 | turquoise | 1145.8 | 1144.1783 | 0.9294311 | 0.02226394 | 16.828 | turquoise | 1043.29 | 994.672 | 0.9954824 | 0.0003642 | 16.412 | -- |
| CK466890 | turquoise | 721.4  | 714.11036 | 0.8106699 | 0.09603467 | 1.842  | turquoise | 1037.49 | 1002.36 | 0.9968293 | 0.0002142 | 7.386  | -- |
| CK467233 | turquoise | 1339.3 | 1338.7236 | 0.9589045 | 0.0099387  | 0.756  | turquoise | 1015.27 | 988.541 | 0.9929221 | 0.0007141 | 3.384  | -- |
| CK467614 | turquoise | 1498.8 | 1498.1999 | 0.989537  | 0.00128273 | 40.584 | turquoise | 635.656 | 583.483 | 0.8657364 | 0.057853  | 37.77  | -- |
| CK468440 | turquoise | 1551.2 | 1550.8342 | 0.9965866 | 0.00023927 | 4.264  | turquoise | 556.272 | 407.565 | 0.7812596 | 0.1186965 | 13.258 | -- |
| BX914375 | turquoise | 1553.6 | 1553.1829 | 0.9965278 | 0.00024548 | 1.89   | turquoise | 1005.41 | 980.176 | 0.9907131 | 0.0010728 | 4.366  | -- |
| BX914760 | turquoise | 1553.6 | 1553.1829 | 0.9965278 | 0.00024548 | 0.804  | turquoise | 1015.27 | 988.541 | 0.9929221 | 0.0007141 | 3.518  | -- |
| BX914900 | turquoise | 161.86 | 144.91294 | 0.4705464 | 0.42379009 | 14.344 | turquoise | 649.212 | 634.788 | 0.8830835 | 0.047139  | 17.346 | -- |
| BX914973 | turquoise | 1571.1 | 1570.748  | 0.9996267 | 8.66E-06   | 1.406  | turquoise | 977.993 | 918.488 | 0.9769811 | 0.0041779 | 1.396  | -- |
| BX915431 | turquoise | 1555.8 | 1555.4234 | 0.9978084 | 0.00012312 | 9.74   | turquoise | 1016.66 | 982.999 | 0.9918482 | 0.0008824 | 28.666 | -- |
| BX915705 | turquoise | 1453.8 | 1453.0907 | 0.9823162 | 0.00281542 | 2.426  | turquoise | 1007.91 | 982.278 | 0.9913196 | 0.0009696 | 5.18   | -- |

|          |           |        |           |           |            |         |           |         |         |           |           |         |       |
|----------|-----------|--------|-----------|-----------|------------|---------|-----------|---------|---------|-----------|-----------|---------|-------|
| BX915997 | turquoise | 1493   | 1492.5153 | 0.9865947 | 0.00185941 | 17.558  | turquoise | 841.446 | 776.582 | 0.9356732 | 0.0193949 | 19.434  | --    |
| BX917118 | turquoise | 1258.5 | 1257.3402 | 0.952055  | 0.01251124 | 42.718  | turquoise | 457.523 | 354.394 | 0.7565221 | 0.1388318 | 40.236  | --    |
| BX917311 | turquoise | 1070.1 | 1067.3775 | 0.9093819 | 0.0322971  | 126.948 | turquoise | 545.816 | 392.587 | 0.7724181 | 0.1257851 | 133.716 | --    |
| BX917504 | turquoise | 1553.6 | 1553.1829 | 0.9965278 | 0.00024548 | 0.708   | turquoise | 1008.06 | 982.377 | 0.9913589 | 0.000963  | 5.872   | --    |
| BX917585 | turquoise | 475.07 | 468.07365 | 0.7315336 | 0.16008712 | 33.224  | turquoise | 674.681 | 520.29  | 0.8404378 | 0.0746537 | 34.478  | 99    |
| BX917665 | turquoise | 513.91 | 510.63403 | 0.7370203 | 0.15534473 | 0.588   | turquoise | 795.15  | 778.155 | 0.9347568 | 0.019808  | 3.282   | --    |
| BX918032 | turquoise | 1553.6 | 1553.1829 | 0.9965278 | 0.00024548 | 0.142   | turquoise | 1015.27 | 988.541 | 0.9929221 | 0.0007141 | 1.556   | --    |
| BX918173 | turquoise | 593.5  | 582.51004 | 0.7594173 | 0.13642727 | 17.148  | turquoise | 1026.03 | 973.844 | 0.9905859 | 0.0010949 | 12.954  | --    |
| BX918187 | turquoise | 157.38 | 83.348877 | 0.2331709 | 0.70583017 | 165.034 | turquoise | 1008.35 | 939.735 | 0.9819762 | 0.0028969 | 144.09  | 0.404 |
| BX918528 | turquoise | 1553.6 | 1553.1829 | 0.9965278 | 0.00024548 | 0.756   | turquoise | 1015.27 | 988.541 | 0.9929221 | 0.0007141 | 9.068   | --    |
| BX918613 | turquoise | 1322.5 | 1321.8734 | 0.9561346 | 0.01095566 | 12.638  | turquoise | 682.513 | 599.9   | 0.8725967 | 0.0535336 | 30.818  | --    |
| BX918737 | turquoise | 1327.3 | 1326.7036 | 0.9553791 | 0.0112386  | 19.348  | turquoise | 737.459 | 652.451 | 0.8937059 | 0.0409307 | 27.558  | --    |
| BX918832 | turquoise | 316.98 | 304.6101  | 0.6268074 | 0.25780241 | 1.19    | turquoise | 1015.27 | 988.541 | 0.9929221 | 0.0007141 | 2.774   | 0     |
| BX919298 | turquoise | 174.98 | 158.21865 | 0.4918255 | 0.4000403  | 2.492   | turquoise | 918.372 | 898.839 | 0.9692911 | 0.0064301 | 2.952   | --    |
| BX919676 | turquoise | 136.18 | 121.96163 | 0.4480729 | 0.4492065  | 24.406  | turquoise | 998.243 | 967.233 | 0.988562  | 0.0014659 | 31.16   | --    |
| BX919821 | turquoise | 1345.6 | 1344.9948 | 0.9586317 | 0.01003743 | 2.232   | turquoise | 865.971 | 802.224 | 0.9455562 | 0.0151244 | 4.474   | --    |
| BX920452 | turquoise | 847.98 | 845.88179 | 0.8485763 | 0.06910444 | 102.958 | turquoise | 972.495 | 908.019 | 0.9742284 | 0.0049472 | 143.614 | --    |
| BX920732 | turquoise | 1252.4 | 1251.3773 | 0.9502187 | 0.01323317 | 14.848  | turquoise | 993.355 | 938.176 | 0.9819702 | 0.0028983 | 13.548  | --    |
| BX921084 | turquoise | 255.22 | 233.78845 | 0.5694528 | 0.3163061  | 19.226  | turquoise | 989.294 | 946.583 | 0.9831466 | 0.0026198 | 46.104  | 99    |
| BX921278 | turquoise | 1137.4 | 1135.6715 | 0.9286666 | 0.02262408 | 43.956  | turquoise | 128.107 | 77.3441 | 0.4384696 | 0.4601668 | 57.126  | --    |
| BX921846 | turquoise | 1421.8 | 1420.9375 | 0.9774369 | 0.00405467 | 130.464 | turquoise | 339.26  | 221.884 | 0.6342823 | 0.2504155 | 127.936 | --    |
| BX922199 | turquoise | 1554   | 1553.473  | 0.9980179 | 0.0001059  | 62.802  | turquoise | 556.365 | 427.354 | 0.8010447 | 0.1032909 | 43.902  | --    |
| BX922273 | turquoise | 1548.7 | 1548.2519 | 0.9970448 | 0.00019276 | 24.558  | turquoise | 1043.15 | 988.886 | 0.9943162 | 0.000514  | 42.66   | 99    |
| BX922394 | turquoise | 433.54 | 426.12918 | 0.7087231 | 0.18023656 | 17.15   | turquoise | 970.974 | 945.883 | 0.9823505 | 0.0028072 | 10.072  | --    |
| BX922568 | turquoise | 1543.8 | 1543.4253 | 0.9950151 | 0.00042218 | 2.706   | turquoise | 1017.09 | 989.967 | 0.9933698 | 0.0006474 | 5.37    | --    |
| BX922590 | turquoise | 1540.9 | 1540.5458 | 0.9937491 | 0.0005927  | 18.862  | turquoise | 349.153 | 276.162 | 0.692138  | 0.1953074 | 16.442  | --    |
| BX922774 | turquoise | 900.34 | 898.35297 | 0.8601638 | 0.06143807 | 11.556  | turquoise | 1014.17 | 985.201 | 0.9923845 | 0.0007969 | 19.42   | --    |
| BX922846 | turquoise | 891.25 | 889.90018 | 0.8679988 | 0.0564169  | 159.298 | turquoise | 1052.97 | 1011.87 | 0.9995056 | 1.32E-05  | 226.234 | --    |
| BX922933 | turquoise | 155.49 | 136.56422 | 0.4278334 | 0.4723728  | 25.106  | turquoise | 789.518 | 765.093 | 0.9299878 | 0.0220029 | 16.608  | --    |
| BX923391 | turquoise | 1048.2 | 1045.7925 | 0.9083435 | 0.03284854 | 19.804  | turquoise | 764.009 | 709.518 | 0.9133061 | 0.0302403 | 27.978  | --    |
| BX923394 | turquoise | 1477.7 | 1477.1571 | 0.9845562 | 0.00229857 | 4.048   | turquoise | 1006.86 | 980.591 | 0.9909575 | 0.0010308 | 8.01    | --    |
| BX923690 | turquoise | 1539.5 | 1539.037  | 0.9957672 | 0.00033037 | 32.738  | turquoise | 1037.13 | 999.142 | 0.99675   | 0.0002223 | 38.046  | --    |
| BX923706 | turquoise | 1501.4 | 1500.7932 | 0.9910854 | 0.00100903 | 22.152  | turquoise | 616.259 | 479.785 | 0.8201508 | 0.089047  | 40.998  | --    |
| BX923820 | turquoise | 1506.6 | 1506.1707 | 0.9883907 | 0.00149895 | 1.312   | turquoise | 997.435 | 973.321 | 0.9889052 | 0.0014005 | 3.35    | --    |
| BX923928 | turquoise | 154.35 | 96.725017 | 0.323839  | 0.5950001  | 21.836  | turquoise | 1011.38 | 974.469 | 0.9903654 | 0.0011336 | 23.184  | --    |
| BX924061 | turquoise | 1555.1 | 1554.6858 | 0.9972161 | 0.00017625 | 58.646  | turquoise | 938.041 | 849.171 | 0.9572839 | 0.0105298 | 56.584  | --    |

|          |           |        |           |           |            |        |           |         |         |           |           |        |    |
|----------|-----------|--------|-----------|-----------|------------|--------|-----------|---------|---------|-----------|-----------|--------|----|
| BX924264 | turquoise | 962.94 | 960.66684 | 0.8875719 | 0.0444819  | 24.054 | turquoise | 348.872 | 278.664 | 0.6911434 | 0.196222  | 26.39  | 0  |
| BX925008 | turquoise | 1564.1 | 1563.6999 | 0.9993827 | 1.84E-05   | 24.986 | turquoise | 980.761 | 900.764 | 0.9716526 | 0.0057049 | 39.96  | -- |
| BX925280 | turquoise | 1550.1 | 1549.6882 | 0.9956158 | 0.00034825 | 2.168  | turquoise | 1027.15 | 997.565 | 0.9953572 | 0.0003795 | 6.568  | -- |
| BX925298 | turquoise | 1064.7 | 1062.9895 | 0.9147224 | 0.02950879 | 1.382  | turquoise | 1040.48 | 1007.86 | 0.9981511 | 9.54E-05  | 5.912  | -- |
| BX925827 | turquoise | 1553.6 | 1553.1829 | 0.9965278 | 0.00024548 | 0.992  | turquoise | 1010.32 | 983.693 | 0.9918977 | 0.0008744 | 3.058  | -- |
| BX925865 | turquoise | 1462   | 1461.575  | 0.9800459 | 0.00337347 | 13.58  | turquoise | 562.147 | 428.586 | 0.7948754 | 0.1080251 | 27.444 | -- |
| BX925898 | turquoise | 1525.1 | 1524.6283 | 0.9936628 | 0.00060502 | 41.234 | turquoise | 357.278 | 290.694 | 0.6978904 | 0.1900414 | 67.11  | -- |
| BX926176 | turquoise | 946.94 | 945.31914 | 0.8726708 | 0.0534875  | 20.288 | turquoise | 1034.03 | 1001.11 | 0.9964268 | 0.0002563 | 37.862 | -- |
| BX926404 | turquoise | 1435.9 | 1435.33   | 0.9792381 | 0.00357995 | 9.854  | turquoise | 1043.18 | 1000.39 | 0.9967202 | 0.0002254 | 17.164 | -- |
| BX926703 | turquoise | 1535.2 | 1534.7105 | 0.9946951 | 0.00046345 | 2.62   | turquoise | 1009.79 | 942.226 | 0.9825265 | 0.0027654 | 2.434  | -- |
| BX926738 | turquoise | 1533.8 | 1533.4418 | 0.9933537 | 0.00064979 | 6.49   | turquoise | 962.156 | 879.594 | 0.965731  | 0.007576  | 11.54  | -- |
| BX926797 | turquoise | 1513.5 | 1512.9115 | 0.9927291 | 0.00074344 | 6.608  | turquoise | 299.32  | 225.115 | 0.6396702 | 0.2451273 | 9.42   | -- |
| BX926895 | turquoise | 715.51 | 711.44811 | 0.8125092 | 0.09466653 | 4.02   | turquoise | 1018.5  | 984.274 | 0.9924808 | 0.0007818 | 4.382  | -- |
| BX926938 | turquoise | 1532   | 1531.6105 | 0.9932286 | 0.00066821 | 1.714  | turquoise | 863.257 | 777.359 | 0.9374541 | 0.0186001 | 4.724  | -- |
| BX926955 | turquoise | 1489.6 | 1489.0542 | 0.9873055 | 0.00171367 | 13.872 | turquoise | 277.009 | 225.324 | 0.6521551 | 0.2329922 | 10.502 | -- |
| CN154817 | turquoise | 868.98 | 866.88242 | 0.8668749 | 0.0571289  | 0.804  | turquoise | 1015.27 | 988.541 | 0.9929221 | 0.0007141 | 1.692  | -- |
| CN154979 | turquoise | 417.38 | 410.19371 | 0.6813513 | 0.20529053 | 13.426 | turquoise | 540.389 | 512.715 | 0.832676  | 0.080068  | 22.648 | -- |
| CN155399 | turquoise | 1564.6 | 1564.2305 | 0.9985754 | 6.45E-05   | 5.124  | turquoise | 1037.14 | 1005.05 | 0.9973528 | 0.0001634 | 8.092  | -- |
| CN155773 | turquoise | 1564.9 | 1564.5476 | 0.9989255 | 4.23E-05   | 63.076 | turquoise | 1048.59 | 1005.12 | 0.997871  | 0.0001179 | 57.64  | -- |
| CN156021 | turquoise | 1472.5 | 1472.0498 | 0.984514  | 0.00230797 | 48.504 | turquoise | 754.046 | 649.556 | 0.8935215 | 0.0410361 | 45.198 | -- |
| CN156223 | turquoise | 1476.6 | 1476.0506 | 0.9833702 | 0.0025679  | 0.944  | turquoise | 994.237 | 970.24  | 0.9881179 | 0.001552  | 2.672  | -- |
| CN156290 | turquoise | 1109.1 | 1107.3334 | 0.9224371 | 0.02562693 | 5.086  | turquoise | 1008.16 | 980.723 | 0.9912093 | 0.0009881 | 8.224  | -- |
| CN156664 | turquoise | 1563.7 | 1563.3192 | 0.9982295 | 8.94E-05   | 3.542  | turquoise | 1011.71 | 985.579 | 0.9921675 | 0.0008311 | 4.136  | -- |
| CN156970 | turquoise | 595.79 | 592.75292 | 0.7716924 | 0.12637233 | 0.814  | turquoise | 1004.31 | 976.897 | 0.990236  | 0.0011565 | 4.2    | -- |
| CN157016 | turquoise | 1553.6 | 1553.1829 | 0.9965278 | 0.00024548 | 0.708  | turquoise | 1033.9  | 1003.25 | 0.9968539 | 0.0002117 | 1.972  | -- |
| CN157134 | turquoise | 1501.8 | 1501.3865 | 0.9890541 | 0.00137245 | 31.836 | turquoise | 978.785 | 946.434 | 0.9829373 | 0.0026686 | 38.886 | -- |
| CN157778 | turquoise | 1553.6 | 1553.1829 | 0.9965278 | 0.00024548 | 2.55   | turquoise | 1015.27 | 988.541 | 0.9929221 | 0.0007141 | 7.038  | -- |
| CN157824 | turquoise | 1214.4 | 1213.2163 | 0.9354898 | 0.01947729 | 21.472 | turquoise | 569.212 | 542.337 | 0.8547218 | 0.0650035 | 27.176 | -- |
| CN157905 | turquoise | 725.08 | 718.75928 | 0.8142353 | 0.09338796 | 17.276 | turquoise | 1045.09 | 1009.53 | 0.9987019 | 5.61E-05  | 14.794 | -- |
| CN157954 | turquoise | 1507.4 | 1506.9445 | 0.9901349 | 0.00117447 | 1.504  | turquoise | 1009.67 | 983.801 | 0.9917181 | 0.0009036 | 4.24   | -- |
| CN158074 | turquoise | 546.05 | 541.22333 | 0.7614401 | 0.13475468 | 6.302  | turquoise | 1017.96 | 988.693 | 0.9931235 | 0.0006838 | 8.3    | -- |
| CN158100 | turquoise | 421.37 | 409.44359 | 0.6938234 | 0.1937603  | 82.262 | turquoise | 812.952 | 751.032 | 0.927483  | 0.0231853 | 65.706 | -- |
| CN158117 | turquoise | 705.17 | 699.17207 | 0.8120919 | 0.09497637 | 16.028 | turquoise | 1013.82 | 987.167 | 0.9925542 | 0.0007704 | 16.682 | -- |
| CN158744 | turquoise | 1406.5 | 1405.6224 | 0.9749295 | 0.0047472  | 9.86   | turquoise | 1000.8  | 953.879 | 0.9850616 | 0.0021868 | 11.532 | -- |
| CN158770 | turquoise | 1570.6 | 1570.2451 | 0.9998803 | 1.57E-06   | 10.214 | turquoise | 785.286 | 738.742 | 0.9263456 | 0.0237288 | 15.746 | -- |
| CN158781 | turquoise | 1534.4 | 1533.8719 | 0.9952592 | 0.00039157 | 8.124  | turquoise | 711.276 | 695.854 | 0.9064439 | 0.033865  | 18.344 | -- |

|          |           |        |           |           |            |        |           |         |         |           |           |         |       |
|----------|-----------|--------|-----------|-----------|------------|--------|-----------|---------|---------|-----------|-----------|---------|-------|
| CN158983 | turquoise | 661.37 | 654.37735 | 0.7946307 | 0.1082142  | 0.464  | turquoise | 982.447 | 958.52  | 0.985326  | 0.0021291 | 1.706   | --    |
| CN159132 | turquoise | 1471.9 | 1471.5148 | 0.9816363 | 0.00297902 | 47.638 | turquoise | 977.723 | 903.604 | 0.9726281 | 0.0054138 | 51.418  | --    |
| CN160793 | turquoise | 1293.4 | 1292.1779 | 0.9571891 | 0.01056468 | 15.67  | turquoise | 939.696 | 912.804 | 0.9756388 | 0.0045477 | 11.026  | --    |
| CN161415 | turquoise | 1485.6 | 1485.051  | 0.9868506 | 0.00180648 | 2.44   | turquoise | 1009.15 | 982.918 | 0.9914494 | 0.0009479 | 10.642  | --    |
| CN161545 | turquoise | 1556.3 | 1555.8875 | 0.9983019 | 8.40E-05   | 45.494 | turquoise | 631.605 | 480.284 | 0.8222776 | 0.0875018 | 45.312  | --    |
| CN161554 | turquoise | 264.09 | 253.57089 | 0.5849578 | 0.30018552 | 18.886 | turquoise | 976.125 | 953.914 | 0.9838873 | 0.0024492 | 22.266  | --    |
| CN161683 | turquoise | 1509.8 | 1509.4403 | 0.9891782 | 0.00134921 | 2.248  | turquoise | 578.655 | 429.734 | 0.7954313 | 0.1075959 | 4.378   | 0     |
| CN161880 | turquoise | 905.33 | 902.73193 | 0.8762069 | 0.05130329 | 16.086 | turquoise | 647.725 | 507.375 | 0.8320152 | 0.0805344 | 29.53   | --    |
| CN162042 | turquoise | 1553.6 | 1553.1829 | 0.9965278 | 0.00024548 | 2.126  | turquoise | 1043.12 | 991.769 | 0.9953233 | 0.0003837 | 1.638   | --    |
| CN162073 | turquoise | 60.709 | 40.989662 | 0.2149701 | 0.72841451 | 95.3   | turquoise | 829.404 | 774.972 | 0.9352368 | 0.0195912 | 116.874 | --    |
| CN162090 | turquoise | 1552.3 | 1551.869  | 0.9976084 | 0.00014035 | 3.232  | turquoise | 982.015 | 949.301 | 0.9843732 | 0.0023395 | 5.2     | --    |
| CN162295 | turquoise | 1553.6 | 1553.1829 | 0.9965278 | 0.00024548 | 1.654  | turquoise | 460.504 | 406.165 | 0.7780741 | 0.1212363 | 2.322   | --    |
| CN162405 | turquoise | 298.54 | 292.61508 | 0.6469429 | 0.23803784 | 9.454  | turquoise | 1032.74 | 1001.27 | 0.9966274 | 0.000235  | 12.138  | --    |
| CN162710 | turquoise | 1518   | 1517.3843 | 0.9931786 | 0.00067562 | 10.098 | turquoise | 713.585 | 633.974 | 0.8944452 | 0.0405091 | 7.522   | --    |
| CN163671 | turquoise | 1364.3 | 1363.233  | 0.9680073 | 0.00683621 | 60.588 | turquoise | 1050.36 | 1007.29 | 0.9984115 | 7.60E-05  | 48.652  | 99    |
| CN163855 | turquoise | 1124.8 | 1123.0749 | 0.9220604 | 0.02581234 | 29.838 | turquoise | 503.199 | 489.001 | 0.8207504 | 0.0886105 | 26.968  | --    |
| CN164027 | turquoise | 1380.3 | 1379.5537 | 0.9731156 | 0.00527017 | 47.332 | turquoise | 690.601 | 663.01  | 0.8949332 | 0.0402315 | 54.226  | --    |
| CN164462 | turquoise | 1499.1 | 1498.5237 | 0.9905458 | 0.00110192 | 2.838  | turquoise | 1020.31 | 991.668 | 0.9937878 | 0.0005872 | 4.018   | --    |
| CN165181 | turquoise | 1553.6 | 1553.1829 | 0.9965278 | 0.00024548 | 3.024  | turquoise | 1021.62 | 993.743 | 0.9943055 | 0.0005154 | 18.71   | --    |
| CN165208 | turquoise | 1415.5 | 1414.9781 | 0.9739328 | 0.00503235 | 2.786  | turquoise | 1005.9  | 980.437 | 0.9908699 | 0.0010458 | 2.886   | --    |
| CN165377 | turquoise | 1028.9 | 1026.1668 | 0.9012552 | 0.0366915  | 10.746 | turquoise | 1040.19 | 1007.77 | 0.9981063 | 9.89E-05  | 11.768  | --    |
| CN165379 | turquoise | 151.45 | 132.87163 | 0.4615615 | 0.43391156 | 5.616  | turquoise | 969.208 | 944.381 | 0.9815642 | 0.0029965 | 6.446   | --    |
| CN166224 | turquoise | 1516   | 1515.4927 | 0.9924023 | 0.00079408 | 0.836  | turquoise | 1031.75 | 999.238 | 0.995978  | 0.000306  | 2.98    | --    |
| AJ657682 | turquoise | 1543.5 | 1543.0265 | 0.9965136 | 0.00024698 | 7.616  | turquoise | 525.327 | 441.926 | 0.8147539 | 0.0930049 | 8.294   | --    |
| AJ680676 | turquoise | 1553.6 | 1553.1829 | 0.9965278 | 0.00024548 | 0.566  | turquoise | 1005.52 | 980.098 | 0.9907845 | 0.0010605 | 1.904   | --    |
| CO938694 | turquoise | 1547.5 | 1547.1368 | 0.995807  | 0.00032572 | 3.728  | turquoise | 1040.96 | 1006.78 | 0.9979646 | 0.0001102 | 2.228   | --    |
| CJ008156 | turquoise | 175.55 | 140.6405  | 0.406152  | 0.49746308 | 29.64  | turquoise | 981.283 | 938.781 | 0.9807581 | 0.0031948 | 39.95   | 99    |
| CJ008440 | turquoise | 64.214 | 39.017311 | 0.1956954 | 0.75243254 | 5.118  | turquoise | 575.368 | 551.062 | 0.8492514 | 0.0686501 | 4.69    | 0     |
| CJ008695 | turquoise | 1277.9 | 1276.7971 | 0.9548638 | 0.01143297 | 18.748 | turquoise | 1041.15 | 1003.83 | 0.9976291 | 0.0001385 | 31.76   | 0     |
| CJ010524 | turquoise | 1012.2 | 1009.9168 | 0.9019098 | 0.03633099 | 12.592 | turquoise | 989.739 | 964.681 | 0.9869998 | 0.0017759 | 11.53   | --    |
| CJ011443 | turquoise | 1489.5 | 1488.8769 | 0.9871542 | 0.00174435 | 18.65  | turquoise | 427.635 | 323.693 | 0.7365938 | 0.1557119 | 30.434  | --    |
| CJ012466 | turquoise | 1539.4 | 1538.9549 | 0.996081  | 0.00029434 | 3.342  | turquoise | 569.805 | 479.602 | 0.8267719 | 0.0842639 | 5.23    | 0.522 |
| CJ012912 | turquoise | 1003.7 | 1000.9762 | 0.8949061 | 0.04024691 | 10.992 | turquoise | 778.99  | 749.356 | 0.9247963 | 0.0244755 | 21.358  | --    |
| CJ024171 | turquoise | 1317.4 | 1316.1596 | 0.9591912 | 0.00983532 | 283.24 | turquoise | 1034.78 | 983.422 | 0.9928463 | 0.0007255 | 132.862 | --    |
| CJ027205 | turquoise | 626.18 | 616.67078 | 0.774209  | 0.12433937 | 31.142 | turquoise | 723.554 | 674.23  | 0.9001544 | 0.0373004 | 43.52   | 99    |
| CJ032354 | turquoise | 1350.8 | 1349.7353 | 0.966925  | 0.00718484 | 11.776 | turquoise | 946.077 | 857.253 | 0.9596785 | 0.0096604 | 12.69   | 0     |



|          |           |        |           |           |            |         |           |         |         |           |           |         |    |
|----------|-----------|--------|-----------|-----------|------------|---------|-----------|---------|---------|-----------|-----------|---------|----|
| CJ033142 | turquoise | 1422.8 | 1422.1764 | 0.9771778 | 0.00412457 | 14.64   | turquoise | 845.441 | 779.136 | 0.9353893 | 0.0195225 | 22.156  | -- |
| CJ020894 | turquoise | 1445.4 | 1444.6927 | 0.982652  | 0.00273575 | 602.086 | turquoise | 973.159 | 901.104 | 0.9722407 | 0.0055288 | 381.264 | 99 |
| DN100878 | turquoise | 1454.3 | 1453.8331 | 0.9839047 | 0.0024453  | 2.99    | turquoise | 954.589 | 933.11  | 0.9787055 | 0.0037183 | 7.016   | 99 |
| DN100934 | turquoise | 1548   | 1547.5849 | 0.996272  | 0.00027309 | 14.954  | turquoise | 1014.25 | 945.671 | 0.9835552 | 0.0025252 | 15.234  | -- |
| DN100970 | turquoise | 687.59 | 679.41797 | 0.798318  | 0.1053754  | 8.03    | turquoise | 1032.72 | 982.766 | 0.9928786 | 0.0007206 | 6.17    | -- |
| DN101534 | turquoise | 1553.6 | 1553.1829 | 0.9965278 | 0.00024548 | 1.558   | turquoise | 870.325 | 757.635 | 0.9301485 | 0.0219277 | 4.016   | -- |
| DN101612 | turquoise | 952.23 | 951.3044  | 0.8892822 | 0.04348234 | 9.674   | turquoise | 1012.63 | 949.858 | 0.9846586 | 0.0022758 | 15.752  | 99 |
| DN101643 | turquoise | 1408.6 | 1408.1304 | 0.9723009 | 0.00551087 | 17.958  | turquoise | 978.106 | 933.261 | 0.9820773 | 0.0028726 | 23.3    | -- |
| DN102328 | turquoise | 1522.3 | 1521.8471 | 0.9925652 | 0.00076869 | 39.258  | turquoise | 989.336 | 915.362 | 0.9762133 | 0.0043881 | 25.998  | -- |
| DN102330 | turquoise | 1553.6 | 1553.1829 | 0.9965278 | 0.00024548 | 0.85    | turquoise | 1015.27 | 988.541 | 0.9929221 | 0.0007141 | 2.234   | 0  |
| DN102924 | turquoise | 1553.6 | 1553.1829 | 0.9965278 | 0.00024548 | 1.748   | turquoise | 1034.95 | 1003.81 | 0.9969985 | 0.0001973 | 3.154   | -- |
| DN103647 | turquoise | 1526   | 1525.6204 | 0.9915673 | 0.0009284  | 10.994  | turquoise | 996.286 | 952.419 | 0.984908  | 0.0022206 | 20.666  | -- |
| DN104450 | turquoise | 1040.7 | 1038.8614 | 0.8977354 | 0.03864964 | 20.092  | turquoise | 858.546 | 831.103 | 0.9509489 | 0.0129445 | 13.342  | -- |
| DN106021 | turquoise | 1529.6 | 1529.265  | 0.9928746 | 0.00072125 | 1.62    | turquoise | 1015.27 | 988.541 | 0.9929221 | 0.0007141 | 3.79    | -- |
| DN106213 | turquoise | 1554.2 | 1553.8155 | 0.9971144 | 0.000186   | 10.436  | turquoise | 1011.6  | 942.889 | 0.9832998 | 0.0025842 | 13.436  | -- |
| DN106221 | turquoise | 1529   | 1528.5408 | 0.9949014 | 0.00043669 | 9.66    | turquoise | 1034.81 | 1003.78 | 0.9970411 | 0.0001931 | 23.12   | -- |
| DN106224 | turquoise | 643.35 | 640.30353 | 0.8002017 | 0.103934   | 5.8     | turquoise | 879.291 | 856.38  | 0.9597112 | 0.0096487 | 11.316  | -- |
| DN106274 | turquoise | 1546.8 | 1546.4126 | 0.9947691 | 0.0004538  | 8.014   | turquoise | 511.579 | 353.285 | 0.7539913 | 0.1409438 | 16.42   | -- |
| DN106323 | turquoise | 1259.7 | 1258.6201 | 0.9460117 | 0.01493602 | 3.636   | turquoise | 1020.1  | 968.288 | 0.9896512 | 0.0012618 | 7.1     | -- |
| DN106451 | turquoise | 1140   | 1137.9081 | 0.9253845 | 0.0241911  | 9.872   | turquoise | 959.849 | 925.303 | 0.9777316 | 0.0039757 | 10.366  | -- |
| DN106928 | turquoise | 1552   | 1551.5203 | 0.9975876 | 0.00014218 | 27.456  | turquoise | 1047.91 | 999.245 | 0.9968337 | 0.0002138 | 36.45   | -- |
| DN107015 | turquoise | 1523.1 | 1522.7085 | 0.9914403 | 0.00094942 | 2.528   | turquoise | 806.968 | 769.259 | 0.9345915 | 0.0198828 | 3.104   | 99 |
| DN107136 | turquoise | 1425.9 | 1425.0967 | 0.9782501 | 0.00383794 | 13.172  | turquoise | 898.866 | 854.772 | 0.9600265 | 0.0095361 | 14.614  | -- |
| DN107769 | turquoise | 1554.2 | 1553.7791 | 0.9976348 | 0.00013803 | 20.81   | turquoise | 1038.85 | 991.402 | 0.9945691 | 0.0004801 | 50.696  | -- |
| DN107929 | turquoise | 1272.8 | 1271.5635 | 0.9510085 | 0.01292103 | 40.99   | turquoise | 843.261 | 787.204 | 0.9391372 | 0.017859  | 35.792  | -- |
| DN107937 | turquoise | 1552.5 | 1552.0854 | 0.9965244 | 0.00024584 | 24.928  | turquoise | 1027.94 | 997.786 | 0.9954366 | 0.0003698 | 27.472  | -- |
| DN108486 | turquoise | 536.58 | 531.79147 | 0.759105  | 0.13668607 | 46.946  | turquoise | 1037.69 | 1006.01 | 0.9976379 | 0.0001378 | 41.374  | -- |
| DN108517 | turquoise | 602.23 | 598.22134 | 0.7699125 | 0.12781607 | 6.894   | turquoise | 886.254 | 864.644 | 0.9594834 | 0.0097303 | 15.512  | -- |
| DN108763 | turquoise | 403.47 | 398.88086 | 0.7116997 | 0.17756855 | 13.504  | turquoise | 907.525 | 817.501 | 0.9477441 | 0.0142266 | 20.612  | 0  |
| DN109089 | turquoise | 1554.6 | 1554.2035 | 0.9981356 | 9.66E-05   | 32.59   | turquoise | 944.738 | 920.462 | 0.9754199 | 0.004609  | 44.174  | -- |
| DN109161 | turquoise | 1228.8 | 1227.3208 | 0.9446887 | 0.01548526 | 18.248  | turquoise | 243.344 | 159.687 | 0.5650165 | 0.3209579 | 20.664  | -- |
| DN110430 | turquoise | 1571.7 | 1571.315  | 0.9998077 | 3.20E-06   | 5.302   | turquoise | 1017.3  | 979.727 | 0.9923672 | 0.0007996 | 16.342  | -- |
| DN110465 | turquoise | 1250.3 | 1248.9437 | 0.9470805 | 0.01449703 | 6.494   | turquoise | 1033.73 | 1001.48 | 0.9964477 | 0.000254  | 6.514   | -- |
| DN110896 | turquoise | 92.523 | 44.490624 | 0.21269   | 0.73125052 | 21.336  | turquoise | 1021.08 | 987.054 | 0.9932511 | 0.0006649 | 25.238  | -- |
| DN110907 | turquoise | 1529.2 | 1528.712  | 0.9946497 | 0.00046941 | 15.036  | turquoise | 1046.72 | 1007.43 | 0.9982633 | 8.69E-05  | 18.056  | -- |
| DN111558 | turquoise | 1546   | 1545.5745 | 0.9965623 | 0.00024183 | 18.534  | turquoise | 871.934 | 796.589 | 0.9413317 | 0.0169075 | 42.974  | -- |

|          |           |        |           |           |            |         |           |         |         |           |           |         |      |
|----------|-----------|--------|-----------|-----------|------------|---------|-----------|---------|---------|-----------|-----------|---------|------|
| DN112204 | turquoise | 1522.1 | 1521.7206 | 0.9906734 | 0.00107972 | 11.02   | turquoise | 882.019 | 792.535 | 0.9415665 | 0.0168067 | 10.272  | --   |
| DN112212 | turquoise | 1466.2 | 1465.6521 | 0.9810204 | 0.00312986 | 51.358  | turquoise | 736.497 | 665.677 | 0.90046   | 0.037131  | 101.444 | --   |
| DN112252 | turquoise | 902.81 | 900.75892 | 0.880393  | 0.04875505 | 11.388  | turquoise | 641.146 | 583.994 | 0.8653154 | 0.0581215 | 10.956  | --   |
| DN112314 | turquoise | 1489.9 | 1489.2792 | 0.9888743 | 0.00140636 | 26.722  | turquoise | 862.235 | 756.618 | 0.9291571 | 0.0223928 | 22.4    | --   |
| DN112323 | turquoise | 1553.6 | 1553.1829 | 0.9965278 | 0.00024548 | 1.558   | turquoise | 948.414 | 927.812 | 0.9771766 | 0.0041249 | 3.768   | --   |
| DN112991 | turquoise | 1546   | 1545.5777 | 0.99707   | 0.0001903  | 28.528  | turquoise | 858.338 | 759.99  | 0.9308804 | 0.0215864 | 25.18   | --   |
| DN112996 | turquoise | 90.848 | 65.255491 | 0.2929267 | 0.63243874 | 3.322   | turquoise | 996.836 | 967.146 | 0.9879563 | 0.0015838 | 4.44    | --   |
| DN113159 | turquoise | 933.99 | 931.667   | 0.8745902 | 0.05229834 | 42.98   | turquoise | 763.159 | 672.587 | 0.9032407 | 0.0356014 | 37.108  | --   |
| DN113688 | turquoise | 1387.7 | 1386.8407 | 0.973127  | 0.00526683 | 5.316   | turquoise | 677.095 | 628.185 | 0.8947852 | 0.0403157 | 2.108   | --   |
| DN114373 | turquoise | 432.54 | 413.64358 | 0.6708819 | 0.21511185 | 16.35   | turquoise | 1034.78 | 993.356 | 0.995611  | 0.0003488 | 8.624   | 0.42 |
| DN114544 | turquoise | 1343.4 | 1342.3383 | 0.9623219 | 0.00872965 | 19.36   | turquoise | 964.525 | 939.432 | 0.9808335 | 0.0031761 | 26.34   | --   |
| DN114642 | turquoise | 1557.6 | 1557.175  | 0.9974605 | 0.00015356 | 5.958   | turquoise | 680.754 | 548.164 | 0.8557909 | 0.0642981 | 10.612  | --   |
| DN115031 | turquoise | 1538   | 1537.5205 | 0.9960159 | 0.00030169 | 7.944   | turquoise | 1006.62 | 953.383 | 0.9853678 | 0.00212   | 12.938  | --   |
| DN115327 | turquoise | 1553.6 | 1553.1829 | 0.9965278 | 0.00024548 | 0.708   | turquoise | 1015.27 | 988.541 | 0.9929221 | 0.0007141 | 2.842   | --   |
| DN115687 | turquoise | 1460.5 | 1460.0059 | 0.9800097 | 0.00338264 | 8.088   | turquoise | 523.35  | 510.514 | 0.8442925 | 0.0720088 | 20.892  | --   |
| DN115744 | turquoise | 1294.6 | 1293.5713 | 0.9588391 | 0.00996236 | 220.986 | turquoise | 282.725 | 189.702 | 0.6068105 | 0.2778422 | 244.998 | --   |
| DN115925 | turquoise | 1553.6 | 1553.1829 | 0.9965278 | 0.00024548 | 1.322   | turquoise | 1015.27 | 988.541 | 0.9929221 | 0.0007141 | 9.542   | --   |
| DN116041 | turquoise | 123.49 | 106.71025 | 0.404389  | 0.49951521 | 75.588  | turquoise | 749.697 | 726.408 | 0.9171355 | 0.0282757 | 61.518  | --   |
| DN117853 | turquoise | 1514.2 | 1513.7027 | 0.9917086 | 0.00090518 | 15.22   | turquoise | 1043.44 | 992.686 | 0.9950321 | 0.00042   | 9.23    | --   |
| DN119461 | turquoise | 1488.1 | 1487.6905 | 0.9855861 | 0.00207283 | 5.674   | turquoise | 976.139 | 939.029 | 0.9817848 | 0.002943  | 9.24    | --   |
| DN120179 | turquoise | 208.79 | 149.37756 | 0.387311  | 0.51948307 | 41.082  | turquoise | 616.228 | 593.811 | 0.8709179 | 0.0545808 | 31.488  | --   |
| DN120816 | turquoise | 1503.3 | 1502.8406 | 0.988426  | 0.00149211 | 2.25    | turquoise | 933.904 | 859.871 | 0.9606369 | 0.0093194 | 7.548   | --   |
| DN121344 | turquoise | 1417.7 | 1416.8222 | 0.9782385 | 0.00384101 | 10.04   | turquoise | 869.911 | 793.013 | 0.9419276 | 0.0166521 | 9.46    | --   |
| DN121454 | turquoise | 134.41 | 109.70519 | 0.3972119 | 0.50788728 | 21.988  | turquoise | 948.719 | 924.34  | 0.9766256 | 0.0042748 | 25.2    | --   |
| DN121650 | turquoise | 1553.6 | 1553.1829 | 0.9965278 | 0.00024548 | 0.944   | turquoise | 910.125 | 889.809 | 0.9671628 | 0.0071078 | 3.39    | --   |
| DN121967 | turquoise | 1532.6 | 1532.2001 | 0.993566  | 0.00061892 | 2.666   | turquoise | 1026.32 | 997.48  | 0.9953031 | 0.0003861 | 5.26    | 0    |
| DN122834 | turquoise | 1458.8 | 1458.0384 | 0.9837776 | 0.00247427 | 26.722  | turquoise | 880.163 | 862.167 | 0.9589136 | 0.0099354 | 26.618  | 99   |
| DN122987 | turquoise | 1523.2 | 1522.7981 | 0.9918907 | 0.00087554 | 2.898   | turquoise | 71.2451 | 48.7239 | 0.3714506 | 0.5381673 | 2.366   | --   |
| DN123452 | turquoise | 1553.6 | 1553.1829 | 0.9965278 | 0.00024548 | 9.92    | turquoise | 1054.44 | 1012.46 | 0.999748  | 4.80E-06  | 0.998   | 0    |
| DN123882 | turquoise | 1553.6 | 1553.1829 | 0.9965278 | 0.00024548 | 0.33    | turquoise | 1015.27 | 988.541 | 0.9929221 | 0.0007141 | 1.76    | --   |
| DN124029 | turquoise | 1555.7 | 1555.2403 | 0.9978732 | 0.0001177  | 3.596   | turquoise | 784.023 | 655.854 | 0.8945578 | 0.040445  | 3.19    | --   |
| DN125959 | turquoise | 1530.1 | 1529.7569 | 0.9922472 | 0.00081849 | 1.7     | turquoise | 1009.48 | 982.64  | 0.9914626 | 0.0009457 | 5.518   | --   |
| DN126017 | turquoise | 1481.9 | 1481.2504 | 0.9867362 | 0.00183008 | 11.218  | turquoise | 439.723 | 336.881 | 0.7514878 | 0.1430423 | 10.506  | --   |
| DN126098 | turquoise | 562.61 | 555.09203 | 0.7582491 | 0.13739598 | 14.758  | turquoise | 1047.6  | 999.957 | 0.9968363 | 0.0002135 | 11.356  | --   |
| DN126130 | turquoise | 1527.6 | 1527.0431 | 0.9943492 | 0.00050948 | 3.744   | turquoise | 750.579 | 652.971 | 0.8957774 | 0.0397528 | 3.606   | --   |
| DN126995 | turquoise | 1093.8 | 1092.0884 | 0.9105065 | 0.03170321 | 9.378   | turquoise | 790.574 | 770.341 | 0.9359079 | 0.0192895 | 10.14   | --   |

|          |           |        |           |           |            |        |           |         |         |           |           |         |    |
|----------|-----------|--------|-----------|-----------|------------|--------|-----------|---------|---------|-----------|-----------|---------|----|
| DN128230 | turquoise | 1521.2 | 1520.8275 | 0.9906063 | 0.00109138 | 20.206 | turquoise | 385.178 | 283.395 | 0.7039819 | 0.1845097 | 25.742  | -- |
| DN129825 | turquoise | 1554.1 | 1553.6451 | 0.9979797 | 0.00010898 | 25.116 | turquoise | 861.203 | 800.45  | 0.9468004 | 0.0146117 | 28.896  | -- |
| DN133913 | turquoise | 1516.6 | 1516.1821 | 0.9908592 | 0.00104765 | 11.824 | turquoise | 778.487 | 758.105 | 0.9269565 | 0.0234364 | 7.624   | -- |
| DN134319 | turquoise | 906.25 | 903.98765 | 0.8751874 | 0.05193007 | 9.786  | turquoise | 1012.69 | 979.131 | 0.9910322 | 0.0010181 | 16.304  | -- |
| DN134561 | turquoise | 1483.7 | 1483.3254 | 0.9842742 | 0.00236171 | 1.796  | turquoise | 1029.59 | 997.644 | 0.9958234 | 0.0003238 | 2.27    | -- |
| CR939665 | turquoise | 1315.6 | 1314.6079 | 0.9586726 | 0.01002259 | 19.336 | turquoise | 862.184 | 805.653 | 0.9457863 | 0.0150291 | 24.58   | 0  |
| CR940070 | turquoise | 1340.2 | 1339.5584 | 0.9601606 | 0.00948836 | 2.07   | turquoise | 451.645 | 333.17  | 0.7398835 | 0.1528865 | 5.71    | -- |
| CR939318 | turquoise | 1530.4 | 1529.9932 | 0.9929289 | 0.00071302 | 16.296 | turquoise | 924.895 | 889.123 | 0.96936   | 0.0064086 | 23.462  | -- |
| BW961291 | turquoise | 1549   | 1548.5525 | 0.9974887 | 0.00015101 | 2.928  | turquoise | 692.417 | 643.16  | 0.8922502 | 0.041765  | 7.066   | -- |
| BW960629 | turquoise | 1436.4 | 1435.9337 | 0.9812561 | 0.00307185 | 4.584  | turquoise | 268.213 | 181.399 | 0.5992298 | 0.2855417 | 6.868   | 0  |
| BW973016 | turquoise | 1512   | 1511.542  | 0.9886226 | 0.0014543  | 15.856 | turquoise | 1015.24 | 950.123 | 0.9845278 | 0.0023049 | 22.07   | -- |
| BW967903 | turquoise | 329.29 | 305.54649 | 0.5978187 | 0.28698111 | 12.884 | turquoise | 1050.65 | 1009.69 | 0.9989135 | 4.30E-05  | 12.976  | -- |
| BW979660 | turquoise | 1436.7 | 1436.207  | 0.9773473 | 0.0040788  | 4.73   | turquoise | 192.469 | 156.297 | 0.5643318 | 0.3216774 | 20.184  | -- |
| BW980850 | turquoise | 1404.7 | 1404.098  | 0.9737138 | 0.00509571 | 5.916  | turquoise | 812.906 | 779.551 | 0.9358962 | 0.0192947 | 18.036  | 99 |
| BW980990 | turquoise | 820.88 | 817.33839 | 0.8524114 | 0.06653608 | 27.818 | turquoise | 815.234 | 740.447 | 0.9266158 | 0.0235993 | 30.178  | -- |
| BW982750 | turquoise | 1491.1 | 1490.5129 | 0.9887011 | 0.00143931 | 6.452  | turquoise | 788.551 | 673.8   | 0.9030011 | 0.0357324 | 7.512   | -- |
| AJ951006 | turquoise | 1023.3 | 1021.2069 | 0.9007236 | 0.03698515 | 29.472 | turquoise | 922.219 | 873.597 | 0.9642116 | 0.0080835 | 32.302  | -- |
| AJ952587 | turquoise | 1504.9 | 1504.444  | 0.9883684 | 0.00150326 | 13.682 | turquoise | 664.546 | 594.986 | 0.8745272 | 0.0523372 | 17.204  | -- |
| AJ953775 | turquoise | 1503.3 | 1502.6652 | 0.9902526 | 0.00115354 | 17.356 | turquoise | 937.427 | 917.589 | 0.9741277 | 0.0049761 | 12.136  | -- |
| AJ956532 | turquoise | 1301.6 | 1300.3145 | 0.9562573 | 0.01090994 | 1.716  | turquoise | 1015.27 | 988.541 | 0.9929221 | 0.0007141 | 2.098   | -- |
| AJ957377 | turquoise | 1546.8 | 1546.3785 | 0.9958346 | 0.00032251 | 4.22   | turquoise | 985.395 | 913.059 | 0.9752718 | 0.0046506 | 2.606   | -- |
| AJ957942 | turquoise | 1478.8 | 1478.3341 | 0.9839216 | 0.00244145 | 6.936  | turquoise | 499.898 | 448.602 | 0.8021979 | 0.1024131 | 6.156   | -- |
| AJ958416 | turquoise | 1448.2 | 1447.7255 | 0.9796771 | 0.00346724 | 6.4    | turquoise | 981.953 | 953.383 | 0.9842154 | 0.0023749 | 12.402  | -- |
| AJ958520 | turquoise | 1571.6 | 1571.1741 | 0.9998108 | 3.12E-06   | 2.016  | turquoise | 653.316 | 634.16  | 0.8937118 | 0.0409273 | 3.526   | -- |
| AJ958543 | turquoise | 1098.5 | 1096.6154 | 0.9210952 | 0.02628943 | 29.068 | turquoise | 991.838 | 935.963 | 0.9804995 | 0.0032593 | 33.092  | -- |
| AJ959966 | turquoise | 888.97 | 884.36412 | 0.8630826 | 0.05955182 | 10.45  | turquoise | 900.697 | 855.108 | 0.9584816 | 0.0100919 | 6.714   | -- |
| AJ960294 | turquoise | 1553.6 | 1553.1829 | 0.9965278 | 0.00024548 | 0.708  | turquoise | 1015.27 | 988.541 | 0.9929221 | 0.0007141 | 1.962   | -- |
| AJ960623 | turquoise | 878.02 | 876.81231 | 0.8732587 | 0.05312238 | 5.896  | turquoise | 207.015 | 117.106 | 0.4989375 | 0.3921742 | 15.076  | -- |
| AJ960641 | turquoise | 1239.1 | 1238.3067 | 0.9397162 | 0.01760631 | 6.12   | turquoise | 1039.33 | 1002.13 | 0.997413  | 0.0001579 | 14.22   | -- |
| AJ962199 | turquoise | 1260.6 | 1259.3289 | 0.9514861 | 0.0127335  | 22.592 | turquoise | 743.283 | 632.007 | 0.8856711 | 0.0456012 | 18.786  | -- |
| AJ962658 | turquoise | 1490   | 1489.3942 | 0.9893914 | 0.00130957 | 7.502  | turquoise | 455.825 | 352.066 | 0.7461256 | 0.1475673 | 10.958  | -- |
| AJ964270 | turquoise | 1495.1 | 1494.6735 | 0.986069  | 0.0019697  | 9.43   | turquoise | 743.249 | 595.495 | 0.871428  | 0.0542619 | 12.958  | -- |
| AJ964761 | turquoise | 1566.3 | 1565.9012 | 0.9990226 | 3.67E-05   | 3.754  | turquoise | 162.469 | 110.645 | 0.518596  | 0.3706265 | 10.032  | -- |
| AJ964869 | turquoise | 1545.2 | 1544.6895 | 0.9964311 | 0.00025581 | 4.524  | turquoise | 1043.49 | 994.386 | 0.9954532 | 0.0003678 | 10.446  | -- |
| AJ944251 | turquoise | 202.83 | 195.97071 | 0.5458646 | 0.34123473 | 95.154 | turquoise | 535.544 | 496.753 | 0.8404449 | 0.0746488 | 115.204 | -- |
| AJ944277 | turquoise | 110.47 | 84.942829 | 0.3223446 | 0.59680073 | 7.47   | turquoise | 1046.41 | 998.672 | 0.9965247 | 0.0002458 | 7.662   | -- |

|          |           |        |           |           |            |        |           |         |         |           |           |        |       |
|----------|-----------|--------|-----------|-----------|------------|--------|-----------|---------|---------|-----------|-----------|--------|-------|
| AJ946247 | turquoise | 339.99 | 312.36099 | 0.5975096 | 0.28729662 | 32.958 | turquoise | 277.022 | 245.023 | 0.6671998 | 0.2185963 | 21.628 | --    |
| AJ946071 | turquoise | 1558.8 | 1558.461  | 0.9970919 | 0.00018817 | 15.098 | turquoise | 1020.88 | 988.66  | 0.9934944 | 0.0006293 | 18.658 | --    |
| DV224291 | turquoise | 1438.9 | 1438.4916 | 0.9786082 | 0.00374374 | 5.868  | turquoise | 901.978 | 876.774 | 0.9644922 | 0.007989  | 8.192  | --    |
| DV225307 | turquoise | 1212.5 | 1211.3519 | 0.9345468 | 0.01990307 | 82.618 | turquoise | 590.401 | 489.145 | 0.8251214 | 0.0854487 | 91.36  | --    |
| DV225844 | turquoise | 925.36 | 922.61204 | 0.8824093 | 0.04754238 | 74.128 | turquoise | 1049.88 | 999.963 | 0.9971429 | 0.0001832 | 76.636 | --    |
| DV226023 | turquoise | 1571   | 1570.5891 | 0.9995834 | 1.02E-05   | 1.454  | turquoise | 804.493 | 774.427 | 0.9389884 | 0.0179241 | 2.198  | 0.072 |
| DV226542 | turquoise | 1197.7 | 1196.5223 | 0.9313138 | 0.02138513 | 31.94  | turquoise | 1037.39 | 977.339 | 0.9915953 | 0.0009238 | 39.3   | --    |
| DV227158 | turquoise | 1502.4 | 1501.8692 | 0.9891808 | 0.00134873 | 8.102  | turquoise | 270.547 | 237.29  | 0.6865559 | 0.2004562 | 17.892 | --    |
| DV227358 | turquoise | 550.24 | 549.28328 | 0.7722046 | 0.12595776 | 7.366  | turquoise | 1048.92 | 1011.37 | 0.9992398 | 2.52E-05  | 9.856  | --    |
| CV868318 | turquoise | 1289.1 | 1288.0367 | 0.9577568 | 0.01035615 | 4.056  | turquoise | 940.223 | 911.829 | 0.9732515 | 0.0052304 | 6.14   | 99    |
| CV873038 | turquoise | 1451.3 | 1450.7303 | 0.9815934 | 0.00298946 | 8.624  | turquoise | 356.501 | 275.551 | 0.7072816 | 0.1815327 | 8.376  | --    |
| CV873720 | turquoise | 1549.4 | 1548.9605 | 0.9968621 | 0.0002109  | 1.738  | turquoise | 580.241 | 440.699 | 0.7995166 | 0.1044575 | 2.496  | --    |
| CX058016 | turquoise | 1045.1 | 1043.2111 | 0.904088  | 0.03513941 | 7.08   | turquoise | 841.897 | 811.1   | 0.9503846 | 0.0131674 | 10.94  | 99    |
| CX065124 | turquoise | 1369   | 1368.1323 | 0.9688915 | 0.00655564 | 55.188 | turquoise | 938.139 | 861.303 | 0.9617333 | 0.0089342 | 59.062 | --    |
| DY406486 | turquoise | 51.3   | 37.767928 | 0.2324834 | 0.70668141 | 4.084  | turquoise | 1046.12 | 997.03  | 0.9960843 | 0.000294  | 5.23   | --    |
| DY407195 | turquoise | 1553.6 | 1553.1829 | 0.9965278 | 0.00024548 | 4.298  | turquoise | 1015.27 | 988.541 | 0.9929221 | 0.0007141 | 28.556 | --    |
| DY407390 | turquoise | 1458.7 | 1458.2434 | 0.9813831 | 0.00304074 | 1.034  | turquoise | 1002.06 | 977.188 | 0.9899453 | 0.0012085 | 3.97   | --    |
| DY411095 | turquoise | 1446.7 | 1446.1968 | 0.9779028 | 0.00393002 | 0.708  | turquoise | 1009.6  | 983.741 | 0.9917028 | 0.0009061 | 2.85   | --    |
| DY415087 | turquoise | 1294.3 | 1293.3544 | 0.9586373 | 0.01003539 | 4.96   | turquoise | 551.938 | 446.818 | 0.8078522 | 0.0981422 | 5.724  | --    |
| DY416230 | turquoise | 1464.5 | 1463.8416 | 0.9849866 | 0.00220329 | 6.066  | turquoise | 451.848 | 365.988 | 0.7609276 | 0.1351779 | 5.462  | 99    |
| DY417568 | turquoise | 996.92 | 994.99611 | 0.8990785 | 0.03789859 | 2.552  | turquoise | 1052.78 | 1012.27 | 0.9996412 | 8.16E-06  | 6.196  | --    |
| DY418401 | turquoise | 1456.6 | 1456.0958 | 0.9795812 | 0.00349176 | 5.36   | turquoise | 1024.3  | 985.629 | 0.99353   | 0.0006241 | 10.15  | --    |
| DY418469 | turquoise | 1553.6 | 1553.1829 | 0.9965278 | 0.00024548 | 1.322  | turquoise | 1015.27 | 988.541 | 0.9929221 | 0.0007141 | 7.578  | --    |
| DY418643 | turquoise | 1456.9 | 1456.1648 | 0.9832958 | 0.00258513 | 2.6    | turquoise | 1017.71 | 986.106 | 0.9926075 | 0.0007621 | 7.138  | --    |
| DY418677 | turquoise | 1531   | 1530.5309 | 0.9947173 | 0.00046055 | 1.808  | turquoise | 798.22  | 665.489 | 0.898266  | 0.0383523 | 2.102  | --    |
| DY419075 | turquoise | 1536   | 1535.4727 | 0.9956081 | 0.00034917 | 1.312  | turquoise | 1011.49 | 985.052 | 0.9919962 | 0.0008585 | 3.97   | --    |
| DY419287 | turquoise | 1411.5 | 1410.7455 | 0.9756251 | 0.0045515  | 2.336  | turquoise | 1046.74 | 1007.64 | 0.9983386 | 8.13E-05  | 3.542  | 0     |
| DY419575 | turquoise | 1553.6 | 1553.1829 | 0.9965278 | 0.00024548 | 0.426  | turquoise | 1009.43 | 983.5   | 0.9915942 | 0.000924  | 4.392  | --    |
| DY420354 | turquoise | 1553.6 | 1553.1829 | 0.9965278 | 0.00024548 | 0.188  | turquoise | 1015.27 | 988.541 | 0.9929221 | 0.0007141 | 1.894  | 0     |
| DY422193 | turquoise | 1508.8 | 1508.4247 | 0.9880127 | 0.00157265 | 2.324  | turquoise | 1010.51 | 983.856 | 0.99182   | 0.000887  | 6.49   | --    |
| DY424276 | turquoise | 1387.4 | 1386.5304 | 0.9696636 | 0.00631385 | 37.018 | turquoise | 289.378 | 245.742 | 0.678806  | 0.2076664 | 26.262 | --    |
| DY425355 | turquoise | 346.98 | 339.2073  | 0.6629751 | 0.22261311 | 11.182 | turquoise | 776.29  | 744.248 | 0.9264616 | 0.0236731 | 10.906 | --    |
| DY426016 | turquoise | 1415.6 | 1414.8168 | 0.9759844 | 0.00445146 | 1.58   | turquoise | 1047.38 | 1010.18 | 0.9988975 | 4.39E-05  | 5.284  | --    |
| DY426090 | turquoise | 903.02 | 900.40147 | 0.8763747 | 0.05120037 | 25.532 | turquoise | 578.092 | 494.911 | 0.8287015 | 0.0828854 | 31.436 | --    |
| DY426166 | turquoise | 1172.4 | 1171.6481 | 0.9371956 | 0.01871476 | 14.25  | turquoise | 849.652 | 802.33  | 0.946778  | 0.0146209 | 16.632 | --    |
| DY428656 | turquoise | 1465.5 | 1464.7806 | 0.9857459 | 0.00203851 | 28.438 | turquoise | 725.184 | 707.525 | 0.9109739 | 0.0314575 | 32.214 | --    |

|          |      |           |        |           |           |            |         |           |         |         |           |           |        |       |
|----------|------|-----------|--------|-----------|-----------|------------|---------|-----------|---------|---------|-----------|-----------|--------|-------|
| DY432545 |      | turquoise | 1244.3 | 1243.6201 | 0.9487412 | 0.01382354 | 1.902   | turquoise | 1019.45 | 991.76  | 0.9937797 | 0.0005884 | 3.574  | --    |
| DY432870 |      | turquoise | 1553.6 | 1553.1829 | 0.9965278 | 0.00024548 | 0.33    | turquoise | 1015.27 | 988.541 | 0.9929221 | 0.0007141 | 2.842  | --    |
| DY434291 |      | turquoise | 1559.7 | 1559.2327 | 0.9987209 | 5.49E-05   | 4.676   | turquoise | 976.827 | 895.826 | 0.970339  | 0.0061048 | 8.168  | --    |
| DY434551 |      | turquoise | 1539.5 | 1539.0862 | 0.9939587 | 0.00056316 | 3.392   | turquoise | 433.503 | 358.023 | 0.763529  | 0.1330339 | 5.236  | --    |
| DY435434 |      | turquoise | 1553.6 | 1553.1829 | 0.9965278 | 0.00024548 | 1.558   | turquoise | 973.525 | 889.323 | 0.9689079 | 0.0065505 | 0.738  | --    |
| DY437503 |      | turquoise | 1174.2 | 1172.5047 | 0.9358593 | 0.01931129 | 15.906  | turquoise | 901.091 | 879.164 | 0.964877  | 0.00786   | 12.476 | --    |
| DY437556 |      | turquoise | 990.91 | 990.02992 | 0.900874  | 0.036902   | 0.78    | turquoise | 1043.87 | 1009.42 | 0.9987173 | 5.51E-05  | 2.506  | --    |
| DY438052 |      | turquoise | 1486.6 | 1486.1697 | 0.9858437 | 0.00201759 | 3.318   | turquoise | 269.262 | 240.653 | 0.6848624 | 0.2020257 | 7.482  | --    |
| DY438091 |      | turquoise | 1056.7 | 1054.5124 | 0.9092509 | 0.0323665  | 26.372  | turquoise | 1040.07 | 1003.62 | 0.9973679 | 0.000162  | 33.014 | --    |
| DB789553 |      | turquoise | 1547.6 | 1547.198  | 0.9952789 | 0.00038913 | 1.938   | turquoise | 910.626 | 863.013 | 0.9614602 | 0.0090297 | 5.196  | --    |
| DB789579 |      | turquoise | 1553.6 | 1553.1829 | 0.9965278 | 0.00024548 | 0.566   | turquoise | 1015.27 | 988.541 | 0.9929221 | 0.0007141 | 4.128  | --    |
| DB789650 |      | turquoise | 230.89 | 221.3952  | 0.5498323 | 0.3370085  | 11.054  | turquoise | 1001.43 | 951.221 | 0.9848324 | 0.0022373 | 15.384 | 0     |
| DB789990 |      | turquoise | 1303.9 | 1302.754  | 0.9590759 | 0.00987686 | 12.652  | turquoise | 295.954 | 247.42  | 0.6958774 | 0.1918796 | 12.358 | --    |
| DB786410 |      | turquoise | 1487.7 | 1487.0537 | 0.9884035 | 0.00149646 | 34.92   | turquoise | 1050.74 | 999.612 | 0.9969206 | 0.000205  | 50.498 | --    |
| DB786768 |      | turquoise | 1568.5 | 1568.1379 | 0.9990706 | 3.40E-05   | 3.056   | turquoise | 1032.26 | 970.653 | 0.9901332 | 0.0011748 | 7.04   | --    |
| DB787689 |      | turquoise | 1178.4 | 1177.4389 | 0.9256989 | 0.02403954 | 13.034  | turquoise | 1000.24 | 945.376 | 0.9834856 | 0.0025413 | 18.954 | --    |
| DB788150 |      | turquoise | 1405   | 1404.285  | 0.9765443 | 0.00429707 | 21.632  | turquoise | 737.007 | 708.714 | 0.9150624 | 0.0293341 | 17.064 | 0     |
| DB788467 |      | turquoise | 1559.5 | 1559.1204 | 0.9972444 | 0.00017358 | 6.778   | turquoise | 820.406 | 782.345 | 0.9367508 | 0.0189126 | 9.744  | 0.272 |
| DB794356 |      | turquoise | 1389.6 | 1389.1292 | 0.9695325 | 0.00635469 | 6.288   | turquoise | 509.126 | 357.914 | 0.7500809 | 0.1442255 | 11.942 | --    |
| DB803904 |      | turquoise | 1329.9 | 1328.8577 | 0.9589506 | 0.00992206 | 3.416   | turquoise | 160.551 | 95.7031 | 0.4694848 | 0.4249831 | 3.966  | --    |
| DB805450 |      | turquoise | 232.19 | 180.63256 | 0.438152  | 0.46053029 | 36.654  | turquoise | 1014.16 | 986.135 | 0.9925596 | 0.0007696 | 27.066 | --    |
| DB801635 |      | turquoise | 1514.1 | 1513.7525 | 0.9897361 | 0.00124633 | 14.924  | turquoise | 1020.41 | 988.007 | 0.9937137 | 0.0005977 | 14.986 | --    |
| AK235649 | PLTP | turquoise | 429.67 | 424.20985 | 0.7156535 | 0.17404225 | 2.912   | turquoise | 1009.01 | 980.515 | 0.9911545 | 0.0009973 | 5.868  | 1.213 |
| DT329775 |      | turquoise | 1562.6 | 1562.1992 | 0.9984439 | 7.37E-05   | 3.51    | turquoise | 1033.48 | 995.764 | 0.9956238 | 0.0003473 | 4.694  | 99    |
| DT331358 |      | turquoise | 785.4  | 781.16759 | 0.83838   | 0.07607769 | 21.226  | turquoise | 1002.93 | 974.883 | 0.9895436 | 0.0012815 | 25.16  | 99    |
| ES445611 |      | turquoise | 1570.6 | 1570.2246 | 0.9994948 | 1.36E-05   | 1.548   | turquoise | 1011.99 | 982.721 | 0.9919181 | 0.0008711 | 5.358  | --    |
| ES447414 |      | turquoise | 1435.3 | 1434.7981 | 0.9754809 | 0.00459183 | 23.64   | turquoise | 927.995 | 887.779 | 0.9694245 | 0.0063884 | 31.966 | --    |
| ES447504 |      | turquoise | 1448.6 | 1447.8458 | 0.982674  | 0.00273054 | 8.694   | turquoise | 851.976 | 739.083 | 0.9235113 | 0.0251006 | 18.796 | --    |
| ES447553 |      | turquoise | 1506.7 | 1506.2356 | 0.9896312 | 0.00126546 | 1.352   | turquoise | 1046.97 | 1010.37 | 0.9990092 | 3.74E-05  | 3.344  | --    |
| EV900222 |      | turquoise | 1562.5 | 1562.0281 | 0.9991765 | 2.84E-05   | 3.082   | turquoise | 1038.01 | 1001.56 | 0.9966576 | 0.0002318 | 6.562  | --    |
| EV910030 |      | turquoise | 1422.6 | 1421.8366 | 0.9790461 | 0.00362963 | 28.952  | turquoise | 1011.38 | 958.298 | 0.9876465 | 0.0016452 | 29.652 | 0     |
| EV951008 |      | turquoise | 1496.4 | 1495.9457 | 0.9860854 | 0.00196622 | 2.03    | turquoise | 435.82  | 297.347 | 0.7075921 | 0.1812534 | 3.072  | --    |
| EV974686 |      | turquoise | 306.33 | 301.15386 | 0.6287013 | 0.25592544 | 3.464   | turquoise | 640.487 | 628.277 | 0.8813149 | 0.0481994 | 4.926  | --    |
| EW054481 |      | turquoise | 1426.6 | 1426.092  | 0.9763493 | 0.00435064 | 13.136  | turquoise | 477.182 | 399.676 | 0.7821138 | 0.1180182 | 18.594 | --    |
| EW054741 |      | turquoise | 1536.1 | 1535.6724 | 0.994826  | 0.00044641 | 2.666   | turquoise | 579.925 | 441.185 | 0.7991257 | 0.1047566 | 4.112  | --    |
| EW074147 |      | turquoise | 272.65 | 265.0662  | 0.5975428 | 0.28726279 | 106.744 | turquoise | 958.811 | 879.972 | 0.9664589 | 0.0073367 | 99.526 | --    |

|          |           |        |           |           |            |         |           |         |         |           |           |         |      |
|----------|-----------|--------|-----------|-----------|------------|---------|-----------|---------|---------|-----------|-----------|---------|------|
| EW075751 | turquoise | 1553.6 | 1553.1829 | 0.9965278 | 0.00024548 | 0.142   | turquoise | 1015.27 | 988.541 | 0.9929221 | 0.0007141 | 1.894   | --   |
| EW078900 | turquoise | 1223.8 | 1222.5704 | 0.9461132 | 0.01489415 | 3.614   | turquoise | 736.086 | 706.734 | 0.9108962 | 0.0314983 | 7.704   | --   |
| EW079103 | turquoise | 182.84 | 134.82299 | 0.3725692 | 0.53684518 | 108.874 | turquoise | 1035.13 | 1001.53 | 0.9965502 | 0.0002431 | 102.004 | --   |
| EW079881 | turquoise | 1553.6 | 1553.1829 | 0.9965278 | 0.00024548 | 0.378   | turquoise | 1015.27 | 988.541 | 0.9929221 | 0.0007141 | 1.894   | 0.23 |
| EW080318 | turquoise | 654.01 | 648.00093 | 0.7974804 | 0.10601824 | 3.788   | turquoise | 1010.27 | 979.925 | 0.991044  | 0.0010161 | 7.112   | --   |
| EW080828 | turquoise | 1553.6 | 1553.1829 | 0.9965278 | 0.00024548 | 0.898   | turquoise | 1024.21 | 995.815 | 0.9948582 | 0.0004423 | 4.342   | --   |
| EW082850 | turquoise | 1233.5 | 1231.9393 | 0.9433601 | 0.01604326 | 2.084   | turquoise | 1019.6  | 992.105 | 0.9938695 | 0.0005757 | 9.146   | --   |
| EW085361 | turquoise | 1571   | 1570.5891 | 0.9995834 | 1.02E-05   | 1.454   | turquoise | 812.98  | 798.266 | 0.9397703 | 0.0175827 | 5.39    | --   |
| EW085980 | turquoise | 550.69 | 543.15759 | 0.7538168 | 0.14108977 | 5.778   | turquoise | 1029.94 | 999.751 | 0.9960829 | 0.0002941 | 5.43    | --   |
| EW087115 | turquoise | 1553.6 | 1553.1829 | 0.9965278 | 0.00024548 | 3.07    | turquoise | 1015.27 | 988.541 | 0.9929221 | 0.0007141 | 16.376  | --   |
| EW088450 | turquoise | 1553.6 | 1553.1829 | 0.9965278 | 0.00024548 | 2.268   | turquoise | 1015.27 | 988.541 | 0.9929221 | 0.0007141 | 2.978   | 99   |
| EW089070 | turquoise | 1458   | 1457.3674 | 0.9842466 | 0.00236793 | 12.308  | turquoise | 1030.23 | 978.707 | 0.9918516 | 0.0008819 | 18.004  | --   |
| EW089197 | turquoise | 1553.6 | 1553.1829 | 0.9965278 | 0.00024548 | 0.188   | turquoise | 1015.27 | 988.541 | 0.9929221 | 0.0007141 | 1.556   | --   |
| EW089920 | turquoise | 1355.6 | 1355.0556 | 0.9618604 | 0.00888992 | 0.52    | turquoise | 1015.27 | 988.541 | 0.9929221 | 0.0007141 | 4.128   | --   |
| EW090244 | turquoise | 724.11 | 720.63911 | 0.8276046 | 0.08366817 | 21.07   | turquoise | 1041.33 | 987.78  | 0.9940466 | 0.0005509 | 25.332  | --   |
| EW090454 | turquoise | 1553.6 | 1553.1829 | 0.9965278 | 0.00024548 | 2.786   | turquoise | 1040.61 | 1007.93 | 0.9981356 | 9.66E-05  | 2.08    | --   |
| EW093429 | turquoise | 1553.6 | 1553.1829 | 0.9965278 | 0.00024548 | 0.426   | turquoise | 1015.27 | 988.541 | 0.9929221 | 0.0007141 | 2.91    | --   |
| EW094407 | turquoise | 1553.6 | 1553.1829 | 0.9965278 | 0.00024548 | 0.566   | turquoise | 999.607 | 974.678 | 0.9894189 | 0.0013045 | 4.084   | --   |
| EW095754 | turquoise | 1531.6 | 1531.1827 | 0.9944401 | 0.00049724 | 1.794   | turquoise | 998.903 | 974.025 | 0.9892544 | 0.001335  | 3.3     | 99   |
| EW097961 | turquoise | 1531.1 | 1530.6797 | 0.9939262 | 0.00056771 | 92.334  | turquoise | 767.727 | 643.544 | 0.8915675 | 0.042158  | 96.438  | --   |
| EW098042 | turquoise | 1568.5 | 1568.1238 | 0.9996061 | 9.38E-06   | 2.758   | turquoise | 1053.44 | 1013.32 | 0.9998675 | 1.83E-06  | 1.82    | --   |
| EW099557 | turquoise | 136.15 | 111.44921 | 0.401831  | 0.50249588 | 78.814  | turquoise | 704.233 | 644.655 | 0.8923372 | 0.0417149 | 50.79   | --   |
| EW101413 | turquoise | 1528.8 | 1528.4552 | 0.9927918 | 0.00073384 | 3.422   | turquoise | 615.365 | 511.878 | 0.8387032 | 0.0758535 | 5.49    | --   |
| EW107866 | turquoise | 1553.6 | 1553.1829 | 0.9965278 | 0.00024548 | 1.512   | turquoise | 306.773 | 254.009 | 0.6706162 | 0.2153628 | 1.348   | --   |
| EW109769 | turquoise | 1393.4 | 1392.641  | 0.9724651 | 0.00546208 | 9.792   | turquoise | 892.569 | 860.267 | 0.9589172 | 0.0099341 | 3.264   | --   |
| EW133912 | turquoise | 631.28 | 626.71699 | 0.7804147 | 0.11936852 | 10.99   | turquoise | 901.777 | 879.595 | 0.9656225 | 0.0076119 | 13.762  | --   |
| EW139582 | turquoise | 1495.2 | 1494.6647 | 0.9871464 | 0.00174595 | 11.35   | turquoise | 586.766 | 496.781 | 0.833476  | 0.0795046 | 10.572  | --   |
| EW141069 | turquoise | 1413.7 | 1412.8822 | 0.9756811 | 0.00453587 | 5.136   | turquoise | 1053.73 | 1013.44 | 0.9999381 | 5.84E-07  | 5.98    | --   |
| EW143820 | turquoise | 1464.8 | 1464.1983 | 0.9838495 | 0.00245786 | 28.18   | turquoise | 961.535 | 933.492 | 0.9796392 | 0.0034769 | 20.554  | --   |
| EW145802 | turquoise | 1546.4 | 1545.9374 | 0.9965637 | 0.00024169 | 4.612   | turquoise | 855.967 | 743.55  | 0.9258964 | 0.0239445 | 6.504   | --   |
| EW161383 | turquoise | 1261   | 1259.6921 | 0.9514663 | 0.01274124 | 80.588  | turquoise | 187.671 | 122.923 | 0.5180681 | 0.3712013 | 94.09   | --   |
| EW163138 | turquoise | 133.59 | 92.037929 | 0.3092657 | 0.61260103 | 15.052  | turquoise | 1038.94 | 1006.88 | 0.9978678 | 0.0001182 | 16.324  | --   |
| EW164836 | turquoise | 1434.6 | 1434.1644 | 0.978241  | 0.00384035 | 9.78    | turquoise | 555.822 | 449.146 | 0.8094908 | 0.0969149 | 6.616   | --   |
| EW172766 | turquoise | 143.56 | 118.47303 | 0.398076  | 0.50687783 | 0.866   | turquoise | 964.38  | 943.103 | 0.9808194 | 0.0031796 | 2.048   | --   |
| EW173726 | turquoise | 998.16 | 995.50359 | 0.8950883 | 0.04014345 | 29.618  | turquoise | 935.396 | 897.679 | 0.9702362 | 0.0061365 | 26.97   | --   |
| EW174492 | turquoise | 1009.9 | 1007.1426 | 0.8966816 | 0.03924217 | 35.346  | turquoise | 1013.23 | 954.319 | 0.9866006 | 0.0018582 | 29.394  | --   |

|          |           |        |           |           |            |         |           |         |         |           |           |         |       |
|----------|-----------|--------|-----------|-----------|------------|---------|-----------|---------|---------|-----------|-----------|---------|-------|
| EW177900 | turquoise | 765.93 | 760.90171 | 0.8304689 | 0.08162884 | 4.61    | turquoise | 997.966 | 972.329 | 0.9886978 | 0.0014399 | 7.556   | --    |
| EW179408 | turquoise | 1553.6 | 1553.1829 | 0.9965278 | 0.00024548 | 0.566   | turquoise | 1015.27 | 988.541 | 0.9929221 | 0.0007141 | 4.872   | --    |
| EW179426 | turquoise | 437.39 | 429.76509 | 0.6980169 | 0.18992607 | 6.878   | turquoise | 967.266 | 943.629 | 0.9818334 | 0.0029313 | 11.74   | --    |
| EW179891 | turquoise | 1066.5 | 1064.3501 | 0.9133352 | 0.03022525 | 7.33    | turquoise | 1015.84 | 978.272 | 0.9915371 | 0.0009334 | 6.046   | --    |
| EW180914 | turquoise | 1553.6 | 1553.1829 | 0.9965278 | 0.00024548 | 1.842   | turquoise | 1015.27 | 988.541 | 0.9929221 | 0.0007141 | 9.27    | --    |
| EW182797 | turquoise | 1203.1 | 1201.5887 | 0.9381078 | 0.01831107 | 3.076   | turquoise | 1047.54 | 1011.96 | 0.9992968 | 2.24E-05  | 2.496   | --    |
| EW186017 | turquoise | 458.17 | 455.86623 | 0.7363747 | 0.15590057 | 26.372  | turquoise | 1051.53 | 1009.59 | 0.9989343 | 4.18E-05  | 25.186  | --    |
| EW186377 | turquoise | 1390.8 | 1390.3204 | 0.970042  | 0.00619645 | 42.53   | turquoise | 969.42  | 935.661 | 0.980597  | 0.003235  | 34.294  | --    |
| EW187819 | turquoise | 1485.6 | 1485.1307 | 0.9848872 | 0.00222517 | 1.924   | turquoise | 809.409 | 794.488 | 0.9384223 | 0.0181726 | 2.278   | --    |
| EW189832 | turquoise | 1303.7 | 1302.4504 | 0.956844  | 0.01069213 | 2.366   | turquoise | 1032.84 | 996.397 | 0.9958321 | 0.0003228 | 3.336   | --    |
| EW189910 | turquoise | 1486.1 | 1485.4226 | 0.9878708 | 0.00160064 | 3.306   | turquoise | 906.081 | 884.041 | 0.9658782 | 0.0075274 | 6.056   | --    |
| EW190138 | turquoise | 1553.6 | 1553.1829 | 0.9965278 | 0.00024548 | 0.33    | turquoise | 1015.27 | 988.541 | 0.9929221 | 0.0007141 | 2.64    | --    |
| EW190356 | turquoise | 571.78 | 569.30257 | 0.7820332 | 0.11808215 | 2.84    | turquoise | 1019.19 | 990.563 | 0.9935104 | 0.000627  | 7.732   | --    |
| EW191736 | turquoise | 1183.3 | 1181.6534 | 0.9347001 | 0.01983362 | 49.04   | turquoise | 493.676 | 452.476 | 0.8036325 | 0.1013243 | 107.208 | --    |
| EW192631 | turquoise | 420.7  | 418.30055 | 0.7039806 | 0.18451092 | 3.51    | turquoise | 1048.71 | 1008.13 | 0.9985528 | 6.61E-05  | 5.368   | --    |
| EW193806 | turquoise | 1553.6 | 1553.1829 | 0.9965278 | 0.00024548 | 0.188   | turquoise | 1015.27 | 988.541 | 0.9929221 | 0.0007141 | 2.774   | 99    |
| EW194119 | turquoise | 1553.6 | 1553.1829 | 0.9965278 | 0.00024548 | 0.094   | turquoise | 1015.27 | 988.541 | 0.9929221 | 0.0007141 | 2.3     | --    |
| EW195015 | turquoise | 1446.1 | 1445.3729 | 0.9814218 | 0.00303128 | 14.222  | turquoise | 931.981 | 848.44  | 0.9577998 | 0.0103404 | 10.376  | --    |
| EW197779 | turquoise | 1062.7 | 1060.2313 | 0.9078715 | 0.03310019 | 1.898   | turquoise | 1020.88 | 993.141 | 0.9941454 | 0.0005373 | 14.234  | --    |
| EW198502 | turquoise | 1553.6 | 1553.1829 | 0.9965278 | 0.00024548 | 0.142   | turquoise | 1015.27 | 988.541 | 0.9929221 | 0.0007141 | 1.76    | --    |
| EW198996 | turquoise | 1198.1 | 1197.1074 | 0.9297602 | 0.02210951 | 44.884  | turquoise | 902.824 | 855.684 | 0.9621825 | 0.008778  | 35.496  | --    |
| EW200082 | turquoise | 887.09 | 885.88736 | 0.8749998 | 0.05204568 | 0.572   | turquoise | 1034.47 | 1003.66 | 0.9969667 | 0.0002004 | 1.906   | --    |
| EW201053 | turquoise | 1494.7 | 1494.1566 | 0.9895103 | 0.00128765 | 31.522  | turquoise | 1024.21 | 991.905 | 0.9942466 | 0.0005234 | 43.906  | --    |
| EW201455 | turquoise | 1553.6 | 1553.1829 | 0.9965278 | 0.00024548 | 0.756   | turquoise | 1015.27 | 988.541 | 0.9929221 | 0.0007141 | 3.248   | --    |
| EW202873 | turquoise | 195.38 | 139.56078 | 0.3967708 | 0.50840272 | 4.52    | turquoise | 992.302 | 951.622 | 0.9844589 | 0.0023203 | 6.104   | --    |
| EW205532 | turquoise | 634.69 | 629.04924 | 0.79451   | 0.10830748 | 15.658  | turquoise | 1024.94 | 993.726 | 0.9949055 | 0.0004362 | 24.14   | --    |
| EW238270 | turquoise | 641.93 | 636.16175 | 0.7927233 | 0.10969161 | 34.224  | turquoise | 297.836 | 174.1   | 0.5855299 | 0.2995948 | 39.99   | --    |
| EW249451 | turquoise | 1538.9 | 1538.4311 | 0.9960554 | 0.00029722 | 151.586 | turquoise | 1034.96 | 985.687 | 0.9940923 | 0.0005446 | 156.742 | 0     |
| EW251159 | turquoise | 1510   | 1509.5894 | 0.9883922 | 0.00149865 | 7.294   | turquoise | 1026.83 | 990.289 | 0.9944282 | 0.0004988 | 7.922   | --    |
| EW251531 | turquoise | 1471.1 | 1470.7081 | 0.9844133 | 0.0023305  | 2.272   | turquoise | 1013.88 | 987.119 | 0.9925436 | 0.000772  | 4.85    | --    |
| EW251561 | turquoise | 862.06 | 857.67655 | 0.8577866 | 0.06298778 | 3.532   | turquoise | 1034.66 | 1000.61 | 0.9965334 | 0.0002449 | 4.978   | --    |
| EW255075 | turquoise | 1565.6 | 1565.178  | 0.9987197 | 5.50E-05   | 7.422   | turquoise | 801.722 | 708.744 | 0.9148743 | 0.0294307 | 18.112  | --    |
| EW268677 | turquoise | 1186.6 | 1184.9712 | 0.9378285 | 0.01843441 | 195.028 | turquoise | 512.516 | 403.193 | 0.7839143 | 0.1165923 | 112.91  | --    |
| EW272029 | turquoise | 1082.8 | 1080.954  | 0.9130728 | 0.03036144 | 34.184  | turquoise | 733.074 | 676.856 | 0.9053588 | 0.0344501 | 35.708  | --    |
| EW277811 | turquoise | 970.48 | 968.23674 | 0.8929934 | 0.04133836 | 24.522  | turquoise | 921.619 | 885.103 | 0.9680042 | 0.0068372 | 17.326  | 0.359 |
| EW299585 | turquoise | 1508.7 | 1508.2032 | 0.9908878 | 0.00104274 | 95.958  | turquoise | 840.426 | 735.561 | 0.9240897 | 0.0248186 | 67.774  | --    |

|          |           |        |           |           |            |        |           |         |         |           |           |        |       |
|----------|-----------|--------|-----------|-----------|------------|--------|-----------|---------|---------|-----------|-----------|--------|-------|
| EW302543 | turquoise | 1515.9 | 1515.469  | 0.9919744 | 0.00086203 | 1.79   | turquoise | 1053.3  | 1008.2  | 0.998927  | 4.22E-05  | 8.352  | --    |
| EW329662 | turquoise | 1523.9 | 1523.4643 | 0.9930154 | 0.00069999 | 4.004  | turquoise | 1017.7  | 961.932 | 0.9877829 | 0.001618  | 4.824  | --    |
| EW329931 | turquoise | 98.603 | 90.85533  | 0.4188342 | 0.48275352 | 30.086 | turquoise | 1017.71 | 951.815 | 0.9851659 | 0.002164  | 34.016 | --    |
| EW337334 | turquoise | 457.92 | 445.03224 | 0.6971173 | 0.19074672 | 1.586  | turquoise | 995.183 | 970.947 | 0.9883856 | 0.0014999 | 2.36   | --    |
| EW357378 | turquoise | 439.59 | 434.27339 | 0.7257581 | 0.16512344 | 0.178  | turquoise | 1005.91 | 980.319 | 0.9907929 | 0.001059  | 2.116  | --    |
| EW372898 | turquoise | 1464.6 | 1464.1223 | 0.9846393 | 0.00228006 | 10.982 | turquoise | 1013.75 | 967.888 | 0.9893073 | 0.0013251 | 7.348  | --    |
| EW390240 | turquoise | 1524.8 | 1524.321  | 0.9926093 | 0.00076187 | 0.996  | turquoise | 1015.27 | 988.541 | 0.9929221 | 0.0007141 | 1.556  | --    |
| EW395978 | turquoise | 687.45 | 686.4169  | 0.8200384 | 0.08912881 | 16.202 | turquoise | 1040.16 | 998.538 | 0.9963813 | 0.0002612 | 16.106 | --    |
| EW418907 | turquoise | 144.97 | 132.36715 | 0.4454197 | 0.45222879 | 42.096 | turquoise | 973.864 | 937.883 | 0.9816232 | 0.0029822 | 37.14  | --    |
| EW422073 | turquoise | 1554.6 | 1554.2423 | 0.9970789 | 0.00018944 | 4.044  | turquoise | 592.051 | 537.392 | 0.8468454 | 0.0702735 | 1.256  | 0.57  |
| EW424869 | turquoise | 1554.1 | 1553.7345 | 0.996738  | 0.00022354 | 73.226 | turquoise | 1050.1  | 1013.03 | 0.9996175 | 8.98E-06  | 36.796 | --    |
| EW430401 | turquoise | 1561.8 | 1561.39   | 0.9978836 | 0.00011684 | 4.382  | turquoise | 1053.71 | 1013.2  | 0.9998576 | 2.04E-06  | 2.51   | 0.351 |
| EW431129 | turquoise | 1534.2 | 1533.8616 | 0.9934403 | 0.00063713 | 4.15   | turquoise | 1036.67 | 1005.21 | 0.9973628 | 0.0001625 | 4.652  | --    |
| EW435434 | turquoise | 198.94 | 182.46469 | 0.5044437 | 0.38610968 | 52.56  | turquoise | 946.919 | 875.042 | 0.9645008 | 0.0079861 | 58.39  | --    |
| EW450885 | turquoise | 1506.4 | 1506.0298 | 0.9899776 | 0.00120264 | 16.836 | turquoise | 705.531 | 618.779 | 0.8846795 | 0.0461886 | 20.192 | --    |
| EW479707 | turquoise | 600.97 | 597.45205 | 0.7667073 | 0.13042826 | 18.302 | turquoise | 875.092 | 855.67  | 0.9572631 | 0.0105374 | 16.448 | --    |
| EW484432 | turquoise | 1553.7 | 1553.2404 | 0.9981483 | 9.56E-05   | 11.556 | turquoise | 616.124 | 600.077 | 0.8751977 | 0.0519237 | 11.888 | --    |
| EW495076 | turquoise | 1352.1 | 1351.0821 | 0.9664033 | 0.00735491 | 2.116  | turquoise | 1005.49 | 979.957 | 0.9907187 | 0.0010719 | 5.604  | --    |
| EW498151 | turquoise | 1553.6 | 1553.1829 | 0.9965278 | 0.00024548 | 0.426  | turquoise | 1015.27 | 988.541 | 0.9929221 | 0.0007141 | 2.368  | 99    |
| EW524237 | turquoise | 1555.5 | 1555.0811 | 0.9968293 | 0.00021422 | 14.592 | turquoise | 1053.48 | 1013.53 | 0.9999022 | 1.16E-06  | 6.172  | --    |
| EW529657 | turquoise | 1488.4 | 1487.8123 | 0.9889906 | 0.00138439 | 0.694  | turquoise | 1010.32 | 984.293 | 0.9917963 | 0.0008909 | 3.334  | --    |
| EW532021 | turquoise | 739.35 | 736.61026 | 0.8154747 | 0.09247326 | 28.142 | turquoise | 899.416 | 809.971 | 0.9460308 | 0.0149282 | 29.024 | --    |
| EW534339 | turquoise | 453.58 | 448.94553 | 0.7130773 | 0.17633757 | 16.924 | turquoise | 188.767 | 136.53  | 0.5584914 | 0.3278311 | 40.994 | --    |
| EW535325 | turquoise | 387.65 | 379.65305 | 0.6728414 | 0.21326397 | 13.286 | turquoise | 990.064 | 959.083 | 0.9861717 | 0.001948  | 12.546 | --    |
| EW536534 | turquoise | 1231.9 | 1230.2988 | 0.9430962 | 0.0161549  | 0.784  | turquoise | 1034.42 | 1003.63 | 0.9969568 | 0.0002014 | 2.892  | --    |
| EW537255 | turquoise | 1553.6 | 1553.1829 | 0.9965278 | 0.00024548 | 1.04   | turquoise | 975.146 | 946.678 | 0.9825281 | 0.002765  | 3.18   | --    |
| EW537783 | turquoise | 1545.1 | 1544.7252 | 0.9958115 | 0.0003252  | 1.492  | turquoise | 1045.54 | 1009.46 | 0.9986609 | 5.88E-05  | 5.244  | --    |
| EW538044 | turquoise | 421.04 | 402.42237 | 0.6690963 | 0.2167996  | 91.56  | turquoise | 438.673 | 393.795 | 0.7732734 | 0.125094  | 82.044 | --    |
| EW561372 | turquoise | 1492.4 | 1491.9386 | 0.9877082 | 0.00163289 | 6.384  | turquoise | 1034.26 | 1002.18 | 0.996661  | 0.0002315 | 8.946  | --    |
| EW566285 | turquoise | 296.64 | 272.1102  | 0.5815512 | 0.30370867 | 12.918 | turquoise | 1048.2  | 1008.52 | 0.9986393 | 6.02E-05  | 7.528  | --    |
| EW566432 | turquoise | 1558.5 | 1558.0665 | 0.9976351 | 0.00013801 | 22.148 | turquoise | 1030.7  | 974.569 | 0.9912836 | 0.0009756 | 26.016 | --    |
| EW569764 | turquoise | 267.85 | 252.15599 | 0.5771416 | 0.30828496 | 21.038 | turquoise | 1006.93 | 971.486 | 0.9892918 | 0.001328  | 14.466 | --    |
| EW571676 | turquoise | 91.733 | 82.110037 | 0.3824515 | 0.52519372 | 1.704  | turquoise | 966.399 | 944.573 | 0.9814917 | 0.0030142 | 2.688  | --    |
| EW573852 | turquoise | 1529.9 | 1529.3913 | 0.9940927 | 0.00054455 | 20.458 | turquoise | 1028.55 | 981.257 | 0.9923316 | 0.0008052 | 24.002 | --    |
| EW575758 | turquoise | 1499.4 | 1498.8321 | 0.9905119 | 0.00110786 | 6.588  | turquoise | 613.219 | 580.114 | 0.8689797 | 0.0557978 | 3.112  | --    |
| EW576972 | turquoise | 1447.9 | 1447.4963 | 0.9814314 | 0.00302892 | 1.002  | turquoise | 1010.06 | 984.253 | 0.9917771 | 0.000894  | 5.238  | --    |



|          |           |        |           |           |            |        |           |         |         |           |           |        |    |
|----------|-----------|--------|-----------|-----------|------------|--------|-----------|---------|---------|-----------|-----------|--------|----|
| EW577030 | turquoise | 346    | 334.52857 | 0.6518793 | 0.23325841 | 41.514 | turquoise | 1039.27 | 1004.38 | 0.9973158 | 0.0001669 | 43.88  | -- |
| EW577185 | turquoise | 300.45 | 289.77445 | 0.6303187 | 0.25432534 | 79.13  | turquoise | 920.231 | 869.128 | 0.9646324 | 0.0079419 | 73.338 | -- |
| EW577489 | turquoise | 1107.5 | 1105.98   | 0.9226762 | 0.02550946 | 47.644 | turquoise | 1031.93 | 995.519 | 0.9954167 | 0.0003722 | 37.47  | -- |
| EW577619 | turquoise | 1559.4 | 1558.9919 | 0.9988547 | 4.65E-05   | 8.982  | turquoise | 539.171 | 466.34  | 0.8117376 | 0.0952397 | 17.44  | -- |
| EW578058 | turquoise | 1269.7 | 1268.5601 | 0.9504962 | 0.01312322 | 1.212  | turquoise | 1018.78 | 991.441 | 0.9936789 | 0.0006027 | 11.952 | 0  |
| EW578108 | turquoise | 1454.1 | 1453.4318 | 0.9822857 | 0.00282269 | 9.59   | turquoise | 964.652 | 917.07  | 0.9752052 | 0.0046693 | 14.822 | -- |
| EW578118 | turquoise | 1490.3 | 1489.7769 | 0.9883816 | 0.00150071 | 3.476  | turquoise | 1044.06 | 1010.1  | 0.9987808 | 5.11E-05  | 6.774  | -- |
| EW578417 | turquoise | 1463.6 | 1463.0543 | 0.9822072 | 0.00284144 | 3.978  | turquoise | 993.305 | 940.654 | 0.9820009 | 0.0028909 | 5.06   | -- |
| EW585518 | turquoise | 1437.3 | 1436.8616 | 0.977166  | 0.00412776 | 3.634  | turquoise | 619.214 | 595.382 | 0.8731116 | 0.0532137 | 6.122  | -- |
| EW618947 | turquoise | 208.7  | 149.66521 | 0.3858321 | 0.52121965 | 18.882 | turquoise | 939.286 | 857.942 | 0.960704  | 0.0092957 | 12.452 | -- |
| EW633611 | turquoise | 580.85 | 576.58031 | 0.7623497 | 0.13400459 | 0.236  | turquoise | 1015.27 | 988.541 | 0.9929221 | 0.0007141 | 1.828  | -- |
| EW637050 | turquoise | 1348.2 | 1347.3531 | 0.9647417 | 0.00790526 | 67.512 | turquoise | 830.99  | 717.025 | 0.9159879 | 0.02886   | 80.422 | -- |
| EW638124 | turquoise | 1212.9 | 1211.6894 | 0.938933  | 0.01794835 | 24.136 | turquoise | 996.877 | 948.941 | 0.9837075 | 0.0024903 | 20.972 | -- |
| EW645536 | turquoise | 1536   | 1535.4402 | 0.9956507 | 0.0003441  | 5.24   | turquoise | 866.206 | 785.536 | 0.9396337 | 0.0176422 | 3.164  | -- |
| EW651254 | turquoise | 669.74 | 664.51304 | 0.8045849 | 0.10060341 | 18.048 | turquoise | 1035.26 | 996.737 | 0.9956553 | 0.0003436 | 25.454 | -- |
| EW656756 | turquoise | 1012.6 | 1010.5805 | 0.8919919 | 0.0419135  | 29.098 | turquoise | 1032.61 | 995.145 | 0.9954142 | 0.0003725 | 26.232 | -- |
| EW660426 | turquoise | 1439.3 | 1438.5616 | 0.9799493 | 0.00339797 | 12.98  | turquoise | 900.26  | 795.734 | 0.9420732 | 0.0165899 | 7.302  | -- |
| EW662770 | turquoise | 1552.9 | 1552.4897 | 0.996255  | 0.00027496 | 5.112  | turquoise | 686.636 | 648.437 | 0.9022604 | 0.0361383 | 9.49   | -- |
| EW674892 | turquoise | 1400.9 | 1400.4828 | 0.9731331 | 0.00526505 | 36.762 | turquoise | 980.853 | 941.118 | 0.9819756 | 0.002897  | 32.176 | -- |
| EW677807 | turquoise | 1340.6 | 1339.5681 | 0.9653276 | 0.00770971 | 37.134 | turquoise | 865.716 | 770.963 | 0.9361662 | 0.0191738 | 33.258 | -- |
| EX654498 | turquoise | 1553.6 | 1553.1829 | 0.9965278 | 0.00024548 | 0.52   | turquoise | 1015.27 | 988.541 | 0.9929221 | 0.0007141 | 1.894  | 0  |
| EX655280 | turquoise | 597.95 | 591.67963 | 0.777527  | 0.12167407 | 32.426 | turquoise | 1035.54 | 992.824 | 0.995116  | 0.0004094 | 32.84  | -- |
| EH005985 | turquoise | 720.93 | 717.9383  | 0.8156313 | 0.09235784 | 17.872 | turquoise | 339.063 | 278.336 | 0.6905135 | 0.1968019 | 24.898 | -- |
| AW785225 | turquoise | 1322.5 | 1321.4221 | 0.9579951 | 0.01026901 | 4.252  | turquoise | 320.811 | 216.274 | 0.6350904 | 0.2496204 | 5.548  | -- |
| BE232673 | turquoise | 1439.9 | 1439.2455 | 0.9797197 | 0.00345638 | 0.938  | turquoise | 1015.27 | 988.541 | 0.9929221 | 0.0007141 | 1.76   | -- |
| BE234968 | turquoise | 317.84 | 293.43533 | 0.5961223 | 0.28871394 | 2.41   | turquoise | 855.136 | 831.758 | 0.9508283 | 0.012992  | 3.896  | -- |
| BE235175 | turquoise | 1518.8 | 1518.3516 | 0.9922192 | 0.00082293 | 4.022  | turquoise | 1035.32 | 1004.28 | 0.997133  | 0.0001842 | 3.676  | -- |
| BG733282 | turquoise | 1539   | 1538.5351 | 0.9957508 | 0.00033229 | 2.802  | turquoise | 991.941 | 930.15  | 0.9795514 | 0.0034994 | 2.93   | 99 |
| BG733214 | turquoise | 1537.5 | 1537.0585 | 0.9943439 | 0.0005102  | 3.24   | turquoise | 1017.09 | 989.899 | 0.9933715 | 0.0006472 | 4.626  | -- |
| BI338650 | turquoise | 1479.9 | 1479.2641 | 0.9868027 | 0.00181635 | 10.62  | turquoise | 935.709 | 900.339 | 0.9730666 | 0.0052845 | 8.2    | 99 |
| AW312281 | turquoise | 1556.5 | 1556.0978 | 0.9978001 | 0.00012382 | 5.442  | turquoise | 641.33  | 620.353 | 0.879567  | 0.0492546 | 8.36   | -- |
| BF077739 | turquoise | 1486.7 | 1486.1357 | 0.9887241 | 0.00143491 | 5.51   | turquoise | 953.097 | 887.766 | 0.9682913 | 0.0067457 | 5.282  | 0  |
| BF079211 | turquoise | 1553.6 | 1553.1829 | 0.9965278 | 0.00024548 | 0.378  | turquoise | 1021.09 | 993.274 | 0.9941673 | 0.0005343 | 4.494  | -- |
| BF190991 | turquoise | 1452.2 | 1451.5957 | 0.9829846 | 0.00265757 | 18.978 | turquoise | 529.187 | 512.243 | 0.8483011 | 0.0692899 | 10.64  | -- |
| BI341100 | turquoise | 1494.8 | 1494.2651 | 0.9895512 | 0.00128012 | 6.682  | turquoise | 1039.87 | 981.305 | 0.9924973 | 0.0007792 | 16.344 | -- |
| BI347030 | turquoise | 1553.6 | 1553.1829 | 0.9965278 | 0.00024548 | 0.472  | turquoise | 1000.17 | 975.2   | 0.9895506 | 0.0012802 | 2.074  | -- |

|          |           |        |           |           |            |        |           |         |         |           |           |        |    |
|----------|-----------|--------|-----------|-----------|------------|--------|-----------|---------|---------|-----------|-----------|--------|----|
| BI360398 | turquoise | 1553.6 | 1553.1829 | 0.9965278 | 0.00024548 | 0.52   | turquoise | 1005.91 | 980.319 | 0.9907929 | 0.001059  | 2.116  | -- |
| BI360586 | turquoise | 1553.6 | 1553.1829 | 0.9965278 | 0.00024548 | 0.614  | turquoise | 1015.27 | 988.541 | 0.9929221 | 0.0007141 | 4.602  | -- |
| BI359639 | turquoise | 324.2  | 302.81884 | 0.6074556 | 0.27718953 | 15.898 | turquoise | 1039.79 | 999.165 | 0.9964974 | 0.0002487 | 14.848 | -- |
| BE241031 | turquoise | 1363.8 | 1363.1895 | 0.9661943 | 0.00742341 | 4.446  | turquoise | 835.078 | 799.481 | 0.9415849 | 0.0167988 | 7.428  | -- |
| BF712298 | turquoise | 1553.6 | 1553.1829 | 0.9965278 | 0.00024548 | 0.284  | turquoise | 1015.27 | 988.541 | 0.9929221 | 0.0007141 | 3.858  | -- |
| BF703663 | turquoise | 1473.9 | 1473.3196 | 0.9850851 | 0.00218168 | 7.396  | turquoise | 448.62  | 308.491 | 0.7129721 | 0.1764315 | 9.24   | -- |
| BI398876 | turquoise | 1500.2 | 1499.5241 | 0.9905043 | 0.00110918 | 2.01   | turquoise | 523.021 | 368.478 | 0.7633156 | 0.1332093 | 2.298  | -- |
| BF702205 | turquoise | 1407.1 | 1406.5446 | 0.9728862 | 0.00533759 | 16.772 | turquoise | 718.402 | 642.499 | 0.8969204 | 0.0391076 | 23.728 | -- |
| BI181520 | turquoise | 1483.1 | 1482.6116 | 0.9860614 | 0.00197129 | 1.956  | turquoise | 1039.51 | 981.647 | 0.9926006 | 0.0007632 | 5.114  | 99 |
| BI186233 | turquoise | 1421   | 1420.3677 | 0.9772495 | 0.00410517 | 1.906  | turquoise | 1018.08 | 987.092 | 0.9930257 | 0.0006984 | 3.306  | -- |
| BI186417 | turquoise | 1152.5 | 1151.2523 | 0.9298541 | 0.02206553 | 35.704 | turquoise | 943.7   | 906.171 | 0.9729105 | 0.0053304 | 23.526 | -- |
| BI182177 | turquoise | 1312   | 1310.6997 | 0.9585944 | 0.01005096 | 10.206 | turquoise | 984.549 | 915.03  | 0.9754419 | 0.0046028 | 19.472 | 99 |
| BI401500 | turquoise | 707.35 | 699.61072 | 0.8055134 | 0.09990205 | 0.548  | turquoise | 1047.27 | 1011.83 | 0.9992564 | 2.43E-05  | 6.088  | -- |
| BQ605037 | turquoise | 1256   | 1254.6513 | 0.9504492 | 0.0131418  | 6.266  | turquoise | 798.34  | 765.389 | 0.9303584 | 0.0218297 | 5.692  | -- |
| CA779544 | turquoise | 1386.1 | 1385.1941 | 0.9726534 | 0.00540629 | 8.006  | turquoise | 1022.9  | 978.959 | 0.9913228 | 0.000969  | 15.196 | 99 |

Table S4-3 Module eigengene and its evolutionary rates in the common module between LT and LDE (postnatal turquoise vs turquoise).

| pig_Genebank   | pig_Gene | LDE       |        |         |           |           | LT       |           |        |          |           | Ka/Ks    |           |          |
|----------------|----------|-----------|--------|---------|-----------|-----------|----------|-----------|--------|----------|-----------|----------|-----------|----------|
|                |          | Module    | kTotal | kWithin | eigencorr | eigenpval | meanExpr | Module    | kTotal | kWithin  | eigencorr |          | eigenpval | meanExpr |
| AK230747.1     | DDX47    | turquoise | 155.67 | 49.5587 | 0.409985  | 0.4930075 | 16.238   | turquoise | 656.52 | 206.5127 | 0.922039  | 0.025823 | 15.87     | --       |
| AK234203.1     | ALG3     | turquoise | 184.67 | 61.4281 | 0.567188  | 0.3186793 | 8.586    | turquoise | 687.49 | 176.2335 | 0.874767  | 0.052189 | 8.85      | 0.1747   |
| AK240472.1     | TMEM128  | turquoise | 449.44 | 147.738 | 0.899406  | 0.0377163 | 9.184    | turquoise | 903.17 | 267.9444 | 0.978633  | 0.003737 | 13.624    | 0.4455   |
| AK230965.1     | 7-Mar    | turquoise | 233.82 | 90.9022 | 0.736796  | 0.1555374 | 48.586   | turquoise | 836.36 | 245.8626 | 0.94829   | 0.014005 | 63.508    | 0.958    |
| AK237695.1     | NOP14    | turquoise | 240.49 | 94.3804 | 0.683648  | 0.2031532 | 19.862   | turquoise | 800.45 | 248.5563 | 0.963971  | 0.008165 | 19.636    | 0.3033   |
| AK234971.1     | UBLCP1   | turquoise | 319.23 | 60.757  | -0.10516  | 0.8663509 | 15.382   | turquoise | 472.65 | 140.0084 | 0.784258  | 0.11632  | 29.092    | 0        |
| AK235143.1     | SPRY1    | turquoise | 558.19 | 173.654 | 0.924788  | 0.0244795 | 20.974   | turquoise | 906.12 | 267.1722 | 0.980388  | 0.003287 | 20.914    | --       |
| AK235559.1     | HMGCS1   | turquoise | 961.35 | 222.766 | 0.966183  | 0.0074271 | 12.178   | turquoise | 270.04 | 90.70309 | 0.661759  | 0.223773 | 13.35     | 99       |
| AK232198.1     | CHMP2A   | turquoise | 481.3  | 115.898 | 0.747602  | 0.1463172 | 44.358   | turquoise | 912.4  | 269.9884 | 0.990629  | 0.001088 | 46.164    | --       |
| AK238708.1     | CHKB     | turquoise | 823.77 | 195.309 | 0.936451  | 0.0190465 | 14.924   | turquoise | 937.68 | 269.1982 | 0.986133  | 0.001956 | 14.814    | --       |
| AK235833.1     | BECN1    | turquoise | 350.39 | 88.8043 | 0.666388  | 0.2193667 | 25.958   | turquoise | 716.15 | 196.0669 | 0.905068  | 0.034608 | 33.16     | 0        |
| AK239232.1     | WDR43    | turquoise | 1014.6 | 220.032 | 0.951644  | 0.0126717 | 3.422    | turquoise | 317.17 | 75.39473 | 0.578632  | 0.306736 | 8.03      | 0        |
| AK239332.1     | DNAJC2   | turquoise | 199    | 80.0624 | 0.673421  | 0.2127183 | 12.642   | turquoise | 619.93 | 191.2033 | 0.885837  | 0.045503 | 12.496    | 99       |
| AK230619.1     | PSMA2    | turquoise | 321.01 | 85.3654 | 0.634025  | 0.2506691 | 114.394  | turquoise | 435.1  | 144.7477 | 0.757608  | 0.137928 | 164.238   | 99       |
| AK236414.1     |          | turquoise | 440.68 | 145.305 | 0.861773  | 0.0603959 | 3.124    | turquoise | 390.3  | 117.6271 | 0.733465  | 0.158413 | 0.77      | --       |
| AK236435.1     | WDR13    | turquoise | 765.39 | 195.297 | 0.944809  | 0.0154352 | 28.692   | turquoise | 836.11 | 251.265  | 0.951495  | 0.01273  | 33.88     | 99       |
| AK239497.1     | SFRS3    | turquoise | 348.46 | 127.344 | 0.841002  | 0.0742647 | 93.74    | turquoise | 939.04 | 268.1922 | 0.985717  | 0.002045 | 80.656    | 99       |
| AK239575.1     | ALAS1    | turquoise | 901.04 | 207.91  | 0.944383  | 0.0156129 | 43.926   | turquoise | 568.6  | 159.0518 | 0.828777  | 0.082831 | 52.36     | 0        |
| AK236576.1     | PDIA4    | turquoise | 311.61 | 114.85  | 0.740524  | 0.1523385 | 54.728   | turquoise | 883.38 | 259.0503 | 0.976158  | 0.004404 | 58.488    | 0.0555   |
| AK233711.1     | CHRAC1   | turquoise | 588.65 | 178.271 | 0.926751  | 0.0235346 | 24.932   | turquoise | 895.79 | 265.724  | 0.97432   | 0.004921 | 32.948    | 0.4391   |
| AK240234.1     | CENPB    | turquoise | 275.11 | 56.8591 | -0.14646  | 0.8141956 | 12.592   | turquoise | 249.12 | 74.46514 | 0.592759  | 0.292158 | 17.068    | 0        |
| AK240271.1     | MRPS7    | turquoise | 190.82 | 71.6527 | 0.551538  | 0.3351954 | 15.072   | turquoise | 424.09 | 140.9647 | 0.802686  | 0.102042 | 10.174    | 99       |
| AK240329.1     | HSPA4    | turquoise | 573.33 | 149.041 | 0.871368  | 0.0542996 | 89.024   | turquoise | 621.43 | 186.2646 | 0.897353  | 0.038864 | 135.398   | 99       |
| AK233834.1     |          | turquoise | 338.71 | 121.772 | 0.799351  | 0.104584  | 5.984    | turquoise | 410.91 | 105.5495 | 0.708312  | 0.180606 | 2.866     | --       |
| AK233903.1     | MTCH2    | turquoise | 577.26 | 140.299 | 0.833594  | 0.0794215 | 50.144   | turquoise | 779.18 | 218.7436 | 0.920961  | 0.026356 | 42.264    | 0        |
| NM_001105302.1 | ACLY     | turquoise | 1012.9 | 216.017 | 0.942766  | 0.0162951 | 4.48     | turquoise | 357.47 | 102.2602 | 0.675528  | 0.210738 | 10.65     | 0        |
| NM_001114670.1 | TYK2     | turquoise | 286.51 | 105.263 | 0.736359  | 0.1559139 | 23.504   | turquoise | 738.07 | 211.3445 | 0.929929  | 0.02203  | 20.664    | 0        |
| NM_001123204.1 | TNXB     | turquoise | 354.14 | 112.669 | 0.739038  | 0.1536116 | 28.176   | turquoise | 573.23 | 191.6279 | 0.842348  | 0.073339 | 23.908    | 0        |
| XM_001927795.1 | HSPA5    | turquoise | 975.1  | 217.967 | 0.95281   | 0.0122184 | 8.902    | turquoise | 609.24 | 141.9283 | 0.812571  | 0.094621 | 16.172    | 0        |
| XM_001927936.1 | PTGES2   | turquoise | 579.5  | 178.228 | 0.941561  | 0.0168091 | 35.348   | turquoise | 872.52 | 249.2187 | 0.958869  | 0.009951 | 28.282    | 0        |
| XM_001926719.1 | SETX     | turquoise | 430.95 | 59.723  | 0.084581  | 0.8924366 | 15.306   | turquoise | 283.01 | 89.53385 | 0.696456  | 0.191351 | 19.76     | --       |
| XM_001925347.1 | HSDL2    | turquoise | 918.14 | 210.706 | 0.952252  | 0.0124345 | 100.61   | turquoise | 841.43 | 261.4295 | 0.960156  | 0.00949  | 173.606   | 0.0914   |
| XM_001924679.1 | AK3      | turquoise | 854.6  | 213.909 | 0.955485  | 0.0111988 | 40.152   | turquoise | 481.9  | 136.4363 | 0.776797  | 0.122259 | 54.886    | --       |

|                |           |           |        |         |          |           |         |           |        |          |          |          |         |        |
|----------------|-----------|-----------|--------|---------|----------|-----------|---------|-----------|--------|----------|----------|----------|---------|--------|
| XM_001926714.1 | KIAA1370  | turquoise | 947.42 | 213.678 | 0.948532 | 0.0139078 | 11.468  | turquoise | 455.61 | 151.5248 | 0.774891 | 0.12379  | 9.778   | 0.1049 |
| XM_001927594.1 | SYNCRIP   | turquoise | 124.05 | 46.2392 | 0.554797 | 0.331739  | 56.57   | turquoise | 898.61 | 261.1916 | 0.97454  | 0.004858 | 65.772  | --     |
| XM_001927804.1 | NDUFB9    | turquoise | 667.66 | 191.572 | 0.938471 | 0.0181511 | 186.116 | turquoise | 805.33 | 238.8847 | 0.948993 | 0.013722 | 260.366 | 0      |
| XM_001928441.1 | RAD21     | turquoise | 946.63 | 208.519 | 0.93816  | 0.018288  | 8.218   | turquoise | 251.03 | 54.84132 | 0.524011 | 0.364743 | 18.726  | 0      |
| XM_001925389.1 | EIF3E     | turquoise | 492.77 | 59.6107 | 0.222703 | 0.7188075 | 175.628 | turquoise | 345.91 | 105.15   | 0.714741 | 0.174854 | 312.33  | 0      |
| XM_001927740.1 | CYR61     | turquoise | 683.41 | 137.805 | 0.804247 | 0.1008593 | 34.222  | turquoise | 896.01 | 250.7414 | 0.968781 | 0.00659  | 34.93   | 0      |
| XM_001928544.1 | DDX20     | turquoise | 109.02 | 31.3034 | 0.442012 | 0.4561175 | 5.21    | turquoise | 935.63 | 269.3665 | 0.986139 | 0.001955 | 3.656   | 0.1079 |
| XM_001925670.1 | SARS      | turquoise | 792.35 | 204.756 | 0.964885 | 0.0078573 | 109.568 | turquoise | 305.02 | 70.20101 | 0.60927  | 0.275356 | 100.412 | 0.0838 |
| XM_001929116.1 | MTDH      | turquoise | 224.55 | 91.4636 | 0.688832 | 0.1983526 | 73.85   | turquoise | 483.21 | 97.82447 | 0.722893 | 0.167639 | 98.864  | 99     |
| XM_001929293.1 | PAN2      | turquoise | 221.64 | 82.8927 | 0.677987 | 0.2084329 | 33.104  | turquoise | 855.97 | 250.2532 | 0.968856 | 0.006567 | 27.42   | 0      |
| XM_001927985.1 | PSMC1     | turquoise | 209.35 | 81.444  | 0.596664 | 0.2881605 | 43.488  | turquoise | 676.22 | 223.6746 | 0.900047 | 0.03736  | 35.632  | 0      |
| XM_001928723.1 | THTPA     | turquoise | 456.51 | 60.3642 | 0.150325 | 0.809324  | 8.966   | turquoise | 407.84 | 130.382  | 0.761271 | 0.134894 | 8.2     | 99     |
| XM_001928863.1 | MESDC2    | turquoise | 991.77 | 206.097 | 0.927385 | 0.0232318 | 17.856  | turquoise | 735.82 | 239.7511 | 0.923612 | 0.025051 | 13.1    | 0      |
| XM_001929558.1 | CDKN1A    | turquoise | 947.47 | 221.843 | 0.967485 | 0.0070037 | 117.254 | turquoise | 555.5  | 155.7062 | 0.819394 | 0.089599 | 151.278 | 0.6194 |
| XM_001928226.1 | MTUS2     | turquoise | 1010.9 | 218.181 | 0.949981 | 0.0133275 | 9.51    | turquoise | 859.58 | 259.4316 | 0.961822 | 0.008903 | 2.08    | 0      |
| XM_001925192.1 | TM9SF3    | turquoise | 1001.3 | 211.528 | 0.934915 | 0.0197363 | 37.77   | turquoise | 415.34 | 100.9028 | 0.691268 | 0.196108 | 66.71   | 99     |
| XM_001928393.1 | GBF1      | turquoise | 176.6  | 52.8011 | 0.450719 | 0.446197  | 51.124  | turquoise | 524.57 | 173.6621 | 0.85884  | 0.062299 | 48.172  | 0      |
| XM_001928522.1 | CCAR1     | turquoise | 615.07 | 166.621 | 0.877884 | 0.0502775 | 28.306  | turquoise | 343.61 | 83.94843 | 0.624236 | 0.260356 | 36.238  | 99     |
| XM_001927977.1 | ATAD1     | turquoise | 1013.5 | 201.897 | 0.915951 | 0.0288789 | 33.294  | turquoise | 813.13 | 254.3394 | 0.954169 | 0.011697 | 33.974  | 0      |
| XM_001925080.1 | PPA1      | turquoise | 367.37 | 119.167 | 0.832565 | 0.0801461 | 126.154 | turquoise | 388.17 | 106.8504 | 0.704715 | 0.183847 | 143.644 | 0      |
| XM_001929420.1 | ARPC3     | turquoise | 464.91 | 139.74  | 0.81859  | 0.090186  | 20.542  | turquoise | 783.79 | 241.4019 | 0.960376 | 0.009412 | 14.136  | 0      |
| XM_001929554.1 | ACAD10    | turquoise | 830.99 | 211.194 | 0.966658 | 0.0072717 | 9.804   | turquoise | 802.05 | 247.9118 | 0.947847 | 0.014185 | 13.284  | 0      |
| XM_001927490.1 | EIF4ENIF1 | turquoise | 745.37 | 189.682 | 0.915638 | 0.0290389 | 7.862   | turquoise | 645.18 | 162.3767 | 0.847142 | 0.070073 | 10.028  | 0      |
| XM_001927890.1 | TLK1      | turquoise | 974.09 | 225.798 | 0.971459 | 0.0057633 | 9.248   | turquoise | 857.47 | 261.7199 | 0.975835 | 0.004493 | 11.026  | 0      |
| XM_001928282.1 | NXT1      | turquoise | 103.18 | 27.1654 | 0.397724 | 0.5072895 | 9.698   | turquoise | 287.52 | 95.77145 | 0.680425 | 0.206154 | 9.332   | --     |
| NM_214313.1    | TXN       | turquoise | 423.17 | 145.167 | 0.86939  | 0.0555393 | 11.838  | turquoise | 892.06 | 269.3166 | 0.984846 | 0.002234 | 15.852  | --     |
| NM_214366.1    | PPP2CA    | turquoise | 405.75 | 122.401 | 0.773052 | 0.1252732 | 75.766  | turquoise | 747.64 | 231.0484 | 0.92425  | 0.024741 | 68.288  | 99     |
| NM_001004031.1 | DSTN      | turquoise | 761.24 | 194.821 | 0.936418 | 0.0190614 | 14.142  | turquoise | 894.51 | 259.7755 | 0.970251 | 0.006132 | 18.472  | 99     |
| AY609399.1     | TMED7     | turquoise | 901.19 | 212.918 | 0.95689  | 0.010675  | 18.658  | turquoise | 261.07 | 76.14398 | 0.603127 | 0.281577 | 27.512  | 99     |
| AY609974.1     | FAM136A   | turquoise | 952.23 | 201.296 | 0.923115 | 0.0252941 | 20.48   | turquoise | 332.32 | 93.231   | 0.642966 | 0.241908 | 29.728  | 99     |
| AY610044.1     | MRPL35    | turquoise | 831.25 | 219.039 | 0.985161 | 0.002165  | 12.016  | turquoise | 873.36 | 264.4251 | 0.977083 | 0.00415  | 11.634  | 99     |
| AY610394.1     | NDUFS4    | turquoise | 357.19 | 87.9317 | 0.669838 | 0.2160983 | 140.36  | turquoise | 406.81 | 137.591  | 0.786651 | 0.114435 | 153.256 | 99     |
| NM_001032379.1 | MOBK13    | turquoise | 884.66 | 204.636 | 0.934325 | 0.0200035 | 34.302  | turquoise | 896.85 | 255.6207 | 0.970243 | 0.006134 | 49.376  | --     |
| CF787035       |           | turquoise | 767.73 | 203.106 | 0.945091 | 0.0153175 | 13.918  | turquoise | 488.32 | 142.8108 | 0.814999 | 0.092824 | 0.542   | --     |
| BX668358       |           | turquoise | 903.27 | 220.914 | 0.971078 | 0.0058786 | 6.13    | turquoise | 219.14 | 55.46054 | 0.506428 | 0.38393  | 8.346   | --     |
| BX671573       |           | turquoise | 837.78 | 208.453 | 0.961252 | 0.0091026 | 15.058  | turquoise | 895.27 | 268.5184 | 0.981749 | 0.002952 | 13.14   | --     |

|          |           |        |         |          |           |         |           |        |          |          |          |         |    |    |
|----------|-----------|--------|---------|----------|-----------|---------|-----------|--------|----------|----------|----------|---------|----|----|
| BX672533 | turquoise | 1018.4 | 211.628 | 0.935379 | 0.0195273 | 21.412  | turquoise | 824.95 | 239.1237 | 0.946015 | 0.014935 | 23.752  | -- |    |
| BP157493 | turquoise | 183.26 | 74.4391 | 0.655374 | 0.2298913 | 41.746  | turquoise | 911.8  | 269.3984 | 0.981831 | 0.002932 | 41.806  | -- | 99 |
| CK450204 | turquoise | 946.51 | 218.673 | 0.954331 | 0.0116351 | 9.514   | turquoise | 896.13 | 266.9646 | 0.976668 | 0.004263 | 21.746  | -- |    |
| CK456864 | turquoise | 939.47 | 222.43  | 0.971485 | 0.0057553 | 4.276   | turquoise | 880.27 | 266.2789 | 0.974211 | 0.004952 | 4.634   | -- |    |
| CK461574 | turquoise | 516.33 | 164.157 | 0.898965 | 0.0379619 | 28.418  | turquoise | 141.14 | 36.62453 | 0.462705 | 0.432621 | 21.414  | -- |    |
| CK463357 | turquoise | 241.23 | 52.802  | 0.516411 | 0.3730068 | 88.486  | turquoise | 461.22 | 125.9089 | 0.750051 | 0.14425  | 108.706 | -- |    |
| BX920663 | turquoise | 255.97 | 102.206 | 0.723994 | 0.1666709 | 111.7   | turquoise | 825    | 257.2863 | 0.959166 | 0.009844 | 132.252 | -- |    |
| BX920963 | turquoise | 612.16 | 153.852 | 0.839214 | 0.0754993 | 25.242  | turquoise | 586.16 | 188.9481 | 0.859988 | 0.061552 | 21.55   | -- | 99 |
| CN158394 | turquoise | 704.72 | 173.949 | 0.905021 | 0.034633  | 10.67   | turquoise | 882.94 | 266.5531 | 0.978866 | 0.003677 | 19.516  | -- |    |
| CN158718 | turquoise | 177.48 | 43.6328 | -0.33255 | 0.5845248 | 20.984  | turquoise | 635.9  | 163.9899 | 0.853326 | 0.065928 | 36.402  | -- |    |
| CN162178 | turquoise | 507.02 | 164.415 | 0.910593 | 0.0316577 | 18.264  | turquoise | 650.69 | 207.3475 | 0.920493 | 0.026589 | 15.312  | -- |    |
| CJ013877 | turquoise | 362.9  | 55.1492 | 0.031399 | 0.960028  | 51.278  | turquoise | 307.25 | 102.5066 | 0.658928 | 0.22648  | 43.496  | -- |    |
| DN106431 | turquoise | 982.9  | 217.308 | 0.948732 | 0.0138272 | 9.52    | turquoise | 880.97 | 249.652  | 0.961509 | 0.009013 | 13.812  | -- |    |
| DN111105 | turquoise | 187.7  | 67.4705 | 0.611662 | 0.2729441 | 133.324 | turquoise | 515.68 | 167.2715 | 0.834617 | 0.078703 | 92.826  | -- |    |
| DN116574 | turquoise | 637.84 | 164.927 | 0.881368 | 0.0481672 | 69.196  | turquoise | 811.69 | 254.4919 | 0.950359 | 0.013178 | 100.722 | -- |    |
| DV896278 | turquoise | 126.91 | 42.9393 | 0.517943 | 0.3713375 | 9.376   | turquoise | 831.9  | 258.8999 | 0.955723 | 0.011109 | 8.582   | -- |    |
| CX058367 | turquoise | 288.73 | 59.2928 | -0.154   | 0.8047013 | 6.834   | turquoise | 412.61 | 89.51171 | 0.703541 | 0.184908 | 9.934   | -- |    |
| CX062690 | turquoise | 841.61 | 217.999 | 0.973528 | 0.0051496 | 50.454  | turquoise | 472.56 | 157.7407 | 0.814865 | 0.092923 | 54.938  | -- |    |
| DT327101 | turquoise | 261.21 | 57.0846 | -0.22362 | 0.7176676 | 8.336   | turquoise | 606.42 | 161.2895 | 0.837129 | 0.076948 | 15.332  | -- |    |
| EV877159 | turquoise | 993.29 | 218.678 | 0.952368 | 0.0123896 | 23.764  | turquoise | 975.5  | 269.3662 | 0.999052 | 3.50E-05 | 31.762  | -- | 99 |
| EV987119 | turquoise | 190.7  | 70.8802 | 0.675028 | 0.2112075 | 9.686   | turquoise | 694.48 | 228.5037 | 0.902358 | 0.036085 | 9.482   | -- |    |
| EW115068 | turquoise | 652.49 | 176.079 | 0.91477  | 0.0294842 | 467.066 | turquoise | 703.73 | 230.9099 | 0.908138 | 0.032958 | 477.274 | -- | 0  |
| EW129557 | turquoise | 863.03 | 218.287 | 0.968869 | 0.0065628 | 27.338  | turquoise | 823.75 | 259.9122 | 0.957613 | 0.010409 | 20.04   | -- |    |
| EW189192 | turquoise | 892.82 | 224.555 | 0.982596 | 0.0027489 | 9.25    | turquoise | 519.43 | 175.3641 | 0.828255 | 0.083204 | 8.262   | -- |    |
| EW225826 | turquoise | 223.31 | 61.871  | 0.52192  | 0.3670119 | 26.222  | turquoise | 301.75 | 99.66471 | 0.67864  | 0.207822 | 36.45   | -- |    |
| EW329931 | turquoise | 247.21 | 93.8243 | 0.689396 | 0.1978323 | 10.782  | turquoise | 562.11 | 170.2719 | 0.842422 | 0.073289 | 4.834   | -- |    |
| EW582873 | turquoise | 210.18 | 48.4952 | -0.30245 | 0.6208603 | 6.088   | turquoise | 330.85 | 68.76115 | 0.61729  | 0.26729  | 11.618  | -- |    |
| EW590143 | turquoise | 218.05 | 81.1919 | 0.667192 | 0.2186037 | 340.864 | turquoise | 765.49 | 243.1828 | 0.941761 | 0.016724 | 318.036 | -- | 99 |
| EW610844 | turquoise | 842.52 | 184.268 | 0.889791 | 0.0431865 | 5.16    | turquoise | 505.72 | 129.5425 | 0.75485  | 0.140226 | 7.988   | -- |    |
| EW656756 | turquoise | 809.58 | 213.473 | 0.973363 | 0.0051977 | 12.518  | turquoise | 862.81 | 261.3067 | 0.963849 | 0.008206 | 18.18   | -- |    |
| EW659558 | turquoise | 901.47 | 220.562 | 0.970079 | 0.006185  | 8.486   | turquoise | 448.6  | 150.1521 | 0.83201  | 0.080538 | 7.952   | -- |    |
| EW671387 | turquoise | 399.82 | 138.376 | 0.858713 | 0.0623821 | 4.5     | turquoise | 597.53 | 172.122  | 0.859544 | 0.061841 | 7.172   | -- | 99 |

Table S5-1. GO annotation analysis of the module eigengene in the common module between LT and LDE (prenatal\_brown vs blue).

| GO ID      | GO Name                                                                         | Total Count | Diff Count | P Value     | FDR         | Gene            |
|------------|---------------------------------------------------------------------------------|-------------|------------|-------------|-------------|-----------------|
| GO:0007220 | Notch receptor processing                                                       | 1           | 1          | 0.000843036 | 0.014612621 | [APH1A]         |
| GO:0031293 | membrane protein intracellular domain proteolysis                               | 1           | 1          | 0.000843036 | 0.014612621 | [APH1A]         |
| GO:0043148 | mitotic spindle stabilization                                                   | 1           | 1          | 0.000843036 | 0.014612621 | [SBDS]          |
| GO:0010611 | regulation of cardiac muscle hypertrophy                                        | 1           | 1          | 0.000843036 | 0.014612621 | [LMCD1]         |
| GO:0070072 | vacuolar proton-transporting V-type ATPase complex assembly                     | 1           | 1          | 0.000843036 | 0.014612621 | [VMA21]         |
| GO:0032464 | positive regulation of protein homooligomerization                              | 2           | 1          | 0.00168538  | 0.010954971 | [GNB2L1]        |
| GO:0070886 | positive regulation of calcineurin-NFAT signaling cascade                       | 2           | 1          | 0.00168538  | 0.010954971 | [LMCD1]         |
| GO:0051302 | regulation of cell division                                                     | 2           | 1          | 0.00168538  | 0.010954971 | [GNB2L1]        |
| GO:0050765 | negative regulation of phagocytosis                                             | 2           | 1          | 0.00168538  | 0.010954971 | [GNB2L1]        |
| GO:0042987 | amyloid precursor protein catabolic process                                     | 2           | 1          | 0.00168538  | 0.010954971 | [APH1A]         |
| GO:0006364 | rRNA processing                                                                 | 80          | 2          | 0.00209657  | 0.009911056 | [SBDS, UTP18]   |
| GO:0048539 | bone marrow development                                                         | 3           | 1          | 0.002527034 | 0.010108134 | [SBDS]          |
| GO:0042256 | mature ribosome assembly                                                        | 3           | 1          | 0.002527034 | 0.010108134 | [SBDS]          |
| GO:0031340 | positive regulation of vesicle fusion                                           | 3           | 1          | 0.002527034 | 0.010108134 | [ANXA1]         |
| GO:0071569 | protein ufmylation                                                              | 4           | 1          | 0.003367996 | 0.010945989 | [UFM1]          |
| GO:0009303 | rRNA transcription                                                              | 4           | 1          | 0.003367996 | 0.010945989 | [RNASEK]        |
| GO:0016071 | mRNA metabolic process                                                          | 4           | 1          | 0.003367996 | 0.010945989 | [PCBP1]         |
| GO:0006950 | response to stress                                                              | 104         | 2          | 0.003508686 | 0.010136203 | [HSPA4, HSPB11] |
| GO:0030595 | leukocyte chemotaxis                                                            | 5           | 1          | 0.00420827  | 0.011222052 | [SBDS]          |
| GO:0043547 | positive regulation of GTPase activity                                          | 5           | 1          | 0.00420827  | 0.011222052 | [GNB2L1]        |
| GO:2000543 | positive regulation of gastrulation                                             | 6           | 1          | 0.005047853 | 0.012499446 | [GNB2L1]        |
| GO:0032880 | regulation of protein localization                                              | 7           | 1          | 0.005886748 | 0.013604929 | [GNB2L1]        |
| GO:2000114 | regulation of establishment of cell polarity                                    | 7           | 1          | 0.005886748 | 0.013604929 | [GNB2L1]        |
| GO:0045332 | phospholipid translocation                                                      | 10          | 1          | 0.008399306 | 0.018198497 | [ATP11A]        |
| GO:0018149 | peptide cross-linking                                                           | 11          | 1          | 0.009235452 | 0.019209739 | [ANXA1]         |
| GO:0032436 | positive regulation of proteasomal ubiquitin-dependent protein catabolic proces | 12          | 1          | 0.010070911 | 0.020141822 | [GNB2L1]        |
| GO:0030282 | bone mineralization                                                             | 13          | 1          | 0.010905685 | 0.021003542 | [SBDS]          |
| GO:0017148 | negative regulation of translation                                              | 14          | 1          | 0.011739774 | 0.021802438 | [GNB2L1]        |
| GO:2001244 | positive regulation of intrinsic apoptotic signaling pathway                    | 15          | 1          | 0.012573179 | 0.022162891 | [GNB2L1]        |
| GO:0048511 | rhythmic process                                                                | 15          | 1          | 0.012573179 | 0.022162891 | [GNB2L1]        |
| GO:0006164 | purine nucleotide biosynthetic process                                          | 16          | 1          | 0.013405899 | 0.022487315 | [ATIC]          |
| GO:0030178 | negative regulation of Wnt receptor signaling pathway                           | 17          | 1          | 0.014237937 | 0.023136648 | [GNB2L1]        |

|            |                                                |      |   |             |                             |
|------------|------------------------------------------------|------|---|-------------|-----------------------------|
| GO:0001934 | positive regulation of protein phosphorylation | 21   | 1 | 0.017559265 | 0.027669145 [GNB2L1]        |
| GO:0051726 | regulation of cell cycle                       | 22   | 1 | 0.018387894 | 0.028122662 [GNB2L1]        |
| GO:0006464 | protein modification process                   | 24   | 1 | 0.020043113 | 0.02977834 [RABGGTB]        |
| GO:0030216 | keratinocyte differentiation                   | 29   | 1 | 0.024169289 | 0.034911195 [ANXA1]         |
| GO:0044419 | interspecies interaction between organisms     | 315  | 2 | 0.028992994 | 0.04074691 [GNB2L1, YWHAE]  |
| GO:0006986 | response to unfolded protein                   | 35   | 1 | 0.029098389 | 0.039818848 [HSPA4]         |
| GO:0051781 | positive regulation of cell division           | 41   | 1 | 0.034003261 | 0.045337682 [TGFB3]         |
| GO:0030335 | positive regulation of cell migration          | 46   | 1 | 0.038072231 | 0.0494939 [GNB2L1]          |
| GO:0015031 | protein transport                              | 383  | 2 | 0.041389456 | 0.052493944 [SFT2D1, TRAM1] |
| GO:0040008 | regulation of growth                           | 51   | 1 | 0.042124523 | 0.052154171 [GNB2L1]        |
| GO:0030308 | negative regulation of cell growth             | 58   | 1 | 0.047769838 | 0.057768177 [GNB2L1]        |
| GO:0043065 | positive regulation of apoptotic process       | 83   | 1 | 0.067668638 | 0.079972027 [GNB2L1]        |
| GO:0006916 | anti-apoptosis                                 | 84   | 1 | 0.068456116 | 0.079104845 [ANXA1]         |
| GO:0008283 | cell proliferation                             | 90   | 1 | 0.073167412 | 0.082710987 [SBDS]          |
| GO:0006412 | translation                                    | 130  | 1 | 0.103988828 | 0.115051469 [RPSA]          |
| GO:0007165 | signal transduction                            | 141  | 1 | 0.112288379 | 0.121645743 [ANXA1]         |
| GO:0006355 | regulation of transcription, DNA-dependent     | 1254 | 2 | 0.285547206 | 0.303029688 [ELOF1, LMCD1]  |
| GO:0006508 | proteolysis                                    | 476  | 1 | 0.332117804 | 0.345402516 [TMPRSS11F]     |
| GO:0008150 | biological_process                             | 588  | 1 | 0.393021433 | 0.400727736 [PDGFRL]        |
| GO:0007275 | multicellular organismal development           | 822  | 1 | 0.503333661 | 0.503333661 [GNB2L1]        |

---

Table S5-2. GO annotation analysis of the module eigengene in the common module between LT and LDE (prenatal\_turquoise vs turquoise).

| GO ID      | GO Name                                             | Total Count | Diff Count | P Value     | FDR      | Gene                                                                                                                                                                                                         |
|------------|-----------------------------------------------------|-------------|------------|-------------|----------|--------------------------------------------------------------------------------------------------------------------------------------------------------------------------------------------------------------|
| GO:0044419 | interspecies interaction between organisms          | 315         | 15         | 5.63104E-07 | 0.000402 | [AMBP, ATP6V1H, BNIP3L, COPB1, FBXL2, HCFC1, HMGA1, MAGI3, MAPK3, SLC25A5, SRC, TBK1, TSPAN7, USP7, WWP2]                                                                                                    |
| GO:0008219 | cell death                                          | 136         | 10         | 9.37612E-07 | 0.000335 | [ANO10, APP, ATL1, CLN5, DCTN1, HEXB, KIAA0196, PPP2R2B, SNCA, UCHL1]                                                                                                                                        |
| GO:0043066 | negative regulation of apoptotic process            | 118         | 9          | 2.42613E-06 | 0.000577 | [BMP4, BNIP3L, FAM129B, GATA6, LEF1, PTK2, SFRP1, THBS1, WT1]                                                                                                                                                |
| GO:0045892 | negative regulation of transcription, DNA-dependent | 284         | 13         | 4.8956E-06  | 0.000874 | [AES, BASP1, BMP4, CBX3, DKK3, GATA6, HEY2, HMGA1, LEF1, RING1, SFRP1, TWIST2, WT1]                                                                                                                          |
| GO:0045595 | regulation of cell differentiation                  | 16          | 4          | 1.43891E-05 | 0.002055 | [FADS1, PPP2CA, PPP2R1A, TCFL5]                                                                                                                                                                              |
| GO:0030308 | negative regulation of cell growth                  | 58          | 6          | 2.10525E-05 | 0.002505 | [BTG1, HYAL2, PPP2CA, PPP2R1A, SFRP1, WT1]                                                                                                                                                                   |
| GO:0006355 | regulation of transcription, DNA-dependent          | 1254        | 29         | 2.18593E-05 | 0.00223  | [AFF3, ASXL1, BCL11A, BTG1, CCAR1, CDK8, CDK9, CHD3, DDX1, FADS1, HABP4, HCFC1, HDAC2, HOXB7, HOXC4, MEAF6, MORF4L2, MXI1, NCOA2, PIAS3, PPP2CA, PPP2R1A, TCEAL2, TCFL5, WT1, ZNF34, ZNF516, ZNF618, ZNF644] |
| GO:0015031 | protein transport                                   | 383         | 14         | 2.69312E-05 | 0.002404 | [ARF3, LSG1, NECAP2, NUP50, NUP93, RAB18, RAB1A, RAB3A, RAB5C, SCAMP4, SEC22B, SEC61A1, STXBP1, VPS4B]                                                                                                       |
| GO:0008285 | negative regulation of cell proliferation           | 102         | 7          | 6.36647E-05 | 0.005051 | [BTG1, HMGA1, SFRP1, SOX4, TES, TMEM127, WT1]                                                                                                                                                                |
| GO:0007275 | multicellular organismal development                | 822         | 21         | 6.4994E-05  | 0.004641 | [CSRP2, DDX1, DKK3, DZIP1, EPHA4, FZD5, GAP43, HOXB7, HOXC4, HOXD3, ID2, INA, LECT1, NNAT, OLFM1, PDGFRB, RAB18, TCFL5, TRIM54, TWIST2, USP7]                                                                |
| GO:0016568 | chromatin modification                              | 221         | 10         | 6.64458E-05 | 0.004313 | [ASXL1, CHD3, DEK, DNMT1, HDAC2, HIRA, MEAF6, MORF4L2, RING1, UIMC1]                                                                                                                                         |
| GO:0007155 | cell adhesion                                       | 420         | 14         | 7.25562E-05 | 0.004317 | [AMBP, APP, CADM3, CN1N1, COL8A1, EPHA4, FLRT2, ITGB5, NEO1, NLGN3, PTPRF, SRC, TNC, TRCI]                                                                                                                   |
| GO:0006464 | protein modification process                        | 24          | 4          | 7.90118E-05 | 0.00434  | [CPE, MAN2B1, PLOD1, WDYHV1]                                                                                                                                                                                 |
| GO:0007356 | thorax and anterior abdomen determination           | 2           | 2          | 9.35521E-05 | 0.004175 | [BASP1, WT1]                                                                                                                                                                                                 |



|            |                                                                                                         |     |    |             |                                                                                  |
|------------|---------------------------------------------------------------------------------------------------------|-----|----|-------------|----------------------------------------------------------------------------------|
| GO:2000060 | positive regulation of protein ubiquitination involved in ubiquitin-dependent protein catabolic process | 2   | 2  | 9.35521E-05 | 0.004175 [CLU, PTK2]                                                             |
| GO:0060421 | positive regulation of heart growth                                                                     | 2   | 2  | 9.35521E-05 | 0.004175 [BASP1, WT1]                                                            |
| GO:0010994 | free ubiquitin chain polymerization                                                                     | 2   | 2  | 9.35521E-05 | 0.004175 [UBE2C, UBE2S]                                                          |
| GO:2001076 | positive regulation of metanephric ureteric bud development                                             | 2   | 2  | 9.35521E-05 | 0.004175 [BASP1, WT1]                                                            |
| GO:0048661 | positive regulation of smooth muscle cell proliferation                                                 | 10  | 3  | 0.000102865 | 0.003766 [BMP4, ID2, PDGFRB]                                                     |
| GO:0006378 | mRNA polyadenylation                                                                                    | 10  | 3  | 0.000102865 | 0.003766 [APP, NUDT21, PABPC1]                                                   |
| GO:0051216 | cartilage development                                                                                   | 26  | 4  | 0.000109475 | 0.003722 [HOXD3, HYAL2, LECT1, SULF2]                                            |
| GO:0010629 | negative regulation of gene expression                                                                  | 27  | 4  | 0.000127534 | 0.004139 [HEY2, ID2, SFRP1, WWP2]                                                |
| GO:0043065 | positive regulation of apoptotic process                                                                | 83  | 6  | 0.000160203 | 0.004973 [BMP4, CLU, MLLT11, MTCH1, SFRP1, SOX4]                                 |
| GO:0016925 | protein sumoylation                                                                                     | 12  | 3  | 0.000185884 | 0.005417 [BCL11A, PIAS3, SUMO2]                                                  |
| GO:0032436 | positive regulation of proteasomal ubiquitin-dependent protein catabolic process                        | 12  | 3  | 0.000185884 | 0.005417 [CLU, CSNK1E, SUMO2]                                                    |
| GO:0007219 | Notch signaling pathway                                                                                 | 30  | 4  | 0.000194633 | 0.005345 [APP, CNTN1, HEY2, HOXD3]                                               |
| GO:0072112 | glomerular visceral epithelial cell differentiation                                                     | 3   | 2  | 0.000278853 | 0.007111 [BASP1, WT1]                                                            |
| GO:0042518 | negative regulation of tyrosine phosphorylation of Stat3 protein                                        | 3   | 2  | 0.000278853 | 0.007111 [PPP2CA, PPP2R1A]                                                       |
| GO:0019932 | second-messenger-mediated signaling                                                                     | 3   | 2  | 0.000278853 | 0.007111 [PPP2CA, PPP2R1A]                                                       |
| GO:0001701 | in utero embryonic development                                                                          | 14  | 3  | 0.000303154 | 0.007215 [EGFL8, FUT8, PTPRR]                                                    |
| GO:0045893 | positive regulation of transcription, DNA-dependent                                                     | 334 | 11 | 0.000466833 | 0.010752 [BMP4, FOXF2, HMGA1, ID2, LEF1, MLLT11, RNF10, SFRP1, SOX4, WT1, YWHAH] |
| GO:0016477 | cell migration                                                                                          | 67  | 5  | 0.000490579 | 0.010946 [BTG1, CD24, CDC42BPA, FMNL3, PDGFRB]                                   |
| GO:0016192 | vesicle-mediated transport                                                                              | 104 | 6  | 0.0005433   | 0.011755 [ARF3, COPB1, ERGIC1, RAB1A, SEC22B, TRAPPC3]                           |
| GO:0045730 | respiratory burst                                                                                       | 4   | 2  | 0.000554125 | 0.010551 [CD24, CD55]                                                            |
| GO:0060539 | diaphragm development                                                                                   | 4   | 2  | 0.000554125 | 0.010551 [BASP1, WT1]                                                            |
| GO:0008406 | gonad development                                                                                       | 4   | 2  | 0.000554125 | 0.010551 [BASP1, WT1]                                                            |
| GO:0051491 | positive regulation of filopodium assembly                                                              | 4   | 2  | 0.000554125 | 0.010551 [DPYSL3, PALM]                                                          |
| GO:0032410 | negative regulation of transporter activity                                                             | 4   | 2  | 0.000554125 | 0.010551 [SNCA, WWP2]                                                            |
| GO:0060231 | mesenchymal to epithelial transition                                                                    | 4   | 2  | 0.000554125 | 0.010551 [BASP1, WT1]                                                            |
| GO:0031145 | anaphase-promoting complex-dependent proteasomal ubiquitin-dependent protein catabolic process          | 4   | 2  | 0.000554125 | 0.010551 [UBE2C, UBE2S]                                                          |
| GO:0010458 | exit from mitosis                                                                                       | 4   | 2  | 0.000554125 | 0.010551 [UBE2C, UBE2S]                                                          |

|            |                                                                                           |     |    |             |          |                                                                                     |
|------------|-------------------------------------------------------------------------------------------|-----|----|-------------|----------|-------------------------------------------------------------------------------------|
| GO:0007049 | cell cycle                                                                                | 405 | 12 | 0.00066839  | 0.011363 | [BECN1, CCAR1, GAS2, MAPK3, MARVELD1, NAE1, RALB, SEPT11, SRC, UBE2C, UBE2S, VPS4B] |
| GO:0008380 | RNA splicing                                                                              | 150 | 7  | 0.000682584 | 0.011334 | [PABPC1, PPIL1, PPP2CA, PPP2R1A, SNRPG, TRA2A, WT1]                                 |
| GO:0051291 | protein heterooligomerization                                                             | 5   | 2  | 0.000917616 | 0.014243 | [SCUBE3, SEPT11]                                                                    |
| GO:0008629 | induction of apoptosis by intracellular signals                                           | 5   | 2  | 0.000917616 | 0.014243 | [CD24, CLU]                                                                         |
| GO:0051488 | activation of anaphase-promoting complex activity                                         | 5   | 2  | 0.000917616 | 0.014243 | [UBE2C, UBE2S]                                                                      |
| GO:0071345 | cellular response to cytokine stimulus                                                    | 5   | 2  | 0.000917616 | 0.014243 | [CDK9, DPYSL3]                                                                      |
| GO:0045807 | positive regulation of endocytosis                                                        | 5   | 2  | 0.000917616 | 0.014243 | [CALY, SNCA]                                                                        |
| GO:0006917 | induction of apoptosis                                                                    | 79  | 5  | 0.001041465 | 0.015176 | [BNIP3L, PPP2CA, PPP2R1A, THBS1, WT1]                                               |
| GO:0006958 | complement activation, classical pathway                                                  | 22  | 3  | 0.001210898 | 0.017292 | [CD55, CLU, SERPING1]                                                               |
| GO:0006897 | endocytosis                                                                               | 83  | 5  | 0.001300105 | 0.018201 | [APP, ATP6V1H, NECAP2, RAB18, SH3GL3]                                               |
| GO:0010628 | positive regulation of gene expression                                                    | 49  | 4  | 0.001301956 | 0.017877 | [DNMT1, HCFC1, HOXD3, ID2]                                                          |
| GO:0030501 | positive regulation of bone mineralization                                                | 6   | 2  | 0.001367601 | 0.017917 | [BMP4, PTH]                                                                         |
| GO:0030325 | adrenal gland development                                                                 | 6   | 2  | 0.001367601 | 0.017917 | [DKK3, WT1]                                                                         |
| GO:0009267 | cellular response to starvation                                                           | 6   | 2  | 0.001367601 | 0.017917 | [FADS1, SFRP1]                                                                      |
| GO:0072075 | metanephric mesenchyme development                                                        | 6   | 2  | 0.001367601 | 0.017917 | [BASP1, WT1]                                                                        |
| GO:0040008 | regulation of growth                                                                      | 51  | 4  | 0.001512466 | 0.018946 | [GAP43, PPP2CA, PPP2R1A, SHC1]                                                      |
| GO:0043154 | negative regulation of cysteine-type endopeptidase activity involved in apoptotic process | 25  | 3  | 0.001770003 | 0.021789 | [LEF1, SNCA, THBS1]                                                                 |
| GO:0045453 | bone resorption                                                                           | 7   | 2  | 0.001902378 | 0.021733 | [PTH, SRC]                                                                          |
| GO:0046718 | entry of virus into host cell                                                             | 7   | 2  | 0.001902378 | 0.021733 | [HYAL2, WWP2]                                                                       |
| GO:0000188 | inactivation of MAPK activity                                                             | 7   | 2  | 0.001902378 | 0.021733 | [PPP2CA, PPP2R1A]                                                                   |
| GO:0007017 | microtubule-based process                                                                 | 7   | 2  | 0.001902378 | 0.021733 | [KIFAP3, TRIM54]                                                                    |
| GO:0006275 | regulation of DNA replication                                                             | 7   | 2  | 0.001902378 | 0.021733 | [PPP2CA, PPP2R1A]                                                                   |
| GO:0002244 | hemopoietic progenitor cell differentiation                                               | 7   | 2  | 0.001902378 | 0.021733 | [BMP4, SFRP1]                                                                       |
| GO:0016358 | dendrite development                                                                      | 7   | 2  | 0.001902378 | 0.021733 | [APP, HDAC2]                                                                        |
| GO:0030111 | regulation of Wnt receptor signaling pathway                                              | 7   | 2  | 0.001902378 | 0.021733 | [PPP2CA, PPP2R1A]                                                                   |
| GO:0090090 | negative regulation of canonical Wnt receptor signaling pathway                           | 27  | 3  | 0.002218976 | 0.023647 | [AES, LEF1, SFRP1]                                                                  |
| GO:0015992 | proton transport                                                                          | 28  | 3  | 0.002467534 | 0.025909 | [ATP6AP1, ATP6V1B2, ATP6V1H]                                                        |
| GO:0032836 | glomerular basement membrane development                                                  | 8   | 2  | 0.00252027  | 0.026079 | [SULF2, WT1]                                                                        |
| GO:0006417 | regulation of translation                                                                 | 59  | 4  | 0.002592476 | 0.026443 | [APP, GCN1L1, PA2G4, TNRC6A]                                                        |
| GO:0000398 | nuclear mRNA splicing, via spliceosome                                                    | 98  | 5  | 0.002703039 | 0.027183 | [PABPC1, PPIL1, SNRPG, TRA2A, U2AF1]                                                |

|            |                                                               |     |    |             |          |                                                                         |
|------------|---------------------------------------------------------------|-----|----|-------------|----------|-------------------------------------------------------------------------|
| GO:0008284 | positive regulation of cell proliferation                     | 102 | 5  | 0.00321297  | 0.031862 | [LEF1, PDGFRB, PTK2, SFRP1, SHC1]                                       |
| GO:0007281 | germ cell development                                         | 9   | 2  | 0.003219626 | 0.030857 | [DZIP1, WT1]                                                            |
| GO:0010977 | negative regulation of neuron projection development          | 9   | 2  | 0.003219626 | 0.030857 | [DPYSL3, ITM2C]                                                         |
| GO:0006672 | ceramide metabolic process                                    | 9   | 2  | 0.003219626 | 0.030857 | [PPP2CA, PPP2R1A]                                                       |
| GO:0051493 | regulation of cytoskeleton organization                       | 9   | 2  | 0.003219626 | 0.030857 | [MAPK3, PTK2]                                                           |
| GO:0018108 | peptidyl-tyrosine phosphorylation                             | 32  | 3  | 0.003630669 | 0.033666 | [EPHA4, PDGFRB, PTK2]                                                   |
| GO:0055114 | oxidation-reduction process                                   | 65  | 4  | 0.003685466 | 0.033736 | [LOXL1, PGD, PLOD1, SNCA]                                               |
| GO:0006461 | protein complex assembly                                      | 33  | 3  | 0.003965333 | 0.035839 | [HMGA1, MKI67IP, PPP2R1A]                                               |
| GO:0071158 | positive regulation of cell cycle arrest                      | 10  | 2  | 0.003998816 | 0.035249 | [GATA6, ID2]                                                            |
| GO:0043407 | negative regulation of MAP kinase activity                    | 10  | 2  | 0.003998816 | 0.035249 | [BMP4, HYAL2]                                                           |
| GO:0030010 | establishment of cell polarity                                | 10  | 2  | 0.003998816 | 0.035249 | [PRKCZ, PTK2]                                                           |
| GO:0008360 | regulation of cell shape                                      | 67  | 4  | 0.004109789 | 0.035354 | [CDC42EP4, FMNL3, GAS2, PTK2]                                           |
| GO:0070936 | protein K48-linked ubiquitination                             | 34  | 3  | 0.004318159 | 0.036704 | [MARCH6, UBE2C, UBE2R2]                                                 |
| GO:0006915 | apoptotic process                                             | 321 | 9  | 0.004372371 | 0.036728 | [CCAR1, CLPTM1L, FAM82A2, MAGI3, MAPK3, NISCH, PNMA1, PPP2R2B, RALB]    |
| GO:0060548 | negative regulation of cell death                             | 11  | 2  | 0.004856237 | 0.040085 | [BMP4, SOX4]                                                            |
| GO:0030177 | positive regulation of Wnt receptor signaling pathway         | 11  | 2  | 0.004856237 | 0.040085 | [SFRP1, SULF2]                                                          |
| GO:0009615 | response to virus                                             | 114 | 5  | 0.005155864 | 0.041833 | [BECN1, CLU, HMGA1, HYAL2, TBK1]                                        |
| GO:0006470 | protein dephosphorylation                                     | 37  | 3  | 0.005488364 | 0.044403 | [PPM1M, PPP2CA, PPP2R1A]                                                |
| GO:0006810 | transport                                                     | 395 | 10 | 0.005560954 | 0.044117 | [APOO, CYBA, DCTN1, FADS1, FEZ1, HERC1, MTCH1, PLTP, SLC25A43, SLC37A4] |
| GO:0043392 | negative regulation of DNA binding                            | 12  | 2  | 0.005790307 | 0.044938 | [HABP4, LEF1]                                                           |
| GO:0010033 | response to organic substance                                 | 12  | 2  | 0.005790307 | 0.044938 | [PPP2CA, PPP2R1A]                                                       |
| GO:0000245 | spliceosome assembly                                          | 12  | 2  | 0.005790307 | 0.044938 | [DDX1, SNRPG]                                                           |
| GO:0042493 | response to drug                                              | 38  | 3  | 0.005916522 | 0.044494 | [GATA6, SFRP1, THBS1]                                                   |
| GO:0006730 | one-carbon metabolic process                                  | 13  | 2  | 0.006799469 | 0.050309 | [AHCY, MTHFD1L]                                                         |
| GO:0006446 | regulation of translational initiation                        | 13  | 2  | 0.006799469 | 0.050309 | [DDX1, EIF1B]                                                           |
| GO:0043552 | positive regulation of phosphatidylinositol 3-kinase activity | 13  | 2  | 0.006799469 | 0.050309 | [PDGFRB, PTK2]                                                          |
| GO:0071347 | cellular response to interleukin-1                            | 13  | 2  | 0.006799469 | 0.050309 | [HYAL2, SFRP1]                                                          |
| GO:0043406 | positive regulation of MAP kinase activity                    | 14  | 2  | 0.007882189 | 0.056562 | [CD24, PDGFRB]                                                          |
| GO:0001658 | branching involved in ureteric bud morphogenesis              | 14  | 2  | 0.007882189 | 0.056562 | [BMP4, WT1]                                                             |
| GO:0051260 | protein homooligomerization                                   | 43  | 3  | 0.008353025 | 0.05905  | [ATL1, DPYSL3, SCUBE3]                                                  |
| GO:0007051 | spindle organization                                          | 15  | 2  | 0.009036953 | 0.062342 | [CHD3, UBE2C]                                                           |

|            |                                                                                                     |    |   |             |                         |
|------------|-----------------------------------------------------------------------------------------------------|----|---|-------------|-------------------------|
| GO:0060326 | cell chemotaxis                                                                                     | 15 | 2 | 0.009036953 | 0.062342 [LEF1, PDGFRB] |
| GO:0043981 | histone H4-K5 acetylation                                                                           | 15 | 2 | 0.009036953 | 0.062342 [HCFC1, MEAF6] |
| GO:0043982 | histone H4-K8 acetylation                                                                           | 15 | 2 | 0.009036953 | 0.062342 [HCFC1, MEAF6] |
| GO:2000007 | negative regulation of metanephric comma-shaped body morphogenesis                                  | 1  | 1 | 0.00968352  | 0.043213 [BMP4]         |
| GO:2000005 | negative regulation of metanephric S-shaped body morphogenesis                                      | 1  | 1 | 0.00968352  | 0.043213 [BMP4]         |
| GO:0035441 | cell migration involved in vasculogenesis                                                           | 1  | 1 | 0.00968352  | 0.043213 [PDGFRB]       |
| GO:0051164 | L-xylitol metabolic process                                                                         | 1  | 1 | 0.00968352  | 0.043213 [SORD]         |
| GO:0090194 | negative regulation of glomerulus development                                                       | 1  | 1 | 0.00968352  | 0.043213 [BMP4]         |
| GO:0018277 | protein deamination                                                                                 | 1  | 1 | 0.00968352  | 0.043213 [LOXL1]        |
| GO:0072101 | specification of ureteric bud anterior/posterior symmetry by BMP signaling pathway                  | 1  | 1 | 0.00968352  | 0.043213 [BMP4]         |
| GO:0072104 | glomerular capillary formation                                                                      | 1  | 1 | 0.00968352  | 0.043213 [BMP4]         |
| GO:0048669 | collateral sprouting in absence of injury                                                           | 1  | 1 | 0.00968352  | 0.043213 [APP]          |
| GO:0030223 | neutrophil differentiation                                                                          | 1  | 1 | 0.00968352  | 0.043213 [LEF1]         |
| GO:0045063 | T-helper 1 cell differentiation                                                                     | 1  | 1 | 0.00968352  | 0.043213 [LEF1]         |
| GO:0008090 | retrograde axon cargo transport                                                                     | 1  | 1 | 0.00968352  | 0.043213 [NEFL]         |
| GO:2000054 | negative regulation of Wnt receptor signaling pathway involved in dorsal/ventral axis specification | 1  | 1 | 0.00968352  | 0.043213 [SFRP1]        |
| GO:2000052 | positive regulation of non-canonical Wnt receptor signaling pathway                                 | 1  | 1 | 0.00968352  | 0.043213 [SFRP1]        |
| GO:0048745 | smooth muscle tissue development                                                                    | 1  | 1 | 0.00968352  | 0.043213 [BMP4]         |
| GO:2000195 | negative regulation of female gonad development                                                     | 1  | 1 | 0.00968352  | 0.043213 [WT1]          |
| GO:0072200 | negative regulation of mesenchymal cell proliferation involved in ureter development                | 1  | 1 | 0.00968352  | 0.043213 [BMP4]         |
| GO:2000178 | negative regulation of neural precursor cell proliferation                                          | 1  | 1 | 0.00968352  | 0.043213 [ID2]          |
| GO:0010807 | regulation of synaptic vesicle priming                                                              | 1  | 1 | 0.00968352  | 0.043213 [STXBP1]       |
| GO:0055015 | ventricular cardiac muscle cell development                                                         | 1  | 1 | 0.00968352  | 0.043213 [HEY2]         |
| GO:0050774 | negative regulation of dendrite morphogenesis                                                       | 1  | 1 | 0.00968352  | 0.043213 [YWHAH]        |
| GO:0008088 | axon cargo transport                                                                                | 1  | 1 | 0.00968352  | 0.043213 [APP]          |
| GO:0045603 | positive regulation of endothelial cell differentiation                                             | 1  | 1 | 0.00968352  | 0.043213 [BTG1]         |
| GO:2000270 | negative regulation of fibroblast apoptosis                                                         | 1  | 1 | 0.00968352  | 0.043213 [SFRP1]        |

|            |                                                                                                                              |   |   |            |                  |
|------------|------------------------------------------------------------------------------------------------------------------------------|---|---|------------|------------------|
| GO:2000271 | positive regulation of fibroblast apoptosis                                                                                  | 1 | 1 | 0.00968352 | 0.043213 [SFRP1] |
| GO:0070495 | negative regulation of thrombin receptor signaling pathway                                                                   | 1 | 1 | 0.00968352 | 0.043213 [SNCA]  |
| GO:0006713 | glucocorticoid catabolic process                                                                                             | 1 | 1 | 0.00968352 | 0.043213 [YWHAH] |
| GO:0042551 | neuron maturation                                                                                                            | 1 | 1 | 0.00968352 | 0.043213 [CLN5]  |
| GO:0003208 | cardiac ventricle morphogenesis                                                                                              | 1 | 1 | 0.00968352 | 0.043213 [HEY2]  |
| GO:0010626 | negative regulation of Schwann cell proliferation                                                                            | 1 | 1 | 0.00968352 | 0.043213 [RNF10] |
| GO:0048710 | regulation of astrocyte differentiation                                                                                      | 1 | 1 | 0.00968352 | 0.043213 [EPHA4] |
| GO:0071305 | cellular response to vitamin D                                                                                               | 1 | 1 | 0.00968352 | 0.043213 [SFRP1] |
| GO:0072302 | negative regulation of metanephric glomerular mesangial cell proliferation                                                   | 1 | 1 | 0.00968352 | 0.043213 [WT1]   |
| GO:0061149 | BMP signaling pathway involved in ureter morphogenesis                                                                       | 1 | 1 | 0.00968352 | 0.043213 [BMP4]  |
| GO:0019066 | translocation of virus into host cell                                                                                        | 1 | 1 | 0.00968352 | 0.043213 [HYAL2] |
| GO:0072192 | ureter epithelial cell differentiation                                                                                       | 1 | 1 | 0.00968352 | 0.043213 [BMP4]  |
| GO:2000080 | negative regulation of canonical Wnt receptor signaling pathway involved in controlling type B pancreatic cell proliferation | 1 | 1 | 0.00968352 | 0.043213 [SFRP1] |
| GO:0072193 | ureter smooth muscle cell differentiation                                                                                    | 1 | 1 | 0.00968352 | 0.043213 [BMP4]  |
| GO:0061155 | pulmonary artery endothelial tube morphogenesis                                                                              | 1 | 1 | 0.00968352 | 0.043213 [BMP4]  |
| GO:0061151 | BMP signaling pathway involved in renal system segmentation                                                                  | 1 | 1 | 0.00968352 | 0.043213 [BMP4]  |
| GO:0006543 | glutamine catabolic process                                                                                                  | 1 | 1 | 0.00968352 | 0.043213 [GLS]   |
| GO:0046456 | icosanoid biosynthetic process                                                                                               | 1 | 1 | 0.00968352 | 0.043213 [FADS1] |
| GO:0019087 | transformation of host cell by virus                                                                                         | 1 | 1 | 0.00968352 | 0.043213 [HYAL2] |
| GO:0006062 | sorbitol catabolic process                                                                                                   | 1 | 1 | 0.00968352 | 0.043213 [SORD]  |
| GO:0009051 | pentose-phosphate shunt, oxidative branch                                                                                    | 1 | 1 | 0.00968352 | 0.043213 [PGD]   |
| GO:0046851 | negative regulation of bone remodeling                                                                                       | 1 | 1 | 0.00968352 | 0.043213 [SFRP1] |
| GO:0061032 | visceral serous pericardium development                                                                                      | 1 | 1 | 0.00968352 | 0.043213 [WT1]   |
| GO:0061031 | endodermal digestive tract morphogenesis                                                                                     | 1 | 1 | 0.00968352 | 0.043213 [ID2]   |
| GO:0014070 | response to organic cyclic compound                                                                                          | 1 | 1 | 0.00968352 | 0.043213 [SFRP1] |
| GO:0006491 | N-glycan processing                                                                                                          | 1 | 1 | 0.00968352 | 0.043213 [FUT8]  |
| GO:0032600 | chemokine receptor transport out of membrane raft                                                                            | 1 | 1 | 0.00968352 | 0.043213 [CD24]  |

|            |                                                                                                      |   |   |            |                    |
|------------|------------------------------------------------------------------------------------------------------|---|---|------------|--------------------|
| GO:0061047 | positive regulation of branching involved in lung morphogenesis                                      | 1 | 1 | 0.00968352 | 0.043213 [BMP4]    |
| GO:0007176 | regulation of epidermal growth factor-activated receptor activity                                    | 1 | 1 | 0.00968352 | 0.043213 [APP]     |
| GO:0032606 | type I interferon production                                                                         | 1 | 1 | 0.00968352 | 0.043213 [TBK1]    |
| GO:0046947 | hydroxylysine biosynthetic process                                                                   | 1 | 1 | 0.00968352 | 0.043213 [PLOD1]   |
| GO:0033693 | neurofilament bundle assembly                                                                        | 1 | 1 | 0.00968352 | 0.043213 [NEFL]    |
| GO:0016072 | rRNA metabolic process                                                                               | 1 | 1 | 0.00968352 | 0.043213 [MKI67IP] |
| GO:0022601 | menstrual cycle phase                                                                                | 1 | 1 | 0.00968352 | 0.043213 [SFRP1]   |
| GO:0021957 | corticospinal tract morphogenesis                                                                    | 1 | 1 | 0.00968352 | 0.043213 [EPHA4]   |
| GO:0072262 | metanephric glomerular mesangial cell proliferation involved in metanephros development              | 1 | 1 | 0.00968352 | 0.043213 [PDGFRB]  |
| GO:0043567 | regulation of insulin-like growth factor receptor signaling pathway                                  | 1 | 1 | 0.00968352 | 0.043213 [IGFBP2]  |
| GO:0071773 | cellular response to BMP stimulus                                                                    | 1 | 1 | 0.00968352 | 0.043213 [SFRP1]   |
| GO:0032597 | B cell receptor transport into membrane raft                                                         | 1 | 1 | 0.00968352 | 0.043213 [CD24]    |
| GO:0048392 | intermediate mesodermal cell differentiation                                                         | 1 | 1 | 0.00968352 | 0.043213 [BMP4]    |
| GO:2000623 | negative regulation of nuclear-transcribed mRNA catabolic process, nonsense-mediated decay           | 1 | 1 | 0.00968352 | 0.043213 [PABPC1]  |
| GO:0060732 | positive regulation of inositol phosphate biosynthetic process                                       | 1 | 1 | 0.00968352 | 0.043213 [SNCA]    |
| GO:0071380 | cellular response to prostaglandin E stimulus                                                        | 1 | 1 | 0.00968352 | 0.043213 [SFRP1]   |
| GO:0051901 | positive regulation of mitochondrial depolarization                                                  | 1 | 1 | 0.00968352 | 0.043213 [MLLT11]  |
| GO:0021522 | spinal cord motor neuron differentiation                                                             | 1 | 1 | 0.00968352 | 0.043213 [SOX4]    |
| GO:0031056 | regulation of histone modification                                                                   | 1 | 1 | 0.00968352 | 0.043213 [CDK9]    |
| GO:0046370 | fructose biosynthetic process                                                                        | 1 | 1 | 0.00968352 | 0.043213 [SORD]    |
| GO:0051583 | dopamine uptake                                                                                      | 1 | 1 | 0.00968352 | 0.043213 [SNCA]    |
| GO:0051585 | negative regulation of dopamine uptake                                                               | 1 | 1 | 0.00968352 | 0.043213 [SNCA]    |
| GO:0032026 | response to magnesium ion                                                                            | 1 | 1 | 0.00968352 | 0.043213 [SNCA]    |
| GO:0007617 | mating behavior                                                                                      | 1 | 1 | 0.00968352 | 0.043213 [APP]     |
| GO:2001108 | positive regulation of Rho guanyl-nucleotide exchange factor activity                                | 1 | 1 | 0.00968352 | 0.043213 [EPHA4]   |
| GO:0072097 | negative regulation of branch elongation involved in ureteric bud branching by BMP signaling pathway | 1 | 1 | 0.00968352 | 0.043213 [BMP4]    |

|            |                                                                    |   |   |            |                   |
|------------|--------------------------------------------------------------------|---|---|------------|-------------------|
| GO:0032229 | negative regulation of synaptic transmission, GABAergic            | 1 | 1 | 0.00968352 | 0.043213 [STXBP1] |
| GO:0060178 | regulation of exocyst localization                                 | 1 | 1 | 0.00968352 | 0.043213 [RALB]   |
| GO:0032367 | intracellular cholesterol transport                                | 1 | 1 | 0.00968352 | 0.043213 [VPS4B]  |
| GO:0033993 | response to lipid                                                  | 1 | 1 | 0.00968352 | 0.043213 [VPS4B]  |
| GO:0060160 | negative regulation of dopamine receptor signaling pathway         | 1 | 1 | 0.00968352 | 0.043213 [PALM]   |
| GO:0060981 | cell migration involved in coronary angiogenesis                   | 1 | 1 | 0.00968352 | 0.043213 [PDGFRB] |
| GO:0043111 | replication fork arrest                                            | 1 | 1 | 0.00968352 | 0.043213 [CDK9]   |
| GO:2000553 | positive regulation of T-helper 2 cell cytokine production         | 1 | 1 | 0.00968352 | 0.043213 [PRKCZ]  |
| GO:0051160 | L-xylitol catabolic process                                        | 1 | 1 | 0.00968352 | 0.043213 [SORD]   |
| GO:0035791 | platelet-derived growth factor receptor-beta signaling pathway     | 1 | 1 | 0.00968352 | 0.043213 [PDGFRB] |
| GO:0071864 | positive regulation of cell proliferation in bone marrow           | 1 | 1 | 0.00968352 | 0.043213 [LEF1]   |
| GO:0071866 | negative regulation of apoptotic process in bone marrow            | 1 | 1 | 0.00968352 | 0.043213 [LEF1]   |
| GO:2000463 | positive regulation of excitatory postsynaptic membrane potential  | 1 | 1 | 0.00968352 | 0.043213 [PRKCZ]  |
| GO:0010517 | regulation of phospholipase activity                               | 1 | 1 | 0.00968352 | 0.043213 [SNCA]   |
| GO:0071872 | cellular response to epinephrine stimulus                          | 1 | 1 | 0.00968352 | 0.043213 [SNCA]   |
| GO:0051612 | negative regulation of serotonin uptake                            | 1 | 1 | 0.00968352 | 0.043213 [SNCA]   |
| GO:0031639 | plasminogen activation                                             | 1 | 1 | 0.00968352 | 0.043213 [PLAT]   |
| GO:2000761 | positive regulation of N-terminal peptidyl-lysine acetylation      | 1 | 1 | 0.00968352 | 0.043213 [SOX4]   |
| GO:0051622 | negative regulation of norepinephrine uptake                       | 1 | 1 | 0.00968352 | 0.043213 [SNCA]   |
| GO:0044154 | histone H3-K14 acetylation                                         | 1 | 1 | 0.00968352 | 0.043213 [MEAF6]  |
| GO:0060947 | cardiac vascular smooth muscle cell differentiation                | 1 | 1 | 0.00968352 | 0.043213 [GATA6]  |
| GO:0032911 | negative regulation of transforming growth factor beta1 production | 1 | 1 | 0.00968352 | 0.043213 [GATA6]  |
| GO:0032912 | negative regulation of transforming growth factor beta2 production | 1 | 1 | 0.00968352 | 0.043213 [GATA6]  |
| GO:0032913 | negative regulation of transforming growth factor beta3 production | 1 | 1 | 0.00968352 | 0.043213 [CD24]   |

|            |                                                                 |     |   |             |                                      |
|------------|-----------------------------------------------------------------|-----|---|-------------|--------------------------------------|
| GO:0001959 | regulation of cytokine-mediated signaling pathway               | 1   | 1 | 0.00968352  | 0.043213 [CD24]                      |
| GO:2001181 | positive regulation of interleukin-10 secretion                 | 1   | 1 | 0.00968352  | 0.043213 [PRKCZ]                     |
| GO:0001928 | regulation of exocyst assembly                                  | 1   | 1 | 0.00968352  | 0.043213 [RALB]                      |
| GO:0010594 | regulation of endothelial cell migration                        | 1   | 1 | 0.00968352  | 0.043213 [PTK2]                      |
| GO:0038007 | netrin-activated signaling pathway                              | 1   | 1 | 0.00968352  | 0.043213 [PTK2]                      |
| GO:0051764 | actin crosslink formation                                       | 1   | 1 | 0.00968352  | 0.043213 [DPYSL3]                    |
| GO:0060218 | hemopoietic stem cell differentiation                           | 1   | 1 | 0.00968352  | 0.043213 [SFRP1]                     |
| GO:0071893 | BMP signaling pathway involved in nephric duct formation        | 1   | 1 | 0.00968352  | 0.043213 [BMP4]                      |
| GO:0043627 | response to estrogen stimulus                                   | 16  | 2 | 0.010262271 | 0.034001 [CD24, GSTM3]               |
| GO:0031623 | receptor internalization                                        | 16  | 2 | 0.010262271 | 0.034001 [ADRBK1, SNCA]              |
| GO:0071356 | cellular response to tumor necrosis factor                      | 17  | 2 | 0.011556676 | 0.037851 [HYAL2, SFRP1]              |
| GO:0030178 | negative regulation of wnt receptor signaling pathway           | 17  | 2 | 0.011556676 | 0.037851 [APCDD1, SFRP1]             |
| GO:0001649 | osteoblast differentiation                                      | 17  | 2 | 0.011556676 | 0.037851 [LEF1, SFRP1]               |
| GO:0001822 | kidney development                                              | 18  | 2 | 0.012918721 | 0.041737 [BMP4, WT1]                 |
| GO:0030155 | regulation of cell adhesion                                     | 18  | 2 | 0.012918721 | 0.041737 [PPP2CA, PPP2R1A]           |
| GO:0007409 | axonogenesis                                                    | 18  | 2 | 0.012918721 | 0.041737 [APP, ATL1]                 |
| GO:0016197 | endosome transport                                              | 19  | 2 | 0.014346981 | 0.045326 [SNX17, VPS4B]              |
| GO:0045727 | positive regulation of translation                              | 19  | 2 | 0.014346981 | 0.045326 [FAM129A, SOX4]             |
| GO:0014068 | positive regulation of phosphatidylinositol 3-kinase cascade    | 19  | 2 | 0.014346981 | 0.045326 [PDGFRB, PTK2]              |
| GO:0090263 | positive regulation of canonical Wnt receptor signaling pathway | 19  | 2 | 0.014346981 | 0.045326 [SFRP1, SOX4]               |
| GO:0042593 | glucose homeostasis                                             | 19  | 2 | 0.014346981 | 0.045326 [SLC37A4, SOX4]             |
| GO:0031214 | biomineral tissue development                                   | 19  | 2 | 0.014346981 | 0.045326 [ENPP1, IBSP]               |
| GO:0043984 | histone H4-K16 acetylation                                      | 19  | 2 | 0.014346981 | 0.045326 [HCFC1, MEAF6]              |
| GO:0051897 | positive regulation of protein kinase B signaling cascade       | 20  | 2 | 0.015840052 | 0.049173 [PTK2, THBS1]               |
| GO:0071456 | cellular response to hypoxia                                    | 21  | 2 | 0.017396552 | 0.053424 [GATA6, SFRP1]              |
| GO:0006006 | glucose metabolic process                                       | 21  | 2 | 0.017396552 | 0.053424 [SLC37A4, SORD]             |
| GO:0031532 | actin cytoskeleton reorganization                               | 21  | 2 | 0.017396552 | 0.053424 [ANTXR1, CDC42BPA]          |
| GO:0001934 | positive regulation of protein phosphorylation                  | 21  | 2 | 0.017396552 | 0.053424 [FAM129A, PTK2]             |
| GO:0045087 | innate immune response                                          | 103 | 4 | 0.018096469 | 0.054982 [CD55, CLU, SERPING1, TBK1] |
| GO:0070534 | protein K63-linked ubiquitination                               | 22  | 2 | 0.019015117 | 0.057407 [UBE2S, WWP2]               |



|            |                                                                         |    |   |             |                       |
|------------|-------------------------------------------------------------------------|----|---|-------------|-----------------------|
| GO:0008584 | male gonad development                                                  | 22 | 2 | 0.019015117 | 0.057407 [GATA6, WT1] |
| GO:0010739 | positive regulation of protein kinase A signaling cascade               | 2  | 1 | 0.019273488 | 0.049235 [AKAP12]     |
| GO:0008054 | cyclin catabolic process                                                | 2  | 1 | 0.019273488 | 0.049235 [UBE2C]      |
| GO:0090191 | negative regulation of branching involved in ureteric bud morphogenesis | 2  | 1 | 0.019273488 | 0.049235 [BMP4]       |
| GO:0033598 | mammary gland epithelial cell proliferation                             | 2  | 1 | 0.019273488 | 0.049235 [ID2]        |
| GO:0045161 | neuronal ion channel clustering                                         | 2  | 1 | 0.019273488 | 0.049235 [MTCH1]      |
| GO:0014846 | esophagus smooth muscle contraction                                     | 2  | 1 | 0.019273488 | 0.049235 [SULF2]      |
| GO:0014009 | glial cell proliferation                                                | 2  | 1 | 0.019273488 | 0.049235 [SOX4]       |
| GO:0010216 | maintenance of DNA methylation                                          | 2  | 1 | 0.019273488 | 0.049235 [DNMT1]      |
| GO:0072125 | negative regulation of glomerular mesangial cell proliferation          | 2  | 1 | 0.019273488 | 0.049235 [BMP4]       |
| GO:0035694 | mitochondrial protein catabolic process                                 | 2  | 1 | 0.019273488 | 0.049235 [BNIP3L]     |
| GO:0016188 | synaptic vesicle maturation                                             | 2  | 1 | 0.019273488 | 0.049235 [STXBP1]     |
| GO:0015891 | siderophore transport                                                   | 2  | 1 | 0.019273488 | 0.049235 [SLC22A17]   |
| GO:0008089 | anterograde axon cargo transport                                        | 2  | 1 | 0.019273488 | 0.049235 [NEFL]       |
| GO:0002437 | inflammatory response to antigenic stimulus                             | 2  | 1 | 0.019273488 | 0.049235 [PNMA1]      |
| GO:0070295 | renal water absorption                                                  | 2  | 1 | 0.019273488 | 0.049235 [HYAL2]      |
| GO:0045777 | positive regulation of blood pressure                                   | 2  | 1 | 0.019273488 | 0.049235 [ID2]        |
| GO:0030856 | regulation of epithelial cell differentiation                           | 2  | 1 | 0.019273488 | 0.049235 [CD24]       |
| GO:0030854 | positive regulation of granulocyte differentiation                      | 2  | 1 | 0.019273488 | 0.049235 [LEF1]       |
| GO:0045630 | positive regulation of T-helper 2 cell differentiation                  | 2  | 1 | 0.019273488 | 0.049235 [PRKCZ]      |
| GO:0046628 | positive regulation of insulin receptor signaling pathway               | 2  | 1 | 0.019273488 | 0.049235 [PRKCZ]      |
| GO:0019046 | reactivation of latent virus                                            | 2  | 1 | 0.019273488 | 0.049235 [HCFC1]      |
| GO:2000065 | negative regulation of cortisol biosynthetic process                    | 2  | 1 | 0.019273488 | 0.049235 [DKK3]       |
| GO:0006097 | glyoxylate cycle                                                        | 2  | 1 | 0.019273488 | 0.049235 [IDH1]       |
| GO:0051967 | negative regulation of synaptic transmission, glutamatergic             | 2  | 1 | 0.019273488 | 0.049235 [ATAD1]      |
| GO:0006282 | regulation of DNA repair                                                | 2  | 1 | 0.019273488 | 0.049235 [CDK9]       |
| GO:0097156 | fasciculation of motor neuron axon                                      | 2  | 1 | 0.019273488 | 0.049235 [EPHA4]      |
| GO:0097155 | fasciculation of sensory neuron axon                                    | 2  | 1 | 0.019273488 | 0.049235 [EPHA4]      |

|            |                                                                                |   |   |             |                   |
|------------|--------------------------------------------------------------------------------|---|---|-------------|-------------------|
| GO:0032510 | endosome to lysosome transport via multivesicular body sorting pathway         | 2 | 1 | 0.019273488 | 0.049235 [VPS4B]  |
| GO:0032696 | negative regulation of interleukin-13 production                               | 2 | 1 | 0.019273488 | 0.049235 [LEF1]   |
| GO:0040037 | negative regulation of fibroblast growth factor receptor signaling pathway     | 2 | 1 | 0.019273488 | 0.049235 [SULF2]  |
| GO:0032516 | positive regulation of phosphoprotein phosphatase activity                     | 2 | 1 | 0.019273488 | 0.049235 [PDGFRB] |
| GO:0061030 | epithelial cell differentiation involved in mammary gland alveolus development | 2 | 1 | 0.019273488 | 0.049235 [ID2]    |
| GO:0033689 | negative regulation of osteoblast proliferation                                | 2 | 1 | 0.019273488 | 0.049235 [SFRP1]  |
| GO:0010040 | response to iron(II) ion                                                       | 2 | 1 | 0.019273488 | 0.049235 [SNCA]   |
| GO:0019896 | axon transport of mitochondrion                                                | 2 | 1 | 0.019273488 | 0.049235 [NEFL]   |
| GO:0009950 | dorsal/ventral axis specification                                              | 2 | 1 | 0.019273488 | 0.049235 [SFRP1]  |
| GO:0014911 | positive regulation of smooth muscle cell migration                            | 2 | 1 | 0.019273488 | 0.049235 [PDGFRB] |
| GO:0046826 | negative regulation of protein export from nucleus                             | 2 | 1 | 0.019273488 | 0.049235 [SOX4]   |
| GO:0006027 | glycosaminoglycan catabolic process                                            | 2 | 1 | 0.019273488 | 0.049235 [HYAL2]  |
| GO:0003156 | regulation of organ formation                                                  | 2 | 1 | 0.019273488 | 0.049235 [WT1]    |
| GO:0072166 | posterior mesonephric tubule development                                       | 2 | 1 | 0.019273488 | 0.049235 [WT1]    |
| GO:0035990 | tendon cell differentiation                                                    | 2 | 1 | 0.019273488 | 0.049235 [BMP4]   |
| GO:0071392 | cellular response to estradiol stimulus                                        | 2 | 1 | 0.019273488 | 0.049235 [SFRP1]  |
| GO:0035993 | deltoid tuberosity development                                                 | 2 | 1 | 0.019273488 | 0.049235 [BMP4]   |
| GO:0070537 | histone H2A K63-linked deubiquitination                                        | 2 | 1 | 0.019273488 | 0.049235 [UIMC1]  |
| GO:0035802 | adrenal cortex formation                                                       | 2 | 1 | 0.019273488 | 0.049235 [WT1]    |
| GO:0032317 | regulation of Rap GTPase activity                                              | 2 | 1 | 0.019273488 | 0.049235 [EPHA4]  |
| GO:2001243 | negative regulation of intrinsic apoptotic signaling pathway                   | 2 | 1 | 0.019273488 | 0.049235 [SRC]    |
| GO:0090068 | positive regulation of cell cycle process                                      | 2 | 1 | 0.019273488 | 0.049235 [LEF1]   |
| GO:0008344 | adult locomotory behavior                                                      | 2 | 1 | 0.019273488 | 0.049235 [APP]    |
| GO:0006002 | fructose 6-phosphate metabolic process                                         | 2 | 1 | 0.019273488 | 0.049235 [PFKL]   |
| GO:0016557 | peroxisome membrane biogenesis                                                 | 2 | 1 | 0.019273488 | 0.049235 [PEX19]  |
| GO:0060749 | mammary gland alveolus development                                             | 2 | 1 | 0.019273488 | 0.049235 [ID2]    |
| GO:0032714 | negative regulation of interleukin-5 production                                | 2 | 1 | 0.019273488 | 0.049235 [LEF1]   |
| GO:0032713 | negative regulation of interleukin-4 production                                | 2 | 1 | 0.019273488 | 0.049235 [LEF1]   |

|            |                                                                   |     |   |             |                                         |
|------------|-------------------------------------------------------------------|-----|---|-------------|-----------------------------------------|
| GO:0035860 | glial cell-derived neurotrophic factor receptor signaling pathway | 2   | 1 | 0.019273488 | 0.049235 [SULF2]                        |
| GO:0001841 | neural tube formation                                             | 2   | 1 | 0.019273488 | 0.049235 [SOX4]                         |
| GO:0060384 | innervation                                                       | 2   | 1 | 0.019273488 | 0.049235 [SULF2]                        |
| GO:0021782 | glial cell development                                            | 2   | 1 | 0.019273488 | 0.049235 [SOX4]                         |
| GO:0090402 | oncogene-induced senescence                                       | 2   | 1 | 0.019273488 | 0.049235 [HMGA1]                        |
| GO:0043408 | regulation of MAPK cascade                                        | 2   | 1 | 0.019273488 | 0.049235 [CD24]                         |
| GO:0043401 | steroid hormone mediated signaling pathway                        | 2   | 1 | 0.019273488 | 0.049235 [BMP4]                         |
| GO:0001869 | negative regulation of complement activation, lectin pathway      | 2   | 1 | 0.019273488 | 0.049235 [SERPING1]                     |
| GO:0051573 | negative regulation of histone H3-K9 methylation                  | 2   | 1 | 0.019273488 | 0.049235 [DNMT1]                        |
| GO:0043254 | regulation of protein complex assembly                            | 2   | 1 | 0.019273488 | 0.049235 [HCFC1]                        |
| GO:0032348 | negative regulation of aldosterone biosynthetic process           | 2   | 1 | 0.019273488 | 0.049235 [DKK3]                         |
| GO:0015760 | glucose-6-phosphate transport                                     | 2   | 1 | 0.019273488 | 0.049235 [SLC37A4]                      |
| GO:0031936 | negative regulation of chromatin silencing                        | 2   | 1 | 0.019273488 | 0.049235 [HMGA1]                        |
| GO:0031536 | positive regulation of exit from mitosis                          | 2   | 1 | 0.019273488 | 0.049235 [UBE2C]                        |
| GO:0051145 | smooth muscle cell differentiation                                | 2   | 1 | 0.019273488 | 0.049235 [GATA6]                        |
| GO:0002576 | platelet degranulation                                            | 2   | 1 | 0.019273488 | 0.049235 [STXBP1]                       |
| GO:0045920 | negative regulation of exocytosis                                 | 2   | 1 | 0.019273488 | 0.049235 [SNCA]                         |
| GO:0007412 | axon target recognition                                           | 2   | 1 | 0.019273488 | 0.049235 [STXBP1]                       |
| GO:0048681 | negative regulation of axon regeneration                          | 2   | 1 | 0.019273488 | 0.049235 [EPHA4]                        |
| GO:2000664 | positive regulation of interleukin-5 secretion                    | 2   | 1 | 0.019273488 | 0.049235 [PRKCZ]                        |
| GO:2000667 | positive regulation of interleukin-13 secretion                   | 2   | 1 | 0.019273488 | 0.049235 [PRKCZ]                        |
| GO:0050803 | regulation of synapse structure and activity                      | 2   | 1 | 0.019273488 | 0.049235 [APP]                          |
| GO:0015991 | ATP hydrolysis coupled proton transport                           | 2   | 1 | 0.019273488 | 0.049235 [ATP6V1H]                      |
| GO:0003357 | noradrenergic neuron differentiation                              | 2   | 1 | 0.019273488 | 0.049235 [SOX4]                         |
| GO:0061298 | retina vasculature development in camera-type eye                 | 2   | 1 | 0.019273488 | 0.049235 [PDGFRB]                       |
| GO:0031643 | positive regulation of myelination                                | 2   | 1 | 0.019273488 | 0.049235 [RNF10]                        |
| GO:0071899 | negative regulation of estrogen receptor binding                  | 2   | 1 | 0.019273488 | 0.049235 [LEF1]                         |
| GO:0051271 | negative regulation of cellular component movement                | 2   | 1 | 0.019273488 | 0.049235 [ACTN1]                        |
| GO:0097084 | vascular smooth muscle cell development                           | 2   | 1 | 0.019273488 | 0.049235 [HEY2]                         |
| GO:0043123 | positive regulation of I-kappaB kinase/NF-kappaB cascade          | 105 | 4 | 0.019276367 | 0.042743 [S100B, SLC20A1, TBK1, TRIM13] |

|            |                                                                      |     |    |             |                                                                                 |
|------------|----------------------------------------------------------------------|-----|----|-------------|---------------------------------------------------------------------------------|
| GO:0046777 | protein autophosphorylation                                          | 107 | 4  | 0.020502762 | 0.045322 [EPHA4, PDGFRB, PTK2, STK16]                                           |
| GO:0051028 | mRNA transport                                                       | 60  | 3  | 0.020539292 | 0.045263 [NUP50, NUP93, XPO7]                                                   |
| GO:0006749 | glutathione metabolic process                                        | 25  | 2  | 0.024229888 | 0.053149 [GGT7, GSTM3]                                                          |
| GO:0048015 | phosphatidylinositol-mediated signaling                              | 25  | 2  | 0.024229888 | 0.053149 [PDGFRB, UBE2C]                                                        |
| GO:0042981 | regulation of apoptotic process                                      | 65  | 3  | 0.02531203  | 0.055268 [ACTN1, BTG1, NAE1]                                                    |
| GO:0070979 | protein K11-linked ubiquitination                                    | 26  | 2  | 0.026083496 | 0.056779 [UBE2C, UBE2S]                                                         |
| GO:0000122 | negative regulation of transcription from RNA polymerase II promoter | 117 | 4  | 0.027346068 | 0.059347 [GATA6, HCFC1, HEY2, PTH]                                              |
| GO:0000184 | nuclear-transcribed mRNA catabolic process, nonsense-mediated decay  | 27  | 2  | 0.027992658 | 0.060474 [PAN3, RNPS1]                                                          |
| GO:0051607 | defense response to virus                                            | 27  | 2  | 0.027992658 | 0.060474 [BNIP3L, SAMHD1]                                                       |
| GO:0006508 | proteolysis                                                          | 476 | 10 | 0.028111622 | 0.060457 [ADAMTS7, CASP3, CPE, CTSC, PIGK, PLAT, SEC11A, SERPING1, UCHL1, USP7] |
| GO:0006457 | protein folding                                                      | 68  | 3  | 0.028436989 | 0.060973 [PFDN4, PPIL1, PPIL4]                                                  |
| GO:0033314 | mitotic cell cycle DNA replication checkpoint                        | 3   | 1  | 0.028770805 | 0.057542 [NAE1]                                                                 |
| GO:0030201 | heparan sulfate proteoglycan metabolic process                       | 3   | 1  | 0.028770805 | 0.057542 [SULF2]                                                                |
| GO:0006636 | unsaturated fatty acid biosynthetic process                          | 3   | 1  | 0.028770805 | 0.057542 [FADS1]                                                                |
| GO:0030422 | production of siRNA involved in RNA interference                     | 3   | 1  | 0.028770805 | 0.057542 [PRKRA]                                                                |
| GO:0007194 | negative regulation of adenylate cyclase activity                    | 3   | 1  | 0.028770805 | 0.057542 [PALM]                                                                 |
| GO:2000117 | negative regulation of cysteine-type endopeptidase activity          | 3   | 1  | 0.028770805 | 0.057542 [SFRP1]                                                                |
| GO:0048663 | neuron fate commitment                                               | 3   | 1  | 0.028770805 | 0.057542 [ID2]                                                                  |
| GO:0009888 | tissue development                                                   | 3   | 1  | 0.028770805 | 0.057542 [WT1]                                                                  |
| GO:0055003 | cardiac myofibril assembly                                           | 3   | 1  | 0.028770805 | 0.057542 [PDGFRB]                                                               |
| GO:0002768 | immune response-regulating cell surface receptor signaling pathway   | 3   | 1  | 0.028770805 | 0.057542 [CD24]                                                                 |
| GO:0008634 | negative regulation of survival gene product expression              | 3   | 1  | 0.028770805 | 0.057542 [BNIP3L]                                                               |
| GO:0003211 | cardiac ventricle formation                                          | 3   | 1  | 0.028770805 | 0.057542 [SOX4]                                                                 |
| GO:0032508 | DNA duplex unwinding                                                 | 3   | 1  | 0.028770805 | 0.057542 [DDX1]                                                                 |
| GO:0042416 | dopamine biosynthetic process                                        | 3   | 1  | 0.028770805 | 0.057542 [SNCA]                                                                 |
| GO:0006268 | DNA unwinding involved in replication                                | 3   | 1  | 0.028770805 | 0.057542 [HMGA1]                                                                |
| GO:0009395 | phospholipid catabolic process                                       | 3   | 1  | 0.028770805 | 0.057542 [PRDX6]                                                                |
| GO:0030539 | male genitalia development                                           | 3   | 1  | 0.028770805 | 0.057542 [WT1]                                                                  |

|            |                                                                                                                                 |   |   |             |                    |
|------------|---------------------------------------------------------------------------------------------------------------------------------|---|---|-------------|--------------------|
| GO:0072277 | metanephric glomerular capillary formation                                                                                      | 3 | 1 | 0.028770805 | 0.057542 [PDGFRB]  |
| GO:0007035 | vacuolar acidification                                                                                                          | 3 | 1 | 0.028770805 | 0.057542 [ATP6V1H] |
| GO:0072284 | metanephric S-shaped body morphogenesis                                                                                         | 3 | 1 | 0.028770805 | 0.057542 [WT1]     |
| GO:0045578 | negative regulation of B cell differentiation                                                                                   | 3 | 1 | 0.028770805 | 0.057542 [SFRP1]   |
| GO:0014059 | regulation of dopamine secretion                                                                                                | 3 | 1 | 0.028770805 | 0.057542 [SNCA]    |
| GO:0061077 | chaperone-mediated protein folding                                                                                              | 3 | 1 | 0.028770805 | 0.057542 [CLU]     |
| GO:0006467 | protein thiol-disulfide exchange                                                                                                | 3 | 1 | 0.028770805 | 0.057542 [PIGK]    |
| GO:0035986 | senescence-associated heterochromatin focus assembly                                                                            | 3 | 1 | 0.028770805 | 0.057542 [HMGA1]   |
| GO:0006337 | nucleosome disassembly                                                                                                          | 3 | 1 | 0.028770805 | 0.057542 [HMGA1]   |
| GO:0061099 | negative regulation of protein tyrosine kinase activity                                                                         | 3 | 1 | 0.028770805 | 0.057542 [HYAL2]   |
| GO:0006102 | isocitrate metabolic process                                                                                                    | 3 | 1 | 0.028770805 | 0.057542 [IDH1]    |
| GO:0071371 | cellular response to gonadotropin stimulus                                                                                      | 3 | 1 | 0.028770805 | 0.057542 [WT1]     |
| GO:0040014 | regulation of multicellular organism growth                                                                                     | 3 | 1 | 0.028770805 | 0.057542 [APP]     |
| GO:0070779 | D-aspartate import                                                                                                              | 3 | 1 | 0.028770805 | 0.057542 [SLC1A1]  |
| GO:0007611 | learning or memory                                                                                                              | 3 | 1 | 0.028770805 | 0.057542 [S100B]   |
| GO:0071353 | cellular response to interleukin-4                                                                                              | 3 | 1 | 0.028770805 | 0.057542 [LEF1]    |
| GO:0042167 | heme catabolic process                                                                                                          | 3 | 1 | 0.028770805 | 0.057542 [AMBP]    |
| GO:0051938 | L-glutamate import                                                                                                              | 3 | 1 | 0.028770805 | 0.057542 [SLC1A1]  |
| GO:0060766 | negative regulation of androgen receptor signaling pathway                                                                      | 3 | 1 | 0.028770805 | 0.057542 [SFRP1]   |
| GO:0048488 | synaptic vesicle endocytosis                                                                                                    | 3 | 1 | 0.028770805 | 0.057542 [SNCA]    |
| GO:0060174 | limb bud formation                                                                                                              | 3 | 1 | 0.028770805 | 0.057542 [SOX4]    |
| GO:0002237 | response to molecule of bacterial origin                                                                                        | 3 | 1 | 0.028770805 | 0.057542 [CD24]    |
| GO:0060563 | neuroepithelial cell differentiation                                                                                            | 3 | 1 | 0.028770805 | 0.057542 [SOX4]    |
| GO:0050732 | negative regulation of peptidyl-tyrosine phosphorylation                                                                        | 3 | 1 | 0.028770805 | 0.057542 [SFRP1]   |
| GO:0002063 | chondrocyte development                                                                                                         | 3 | 1 | 0.028770805 | 0.057542 [SULF2]   |
| GO:0035793 | positive regulation of metanephric mesenchymal cell migration by platelet-derived growth factor receptor-beta signaling pathway | 3 | 1 | 0.028770805 | 0.057542 [PDGFRB]  |
| GO:0001775 | cell activation                                                                                                                 | 3 | 1 | 0.028770805 | 0.057542 [CD24]    |
| GO:0051224 | negative regulation of protein transport                                                                                        | 3 | 1 | 0.028770805 | 0.057542 [WWP2]    |
| GO:0048678 | response to axon injury                                                                                                         | 3 | 1 | 0.028770805 | 0.057542 [DPYSL3]  |

|            |                                                             |     |   |             |                                                |
|------------|-------------------------------------------------------------|-----|---|-------------|------------------------------------------------|
| GO:0090280 | positive regulation of calcium ion import                   | 3   | 1 | 0.028770805 | 0.057542 [PDGFRB]                              |
| GO:0007204 | elevation of cytosolic calcium ion concentration            | 28  | 2 | 0.029956129 | 0.056138 [CD24, CD55]                          |
| GO:0042127 | regulation of cell proliferation                            | 29  | 2 | 0.031972684 | 0.059682 [PTK2, TCFL5]                         |
| GO:0016579 | protein deubiquitination                                    | 29  | 2 | 0.031972684 | 0.059682 [UCHL1, USP7]                         |
| GO:0030307 | positive regulation of cell growth                          | 30  | 2 | 0.034041115 | 0.063213 [LEF1, SFRP1]                         |
| GO:0030336 | negative regulation of cell migration                       | 30  | 2 | 0.034041115 | 0.063213 [DPYSL3, SFRP1]                       |
| GO:0006468 | protein phosphorylation                                     | 185 | 5 | 0.034694115 | 0.064175 [APP, CDC42BPA, CSNK1E, MAPK3, PRKCZ] |
| GO:0050821 | protein stabilization                                       | 31  | 2 | 0.036160235 | 0.066714 [CLU, HCFC1]                          |
| GO:0009303 | rRNA transcription                                          | 4   | 1 | 0.038176365 | 0.066564 [MKI67IP]                             |
| GO:0010719 | negative regulation of epithelial to mesenchymal transition | 4   | 1 | 0.038176365 | 0.066564 [SFRP1]                               |
| GO:0045047 | protein targeting to ER                                     | 4   | 1 | 0.038176365 | 0.066564 [SEC61A1]                             |
| GO:0016199 | axon midline choice point recognition                       | 4   | 1 | 0.038176365 | 0.066564 [APP]                                 |
| GO:0045725 | positive regulation of glycogen biosynthetic process        | 4   | 1 | 0.038176365 | 0.066564 [PTH]                                 |
| GO:0045663 | positive regulation of myoblast differentiation             | 4   | 1 | 0.038176365 | 0.066564 [BTG1]                                |
| GO:0030214 | hyaluronan catabolic process                                | 4   | 1 | 0.038176365 | 0.066564 [HYAL2]                               |
| GO:0072001 | renal system development                                    | 4   | 1 | 0.038176365 | 0.066564 [BMP4]                                |
| GO:0000085 | G2 phase of mitotic cell cycle                              | 4   | 1 | 0.038176365 | 0.066564 [APP]                                 |
| GO:0071569 | protein ufmylation                                          | 4   | 1 | 0.038176365 | 0.066564 [UBA5]                                |
| GO:0072584 | caveolin-mediated endocytosis                               | 4   | 1 | 0.038176365 | 0.066564 [MAPK3]                               |
| GO:0006942 | regulation of striated muscle contraction                   | 4   | 1 | 0.038176365 | 0.066564 [ATP1A2]                              |
| GO:0035519 | protein K29-linked ubiquitination                           | 4   | 1 | 0.038176365 | 0.066564 [UBE2S]                               |
| GO:0006561 | proline biosynthetic process                                | 4   | 1 | 0.038176365 | 0.066564 [ALDH18A1]                            |
| GO:0048806 | genitalia development                                       | 4   | 1 | 0.038176365 | 0.066564 [FOXF2]                               |
| GO:0007042 | lysosomal lumen acidification                               | 4   | 1 | 0.038176365 | 0.066564 [CLN5]                                |
| GO:0032753 | positive regulation of interleukin-4 production             | 4   | 1 | 0.038176365 | 0.066564 [PRKCZ]                               |
| GO:0048255 | mRNA stabilization                                          | 4   | 1 | 0.038176365 | 0.066564 [PABPC1]                              |
| GO:0022408 | negative regulation of cell-cell adhesion                   | 4   | 1 | 0.038176365 | 0.066564 [LEF1]                                |
| GO:0022409 | positive regulation of cell-cell adhesion                   | 4   | 1 | 0.038176365 | 0.066564 [LEF1]                                |
| GO:0042921 | glucocorticoid receptor signaling pathway                   | 4   | 1 | 0.038176365 | 0.066564 [YWHAH]                               |
| GO:0032872 | regulation of stress-activated MAPK cascade                 | 4   | 1 | 0.038176365 | 0.066564 [MAPK3]                               |
| GO:0042104 | positive regulation of activated T cell proliferation       | 4   | 1 | 0.038176365 | 0.066564 [CD24]                                |
| GO:0050921 | positive regulation of chemotaxis                           | 4   | 1 | 0.038176365 | 0.066564 [PDGFRB]                              |
| GO:0043010 | camera-type eye development                                 | 4   | 1 | 0.038176365 | 0.066564 [WT1]                                 |

|            |                                                                            |    |   |             |                            |
|------------|----------------------------------------------------------------------------|----|---|-------------|----------------------------|
| GO:0043206 | fibril organization                                                        | 4  | 1 | 0.038176365 | 0.066564 [SNCA]            |
| GO:0048268 | clathrin coat assembly                                                     | 4  | 1 | 0.038176365 | 0.066564 [CALY]            |
| GO:0060291 | long-term synaptic potentiation                                            | 4  | 1 | 0.038176365 | 0.066564 [PRKCZ]           |
| GO:0090026 | positive regulation of monocyte chemotaxis                                 | 4  | 1 | 0.038176365 | 0.066564 [CXCL12]          |
| GO:0031295 | T cell costimulation                                                       | 4  | 1 | 0.038176365 | 0.066564 [CD24]            |
| GO:0035067 | negative regulation of histone acetylation                                 | 4  | 1 | 0.038176365 | 0.066564 [SNCA]            |
| GO:0032835 | glomerulus development                                                     | 4  | 1 | 0.038176365 | 0.066564 [WT1]             |
| GO:0051571 | positive regulation of histone H3-K4 methylation                           | 4  | 1 | 0.038176365 | 0.066564 [DNMT1]           |
| GO:0044314 | protein K27-linked ubiquitination                                          | 4  | 1 | 0.038176365 | 0.066564 [UBE2S]           |
| GO:0007530 | sex determination                                                          | 4  | 1 | 0.038176365 | 0.066564 [WT1]             |
| GO:2000774 | positive regulation of cellular senescence                                 | 4  | 1 | 0.038176365 | 0.066564 [HMGA1]           |
| GO:0003337 | mesenchymal to epithelial transition involved in metanephros morphogenesis | 4  | 1 | 0.038176365 | 0.066564 [BMP4]            |
| GO:0002092 | positive regulation of receptor internalization                            | 4  | 1 | 0.038176365 | 0.066564 [ATAD1]           |
| GO:0031032 | actomyosin structure organization                                          | 4  | 1 | 0.038176365 | 0.066564 [CDC42BPA]        |
| GO:0090184 | positive regulation of kidney development                                  | 4  | 1 | 0.038176365 | 0.066564 [BMP4]            |
| GO:0051281 | positive regulation of release of sequestered calcium ion into cytosol     | 4  | 1 | 0.038176365 | 0.066564 [SNCA]            |
| GO:0090170 | regulation of Golgi inheritance                                            | 4  | 1 | 0.038176365 | 0.066564 [MAPK3]           |
| GO:2000641 | regulation of early endosome to late endosome transport                    | 4  | 1 | 0.038176365 | 0.066564 [MAPK3]           |
| GO:0010575 | positive regulation vascular endothelial growth factor production          | 4  | 1 | 0.038176365 | 0.066564 [SULF2]           |
| GO:0031047 | gene silencing by RNA                                                      | 32 | 2 | 0.038328873 | 0.063203 [PRKRA, TNRC6A]   |
| GO:0007218 | neuropeptide signaling pathway                                             | 32 | 2 | 0.038328873 | 0.063203 [CARTPT, CPE]     |
| GO:0001666 | response to hypoxia                                                        | 32 | 2 | 0.038328873 | 0.063203 [CD24, PLOD1]     |
| GO:0006302 | double-strand break repair                                                 | 33 | 2 | 0.040545876 | 0.066475 [DDX1, UIMC1]     |
| GO:0007420 | brain development                                                          | 33 | 2 | 0.040545876 | 0.066475 [CLN5, RAB18]     |
| GO:0045766 | positive regulation of angiogenesis                                        | 34 | 2 | 0.042810108 | 0.069946 [BTG1, GATA6]     |
| GO:0008643 | carbohydrate transport                                                     | 35 | 2 | 0.045120452 | 0.073553 [SLC2A1, SLC37A4] |
| GO:0051168 | nuclear export                                                             | 5  | 1 | 0.047491052 | 0.073714 [LSG1]            |
| GO:0021510 | spinal cord development                                                    | 5  | 1 | 0.047491052 | 0.073714 [SOX4]            |
| GO:0010718 | positive regulation of epithelial to mesenchymal transition                | 5  | 1 | 0.047491052 | 0.073714 [LEF1]            |

|            |                                                                   |   |   |             |                     |
|------------|-------------------------------------------------------------------|---|---|-------------|---------------------|
| GO:0010863 | positive regulation of phospholipase C activity                   | 5 | 1 | 0.047491052 | 0.073714 [PDGFRB]   |
| GO:0045667 | regulation of osteoblast differentiation                          | 5 | 1 | 0.047491052 | 0.073714 [PTK2]     |
| GO:2000020 | positive regulation of male gonad development                     | 5 | 1 | 0.047491052 | 0.073714 [WT1]      |
| GO:0045109 | intermediate filament organization                                | 5 | 1 | 0.047491052 | 0.073714 [NEFL]     |
| GO:0045116 | protein neddylation                                               | 5 | 1 | 0.047491052 | 0.073714 [NAE1]     |
| GO:0042535 | positive regulation of tumor necrosis factor biosynthetic process | 5 | 1 | 0.047491052 | 0.073714 [THBS1]    |
| GO:0072207 | metanephric epithelium development                                | 5 | 1 | 0.047491052 | 0.073714 [WT1]      |
| GO:0072205 | metanephric collecting duct development                           | 5 | 1 | 0.047491052 | 0.073714 [BMP4]     |
| GO:0003007 | heart morphogenesis                                               | 5 | 1 | 0.047491052 | 0.073714 [PTK2]     |
| GO:0006098 | pentose-phosphate shunt                                           | 5 | 1 | 0.047491052 | 0.073714 [PGD]      |
| GO:0046676 | negative regulation of insulin secretion                          | 5 | 1 | 0.047491052 | 0.073714 [SFRP1]    |
| GO:0046488 | phosphatidylinositol metabolic process                            | 5 | 1 | 0.047491052 | 0.073714 [PDGFRB]   |
| GO:0035235 | ionotropic glutamate receptor signaling pathway                   | 5 | 1 | 0.047491052 | 0.073714 [APP]      |
| GO:0033235 | positive regulation of protein sumoylation                        | 5 | 1 | 0.047491052 | 0.073714 [PIAS3]    |
| GO:0007029 | endoplasmic reticulum organization                                | 5 | 1 | 0.047491052 | 0.073714 [ATL1]     |
| GO:0019367 | fatty acid elongation, saturated fatty acid                       | 5 | 1 | 0.047491052 | 0.073714 [ELOVL4]   |
| GO:0006878 | cellular copper ion homeostasis                                   | 5 | 1 | 0.047491052 | 0.073714 [APP]      |
| GO:0007188 | G-protein signaling, coupled to cAMP nucleotide second messenger  | 5 | 1 | 0.047491052 | 0.073714 [PTH1R]    |
| GO:0009952 | anterior/posterior pattern specification                          | 5 | 1 | 0.047491052 | 0.073714 [HOXD3]    |
| GO:0033673 | negative regulation of kinase activity                            | 5 | 1 | 0.047491052 | 0.073714 [PIK3IP1]  |
| GO:0071493 | cellular response to UV-B                                         | 5 | 1 | 0.047491052 | 0.073714 [HYAL2]    |
| GO:0003094 | glomerular filtration                                             | 5 | 1 | 0.047491052 | 0.073714 [SULF2]    |
| GO:0071391 | cellular response to estrogen stimulus                            | 5 | 1 | 0.047491052 | 0.073714 [SFRP1]    |
| GO:0008272 | sulfate transport                                                 | 5 | 1 | 0.047491052 | 0.073714 [SLC26A11] |
| GO:0071280 | cellular response to copper ion                                   | 5 | 1 | 0.047491052 | 0.073714 [SNCA]     |
| GO:0071363 | cellular response to growth factor stimulus                       | 5 | 1 | 0.047491052 | 0.073714 [SFRP1]    |
| GO:0048557 | embryonic digestive tract morphogenesis                           | 5 | 1 | 0.047491052 | 0.073714 [ID2]      |
| GO:0071504 | cellular response to heparin                                      | 5 | 1 | 0.047491052 | 0.073714 [SFRP1]    |
| GO:0071157 | negative regulation of cell cycle arrest                          | 5 | 1 | 0.047491052 | 0.073714 [CDK9]     |
| GO:0007612 | learning                                                          | 5 | 1 | 0.047491052 | 0.073714 [ATAD1]    |
| GO:0016322 | neuron remodeling                                                 | 5 | 1 | 0.047491052 | 0.073714 [APP]      |
| GO:0071333 | cellular response to glucose stimulus                             | 5 | 1 | 0.047491052 | 0.073714 [SOX4]     |



|            |                                                                                  |     |   |             |                                      |
|------------|----------------------------------------------------------------------------------|-----|---|-------------|--------------------------------------|
| GO:0070555 | response to interleukin-1                                                        | 5   | 1 | 0.047491052 | 0.073714 [SNCA]                      |
| GO:0016126 | sterol biosynthetic process                                                      | 5   | 1 | 0.047491052 | 0.073714 [SQLE]                      |
| GO:0016255 | attachment of GPI anchor to protein                                              | 5   | 1 | 0.047491052 | 0.073714 [PIGK]                      |
| GO:0070848 | response to growth factor stimulus                                               | 5   | 1 | 0.047491052 | 0.073714 [GATA6]                     |
| GO:0090398 | cellular senescence                                                              | 5   | 1 | 0.047491052 | 0.073714 [ID2]                       |
| GO:0010564 | regulation of cell cycle process                                                 | 5   | 1 | 0.047491052 | 0.073714 [SFRP1]                     |
| GO:0045839 | negative regulation of mitosis                                                   | 5   | 1 | 0.047491052 | 0.073714 [BMP4]                      |
| GO:0010642 | negative regulation of platelet-derived growth factor receptor signaling pathway | 5   | 1 | 0.047491052 | 0.073714 [SNCA]                      |
| GO:0007165 | signal transduction                                                              | 141 | 4 | 0.048752367 | 0.072218 [PDCL, PDGFRB, PSD, TRIM54] |
| GO:0006096 | glycolysis                                                                       | 37  | 2 | 0.04987509  | 0.073728 [ENO2, PFKL]                |
| GO:0006357 | regulation of transcription from RNA polymerase II promoter                      | 38  | 2 | 0.052317233 | 0.077179 [IKBKAP, WT1]               |
| GO:0016042 | lipid catabolic process                                                          | 87  | 3 | 0.052682808 | 0.077558 [LIPA, PAFAH1B3, PRDX6]     |
| GO:0070374 | positive regulation of ERK1 and ERK2 cascade                                     | 39  | 2 | 0.054801185 | 0.080428 [PDGFRB, PRKCZ]             |
| GO:0043161 | proteasomal ubiquitin-dependent protein catabolic process                        | 39  | 2 | 0.054801185 | 0.080428 [TRIM13, WWP2]              |
| GO:0034976 | response to endoplasmic reticulum stress                                         | 6   | 1 | 0.056715742 | 0.080587 [FAM129A]                   |
| GO:0008045 | motor axon guidance                                                              | 6   | 1 | 0.056715742 | 0.080587 [EPHA4]                     |
| GO:0055074 | calcium ion homeostasis                                                          | 6   | 1 | 0.056715742 | 0.080587 [SNCA]                      |
| GO:0045880 | positive regulation of smoothened signaling pathway                              | 6   | 1 | 0.056715742 | 0.080587 [SFRP1]                     |
| GO:0000186 | activation of MAPKK activity                                                     | 6   | 1 | 0.056715742 | 0.080587 [BMP4]                      |
| GO:0010862 | positive regulation of pathway-restricted SMAD protein phosphorylation           | 6   | 1 | 0.056715742 | 0.080587 [BMP4]                      |
| GO:0045668 | negative regulation of osteoblast differentiation                                | 6   | 1 | 0.056715742 | 0.080587 [TWIST2]                    |
| GO:0048008 | platelet-derived growth factor receptor signaling pathway                        | 6   | 1 | 0.056715742 | 0.080587 [PDGFRB]                    |
| GO:0050777 | negative regulation of immune response                                           | 6   | 1 | 0.056715742 | 0.080587 [AMBP]                      |
| GO:2000379 | positive regulation of reactive oxygen species metabolic process                 | 6   | 1 | 0.056715742 | 0.080587 [PDGFRB]                    |
| GO:0048706 | embryonic skeletal system development                                            | 6   | 1 | 0.056715742 | 0.080587 [SULF2]                     |
| GO:0061001 | regulation of dendritic spine morphogenesis                                      | 6   | 1 | 0.056715742 | 0.080587 [EPHA4]                     |
| GO:0008542 | visual learning                                                                  | 6   | 1 | 0.056715742 | 0.080587 [APP]                       |
| GO:0051893 | regulation of focal adhesion assembly                                            | 6   | 1 | 0.056715742 | 0.080587 [PTK2]                      |

|            |                                                                           |     |   |             |                                            |
|------------|---------------------------------------------------------------------------|-----|---|-------------|--------------------------------------------|
| GO:0051489 | regulation of filopodium assembly                                         | 6   | 1 | 0.056715742 | 0.080587 [GAP43]                           |
| GO:0032319 | regulation of Rho GTPase activity                                         | 6   | 1 | 0.056715742 | 0.080587 [PTK2]                            |
| GO:0006200 | ATP catabolic process                                                     | 6   | 1 | 0.056715742 | 0.080587 [VPS4B]                           |
| GO:0006398 | histone mRNA 3'-end processing                                            | 6   | 1 | 0.056715742 | 0.080587 [CPSF2]                           |
| GO:0032024 | positive regulation of insulin secretion                                  | 6   | 1 | 0.056715742 | 0.080587 [SOX4]                            |
| GO:0035278 | negative regulation of translation involved in gene silencing by miRNA    | 6   | 1 | 0.056715742 | 0.080587 [TNRC6A]                          |
| GO:0031274 | positive regulation of pseudopodium assembly                              | 6   | 1 | 0.056715742 | 0.080587 [CDC42EP4]                        |
| GO:0001890 | placenta development                                                      | 6   | 1 | 0.056715742 | 0.080587 [PTK2]                            |
| GO:2000573 | positive regulation of DNA biosynthetic process                           | 6   | 1 | 0.056715742 | 0.080587 [PDGFRB]                          |
| GO:0044344 | cellular response to fibroblast growth factor stimulus                    | 6   | 1 | 0.056715742 | 0.080587 [SFRP1]                           |
| GO:0017144 | drug metabolic process                                                    | 6   | 1 | 0.056715742 | 0.080587 [VKORC1]                          |
| GO:0001958 | endochondral ossification                                                 | 6   | 1 | 0.056715742 | 0.080587 [BMP4]                            |
| GO:0030279 | negative regulation of ossification                                       | 6   | 1 | 0.056715742 | 0.080587 [SFRP1]                           |
| GO:0001921 | positive regulation of receptor recycling                                 | 6   | 1 | 0.056715742 | 0.080587 [SNCA]                            |
| GO:0043983 | histone H4-K12 acetylation                                                | 6   | 1 | 0.056715742 | 0.080587 [MEAF6]                           |
| GO:0001933 | negative regulation of protein phosphorylation                            | 6   | 1 | 0.056715742 | 0.080587 [FAM129A]                         |
| GO:0007399 | nervous system development                                                | 214 | 5 | 0.058047358 | 0.080011 [DCTN1, EPHA4, GAP43, INA, NRSN1] |
| GO:0022900 | electron transport chain                                                  | 41  | 2 | 0.059890396 | 0.082234 [CYBA, FADS1]                     |
| GO:0006886 | intracellular protein transport                                           | 41  | 2 | 0.059890396 | 0.082234 [SNX17, YWHAH]                    |
| GO:0000910 | cytokinesis                                                               | 41  | 2 | 0.059890396 | 0.082234 [BECN1, RALB]                     |
| GO:0006633 | fatty acid biosynthetic process                                           | 42  | 2 | 0.062493634 | 0.085316 [ELOVL4, SCD]                     |
| GO:0071260 | cellular response to mechanical stimulus                                  | 42  | 2 | 0.062493634 | 0.085316 [HABP4, MAPK3]                    |
| GO:0030182 | neuron differentiation                                                    | 42  | 2 | 0.062493634 | 0.085316 [FZD5, ITM2C]                     |
| GO:0045088 | regulation of innate immune response                                      | 7   | 1 | 0.065851303 | 0.08772 [SAMHD1]                           |
| GO:0006625 | protein targeting to peroxisome                                           | 7   | 1 | 0.065851303 | 0.08772 [PEX19]                            |
| GO:0051090 | regulation of sequence-specific DNA binding transcription factor activity | 7   | 1 | 0.065851303 | 0.08772 [USP7]                             |
| GO:0048870 | cell motility                                                             | 7   | 1 | 0.065851303 | 0.08772 [PTK2]                             |
| GO:0022008 | neurogenesis                                                              | 7   | 1 | 0.065851303 | 0.08772 [CLN5]                             |
| GO:0006707 | cholesterol catabolic process                                             | 7   | 1 | 0.065851303 | 0.08772 [SNX17]                            |
| GO:0045600 | positive regulation of fat cell differentiation                           | 7   | 1 | 0.065851303 | 0.08772 [SFRP1]                            |
| GO:0050770 | regulation of axonogenesis                                                | 7   | 1 | 0.065851303 | 0.08772 [EPHA4]                            |
| GO:0042769 | DNA damage response, detection of DNA damage                              | 7   | 1 | 0.065851303 | 0.08772 [SOX4]                             |

|            |                                                                |    |   |             |                               |
|------------|----------------------------------------------------------------|----|---|-------------|-------------------------------|
| GO:0042761 | very long-chain fatty acid biosynthetic process                | 7  | 1 | 0.065851303 | 0.08772 [ELOVL4]              |
| GO:0048704 | embryonic skeletal system morphogenesis                        | 7  | 1 | 0.065851303 | 0.08772 [HOXD3]               |
| GO:0030878 | thyroid gland development                                      | 7  | 1 | 0.065851303 | 0.08772 [HOXD3]               |
| GO:0035518 | histone H2A monoubiquitination                                 | 7  | 1 | 0.065851303 | 0.08772 [RING1]               |
| GO:0042326 | negative regulation of phosphorylation                         | 7  | 1 | 0.065851303 | 0.08772 [BMP4]                |
| GO:0032314 | regulation of Rac GTPase activity                              | 7  | 1 | 0.065851303 | 0.08772 [EPHA4]               |
| GO:0006103 | 2-oxoglutarate metabolic process                               | 7  | 1 | 0.065851303 | 0.08772 [IDH1]                |
| GO:0048485 | sympathetic nervous system development                         | 7  | 1 | 0.065851303 | 0.08772 [SOX4]                |
| GO:0043923 | positive regulation by host of viral transcription             | 7  | 1 | 0.065851303 | 0.08772 [LEF1]                |
| GO:0060395 | SMAD protein signal transduction                               | 7  | 1 | 0.065851303 | 0.08772 [BMP4]                |
| GO:0042572 | retinol metabolic process                                      | 7  | 1 | 0.065851303 | 0.08772 [RDH11]               |
| GO:0085020 | protein K6-linked ubiquitination                               | 7  | 1 | 0.065851303 | 0.08772 [UBE2S]               |
| GO:0050808 | synapse organization                                           | 7  | 1 | 0.065851303 | 0.08772 [NLGN3]               |
| GO:0034341 | response to interferon-gamma                                   | 7  | 1 | 0.065851303 | 0.08772 [SNCA]                |
| GO:0051092 | positive regulation of NF-kappaB transcription factor activity | 45 | 2 | 0.070526081 | 0.09189 [CLU, PRKCZ]          |
| GO:0016567 | protein ubiquitination                                         | 99 | 3 | 0.071754129 | 0.09332 [DCAF10, UBE2C, WWP2] |
| GO:0030335 | positive regulation of cell migration                          | 46 | 2 | 0.073274619 | 0.095037 [LEF1, PTK2]         |
| GO:0006869 | lipid transport                                                | 46 | 2 | 0.073274619 | 0.095037 [APOO, PLTP]         |
| GO:0031397 | negative regulation of protein ubiquitination                  | 8  | 1 | 0.074898593 | 0.095752 [SOX4]               |
| GO:0045664 | regulation of neuron differentiation                           | 8  | 1 | 0.074898593 | 0.095752 [YWHAH]              |
| GO:0033628 | regulation of cell adhesion mediated by integrin               | 8  | 1 | 0.074898593 | 0.095752 [PTK2]               |
| GO:0042325 | regulation of phosphorylation                                  | 8  | 1 | 0.074898593 | 0.095752 [CD24]               |
| GO:0046326 | positive regulation of glucose import                          | 8  | 1 | 0.074898593 | 0.095752 [PTH]                |
| GO:0035176 | social behavior                                                | 8  | 1 | 0.074898593 | 0.095752 [NLGN3]              |
| GO:0035810 | positive regulation of urine volume                            | 8  | 1 | 0.074898593 | 0.095752 [HYAL2]              |
| GO:0070527 | platelet aggregation                                           | 8  | 1 | 0.074898593 | 0.095752 [STXBP1]             |
| GO:0006309 | DNA fragmentation involved in apoptotic nuclear change         | 8  | 1 | 0.074898593 | 0.095752 [SFRP1]              |
| GO:0007613 | memory                                                         | 8  | 1 | 0.074898593 | 0.095752 [ATAD1]              |
| GO:2001237 | negative regulation of extrinsic apoptotic signaling pathway   | 8  | 1 | 0.074898593 | 0.095752 [SRC]                |
| GO:0071230 | cellular response to amino acid stimulus                       | 8  | 1 | 0.074898593 | 0.095752 [RRAGB]              |
| GO:0071320 | cellular response to cAMP                                      | 8  | 1 | 0.074898593 | 0.095752 [WT1]                |

|            |                                                                                               |     |   |             |                                                                                  |
|------------|-----------------------------------------------------------------------------------------------|-----|---|-------------|----------------------------------------------------------------------------------|
| GO:0001942 | hair follicle development                                                                     | 8   | 1 | 0.074898593 | 0.095752 [APCDD1]                                                                |
| GO:0001525 | angiogenesis                                                                                  | 102 | 3 | 0.076943029 | 0.097062 [COL8A1, PTK2, TGFBI]                                                   |
| GO:0030100 | regulation of endocytosis                                                                     | 9   | 1 | 0.083858464 | 0.104676 [SNX17]                                                                 |
| GO:0045840 | positive regulation of mitosis                                                                | 9   | 1 | 0.083858464 | 0.104676 [PDGFRB]                                                                |
| GO:0030819 | positive regulation of cAMP biosynthetic process                                              | 9   | 1 | 0.083858464 | 0.104676 [AKAP12]                                                                |
| GO:0045665 | negative regulation of neuron differentiation                                                 | 9   | 1 | 0.083858464 | 0.104676 [ID2]                                                                   |
| GO:0006513 | protein monoubiquitination                                                                    | 9   | 1 | 0.083858464 | 0.104676 [UBE2R2]                                                                |
| GO:0006611 | protein export from nucleus                                                                   | 9   | 1 | 0.083858464 | 0.104676 [XPO7]                                                                  |
| GO:0030513 | positive regulation of BMP signaling pathway                                                  | 9   | 1 | 0.083858464 | 0.104676 [BMP4]                                                                  |
| GO:0001837 | epithelial to mesenchymal transition                                                          | 9   | 1 | 0.083858464 | 0.104676 [FOXF2]                                                                 |
| GO:0042355 | L-fucose catabolic process                                                                    | 9   | 1 | 0.083858464 | 0.104676 [FUT8]                                                                  |
| GO:0090200 | positive regulation of release of cytochrome c from mitochondria                              | 9   | 1 | 0.083858464 | 0.104676 [MLLT11]                                                                |
| GO:0051402 | neuron apoptosis                                                                              | 9   | 1 | 0.083858464 | 0.104676 [APP]                                                                   |
| GO:0006811 | ion transport                                                                                 | 455 | 8 | 0.088679618 | 0.109545 [ANO10, ATP6AP1, ATP6V1B2, ATP6V1H, FXYD6, SLC22A17, SLC26A11, SLC39A7] |
| GO:0007283 | spermatogenesis                                                                               | 174 | 4 | 0.089612007 | 0.110506 [CCNI, DZIP1, PNMA1, TCFL5]                                             |
| GO:0006750 | glutathione biosynthetic process                                                              | 10  | 1 | 0.092731759 | 0.112603 [GGT7]                                                                  |
| GO:0042632 | cholesterol homeostasis                                                                       | 10  | 1 | 0.092731759 | 0.112603 [CD24]                                                                  |
| GO:0045332 | phospholipid translocation                                                                    | 10  | 1 | 0.092731759 | 0.112603 [ATP9A]                                                                 |
| GO:0048754 | branching morphogenesis of a tube                                                             | 10  | 1 | 0.092731759 | 0.112603 [BMP4]                                                                  |
| GO:0045787 | positive regulation of cell cycle                                                             | 10  | 1 | 0.092731759 | 0.112603 [HCFC1]                                                                 |
| GO:0006099 | tricarboxylic acid cycle                                                                      | 10  | 1 | 0.092731759 | 0.112603 [IDH1]                                                                  |
| GO:0006957 | complement activation, alternative pathway                                                    | 10  | 1 | 0.092731759 | 0.112603 [CFH]                                                                   |
| GO:0007026 | negative regulation of microtubule depolymerization                                           | 10  | 1 | 0.092731759 | 0.112603 [TRIM54]                                                                |
| GO:0048167 | regulation of synaptic plasticity                                                             | 10  | 1 | 0.092731759 | 0.112603 [YWHAH]                                                                 |
| GO:0006977 | DNA damage response, signal transduction by p53 class mediator resulting in cell cycle arrest | 10  | 1 | 0.092731759 | 0.112603 [SOX4]                                                                  |
| GO:0009966 | regulation of signal transduction                                                             | 10  | 1 | 0.092731759 | 0.112603 [MTCH1]                                                                 |
| GO:0001823 | mesonephros development                                                                       | 10  | 1 | 0.092731759 | 0.112603 [BMP4]                                                                  |
| GO:0032007 | negative regulation of TOR signaling cascade                                                  | 10  | 1 | 0.092731759 | 0.112603 [TMEM127]                                                               |
| GO:0001657 | ureteric bud development                                                                      | 10  | 1 | 0.092731759 | 0.112603 [WT1]                                                                   |
| GO:0001654 | eye development                                                                               | 10  | 1 | 0.092731759 | 0.112603 [RAB18]                                                                 |
| GO:0031648 | protein destabilization                                                                       | 10  | 1 | 0.092731759 | 0.112603 [SNCA]                                                                  |

|            |                                                               |    |   |             |                             |
|------------|---------------------------------------------------------------|----|---|-------------|-----------------------------|
| GO:0008299 | isoprenoid biosynthetic process                               | 10 | 1 | 0.092731759 | 0.112603 [FDFT1]            |
| GO:0007059 | chromosome segregation                                        | 55 | 2 | 0.099433705 | 0.118921 [PPP2R1A, SLC25A5] |
| GO:0007265 | Ras protein signal transduction                               | 11 | 1 | 0.101519311 | 0.120407 [RGL2]             |
| GO:0030317 | sperm motility                                                | 11 | 1 | 0.101519311 | 0.120407 [SORD]             |
| GO:0034504 | protein localization to nucleus                               | 11 | 1 | 0.101519311 | 0.120407 [BMP4]             |
| GO:0046677 | response to antibiotic                                        | 11 | 1 | 0.101519311 | 0.120407 [HYAL2]            |
| GO:0006891 | intra-Golgi vesicle-mediated transport                        | 11 | 1 | 0.101519311 | 0.120407 [COPB1]            |
| GO:0046329 | negative regulation of JNK cascade                            | 11 | 1 | 0.101519311 | 0.120407 [AMBP]             |
| GO:0051017 | actin filament bundle assembly                                | 11 | 1 | 0.101519311 | 0.120407 [DPYSL3]           |
| GO:0007626 | locomotory behavior                                           | 11 | 1 | 0.101519311 | 0.120407 [APP]              |
| GO:0031647 | regulation of protein stability                               | 11 | 1 | 0.101519311 | 0.120407 [SOX4]             |
| GO:0007229 | integrin-mediated signaling pathway                           | 57 | 2 | 0.105556982 | 0.124164 [ITGB5, PTK2]      |
| GO:0034446 | substrate adhesion-dependent cell spreading                   | 12 | 1 | 0.110221947 | 0.128803 [ANTXR1]           |
| GO:0006284 | base-excision repair                                          | 12 | 1 | 0.110221947 | 0.128803 [HMGA1]            |
| GO:0051898 | negative regulation of protein kinase B signaling cascade     | 12 | 1 | 0.110221947 | 0.128803 [HYAL2]            |
| GO:0048041 | focal adhesion assembly                                       | 12 | 1 | 0.110221947 | 0.128803 [ACTN1]            |
| GO:0043968 | histone H2A acetylation                                       | 12 | 1 | 0.110221947 | 0.128803 [MEAF6]            |
| GO:0032008 | positive regulation of TOR signaling cascade                  | 12 | 1 | 0.110221947 | 0.128803 [RRAGB]            |
| GO:0060021 | palate development                                            | 12 | 1 | 0.110221947 | 0.128803 [FOXF2]            |
| GO:0018298 | protein-chromophore linkage                                   | 13 | 1 | 0.118840487 | 0.137747 [AMBP]             |
| GO:0034613 | cellular protein localization                                 | 13 | 1 | 0.118840487 | 0.137747 [RRAGB]            |
| GO:0002062 | chondrocyte differentiation                                   | 13 | 1 | 0.118840487 | 0.137747 [BMP4]             |
| GO:0007249 | I-kappaB kinase/NF-kappaB cascade                             | 14 | 1 | 0.127375741 | 0.146688 [TBK1]             |
| GO:0006829 | zinc ion transport                                            | 14 | 1 | 0.127375741 | 0.146688 [SLC39A7]          |
| GO:0030163 | protein catabolic process                                     | 14 | 1 | 0.127375741 | 0.146688 [CLN5]             |
| GO:0001570 | vasculogenesis                                                | 14 | 1 | 0.127375741 | 0.146688 [WT1]              |
| GO:0017148 | negative regulation of translation                            | 14 | 1 | 0.127375741 | 0.146688 [WT1]              |
| GO:0045860 | positive regulation of protein kinase activity                | 15 | 1 | 0.135828512 | 0.154306 [PTK2]             |
| GO:0055072 | iron ion homeostasis                                          | 15 | 1 | 0.135828512 | 0.154306 [SLC22A17]         |
| GO:0050680 | negative regulation of epithelial cell proliferation          | 15 | 1 | 0.135828512 | 0.154306 [SFRP1]            |
| GO:0050679 | positive regulation of epithelial cell proliferation          | 15 | 1 | 0.135828512 | 0.154306 [SFRP1]            |
| GO:0071560 | cellular response to transforming growth factor beta stimulus | 15 | 1 | 0.135828512 | 0.154306 [SFRP1]            |

|            |                                                              |     |   |             |                                                                     |
|------------|--------------------------------------------------------------|-----|---|-------------|---------------------------------------------------------------------|
| GO:0006952 | defense response                                             | 15  | 1 | 0.135828512 | 0.154306 [MLF2]                                                     |
| GO:0007031 | peroxisome organization                                      | 15  | 1 | 0.135828512 | 0.154306 [PEX19]                                                    |
| GO:0008544 | epidermis development                                        | 15  | 1 | 0.135828512 | 0.154306 [PLOD1]                                                    |
| GO:2001244 | positive regulation of intrinsic apoptotic signaling pathway | 15  | 1 | 0.135828512 | 0.154306 [CLU]                                                      |
| GO:0010595 | positive regulation of endothelial cell migration            | 15  | 1 | 0.135828512 | 0.154306 [BMP4]                                                     |
| GO:0030198 | extracellular matrix organization                            | 15  | 1 | 0.135828512 | 0.154306 [APP]                                                      |
| GO:0007565 | female pregnancy                                             | 15  | 1 | 0.135828512 | 0.154306 [AMBP]                                                     |
| GO:0050896 | response to stimulus                                         | 589 | 2 | 0.137053021 | 0.154104 [PDCL, TGFBI]                                              |
| GO:0051297 | centrosome organization                                      | 16  | 1 | 0.144199594 | 0.161377 [CHD3]                                                     |
| GO:0045666 | positive regulation of neuron differentiation                | 16  | 1 | 0.144199594 | 0.161377 [HOXD3]                                                    |
| GO:0007264 | small GTPase mediated signal transduction                    | 16  | 1 | 0.144199594 | 0.161377 [RAB18]                                                    |
| GO:0045931 | positive regulation of mitotic cell cycle                    | 16  | 1 | 0.144199594 | 0.161377 [APP]                                                      |
| GO:0051262 | protein tetramerization                                      | 16  | 1 | 0.144199594 | 0.161377 [NUDT21]                                                   |
| GO:0030154 | cell differentiation                                         | 484 | 8 | 0.151345164 | 0.168581 [CSRP2, DZIP1, FAM82A2, GAP43, INA, LECT1, NFATC4, TRIM54] |
| GO:0030855 | epithelial cell differentiation                              | 17  | 1 | 0.152489777 | 0.169065 [WT1]                                                      |
| GO:0043967 | histone H4 acetylation                                       | 17  | 1 | 0.152489777 | 0.169065 [LEF1]                                                     |
| GO:0042476 | odontogenesis                                                | 17  | 1 | 0.152489777 | 0.169065 [BMP4]                                                     |
| GO:0032496 | response to lipopolysaccharide                               | 17  | 1 | 0.152489777 | 0.169065 [SNCA]                                                     |
| GO:0001938 | positive regulation of endothelial cell proliferation        | 17  | 1 | 0.152489777 | 0.169065 [BMP4]                                                     |
| GO:0045739 | positive regulation of DNA repair                            | 18  | 1 | 0.160699839 | 0.177067 [UIMC1]                                                    |
| GO:0000187 | activation of MAPK activity                                  | 18  | 1 | 0.160699839 | 0.177067 [SHC1]                                                     |
| GO:0010976 | positive regulation of neuron projection development         | 18  | 1 | 0.160699839 | 0.177067 [DPYSL3]                                                   |
| GO:0006874 | cellular calcium ion homeostasis                             | 19  | 1 | 0.168830553 | 0.185169 [PTH]                                                      |
| GO:0007160 | cell-matrix adhesion                                         | 19  | 1 | 0.168830553 | 0.185169 [HOXD3]                                                    |
| GO:0007224 | smoothened signaling pathway                                 | 19  | 1 | 0.168830553 | 0.185169 [BMP4]                                                     |
| GO:0019370 | leukotriene biosynthetic process                             | 20  | 1 | 0.176882685 | 0.193258 [GGT7]                                                     |
| GO:0016338 | calcium-independent cell-cell adhesion                       | 20  | 1 | 0.176882685 | 0.193258 [CLDN11]                                                   |
| GO:0006364 | rRNA processing                                              | 80  | 2 | 0.181664171 | 0.198028 [EXOSC1, PA2G4]                                            |
| GO:0000165 | MAPK cascade                                                 | 21  | 1 | 0.184856991 | 0.200895 [SHC1]                                                     |
| GO:0031572 | G2/M transition DNA damage checkpoint                        | 21  | 1 | 0.184856991 | 0.200895 [UIMC1]                                                    |
| GO:0031175 | neuron projection development                                | 21  | 1 | 0.184856991 | 0.200895 [APP]                                                      |
| GO:0048013 | ephrin receptor signaling pathway                            | 22  | 1 | 0.192754224 | 0.208683 [PTK2]                                                     |

|            |                                                                                  |     |   |             |                                              |
|------------|----------------------------------------------------------------------------------|-----|---|-------------|----------------------------------------------|
| GO:0042254 | ribosome biogenesis                                                              | 22  | 1 | 0.192754224 | 0.208683 [RSL24D1]                           |
| GO:0045944 | positive regulation of transcription from RNA polymerase II promoter             | 158 | 3 | 0.197915731 | 0.213785 [GATA6, RNF10, SOX4]                |
| GO:0060070 | canonical Wnt receptor signaling pathway                                         | 23  | 1 | 0.200575124 | 0.21633 [LEF1]                               |
| GO:0016055 | Wnt receptor signaling pathway                                                   | 87  | 2 | 0.206204425 | 0.222066 [AES, CD24]                         |
| GO:0051301 | cell division                                                                    | 285 | 5 | 0.206463029 | 0.22201 [CDK19, SEPT11, UBE2C, UBE2S, VPS4B] |
| GO:0051865 | protein autoubiquitination                                                       | 25  | 1 | 0.215990869 | 0.231558 [TRIM13]                            |
| GO:0001501 | skeletal system development                                                      | 25  | 1 | 0.215990869 | 0.231558 [SOX4]                              |
| GO:0006338 | chromatin remodeling                                                             | 25  | 1 | 0.215990869 | 0.231558 [CBX3]                              |
| GO:0008610 | lipid biosynthetic process                                                       | 26  | 1 | 0.223587164 | 0.238805 [ACLY]                              |
| GO:0030433 | ER-associated protein catabolic process                                          | 26  | 1 | 0.223587164 | 0.238805 [TRIM13]                            |
| GO:0010212 | response to ionizing radiation                                                   | 27  | 1 | 0.23111003  | 0.246104 [UIMC1]                             |
| GO:0043966 | histone H3 acetylation                                                           | 27  | 1 | 0.23111003  | 0.246104 [LEF1]                              |
| GO:0060271 | cilium morphogenesis                                                             | 28  | 1 | 0.238560174 | 0.253282 [ASAP1]                             |
| GO:0007411 | axon guidance                                                                    | 28  | 1 | 0.238560174 | 0.253282 [PTK2]                              |
| GO:0007601 | visual perception                                                                | 97  | 2 | 0.241784814 | 0.256134 [PDCL, TGFBI]                       |
| GO:0030097 | hemopoiesis                                                                      | 29  | 1 | 0.245938299 | 0.259763 [BCL11A]                            |
| GO:0016525 | negative regulation of angiogenesis                                              | 29  | 1 | 0.245938299 | 0.259763 [THBS1]                             |
| GO:0007417 | central nervous system development                                               | 29  | 1 | 0.245938299 | 0.259763 [PNMA1]                             |
| GO:0009790 | embryo development                                                               | 31  | 1 | 0.26048126  | 0.274312 [PTK2]                              |
| GO:0006950 | response to stress                                                               | 104 | 2 | 0.266856434 | 0.280612 [FAM129A, SERPINH1]                 |
| GO:0006919 | activation of cysteine-type endopeptidase activity involved in apoptotic process | 32  | 1 | 0.267647466 | 0.28103 [MTCH1]                              |
| GO:0007268 | synaptic transmission                                                            | 33  | 1 | 0.274744391 | 0.288058 [CARTPT]                            |
| GO:0009968 | negative regulation of signal transduction                                       | 36  | 1 | 0.295626127 | 0.30927 [RGS4]                               |
| GO:0006914 | autophagy                                                                        | 36  | 1 | 0.295626127 | 0.30927 [TM9SF1]                             |
| GO:0007507 | heart development                                                                | 37  | 1 | 0.302452545 | 0.315718 [WT1]                               |
| GO:0030521 | androgen receptor signaling pathway                                              | 38  | 1 | 0.309212959 | 0.322304 [NCOA2]                             |
| GO:0001558 | regulation of cell growth                                                        | 39  | 1 | 0.315908006 | 0.328802 [MORF4L2]                           |
| GO:0006511 | ubiquitin-dependent protein catabolic process                                    | 40  | 1 | 0.322538316 | 0.334971 [UBE2C]                             |
| GO:0006979 | response to oxidative stress                                                     | 40  | 1 | 0.322538316 | 0.334971 [PRDX6]                             |
| GO:0051781 | positive regulation of cell division                                             | 41  | 1 | 0.329104514 | 0.341046 [PTN]                               |
| GO:0007267 | cell-cell signaling                                                              | 42  | 1 | 0.335607218 | 0.347281 [FADS1]                             |
| GO:0030036 | actin cytoskeleton organization                                                  | 43  | 1 | 0.342047042 | 0.353432 [EPB41]                             |

|            |                                             |     |   |             |                                        |
|------------|---------------------------------------------|-----|---|-------------|----------------------------------------|
| GO:0008654 | phospholipid biosynthetic process           | 44  | 1 | 0.34842459  | 0.359502 [FADS1]                       |
| GO:0006954 | inflammatory response                       | 128 | 2 | 0.352134297 | 0.362805 [PRKCZ, TBK1]                 |
| GO:0035556 | intracellular signal transduction           | 48  | 1 | 0.373323971 | 0.383806 [MAGI3]                       |
| GO:0006351 | transcription, DNA-dependent                | 48  | 1 | 0.373323971 | 0.383806 [HOXD3]                       |
| GO:0006631 | fatty acid metabolic process                | 50  | 1 | 0.385415363 | 0.395099 [HSD17B4]                     |
| GO:0010923 | negative regulation of phosphatase activity | 50  | 1 | 0.385415363 | 0.395099 [MKI67IP]                     |
| GO:0016337 | cell-cell adhesion                          | 51  | 1 | 0.391373494 | 0.400345 [CD24]                        |
| GO:0007050 | cell cycle arrest                           | 52  | 1 | 0.397273997 | 0.405799 [GAS2]                        |
| GO:0006397 | mRNA processing                             | 144 | 2 | 0.407124384 | 0.415267 [DDX1, NUDT21]                |
| GO:0007126 | meiosis                                     | 60  | 1 | 0.442469072 | 0.450353 [PPP2CA]                      |
| GO:0030030 | cell projection organization                | 60  | 1 | 0.442469072 | 0.450353 [ASAP1]                       |
| GO:0006935 | chemotaxis                                  | 71  | 1 | 0.499142999 | 0.506593 [CXCL12]                      |
| GO:0007010 | cytoskeleton organization                   | 71  | 1 | 0.499142999 | 0.506593 [FMNL3]                       |
| GO:0006310 | DNA recombination                           | 73  | 1 | 0.508811826 | 0.515307 [RPA1]                        |
| GO:0006814 | sodium ion transport                        | 82  | 1 | 0.550068098 | 0.556301 [ATP1A2]                      |
| GO:0006916 | anti-apoptosis                              | 84  | 1 | 0.558756008 | 0.564288 [SNCA]                        |
| GO:0008283 | cell proliferation                          | 90  | 1 | 0.583828318 | 0.588776 [HDGFRP3]                     |
| GO:0006260 | DNA replication                             | 93  | 1 | 0.595826277 | 0.600028 [NAE1]                        |
| GO:0006813 | potassium ion transport                     | 102 | 1 | 0.629788868 | 0.633337 [ATP1A2]                      |
| GO:0008150 | biological_process                          | 588 | 4 | 0.669294047 | 0.672118 [ABHD11, FLRT2, FXYP6, MFAP1] |
| GO:0006955 | immune response                             | 220 | 1 | 0.728573407 | 0.73062 [SAMHD1]                       |
| GO:0007067 | mitosis                                     | 159 | 1 | 1           | 1 [UBE2C]                              |
| GO:0006281 | DNA repair                                  | 147 | 1 | 1           | 1 [MORF4L2]                            |

---



Table S5-3. GO annotation analysis of the module eigengene in the common module between LT and LDE (postnatal\_turquoise vs turquoise).

| GO ID      | GO Name                                                                                                                                                   | Total Coun | Diff Coun | P Value    | FDR         | Gene                            |
|------------|-----------------------------------------------------------------------------------------------------------------------------------------------------------|------------|-----------|------------|-------------|---------------------------------|
| GO:0008380 | RNA splicing                                                                                                                                              | 150        | 4         | 7.5458E-05 | 0.007772147 | [DDX20, DDX47, PPP2CA, SYNCRIP] |
| GO:0000184 | nuclear-transcribed mRNA catabolic process, nonsense-mediated d                                                                                           | 27         | 2         | 0.00074014 | 0.038117424 | [EIF3E, PAN2]                   |
| GO:0006772 | thiamine metabolic process                                                                                                                                | 1          | 1         | 0.00148101 | 0.043583976 | [THTPA]                         |
| GO:0000462 | maturation of SSU-rRNA from tricistronic rRNA transcript                                                                                                  | 1          | 1         | 0.00148101 | 0.043583976 | [NOP14]                         |
| GO:0006120 | mitochondrial electron transport, NADH to ubiquinone                                                                                                      | 42         | 2         | 0.00178976 | 0.036869128 | [NDUFB9, NDUFS4]                |
| GO:0006810 | transport                                                                                                                                                 | 395        | 4         | 0.00283905 | 0.048737058 | [MTCH2, NDUFB9, NDUFS4, TXN]    |
| GO:0000480 | endonucleolytic cleavage in 5'-ETS of tricistronic rRNA transcript                                                                                        | 2          | 1         | 0.00295986 | 0.030486539 | [NOP14]                         |
| GO:0051967 | negative regulation of synaptic transmission, glutamatergic                                                                                               | 2          | 1         | 0.00295986 | 0.030486539 | [ATAD1]                         |
| GO:0032963 | collagen metabolic process                                                                                                                                | 2          | 1         | 0.00295986 | 0.030486539 | [TNXB]                          |
| GO:0051083 | 'de novo' cotranslational protein folding                                                                                                                 | 2          | 1         | 0.00295986 | 0.030486539 | [DNAJC2]                        |
| GO:0000447 | endonucleolytic cleavage in ITS1 to separate SSU-rRNA from<br>5.8S rRNA and LSU-rRNA from tricistronic rRNA transcript<br>(SSU-rRNA, 5.8S rRNA, LSU-rRNA) | 2          | 1         | 0.00295986 | 0.030486539 | [NOP14]                         |
| GO:0000472 | endonucleolytic cleavage to generate mature 5'-end of SSU-rRNA<br>from (SSU-rRNA, 5.8S rRNA, LSU-rRNA)                                                    | 2          | 1         | 0.00295986 | 0.030486539 | [NOP14]                         |
| GO:0001672 | regulation of chromatin assembly or disassembly                                                                                                           | 2          | 1         | 0.00295986 | 0.030486539 | [TLK1]                          |
| GO:0048251 | elastic fiber assembly                                                                                                                                    | 3          | 1         | 0.00443655 | 0.028560295 | [TNXB]                          |
| GO:0042518 | negative regulation of tyrosine phosphorylation of Stat3 protein                                                                                          | 3          | 1         | 0.00443655 | 0.028560295 | [PPP2CA]                        |
| GO:0019932 | second-messenger-mediated signaling                                                                                                                       | 3          | 1         | 0.00443655 | 0.028560295 | [PPP2CA]                        |
| GO:0071168 | protein localization to chromatin                                                                                                                         | 3          | 1         | 0.00443655 | 0.028560295 | [RAD21]                         |
| GO:0033158 | regulation of protein import into nucleus, translocation                                                                                                  | 3          | 1         | 0.00443655 | 0.028560295 | [TXN]                           |
| GO:0006646 | phosphatidylethanolamine biosynthetic process                                                                                                             | 4          | 1         | 0.00591109 | 0.03122268  | [CHKB]                          |
| GO:0002092 | positive regulation of receptor internalization                                                                                                           | 4          | 1         | 0.00591109 | 0.03122268  | [ATAD1]                         |
| GO:0006364 | rRNA processing                                                                                                                                           | 80         | 2         | 0.0063354  | 0.031073642 | [DDX47, NOP14]                  |
| GO:0007498 | mesoderm development                                                                                                                                      | 5          | 1         | 0.00738348 | 0.033065143 | [MESDC2]                        |
| GO:0007612 | learning                                                                                                                                                  | 5          | 1         | 0.00738348 | 0.033065143 | [ATAD1]                         |
| GO:0070934 | CRD-mediated mRNA stabilization                                                                                                                           | 5          | 1         | 0.00738348 | 0.033065143 | [SYNCRIP]                       |
| GO:0051591 | response to cAMP                                                                                                                                          | 6          | 1         | 0.00885372 | 0.035074352 | [NDUFS4]                        |
| GO:0010508 | positive regulation of autophagy                                                                                                                          | 6          | 1         | 0.00885372 | 0.035074352 | [MTDH]                          |
| GO:0045947 | negative regulation of translational initiation                                                                                                           | 6          | 1         | 0.00885372 | 0.035074352 | [EIF3E]                         |
| GO:0000188 | inactivation of MAPK activity                                                                                                                             | 7          | 1         | 0.01032182 | 0.036660247 | [PPP2CA]                        |
| GO:0006275 | regulation of DNA replication                                                                                                                             | 7          | 1         | 0.01032182 | 0.036660247 | [PPP2CA]                        |

|                                                                                                      |     |   |            |             |                       |
|------------------------------------------------------------------------------------------------------|-----|---|------------|-------------|-----------------------|
| GO:0030111 regulation of Wnt receptor signaling pathway                                              | 7   | 1 | 0.01032182 | 0.036660247 | [PPP2CA]              |
| GO:0006091 generation of precursor metabolites and energy                                            | 8   | 1 | 0.01178777 | 0.037358174 | [THTPA]               |
| GO:0006396 RNA processing                                                                            | 8   | 1 | 0.01178777 | 0.037358174 | [SETX]                |
| GO:0019933 cAMP-mediated signaling                                                                   | 8   | 1 | 0.01178777 | 0.037358174 | [NDUFS4]              |
| GO:0007613 memory                                                                                    | 8   | 1 | 0.01178777 | 0.037358174 | [ATAD1]               |
| GO:0006915 apoptotic process                                                                         | 321 | 3 | 0.01212148 | 0.035671798 | [CCAR1, DDX47, RAD21] |
| GO:0009615 response to virus                                                                         | 114 | 2 | 0.01250379 | 0.035774742 | [BECN1, PSMA2]        |
| GO:0048146 positive regulation of fibroblast proliferation                                           | 9   | 1 | 0.01325159 | 0.035918786 | [NDUFS4]              |
| GO:0006672 ceramide metabolic process                                                                | 9   | 1 | 0.01325159 | 0.035918786 | [PPP2CA]              |
| GO:0042149 cellular response to glucose starvation                                                   | 9   | 1 | 0.01325159 | 0.035918786 | [HSPA5]               |
| GO:0043066 negative regulation of apoptotic process                                                  | 118 | 2 | 0.01335005 | 0.034376373 | [HSPA5, MTDH]         |
| GO:0043388 positive regulation of DNA binding                                                        | 10  | 1 | 0.01471327 | 0.036082553 | [TXN]                 |
| GO:0009314 response to radiation                                                                     | 10  | 1 | 0.01471327 | 0.036082553 | [TXN]                 |
| GO:0016311 dephosphorylation                                                                         | 10  | 1 | 0.01471327 | 0.036082553 | [THTPA]               |
| GO:0006412 translation                                                                               | 130 | 2 | 0.01603325 | 0.037532384 | [MRPL35, MRPS7]       |
| GO:0042274 ribosomal small subunit biogenesis                                                        | 11  | 1 | 0.01617283 | 0.035823677 | [NOP14]               |
| GO:0045333 cellular respiration                                                                      | 11  | 1 | 0.01617283 | 0.035823677 | [NDUFS4]              |
| GO:0031663 lipopolysaccharide-mediated signaling pathway                                             | 11  | 1 | 0.01617283 | 0.035823677 | [MTDH]                |
| GO:0032981 mitochondrial respiratory chain complex I assembly                                        | 11  | 1 | 0.01617283 | 0.035823677 | [NDUFS4]              |
| GO:0001516 prostaglandin biosynthetic process                                                        | 12  | 1 | 0.01763025 | 0.036685161 | [PTGES2]              |
| GO:0010033 response to organic substance                                                             | 12  | 1 | 0.01763025 | 0.036685161 | [PPP2CA]              |
| GO:0006446 regulation of translational initiation                                                    | 13  | 1 | 0.01908554 | 0.038545313 | [EIF3E]               |
| GO:0015031 protein transport                                                                         | 383 | 3 | 0.01933365 | 0.038295507 | [CHMP2A, NXT1, TMED7] |
| GO:0006397 mRNA processing                                                                           | 144 | 2 | 0.01942888 | 0.037758004 | [DDX20, DDX47]        |
| GO:0072593 reactive oxygen species metabolic process                                                 | 14  | 1 | 0.02053872 | 0.039175701 | [NDUFS4]              |
| GO:0007049 cell cycle                                                                                | 405 | 3 | 0.02235448 | 0.04186385  | [BECN1, CCAR1, TLK1]  |
| GO:0045595 regulation of cell differentiation                                                        | 16  | 1 | 0.02343871 | 0.04311048  | [PPP2CA]              |
| GO:0006486 protein glycosylation                                                                     | 17  | 1 | 0.02488553 | 0.044968591 | [ALG3]                |
| GO:0030155 regulation of cell adhesion                                                               | 18  | 1 | 0.02633024 | 0.046758881 | [PPP2CA]              |
| GO:0051897 positive regulation of protein kinase B signaling cascade                                 | 20  | 1 | 0.02921335 | 0.050999577 | [MTDH]                |
| GO:0043154 negative regulation of cysteine-type endopeptidase activity involved in apoptotic process | 25  | 1 | 0.03638439 | 0.061943673 | [HSPA5]               |
| GO:0006338 chromatin remodeling                                                                      | 25  | 1 | 0.03638439 | 0.061943673 | [CHRAC1]              |
| GO:0006413 translational initiation                                                                  | 26  | 1 | 0.03781233 | 0.062314715 | [EIF3E]               |

|                                                                             |     |   |            |             |                |
|-----------------------------------------------------------------------------|-----|---|------------|-------------|----------------|
| GO:0008610 lipid biosynthetic process                                       | 26  | 1 | 0.03781233 | 0.062314715 | [ACLY]         |
| GO:0016568 chromatin modification                                           | 221 | 2 | 0.04267313 | 0.06867707  | [DNAJC2, TLK1] |
| GO:0006302 double-strand break repair                                       | 33  | 1 | 0.04774971 | 0.075087336 | [SETX]         |
| GO:0007420 brain development                                                | 33  | 1 | 0.04774971 | 0.075087336 | [NDUFS4]       |
| GO:0045766 positive regulation of angiogenesis                              | 34  | 1 | 0.04916107 | 0.075575967 | [MTDH]         |
| GO:0006986 response to unfolded protein                                     | 35  | 1 | 0.05057036 | 0.07659922  | [HSPA4]        |
| GO:0006470 protein dephosphorylation                                        | 37  | 1 | 0.05338278 | 0.079687334 | [PPP2CA]       |
| GO:0000910 cytokinesis                                                      | 41  | 1 | 0.05898303 | 0.085566927 | [BECN1]        |
| GO:0022900 electron transport chain                                         | 41  | 1 | 0.05898303 | 0.085566927 | [TXN]          |
| GO:0006886 intracellular protein transport                                  | 41  | 1 | 0.05898303 | 0.085566927 | [TLK1]         |
| GO:0006633 fatty acid biosynthetic process                                  | 42  | 1 | 0.06037798 | 0.085190856 | [PTGES2]       |
| GO:0030036 actin cytoskeleton organization                                  | 43  | 1 | 0.06177091 | 0.085978424 | [TNXB]         |
| GO:0008654 phospholipid biosynthetic process                                | 44  | 1 | 0.06316179 | 0.086742198 | [CHKB]         |
| GO:0051092 positive regulation of NF-kappaB transcription factor activity   | 45  | 1 | 0.06455065 | 0.087483122 | [MTDH]         |
| GO:0035556 intracellular signal transduction                                | 48  | 1 | 0.06870507 | 0.091904191 | [TLK1]         |
| GO:0040008 regulation of growth                                             | 51  | 1 | 0.07284133 | 0.096187909 | [PPP2CA]       |
| GO:0007059 chromosome segregation                                           | 55  | 1 | 0.07832821 | 0.102124121 | [RAD21]        |
| GO:0030308 negative regulation of cell growth                               | 58  | 1 | 0.08242238 | 0.106118809 | [PPP2CA]       |
| GO:0007126 meiosis                                                          | 60  | 1 | 0.08514187 | 0.108266818 | [PPP2CA]       |
| GO:0055114 oxidation-reduction process                                      | 65  | 1 | 0.09190592 | 0.115442805 | [TXN]          |
| GO:0006457 protein folding                                                  | 68  | 1 | 0.09594069 | 0.119058934 | [MESDC2]       |
| GO:0006935 chemotaxis                                                       | 71  | 1 | 0.09995781 | 0.12256732  | [CYR61]        |
| GO:0006917 induction of apoptosis                                           | 79  | 1 | 0.11058441 | 0.134002286 | [PPP2CA]       |
| GO:0043065 positive regulation of apoptotic process                         | 83  | 1 | 0.11585129 | 0.138752122 | [DDX20]        |
| GO:0006916 anti-apoptosis                                                   | 84  | 1 | 0.1171632  | 0.138710454 | [HSPA5]        |
| GO:0016055 Wnt receptor signaling pathway                                   | 87  | 1 | 0.12108745 | 0.141727355 | [MESDC2]       |
| GO:0006974 response to DNA damage stimulus                                  | 93  | 1 | 0.12888449 | 0.14915846  | [TLK1]         |
| GO:0000398 nuclear mRNA splicing, via spliceosome                           | 98  | 1 | 0.13532998 | 0.154877638 | [SYNCRIP]      |
| GO:0006950 response to stress                                               | 104 | 1 | 0.14300259 | 0.161860076 | [HSPA4]        |
| GO:0043123 positive regulation of I-kappaB kinase/NF-kappaB cascade         | 105 | 1 | 0.14427483 | 0.161525078 | [MTDH]         |
| GO:0000122 negative regulation of transcription from RNA polymerase II prom | 117 | 1 | 0.15939736 | 0.176536864 | [MTDH]         |
| GO:0008219 cell death                                                       | 136 | 1 | 0.18280488 | 0.200307471 | [SETX]         |
| GO:0006468 protein phosphorylation                                          | 185 | 1 | 0.24025052 | 0.260482147 | [TLK1]         |
| GO:0051301 cell division                                                    | 285 | 1 | 0.34542821 | 0.370615683 | [RAD21]        |
| GO:0044419 interspecies interaction between organisms                       | 315 | 1 | 0.37408641 | 0.397225771 | [SYNCRIP]      |

|                                                                |      |   |            |             |                      |
|----------------------------------------------------------------|------|---|------------|-------------|----------------------|
| GO:0045893 positive regulation of transcription, DNA-dependent | 334  | 1 | 0.39159382 | 0.411573096 | [DNAJC2]             |
| GO:0006355 regulation of transcription, DNA-dependent          | 1254 | 3 | 0.43585304 | 0.453463266 | [CCAR1, PPP2CA, TXN] |
| GO:0007155 cell adhesion                                       | 420  | 1 | 0.46499409 | 0.478943911 | [TNXB]               |
| GO:0006508 proteolysis                                         | 476  | 1 | 0.50802683 | 0.518086763 | [PSMC1]              |
| GO:0008150 biological_process                                  | 588  | 1 | 0.58412208 | 0.589848769 | [TMEM128]            |
| GO:0007275 multicellular organismal development                | 822  | 1 | 1          | 1           | [SPRY1]              |

---

Table S6-1. Module eigengene and its evolutionary rates in six prenatal highly LDE-specific modules (LDE\_blue).

| pig_Genebank   | pig_Gene | LDE<br>Module | k       |          | eigencor |           | mean  |               | Ka/Ks |
|----------------|----------|---------------|---------|----------|----------|-----------|-------|---------------|-------|
|                |          |               | kTotal  | kWithin  | r        | eigenpval | Expr  | LTModule      |       |
| NM_001044529.1 | CAPN10   | blue          | 280.497 | 135.4669 | 0.96413  | 0.0081128 | 20.23 | magenta       | --    |
| NM_001044548.1 | NTN1     | blue          | 297.083 | 140.6561 | 0.97295  | 0.0053183 | 17.35 | darkred       | 0     |
| AK234245.1     | CCDC23   | blue          | 267.942 | 129.7176 | 0.95374  | 0.011862  | 48    | turquoise     | 99    |
| AK234254.1     | AP2S1    | blue          | 308.667 | 151.1919 | 0.98946  | 0.0012964 | 54.51 | turquoise     | 99    |
| AK230890.1     | UBA3     | blue          | 330.278 | 138.118  | 0.96988  | 0.0062458 | 99.04 | turquoise     | --    |
| AK230981.1     | TNFAIP6  | blue          | 308.079 | 145.7172 | 0.9809   | 0.0031593 | 21.86 | yellow        | --    |
| AK240575.1     | C11orf58 | blue          | 320.719 | 147.6085 | 0.98383  | 0.0024632 | 58.49 | navy          | 99    |
| AK240580.1     | RCHY1    | blue          | 343.356 | 145.0638 | 0.97938  | 0.0035429 | 13.96 | blue          | 99    |
| AK231033.1     | MAPKSP1  | blue          | 326.343 | 113.4681 | 0.92358  | 0.0250674 | 22.61 | darkred       | 0     |
| AK234825.1     | SPCS2    | blue          | 343.685 | 152.1234 | 0.99081  | 0.0010568 | 38.48 | blue          | 0     |
| AK235171.1     | DDAH2    | blue          | 221.799 | 100.9559 | 0.89788  | 0.0385701 | 43.53 | turquoise     | --    |
| AK238491.1     | PPP1R1B  | blue          | 243.547 | 117.3866 | 0.93195  | 0.0210901 | 5.426 | turquoise     | 99    |
| AK235662.1     | RAB23    | blue          | 319.808 | 146.6854 | 0.98195  | 0.0029033 | 18.62 | yellow        | --    |
| AK238657.1     | FO XK2   | blue          | 321.142 | 151.1261 | 0.98937  | 0.0013144 | 28.95 | white         | --    |
| AK235782.1     | RABAC1   | blue          | 349.715 | 140.8495 | 0.97324  | 0.0052335 | 85.13 | turquoise     | --    |
| AK238784.1     | DNAJB6   | blue          | 236.637 | 103.4066 | 0.90389  | 0.0352451 | 12.99 | turquoise     | 99    |
| AK239167.1     | THAP3    | blue          | 338.091 | 150.7948 | 0.98837  | 0.0015034 | 7.646 | blue          | 99    |
| AK239234.1     | TPRG1L   | blue          | 224.773 | 106.8526 | 0.91093  | 0.031479  | 14.56 | blue          | 99    |
| AK230559.1     | PICALM   | blue          | 301.813 | 132.3918 | 0.9594   | 0.0097589 | 120.3 | turquoise     | 99    |
| AK236416.1     | TYMS     | blue          | 254.927 | 122.3157 | 0.94112  | 0.0169966 | 57.48 | green         | --    |
| AK239611.1     | HNRPDL   | blue          | 318.649 | 107.5245 | 0.91147  | 0.0311998 | 159.9 | blue          | --    |
| AK236676.1     | TGFB2    | blue          | 332.113 | 99.89093 | 0.89508  | 0.040147  | 21.6  | blue          | 99    |
| AK239756.1     | TERF2IP  | blue          | 287.172 | 141.1846 | 0.97324  | 0.005234  | 89.18 | lightgreen    | 0     |
| AK239935.1     | NUTF2    | blue          | 328.478 | 150.9149 | 0.9889   | 0.0014023 | 36.94 | blue          | 0     |
| AK233427.1     | RTN3     | blue          | 188.623 | 83.2891  | 0.85607  | 0.0641123 | 24.14 | turquoise     | 99    |
| AK233469.1     | AARSD1   | blue          | 296.166 | 146.4449 | 0.98216  | 0.0028537 | 19.05 | blue          | --    |
| AK237149.1     | NCAPG2   | blue          | 314.411 | 123.7218 | 0.9433   | 0.0160705 | 11.88 | turquoise     | --    |
| AK233574.1     | SPATS2L  | blue          | 214.099 | 93.60382 | 0.8807   | 0.0485686 | 98.26 | pink          | 0     |
| AK233803.1     | RNASEH2C | blue          | 310.38  | 144.9235 | 0.98006  | 0.0033711 | 41.64 | turquoise     | 99    |
| AK234140.1     | EIF4E2   | blue          | 331.211 | 105.4832 | 0.90744  | 0.0333301 | 24.8  | violet        | --    |
| AB292846.1     | NME1-NME | blue          | 344.419 | 114.7129 | 0.92573  | 0.0240248 | 28.85 | turquoise     | --    |
| AJ416019.1     | FABP3    | blue          | 325.715 | 144.4368 | 0.97843  | 0.0037918 | 27.3  | darkturquoise | 99    |
| NM_001123122.1 | H2AFZ    | blue          | 322.071 | 125.8388 | 0.94674  | 0.0146351 | 105.1 | turquoise     | 99    |
| XM_001927037.1 | RRAGA    | blue          | 301.63  | 146.4925 | 0.98203  | 0.0028832 | 65    | turquoise     | 99    |
| XM_001924578.1 | CHST14   | blue          | 330.676 | 145.5987 | 0.98125  | 0.0030726 | 57.34 | turquoise     | 0     |
| XM_001928960.1 | PEA15    | blue          | 323.343 | 151.5247 | 0.98964  | 0.0012637 | 106.9 | turquoise     | 99    |
| XM_001928648.1 | KIAA0907 | blue          | 326.947 | 142.8341 | 0.97724  | 0.004108  | 26.67 | pink          | 0     |
| XM_001929572.1 | C1orf77  | blue          | 340.871 | 135.4556 | 0.96544  | 0.0076728 | 17.21 | yellow        | 0     |
| XM_001929641.1 | PSMB4    | blue          | 308.423 | 150.2932 | 0.98807  | 0.0015613 | 75.73 | blue          | 0     |
| XM_001927218.1 | KRT4     | blue          | 209.505 | 73.97136 | 0.83017  | 0.0818405 | 2.41  | salmon        | 0.074 |
| XM_001929413.1 | PTGES3   | blue          | 235.989 | 94.16578 | 0.88202  | 0.0477763 | 63.24 | darkmagenta   | 99    |
| XM_001925133.1 | ACIN1    | blue          | 345.976 | 149.2027 | 0.98579  | 0.0020283 | 66.9  | yellowgreen   | 0.461 |
| XM_001926121.1 | MRPL52   | blue          | 331.809 | 145.3388 | 0.97994  | 0.0034006 | 22.85 | darkturquoise | --    |
| XM_001926913.1 | POLR1D   | blue          | 345.111 | 146.6876 | 0.98223  | 0.002836  | 81.41 | darkred       | 0     |

|                |           |      |         |          |         |           |       |              |       |
|----------------|-----------|------|---------|----------|---------|-----------|-------|--------------|-------|
| XM_001926988.1 | POLR1D    | blue | 267.851 | 125.894  | 0.94797 | 0.0141336 | 25.01 | blue         | 0     |
| XM_001924615.1 | PDLIM1    | blue | 278.429 | 115.0891 | 0.92797 | 0.0229525 | 24.78 | grey         | 0     |
| XM_001925382.1 | MRPL43    | blue | 322.59  | 130.1057 | 0.9556  | 0.0111557 | 23.18 | darkred      | --    |
| XM_001928772.1 | DDX21     | blue | 339.685 | 141.6328 | 0.97386 | 0.0050539 | 126.1 | midnightblue | 0.132 |
| XM_001924660.1 | C10orf72  | blue | 284.507 | 134.4953 | 0.96252 | 0.0086614 | 53.8  | turquoise    | 0     |
| XM_001924736.1 | C10orf104 | blue | 283.923 | 140.7768 | 0.97264 | 0.0054105 | 81.02 | white        | 0     |
| XM_001925978.1 | EWSR1     | blue | 274.99  | 127.6404 | 0.95132 | 0.0127982 | 52.77 | turquoise    | --    |
| XM_001924074.1 | HSBP1     | blue | 339.963 | 155.8771 | 0.99605 | 0.0002982 | 88.76 | blue         | --    |
| XM_001928335.1 | TUBA4A    | blue | 310.232 | 131.4381 | 0.9569  | 0.0106708 | 32.06 | red          | 0     |
| XM_001927332.1 | AGA       | blue | 270.558 | 122.7094 | 0.94143 | 0.0168637 | 11.31 | blue         | 0.413 |
| XM_001927451.1 |           | blue | 240.137 | 108.7466 | 0.91518 | 0.0292713 | 8.412 | skyblue      | 0     |
| NM_214144.1    | PRDX5     | blue | 278.414 | 137.3509 | 0.96689 | 0.0071964 | 69.4  | turquoise    | 0     |
| NM_214309.1    | NUDT2     | blue | 307.642 | 151.3094 | 0.98956 | 0.0012783 | 33.84 | lightcyan    | 0.395 |
| NM_001001539.1 | AKR1B1    | blue | 332.87  | 126.6476 | 0.94817 | 0.0140532 | 94.88 | yellow       | 0     |
| AY609657.1     | PPID      | blue | 303.112 | 150.6835 | 0.98846 | 0.0014862 | 25.11 | navy         | 99    |
| AY609726.1     | ARF6      | blue | 326.049 | 138.8151 | 0.96958 | 0.0063408 | 10.13 | navy         | 0     |
| AY609827.1     | HSPBP1    | blue | 311.192 | 133.7068 | 0.96249 | 0.0086728 | 13.93 | turquoise    | 99    |
| AY610021.1     | SNRPD1    | blue | 281.297 | 131.3991 | 0.9575  | 0.0104516 | 54.35 | magenta      | 0     |
| AY610024.1     | PGP       | blue | 276.815 | 116.5524 | 0.92967 | 0.0221496 | 11.88 | tan          | 99    |
| NM_213748.1    | TNNT1     | blue | 332.665 | 137.172  | 0.96777 | 0.0069134 | 1382  | sienna3      | 99    |
| NM_001012406.1 | MYOG      | blue | 314.885 | 141.8359 | 0.97492 | 0.0047504 | 14.59 | blue         | 99    |
| CF178259       |           | blue | 270.797 | 132.2562 | 0.95891 | 0.0099374 | 57.22 | lightgreen   | --    |
| CF360790       |           | blue | 325.482 | 132.504  | 0.95928 | 0.0098037 | 6.828 | midnightblue | --    |
| CF364773       |           | blue | 286.516 | 141.4599 | 0.97449 | 0.0048717 | 8.364 | blue         | --    |
| BX667513       |           | blue | 301.207 | 150.2633 | 0.98769 | 0.0016362 | 51.88 | turquoise    | --    |
| BX666658       |           | blue | 340.92  | 140.0014 | 0.97123 | 0.0058333 | 4.58  | blue         | --    |
| BX666730       |           | blue | 253.182 | 118.4767 | 0.93429 | 0.0200195 | 32.11 | blue         | --    |
| BX668263       |           | blue | 343.94  | 122.1753 | 0.9405  | 0.0172678 | 21.8  | lightyellow  | --    |
| BX669236       |           | blue | 307.339 | 145.7387 | 0.98108 | 0.0031161 | 23.45 | lightyellow  | --    |
| BX672167       |           | blue | 274.263 | 133.093  | 0.95963 | 0.0096791 | 11.86 | violet       | --    |
| BX674271       |           | blue | 298.124 | 133.4459 | 0.9618  | 0.0089104 | 53.28 | white        | --    |
| BX675385       |           | blue | 340.049 | 157.4072 | 0.99837 | 7.88E-05  | 5.376 | darkred      | --    |
| BP158662       |           | blue | 273.009 | 133.0443 | 0.96007 | 0.0095189 | 26.13 | navy         | 0.085 |
| BP433436       |           | blue | 260.207 | 128.7692 | 0.9526  | 0.0122996 | 135.2 | turquoise    | --    |
| BP142915       |           | blue | 260.457 | 118.7093 | 0.93596 | 0.0192654 | 19.98 | turquoise    | --    |
| BP463816       |           | blue | 352.591 | 143.6254 | 0.97731 | 0.0040895 | 30.79 | turquoise    | 0.163 |
| CK449659       |           | blue | 258.23  | 117.5698 | 0.93366 | 0.0203041 | 17.99 | turquoise    | --    |
| CK450104       |           | blue | 287.676 | 143.1703 | 0.97644 | 0.0043256 | 22.77 | blue         | --    |
| CK451664       |           | blue | 257.159 | 116.625  | 0.93234 | 0.0209116 | 71.43 | darkred      | --    |
| CK452762       |           | blue | 327.502 | 156.252  | 0.99678 | 0.0002195 | 38.73 | blue         | --    |
| CK459703       |           | blue | 329.771 | 154.0763 | 0.9936  | 0.0006144 | 27.86 | white        | --    |
| CK460762       |           | blue | 293.62  | 125.445  | 0.94625 | 0.0148378 | 22.32 | turquoise    | --    |
| CK461229       |           | blue | 335.523 | 145.5552 | 0.98039 | 0.0032862 | 54.08 | magenta      | --    |
| BX914521       |           | blue | 293.867 | 133.9085 | 0.96228 | 0.0087458 | 14.8  | blue         | 99    |
| BX915597       |           | blue | 248.704 | 118.9629 | 0.93405 | 0.02013   | 13.35 | lightcyan    | 99    |
| BX916011       |           | blue | 315.422 | 142.9286 | 0.97657 | 0.0042909 | 64.29 | turquoise    | --    |
| BX917211       |           | blue | 311.929 | 148.6979 | 0.98586 | 0.0020136 | 46.51 | blue         | --    |
| BX919071       |           | blue | 239.629 | 109.7798 | 0.9164  | 0.0286491 | 36.14 | tan          | --    |

|          |      |         |          |         |           |       |             |    |
|----------|------|---------|----------|---------|-----------|-------|-------------|----|
| BX919211 | blue | 329.794 | 155.2244 | 0.99524 | 0.0003934 | 15.08 | lightgreen  | -- |
| BX920888 | blue | 292.433 | 110.3281 | 0.9171  | 0.0282962 | 31.72 | turquoise   | -- |
| BX922414 | blue | 325.243 | 153.0529 | 0.99202 | 0.000855  | 11.77 | blue        | -- |
| BX922807 | blue | 301.222 | 134.3475 | 0.96331 | 0.0083892 | 10.58 | orange      | -- |
| BX923265 | blue | 318.137 | 145.0549 | 0.97987 | 0.0034188 | 8.062 | navy        | -- |
| BX924131 | blue | 337.634 | 146.1673 | 0.98129 | 0.0030625 | 15.04 | turquoise   | -- |
| BX924576 | blue | 321.911 | 139.0942 | 0.97038 | 0.0060908 | 18.27 | magenta     | -- |
| CN154367 | blue | 308.411 | 148.4219 | 0.98487 | 0.0022279 | 4.618 | blue        | -- |
| CN156524 | blue | 297.145 | 140.6479 | 0.97309 | 0.0052784 | 15.48 | brown       | -- |
| CN156601 | blue | 331.756 | 157.6964 | 0.99886 | 4.59E-05  | 53.67 | violet      | -- |
| CN156870 | blue | 326.613 | 154.4969 | 0.99404 | 0.0005517 | 55.41 | turquoise   | -- |
| CN157291 | blue | 341.716 | 133.9114 | 0.96134 | 0.0090708 | 12.83 | turquoise   | -- |
| CN158157 | blue | 347.714 | 149.9549 | 0.98747 | 0.0016805 | 174.1 | darkgreen   | -- |
| CN158745 | blue | 340.543 | 154.9054 | 0.99489 | 0.0004382 | 192   | blue        | -- |
| CN158757 | blue | 205.698 | 89.77913 | 0.8729  | 0.0533456 | 2.486 | lightyellow | -- |
| CO992371 | blue | 341.333 | 150.5814 | 0.98824 | 0.0015273 | 33.18 | turquoise   | -- |
| CJ009488 | blue | 300.466 | 140.0243 | 0.97269 | 0.0053941 | 2.868 | tan         | -- |
| CJ009624 | blue | 314.634 | 117.3299 | 0.93091 | 0.0215735 | 8.656 | blue        | -- |
| CJ011598 | blue | 329.757 | 135.1172 | 0.96307 | 0.0084731 | 11.81 | turquoise   | -- |
| CJ022587 | blue | 236.523 | 108.3223 | 0.9137  | 0.0300343 | 66.4  | blue        | -- |
| DN100786 | blue | 332.969 | 151.6703 | 0.98991 | 0.0012144 | 12.63 | turquoise   | -- |
| DN101634 | blue | 345.595 | 150.953  | 0.98887 | 0.0014064 | 46.72 | blue        | -- |
| DN102168 | blue | 290.774 | 133.0497 | 0.96158 | 0.0089877 | 100.8 | orange      | -- |
| DN106372 | blue | 305.446 | 129.6726 | 0.95498 | 0.0113874 | 17.37 | turquoise   | -- |
| DN106398 | blue | 352.367 | 131.4102 | 0.95675 | 0.010728  | 37.58 | turquoise   | -- |
| DN107111 | blue | 300.643 | 142.8556 | 0.97629 | 0.0043676 | 15.61 | blue        | -- |
| DN109035 | blue | 341.792 | 141.7273 | 0.97484 | 0.0047717 | 82.27 | blue        | -- |
| DN109946 | blue | 300.083 | 144.3081 | 0.97857 | 0.0037524 | 8.882 | blue        | -- |
| DN112403 | blue | 315.849 | 131.1941 | 0.95672 | 0.0107396 | 25.29 | blue        | 0  |
| DN117304 | blue | 287.422 | 133.7347 | 0.96223 | 0.0087615 | 10.76 | navy        | -- |
| DN120090 | blue | 318.367 | 146.5824 | 0.98217 | 0.0028505 | 18.91 | darkred     | -- |
| DN121729 | blue | 306.529 | 126.5726 | 0.95048 | 0.0131285 | 9.292 | red         | -- |
| DN124126 | blue | 300.142 | 137.4762 | 0.9679  | 0.0068699 | 37.05 | blue        | -- |
| DN124198 | blue | 241.199 | 110.5873 | 0.91885 | 0.0274091 | 44.59 | violet      | -- |
| DN125831 | blue | 271.627 | 113.047  | 0.92361 | 0.0250503 | 168.7 | salmon      | -- |
| DN126201 | blue | 304.934 | 151.705  | 0.98991 | 0.0012147 | 90.63 | lightgreen  | -- |
| BW957936 | blue | 266.575 | 114.3659 | 0.92629 | 0.0237554 | 2.774 | blue        | 99 |
| BW981299 | blue | 257.726 | 125.9921 | 0.9476  | 0.0142872 | 20.82 | turquoise   | -- |
| AJ954193 | blue | 306.497 | 143.4441 | 0.97754 | 0.0040263 | 20.79 | turquoise   | -- |
| AJ956714 | blue | 155.165 | 68.95951 | 0.81583 | 0.0922086 | 32.99 | turquoise   | -- |
| AJ958305 | blue | 280.657 | 136.2701 | 0.96588 | 0.0075262 | 15.11 | turquoise   | -- |
| AJ959876 | blue | 308.596 | 142.4706 | 0.97643 | 0.0043275 | 2.25  | grey        | -- |
| AJ944988 | blue | 311.494 | 143.9463 | 0.97792 | 0.0039242 | 7.596 | blue        | -- |
| DV227720 | blue | 271.512 | 130.1132 | 0.95509 | 0.0113465 | 18.72 | turquoise   | -- |
| DV229300 | blue | 326.727 | 137.2064 | 0.96657 | 0.0073017 | 7.908 | lightyellow | -- |
| DV899239 | blue | 307.179 | 137.0201 | 0.96785 | 0.0068869 | 10.59 | brown       | -- |
| DV902328 | blue | 286.487 | 131.7763 | 0.95862 | 0.0100409 | 2.074 | orange      | -- |
| DR120938 | blue | 318.497 | 155.8417 | 0.99607 | 0.000296  | 28.78 | darkred     | -- |

|          |       |      |         |          |         |           |       |               |    |       |
|----------|-------|------|---------|----------|---------|-----------|-------|---------------|----|-------|
| CV876076 |       | blue | 348.545 | 149.7934 | 0.98676 | 0.0018247 | 3.164 | magenta       | -- |       |
| DY405629 |       | blue | 257.222 | 123.6141 | 0.94283 | 0.0162657 | 2.456 | lightcyan     | -- |       |
| DY410479 |       | blue | 330.781 | 157.8598 | 0.99907 | 3.41E-05  | 30.84 | pink          | -- |       |
| DY428559 |       | blue | 307.567 | 142.1329 | 0.97521 | 0.004667  | 9.29  | magenta       | -- |       |
| DY437892 |       | blue | 332.949 | 150.9344 | 0.9888  | 0.0014198 | 9.516 | turquoise     | -- |       |
| DY437999 |       | blue | 340.269 | 143.9776 | 0.97762 | 0.0040047 | 7.656 | brown         | -- |       |
| EB684343 |       | blue | 352.518 | 128.945  | 0.95251 | 0.0123363 | 83.21 | darkred       | -- |       |
| DB812814 |       | blue | 216.443 | 95.52792 | 0.88571 | 0.0455796 | 57.31 | turquoise     | -- |       |
| DB786707 |       | blue | 312.65  | 140.9349 | 0.97347 | 0.0051654 | 11.5  | darkred       | -- |       |
| AK236389 | EPHX1 | blue | 339.052 | 150.6831 | 0.98839 | 0.0014999 | 13.33 | darkred       | -- | 0.192 |
| AK232389 | CTSB  | blue | 317.11  | 150.0496 | 0.98779 | 0.0016173 | 19.67 | blue          | -- | 0     |
| ES446945 |       | blue | 249.649 | 104.0821 | 0.90455 | 0.0348888 | 7.082 | turquoise     | -- |       |
| ES446999 |       | blue | 269.991 | 130.7782 | 0.95642 | 0.0108486 | 22.48 | blue          | -- |       |
| ES447481 |       | blue | 207.293 | 86.13472 | 0.86298 | 0.0596174 | 50.81 | turquoise     | -- |       |
| EV984595 |       | blue | 343.733 | 150.4633 | 0.98821 | 0.0015334 | 170.7 | turquoise     | -- |       |
| EW074840 |       | blue | 322.539 | 156.754  | 0.9975  | 0.0001501 | 9.574 | blue          | -- |       |
| EW085190 |       | blue | 339.64  | 154.5347 | 0.99437 | 0.0005065 | 10.9  | magenta       | -- |       |
| EW087471 |       | blue | 315.855 | 153.2879 | 0.99244 | 0.0007877 | 7.464 | blue          | -- |       |
| EW154385 |       | blue | 279.747 | 138.8962 | 0.97013 | 0.006169  | 22.85 | violet        | -- |       |
| EW172087 |       | blue | 325.226 | 133.0039 | 0.96163 | 0.0089694 | 12.27 | darkturquoise | -- |       |
| EW177532 |       | blue | 284.244 | 141.7259 | 0.97444 | 0.0048863 | 7.248 | turquoise     | -- |       |
| EW188932 |       | blue | 311.149 | 151.7868 | 0.99024 | 0.0011563 | 19.25 | blue          | -- |       |
| EW194624 |       | blue | 328.226 | 156.6312 | 0.99735 | 0.0001639 | 4.446 | darkturquoise | -- |       |
| EW212556 |       | blue | 262.951 | 119.7422 | 0.93697 | 0.018813  | 21.33 | blue          | -- |       |
| EW238451 |       | blue | 345.904 | 140.0062 | 0.97243 | 0.0054739 | 27.8  | turquoise     | -- |       |
| EW244903 |       | blue | 318.4   | 155.3584 | 0.99547 | 0.0003656 | 15.31 | blue          | -- |       |
| EW249649 |       | blue | 299.504 | 142.6089 | 0.97617 | 0.0043988 | 7.128 | turquoise     | -- |       |
| EW281140 |       | blue | 300.666 | 131.3314 | 0.95669 | 0.0107505 | 753.8 | darkred       | -- |       |
| EW290234 |       | blue | 337.225 | 139.161  | 0.97118 | 0.0058465 | 161.3 | turquoise     | -- |       |
| EW291794 |       | blue | 314.102 | 145.0407 | 0.97992 | 0.0034049 | 29.41 | yellow        | -- |       |
| EW299345 |       | blue | 290.048 | 144.8304 | 0.97931 | 0.0035626 | 22.92 | lightyellow   | -- |       |
| EW301848 |       | blue | 337.612 | 124.7086 | 0.94725 | 0.0144262 | 81.84 | turquoise     | -- |       |
| EW385918 |       | blue | 346.586 | 114.7421 | 0.92624 | 0.0237786 | 12.25 | turquoise     | -- |       |
| EW407282 |       | blue | 312.696 | 146.0845 | 0.98161 | 0.002985  | 28.04 | blue          | -- |       |
| EW410373 |       | blue | 336.956 | 120.4213 | 0.93676 | 0.0189069 | 32.22 | darkturquoise | -- |       |
| EW429561 |       | blue | 272.441 | 131.5127 | 0.95689 | 0.0106759 | 58.8  | turquoise     | -- |       |
| EW501346 |       | blue | 271.268 | 110.7609 | 0.9183  | 0.0276882 | 50.39 | darkgreen     | -- |       |
| EW511183 |       | blue | 346.031 | 125.8745 | 0.94702 | 0.0145207 | 6.818 | yellow        | -- |       |
| EW525048 |       | blue | 326.162 | 147.5469 | 0.98378 | 0.0024727 | 8.286 | lightgreen    | -- |       |
| EW528311 |       | blue | 330.778 | 135.3827 | 0.96403 | 0.0081466 | 16.15 | midnightblue  | -- |       |
| EW568747 |       | blue | 288.949 | 139.2027 | 0.97052 | 0.0060502 | 60.25 | turquoise     | -- |       |
| EW569367 |       | blue | 280.308 | 140.0472 | 0.97173 | 0.0056829 | 7.862 | magenta       | -- |       |
| EW570939 |       | blue | 201.074 | 88.29748 | 0.86829 | 0.0562336 | 209.3 | turquoise     | -- |       |
| EW581399 |       | blue | 302.552 | 118.9631 | 0.93422 | 0.0200517 | 3.638 | red           | -- |       |
| EW588718 |       | blue | 325.05  | 148.7798 | 0.98582 | 0.0020219 | 29.97 | yellow        | -- | 0     |
| EW603701 |       | blue | 318.981 | 139.7935 | 0.97156 | 0.0057338 | 7.144 | blue          | -- |       |
| EW664676 |       | blue | 260.438 | 125.7814 | 0.94712 | 0.0144822 | 16.19 | blue          | -- |       |
| EW675014 |       | blue | 244.129 | 112.5156 | 0.9226  | 0.0255489 | 665.2 | skyblue       | -- |       |



|          |      |         |          |         |           |       |           |    |
|----------|------|---------|----------|---------|-----------|-------|-----------|----|
| AW231897 | blue | 202.012 | 75.56107 | 0.83393 | 0.0791859 | 12.67 | turquoise | -- |
| BE014011 | blue | 286.858 | 123.3537 | 0.94269 | 0.0163256 | 6.196 | magenta   | -- |
| BE233131 | blue | 274.993 | 113.6182 | 0.92497 | 0.0243921 | 14.36 | yellow    | -- |
| BE233738 | blue | 305.019 | 148.6656 | 0.98544 | 0.0021052 | 27.49 | magenta   | -- |
| BF703133 | blue | 344.896 | 135.1057 | 0.96461 | 0.007948  | 11.39 | brown     | -- |
| BQ604210 | blue | 278.173 | 136.2975 | 0.96542 | 0.0076786 | 41.13 | turquoise | -- |

---

Table S6-2. Module eigengene and its evolutionary rates in six prenatal highly LDE-specific modules (LDE\_midnightblue).

| pig_Genebank   | pig_Gene | LDEModule    | kTotal  | kWithin   | eigen |           | meanE  |             | Ka/Ks |
|----------------|----------|--------------|---------|-----------|-------|-----------|--------|-------------|-------|
|                |          |              |         |           | corr  | eigenpval | xpr    | LTModule    |       |
| XM_001925341.1 | ASB2     | midnightblue | 226.629 | 36.619494 | 1     | 0.000228  | 12.226 | white       | 0     |
| XM_001926116.1 | ASPH     | midnightblue | 258.652 | 33.5788   | 0.98  | 0.003922  | 49.27  | white       | --    |
| XM_001929000.1 | BAG3     | midnightblue | 253.613 | 32.80669  | 0.97  | 0.005177  | 51.128 | white       | 0.152 |
| XM_001927918.1 | CASQ2    | midnightblue | 202.833 | 34.726675 | 0.99  | 0.00207   | 18.838 | darkorange  | 0.065 |
| AK235923.1     | COQ9     | midnightblue | 244.291 | 36.81882  | 1     | 0.000128  | 57.084 | brown       | 0     |
| AY610225.1     | COX7B    | midnightblue | 229.005 | 34.958883 | 0.99  | 0.001693  | 24.796 | turquoise   | 99    |
| NM_001048187.1 | DLK1     | midnightblue | 244.763 | 36.201023 | 0.99  | 0.0005    | 6.374  | brown       | --    |
| AK234424.1     | DUSP26   | midnightblue | 219.047 | 36.575409 | 1     | 0.000253  | 63.068 | greenyellow | 0     |
| AY609402.1     | EIF1AY   | midnightblue | 282.17  | 28.201445 | 0.94  | 0.017226  | 23.018 | brown       | --    |
| AK232843.1     | GPD1     | midnightblue | 164.045 | 28.786626 | 0.95  | 0.014776  | 3.086  | purple      | 0     |
| AK232127.1     | MLF1     | midnightblue | 223.54  | 32.394577 | 0.97  | 0.005761  | 24.136 | greenyellow | 0     |
| NM_214374.2    | MYL1     | midnightblue | 192.446 | 33.507286 | 0.98  | 0.003923  | 102.71 | brown       | --    |
| AK231783.1     | PDLIM3   | midnightblue | 209.632 | 32.248573 | 0.97  | 0.005938  | 68.094 | purple      | 0     |
| NM_001099932.1 | PGK1     | midnightblue | 153.916 | 27.806131 | 0.94  | 0.018236  | 324.41 | royalblue   | 0     |
| NM_214213.1    | PLN      | midnightblue | 223.006 | 36.446624 | 1     | 0.000326  | 9.668  | purple      | --    |
| XM_001926917.1 | PLXND1   | midnightblue | 193.887 | 33.7288   | 0.98  | 0.003588  | 108.79 | purple      | 0.03  |
| AK236976.1     | PPP1R3B  | midnightblue | 264.717 | 30.850524 | 0.96  | 0.009563  | 16.28  | purple      | 0.087 |
| AK237414.1     | PTP4A3   | midnightblue | 229.841 | 36.508053 | 1     | 0.000275  | 101.38 | purple      | --    |
| X95846.1       | RYR3     | midnightblue | 215.051 | 36.23146  | 0.99  | 0.000501  | 5.86   | white       | --    |
| AK233419.1     | SLC25A4  | midnightblue | 251.573 | 35.606469 | 0.99  | 0.001052  | 232.88 | purple      | 0     |
| AK233342.1     | SLC6A12  | midnightblue | 203.247 | 33.49299  | 0.98  | 0.003918  | 6.814  | purple      | 0     |
| XM_001928874.1 | SNTA1    | midnightblue | 236.144 | 34.870391 | 0.99  | 0.00189   | 12.122 | purple      | 0     |
| AK238056.1     |          | midnightblue | 240.157 | 37.116479 | 1     | 1.32E-05  | 19.294 | purple      | --    |
| BX666448       |          | midnightblue | 251.825 | 36.191731 | 0.99  | 0.000545  | 524.67 | red         | --    |
| BX666997       |          | midnightblue | 269.139 | 34.156695 | 0.98  | 0.003028  | 54.326 | greenyellow | --    |
| CK453765       |          | midnightblue | 226.423 | 36.768213 | 1     | 0.000143  | 31.66  | turquoise   | --    |
| CN162187       |          | midnightblue | 224.594 | 35.259588 | 0.99  | 0.001417  | 27.744 | purple      | 0     |
| CJ014614       |          | midnightblue | 209.59  | 32.30199  | 0.97  | 0.005847  | 9.656  | yellowgreen | --    |
| DN101101       |          | midnightblue | 235.448 | 34.82037  | 0.99  | 0.001861  | 4.228  | brown       | --    |
| DQ000205       |          | midnightblue | 249.938 | 36.431547 | 1     | 0.000357  | 5.794  | navy        | --    |
| DY405382       |          | midnightblue | 228.855 | 35.096389 | 0.99  | 0.001617  | 112.3  | purple      | 0     |
| DB805355       |          | midnightblue | 249.305 | 36.531184 | 1     | 0.000288  | 14.2   | purple      | 0     |
| EV869069       |          | midnightblue | 232.442 | 36.227108 | 0.99  | 0.000503  | 87.732 | greenyellow | --    |
| EV983935       |          | midnightblue | 186.883 | 31.011915 | 0.96  | 0.008546  | 35.706 | black       | 99    |
| EW362700       |          | midnightblue | 260.679 | 32.420281 | 0.97  | 0.00592   | 93.876 | purple      | --    |
| EW367525       |          | midnightblue | 267.434 | 29.922137 | 0.95  | 0.012045  | 69.936 | greenyellow | --    |
| EW472347       |          | midnightblue | 264.752 | 34.026331 | 0.98  | 0.003175  | 214.67 | brown       | --    |
| EW569850       |          | midnightblue | 192.068 | 33.899298 | 0.98  | 0.003321  | 4.588  | turquoise   | 99    |
| EW590143       |          | midnightblue | 206.927 | 34.04328  | 0.98  | 0.002898  | 132.25 | navy        | 99    |
| EW595007       |          | midnightblue | 245.1   | 36.625046 | 1     | 0.00022   | 29.784 | darkgreen   | --    |
| EW621997       |          | midnightblue | 149.731 | 27.038637 | 0.93  | 0.020894  | 28.236 | navy        | --    |
| BI182553       |          | midnightblue | 235.401 | 35.415038 | 0.99  | 0.001257  | 30.484 | white       | --    |

Table S6-3. Module eigengene and its evolutionary rates in six prenatal highly LDE-specific modules (LDE\_only\_turquoise).

| pig_Genebank   | pig_Gene | LDE       | kTotal   | kWithin     | eigencorr | eigenpval | meanExpr | Ka/Ks  |
|----------------|----------|-----------|----------|-------------|-----------|-----------|----------|--------|
|                |          | Module    |          |             |           |           |          |        |
| AK230970.1     | TAX1BP1  | turquoise | 1427.613 | 1427.123445 | 0.9748765 | 0.0047622 | 22.304   | 0      |
| AK234734.1     | PDCD6IP  | turquoise | 1555.892 | 1555.448701 | 0.9972045 | 0.0001774 | 99.81    | 0.2083 |
| AK239273.1     | TMEM106C | turquoise | 1398.026 | 1397.511331 | 0.9727305 | 0.0053835 | 37.442   | 99     |
| AK232798.1     | FERMT2   | turquoise | 1440.917 | 1440.438605 | 0.9761009 | 0.0044192 | 7.156    | --     |
| AK237060.1     | HNRNPC   | turquoise | 58.80791 | 22.08050441 | 0.1072513 | 0.8637057 | 15.64    | --     |
| AK237199.1     | ATG4C    | turquoise | 145.959  | 45.99747442 | 0.1201419 | 0.8473993 | 3.008    | --     |
| NM_001097478.1 | RPL14    | turquoise | 744.9099 | 740.8437241 | 0.8215075 | 0.0880603 | 526.736  | --     |
| NM_001122994.1 | OAZ1     | turquoise | 1570.161 | 1569.767161 | 0.9995428 | 1.17E-05  | 69.454   | 99     |
| X15073.1       | ATP2A2   | turquoise | 1545.012 | 1544.626916 | 0.9952284 | 0.0003954 | 16.296   | 99     |
| XM_001927571.1 | PSIP1    | turquoise | 1094.761 | 1092.758528 | 0.9155102 | 0.0291044 | 98.244   | 0      |
| XM_001926689.1 | FAM189B  | turquoise | 1556.876 | 1556.468304 | 0.9968311 | 0.000214  | 1.79     | 99     |
| XM_001924386.1 | RARG     | turquoise | 1512.314 | 1511.93024  | 0.9898898 | 0.0012185 | 4.304    | 99     |
| XM_001928732.1 | ETF A    | turquoise | 948.9302 | 947.4394731 | 0.8822176 | 0.0476572 | 65.554   | 0.1286 |
| XM_001924270.1 | MAP4     | turquoise | 1516.785 | 1516.414475 | 0.9904094 | 0.0011258 | 7.634    | --     |
| XM_001924322.1 | CHRNA1   | turquoise | 1340.321 | 1339.43201  | 0.9641764 | 0.0080955 | 19.902   | 0      |
| XM_001924519.1 | SRPX2    | turquoise | 291.5491 | 269.8480856 | 0.5719635 | 0.313681  | 20.188   | 0      |
| AY610221.1     | LRRC39   | turquoise | 561.853  | 556.5224047 | 0.769481  | 0.1281668 | 5.638    | 0      |
| AY610266.1     | FIS1     | turquoise | 1300.01  | 1299.296823 | 0.9500702 | 0.0132921 | 23.414   | --     |
| CF787005       |          | turquoise | 1015.585 | 1014.312342 | 0.8903647 | 0.0428534 | 5.582    | --     |
| BX673255       |          | turquoise | 1570.404 | 1570.019856 | 0.9994487 | 1.55E-05  | 1.596    | --     |
| BX674220       |          | turquoise | 1550.915 | 1550.517176 | 0.9968036 | 0.0002168 | 1.888    | --     |
| BP438382       |          | turquoise | 1530.25  | 1529.844444 | 0.9928751 | 0.0007212 | 2.484    | 0      |
| BP464871       |          | turquoise | 1539.886 | 1539.518314 | 0.9939764 | 0.0005607 | 6.89     | --     |
| CN155806       |          | turquoise | 1119.332 | 1118.227009 | 0.9258588 | 0.0239626 | 6.44     | --     |
| CN157667       |          | turquoise | 1383.542 | 1383.043229 | 0.9669938 | 0.0071625 | 8.498    | --     |
| CN158497       |          | turquoise | 1542.276 | 1541.906429 | 0.9941934 | 0.0005307 | 4.824    | --     |
| CN164041       |          | turquoise | 1553.556 | 1553.182884 | 0.9965278 | 0.0002455 | 3.07     | 99     |
| CO988234       |          | turquoise | 1517.708 | 1517.33643  | 0.9902104 | 0.001161  | 4.914    | --     |
| CJ015366       |          | turquoise | 1488.102 | 1487.694732 | 0.984956  | 0.00221   | 1.938    | --     |
| CJ000197       |          | turquoise | 1567.338 | 1566.945397 | 0.9989097 | 4.32E-05  | 14.152   | --     |
| CJ039155       |          | turquoise | 1414.531 | 1413.710978 | 0.974584  | 0.0048454 | 3.914    | 99     |
| DN110566       |          | turquoise | 1550.354 | 1549.896149 | 0.9976456 | 0.0001371 | 12.738   | --     |
| DN116453       |          | turquoise | 1562.809 | 1562.400229 | 0.998281  | 8.55E-05  | 1.936    | 99     |
| DN116548       |          | turquoise | 1557.426 | 1557.019782 | 0.9972723 | 0.0001709 | 18.958   | --     |
| DN123890       |          | turquoise | 1511.379 | 1510.964162 | 0.9911326 | 0.001001  | 2.416    | --     |
| DN125647       |          | turquoise | 341.7533 | 337.5968891 | 0.6667547 | 0.2190185 | 28.14    | --     |
| DN134303       |          | turquoise | 1366.245 | 1365.673502 | 0.9650152 | 0.0078138 | 2.618    | --     |
| BW975440       |          | turquoise | 1303.985 | 1302.695245 | 0.9572686 | 0.0105354 | 55.31    | --     |
| BW974451       |          | turquoise | 1367.794 | 1367.256001 | 0.9654576 | 0.0076665 | 5.056    | --     |
| AJ953116       |          | turquoise | 1518.292 | 1517.912805 | 0.991504  | 0.0009389 | 36.452   | --     |
| AJ956957       |          | turquoise | 1433.818 | 1433.336354 | 0.9775332 | 0.0040288 | 12.776   | --     |
| AJ963372       |          | turquoise | 1544.36  | 1543.917339 | 0.9967336 | 0.000224  | 9.754    | --     |
| DY431973       |          | turquoise | 1555.52  | 1555.064007 | 0.9980488 | 0.0001034 | 2.912    | --     |
| DB803190       |          | turquoise | 326.4111 | 298.7960394 | 0.5840532 | 0.30112   | 7.886    | --     |

|          |           |          |             |           |           |        |    |    |
|----------|-----------|----------|-------------|-----------|-----------|--------|----|----|
| DB805308 | turquoise | 1517.783 | 1517.386105 | 0.9895927 | 0.0012725 | 15.212 | -- |    |
| DT322380 | turquoise | 1475.709 | 1475.281009 | 0.982373  | 0.0028019 | 14.786 |    | 99 |
| EV893970 | turquoise | 1121.396 | 1120.361801 | 0.9163036 | 0.0286989 | 9.78   | -- |    |
| EW054351 | turquoise | 1508.531 | 1508.091003 | 0.9901383 | 0.0011739 | 3.964  | -- |    |
| EW102856 | turquoise | 1515.392 | 1515.005452 | 0.9894589 | 0.0012971 | 22.536 | -- |    |
| EW242994 | turquoise | 1536.614 | 1536.116018 | 0.9948648 | 0.0004414 | 13.178 | -- |    |
| EW524057 | turquoise | 1498.231 | 1497.624765 | 0.988803  | 0.0014199 | 2.834  | -- |    |
| AW360262 | turquoise | 1539.154 | 1538.780411 | 0.9944244 | 0.0004994 | 3.456  | -- |    |
| BI183745 | turquoise | 1489.484 | 1488.931447 | 0.9870269 | 0.0017703 | 5.206  | -- |    |
| BQ603067 | turquoise | 1499.108 | 1498.691662 | 0.988443  | 0.0014888 | 4.768  | -- |    |

---

Table S6-4. Module eigengene and its evolutionary rates in six prenatal highly LDE-specific modules (LDE\_pink).

| pig_Gene   | pig_Gene | LDEModule | kTotal    | kWithin   | eigencorr | eigenpval | meanExpr | Ka/Ks  |
|------------|----------|-----------|-----------|-----------|-----------|-----------|----------|--------|
| NM_00104   | CACNG1   | pink      | 222.66791 | 45.605862 | 0.9884354 | 0.0014903 | 41.894   | 0      |
| NM_00104   | NRAP     | pink      | 194.85748 | 44.968614 | 0.9851952 | 0.0021576 | 21.004   | 0.117  |
| AK237778.1 |          | pink      | 172.50745 | 41.768128 | 0.9679263 | 0.0068621 | 9.164    | --     |
| AK231853   | NFKBIB   | pink      | 124.83246 | 30.550397 | 0.8949716 | 0.0402097 | 32.994   | 0      |
| AK231968   | TCEA3    | pink      | 246.21013 | 46.617622 | 0.9916924 | 0.0009078 | 44.57    | --     |
| AK232023   | PDLIM5   | pink      | 264.13779 | 41.856132 | 0.9631439 | 0.0084466 | 89.204   | --     |
| NM_00100   | FGL2     | pink      | 230.89593 | 46.898997 | 0.9933682 | 0.0006477 | 32.382   | 0      |
| NM_00109   | ADSSL1   | pink      | 271.07946 | 38.297432 | 0.941298  | 0.016922  | 37.162   | --     |
| NM_00112   | AMPD1    | pink      | 248.04252 | 44.712664 | 0.9808188 | 0.0031798 | 170.728  | 0.0238 |
| NM_00112   | TPM2     | pink      | 282.17639 | 39.126512 | 0.9472233 | 0.0144387 | 4239.712 | 99     |
| XM_00192   | NDUFB9   | pink      | 183.62776 | 38.79323  | 0.9527904 | 0.0122259 | 136.806  | 0      |
| XM_00192   | ZFP36L1  | pink      | 284.22755 | 38.836413 | 0.9443871 | 0.0156114 | 788.818  | 0      |
| XM_00192   | APOBEC2  | pink      | 265.18388 | 45.311153 | 0.9826421 | 0.0027381 | 270.856  | --     |
| XM_00192   | C6orf62  | pink      | 243.83199 | 44.116579 | 0.9802339 | 0.003326  | 403.634  | 99     |
| XM_00192   | MTMR14   | pink      | 218.95052 | 46.520639 | 0.9922867 | 0.0008123 | 38.65    | 99     |
| XM_00192   | ACTN2    | pink      | 248.98847 | 45.260147 | 0.9847626 | 0.0022527 | 652.286  | 0      |
| XM_00192   | ANK3     | pink      | 200.03273 | 43.540449 | 0.9787203 | 0.0037144 | 72.954   | 0.1356 |
| XM_00192   | FBRSL1   | pink      | 115.66024 | 24.424066 | 0.8500171 | 0.0681359 | 75.99    | --     |
| XM_00192   | IGSF1    | pink      | 210.95867 | 39.050031 | 0.9519906 | 0.0125363 | 62.096   | 0.7994 |
| NM_00113   | AGPAT2   | pink      | 206.94134 | 45.040136 | 0.9852372 | 0.0021484 | 24.728   | 0      |
| NM_00113   | PGAM2    | pink      | 276.60952 | 41.334226 | 0.9610084 | 0.0091883 | 300.808  | 0      |
| NM_21383   | FOLR1    | pink      | 119.02351 | 28.849725 | 0.8822425 | 0.0476423 | 5.528    | 0.0744 |
| NM_00100   | DES      | pink      | 264.71716 | 45.041149 | 0.9816667 | 0.0029716 | 2674.704 | 0      |
| AY610291   | EIF4EBP1 | pink      | 281.18637 | 39.985893 | 0.9512544 | 0.0128244 | 131.136  | --     |
| NM_00100   | TNNT3    | pink      | 232.16986 | 42.290755 | 0.9718416 | 0.0056481 | 1892.508 | --     |
| AY870324   | GYS1     | pink      | 152.77554 | 36.463063 | 0.9375128 | 0.0185741 | 37.738   | --     |
| CF181210   |          | pink      | 198.62551 | 46.158613 | 0.9909417 | 0.0010335 | 23.09    | --     |
| BX667493   |          | pink      | 182.46358 | 43.025365 | 0.9752058 | 0.0046691 | 24.436   | 0      |
| BX667667   |          | pink      | 211.06293 | 36.010534 | 0.9328793 | 0.0206632 | 43.826   | --     |
| BX670880   |          | pink      | 283.68867 | 38.889801 | 0.9449823 | 0.0153628 | 218.222  | --     |
| BX672685   |          | pink      | 206.46187 | 42.131161 | 0.9718883 | 0.0056341 | 95.858   | --     |
| CK458789   |          | pink      | 157.98382 | 37.848699 | 0.9471256 | 0.0144786 | 89.55    | --     |
| BX916224   |          | pink      | 267.76899 | 40.175477 | 0.9557881 | 0.0110851 | 283.934  | --     |
| BX921034   |          | pink      | 127.6131  | 31.298959 | 0.9034285 | 0.0354989 | 21.084   | --     |
| BX922054   |          | pink      | 254.77606 | 45.56607  | 0.9846185 | 0.0022847 | 418.774  | --     |
| BX923137   |          | pink      | 197.867   | 45.403096 | 0.9872477 | 0.0017254 | 42.48    | --     |
| CN157030   |          | pink      | 148.37004 | 29.116446 | 0.8955294 | 0.0398932 | 41.954   | 0.4429 |
| CN161458   |          | pink      | 127.96985 | 31.111066 | 0.9017634 | 0.0364115 | 64.14    | --     |
| DN110939   |          | pink      | 212.77254 | 46.898754 | 0.9941936 | 0.0005307 | 25.204   | --     |
| DN112227   |          | pink      | 146.10712 | 32.491468 | 0.9148102 | 0.0294637 | 4.1      | --     |
| DN114469   |          | pink      | 262.88262 | 45.501226 | 0.9836685 | 0.0024992 | 90.372   | --     |
| DN120355   |          | pink      | 230.87838 | 45.363356 | 0.9869353 | 0.0017891 | 23.27    | --     |
| DN124256   |          | pink      | 226.76652 | 47.875655 | 0.998756  | 5.27E-05  | 182.242  | --     |
| AJ964843   |          | pink      | 263.47247 | 43.699468 | 0.9742527 | 0.0049402 | 61.292   | --     |
| CX064206   |          | pink      | 243.22545 | 47.68931  | 0.9964545 | 0.0002533 | 86.912   | --     |

|          |      |           |           |           |           |         |    |    |
|----------|------|-----------|-----------|-----------|-----------|---------|----|----|
| DY433232 | pink | 238.68022 | 47.744941 | 0.9972109 | 0.0001767 | 247.776 | -- |    |
| DB784140 | pink | 213.76258 | 40.857727 | 0.9650424 | 0.0078047 | 31.14   | -- |    |
| DT329597 | pink | 234.04303 | 40.714296 | 0.9597588 | 0.0096316 | 13.93   | -- | 0  |
| DT332656 | pink | 173.78998 | 42.02167  | 0.9699696 | 0.0062188 | 22.234  | -- |    |
| EH412677 | pink | 266.91299 | 43.679849 | 0.9739402 | 0.0050302 | 43.444  | -- |    |
| EW075087 | pink | 146.70996 | 36.457469 | 0.9367171 | 0.0189277 | 18.472  | -- |    |
| EW238443 | pink | 223.99784 | 44.949748 | 0.9835656 | 0.0025229 | 57.318  | -- |    |
| EW308219 | pink | 264.86842 | 41.646575 | 0.9643413 | 0.0080398 | 100.3   | -- |    |
| EW319834 | pink | 193.88088 | 45.148426 | 0.9859224 | 0.0020008 | 5.624   | -- |    |
| EW491431 | pink | 227.27677 | 47.492738 | 0.9965225 | 0.000246  | 46.79   | -- |    |
| EW570202 | pink | 213.70909 | 45.601859 | 0.9880302 | 0.0015692 | 12.708  | -- |    |
| BM190349 | pink | 281.46571 | 38.185941 | 0.9424685 | 0.0164214 | 3.952   | -- | 99 |
| BM190547 | pink | 125.0224  | 31.066569 | 0.8981527 | 0.0384158 | 9.926   | -- |    |
| BM190692 | pink | 221.68114 | 46.597777 | 0.9931654 | 0.0006776 | 12.692  | -- |    |

---

Table S6-5. Module eigengene and its evolutionary rates in six prenatal highly LDE-specific modules (LDE\_red).

| pig_Genebank   | pig_Gene | LDE    |        |         | eigencorr | eigenpval | meanExpr | LTModule    | Ka/Ks |
|----------------|----------|--------|--------|---------|-----------|-----------|----------|-------------|-------|
|                |          | Module | kTotal | kWithin |           |           |          |             |       |
| AK230715.1     | MALAT1   | red    | 265.89 | 45.0549 | 0.9596704 | 0.0096633 | 77.63    | greenyellow | --    |
| AK237425.1     | AOC3     | red    | 248.18 | 50.9308 | 0.9896226 | 0.001267  | 32.564   | greenyellow | --    |
| AK237684.1     | PRKAG2   | red    | 197.19 | 50.5139 | 0.9896888 | 0.0012549 | 61.634   | royalblue   | 0     |
| AK232067.1     | MRPL45   | red    | 244.37 | 51.5768 | 0.9926557 | 0.0007547 | 66.752   | turquoise   | --    |
| AK232780.1     | USP2     | red    | 188.46 | 48.0601 | 0.9788494 | 0.0036807 | 9.784    | red         | 0     |
| AK239575.1     | ALAS1    | red    | 148.78 | 34.3256 | 0.9061264 | 0.0340359 | 19.912   | turquoise   | 0     |
| AK236674.1     | WBSCR22  | red    | 167.69 | 43.5627 | 0.9569751 | 0.0106437 | 46.508   | turquoise   | 0     |
| AK233231.1     | NDUFS8   | red    | 256.59 | 45.3366 | 0.9629729 | 0.0085052 | 152.784  | navy        | --    |
| EU650276.1     | SLC16A3  | red    | 246.02 | 43.6677 | 0.9550598 | 0.0113589 | 8.976    | red         | 0     |
| NM_001128433.1 | SLC2A4   | red    | 181.42 | 47.8391 | 0.977446  | 0.0040522 | 26.03    | purple      | --    |
| XM_001929195.1 | PPP6C    | red    | 254.38 | 49.7468 | 0.9833139 | 0.0025809 | 201.388  | magenta     | 0     |
| XM_001924679.1 | AK3      | red    | 204.15 | 50.0207 | 0.9878033 | 0.001614  | 26.202   | turquoise   | --    |
| XM_001926680.1 | FBXL4    | red    | 132.71 | 32.9779 | 0.8955426 | 0.0398858 | 24.248   | navy        | 0.135 |
| XM_001928966.1 | CASQ1    | red    | 178.14 | 47.2082 | 0.9743814 | 0.0049033 | 43.322   | purple      | 0     |
| XM_001928924.1 | RCSD1    | red    | 232.3  | 50.1842 | 0.9879546 | 0.0015841 | 22.378   | darkgreen   | 0.2   |
| XM_001929272.1 | COQ10A   | red    | 210.71 | 49.7557 | 0.9865427 | 0.0018702 | 19.288   | navy        | --    |
| XM_001927338.1 | IDH3A    | red    | 223.67 | 48.452  | 0.9802371 | 0.0033252 | 65.578   | navy        | 0.176 |
| XM_001929023.1 | LPAR6    | red    | 131.7  | 34.5756 | 0.9034058 | 0.0355112 | 56.558   | greenyellow | 0     |
| XM_001927832.1 | FAM190B  | red    | 141.74 | 36.3026 | 0.9150798 | 0.0293251 | 13.25    | yellow      | 99    |
| XM_001929063.1 | MAFB     | red    | 144.09 | 39.1359 | 0.9309103 | 0.0215725 | 35.88    | purple      | --    |
| XM_001925452.1 | ATG4A    | red    | 233    | 48.2948 | 0.9787616 | 0.0037036 | 8.698    | brown       | --    |
| NM_001130733.1 | ADSL     | red    | 181.99 | 43.8187 | 0.9594474 | 0.0097432 | 84.19    | brown       | 0.135 |
| NM_001142669.1 | TEAD1    | red    | 153.5  | 37.939  | 0.9268099 | 0.0235064 | 7.152    | brown       | 0     |
| NM_213980.1    | UGP2     | red    | 155.8  | 39.9964 | 0.937392  | 0.0186276 | 45.766   | magenta     | 0     |
| NM_213986.1    | MYOC     | red    | 190.84 | 48.687  | 0.9822451 | 0.0028324 | 1.516    | greenyellow | 0.14  |
| NM_214356.1    | RGS5     | red    | 235.39 | 52.5421 | 0.9974947 | 0.0001505 | 52.11    | white       | 0     |
| AY610012.1     | C1GALT1C | red    | 262.93 | 45.1388 | 0.9600264 | 0.0095361 | 32.22    | magenta     | 99    |
| AY610394.1     | NDUFS4   | red    | 247.77 | 50.0307 | 0.985071  | 0.0021848 | 133.056  | royalblue   | 99    |
| NM_001006592.1 | MYLPF    | red    | 257.63 | 49.4895 | 0.9828621 | 0.0026863 | 4419.722 | brown       | 0     |
| NM_214136.1    | MYH2     | red    | 232.59 | 50.4905 | 0.9899538 | 0.0012069 | 18.784   | purple      | 0     |
| DQ058292       |          | red    | 260.47 | 49.17   | 0.9809435 | 0.0031489 | 43.262   | navy        | --    |
| CF360662       |          | red    | 200.03 | 49.5241 | 0.9860683 | 0.0019698 | 6.648    | royalblue   | --    |
| BX671489       |          | red    | 272.55 | 45.2479 | 0.9604959 | 0.0093693 | 19.284   | brown       | --    |
| BX673719       |          | red    | 264.11 | 48.03   | 0.9746379 | 0.0048301 | 3.078    | yellow      | 0     |
| BX675832       |          | red    | 269.84 | 44.9408 | 0.9581903 | 0.0101978 | 86.93    | turquoise   | --    |
| CK449832       |          | red    | 205.45 | 50.4924 | 0.9902067 | 0.0011617 | 44.278   | violet      | --    |
| CK453720       |          | red    | 154.99 | 37.7393 | 0.9267153 | 0.0235516 | 30.29    | darkgreen   | --    |
| BX916417       |          | red    | 232.05 | 51.6131 | 0.9941974 | 0.0005301 | 18.122   | yellowgreen | --    |
| BX918145       |          | red    | 262.26 | 45.6448 | 0.9623204 | 0.0087302 | 85.238   | red         | --    |
| BX920496       |          | red    | 201.4  | 50.5198 | 0.9900022 | 0.0011982 | 2.12     | purple      | 0     |
| BX921928       |          | red    | 149.17 | 40.9268 | 0.9408825 | 0.0171009 | 2.756    | turquoise   | --    |
| BX924065       |          | red    | 206.22 | 51.0515 | 0.9923812 | 0.0007974 | 25.374   | purple      | --    |
| CN156385       |          | red    | 258.96 | 47.2962 | 0.9714054 | 0.0057795 | 14.52    | royalblue   | --    |
| DN104974       |          | red    | 274.46 | 44.179  | 0.9542187 | 0.0116778 | 7.358    | lightyellow | --    |
| DN120811       |          | red    | 164.36 | 42.7975 | 0.9528989 | 0.012184  | 4.118    | turquoise   | --    |
| AJ947734       |          | red    | 131.09 | 35.1865 | 0.9085637 | 0.0327313 | 13.95    | purple      | --    |

|          |     |     |        |         |           |           |         |             |       |
|----------|-----|-----|--------|---------|-----------|-----------|---------|-------------|-------|
| AJ954681 |     | red | 143.36 | 35.2945 | 0.911971  | 0.0309352 | 115.48  | turquoise   | --    |
| AJ956925 |     | red | 279.26 | 41.8389 | 0.941503  | 0.0168339 | 22.08   | blue        | --    |
| AJ961806 |     | red | 205.86 | 51.7625 | 0.9952051 | 0.0003983 | 10.256  | purple      | --    |
| AJ962029 |     | red | 243.29 | 51.7878 | 0.994299  | 0.0005163 | 5.24    | yellow      | --    |
| AJ945191 |     | red | 252.35 | 45.3417 | 0.961515  | 0.0090105 | 1.052   | turquoise   | --    |
| DV901297 |     | red | 176.14 | 46.6156 | 0.9720362 | 0.0055898 | 5.2     | yellowgreen | --    |
| DY437561 |     | red | 257.44 | 49.5023 | 0.9828446 | 0.0026904 | 55.22   | violet      | --    |
| DQ459258 | SLN | red | 184.13 | 40.4421 | 0.9416626 | 0.0167655 | 34.582  | brown       | --    |
| DT331413 |     | red | 202.52 | 48.4116 | 0.980266  | 0.0033179 | 11.87   | purple      | --    |
| EW088403 |     | red | 266.65 | 47.168  | 0.9702832 | 0.006122  | 94.282  | purple      | --    |
| EW168087 |     | red | 218.14 | 46.9651 | 0.9735341 | 0.0051479 | 114.234 | darkmagenta | --    |
| EW189742 |     | red | 162.54 | 42.5166 | 0.9513595 | 0.0127831 | 3.632   | turquoise   | --    |
| EW190405 |     | red | 261.98 | 44.8398 | 0.9581683 | 0.0102058 | 7.8     | turquoise   | --    |
| EW269870 |     | red | 254.92 | 46.5423 | 0.9686493 | 0.0066321 | 136.212 | brown       | --    |
| EW633584 |     | red | 192.96 | 47.3713 | 0.976259  | 0.0043755 | 35.772  | purple      | 0.725 |
| FL593097 |     | red | 181.97 | 46.5952 | 0.9723157 | 0.0055065 | 2.452   | brown       | --    |
| BF190620 |     | red | 228.2  | 50.6379 | 0.9893035 | 0.0013259 | 3.036   | purple      | --    |
| BI185477 |     | red | 244.47 | 42.084  | 0.9456684 | 0.0150779 | 5.082   | darkred     | 0     |

---



Table S6-6. Module eigengene and its evolutionary rates in six prenatal highly LDE-specific modules (LDE\_tan).

| pig_Genebank   | pig_Gene | Modul<br>e | kTotal  | kWithin   | eigencorr | eigenpval | meanExpr | LTModule    | Ka/Ks  |
|----------------|----------|------------|---------|-----------|-----------|-----------|----------|-------------|--------|
|                |          |            |         |           |           |           |          |             |        |
| AK237695.1     | NOP14    | tan        | 256.704 | 34.712864 | 0.9606412 | 0.0093178 | 37.326   | brown       | 0.3033 |
| AK235136.1     | DECR2    | tan        | 301.228 | 37.229474 | 0.9761727 | 0.0043993 | 16.876   | turquoise   | --     |
| AK232459.1     | GLTSCR2  | tan        | 305.382 | 40.130737 | 0.9932518 | 0.0006648 | 61.57    | red         | 0      |
| AK238836.1     | EIF4H    | tan        | 329.71  | 35.426133 | 0.9637589 | 0.0082368 | 206.558  | turquoise   | --     |
| AK239538.1     | MEF2D    | tan        | 340.833 | 35.40572  | 0.9633816 | 0.0083653 | 50.872   | brown       | --     |
| AK233129.1     | CCDC92   | tan        | 245.781 | 32.301366 | 0.9462038 | 0.0148568 | 2.76     | turquoise   | 0.3261 |
| AK236617.1     | G3BP2    | tan        | 320.625 | 38.44607  | 0.9831321 | 0.0026231 | 31.808   | darkred     | 99     |
| NM_001113439.1 | SFRS18   | tan        | 340.698 | 35.762954 | 0.9669432 | 0.0071789 | 113.09   | magenta     | 99     |
| XM_001928798.1 | OSR2     | tan        | 272.344 | 37.347542 | 0.9772498 | 0.0041051 | 17.398   | violet      | 0      |
| XM_001925424.1 | ANO6     | tan        | 285.183 | 37.82541  | 0.9821233 | 0.0028615 | 31.746   | magenta     | --     |
| XM_001928309.1 | TBC1D7   | tan        | 224.06  | 28.218216 | 0.9159158 | 0.0288968 | 17.818   | blue        | 0      |
| XM_001928393.1 | GBF1     | tan        | 241.249 | 30.711903 | 0.9332043 | 0.0205143 | 72.36    | navy        | 0      |
| XM_001928504.1 | GATC     | tan        | 308.616 | 36.342307 | 0.970885  | 0.0059375 | 13.16    | turquoise   | 99     |
| AY803094.1     | SS18L1   | tan        | 299.259 | 39.508533 | 0.9915737 | 0.0009273 | 22.096   | turquoise   | --     |
| BX667249       |          | tan        | 266.467 | 35.292984 | 0.9675986 | 0.0069672 | 10.552   | blue        | --     |
| BX675350       |          | tan        | 341.677 | 36.050758 | 0.9698412 | 0.0062586 | 13.634   | lightgreen  | 99     |
| BP173173       |          | tan        | 231.795 | 25.693418 | 0.8979996 | 0.0385015 | 9.668    | turquoise   | 99     |
| BP440506       |          | tan        | 292.17  | 35.409501 | 0.966546  | 0.0073083 | 10.772   | brown       | --     |
| CK451418       |          | tan        | 235.717 | 33.320479 | 0.9525894 | 0.0123036 | 55.092   | turquoise   | 0      |
| BX917182       |          | tan        | 260.996 | 33.163519 | 0.9544042 | 0.0116072 | 26.948   | turquoise   | --     |
| BX920877       |          | tan        | 318.285 | 38.001197 | 0.9814942 | 0.0030136 | 18.202   | navy        | --     |
| BX924453       |          | tan        | 313.259 | 39.693992 | 0.9910016 | 0.0010233 | 18.038   | darkgrey    | --     |
| BX924845       |          | tan        | 320.63  | 40.531341 | 0.995816  | 0.0003247 | 37.976   | turquoise   | --     |
| BX925452       |          | tan        | 305.154 | 36.610243 | 0.9728426 | 0.0053504 | 21.764   | darkturquoi | --     |
| CN166292       |          | tan        | 331.626 | 39.239134 | 0.9881784 | 0.0015402 | 4.236    | yellow      | --     |
| DN115175       |          | tan        | 312.215 | 40.733281 | 0.9971939 | 0.0001784 | 21.012   | turquoise   | --     |
| DN116048       |          | tan        | 324.516 | 38.172695 | 0.9812528 | 0.0030727 | 12.306   | turquoise   | 0      |
| BW973127       |          | tan        | 350.525 | 35.158875 | 0.9632083 | 0.0084246 | 19.344   | navy        | 99     |
| AJ956510       |          | tan        | 292.638 | 31.296257 | 0.9383351 | 0.0182109 | 87.396   | tan         | --     |
| DY418504       |          | tan        | 335.092 | 37.396201 | 0.9772215 | 0.0041127 | 32.828   | darkturquoi | --     |
| DY420049       |          | tan        | 172.239 | 14.01251  | 0.7785082 | 0.1208893 | 3.74     | turquoise   | --     |
| DY420192       |          | tan        | 284.549 | 38.646306 | 0.9866842 | 0.0018408 | 30.22    | black       | --     |
| DT324183       |          | tan        | 322.58  | 38.415849 | 0.9828397 | 0.0026915 | 17.484   | brown       | 0      |
| EV871347       |          | tan        | 278.719 | 34.853129 | 0.9631486 | 0.008445  | 112.226  | grey60      | --     |
| EV947055       |          | tan        | 326.859 | 38.644252 | 0.9839354 | 0.0024383 | 29.692   | darkturquoi | --     |
| EV956580       |          | tan        | 332.485 | 40.56677  | 0.9955279 | 0.0003588 | 176.924  | red         | --     |
| EW084349       |          | tan        | 335.479 | 37.984471 | 0.9803337 | 0.0033009 | 14.036   | navy        | --     |
| EW089029       |          | tan        | 305.675 | 35.429961 | 0.9648077 | 0.0078831 | 39.494   | turquoise   | --     |
| EW117408       |          | tan        | 338.469 | 39.721314 | 0.9905984 | 0.0010928 | 8.198    | lightcyan   | --     |
| EW129629       |          | tan        | 293.715 | 38.185359 | 0.9837138 | 0.0024889 | 254.708  | pink        | --     |
| EW137538       |          | tan        | 238.379 | 32.476433 | 0.9494463 | 0.0135408 | 2607.526 | blue        | --     |
| EW143863       |          | tan        | 223.158 | 30.134707 | 0.9333086 | 0.0204666 | 49.726   | turquoise   | --     |
| EW146447       |          | tan        | 341.213 | 37.531213 | 0.9768459 | 0.0042147 | 44.178   | blue        | --     |

|          |     |         |           |           |           |         |           |    |
|----------|-----|---------|-----------|-----------|-----------|---------|-----------|----|
| EW155191 | tan | 180.585 | 23.528778 | 0.8746816 | 0.0522419 | 4.768   | --        |    |
| EW203772 | tan | 266.682 | 36.981542 | 0.9765682 | 0.0042905 | 53.896  | turquoise | 99 |
| EW275601 | tan | 310.855 | 36.74347  | 0.9739089 | 0.0050393 | 53.082  | magenta   | -- |
| EW495920 | tan | 282.84  | 37.887738 | 0.9822768 | 0.0028248 | 945.06  | brown     | 0  |
| EW537674 | tan | 326.636 | 37.536406 | 0.9786353 | 0.0037367 | 165.472 | pink      | -- |
| EW577076 | tan | 329.428 | 36.679733 | 0.9718428 | 0.0056477 | 21.732  | magenta   | 99 |
| BE235135 | tan | 245.376 | 34.45583  | 0.9612675 | 0.0090972 | 61.35   | turquoise | -- |

---

Table S7-1. Module eigengene and its evolutionary rates in five prenatal highly LT-specific modules (LT\_blue).

| pig_Genebank   | pig_Gene  | LDE         | kTotal    | kWithin   | eigencorr | eigenpval | mean    | LT     | Ka/Ks  |
|----------------|-----------|-------------|-----------|-----------|-----------|-----------|---------|--------|--------|
|                |           | Module      |           |           |           |           | Expr    | Module |        |
| AK235372.1     | 3-Mar     | turquoise   | 1312.5425 | 1311.6717 | 0.9616276 | 0.0089711 | 9.836   | blue   | 0      |
| AK233469.1     | AARSD1    | blue        | 296.1659  | 146.44487 | 0.9821559 | 0.0028537 | 19.05   | blue   | --     |
| AK230529.1     | ABI1      | turquoise   | 994.59779 | 993.04999 | 0.8904415 | 0.0428089 | 19.208  | blue   | 99     |
| XM_001927332.1 | AGA       | blue        | 270.55781 | 122.70937 | 0.9414336 | 0.0168637 | 11.314  | blue   | 0.4132 |
| NM_001128455.1 | AKIRIN1   | turquoise   | 239.03453 | 198.84308 | 0.4712025 | 0.4230531 | 4.874   | blue   | --     |
| AK230942       | ANXA1     | brown       | 253.15986 | 128.30247 | 0.9963858 | 0.0002607 | 5.85    | blue   | --     |
| AK236330.1     | ANXA4     | greenyellow | 209.80999 | 22.733135 | 0.9800312 | 0.0033772 | 5.752   | blue   | 0.1941 |
| XM_001924669.1 | APH1A     | brown       | 214.48815 | 118.56353 | 0.9813154 | 0.0030573 | 14.186  | blue   | --     |
| AK233864.1     | ARF5      | turquoise   | 575.13309 | 567.49577 | 0.7621256 | 0.1341893 | 20.074  | blue   | 99     |
| XM_001926997.1 | ARHGAP2   | turquoise   | 1360.6769 | 1359.9309 | 0.9688881 | 0.0065567 | 47.808  | blue   | 0.3509 |
| AY610050.1     | ARL2BP    | turquoise   | 271.07202 | 236.79743 | 0.5201895 | 0.3688927 | 42.84   | blue   | 0      |
| AK236628       | ATIC      | brown       | 283.15852 | 105.16021 | 0.9368393 | 0.0188732 | 5.838   | blue   | 0.0443 |
| AK236671.1     | ATP11A    | brown       | 290.98955 | 113.96896 | 0.9581885 | 0.0101985 | 117.404 | blue   | --     |
| XM_001925710.1 | BCAS2     | turquoise   | 132.7937  | 69.037234 | 0.2691289 | 0.6615172 | 39.102  | blue   | 0      |
| AY609731.1     | C6orf115  | darkgreen   | 281.14403 | 22.694525 | 0.9865345 | 0.0018719 | 3.066   | blue   | 99     |
| XM_001925294.1 | C9orf119  | turquoise   | 172.61649 | 116.90623 | 0.3640762 | 0.5468985 | 18.762  | blue   | 99     |
| XM_001924741.1 | CAB39     | turquoise   | 108.79724 | 71.442373 | 0.3118515 | 0.6094715 | 19.492  | blue   | 99     |
| AK240220.1     | CCDC124   | turquoise   | 1543.317  | 1542.9268 | 0.994314  | 0.0005142 | 30.804  | blue   | 99     |
| AY609717.1     | CCT4      | brown       | 228.74223 | 120.75371 | 0.9820405 | 0.0028814 | 4.718   | blue   | 0      |
| AK230614       | CD36      | royalblue   | 150.11832 | 21.678685 | 0.9521029 | 0.0124926 | 2.418   | blue   | 0.3146 |
| XM_001928774.1 | COQ10B    | royalblue   | 205.08773 | 19.955998 | 0.9364927 | 0.0190278 | 37.174  | blue   | 0.3627 |
| XM_001927225.1 | COX17     | greenyellow | 213.18719 | 22.351233 | 0.9912274 | 0.000985  | 36.108  | blue   | --     |
| XM_001925488.1 | CTNNB1    | lightcyan   | 150.31109 | 6.9939101 | 0.2877061 | 0.6387995 | 25.408  | blue   | --     |
| AK232389       | CTSB      | blue        | 317.11005 | 150.04959 | 0.9877864 | 0.0016173 | 19.674  | blue   | 0      |
| AK230569.1     | DHX15     | purple      | 212.20666 | 36.275485 | 0.9978889 | 0.0001164 | 93.67   | blue   | 0      |
| XM_001928813.1 | DNTTIP1   | turquoise   | 133.86209 | 66.046359 | 0.2499808 | 0.6850614 | 24.616  | blue   | 0      |
| AK231026.1     | EIF1AX    | brown       | 213.82197 | 107.37512 | 0.9520912 | 0.0124971 | 6.882   | blue   | --     |
| AF288822.1     | EIF4G2    | turquoise   | 335.34784 | 323.70307 | 0.6443971 | 0.2405131 | 41.59   | blue   | --     |
| AY610090.1     | ELOF1     | brown       | 223.60538 | 126.97765 | 0.9959382 | 0.0003106 | 7.032   | blue   | --     |
| AK234725.1     | GNB1      | brown       | 213.46397 | 94.772289 | 0.9216535 | 0.0260131 | 58.926  | blue   | --     |
| NM_214332.1    | GNB2L1    | brown       | 305.0296  | 113.7983  | 0.9564947 | 0.0108216 | 505.572 | blue   | --     |
| AK233386.1     | GOLGB1    | turquoise   | 480.53255 | 473.7115  | 0.7330659 | 0.1587585 | 24.874  | blue   | --     |
| AK239611.1     | HNRPD     | blue        | 318.64904 | 107.52453 | 0.9114652 | 0.0311998 | 159.888 | blue   | --     |
| XM_001924074.1 | HSBP1     | blue        | 339.96288 | 155.8771  | 0.9960467 | 0.0002982 | 88.756  | blue   | --     |
| XM_001929570.1 | HSP90AB1  | purple      | 185.47966 | 32.523844 | 0.9739796 | 0.0050188 | 646.798 | blue   | 0      |
| AK240329.1     | HSPA4     | brown       | 172.17955 | 82.67021  | 0.8968537 | 0.0391452 | 152.368 | blue   | 99     |
| AY610185.1     | HSPB11    | brown       | 255.26781 | 122.12031 | 0.980627  | 0.0032275 | 4.382   | blue   | 99     |
| XM_001924658.1 | IGF2BP2   | brown       | 134.71629 | 65.440898 | 0.845385  | 0.0712645 | 6.894   | blue   | 0      |
| AK234213.1     | KIAA1191  | turquoise   | 1500.808  | 1500.2591 | 0.9902978 | 0.0011455 | 7.072   | blue   | --     |
| XM_001928810.1 | KIAA1279  | magenta     | 328.07076 | 42.969476 | 0.9846293 | 0.0022823 | 103.902 | blue   | 0      |
| AK234175.1     | KIAA1467  | greenyellow | 201.69581 | 22.910172 | 0.9867411 | 0.0018291 | 8.424   | blue   | --     |
| AK236730.1     | LMCD1     | brown       | 199.63297 | 99.966213 | 0.9428554 | 0.0162569 | 19.694  | blue   | 0      |
| AY705918.1     | LOC100286 | lightgreen  | 85.761236 | 7.5093144 | 0.3958671 | 0.5094592 | 2.688   | blue   | --     |

|                |           |             |           |           |           |           |         |      |        |
|----------------|-----------|-------------|-----------|-----------|-----------|-----------|---------|------|--------|
| AK237193.1     | LOC100285 | brown       | 229.01771 | 105.08113 | 0.9479778 | 0.0141318 | 4.17    | blue | --     |
| AK233777.1     | LOC100291 | turquoise   | 159.30509 | 121.11779 | 0.4177854 | 0.4839665 | 58.212  | blue | --     |
| AJ236938.1     | LUC7L3    | greenyellow | 114.84568 | 14.065964 | 0.8925433 | 0.0415965 | 40.006  | blue | --     |
| XM_001927000.1 | LUM       | turquoise   | 1114.6794 | 1112.4033 | 0.9195729 | 0.0270475 | 79.74   | blue | 0.1529 |
| XM_001925291.1 | MAPK6     | turquoise   | 1521.6024 | 1521.2206 | 0.9905804 | 0.0010959 | 14.392  | blue | 0      |
| AK239435.1     | MAT2A     | greenyellow | 182.77511 | 22.63111  | 0.9865951 | 0.0018593 | 4.008   | blue | 99     |
| AY609565.1     | MRPL1     | brown       | 204.96949 | 111.60865 | 0.9618835 | 0.0088819 | 6.312   | blue | --     |
| AK234571.1     | MRPL12    | lightcyan   | 257.01276 | 24.717403 | 0.9854678 | 0.0020984 | 30.044  | blue | --     |
| AK234033.1     | MRPL53    | brown       | 180.12864 | 108.70009 | 0.9570442 | 0.0106181 | 20.712  | blue | --     |
| NM_001012406.1 | MYOG      | blue        | 314.88537 | 141.83586 | 0.9749181 | 0.0047504 | 14.59   | blue | 99     |
| AK234198.1     | N6AMT2    | yellow      | 303.25171 | 62.456991 | 0.8921234 | 0.0418378 | 84.382  | blue | --     |
| AY609572.1     | NDUFC2    | turquoise   | 105.8614  | 42.034712 | 0.1591403 | 0.7982348 | 91.158  | blue | --     |
| AK239935.1     | NUTF2     | blue        | 328.47811 | 150.91491 | 0.9888958 | 0.0014023 | 36.944  | blue | 0      |
| NM_214342.1    | OXSRI     | turquoise   | 1503.8578 | 1503.2354 | 0.9911009 | 0.0010064 | 29.856  | blue | 0      |
| AK239095.1     | PARN      | turquoise   | 239.90292 | 220.29251 | 0.5609892 | 0.3251957 | 13.562  | blue | 99     |
| AK235462.1     | PCBP1     | brown       | 342.85458 | 79.267558 | 0.8572618 | 0.0633315 | 167.73  | blue | 99     |
| NM_213901.1    | PCCB      | brown       | 185.81711 | 108.7788  | 0.9565789 | 0.0107904 | 4.214   | blue | 0      |
| XM_001924505.1 | PDGFRL    | brown       | 214.67194 | 115.0713  | 0.9695998 | 0.0063337 | 11.59   | blue | --     |
| XM_001926198.1 | PFDN5     | brown       | 280.46488 | 102.3997  | 0.9300918 | 0.0219543 | 42.51   | blue | 0      |
| NM_001097521.2 | PGRMC2    | brown       | 175.72024 | 106.69426 | 0.9561174 | 0.0109621 | 50.094  | blue | 99     |
| AK235272.1     | PJA1      | brown       | 164.44628 | 89.471691 | 0.9028537 | 0.0358131 | 8.468   | blue | 0.2562 |
| XM_001927189.1 | PLEKHA1   | turquoise   | 1514.3382 | 1513.9397 | 0.9898733 | 0.0012214 | 10.972  | blue | 99     |
| XM_001926988.1 | POLR1D    | blue        | 267.85059 | 125.89397 | 0.9479735 | 0.0141336 | 25.006  | blue | 0      |
| NM_214184.2    | PPP1CB    | turquoise   | 244.9903  | 229.76347 | 0.5699165 | 0.3158209 | 269.218 | blue | 99     |
| XM_001929641.1 | PSMB4     | blue        | 308.4231  | 150.29317 | 0.9880706 | 0.0015613 | 75.73   | blue | 0      |
| AK239491       | PSMB4     | turquoise   | 1570.6606 | 1570.2558 | 0.9996554 | 7.68E-06  | 3.76    | blue | --     |
| XM_001927985.1 | PSMC1     | turquoise   | 336.18992 | 321.40988 | 0.641716  | 0.2431273 | 42.514  | blue | 0      |
| XM_001927062.1 | PTBP2     | turquoise   | 1532.3002 | 1531.8177 | 0.9949281 | 0.0004333 | 18.184  | blue | --     |
| AY609534.1     | RAB6A     | magenta     | 304.82122 | 40.838439 | 0.9753712 | 0.0046226 | 9.2     | blue | --     |
| NM_001044620.1 | RABGGTB   | brown       | 249.036   | 124.81913 | 0.9889378 | 0.0013944 | 179.71  | blue | 0      |
| XM_001925435.1 | RBM34     | brown       | 288.84612 | 117.86111 | 0.9700801 | 0.0061846 | 38.09   | blue | 0.3836 |
| AK240580.1     | RCHY1     | blue        | 343.35614 | 145.06382 | 0.9793821 | 0.0035429 | 13.96   | blue | 99     |
| XM_001928955.1 | RCN2      | turquoise   | 1310.5142 | 1309.3818 | 0.960769  | 0.0092727 | 107.684 | blue | 99     |
| AK236398.1     | RNASEK    | brown       | 222.29614 | 110.27368 | 0.9591186 | 0.0098615 | 9.932   | blue | 0      |
| XM_001929330.1 | RNPC3     | turquoise   | 1272.363  | 1271.6234 | 0.9457256 | 0.0150542 | 11.784  | blue | --     |
| AK231197.1     | RPL36     | grey        | 289.13408 | 14.087015 | 0.8630738 | 0.0595575 | 619.35  | blue | 99     |
| NM_001037146.2 | RPSA      | brown       | 267.4518  | 127.34562 | 0.9909574 | 0.0010308 | 82.46   | blue | --     |
| AK238658.1     | SBDS      | brown       | 193.5692  | 110.41846 | 0.9595152 | 0.0097189 | 3.688   | blue | --     |
| XM_001926939.1 | SDC2      | lightcyan   | 152.0737  | 6.9697026 | 0.1744806 | 0.7789768 | 14.772  | blue | 0.2203 |
| AK234386.1     | SFT2D1    | brown       | 212.62377 | 120.25471 | 0.9813902 | 0.003039  | 19.588  | blue | 0.2254 |
| AK239788.1     | SMN1      | brown       | 212.33186 | 119.28194 | 0.9791891 | 0.0035926 | 13.296  | blue | 0.3603 |
| XM_001928820.1 | SNRPC     | turquoise   | 1433.9013 | 1433.152  | 0.9784646 | 0.0037814 | 25.034  | blue | 99     |
| AK234825.1     | SPCS2     | blue        | 343.68483 | 152.12339 | 0.9908058 | 0.0010568 | 38.476  | blue | 0      |
| XM_001928309.1 | TBC1D7    | tan         | 224.06047 | 28.218216 | 0.9159158 | 0.0288968 | 17.818  | blue | 0      |
| AK236676.1     | TGFB2     | blue        | 332.11328 | 99.890928 | 0.8950821 | 0.040147  | 21.6    | blue | 99     |
| NM_214198.1    | TGFB3     | brown       | 290.68063 | 95.41936  | 0.9102069 | 0.0318611 | 6.118   | blue | 99     |
| AK239167.1     | THAP3     | blue        | 338.09095 | 150.79479 | 0.9883679 | 0.0015034 | 7.646   | blue | 99     |
| AJ000786.1     | TMPRSS11  | brown       | 181.79083 | 107.54916 | 0.9528804 | 0.0121911 | 65.132  | blue | --     |

|                |        |             |           |           |           |           |         |      |        |
|----------------|--------|-------------|-----------|-----------|-----------|-----------|---------|------|--------|
| AK239234.1     | TPRG1L | blue        | 224.77309 | 106.85259 | 0.9109328 | 0.031479  | 14.562  | blue | 99     |
| XM_001924618.1 | TRAM1  | brown       | 228.00384 | 123.01017 | 0.9865305 | 0.0018727 | 128.9   | blue | 99     |
| XM_001927870.1 | TUFT1  | turquoise   | 1357.0076 | 1356.5144 | 0.9666728 | 0.0072669 | 2.084   | blue | 0.385  |
| AK236036.1     | UBA2   | turquoise   | 144.64724 | 96.41948  | 0.3486553 | 0.5652437 | 30.32   | blue | 99     |
| NM_214289.1    | UCP2   | grey        | 225.77404 | 13.794692 | 0.8555386 | 0.0644644 | 31.388  | blue | 0      |
| AY609470.1     | UFM1   | brown       | 189.46347 | 107.04026 | 0.9508352 | 0.0129893 | 41.19   | blue | --     |
| AK239385.1     | UTP18  | brown       | 237.41207 | 124.71035 | 0.989653  | 0.0012615 | 49.456  | blue | 0.1679 |
| AY609804.1     | VMA21  | brown       | 242.12098 | 120.9104  | 0.9817249 | 0.0029575 | 3.918   | blue | 99     |
| AK234587.1     | WDR41  | brown       | 288.17468 | 113.27477 | 0.9577945 | 0.0103424 | 2.758   | blue | --     |
| AK239624.1     | YWHAЕ  | brown       | 280.02325 | 107.87519 | 0.9495074 | 0.0135163 | 330.476 | blue | 4.6399 |
| AK234756.1     |        | brown       | 253.81595 | 129.05791 | 0.9964207 | 0.0002569 | 9.152   | blue | --     |
| AK236487.1     |        | brown       | 114.21979 | 49.465741 | 0.7585278 | 0.1371647 | 6.222   | blue | --     |
| AK232832.1     |        | turquoise   | 168.88679 | 132.06296 | 0.429563  | 0.4703833 | 2.124   | blue | --     |
| XM_001924115.1 |        | turquoise   | 1350.429  | 1349.858  | 0.9609578 | 0.0092061 | 2.704   | blue | --     |
| CD572587       |        | darkgreen   | 238.81649 | 22.901772 | 0.9810443 | 0.003124  | 7.806   | blue | --     |
| CF363829       |        | brown       | 219.54766 | 106.21236 | 0.9497174 | 0.0134325 | 7.026   | blue | --     |
| CF364773       |        | blue        | 286.51612 | 141.45986 | 0.974492  | 0.0048717 | 8.364   | blue | --     |
| BX664951       |        | turquoise   | 1531.1386 | 1530.7482 | 0.9926709 | 0.0007524 | 13.808  | blue | --     |
| BX666082       |        | turquoise   | 146.58385 | 60.941013 | 0.1812718 | 0.7704679 | 17.33   | blue | --     |
| BX666142       |        | brown       | 224.40523 | 112.28906 | 0.9656112 | 0.0076156 | 10.612  | blue | 99     |
| BX666658       |        | blue        | 340.92032 | 140.00141 | 0.9712276 | 0.0058333 | 4.58    | blue | --     |
| BX666730       |        | blue        | 253.18195 | 118.47665 | 0.9342899 | 0.0200195 | 32.114  | blue | --     |
| BX667155       |        | brown       | 253.5533  | 110.62918 | 0.9564398 | 0.010842  | 3.59    | blue | --     |
| BX667181       |        | brown       | 267.73003 | 126.237   | 0.9885516 | 0.0014679 | 20.406  | blue | --     |
| BX667249       |        | tan         | 266.46739 | 35.292984 | 0.9675986 | 0.0069672 | 10.552  | blue | --     |
| BX667682       |        | brown       | 275.29906 | 126.42451 | 0.9885369 | 0.0014708 | 49.36   | blue | 0      |
| BX668814       |        | darkgreen   | 325.58166 | 21.083574 | 0.9768386 | 0.0042166 | 34.842  | blue | --     |
| BX670378       |        | brown       | 156.14186 | 84.089669 | 0.9041971 | 0.0350801 | 56.766  | blue | --     |
| BX670664       |        | magenta     | 332.22321 | 41.437194 | 0.9790255 | 0.003635  | 22.31   | blue | --     |
| BX673036       |        | turquoise   | 1412.3922 | 1411.6897 | 0.9749195 | 0.0047501 | 2.66    | blue | --     |
| BX674124       |        | turquoise   | 157.25706 | 123.27742 | 0.4275894 | 0.4726537 | 17.956  | blue | --     |
| BX674131       |        | turquoise   | 1446.5322 | 1446.0266 | 0.9803558 | 0.0032954 | 14.064  | blue | --     |
| BX675880       |        | greenyellow | 238.49875 | 19.919724 | 0.9718923 | 0.0056329 | 15.478  | blue | --     |
| BX675945       |        | purple      | 192.14663 | 32.769127 | 0.9743666 | 0.0049076 | 37.834  | blue | --     |
| BX676412       |        | brown       | 216.22818 | 106.56154 | 0.9541495 | 0.0117041 | 15.692  | blue | --     |
| BP160416       |        | brown       | 256.85328 | 128.58861 | 0.9953134 | 0.0003849 | 6.596   | blue | --     |
| BP168099       |        | turquoise   | 991.97893 | 989.64349 | 0.89302   | 0.0413231 | 15.64   | blue | --     |
| BP459855       |        | turquoise   | 645.83886 | 640.31445 | 0.7948868 | 0.1080163 | 4.142   | blue | --     |
| CK449686       |        | brown       | 317.56885 | 98.845998 | 0.9168052 | 0.0284435 | 8.85    | blue | --     |
| CK450104       |        | blue        | 287.67639 | 143.17034 | 0.9764402 | 0.0043256 | 22.768  | blue | --     |
| CK452102       |        | grey        | 78.110987 | 7.6924039 | -0.001438 | 0.9981686 | 39.888  | blue | --     |
| CK452762       |        | blue        | 327.50196 | 156.252   | 0.9967778 | 0.0002195 | 38.726  | blue | --     |
| CK454645       |        | black       | 171.69421 | 24.48803  | 0.8599962 | 0.0615469 | 149.918 | blue | 0      |
| CK459361       |        | greenyellow | 195.83717 | 22.850578 | 0.9942178 | 0.0005273 | 37.534  | blue | --     |
| CK467320       |        | magenta     | 337.1785  | 42.87538  | 0.9848146 | 0.0022412 | 25.632  | blue | --     |
| CK467557       |        | turquoise   | 1559.6177 | 1559.1894 | 0.9985049 | 6.94E-05  | 1.636   | blue | --     |
| BX914521       |        | blue        | 293.8666  | 133.90848 | 0.9622753 | 0.0087458 | 14.796  | blue | 99     |
| BX915109       |        | brown       | 170.71369 | 77.004787 | 0.8818083 | 0.0479028 | 3.55    | blue | 0.3771 |

|          |             |           |           |           |           |         |      |    |        |
|----------|-------------|-----------|-----------|-----------|-----------|---------|------|----|--------|
| BX915128 | purple      | 257.70119 | 31.954623 | 0.9722273 | 0.0055328 | 95.766  | blue | -- |        |
| BX917211 | blue        | 311.92942 | 148.6979  | 0.9858626 | 0.0020136 | 46.514  | blue | -- |        |
| BX917406 | turquoise   | 1525.4195 | 1524.9214 | 0.9937541 | 0.000592  | 14.692  | blue | -- | 99     |
| BX919706 | brown       | 267.11272 | 105.91303 | 0.9399028 | 0.0175251 | 11.54   | blue | -- |        |
| BX922414 | blue        | 325.2434  | 153.0529  | 0.9920183 | 0.000855  | 11.774  | blue | -- |        |
| BX923548 | brown       | 287.80321 | 118.61407 | 0.9688137 | 0.0065802 | 109.696 | blue | -- | 0.2026 |
| BX926488 | brown       | 326.71558 | 95.814032 | 0.9083741 | 0.0328323 | 595.22  | blue | -- |        |
| CN154367 | blue        | 308.41054 | 148.42191 | 0.9848748 | 0.0022279 | 4.618   | blue | -- |        |
| CN155716 | green       | 111.04859 | 31.065108 | 0.8438273 | 0.0723264 | 170.942 | blue | -- |        |
| CN157754 | purple      | 226.36404 | 34.420117 | 0.9879351 | 0.0015879 | 21.17   | blue | -- | 99     |
| CN157783 | darkgreen   | 224.43794 | 20.740756 | 0.9601026 | 0.009509  | 15.13   | blue | -- |        |
| CN158088 | turquoise   | 1488.8465 | 1488.196  | 0.9885259 | 0.0014729 | 10.666  | blue | -- |        |
| CN158745 | blue        | 340.54296 | 154.9054  | 0.9948899 | 0.0004382 | 191.984 | blue | -- |        |
| CN160327 | turquoise   | 1448.9062 | 1448.4136 | 0.9792797 | 0.0035692 | 13.148  | blue | -- |        |
| CN162261 | turquoise   | 1398.8456 | 1398.362  | 0.9737158 | 0.0050951 | 18.182  | blue | -- |        |
| CN165338 | turquoise   | 1147.7516 | 1146.3137 | 0.928244  | 0.0228239 | 11.266  | blue | -- |        |
| AJ659652 | darkgreen   | 266.79146 | 23.93027  | 0.9953292 | 0.0003829 | 10.62   | blue | -- |        |
| CJ009624 | blue        | 314.63369 | 117.3299  | 0.9309083 | 0.0215735 | 8.656   | blue | -- |        |
| CJ022587 | blue        | 236.52263 | 108.32231 | 0.9137039 | 0.0300343 | 66.396  | blue | -- |        |
| CJ039813 | yellow      | 121.5933  | 46.570733 | 0.8149221 | 0.0928808 | 22.84   | blue | -- |        |
| DN100858 | brown       | 261.66395 | 124.03487 | 0.9859079 | 0.0020039 | 7.258   | blue | -- | 99     |
| DN100920 | greenyellow | 202.28097 | 21.804428 | 0.988073  | 0.0015608 | 19.002  | blue | -- |        |
| DN101483 | brown       | 262.11961 | 123.8465  | 0.9843752 | 0.002339  | 3.594   | blue | -- |        |
| DN101634 | blue        | 345.59535 | 150.95304 | 0.9888742 | 0.0014064 | 46.724  | blue | -- |        |
| DN103747 | brown       | 207.99658 | 99.521927 | 0.9334766 | 0.0203898 | 10.962  | blue | -- |        |
| DN106205 | brown       | 244.20266 | 102.19451 | 0.9346465 | 0.0198579 | 55.258  | blue | -- | 99     |
| DN107111 | blue        | 300.64262 | 142.85559 | 0.9762879 | 0.0043676 | 15.606  | blue | -- |        |
| DN107719 | brown       | 111.8274  | 58.766435 | 0.8258187 | 0.0849475 | 127.484 | blue | -- |        |
| DN107843 | turquoise   | 123.48544 | 82.503101 | 0.3109024 | 0.6106198 | 21.048  | blue | -- |        |
| DN109035 | blue        | 341.79246 | 141.72728 | 0.9748431 | 0.0047717 | 82.268  | blue | -- |        |
| DN109946 | blue        | 300.08343 | 144.30813 | 0.978575  | 0.0037524 | 8.882   | blue | -- |        |
| DN112403 | blue        | 315.84924 | 131.19405 | 0.9567158 | 0.0107396 | 25.292  | blue | -- | 0      |
| DN115147 | turquoise   | 1529.6161 | 1529.1633 | 0.9935409 | 0.0006225 | 10.62   | blue | -- |        |
| DN115959 | lightcyan   | 180.1688  | 7.5415078 | 0.3339279 | 0.5828692 | 7.666   | blue | -- | 0      |
| DN120378 | grey        | 284.78413 | 13.971588 | 0.8869952 | 0.0448205 | 26.69   | blue | -- |        |
| DN124126 | blue        | 300.14172 | 137.47621 | 0.967902  | 0.0068699 | 37.052  | blue | -- |        |
| DN125721 | brown       | 240.29075 | 118.84004 | 0.9789788 | 0.0036471 | 8.276   | blue | -- |        |
| DN126967 | turquoise   | 623.05952 | 619.47962 | 0.783406  | 0.1169943 | 1.636   | blue | -- |        |
| DN129644 | turquoise   | 1437.2268 | 1436.4838 | 0.9809149 | 0.0031559 | 3.456   | blue | -- |        |
| DN132970 | darkgreen   | 313.20679 | 22.860561 | 0.9924695 | 0.0007836 | 21.824  | blue | -- |        |
| BW957936 | blue        | 266.57508 | 114.36587 | 0.92629   | 0.0237554 | 2.774   | blue | -- | 99     |
| BW982846 | greenyellow | 201.68139 | 22.624055 | 0.9933572 | 0.0006493 | 20.654  | blue | -- |        |
| AJ949964 | brown       | 250.36619 | 120.98507 | 0.9788944 | 0.003669  | 0.274   | blue | -- |        |
| AJ956925 | red         | 279.25828 | 41.838923 | 0.941503  | 0.0168339 | 22.08   | blue | -- |        |
| AJ958642 | brown       | 164.32022 | 92.17831  | 0.9103561 | 0.0317825 | 54.132  | blue | -- |        |
| AJ962204 | magenta     | 316.26815 | 43.708837 | 0.9906596 | 0.0010821 | 23.66   | blue | -- |        |
| AJ943510 | turquoise   | 1563.8019 | 1563.3825 | 0.9990634 | 3.44E-05  | 3.274   | blue | -- | 0      |
| AJ944988 | blue        | 311.49416 | 143.94628 | 0.9779248 | 0.0039242 | 7.596   | blue | -- |        |

|          |             |           |           |           |           |         |      |    |    |
|----------|-------------|-----------|-----------|-----------|-----------|---------|------|----|----|
| AJ944603 | brown       | 226.185   | 119.09338 | 0.9783461 | 0.0038126 | 20.596  | blue | -- |    |
| CV876445 | brown       | 261.43289 | 123.45033 | 0.9854713 | 0.0020976 | 5.1     | blue | -- |    |
| DY410986 | magenta     | 315.80061 | 35.7469   | 0.9470766 | 0.0144986 | 12.076  | blue | -- |    |
| DY424272 | royalblue   | 195.65849 | 26.188104 | 0.9957268 | 0.0003351 | 5.534   | blue | -- |    |
| DY424635 | brown       | 322.15939 | 93.92699  | 0.9064373 | 0.0338686 | 17.502  | blue | -- | 0  |
| DY684916 | brown       | 179.44975 | 94.651096 | 0.9306322 | 0.021702  | 7.724   | blue | -- |    |
| CT863733 | brown       | 316.34478 | 94.893793 | 0.9040163 | 0.0351784 | 13.616  | blue | -- |    |
| DB803157 | greenyellow | 196.96358 | 22.817495 | 0.9756758 | 0.0045373 | 33.684  | blue | -- |    |
| DT321969 | brown       | 297.27329 | 110.54777 | 0.9539055 | 0.0117973 | 4.782   | blue | -- | 0  |
| DT324339 | brown       | 252.98859 | 125.44901 | 0.9896828 | 0.001256  | 9.312   | blue | -- |    |
| ES446999 | blue        | 269.99087 | 130.77817 | 0.956422  | 0.0108486 | 22.482  | blue | -- |    |
| EV857330 | brown       | 246.35374 | 129.70038 | 0.9991568 | 2.94E-05  | 13.762  | blue | -- |    |
| EW023671 | brown       | 265.31065 | 114.06801 | 0.9608476 | 0.009245  | 2.774   | blue | -- |    |
| EW074840 | blue        | 322.53893 | 156.75405 | 0.9974984 | 0.0001501 | 9.574   | blue | -- |    |
| EW083818 | brown       | 206.13457 | 91.890373 | 0.9135795 | 0.0300987 | 2.984   | blue | -- |    |
| EW087471 | blue        | 315.85518 | 153.28792 | 0.9924431 | 0.0007877 | 7.464   | blue | -- |    |
| EW091753 | turquoise   | 231.35744 | 217.88983 | 0.5583368 | 0.3279944 | 60.62   | blue | -- |    |
| EW093873 | brown       | 257.62232 | 124.68707 | 0.9890181 | 0.0013792 | 6.754   | blue | -- |    |
| EW112465 | royalblue   | 165.23884 | 23.82833  | 0.9739875 | 0.0050166 | 4.07    | blue | -- |    |
| EW130595 | darkgreen   | 229.78482 | 19.449722 | 0.9493961 | 0.0135608 | 3.628   | blue | -- |    |
| EW136988 | brown       | 246.50271 | 127.28781 | 0.9944264 | 0.0004991 | 19.844  | blue | -- |    |
| EW137538 | tan         | 238.37931 | 32.476433 | 0.9494463 | 0.0135408 | 2607.53 | blue | -- |    |
| EW146447 | tan         | 341.21265 | 37.531213 | 0.9768459 | 0.0042147 | 44.178  | blue | -- |    |
| EW155747 | darkgreen   | 308.96773 | 22.041818 | 0.9846472 | 0.0022783 | 75.742  | blue | -- |    |
| EW159788 | brown       | 190.11179 | 108.39955 | 0.9539691 | 0.011773  | 17.614  | blue | -- |    |
| EW167492 | brown       | 180.4887  | 98.874708 | 0.940703  | 0.0171784 | 7.038   | blue | -- |    |
| EW188932 | blue        | 311.1495  | 151.78681 | 0.9902369 | 0.0011563 | 19.254  | blue | -- |    |
| EW189192 | brown       | 142.65231 | 66.903632 | 0.8539289 | 0.0655282 | 19.57   | blue | -- |    |
| EW191982 | brown       | 247.75134 | 122.50497 | 0.9834288 | 0.0025544 | 3.514   | blue | -- |    |
| EW192633 | brown       | 250.75782 | 124.84429 | 0.9892765 | 0.0013309 | 4.216   | blue | -- |    |
| EW196387 | brown       | 336.56266 | 78.212845 | 0.8526676 | 0.0663656 | 6.33    | blue | -- |    |
| EW201887 | brown       | 260.04146 | 128.69912 | 0.9952708 | 0.0003901 | 8.12    | blue | -- |    |
| EW205590 | turquoise   | 153.11761 | 81.663749 | 0.2223707 | 0.7192198 | 40.778  | blue | -- |    |
| EW206037 | brown       | 236.99242 | 120.50788 | 0.9811666 | 0.0030938 | 4.664   | blue | -- |    |
| EW212556 | blue        | 262.95127 | 119.74219 | 0.9369746 | 0.018813  | 21.326  | blue | -- |    |
| EW244600 | magenta     | 278.7946  | 34.329013 | 0.9376575 | 0.01851   | 55.084  | blue | -- |    |
| EW244903 | blue        | 318.40002 | 155.35841 | 0.9954709 | 0.0003656 | 15.31   | blue | -- |    |
| EW247940 | brown       | 228.31106 | 124.07238 | 0.9887254 | 0.0014347 | 9.866   | blue | -- |    |
| EW249284 | brown       | 253.37941 | 129.42086 | 0.9972033 | 0.0001775 | 3.47    | blue | -- |    |
| EW310470 | brown       | 154.55768 | 90.164538 | 0.9055076 | 0.0343697 | 2.694   | blue | -- |    |
| EW322856 | brown       | 172.26734 | 91.061967 | 0.9077414 | 0.0331697 | 10.148  | blue | -- |    |
| EW332614 | turquoise   | 1515.7317 | 1515.3208 | 0.9900946 | 0.0011817 | 2.094   | blue | -- | 99 |
| EW334411 | turquoise   | 176.50278 | 71.508509 | 0.1870116 | 0.7632847 | 12.454  | blue | -- |    |
| EW359956 | brown       | 243.05897 | 129.09843 | 0.9977287 | 0.0001299 | 6.334   | blue | -- |    |
| EW363654 | royalblue   | 164.51255 | 24.01654  | 0.9746762 | 0.0048191 | 4.754   | blue | -- |    |
| EW407282 | blue        | 312.69566 | 146.0845  | 0.9816117 | 0.002985  | 28.038  | blue | -- |    |
| EW417768 | brown       | 251.81178 | 127.68159 | 0.9953816 | 0.0003765 | 10.086  | blue | -- |    |
| EW453494 | brown       | 272.90858 | 126.61897 | 0.9888157 | 0.0014175 | 4.398   | blue | -- |    |

|          |             |           |           |           |           |         |      |    |    |
|----------|-------------|-----------|-----------|-----------|-----------|---------|------|----|----|
| EW470987 | lightcyan   | 226.28433 | 18.438948 | 0.8964565 | 0.0393691 | 22.354  | blue | -- |    |
| EW483255 | navy        | 151.42445 | 16.579301 | 0.8264355 | 0.084505  | 0.664   | blue | -- |    |
| EW519341 | brown       | 236.45858 | 129.44672 | 0.9995387 | 1.19E-05  | 33.396  | blue | -- |    |
| EW521970 | brown       | 254.71771 | 129.82197 | 0.9981956 | 9.20E-05  | 12.6    | blue | -- |    |
| EW548211 | brown       | 204.75052 | 118.16216 | 0.9769652 | 0.0041822 | 10.562  | blue | -- |    |
| EW572865 | brown       | 264.41687 | 128.12052 | 0.9935519 | 0.000621  | 162.468 | blue | -- | 99 |
| EW576918 | turquoise   | 476.23876 | 461.92216 | 0.7070009 | 0.1817854 | 56.846  | blue | -- |    |
| EW577626 | brown       | 243.64883 | 125.51644 | 0.9901958 | 0.0011636 | 9.46    | blue | -- |    |
| EW588646 | brown       | 258.44322 | 129.13045 | 0.9960878 | 0.0002936 | 11.696  | blue | -- |    |
| EW594177 | turquoise   | 150.24602 | 138.9946  | 0.4790994 | 0.414206  | 0.998   | blue | -- |    |
| EW603701 | blue        | 318.98105 | 139.79351 | 0.9715566 | 0.0057338 | 7.144   | blue | -- |    |
| EW621683 | brown       | 245.51607 | 129.79972 | 0.9992501 | 2.46E-05  | 10.638  | blue | -- |    |
| EW664676 | blue        | 260.43839 | 125.78137 | 0.947117  | 0.0144822 | 16.19   | blue | -- |    |
| EW670598 | royalblue   | 237.89998 | 23.074848 | 0.9669989 | 0.0071609 | 21.662  | blue | -- |    |
| BE030540 | magenta     | 288.48277 | 37.247188 | 0.9554189 | 0.0112237 | 6.304   | blue | -- |    |
| BE233268 | brown       | 282.9881  | 106.89371 | 0.9401601 | 0.0174134 | 4.786   | blue | -- |    |
| BG896003 | brown       | 276.13403 | 122.71584 | 0.9818363 | 0.0029306 | 10.628  | blue | -- |    |
| BQ599187 | brown       | 198.43594 | 105.3165  | 0.9463539 | 0.014795  | 6.576   | blue | -- |    |
| BQ601250 | greenyellow | 177.45028 | 22.451258 | 0.9861037 | 0.0019623 | 8.732   | blue | -- |    |
| BI399871 | brown       | 249.34061 | 126.94623 | 0.9929076 | 0.0007163 | 10.162  | blue | -- |    |
| BQ597564 | greenyellow | 185.4114  | 22.509569 | 0.971464  | 0.0057618 | 10.262  | blue | -- |    |
| BI181083 | brown       | 223.43437 | 124.43599 | 0.9897633 | 0.0012414 | 9.148   | blue | -- | 99 |
| BI184747 | turquoise   | 160.14483 | 113.253   | 0.335049  | 0.581524  | 77.348  | blue | -- |    |
| BI181508 | turquoise   | 1510.9799 | 1510.5698 | 0.9904147 | 0.0011249 | 2.748   | blue | -- | 99 |
| BQ604024 | greenyellow | 146.15289 | 19.243153 | 0.938039  | 0.0183414 | 5.694   | blue | -- |    |
| BM190542 | brown       | 259.14389 | 129.07085 | 0.9961119 | 0.0002909 | 12.012  | blue | -- |    |



Table S7-2. Module eigengene and its evolutionary rates in five prenatal highly LT-specific modules (LT\_darkred).

| pig_Genebank   | pig_Gene | LDEModule     | kTotal   | kWithin  | eigencorr | eigenpval | mean   | LT      | Ka/Ks  |
|----------------|----------|---------------|----------|----------|-----------|-----------|--------|---------|--------|
|                |          |               |          |          |           |           | Expr   | Module  |        |
| NM_001044548.1 | INTN1    | blue          | 297.0833 | 140.6561 | 0.972952  | 0.005318  | 17.346 | darkred | 0      |
| NM_001044606.1 | ATP5O    | magenta       | 333.135  | 43.79341 | 0.991024  | 0.001019  | 144.15 | darkred | 0.1786 |
| AK231033.1     | MAPKSP1  | blue          | 326.3434 | 113.4681 | 0.923579  | 0.025067  | 22.608 | darkred | 0      |
| AK232289.1     | NOL7     | greenyellow   | 218.8315 | 21.40189 | 0.983842  | 0.00246   | 12.222 | darkred | --     |
| AK235604.1     | CMTM3    | lightcyan     | 202.6861 | 6.436603 | 0.261776  | 0.670543  | 33.82  | darkred | --     |
| AK238860.1     | RPF1     | turquoise     | 119.3662 | 44.7817  | 0.087672  | 0.888515  | 58.664 | darkred | --     |
| AK236086.1     | ALKBH5   | grey          | 315.4755 | 17.24843 | 0.967176  | 0.007103  | 79.31  | darkred | --     |
| AK230619.1     | PSMA2    | purple        | 160.9621 | 27.64482 | 0.92814   | 0.022873  | 211.14 | darkred | 99     |
| AK236420.1     | RRAGD    | lightyellow   | 298.5297 | 23.74369 | 0.977006  | 0.004171  | 11.102 | darkred | 0      |
| AK236617.1     | G3BP2    | tan           | 320.6253 | 38.44607 | 0.983132  | 0.002623  | 31.808 | darkred | 99     |
| XM_001925875.1 | TPD52    | yellow        | 131.7131 | 58.58274 | 0.897157  | 0.038974  | 55.446 | darkred | 0      |
| XM_001926913.1 | POLR1D   | blue          | 345.1107 | 146.6876 | 0.98223   | 0.002836  | 81.41  | darkred | 0      |
| XM_001925382.1 | MRPL43   | blue          | 322.5901 | 130.1057 | 0.9556    | 0.011156  | 23.184 | darkred | --     |
| XM_001925458.1 | FAM21A   | brown         | 145.0148 | 71.98678 | 0.84294   | 0.072933  | 11.906 | darkred | 0.5382 |
| BX665103       |          | greenyellow   | 235.0703 | 20.23032 | 0.938163  | 0.018287  | 40.664 | darkred | --     |
| BX665955       |          | brown         | 279.5568 | 117.322  | 0.970932  | 0.005923  | 6.566  | darkred | 99     |
| BX675385       |          | blue          | 340.0489 | 157.4072 | 0.998373  | 7.88E-05  | 5.376  | darkred | --     |
| CK451664       |          | blue          | 257.1589 | 116.625  | 0.932339  | 0.020912  | 71.426 | darkred | --     |
| CK454516       |          | royalblue     | 209.4712 | 25.85391 | 0.993263  | 0.000663  | 5.85   | darkred | --     |
| CK464065       |          | yellow        | 99.67795 | 42.60602 | 0.794768  | 0.108108  | 125.26 | darkred | --     |
| BX921473       |          | purple        | 174.6442 | 27.51044 | 0.931203  | 0.021436  | 2.656  | darkred | --     |
| CN157594       |          | brown         | 322.4954 | 101.4193 | 0.923754  | 0.024982  | 20.452 | darkred | --     |
| CN161590       |          | turquoise     | 1534.085 | 1533.56  | 0.994954  | 0.00043   | 5.248  | darkred | --     |
| DN120090       |          | blue          | 318.3672 | 146.5824 | 0.982169  | 0.002851  | 18.91  | darkred | --     |
| AJ948107       |          | purple        | 76.21353 | 5.652905 | 0.532425  | 0.355647  | 1.612  | darkred | --     |
| DR120938       |          | blue          | 318.4968 | 155.8417 | 0.996066  | 0.000296  | 28.778 | darkred | --     |
| CV875565       |          | turquoise     | 120.4862 | 103.4161 | 0.416429  | 0.485536  | 4.124  | darkred | --     |
| DY437498       |          | darkturquoise | 146.4519 | 15.21459 | 0.954126  | 0.011713  | 16.398 | darkred | 99     |
| EB684343       |          | blue          | 352.518  | 128.945  | 0.952505  | 0.012336  | 83.21  | darkred | --     |
| DB786707       |          | blue          | 312.6502 | 140.9349 | 0.973474  | 0.005165  | 11.496 | darkred | --     |
| AK236389       | EPHX1    | blue          | 339.0518 | 150.6831 | 0.988386  | 0.0015    | 13.328 | darkred | 0.1916 |
| DT321372       |          | turquoise     | 557.201  | 553.6229 | 0.757947  | 0.137647  | 2.992  | darkred | --     |
| EV873382       |          | yellow        | 311.1789 | 57.24785 | 0.87106   | 0.054492  | 26.268 | darkred | --     |
| EW281140       |          | blue          | 300.6658 | 131.3314 | 0.956686  | 0.01075   | 753.84 | darkred | --     |
| EW430131       |          | navy          | 270.3831 | 32.86976 | 0.984972  | 0.002206  | 26.046 | darkred | --     |
| EW520628       |          | darkred       | 62.86005 | 11.88912 | 0.909178  | 0.032405  | 34.334 | darkred | --     |
| EW567071       |          | turquoise     | 34.30398 | 24.46049 | 0.161854  | 0.794824  | 27.974 | darkred | --     |
| BG385044       |          | yellow        | 297.5939 | 72.49647 | 0.944403  | 0.015605  | 31.402 | darkred | --     |
| BF080208       |          |               |          |          |           |           |        | darkred | --     |
| BI185477       |          | red           | 244.4728 | 42.084   | 0.945668  | 0.015078  | 5.082  | darkred | 0      |
| CA780055       |          | lightcyan     | 271.5258 | 22.52244 | 0.954638  | 0.011518  | 19.592 | darkred | --     |

Table S7-3. Module eigengene and its evolutionary rates in five prenatal highly LT-specific modules (LT\_only\_turquoise).

| pig_Gene | pig_Gene | kTotal    | kWithin   | eigencorr | eigenpval | meanExpr | LTModule  | Ka/Ks  |
|----------|----------|-----------|-----------|-----------|-----------|----------|-----------|--------|
| XM_00192 | LTA4H    | 1313.2006 | 1312.6078 | 0.9534027 | 0.0119899 | 3.936    | turquoise | 0      |
| AY166682 | TMBIM6   | 224.59407 | 35.259588 | 0.9888177 | 0.0014171 | 27.744   | turquoise | --     |
| NM_21442 | CYP11A1  | 1052.6105 | 1051.5399 | 0.9001052 | 0.0373277 | 13.586   | turquoise | --     |
| AY610411 | TPRKB    | 187.08178 | 48.624279 | 0.9814416 | 0.0030264 | 84.108   | turquoise | 0      |
| AY825267 | ABCB1    | 131.09108 | 35.186501 | 0.9085637 | 0.0327313 | 13.95    | turquoise | 0.1414 |
| NM_21375 | STAR     | 205.85748 | 51.762488 | 0.9952051 | 0.0003983 | 10.256   | turquoise | 99     |
| AU298693 |          | 328.07076 | 42.969476 | 0.9846293 | 0.0022823 | 103.902  | turquoise | --     |
| BX675384 |          | 201.69581 | 22.910172 | 0.9867411 | 0.0018291 | 8.424    | turquoise | --     |
| BX675925 |          | 199.63297 | 99.966213 | 0.9428554 | 0.0162569 | 19.694   | turquoise | --     |
| BX926015 |          | 85.761236 | 7.5093144 | 0.3958671 | 0.5094592 | 2.688    | turquoise | --     |
| CN164380 |          | 229.01771 | 105.08113 | 0.9479778 | 0.0141318 | 4.17     | turquoise | --     |
| DN118117 |          | 318.49676 | 155.84171 | 0.9960664 | 0.000296  | 28.778   | turquoise | --     |
| EW169810 |          | 120.4862  | 103.41614 | 0.4164294 | 0.4855356 | 4.124    | turquoise | --     |
| EW240620 |          | 146.45189 | 15.21459  | 0.9541262 | 0.011713  | 16.398   | turquoise | --     |
| EW421594 |          | 352.51804 | 128.945   | 0.9525051 | 0.0123363 | 83.21    | turquoise | 99     |

Table S7-4. Module eigengene and its evolutionary rates in five prenatal highly LT-specific modules (LT\_purple).

| pig_Genebank   | pig_Gene | LDE          | kTotal    | kWithin   | eigencorr | eigenpval | meanExpr | LT     |       |
|----------------|----------|--------------|-----------|-----------|-----------|-----------|----------|--------|-------|
|                |          | Module       |           |           |           |           |          | Module | Ka/Ks |
| NM_001044527.1 | ENO3     | green        | 241.36404 | 53.77627  | 0.989651  | 0.001262  | 428.998  | purple | 0     |
| NM_001044594.1 | MYOZ3    | green        | 221.29959 | 47.242311 | 0.940534  | 0.017251  | 21.02    | purple | --    |
| NM_001044616.1 | NRAP     | pink         | 194.85748 | 44.968614 | 0.985195  | 0.002158  | 21.004   | purple | 0.117 |
| AK237414.1     | PTP4A3   | midnightblue | 229.84127 | 36.508053 | 0.996251  | 0.000275  | 101.384  | purple | --    |
| AK238056.1     |          | midnightblue | 240.15671 | 37.116479 | 0.999506  | 1.32E-05  | 19.294   | purple | --    |
| AK231783.1     | PDLIM3   | midnightblue | 209.63159 | 32.248573 | 0.970883  | 0.005938  | 68.094   | purple | 0     |
| AK238516.1     | ITIH5    | lightcyan    | 269.79797 | 22.788062 | 0.941017  | 0.017043  | 53.16    | purple | 0.412 |
| AK238595.1     | MALAT1   | green        | 167.73067 | 34.570212 | 0.893264  | 0.041183  | 11.114   | purple | --    |
| AK236532.1     | RPS6KA3  | green        | 104.07577 | 28.504252 | 0.835992  | 0.077741  | 39.638   | purple | 0     |
| AK232843.1     | GPD1     | midnightblue | 164.04493 | 28.786626 | 0.9464    | 0.014776  | 3.086    | purple | 0     |
| AK239600.1     | DCI      | grey60       | 268.49997 | 32.709955 | 0.994818  | 0.000447  | 24.166   | purple | --    |
| AK239646.1     | HADHB    | navy         | 247.71996 | 30.132073 | 0.96408   | 0.008128  | 83.924   | purple | 0     |
| AK239858.1     | CD99     | yellow       | 221.78598 | 60.268196 | 0.910706  | 0.031598  | 171.656  | purple | --    |
| AK233342.1     | SLC6A12  | midnightblue | 203.24666 | 33.49299  | 0.977947  | 0.003918  | 6.814    | purple | 0     |
| AK233419.1     | SLC25A4  | midnightblue | 251.57336 | 35.606469 | 0.990835  | 0.001052  | 232.884  | purple | 0     |
| AK236976.1     | PPP1R3B  | midnightblue | 264.71674 | 30.850524 | 0.959952  | 0.009563  | 16.28    | purple | 0.087 |
| AK240262.1     | CLEC3B   | green        | 153.30118 | 31.769604 | 0.857884  | 0.062924  | 28.772   | purple | --    |
| AK237272.1     | HSPB6    | green        | 229.92393 | 53.270586 | 0.982111  | 0.002865  | 154.294  | purple | --    |
| NM_213946.2    | FHL3     | grey         | 273.65615 | 12.269239 | 0.816903  | 0.091423  | 50.504   | purple | --    |
| NM_001097516.1 | SDHD     | turquoise    | 1519.8096 | 1519.4059 | 0.99088   | 0.001044  | 3.378    | purple | 0.491 |
| NM_001109945.1 | CDH13    | turquoise    | 1502.9416 | 1502.5711 | 0.988217  | 0.001533  | 2.378    | purple | 0.053 |
| NM_001128433.1 | SLC2A4   | red          | 181.42021 | 47.839103 | 0.977446  | 0.004052  | 26.03    | purple | --    |
| XM_001927804.1 | NDUFB9   | pink         | 183.62776 | 38.79323  | 0.95279   | 0.012226  | 136.806  | purple | 0     |
| XM_001928966.1 | CASQ1    | red          | 178.13503 | 47.208159 | 0.974381  | 0.004903  | 43.322   | purple | 0     |
| XM_001929660.1 | SEMA6C   | green        | 190.45898 | 51.702221 | 0.989103  | 0.001363  | 41.324   | purple | 0.196 |
| XM_001927213.1 | ANKRD28  | turquoise    | 1294.4525 | 1293.8259 | 0.953462  | 0.011967  | 23.146   | purple | 0     |
| XM_001926917.1 | PLXND1   | midnightblue | 193.88712 | 33.7288   | 0.979207  | 0.003588  | 108.794  | purple | 0.03  |
| XM_001927272.1 | ACTN2    | pink         | 248.98847 | 45.260147 | 0.984763  | 0.002253  | 652.286  | purple | 0     |
| XM_001929322.1 | ANK3     | pink         | 200.03273 | 43.540449 | 0.97872   | 0.003714  | 72.954   | purple | 0.136 |
| XM_001928874.1 | SNTA1    | midnightblue | 236.14427 | 34.870391 | 0.986448  | 0.00189   | 12.122   | purple | 0     |
| XM_001929063.1 | MAFB     | red          | 144.09108 | 39.135852 | 0.93091   | 0.021573  | 35.88    | purple | --    |
| NM_213928.1    | GOT2     | turquoise    | 1493.0281 | 1492.6094 | 0.98608   | 0.001967  | 12.082   | purple | 0.078 |
| NM_213954.1    | ACO2     | navy         | 253.27162 | 31.694912 | 0.977444  | 0.004053  | 41.276   | purple | 0     |
| NM_214213.1    | PLN      | midnightblue | 223.00568 | 36.446624 | 0.995808  | 0.000326  | 9.668    | purple | --    |
| NM_213855.1    | MYH7     | grey         | 200.03233 | 12.036919 | 0.805759  | 0.099717  | 623.904  | purple | 0     |
| NM_214136.1    | MYH2     | red          | 232.58535 | 50.4905   | 0.989954  | 0.001207  | 18.784   | purple | 0     |
| BX673614       |          | green        | 215.62735 | 50.583426 | 0.969286  | 0.006432  | 22.06    | purple | --    |
| BP168899       |          | turquoise    | 1570.9326 | 1570.5358 | 0.999793  | 3.56E-06  | 2.716    | purple | 0     |
| CK463858       |          | greenyellow  | 88.310184 | 5.1841377 | -0.341433 | 0.573874  | 78.988   | purple | --    |
| BX920496       |          | red          | 201.39973 | 50.51983  | 0.990002  | 0.001198  | 2.12     | purple | 0     |
| BX924065       |          | red          | 206.21917 | 51.051459 | 0.992381  | 0.000797  | 25.374   | purple | --    |
| BX926893       |          | green        | 154.5316  | 42.800047 | 0.931367  | 0.021361  | 41.124   | purple | --    |
| CN156156       |          | navy         | 207.87142 | 27.795967 | 0.950561  | 0.013098  | 10.44    | purple | --    |
| CN156511       |          | turquoise    | 759.08699 | 756.4775  | 0.819666  | 0.0894    | 9.598    | purple | 99    |

|          |              |           |           |          |          |         |        |       |
|----------|--------------|-----------|-----------|----------|----------|---------|--------|-------|
| CN157450 | turquoise    | 1313.2006 | 1312.6078 | 0.953403 | 0.01199  | 3.936   | purple | 0     |
| CN162187 | midnightblue | 224.59407 | 35.259588 | 0.988818 | 0.001417 | 27.744  | purple | 0     |
| CN162365 | turquoise    | 1052.6105 | 1051.5399 | 0.900105 | 0.037328 | 13.586  | purple | 0     |
| DN113717 | green        | 187.08178 | 48.624279 | 0.981442 | 0.003026 | 84.108  | purple | --    |
| AJ947734 | red          | 131.09108 | 35.186501 | 0.908564 | 0.032731 | 13.95   | purple | --    |
| AJ961806 | red          | 205.85748 | 51.762488 | 0.995205 | 0.000398 | 10.256  | purple | --    |
| DV226293 | green        | 239.19398 | 51.37013  | 0.983492 | 0.00254  | 18.336  | purple | 0     |
| DV227364 | turquoise    | 161.37245 | 139.04102 | 0.464779 | 0.430281 | 7.414   | purple | --    |
| DY405382 | midnightblue | 228.85453 | 35.096389 | 0.98779  | 0.001617 | 112.296 | purple | 0     |
| DY437756 | lightcyan    | 286.57469 | 27.075539 | 0.998759 | 5.25E-05 | 21.308  | purple | 99    |
| DB805355 | midnightblue | 249.30531 | 36.531184 | 0.996135 | 0.000288 | 14.2    | purple | 0     |
| DT320474 | turquoise    | 119.73692 | 85.690135 | 0.318672 | 0.60123  | 1.334   | purple | --    |
| DT325394 | turquoise    | 1536.2533 | 1535.8493 | 0.993277 | 0.000661 | 5.436   | purple | 0.214 |
| DT328391 | turquoise    | 1544.2644 | 1543.8592 | 0.994949 | 0.000431 | 4.678   | purple | 0     |
| DT331413 | red          | 202.51883 | 48.41159  | 0.980266 | 0.003318 | 11.87   | purple | --    |
| EW088403 | red          | 266.65463 | 47.167965 | 0.970283 | 0.006122 | 94.282  | purple | --    |
| EW132770 | grey60       | 265.12374 | 32.565253 | 0.993788 | 0.000587 | 78.852  | purple | --    |
| EW142807 | turquoise    | 873.33005 | 871.53257 | 0.860323 | 0.061335 | 9.81    | purple | 99    |
| EW241468 | green        | 145.43487 | 36.901154 | 0.903744 | 0.035327 | 17.814  | purple | --    |
| EW362700 | midnightblue | 260.67859 | 32.420281 | 0.970941 | 0.00592  | 93.876  | purple | --    |
| EW366014 | green        | 267.48117 | 46.61252  | 0.946158 | 0.014876 | 18.514  | purple | --    |
| EW633584 | red          | 192.96338 | 47.371267 | 0.976259 | 0.004376 | 35.772  | purple | 0.725 |
| EW675702 | green        | 196.82198 | 50.257772 | 0.966981 | 0.007167 | 17.716  | purple | --    |
| BF190620 | red          | 228.19632 | 50.637891 | 0.989303 | 0.001326 | 3.036   | purple | --    |
| BI346349 | green        | 253.24049 | 50.080944 | 0.957932 | 0.010292 | 74.176  | purple | --    |

Table S7-5. Module eigengene and its evolutionary rates in five prenatal highly LT-specific modules (LT\_yellowgreen).

| pig_Genebank   | pig_Gene | LDEModule    | kTotal | kWithin | eigenc |           | mean   |             | LTModule | Ka/Ks |
|----------------|----------|--------------|--------|---------|--------|-----------|--------|-------------|----------|-------|
|                |          |              |        |         | orr    | eigenpval | Expr   |             |          |       |
| DQ508264.1     | PYGM     | green        | 127.1  | 18.0861 | 0.7305 | 0.160949  | 1.25   | yellowgreen | 0.0327   |       |
| AK240563.1     | DAG1     | grey         | 278.9  | 16.1809 | 0.9419 | 0.016651  | 72.038 | yellowgreen | --       |       |
| XM_001924280.1 | SNTB1    | salmon       | 96.33  | 18.2177 | 0.863  | 0.059616  | 26.326 | yellowgreen | 0.0986   |       |
| XM_001925133.1 | ACIN1    | blue         | 346    | 149.203 | 0.9858 | 0.002028  | 66.896 | yellowgreen | 0.4614   |       |
| XM_001929585.1 | HSPB8    | green        | 226.5  | 49.9531 | 0.9735 | 0.00517   | 40.122 | yellowgreen | --       |       |
| XM_001929468.1 | CHCHD10  | green        | 262.5  | 50.4352 | 0.9701 | 0.006181  | 31.734 | yellowgreen | --       |       |
| XM_001929645.1 | DGCR8    | turquoise    | 1337   | 1336.45 | 0.9637 | 0.008245  | 8.978  | yellowgreen | 0.1729   |       |
| XM_001927848.1 | MED12    | turquoise    | 419.8  | 414.505 | 0.6859 | 0.201106  | 38.478 | yellowgreen | 0.0701   |       |
| NM_001032359.1 | TNNI2    | green        | 218.7  | 52.432  | 0.9792 | 0.003584  | 72.186 | yellowgreen | --       |       |
| BX667460       |          | navy         | 253.9  | 31.8617 | 0.9795 | 0.003523  | 101.39 | yellowgreen | --       |       |
| BX667493       |          | pink         | 182.5  | 43.0254 | 0.9752 | 0.004669  | 24.436 | yellowgreen | 0        |       |
| BX916417       |          | red          | 232.1  | 51.6131 | 0.9942 | 0.00053   | 18.122 | yellowgreen | --       |       |
| CJ014614       |          | midnightblue | 209.6  | 32.302  | 0.9712 | 0.005847  | 9.656  | yellowgreen | --       |       |
| DN111814       |          |              |        |         |        |           |        | yellowgreen | --       |       |
| DN132764       |          | lightyellow  | 282.2  | 24.1293 | 0.9686 | 0.006656  | 47.506 | yellowgreen | --       |       |
| BW978477       |          | turquoise    | 1547   | 1547.02 | 0.9967 | 0.000224  | 3.07   | yellowgreen | 0        |       |
| AJ950525       |          | black        | 170.8  | 24.3766 | 0.8531 | 0.066089  | 150.35 | yellowgreen | --       |       |
| DV901297       |          | red          | 176.1  | 46.6156 | 0.972  | 0.00559   | 5.2    | yellowgreen | --       |       |
| CV875164       |          | turquoise    | 467.2  | 462.542 | 0.7096 | 0.179478  | 15.448 | yellowgreen | --       |       |
| CX064239       |          | turquoise    | 1168   | 1166.82 | 0.925  | 0.024354  | 13.266 | yellowgreen | --       |       |
| BI182545       |          | turquoise    | 1283   | 1282.26 | 0.9471 | 0.014489  | 10.258 | yellowgreen | --       |       |
| BI184076       |          | turquoise    | 951.1  | 949.36  | 0.8739 | 0.052706  | 8.984  | yellowgreen | --       |       |

Table S8-1. GO annotation analysis of the module eigengene in six prenatal highly LDE-specific modules (LDE\_blue).

| GO ID      | GO Name                                                | Total Count | Diff Count | P Value   | FDR       | Gene                     |
|------------|--------------------------------------------------------|-------------|------------|-----------|-----------|--------------------------|
| GO:0006412 | translation                                            | 130         | 3          | 0.0009699 | 0.1134748 | [AARSD1, MRPL43, MRPL52] |
| GO:0045657 | positive regulation of monocyte differentiation        | 1           | 1          | 0.001481  | 0.0266582 | [ACIN1]                  |
| GO:0046325 | negative regulation of glucose import                  | 1           | 1          | 0.001481  | 0.0266582 | [PEA15]                  |
| GO:0048239 | negative regulation of DNA recombination at telomere   | 1           | 1          | 0.001481  | 0.0266582 | [TERF2IP]                |
| GO:0042637 | catagen                                                | 1           | 1          | 0.001481  | 0.0266582 | [TGFB2]                  |
| GO:0050655 | dermatan sulfate proteoglycan metabolic process        | 1           | 1          | 0.001481  | 0.0266582 | [CHST14]                 |
| GO:0045823 | positive regulation of heart contraction               | 1           | 1          | 0.001481  | 0.0266582 | [TGFB2]                  |
| GO:0045932 | negative regulation of muscle contraction              | 1           | 1          | 0.001481  | 0.0266582 | [TNNT1]                  |
| GO:0051795 | positive regulation of catagen                         | 1           | 1          | 0.001481  | 0.0266582 | [TGFB2]                  |
| GO:0048103 | somatic stem cell division                             | 1           | 1          | 0.001481  | 0.0266582 | [TGFB2]                  |
| GO:0006517 | protein deglycosylation                                | 1           | 1          | 0.001481  | 0.0266582 | [AGA]                    |
| GO:0060998 | regulation of dendritic spine development              | 2           | 1          | 0.0029599 | 0.0203708 | [ARF6]                   |
| GO:0019439 | aromatic compound catabolic process                    | 2           | 1          | 0.0029599 | 0.0203708 | [EPHX1]                  |
| GO:0060038 | cardiac muscle cell proliferation                      | 2           | 1          | 0.0029599 | 0.0203708 | [TGFB2]                  |
| GO:0010002 | cardioblast differentiation                            | 2           | 1          | 0.0029599 | 0.0203708 | [TGFB2]                  |
| GO:0035020 | regulation of Rac protein signal transduction          | 2           | 1          | 0.0029599 | 0.0203708 | [ARF6]                   |
| GO:0071786 | endoplasmic reticulum tubular network organization     | 2           | 1          | 0.0029599 | 0.0203708 | [RTN3]                   |
| GO:0048261 | negative regulation of receptor-mediated endocytosis   | 2           | 1          | 0.0029599 | 0.0203708 | [ARF6]                   |
| GO:0000052 | citrulline metabolic process                           | 2           | 1          | 0.0029599 | 0.0203708 | [DDAH2]                  |
| GO:0050778 | positive regulation of immune response                 | 2           | 1          | 0.0029599 | 0.0203708 | [TGFB2]                  |
| GO:0051891 | positive regulation of cardioblast differentiation     | 2           | 1          | 0.0029599 | 0.0203708 | [TGFB2]                  |
| GO:0031848 | protection from non-homologous end joining at telomere | 2           | 1          | 0.0029599 | 0.0203708 | [TERF2IP]                |
| GO:0042981 | regulation of apoptotic process                        | 65          | 2          | 0.00423   | 0.0215179 | [CTSB, PEA15]            |
| GO:0010833 | telomere maintenance via telomere lengthening          | 3           | 1          | 0.0044366 | 0.0203559 | [TERF2IP]                |
| GO:0030263 | apoptotic chromosome condensation                      | 3           | 1          | 0.0044366 | 0.0203559 | [ACIN1]                  |
| GO:0042416 | dopamine biosynthetic process                          | 3           | 1          | 0.0044366 | 0.0203559 | [TGFB2]                  |
| GO:0045919 | positive regulation of cytolysis                       | 3           | 1          | 0.0044366 | 0.0203559 | [RRAGA]                  |
| GO:0006457 | protein folding                                        | 68          | 2          | 0.0046195 | 0.0193029 | [DNAJB6, PPID]           |
| GO:0046683 | response to organophosphorus                           | 4           | 1          | 0.0059111 | 0.0223096 | [TYMS]                   |
| GO:0032205 | negative regulation of telomere maintenance            | 4           | 1          | 0.0059111 | 0.0223096 | [TERF2IP]                |
| GO:0048268 | clathrin coat assembly                                 | 4           | 1          | 0.0059111 | 0.0223096 | [AP2S1]                  |

|                                                                                  |     |   |           |           |                      |
|----------------------------------------------------------------------------------|-----|---|-----------|-----------|----------------------|
| GO:0070389 chaperone cofactor-dependent protein refolding                        | 4   | 1 | 0.0059111 | 0.0223096 | [PTGES3]             |
| GO:0003009 skeletal muscle contraction                                           | 4   | 1 | 0.0059111 | 0.0223096 | [TNNT1]              |
| GO:0006916 anti-apoptosis                                                        | 84  | 2 | 0.0069625 | 0.0239592 | [DDAH2, PEA15]       |
| GO:0031069 hair follicle morphogenesis                                           | 5   | 1 | 0.0073835 | 0.0239963 | [TGFB2]              |
| GO:0045109 intermediate filament organization                                    | 5   | 1 | 0.0073835 | 0.0239963 | [DNAJB6]             |
| GO:0048699 generation of neurons                                                 | 5   | 1 | 0.0073835 | 0.0239963 | [TGFB2]              |
| GO:0051489 regulation of filopodium assembly                                     | 6   | 1 | 0.0088537 | 0.0265612 | [ARF6]               |
| GO:0010569 regulation of double-strand break repair via homologous recombination | 6   | 1 | 0.0088537 | 0.0265612 | [TERF2IP]            |
| GO:0050777 negative regulation of immune response                                | 6   | 1 | 0.0088537 | 0.0265612 | [TGFB2]              |
| GO:0031529 ruffle organization                                                   | 7   | 1 | 0.0103218 | 0.0274467 | [ARF6]               |
| GO:0048666 neuron development                                                    | 7   | 1 | 0.0103218 | 0.0274467 | [TGFB2]              |
| GO:0043525 positive regulation of neuron apoptosis                               | 7   | 1 | 0.0103218 | 0.0274467 | [TGFB2]              |
| GO:0006401 RNA catabolic process                                                 | 7   | 1 | 0.0103218 | 0.0274467 | [RNASEH2C]           |
| GO:0030866 cortical actin cytoskeleton organization                              | 7   | 1 | 0.0103218 | 0.0274467 | [ARF6]               |
| GO:0019048 virus-host interaction                                                | 7   | 1 | 0.0103218 | 0.0274467 | [RRAGA]              |
| GO:0034614 cellular response to reactive oxygen species                          | 7   | 1 | 0.0103218 | 0.0274467 | [PRDX5]              |
| GO:0006950 response to stress                                                    | 104 | 2 | 0.0104964 | 0.0253213 | [AKR1B1, RTN3]       |
| GO:0016192 vesicle-mediated transport                                            | 104 | 2 | 0.0104964 | 0.0253213 | [ARF6, RTN3]         |
| GO:0044419 interspecies interaction between organisms                            | 315 | 3 | 0.0115241 | 0.0269665 | [PSMB4, RRAGA, RTN3] |
| GO:0001942 hair follicle development                                             | 8   | 1 | 0.0117878 | 0.02678   | [TGFB2]              |
| GO:0071230 cellular response to amino acid stimulus                              | 8   | 1 | 0.0117878 | 0.02678   | [RRAGA]              |
| GO:0006915 apoptotic process                                                     | 321 | 3 | 0.0121215 | 0.0267587 | [NTN1, RRAGA, RTN3]  |
| GO:0030100 regulation of endocytosis                                             | 9   | 1 | 0.0132516 | 0.0279358 | [AP2S1]              |
| GO:0016999 antibiotic metabolic process                                          | 9   | 1 | 0.0132516 | 0.0279358 | [AKR1B1]             |
| GO:0097067 cellular response to thyroid hormone stimulus                         | 9   | 1 | 0.0132516 | 0.0279358 | [CTSB]               |
| GO:0009165 nucleotide biosynthetic process                                       | 9   | 1 | 0.0132516 | 0.0279358 | [TYMS]               |
| GO:0000723 telomere maintenance                                                  | 10  | 1 | 0.0147133 | 0.0291772 | [PTGES3]             |
| GO:0001654 eye development                                                       | 10  | 1 | 0.0147133 | 0.0291772 | [TGFB2]              |
| GO:0045787 positive regulation of cell cycle                                     | 10  | 1 | 0.0147133 | 0.0291772 | [TGFB2]              |
| GO:0030261 chromosome condensation                                               | 11  | 1 | 0.0161728 | 0.0307678 | [NCAPG2]             |
| GO:0030838 positive regulation of actin filament polymerization                  | 11  | 1 | 0.0161728 | 0.0307678 | [ARF6]               |
| GO:0008219 cell death                                                            | 136 | 2 | 0.0174542 | 0.032415  | [RRAGA, TGFB2]       |
| GO:0001516 prostaglandin biosynthetic process                                    | 12  | 1 | 0.0176302 | 0.0314922 | [PTGES3]             |

|            |                                                                                           |     |   |           |           |                       |
|------------|-------------------------------------------------------------------------------------------|-----|---|-----------|-----------|-----------------------|
| GO:0032008 | positive regulation of TOR signaling cascade                                              | 12  | 1 | 0.0176302 | 0.0314922 | [RRAGA]               |
| GO:0032436 | positive regulation of proteasomal ubiquitin-dependent protein catabolic process          | 12  | 1 | 0.0176302 | 0.0314922 | [RCHY1]               |
| GO:0000902 | cell morphogenesis                                                                        | 12  | 1 | 0.0176302 | 0.0314922 | [TGFB2]               |
| GO:0030218 | erythrocyte differentiation                                                               | 13  | 1 | 0.0190855 | 0.0325987 | [ACIN1]               |
| GO:0034613 | cellular protein localization                                                             | 13  | 1 | 0.0190855 | 0.0325987 | [RRAGA]               |
| GO:0042060 | wound healing                                                                             | 15  | 1 | 0.0219898 | 0.0362367 | [TGFB2]               |
| GO:0050680 | negative regulation of epithelial cell proliferation                                      | 15  | 1 | 0.0219898 | 0.0362367 | [KRT4]                |
| GO:0030593 | neutrophil chemotaxis                                                                     | 15  | 1 | 0.0219898 | 0.0362367 | [TGFB2]               |
| GO:0009636 | response to toxin                                                                         | 17  | 1 | 0.0248855 | 0.0396137 | [EPHX1]               |
| GO:0030855 | epithelial cell differentiation                                                           | 17  | 1 | 0.0248855 | 0.0396137 | [KRT4]                |
| GO:0042787 | protein ubiquitination involved in ubiquitin-dependent protein catabolic process          | 18  | 1 | 0.0263302 | 0.0408032 | [RCHY1]               |
| GO:0006898 | receptor-mediated endocytosis                                                             | 18  | 1 | 0.0263302 | 0.0408032 | [PICALM]              |
| GO:0031398 | positive regulation of protein ubiquitination                                             | 22  | 1 | 0.032088  | 0.0487572 | [RCHY1]               |
| GO:0006508 | proteolysis                                                                               | 476 | 3 | 0.0337625 | 0.0506438 | [CAPN10, CTSB, SPCS2] |
| GO:0051865 | protein autoubiquitination                                                                | 25  | 1 | 0.0363844 | 0.0532122 | [RCHY1]               |
| GO:0043154 | negative regulation of cysteine-type endopeptidase activity involved in apoptotic process | 25  | 1 | 0.0363844 | 0.0532122 | [DNAJB6]              |
| GO:0048015 | phosphatidylinositol-mediated signaling                                                   | 25  | 1 | 0.0363844 | 0.0532122 | [TYMS]                |
| GO:0030097 | hemopoiesis                                                                               | 29  | 1 | 0.0420836 | 0.0600462 | [TGFB2]               |
| GO:0030307 | positive regulation of cell growth                                                        | 30  | 1 | 0.0435033 | 0.0613239 | [TGFB2]               |
| GO:0009790 | embryo development                                                                        | 31  | 1 | 0.0449208 | 0.0621981 | [TGFB2]               |
| GO:0006928 | cellular component movement                                                               | 31  | 1 | 0.0449208 | 0.0621981 | [ARF6]                |
| GO:0008643 | carbohydrate transport                                                                    | 35  | 1 | 0.0505704 | 0.0684015 | [PEA15]               |
| GO:0006986 | response to unfolded protein                                                              | 35  | 1 | 0.0505704 | 0.0684015 | [DNAJB6]              |
| GO:0007507 | heart development                                                                         | 37  | 1 | 0.0533828 | 0.0709748 | [TGFB2]               |
| GO:0006979 | response to oxidative stress                                                              | 40  | 1 | 0.057586  | 0.075703  | [PRDX5]               |
| GO:0051781 | positive regulation of cell division                                                      | 41  | 1 | 0.058983  | 0.0766779 | [TGFB2]               |
| GO:0006633 | fatty acid biosynthetic process                                                           | 42  | 1 | 0.060378  | 0.0776288 | [PTGES3]              |
| GO:0051092 | positive regulation of NF-kappaB transcription factor activity                            | 45  | 1 | 0.0645507 | 0.0820916 | [TERF2IP]             |
| GO:0005975 | carbohydrate metabolic process                                                            | 58  | 1 | 0.0824224 | 0.1036927 | [PGP]                 |
| GO:0006417 | regulation of translation                                                                 | 59  | 1 | 0.0837831 | 0.1042832 | [EIF4E2]              |
| GO:0007010 | cytoskeleton organization                                                                 | 71  | 1 | 0.0999578 | 0.1231059 | [KRT4]                |



|                                                                     |      |   |           |           |                                 |
|---------------------------------------------------------------------|------|---|-----------|-----------|---------------------------------|
| GO:0015031 protein transport                                        | 383  | 2 | 0.1105116 | 0.1346861 | [ARF6, RAB23]                   |
| GO:0006917 induction of apoptosis                                   | 79   | 1 | 0.1105844 | 0.1333853 | [NUDT2]                         |
| GO:0006355 regulation of transcription, DNA-dependent               | 1254 | 4 | 0.1151356 | 0.1374578 | [EWSR1, FOXK2, HNRPDL, TERF2IP] |
| GO:0007155 cell adhesion                                            | 420  | 2 | 0.1284969 | 0.1518599 | [ARF6, TNFAIP6]                 |
| GO:0006260 DNA replication                                          | 93   | 1 | 0.1288845 | 0.1507949 | [TYMS]                          |
| GO:0000398 nuclear mRNA splicing, via spliceosome                   | 98   | 1 | 0.13533   | 0.1567684 | [SNRPD1]                        |
| GO:0016567 protein ubiquitination                                   | 99   | 1 | 0.1366134 | 0.1567036 | [RCHY1]                         |
| GO:0008284 positive regulation of cell proliferation                | 102  | 1 | 0.1404525 | 0.1580091 | [TGFB2]                         |
| GO:0008285 negative regulation of cell proliferation                | 102  | 1 | 0.1404525 | 0.1580091 | [TGFB2]                         |
| GO:0001525 angiogenesis                                             | 102  | 1 | 0.1404525 | 0.1580091 | [TGFB2]                         |
| GO:0043123 positive regulation of I-kappaB kinase/NF-kappaB cascade | 105  | 1 | 0.1442748 | 0.1592467 | [TERF2IP]                       |
| GO:0043066 negative regulation of apoptotic process                 | 118  | 1 | 0.1606456 | 0.1756592 | [PRDX5]                         |
| GO:0006954 inflammatory response                                    | 128  | 1 | 0.1730284 | 0.1874474 | [PRDX5]                         |
| GO:0007165 signal transduction                                      | 141  | 1 | 0.1888573 | 0.2027184 | [PPP1R1B]                       |
| GO:0006281 DNA repair                                               | 147  | 1 | 0.196062  | 0.2085387 | [TYMS]                          |
| GO:0007067 mitosis                                                  | 159  | 1 | 0.2102829 | 0.2216495 | [NCAPG2]                        |
| GO:0007399 nervous system development                               | 214  | 1 | 0.2723561 | 0.2845149 | [ARF6]                          |
| GO:0051301 cell division                                            | 285  | 1 | 0.3454282 | 0.3576558 | [NCAPG2]                        |
| GO:0006810 transport                                                | 395  | 1 | 0.4446061 | 0.4563063 | [PEA15]                         |
| GO:0007049 cell cycle                                               | 405  | 1 | 0.4528515 | 0.4607272 | [NCAPG2]                        |
| GO:0030154 cell differentiation                                     | 484  | 1 | 0.5138894 | 0.5183194 | [ARF6]                          |
| GO:0007275 multicellular organismal development                     | 822  | 1 | 1         | 1         | [MYOG]                          |

---

Table S8-2. GO annotation analysis of the module eigengene in six prenatal highly LDE-specific modules (LDE\_midnightblue).

| GO ID      | GO Name                                    | Total Count | Diff Count | P Value   | FDR       | Gene      |
|------------|--------------------------------------------|-------------|------------|-----------|-----------|-----------|
| GO:0071318 | cellular response to ATP                   | 1           | 1          | 0.000524  | 0.0101316 | [RYSR3]   |
| GO:0070588 | calcium ion transmembrane transport        | 1           | 1          | 0.000524  | 0.0101316 | [RYSR3]   |
| GO:0071286 | cellular response to magnesium ion         | 2           | 1          | 0.0010478 | 0.0086821 | [RYSR3]   |
| GO:0002318 | myeloid progenitor cell differentiation    | 2           | 1          | 0.0010478 | 0.0086821 | [MLF1]    |
| GO:0071313 | cellular response to caffeine              | 3           | 1          | 0.0015714 | 0.0091139 | [RYSR3]   |
| GO:0006744 | ubiquinone biosynthetic process            | 6           | 1          | 0.0031404 | 0.0151784 | [COQ9]    |
| GO:0051924 | regulation of calcium ion transport        | 7           | 1          | 0.0036628 | 0.014163  | [PLN]     |
| GO:0071526 | semaphorin-plexin signaling pathway        | 7           | 1          | 0.0036628 | 0.014163  | [PLXND1]  |
| GO:0045765 | regulation of angiogenesis                 | 10          | 1          | 0.0052287 | 0.016848  | [PLXND1]  |
| GO:0043542 | endothelial cell migration                 | 13          | 1          | 0.0067922 | 0.0196973 | [PLXND1]  |
| GO:0005977 | glycogen metabolic process                 | 14          | 1          | 0.0073128 | 0.0192793 | [PPP1R3B] |
| GO:0071277 | cellular response to calcium ion           | 15          | 1          | 0.0078332 | 0.0189303 | [RYSR3]   |
| GO:0007416 | synapse assembly                           | 20          | 1          | 0.0104312 | 0.0224078 | [PLXND1]  |
| GO:0016310 | phosphorylation                            | 20          | 1          | 0.0104312 | 0.0224078 | [PGK1]    |
| GO:0030334 | regulation of cell migration               | 22          | 1          | 0.0114686 | 0.0221726 | [PLXND1]  |
| GO:0051289 | protein homotetramerization                | 25          | 1          | 0.0130227 | 0.0236037 | [RYSR3]   |
| GO:0007517 | muscle organ development                   | 38          | 1          | 0.0197303 | 0.0336575 | [MYL1]    |
| GO:0006351 | transcription, DNA-dependent               | 48          | 1          | 0.0248602 | 0.0400526 | [MLF1]    |
| GO:0007050 | cell cycle arrest                          | 52          | 1          | 0.026905  | 0.0410655 | [MLF1]    |
| GO:0005975 | carbohydrate metabolic process             | 58          | 1          | 0.0299645 | 0.0434485 | [PPP1R3B] |
| GO:0006457 | protein folding                            | 68          | 1          | 0.0350432 | 0.048393  | [BAG3]    |
| GO:0006916 | anti-apoptosis                             | 84          | 1          | 0.0431163 | 0.0568351 | [BAG3]    |
| GO:0001525 | angiogenesis                               | 102         | 1          | 0.0521212 | 0.0657181 | [PLXND1]  |
| GO:0044419 | interspecies interaction between organisms | 315         | 1          | 0.1527102 | 0.1845248 | [SLC25A4] |
| GO:0007049 | cell cycle                                 | 405         | 1          | 0.1920693 | 0.2228004 | [MLF1]    |
| GO:0006811 | ion transport                              | 455         | 1          | 0.2131734 | 0.2377704 | [RYSR3]   |
| GO:0030154 | cell differentiation                       | 484         | 1          | 0.2251711 | 0.2418505 | [MLF1]    |
| GO:0008150 | biological_process                         | 588         | 1          | 0.2667746 | 0.2763022 | [ASPH]    |
| GO:0007275 | multicellular organismal development       | 822         | 1          | 0.3527118 | 0.3527118 | [MLF1]    |

Table S8-3. GO annotation analysis of the module eigengene in six prenatal highly LDE-specific modules (LDE\_only\_turquoise).

| GO ID      | GO Name                                                                                   | Total Count | Diff Count | P Value   | FDR       | Gene                     |
|------------|-------------------------------------------------------------------------------------------|-------------|------------|-----------|-----------|--------------------------|
| GO:0006915 | apoptotic process                                                                         | 321         | 3          | 0.0002915 | 0.0116613 | [FIS1, PDCD6IP, TAX1BP1] |
| GO:0090050 | positive regulation of cell migration involved in sprouting angiogenesis                  | 1           | 1          | 0.0004101 | 0.0082025 | [SRPX2]                  |
| GO:0016559 | peroxisome fission                                                                        | 2           | 1          | 0.0008201 | 0.0093725 | [FIS1]                   |
| GO:0043653 | mitochondrial fragmentation involved in apoptosis                                         | 2           | 1          | 0.0008201 | 0.0093725 | [FIS1]                   |
| GO:0000422 | mitochondrion degradation                                                                 | 3           | 1          | 0.0012299 | 0.0081993 | [FIS1]                   |
| GO:0000395 | nuclear mRNA 5'-splice site recognition                                                   | 3           | 1          | 0.0012299 | 0.0081993 | [PSIP1]                  |
| GO:0032471 | reduction of endoplasmic reticulum calcium ion concentration                              | 3           | 1          | 0.0012299 | 0.0081993 | [FIS1]                   |
| GO:0035584 | calcium-mediated signaling using intracellular calcium source                             | 4           | 1          | 0.0016395 | 0.0069034 | [FIS1]                   |
| GO:0001836 | release of cytochrome c from mitochondria                                                 | 4           | 1          | 0.0016395 | 0.0069034 | [FIS1]                   |
| GO:0051561 | elevation of mitochondrial calcium ion concentration                                      | 4           | 1          | 0.0016395 | 0.0069034 | [FIS1]                   |
| GO:0000266 | mitochondrial fission                                                                     | 4           | 1          | 0.0016395 | 0.0069034 | [FIS1]                   |
| GO:0048870 | cell motility                                                                             | 7           | 1          | 0.0028675 | 0.0095585 | [SRPX2]                  |
| GO:0006612 | protein targeting to membrane                                                             | 8           | 1          | 0.0032766 | 0.0097083 | [ATG4C]                  |
| GO:0042325 | regulation of phosphorylation                                                             | 8           | 1          | 0.0032766 | 0.0097083 | [SRPX2]                  |
| GO:0042273 | ribosomal large subunit biogenesis                                                        | 10          | 1          | 0.0040941 | 0.0109176 | [RPL14]                  |
| GO:0009408 | response to heat                                                                          | 11          | 1          | 0.0045027 | 0.0109155 | [PSIP1]                  |
| GO:0000045 | autophagic vacuole assembly                                                               | 11          | 1          | 0.0045027 | 0.0109155 | [ATG4C]                  |
| GO:0043280 | positive regulation of cysteine-type endopeptidase activity involved in apoptotic process | 14          | 1          | 0.0057273 | 0.0127274 | [FIS1]                   |
| GO:2001244 | positive regulation of intrinsic apoptotic signaling pathway                              | 15          | 1          | 0.0061352 | 0.0129163 | [FIS1]                   |
| GO:0044419 | interspecies interaction between organisms                                                | 315         | 2          | 0.0072821 | 0.0145642 | [PDCD6IP, PSIP1]         |
| GO:0015031 | protein transport                                                                         | 383         | 2          | 0.0105959 | 0.0201826 | [ATG4C, PDCD6IP]         |
| GO:0007204 | elevation of cytosolic calcium ion concentration                                          | 28          | 1          | 0.0114237 | 0.0207703 | [FIS1]                   |
| GO:0006914 | autophagy                                                                                 | 36          | 1          | 0.0146648 | 0.0255041 | [ATG4C]                  |
| GO:0006979 | response to oxidative stress                                                              | 40          | 1          | 0.0162817 | 0.0271361 | [PSIP1]                  |
| GO:0030036 | actin cytoskeleton organization                                                           | 43          | 1          | 0.0174927 | 0.0279883 | [FERMT2]                 |
| GO:0016337 | cell-cell adhesion                                                                        | 51          | 1          | 0.0207151 | 0.0318693 | [SRPX2]                  |
| GO:0008150 | biological_process                                                                        | 588         | 2          | 0.0237901 | 0.0352445 | [FAM189B, TMEM106C]      |

|            |                                                                      |      |   |           |           |           |
|------------|----------------------------------------------------------------------|------|---|-----------|-----------|-----------|
| GO:0008360 | regulation of cell shape                                             | 67   | 1 | 0.0271299 | 0.038757  | [FERMT2]  |
| GO:0006364 | rRNA processing                                                      | 80   | 1 | 0.0323128 | 0.0445693 | [RPL14]   |
| GO:0000398 | nuclear mRNA splicing, via spliceosome                               | 98   | 1 | 0.039446  | 0.0525946 | [HNRNPC]  |
| GO:0001525 | angiogenesis                                                         | 102  | 1 | 0.0410244 | 0.0529347 | [SRPX2]   |
| GO:0006412 | translation                                                          | 130  | 1 | 0.0520048 | 0.065006  | [RPL14]   |
| GO:0045944 | positive regulation of transcription from RNA polymerase II promoter | 158  | 1 | 0.0628663 | 0.0762016 | [PSIP1]   |
| GO:0051301 | cell division                                                        | 285  | 1 | 0.1106725 | 0.130203  | [PDCD6IP] |
| GO:0006810 | transport                                                            | 395  | 1 | 0.1502088 | 0.1716672 | [ETFA]    |
| GO:0007049 | cell cycle                                                           | 405  | 1 | 0.1537195 | 0.1707995 | [PDCD6IP] |
| GO:0007155 | cell adhesion                                                        | 420  | 1 | 0.1589599 | 0.1718485 | [FERMT2]  |
| GO:0006811 | ion transport                                                        | 455  | 1 | 0.1710684 | 0.180072  | [CHRNA1]  |
| GO:0006508 | proteolysis                                                          | 476  | 1 | 0.1782543 | 0.182825  | [ATG4C]   |
| GO:0006355 | regulation of transcription, DNA-dependent                           | 1254 | 1 | 0.4066022 | 0.4066022 | [PSIP1]   |

---

Table S8-4. GO annotation analysis of the module eigengene in six prenatal highly LDE-specific modules (LDE\_pink).

| GO ID      | GO Name                                              | Total Count | Diff Count | P Value     | FDR         | Gene            |
|------------|------------------------------------------------------|-------------|------------|-------------|-------------|-----------------|
| GO:0043462 | regulation of ATPase activity                        | 2           | 2          | 3.11494E-07 | 9.96781E-06 | [TNNT3, TPM2]   |
| GO:0030035 | microspike assembly                                  | 2           | 1          | 0.001138926 | 0.012148545 | [ACTN2]         |
| GO:0051963 | regulation of synapse assembly                       | 2           | 1          | 0.001138926 | 0.012148545 | [PDLIM5]        |
| GO:0002376 | immune system process                                | 2           | 1          | 0.001138926 | 0.012148545 | [ADSSL1]        |
| GO:0005978 | glycogen biosynthetic process                        | 3           | 1          | 0.001707922 | 0.009937001 | [GYS1]          |
| GO:0006167 | AMP biosynthetic process                             | 3           | 1          | 0.001707922 | 0.009937001 | [ADSSL1]        |
| GO:0006941 | striated muscle contraction                          | 4           | 1          | 0.002276607 | 0.009106428 | [PGAM2]         |
| GO:0006942 | regulation of striated muscle contraction            | 4           | 1          | 0.002276607 | 0.009106428 | [TNNT3]         |
| GO:0003009 | skeletal muscle contraction                          | 4           | 1          | 0.002276607 | 0.009106428 | [TNNT3]         |
| GO:0045184 | establishment of protein localization                | 6           | 1          | 0.003413044 | 0.010401657 | [ANK3]          |
| GO:0061001 | regulation of dendritic spine morphogenesis          | 6           | 1          | 0.003413044 | 0.010401657 | [PDLIM5]        |
| GO:0006644 | phospholipid metabolic process                       | 7           | 1          | 0.003980796 | 0.010615456 | [AGPAT2]        |
| GO:0031929 | TOR signaling cascade                                | 8           | 1          | 0.004548238 | 0.011195662 | [EIF4EBP1]      |
| GO:0080111 | DNA demethylation                                    | 9           | 1          | 0.005115369 | 0.011692272 | [APOBEC2]       |
| GO:0048041 | focal adhesion assembly                              | 12          | 1          | 0.006814903 | 0.01453846  | [ACTN2]         |
| GO:0045931 | positive regulation of mitotic cell cycle            | 16          | 1          | 0.009076613 | 0.017603128 | [EIF4EBP1]      |
| GO:0006164 | purine nucleotide biosynthetic process               | 16          | 1          | 0.009076613 | 0.017603128 | [ADSSL1]        |
| GO:0000082 | G1/S transition of mitotic cell cycle                | 22          | 1          | 0.01245991  | 0.02215095  | [EIF4EBP1]      |
| GO:0009117 | nucleotide metabolic process                         | 23          | 1          | 0.013022713 | 0.02193299  | [AMPD1]         |
| GO:0051289 | protein homotetramerization                          | 25          | 1          | 0.014147396 | 0.022635834 | [ACTN2]         |
| GO:0006096 | glycolysis                                           | 37          | 1          | 0.020869704 | 0.031801454 | [PGAM2]         |
| GO:0006120 | mitochondrial electron transport, NADH to ubiquinone | 42          | 1          | 0.023657659 | 0.03441114  | [NDUFB9]        |
| GO:0008654 | phospholipid biosynthetic process                    | 44          | 1          | 0.024770705 | 0.03446359  | [AGPAT2]        |
| GO:0042981 | regulation of apoptotic process                      | 65          | 1          | 0.036384391 | 0.048512521 | [ACTN2]         |
| GO:0008150 | biological_process                                   | 588         | 2          | 0.043875874 | 0.056161119 | [C6orf62, NRAP] |
| GO:0008219 | cell death                                           | 136         | 1          | 0.074674478 | 0.09190705  | [FOLR1]         |
| GO:0007165 | signal transduction                                  | 141         | 1          | 0.077315185 | 0.091632812 | [IGSF1]         |
| GO:0006397 | mRNA processing                                      | 144         | 1          | 0.078896136 | 0.090167012 | [APOBEC2]       |
| GO:0006810 | transport                                            | 395         | 1          | 0.202345827 | 0.223278153 | [NDUFB9]        |
| GO:0007155 | cell adhesion                                        | 420         | 1          | 0.213732364 | 0.227981188 | [ACTN2]         |

|                                                       |      |   |             |                      |
|-------------------------------------------------------|------|---|-------------|----------------------|
| GO:0006811 ion transport                              | 455  | 1 | 0.229411676 | 0.236812053 [CACNG1] |
| GO:0006355 regulation of transcription, DNA-dependent | 1254 | 1 | 0.515630047 | 0.515630047 [IGSF1]  |

---

Table S8-5. GO annotation analysis of the module eigengene in six prenatal highly LDE-specific modules (LDE\_red).

| GO ID      | GO Name                                              | Total Count | Diff Count | P Value   | FDR       | Gene             |
|------------|------------------------------------------------------|-------------|------------|-----------|-----------|------------------|
| GO:0032981 | mitochondrial respiratory chain complex I assembly   | 11          | 2          | 2.645E-05 | 0.0010315 | [NDUFS4, NDUFS8] |
| GO:0006120 | mitochondrial electron transport, NADH to ubiquinone | 42          | 2          | 0.0004084 | 0.0079647 | [NDUFS4, NDUFS8] |
| GO:0009308 | amine metabolic process                              | 1           | 1          | 0.0007063 | 0.0091823 | [AOC3]           |
| GO:0006167 | AMP biosynthetic process                             | 3           | 1          | 0.0021175 | 0.020646  | [ADSL]           |
| GO:0045647 | negative regulation of erythrocyte differentiation   | 4           | 1          | 0.0028224 | 0.0220148 | [MAFB]           |
| GO:0051591 | response to cAMP                                     | 6           | 1          | 0.0042307 | 0.0253844 | [NDUFS4]         |
| GO:0032869 | cellular response to insulin stimulus                | 6           | 1          | 0.0042307 | 0.0253844 | [SLC2A4]         |
| GO:0015758 | glucose transport                                    | 7           | 1          | 0.0049342 | 0.0226391 | [SLC2A4]         |
| GO:0051924 | regulation of calcium ion transport                  | 7           | 1          | 0.0049342 | 0.0226391 | [SLN]            |
| GO:0019933 | cAMP-mediated signaling                              | 8           | 1          | 0.0056371 | 0.0219848 | [NDUFS4]         |
| GO:0048146 | positive regulation of fibroblast proliferation      | 9           | 1          | 0.0063396 | 0.0224767 | [NDUFS4]         |
| GO:0046677 | response to antibiotic                               | 11          | 1          | 0.0077431 | 0.0232293 | [AOC3]           |
| GO:0035329 | hippo signaling cascade                              | 11          | 1          | 0.0077431 | 0.0232293 | [TEAD1]          |
| GO:0045333 | cellular respiration                                 | 11          | 1          | 0.0077431 | 0.0232293 | [NDUFS4]         |
| GO:0006936 | muscle contraction                                   | 12          | 1          | 0.0084441 | 0.0219547 | [MYH2]           |
| GO:0072593 | reactive oxygen species metabolic process            | 14          | 1          | 0.0098448 | 0.0239966 | [NDUFS4]         |
| GO:0051262 | protein tetramerization                              | 16          | 1          | 0.0112435 | 0.0243609 | [ADSL]           |
| GO:0045931 | positive regulation of mitotic cell cycle            | 16          | 1          | 0.0112435 | 0.0243609 | [USP2]           |
| GO:0006164 | purine nucleotide biosynthetic process               | 16          | 1          | 0.0112435 | 0.0243609 | [ADSL]           |
| GO:0016310 | phosphorylation                                      | 20          | 1          | 0.0140352 | 0.0273686 | [UGP2]           |
| GO:0016579 | protein deubiquitination                             | 29          | 1          | 0.0202886 | 0.0376789 | [USP2]           |
| GO:0050821 | protein stabilization                                | 31          | 1          | 0.0216731 | 0.0384204 | [USP2]           |
| GO:0007420 | brain development                                    | 33          | 1          | 0.0230556 | 0.0390943 | [NDUFS4]         |
| GO:0008643 | carbohydrate transport                               | 35          | 1          | 0.0244363 | 0.0397089 | [SLC2A4]         |
| GO:0009968 | negative regulation of signal transduction           | 36          | 1          | 0.0251259 | 0.0384278 | [RGS5]           |
| GO:0006914 | autophagy                                            | 36          | 1          | 0.0251259 | 0.0384278 | [ATG4A]          |
| GO:0007517 | muscle organ development                             | 38          | 1          | 0.0265037 | 0.0382831 | [USP2]           |
| GO:0006979 | response to oxidative stress                         | 40          | 1          | 0.0278796 | 0.0388323 | [NDUFS8]         |
| GO:0006810 | transport                                            | 395         | 2          | 0.0316386 | 0.0425485 | [NDUFS4, NDUFS8] |

|            |                                                                      |     |   |           |           |               |
|------------|----------------------------------------------------------------------|-----|---|-----------|-----------|---------------|
| GO:0007049 | cell cycle                                                           | 405 | 2 | 0.033119  | 0.0430547 | [PPP6C, USP2] |
| GO:0006816 | calcium ion transport                                                | 50  | 1 | 0.0347311 | 0.043694  | [SLN]         |
| GO:0007186 | G-protein coupled receptor signaling pathway                         | 51  | 1 | 0.0354137 | 0.0431604 | [LPAR6]       |
| GO:0006508 | proteolysis                                                          | 476 | 2 | 0.0443805 | 0.0524497 | [ATG4A, USP2] |
| GO:0000122 | negative regulation of transcription from RNA polymerase II promoter | 117 | 1 | 0.0794454 | 0.0911286 | [USP2]        |
| GO:0006954 | inflammatory response                                                | 128 | 1 | 0.0865923 | 0.0964886 | [AOC3]        |
| GO:0006412 | translation                                                          | 130 | 1 | 0.087886  | 0.0952098 | [MRPL45]      |
| GO:0015031 | protein transport                                                    | 383 | 1 | 0.2379964 | 0.250861  | [ATG4A]       |
| GO:0007155 | cell adhesion                                                        | 420 | 1 | 0.2578385 | 0.2646238 | [AOC3]        |
| GO:0008150 | biological_process                                                   | 588 | 1 | 0.3418166 | 0.3418166 | [WBSCR22]     |

---



Table S8-6 GO annotation analysis of the module eigengene in six prenatal highly LDE-specific modules (LDE\_tan).

| GO ID      | GO Name                                                                                             | Total Count | Diff Count | P Value     | FDR         | Gene           |
|------------|-----------------------------------------------------------------------------------------------------|-------------|------------|-------------|-------------|----------------|
| GO:0000462 | maturation of SSU-rRNA from tricistronic rRNA transcript (SSU-rRNA, 5.8S rRNA, LSU-rRNA)            | 1           | 1          | 0.000318987 | 0.006379731 | [NOP14]        |
| GO:0097045 | phosphatidylserine exposure on blood platelet                                                       | 1           | 1          | 0.000318987 | 0.006379731 | [ANO6]         |
| GO:0002543 | activation of blood coagulation via clotting cascade                                                | 1           | 1          | 0.000318987 | 0.006379731 | [ANO6]         |
| GO:0000480 | endonucleolytic cleavage in 5'-ETS of tricistronic rRNA transcript (SSU-rRNA, 5.8S rRNA, LSU-rRNA)  | 2           | 1          | 0.000637879 | 0.004639117 | [NOP14]        |
| GO:0007512 | adult heart development                                                                             | 2           | 1          | 0.000637879 | 0.004639117 | [MEF2D]        |
| GO:0000472 | endonucleolytic cleavage to generate mature 5'-end of SSU-rRNA from (SSU-rRNA, 5.8S rRNA, LSU-rRNA) | 2           | 1          | 0.000637879 | 0.004639117 | [NOP14]        |
| GO:0000447 | endonucleolytic cleavage in 11S1 to separate SSU-rRNA from 5.8S rRNA and LSU-rRNA                   | 2           | 1          | 0.000637879 | 0.004639117 | [NOP14]        |
| GO:0033687 | osteoblast proliferation                                                                            | 3           | 1          | 0.000956676 | 0.004251894 | [OSR2]         |
| GO:0006636 | unsaturated fatty acid biosynthetic process                                                         | 3           | 1          | 0.000956676 | 0.004251894 | [DECR2]        |
| GO:0070681 | glutaminyl-tRNA <sup>Gln</sup> biosynthesis via transamidation                                      | 3           | 1          | 0.000956676 | 0.004251894 | [GATC]         |
| GO:0061029 | eyelid development in camera-type eye                                                               | 4           | 1          | 0.001275379 | 0.004081214 | [OSR2]         |
| GO:0042474 | middle ear morphogenesis                                                                            | 4           | 1          | 0.001275379 | 0.004081214 | [OSR2]         |
| GO:0007253 | cytoplasmic sequestering of NF-kappaB                                                               | 4           | 1          | 0.001275379 | 0.004081214 | [G3BP2]        |
| GO:0060349 | bone morphogenesis                                                                                  | 4           | 1          | 0.001275379 | 0.004081214 | [OSR2]         |
| GO:0032543 | mitochondrial translation                                                                           | 5           | 1          | 0.001593988 | 0.004250635 | [GATC]         |
| GO:0048704 | embryonic skeletal system morphogenesis                                                             | 7           | 1          | 0.002230922 | 0.005577306 | [OSR2]         |
| GO:0001656 | metanephros development                                                                             | 8           | 1          | 0.002549248 | 0.005998231 | [OSR2]         |
| GO:0001823 | mesonephros development                                                                             | 10          | 1          | 0.003185617 | 0.007079148 | [OSR2]         |
| GO:0007265 | Ras protein signal transduction                                                                     | 11          | 1          | 0.003503659 | 0.007186994 | [G3BP2]        |
| GO:0042274 | ribosomal small subunit biogenesis                                                                  | 11          | 1          | 0.003503659 | 0.007186994 | [NOP14]        |
| GO:0060021 | palate development                                                                                  | 12          | 1          | 0.003821608 | 0.007279253 | [OSR2]         |
| GO:0050679 | positive regulation of epithelial cell proliferation                                                | 15          | 1          | 0.004774889 | 0.008681616 | [OSR2]         |
| GO:0045893 | positive regulation of transcription, DNA-dependent                                                 | 334         | 2          | 0.004946192 | 0.008602072 | [OSR2, SS18L1] |
| GO:0042476 | odontogenesis                                                                                       | 17          | 1          | 0.005409938 | 0.009016564 | [OSR2]         |
| GO:0031398 | positive regulation of protein ubiquitination                                                       | 22          | 1          | 0.006995917 | 0.011193467 | [TBC1D7]       |
| GO:0009790 | embryo development                                                                                  | 31          | 1          | 0.009844762 | 0.015145788 | [OSR2]         |

|            |                                                                      |      |   |             |                       |
|------------|----------------------------------------------------------------------|------|---|-------------|-----------------------|
| GO:0010628 | positive regulation of gene expression                               | 49   | 1 | 0.015519699 | 0.022992146 [OSR2]    |
| GO:0051028 | mRNA transport                                                       | 60   | 1 | 0.018972832 | 0.027104045 [G3BP2]   |
| GO:0006364 | rRNA processing                                                      | 80   | 1 | 0.025222458 | 0.034789597 [NOP14]   |
| GO:0008284 | positive regulation of cell proliferation                            | 102  | 1 | 0.032054335 | 0.042739113 [OSR2]    |
| GO:0045944 | positive regulation of transcription from RNA polymerase II promoter | 158  | 1 | 0.049244458 | 0.063541236 [MEF2D]   |
| GO:0007399 | nervous system development                                           | 214  | 1 | 0.06615074  | 0.082688426 [MEF2D]   |
| GO:0016568 | chromatin modification                                               | 221  | 1 | 0.068244285 | 0.082720345 [SS18L1]  |
| GO:0044419 | interspecies interaction between organisms                           | 315  | 1 | 0.095938663 | 0.112869015 [EIF4H]   |
| GO:0006915 | apoptotic process                                                    | 321  | 1 | 0.097680172 | 0.111634483 [MEF2D]   |
| GO:0006810 | transport                                                            | 395  | 1 | 0.118904216 | 0.132115796 [G3BP2]   |
| GO:0006811 | ion transport                                                        | 455  | 1 | 0.13577158  | 0.146780087 [ANO6]    |
| GO:0008150 | biological_process                                                   | 588  | 1 | 0.17209761  | 0.181155379 [GLTSCR2] |
| GO:0007275 | multicellular organismal development                                 | 822  | 1 | 0.232589221 | 0.238553047 [MEF2D]   |
| GO:0006355 | regulation of transcription, DNA-dependent                           | 1254 | 1 | 0.333620463 | 0.333620463 [MEF2D]   |

---

Table S9-1. GO annotation analysis of the module eigengene in five prenatal highly LT-specific modules (LT\_blue).

| GO ID      | GO Name                                                     | Total Count | Diff Count | P Value   | FDR       | Gene                                 |
|------------|-------------------------------------------------------------|-------------|------------|-----------|-----------|--------------------------------------|
| GO:0006397 | mRNA processing                                             | 144         | 5          | 2.078E-05 | 0.0026805 | [BCAS2, DHX15, LUC7L3, PTBP2, RNPC3] |
| GO:0006950 | response to stress                                          | 104         | 4          | 9.795E-05 | 0.0063176 | [HSP90AB1, HSPA4, HSPB11, LUC7L3]    |
| GO:0032436 | positive regulation of proteasomal ubiquitin-dependent pro  | 12          | 2          | 0.0003342 | 0.0143708 | [GNB2L1, RCHY1]                      |
| GO:0030282 | bone mineralization                                         | 13          | 2          | 0.0003944 | 0.0127188 | [SBDS, TUFT1]                        |
| GO:0031398 | positive regulation of protein ubiquitination               | 22          | 2          | 0.0011525 | 0.0297335 | [RCHY1, TBC1D7]                      |
| GO:0042637 | catagen                                                     | 1           | 1          | 0.0022785 | 0.0279927 | [TGFB2]                              |
| GO:0043148 | mitotic spindle stabilization                               | 1           | 1          | 0.0022785 | 0.0279927 | [SBDS]                               |
| GO:0007220 | Notch receptor processing                                   | 1           | 1          | 0.0022785 | 0.0279927 | [APH1A]                              |
| GO:0045823 | positive regulation of heart contraction                    | 1           | 1          | 0.0022785 | 0.0279927 | [TGFB2]                              |
| GO:0051795 | positive regulation of catagen                              | 1           | 1          | 0.0022785 | 0.0279927 | [TGFB2]                              |
| GO:0048103 | somatic stem cell division                                  | 1           | 1          | 0.0022785 | 0.0279927 | [TGFB2]                              |
| GO:0031293 | membrane protein intracellular domain proteolysis           | 1           | 1          | 0.0022785 | 0.0279927 | [APH1A]                              |
| GO:0010611 | regulation of cardiac muscle hypertrophy                    | 1           | 1          | 0.0022785 | 0.0279927 | [LMCD1]                              |
| GO:0070072 | vacuolar proton-transporting V-type ATPase complex assembly | 1           | 1          | 0.0022785 | 0.0279927 | [VMA21]                              |
| GO:0006517 | protein deglycosylation                                     | 1           | 1          | 0.0022785 | 0.0279927 | [AGA]                                |
| GO:0006986 | response to unfolded protein                                | 35          | 2          | 0.0029118 | 0.0234762 | [HSP90AB1, HSPA4]                    |
| GO:0006412 | translation                                                 | 130         | 3          | 0.0033301 | 0.0252694 | [AARSD1, RPL36, RPSA]                |
| GO:0051781 | positive regulation of cell division                        | 41          | 2          | 0.0039774 | 0.0285045 | [TGFB2, TGFB3]                       |
| GO:0006839 | mitochondrial transport                                     | 2           | 1          | 0.0045518 | 0.024466  | [KIAA1279]                           |
| GO:0032464 | positive regulation of protein homooligomerization          | 2           | 1          | 0.0045518 | 0.024466  | [GNB2L1]                             |
| GO:0060038 | cardiac muscle cell proliferation                           | 2           | 1          | 0.0045518 | 0.024466  | [TGFB2]                              |
| GO:0010002 | cardioblast differentiation                                 | 2           | 1          | 0.0045518 | 0.024466  | [TGFB2]                              |
| GO:0000042 | protein targeting to Golgi                                  | 2           | 1          | 0.0045518 | 0.024466  | [RAB6A]                              |
| GO:0042987 | amyloid precursor protein catabolic process                 | 2           | 1          | 0.0045518 | 0.024466  | [APH1A]                              |
| GO:0070886 | positive regulation of calcineurin-NFAT signaling cascade   | 2           | 1          | 0.0045518 | 0.024466  | [LMCD1]                              |
| GO:0050778 | positive regulation of immune response                      | 2           | 1          | 0.0045518 | 0.024466  | [TGFB2]                              |
| GO:0051302 | regulation of cell division                                 | 2           | 1          | 0.0045518 | 0.024466  | [GNB2L1]                             |
| GO:0051891 | positive regulation of cardioblast differentiation          | 2           | 1          | 0.0045518 | 0.024466  | [TGFB2]                              |
| GO:0050765 | negative regulation of phagocytosis                         | 2           | 1          | 0.0045518 | 0.024466  | [GNB2L1]                             |
| GO:0008380 | RNA splicing                                                | 150         | 3          | 0.0049663 | 0.0213549 | [BCAS2, LUC7L3, RNPC3]               |

|                                                                             |     |   |           |           |                              |
|-----------------------------------------------------------------------------|-----|---|-----------|-----------|------------------------------|
| GO:0016445 somatic diversification of immunoglobulins                       | 3   | 1 | 0.00682   | 0.0266601 | [CTNNBL1]                    |
| GO:0042256 mature ribosome assembly                                         | 3   | 1 | 0.00682   | 0.0266601 | [SBDS]                       |
| GO:0042416 dopamine biosynthetic process                                    | 3   | 1 | 0.00682   | 0.0266601 | [TGFB2]                      |
| GO:0048539 bone marrow development                                          | 3   | 1 | 0.00682   | 0.0266601 | [SBDS]                       |
| GO:0031340 positive regulation of vesicle fusion                            | 3   | 1 | 0.00682   | 0.0266601 | [ANXA1]                      |
| GO:0071569 protein ufmylation                                               | 4   | 1 | 0.0090831 | 0.0312459 | [UFM1]                       |
| GO:0009303 rRNA transcription                                               | 4   | 1 | 0.0090831 | 0.0312459 | [RNASEK]                     |
| GO:0016071 mRNA metabolic process                                           | 4   | 1 | 0.0090831 | 0.0312459 | [PCBP1]                      |
| GO:0051457 maintenance of protein location in nucleus                       | 4   | 1 | 0.0090831 | 0.0312459 | [ARL2BP]                     |
| GO:0031069 hair follicle morphogenesis                                      | 5   | 1 | 0.0113411 | 0.0344236 | [TGFB2]                      |
| GO:0033119 negative regulation of RNA splicing                              | 5   | 1 | 0.0113411 | 0.0344236 | [PTBP2]                      |
| GO:0008154 actin polymerization or depolymerization                         | 5   | 1 | 0.0113411 | 0.0344236 | [ABI1]                       |
| GO:0030595 leukocyte chemotaxis                                             | 5   | 1 | 0.0113411 | 0.0344236 | [SBDS]                       |
| GO:0043547 positive regulation of GTPase activity                           | 5   | 1 | 0.0113411 | 0.0344236 | [GNB2L1]                     |
| GO:0048699 generation of neurons                                            | 5   | 1 | 0.0113411 | 0.0344236 | [TGFB2]                      |
| GO:0015031 protein transport                                                | 383 | 4 | 0.0116122 | 0.0325646 | [ARF5, RAB6A, SFT2D1, TRAM1] |
| GO:0050777 negative regulation of immune response                           | 6   | 1 | 0.013594  | 0.0365338 | [TGFB2]                      |
| GO:0045184 establishment of protein localization                            | 6   | 1 | 0.013594  | 0.0365338 | [PLEKHA1]                    |
| GO:2000543 positive regulation of gastrulation                              | 6   | 1 | 0.013594  | 0.0365338 | [GNB2L1]                     |
| GO:0006364 rRNA processing                                                  | 80  | 2 | 0.0144706 | 0.0373342 | [SBDS, UTP18]                |
| GO:0043065 positive regulation of apoptotic process                         | 83  | 2 | 0.0155148 | 0.0392434 | [CTNNBL1, GNB2L1]            |
| GO:0031529 ruffle organization                                              | 7   | 1 | 0.0158418 | 0.0371562 | [PLEKHA1]                    |
| GO:0032880 regulation of protein localization                               | 7   | 1 | 0.0158418 | 0.0371562 | [GNB2L1]                     |
| GO:0048666 neuron development                                               | 7   | 1 | 0.0158418 | 0.0371562 | [TGFB2]                      |
| GO:2000114 regulation of establishment of cell polarity                     | 7   | 1 | 0.0158418 | 0.0371562 | [GNB2L1]                     |
| GO:0043525 positive regulation of neuron apoptosis                          | 7   | 1 | 0.0158418 | 0.0371562 | [TGFB2]                      |
| GO:0000387 spliceosomal snRNP assembly                                      | 7   | 1 | 0.0158418 | 0.0371562 | [SNRPC]                      |
| GO:0045429 positive regulation of nitric oxide biosynthetic process         | 7   | 1 | 0.0158418 | 0.0371562 | [HSP90AB1]                   |
| GO:0006916 anti-apoptosis                                                   | 84  | 2 | 0.0158699 | 0.0346986 | [ANXA1, ANXA4]               |
| GO:0070301 cellular response to hydrogen peroxide                           | 8   | 1 | 0.0180845 | 0.0385604 | [PLEKHA1]                    |
| GO:0001942 hair follicle development                                        | 8   | 1 | 0.0180845 | 0.0385604 | [TGFB2]                      |
| GO:0042517 positive regulation of tyrosine phosphorylation of Stat3 protein | 9   | 1 | 0.0203222 | 0.0416121 | [ARL2BP]                     |
| GO:0014065 phosphatidylinositol 3-kinase cascade                            | 9   | 1 | 0.0203222 | 0.0416121 | [PLEKHA1]                    |

|                                                                                             |     |   |           |           |                                 |
|---------------------------------------------------------------------------------------------|-----|---|-----------|-----------|---------------------------------|
| GO:0097067 cellular response to thyroid hormone stimulus                                    | 9   | 1 | 0.0203222 | 0.0416121 | [CTSB]                          |
| GO:0045332 phospholipid translocation                                                       | 10  | 1 | 0.0225548 | 0.0440845 | [ATP11A]                        |
| GO:0001654 eye development                                                                  | 10  | 1 | 0.0225548 | 0.0440845 | [TGFB2]                         |
| GO:0045787 positive regulation of cell cycle                                                | 10  | 1 | 0.0225548 | 0.0440845 | [TGFB2]                         |
| GO:0016192 vesicle-mediated transport                                                       | 104 | 2 | 0.0236784 | 0.0449193 | [ARF5, RAB6A]                   |
| GO:0006508 proteolysis                                                                      | 476 | 4 | 0.0237133 | 0.0443336 | [CTSB, PSMC1, SPCS2, TMPRSS11F] |
| GO:0018149 peptide cross-linking                                                            | 11  | 1 | 0.0247824 | 0.0456705 | [ANXA1]                         |
| GO:0016925 protein sumoylation                                                              | 12  | 1 | 0.027005  | 0.048384  | [UBA2]                          |
| GO:0051898 negative regulation of protein kinase B signaling cascade                        | 12  | 1 | 0.027005  | 0.048384  | [PLEKHA1]                       |
| GO:0000902 cell morphogenesis                                                               | 12  | 1 | 0.027005  | 0.048384  | [TGFB2]                         |
| GO:0006446 regulation of translational initiation                                           | 13  | 1 | 0.0292225 | 0.0506001 | [EIF4G2]                        |
| GO:0006730 one-carbon metabolic process                                                     | 13  | 1 | 0.0292225 | 0.0506001 | [MAT2A]                         |
| GO:0005977 glycogen metabolic process                                                       | 14  | 1 | 0.0314351 | 0.052664  | [PPP1CB]                        |
| GO:0017148 negative regulation of translation                                               | 14  | 1 | 0.0314351 | 0.052664  | [GNB2L1]                        |
| GO:0030199 collagen fibril organization                                                     | 14  | 1 | 0.0314351 | 0.052664  | [LUM]                           |
| GO:2001244 positive regulation of intrinsic apoptotic signaling pathway                     | 15  | 1 | 0.0336427 | 0.0539118 | [GNB2L1]                        |
| GO:0042060 wound healing                                                                    | 15  | 1 | 0.0336427 | 0.0539118 | [TGFB2]                         |
| GO:0048511 rhythmic process                                                                 | 15  | 1 | 0.0336427 | 0.0539118 | [GNB2L1]                        |
| GO:0030593 neutrophil chemotaxis                                                            | 15  | 1 | 0.0336427 | 0.0539118 | [TGFB2]                         |
| GO:0044419 interspecies interaction between organisms                                       | 315 | 3 | 0.0355689 | 0.0552819 | [GNB2L1, PSMB4, YWHAE]          |
| GO:0006164 purine nucleotide biosynthetic process                                           | 16  | 1 | 0.0358452 | 0.055048  | [ATIC]                          |
| GO:0030178 negative regulation of Wnt receptor signaling pathway                            | 17  | 1 | 0.0380428 | 0.057398  | [GNB2L1]                        |
| GO:0042476 odontogenesis                                                                    | 17  | 1 | 0.0380428 | 0.057398  | [TUFT1]                         |
| GO:0030155 regulation of cell adhesion                                                      | 18  | 1 | 0.0402355 | 0.0593186 | [PPP1CB]                        |
| GO:0042787 protein ubiquitination involved in ubiquitin-dependent protein catabolic process | 18  | 1 | 0.0402355 | 0.0593186 | [RCHY1]                         |
| GO:0007165 signal transduction                                                              | 141 | 2 | 0.0413417 | 0.0599222 | [ANXA1, ANXA4]                  |
| GO:0050853 B cell receptor signaling pathway                                                | 19  | 1 | 0.0424232 | 0.0608065 | [PLEKHA1]                       |
| GO:0001934 positive regulation of protein phosphorylation                                   | 21  | 1 | 0.0467838 | 0.0663198 | [GNB2L1]                        |
| GO:0051726 regulation of cell cycle                                                         | 22  | 1 | 0.0489567 | 0.0682747 | [GNB2L1]                        |
| GO:0000375 RNA splicing, via transesterification reactions                                  | 22  | 1 | 0.0489567 | 0.0682747 | [BCAS2]                         |
| GO:0006464 protein modification process                                                     | 24  | 1 | 0.0532878 | 0.073129  | [RABGGTB]                       |
| GO:0051865 protein autoubiquitination                                                       | 25  | 1 | 0.0554461 | 0.0752899 | [RCHY1]                         |
| GO:0000184 nuclear-transcribed mRNA catabolic process                                       | 27  | 1 | 0.0597479 | 0.0802863 | [PARN]                          |

|                                                                 |      |   |           |           |                          |
|-----------------------------------------------------------------|------|---|-----------|-----------|--------------------------|
| GO:0006810 transport                                            | 395  | 3 | 0.0618283 | 0.0822252 | [CD36, NDUFC2, UCP2]     |
| GO:0030216 keratinocyte differentiation                         | 29   | 1 | 0.0640304 | 0.0838571 | [ANXA1]                  |
| GO:0030097 hemopoiesis                                          | 29   | 1 | 0.0640304 | 0.0838571 | [TGFB2]                  |
| GO:0030307 positive regulation of cell growth                   | 30   | 1 | 0.0661644 | 0.0853521 | [TGFB2]                  |
| GO:0006468 protein phosphorylation                              | 185  | 2 | 0.0668901 | 0.0854339 | [MAPK6, OXSR1]           |
| GO:0009790 embryo development                                   | 31   | 1 | 0.0682936 | 0.08595   | [TGFB2]                  |
| GO:0006928 cellular component movement                          | 31   | 1 | 0.0682936 | 0.08595   | [ABI1]                   |
| GO:0007507 heart development                                    | 37   | 1 | 0.0809681 | 0.1004316 | [TGFB2]                  |
| GO:0022900 electron transport chain                             | 41   | 1 | 0.0893228 | 0.1097394 | [NDUFC2]                 |
| GO:0006120 mitochondrial electron transport, NADH to ubiquinone | 42   | 1 | 0.0913997 | 0.1112317 | [NDUFC2]                 |
| GO:0007243 intracellular protein kinase cascade                 | 45   | 1 | 0.0976023 | 0.11767   | [OXSR1]                  |
| GO:0030335 positive regulation of cell migration                | 46   | 1 | 0.0996605 | 0.1190389 | [GNB2L1]                 |
| GO:0040008 regulation of growth                                 | 51   | 1 | 0.109882  | 0.1300438 | [GNB2L1]                 |
| GO:0030308 negative regulation of cell growth                   | 58   | 1 | 0.1239993 | 0.1447594 | [GNB2L1]                 |
| GO:0005975 carbohydrate metabolic process                       | 58   | 1 | 0.1239993 | 0.1447594 | [PPP1CB]                 |
| GO:0042981 regulation of apoptotic process                      | 65   | 1 | 0.137895  | 0.1588255 | [CTSB]                   |
| GO:0008150 biological_process                                   | 588  | 3 | 0.1508998 | 0.1722662 | [KIAA1191, PDGFRL, SDC2] |
| GO:0006897 endocytosis                                          | 83   | 1 | 0.1726327 | 0.1953475 | [MARCH3]                 |
| GO:0008283 cell proliferation                                   | 90   | 1 | 0.1857643 | 0.2083791 | [SBDS]                   |
| GO:0000398 nuclear mRNA splicing, via spliceosome               | 98   | 1 | 0.2005194 | 0.2229914 | [SNRPC]                  |
| GO:0016567 protein ubiquitination                               | 99   | 1 | 0.2023451 | 0.2230984 | [RCHY1]                  |
| GO:0008284 positive regulation of cell proliferation            | 102  | 1 | 0.2077974 | 0.2252593 | [TGFB2]                  |
| GO:0008285 negative regulation of cell proliferation            | 102  | 1 | 0.2077974 | 0.2252593 | [TGFB2]                  |
| GO:0001525 angiogenesis                                         | 102  | 1 | 0.2077974 | 0.2252593 | [TGFB2]                  |
| GO:0007049 cell cycle                                           | 405  | 2 | 0.2356928 | 0.2512758 | [MAPK6, PPP1CB]          |
| GO:0008219 cell death                                           | 136  | 1 | 0.2670698 | 0.2823935 | [TGFB2]                  |
| GO:0007399 nervous system development                           | 214  | 1 | 0.386969  | 0.4058455 | [KIAA1279]               |
| GO:0007275 multicellular organismal development                 | 822  | 3 | 0.4392374 | 0.4569486 | [GNB2L1, KIAA1279, MYOG] |
| GO:0051301 cell division                                        | 285  | 1 | 0.4791125 | 0.4944442 | [PPP1CB]                 |
| GO:0006915 apoptotic process                                    | 321  | 1 | 0.5204517 | 0.5328434 | [LUC7L3]                 |
| GO:0007155 cell adhesion                                        | 420  | 1 | 0.618124  | 0.6278582 | [CD36]                   |
| GO:0006355 regulation of transcription, DNA-dependent           | 1254 | 3 | 0.7639818 | 0.7699504 | [ELOF1, HNRPDL, LMCD1]   |
| GO:0030154 cell differentiation                                 | 484  | 1 | 1         | 1         | [KIAA1279]               |

Table S9-2. GO annotation analysis of the module eigengene in five prenatal highly LT-specific modules (LT\_darkred).

| GO ID      | GO Name                                              | Total Count | Diff Count | P Value     | FDR         | Gene            |
|------------|------------------------------------------------------|-------------|------------|-------------|-------------|-----------------|
| GO:0019439 | aromatic compound catabolic process                  | 2           | 1          | 0.000683434 | 0.015035538 | [EPHX1]         |
| GO:0046903 | secretion                                            | 3           | 1          | 0.001024987 | 0.011274855 | [TPD52]         |
| GO:0007253 | cytoplasmic sequestering of NF-kappaB                | 4           | 1          | 0.001366431 | 0.010020495 | [G3BP2]         |
| GO:0006200 | ATP catabolic process                                | 6           | 1          | 0.002048993 | 0.011269462 | [ATP5O]         |
| GO:0006754 | ATP biosynthetic process                             | 8           | 1          | 0.002731119 | 0.010924478 | [ATP5O]         |
| GO:0071230 | cellular response to amino acid stimulus             | 8           | 1          | 0.002731119 | 0.010924478 | [RRAGD]         |
| GO:0007265 | Ras protein signal transduction                      | 11          | 1          | 0.003753493 | 0.011796693 | [G3BP2]         |
| GO:0032008 | positive regulation of TOR signaling cascade         | 12          | 1          | 0.004094067 | 0.011258684 | [RRAGD]         |
| GO:0034613 | cellular protein localization                        | 13          | 1          | 0.004434532 | 0.010839968 | [RRAGD]         |
| GO:0042776 | mitochondrial ATP synthesis coupled proton transport | 14          | 1          | 0.004774889 | 0.010504755 | [ATP5O]         |
| GO:0009636 | response to toxin                                    | 17          | 1          | 0.005795307 | 0.011590613 | [EPHX1]         |
| GO:0030183 | B cell differentiation                               | 18          | 1          | 0.006135229 | 0.01124792  | [TPD52]         |
| GO:0006810 | transport                                            | 395         | 2          | 0.007851004 | 0.013286314 | [FAM21A, G3BP2] |
| GO:0042147 | retrograde transport, endosome to Golgi              | 24          | 1          | 0.008172486 | 0.012842478 | [FAM21A]        |
| GO:0015992 | proton transport                                     | 28          | 1          | 0.009528491 | 0.01397512  | [ATP5O]         |
| GO:0051028 | mRNA transport                                       | 60          | 1          | 0.020314407 | 0.02793231  | [G3BP2]         |
| GO:0006935 | chemotaxis                                           | 71          | 1          | 0.023996677 | 0.031054523 | [CMTM3]         |
| GO:0006364 | rRNA processing                                      | 80          | 1          | 0.02699983  | 0.032999792 | [RPF1]          |
| GO:0009615 | response to virus                                    | 114         | 1          | 0.038267417 | 0.044309641 | [PSMA2]         |
| GO:0006412 | translation                                          | 130         | 1          | 0.043527564 | 0.04788032  | [MRPL43]        |
| GO:0006915 | apoptotic process                                    | 321         | 1          | 0.10428176  | 0.109247558 | [NTN1]          |
| GO:0006811 | ion transport                                        | 455         | 1          | 0.144733949 | 0.144733949 | [ATP5O]         |

Table S9-3. GO annotation analysis of the module eigengene in five prenatal highly LT-specific modules (LT\_only\_turquoise).

| GO ID      | GO Name                                  | Total Count | Diff Count | P Value   | FDR         | Gene      |
|------------|------------------------------------------|-------------|------------|-----------|-------------|-----------|
| GO:0042359 | vitamin D metabolic process              | 1           | 1          | 0.0001367 | 0.000820251 | [CYP11A1] |
| GO:0006700 | C21-steroid hormone biosynthetic process | 1           | 1          | 0.0001367 | 0.000820251 | [CYP11A1] |
| GO:0043171 | peptide catabolic process                | 3           | 1          | 0.0004101 | 0.001230236 | [LTA4H]   |
| GO:0030163 | protein catabolic process                | 14          | 1          | 0.0019125 | 0.00430313  | [TPRKB]   |
| GO:0019370 | leukotriene biosynthetic process         | 20          | 1          | 0.0027312 | 0.004916183 | [LTA4H]   |
| GO:0008203 | cholesterol metabolic process            | 24          | 1          | 0.0032767 | 0.004915063 | [CYP11A1] |
| GO:0006869 | lipid transport                          | 46          | 1          | 0.0062725 | 0.008064634 | [STAR]    |
| GO:0006810 | transport                                | 395         | 1          | 0.0528023 | 0.059402578 | [STAR]    |
| GO:0006508 | proteolysis                              | 476         | 1          | 0.0633377 | 0.063337684 | [LTA4H]   |



Table S9-4. GO annotation analysis of the module eigengene in five prenatal highly LT-specific modules (LT\_purple).

| GO ID      | GO Name                                                         | Total Count | Diff Count | P Value     | FDR         | Gene                 |
|------------|-----------------------------------------------------------------|-------------|------------|-------------|-------------|----------------------|
| GO:0071310 | cellular response to organic substance                          | 1           | 1          | 0.000797466 | 0.040670783 | [CLEC3B]             |
| GO:0043555 | regulation of translation in response to stress                 | 2           | 1          | 0.001594315 | 0.023231445 | [RPS6KA3]            |
| GO:0010756 | positive regulation of plasminogen activation                   | 2           | 1          | 0.001594315 | 0.023231445 | [CLEC3B]             |
| GO:0006531 | aspartate metabolic process                                     | 2           | 1          | 0.001594315 | 0.023231445 | [GOT2]               |
| GO:0030035 | microspike assembly                                             | 2           | 1          | 0.001594315 | 0.023231445 | [ACTN2]              |
| GO:0015908 | fatty acid transport                                            | 3           | 1          | 0.002390546 | 0.018756592 | [GOT2]               |
| GO:0006533 | aspartate catabolic process                                     | 3           | 1          | 0.002390546 | 0.018756592 | [GOT2]               |
| GO:0006950 | response to stress                                              | 104         | 2          | 0.003144315 | 0.020045006 | [HSPB6, RPS6KA3]     |
| GO:0043620 | regulation of DNA-dependent transcription in response to stress | 4           | 1          | 0.00318616  | 0.017104651 | [RPS6KA3]            |
| GO:0045647 | negative regulation of erythrocyte differentiation              | 4           | 1          | 0.00318616  | 0.017104651 | [MAFB]               |
| GO:0006810 | transport                                                       | 395         | 3          | 0.003824554 | 0.017732021 | [GOT2, NDUFB9, SDHD] |
| GO:0007155 | cell adhesion                                                   | 420         | 3          | 0.004537771 | 0.019285526 | [ACTN2, CD99, CDH13] |
| GO:0032869 | cellular response to insulin stimulus                           | 6           | 1          | 0.00477554  | 0.017396611 | [SLC2A4]             |
| GO:0002224 | toll-like receptor signaling pathway                            | 6           | 1          | 0.00477554  | 0.017396611 | [RPS6KA3]            |
| GO:0045184 | establishment of protein localization                           | 6           | 1          | 0.00477554  | 0.017396611 | [ANK3]               |
| GO:0045597 | positive regulation of cell differentiation                     | 7           | 1          | 0.005569307 | 0.015779703 | [RPS6KA3]            |
| GO:0015758 | glucose transport                                               | 7           | 1          | 0.005569307 | 0.015779703 | [SLC2A4]             |
| GO:0051924 | regulation of calcium ion transport                             | 7           | 1          | 0.005569307 | 0.015779703 | [PLN]                |
| GO:0071526 | semaphorin-plexin signaling pathway                             | 7           | 1          | 0.005569307 | 0.015779703 | [PLXND1]             |
| GO:0006103 | 2-oxoglutarate metabolic process                                | 7           | 1          | 0.005569307 | 0.015779703 | [GOT2]               |
| GO:0006536 | glutamate metabolic process                                     | 9           | 1          | 0.007154995 | 0.016972314 | [GOT2]               |
| GO:0045471 | response to ethanol                                             | 9           | 1          | 0.007154995 | 0.016972314 | [GOT2]               |
| GO:0006099 | tricarboxylic acid cycle                                        | 10          | 1          | 0.007946918 | 0.017246503 | [SDHD]               |
| GO:0045765 | regulation of angiogenesis                                      | 10          | 1          | 0.007946918 | 0.017246503 | [PLXND1]             |
| GO:0006936 | muscle contraction                                              | 12          | 1          | 0.009528923 | 0.019057847 | [MYH2]               |
| GO:0048041 | focal adhesion assembly                                         | 12          | 1          | 0.009528923 | 0.019057847 | [ACTN2]              |
| GO:0043542 | endothelial cell migration                                      | 13          | 1          | 0.010319007 | 0.019137067 | [PLXND1]             |
| GO:0030282 | bone mineralization                                             | 13          | 1          | 0.010319007 | 0.019137067 | [CLEC3B]             |
| GO:0005977 | glycogen metabolic process                                      | 14          | 1          | 0.011108478 | 0.019535599 | [PPP1R3B]            |

|            |                                                                                              |     |   |             |                       |
|------------|----------------------------------------------------------------------------------------------|-----|---|-------------|-----------------------|
| GO:0071560 | cellular response to transforming growth factor beta stimulus                                | 15  | 1 | 0.011897337 | 0.020225473 [CLEC3B]  |
| GO:0032496 | response to lipopolysaccharide                                                               | 17  | 1 | 0.013473222 | 0.022165624 [RPS6KA3] |
| GO:0007416 | synapse assembly                                                                             | 20  | 1 | 0.015832473 | 0.025233004 [PLXND1]  |
| GO:0030334 | regulation of cell migration                                                                 | 22  | 1 | 0.017402261 | 0.026894404 [PLXND1]  |
| GO:0051289 | protein homotetramerization                                                                  | 25  | 1 | 0.019752384 | 0.029199176 [ACTN2]   |
| GO:0043154 | negative regulation of cysteine-type endopeptidase activity<br>involved in apoptotic process | 25  | 1 | 0.019752384 | 0.029199176 [RPS6KA3] |
| GO:0001503 | ossification                                                                                 | 29  | 1 | 0.022877388 | 0.032409633 [CLEC3B]  |
| GO:0030307 | positive regulation of cell growth                                                           | 30  | 1 | 0.023657125 | 0.03260847 [RPS6KA3]  |
| GO:0008643 | carbohydrate transport                                                                       | 35  | 1 | 0.027546756 | 0.036970646 [SLC2A4]  |
| GO:0006096 | glycolysis                                                                                   | 37  | 1 | 0.029098389 | 0.03805174 [ENO3]     |
| GO:0006120 | mitochondrial electron transport, NADH to ubiquinone                                         | 42  | 1 | 0.032966958 | 0.042032872 [NDUFB9]  |
| GO:0006631 | fatty acid metabolic process                                                                 | 50  | 1 | 0.039125543 | 0.048668359 [HADHB]   |
| GO:0005975 | carbohydrate metabolic process                                                               | 58  | 1 | 0.045246021 | 0.054941597 [PPP1R3B] |
| GO:0042981 | regulation of apoptotic process                                                              | 65  | 1 | 0.050570359 | 0.059978798 [ACTN2]   |
| GO:0001525 | angiogenesis                                                                                 | 102 | 1 | 0.078237638 | 0.090684535 [PLXND1]  |
| GO:0043066 | negative regulation of apoptotic process                                                     | 118 | 1 | 0.089957813 | 0.101952188 [RPS6KA3] |
| GO:0007399 | nervous system development                                                                   | 214 | 1 | 0.157297823 | 0.174395413 [SEMA6C]  |
| GO:0044419 | interspecies interaction between organisms                                                   | 315 | 1 | 0.222915164 | 0.241886668 [SLC25A4] |
| GO:0007049 | cell cycle                                                                                   | 405 | 1 | 0.277183291 | 0.294507246 [RPS6KA3] |
| GO:0030154 | cell differentiation                                                                         | 484 | 1 | 0.321770097 | 0.33490357 [SEMA6C]   |
| GO:0008150 | biological_process                                                                           | 588 | 1 | 0.376411033 | 0.383939253 [NRAP]    |
| GO:0007275 | multicellular organismal development                                                         | 822 | 1 | 0.484177504 | 0.484177504 [SEMA6C]  |

---

Table S9-5. GO annotation analysis of the module eigengene in five prenatal highly LT-specific modules (LT\_yellowgreen).

| GO ID      | GO Name                                                   | Total Count | Diff Count | P Value     | FDR         | Gene           |
|------------|-----------------------------------------------------------|-------------|------------|-------------|-------------|----------------|
| GO:0045657 | positive regulation of monocyte differentiation           | 1           | 1          | 0.000227848 | 0.005012646 | [ACIN1]        |
| GO:0006607 | NLS-bearing substrate import into nucleus                 | 2           | 1          | 0.000455648 | 0.005012132 | [DAG1]         |
| GO:0043409 | negative regulation of MAPK cascade                       | 3           | 1          | 0.000683402 | 0.004295672 | [DAG1]         |
| GO:0030263 | apoptotic chromosome condensation                         | 3           | 1          | 0.000683402 | 0.004295672 | [ACIN1]        |
| GO:0003009 | skeletal muscle contraction                               | 4           | 1          | 0.00091111  | 0.004008883 | [TNNI2]        |
| GO:0034453 | microtubule anchoring                                     | 5           | 1          | 0.00113877  | 0.0038543   | [DAG1]         |
| GO:0007016 | cytoskeletal anchoring at plasma membrane                 | 5           | 1          | 0.00113877  | 0.0038543   | [DAG1]         |
| GO:0019048 | virus-host interaction                                    | 7           | 1          | 0.001593952 | 0.004383367 | [DAG1]         |
| GO:0006509 | membrane protein ectodomain proteolysis                   | 8           | 1          | 0.001821472 | 0.004452488 | [DAG1]         |
| GO:0045893 | positive regulation of transcription, DNA-dependent       | 334         | 2          | 0.002495591 | 0.0054903   | [MED12, TNNI2] |
| GO:0051898 | negative regulation of protein kinase B signaling cascade | 12          | 1          | 0.002731088 | 0.005224691 | [DAG1]         |
| GO:0030518 | intracellular steroid hormone receptor signaling pathway  | 12          | 1          | 0.002731088 | 0.005224691 | [MED12]        |
| GO:0030218 | erythrocyte differentiation                               | 13          | 1          | 0.002958376 | 0.005006482 | [ACIN1]        |
| GO:0030178 | negative regulation of Wnt receptor signaling pathway     | 17          | 1          | 0.003867059 | 0.006076807 | [MED12]        |
| GO:0006367 | transcription initiation from RNA polymerase II promoter  | 23          | 1          | 0.005228687 | 0.007668741 | [MED12]        |
| GO:0030336 | negative regulation of cell migration                     | 30          | 1          | 0.006815135 | 0.009370811 | [DAG1]         |
| GO:0030521 | androgen receptor signaling pathway                       | 38          | 1          | 0.008625431 | 0.011162322 | [MED12]        |
| GO:0005975 | carbohydrate metabolic process                            | 58          | 1          | 0.013138184 | 0.01605778  | [PYGM]         |
| GO:0006950 | response to stress                                        | 104         | 1          | 0.023447433 | 0.027149659 | [HSPB8]        |
| GO:0008219 | cell death                                                | 136         | 1          | 0.03056181  | 0.033617991 | [HSPB8]        |
| GO:0044419 | interspecies interaction between organisms                | 315         | 1          | 0.069504634 | 0.072814379 | [DAG1]         |
| GO:0008150 | biological_process                                        | 588         | 1          | 0.126191315 | 0.126191315 | [HSPB8]        |

Table S10-1. Module eigengene and its evolutionary rates in 15 postnatal highly LDE-specific modules (LDE\_black).

| pig_Genebank   | pig_Gene  | LDE Module | kTotal | kWithin | eigencorr | eigenpval | meanExpr | LTModule        | Ka/Ks  |
|----------------|-----------|------------|--------|---------|-----------|-----------|----------|-----------------|--------|
| AF288822.1     | EIF4G2    | black      | 781.53 | 107.525 | 0.99717   | 0.00018   | 50.062   | darkgreen       | --     |
| NM_001042375.1 | ITM2B     | black      | 808.6  | 96.2529 | 0.97339   | 0.00519   | 259.792  | turquoise       | 0.2074 |
| AK230784.1     | NDUFA5    | black      | 928.86 | 96.2469 | 0.97207   | 0.00558   | 90.554   | lightcyan       | --     |
| AK240469.1     | CTNNA1    | black      | 724.66 | 101.258 | 0.98481   | 0.00224   | 3.702    | white           | 0      |
| AK230971.1     | MATR3     | black      | 659.18 | 98.8046 | 0.97921   | 0.00359   | 11.158   | darkred         | 0      |
| AK237701.1     | ZNF655    | black      | 882.7  | 104.508 | 0.99042   | 0.00112   | 5.512    | blue            | 99     |
| AK231179.1     | DDR1      | black      | 694.8  | 100.285 | 0.98288   | 0.00268   | 12.568   | ngnyello        | --     |
| AK235131.1     | U2AF1     | black      | 912.46 | 103.985 | 0.9894    | 0.00131   | 40.874   | grey60          | --     |
| AK238804.1     | DYNC1I2   | black      | 935.14 | 100.554 | 0.98194   | 0.00291   | 12.454   | white           | 0      |
| AK232538.1     | LONP1     | black      | 728.21 | 90.4931 | 0.96185   | 0.00889   | 19.392   | turquoise       | 99     |
| AK232688.1     | ABCF3     | black      | 777.01 | 103.917 | 0.99002   | 0.00119   | 11.382   | grey60          | 0      |
| AK239087.1     | MFF       | black      | 797.74 | 105.035 | 0.99236   | 0.0008    | 4.398    | yellow          | 99     |
| AK236321.1     | CCT5      | black      | 931.44 | 100.761 | 0.98228   | 0.00283   | 4.848    | turquoise       | --     |
| AK239257.1     | CPSF7     | black      | 843.74 | 104.21  | 0.99002   | 0.0012    | 11.37    | turquoise       | --     |
| AK230529.1     | ABI1      | black      | 897.11 | 103.703 | 0.98856   | 0.00147   | 6.568    | purple          | 99     |
| AK236418.1     | PAF1      | black      | 684.95 | 96.1495 | 0.97387   | 0.00505   | 12.39    | turquoise       | 99     |
| AK239385.1     | UTP18     | black      | 722.17 | 100.247 | 0.98249   | 0.00277   | 17.748   | darkorang<br>e  | 0.1679 |
| AK239707.1     | TMEM179B  | black      | 891.09 | 103.381 | 0.98872   | 0.00144   | 19.85    | turquoise       | --     |
| AK239710.1     | PRPSAP1   | black      | 648.01 | 95.8485 | 0.97348   | 0.00516   | 3.632    | black           | 0      |
| AK236573.1     | SPTBN1    | black      | 810.81 | 108.844 | 0.99967   | 7.18E-06  | 11.844   | darkgreen       | --     |
| AK236660.1     | CSNK1E    | black      | 817.62 | 92.6698 | 0.96562   | 0.00761   | 17.412   | tan             | 0      |
| AK239758.1     | RNPS1     | black      | 882.68 | 106.681 | 0.99495   | 0.00043   | 19.42    | blue            | --     |
| AK239858.1     | CD99      | black      | 842.02 | 108.279 | 0.99838   | 7.86E-05  | 38.728   | turquoise       | --     |
| AK239890.1     | SRP68     | black      | 744.42 | 100.325 | 0.98295   | 0.00266   | 27.228   | turquoise       | 0.1645 |
| AK233343.1     | RBM10     | black      | 818.8  | 103.584 | 0.98928   | 0.00133   | 39.262   | darkmagen<br>ta | 0      |
| AK233652.1     | FZD4      | black      | 617.77 | 94.2642 | 0.96959   | 0.00634   | 29.622   | turquoise       | --     |
| AK240345.1     | OGDH      | black      | 703.19 | 94.2175 | 0.97014   | 0.00617   | 97.352   | turquoise       | 99     |
| NM_001044575.2 | IDH3B     | black      | 903.4  | 101.749 | 0.98527   | 0.00214   | 74.618   | black           | 0      |
| NM_001044582.1 | ZRANB2    | black      | 836.34 | 104.572 | 0.99134   | 0.00097   | 39.268   | violet          | 99     |
| NM_001114275.1 | NCOA2     | black      | 504.44 | 78.0044 | 0.92864   | 0.02264   | 4.098    | blue            | 0.0967 |
| NM_001123101.1 | TBRG4     | black      | 698.09 | 103.328 | 0.98874   | 0.00143   | 34.612   | violet          | 99     |
| NM_001129954.1 | RPS20     | black      | 637.38 | 90.1724 | 0.96093   | 0.00921   | 1460.098 | blue            | --     |
| XM_001926549.1 | FERMT2    | black      | 814.44 | 105.164 | 0.99227   | 0.00081   | 58.406   | red             | 0      |
| XM_001927513.1 | MPHOSPH10 | black      | 804.04 | 107.103 | 0.99627   | 0.00027   | 8.916    | grey60          | 99     |
| XM_001924618.1 | TRAM1     | black      | 735.11 | 104.885 | 0.99199   | 0.00086   | 28.946   | darkgrey        | 99     |
| XM_001927666.1 | NDUFS2    | black      | 943.17 | 96.6511 | 0.97333   | 0.00521   | 155.17   | blue            | 0      |
| XM_001927000.1 | LUM       | black      | 914.05 | 102.742 | 0.98653   | 0.00187   | 15.938   | darkgrey        | 0.1529 |
| XM_001929118.1 | TOX4      | black      | 854.38 | 103.572 | 0.98918   | 0.00135   | 10.732   | tan             | 0      |
| XM_001929613.1 | RXRB      | black      | 771    | 105.182 | 0.9926    | 0.00076   | 10.72    | violet          | 0      |
| XM_001929571.1 | PI16      | black      | 872.65 | 107.192 | 0.996     | 0.0003    | 6.92     | darkred         | 0.8208 |
| XM_001924481.1 | SEC61A1   | black      | 859.27 | 107.216 | 0.99607   | 0.0003    | 11.298   | turquoise       | 0      |
| XM_001928536.1 | GADD45G   | black      | 615.87 | 93.58   | 0.96728   | 0.00707   | 32.348   | turquoise       | 99     |
| XM_001925435.1 | RBM34     | black      | 637.43 | 95.7831 | 0.9725    | 0.00545   | 6.358    | brown           | 0.3836 |

|                |         |       |        |         |         |          |        |               |        |
|----------------|---------|-------|--------|---------|---------|----------|--------|---------------|--------|
| XM_001929322.1 | ANK3    | black | 687.46 | 100.465 | 0.98289 | 0.00268  | 39.034 | royalblue     | 0.1356 |
| XM_001928193.1 | SEC24C  | black | 898.77 | 101.191 | 0.98315 | 0.00262  | 10.908 | turquoise     | 0.4432 |
| XM_001928374.1 | NDST2   | black | 891.23 | 104.103 | 0.98943 | 0.0013   | 15.546 | darkmagenta   | 99     |
| XM_001927712.1 | DDX55   | black | 723.78 | 100.43  | 0.98319 | 0.00261  | 24.2   | turquoise     | 0.1968 |
| XM_001926788.1 | PRPF40A | black | 684.23 | 91.9815 | 0.96528 | 0.00773  | 20.748 | blue          | 99     |
| EU714326.1     | KDR     | black | 719.62 | 104.555 | 0.99116 | 0.001    | 3.06   | yellow        | 0      |
| AF490841.1     | GLS     | black | 840.33 | 105.607 | 0.99295 | 0.00071  | 19.942 | turquoise     | 99     |
| NM_001136510.1 | NFS1    | black | 858.19 | 91.6007 | 0.96239 | 0.0087   | 28.856 | pink          | 0      |
| NM_213928.1    | GOT2    | black | 901.27 | 103.229 | 0.98807 | 0.00156  | 49.376 | darkred       | 0.0782 |
| NM_213927.1    | GOT1    | black | 756.9  | 101.19  | 0.98461 | 0.00229  | 65.686 | pink          | 0      |
| NM_213901.1    | PCCB    | black | 722.27 | 104.07  | 0.99021 | 0.00116  | 3.39   | brown         | 0      |
| NM_213976.1    | CD163   | black | 729.95 | 100.994 | 0.98435 | 0.00235  | 6.192  | blue          | --     |
| NM_213980.1    | UGP2    | black | 769.21 | 102.228 | 0.98669 | 0.00184  | 63.336 | turquoise     | 0      |
| NM_214333.1    | RPN1    | black | 831.64 | 108.689 | 0.99921 | 2.64E-05 | 33.152 | skyblue       | 0.1147 |
| NM_214364.1    | VDAC3   | black | 768.03 | 107.949 | 0.99798 | 0.00011  | 28.87  | greenyellow   | --     |
| NM_214372.1    | APP     | black | 761.02 | 102.104 | 0.98644 | 0.00189  | 34.022 | darkturquoise | 0      |
| AY609530.1     | SC65    | black | 654.01 | 93.9533 | 0.96863 | 0.00664  | 8.09   | turquoise     | 0      |
| AY609970.1     | BPNT1   | black | 850.29 | 108.157 | 0.99816 | 9.45E-05 | 4.302  | white         | 0.0723 |
| AY609644.1     | CNIH4   | black | 859.04 | 102.935 | 0.98746 | 0.00168  | 17.168 | blue          | 99     |
| NM_001005726.1 | ANXA2   | black | 835.65 | 100.979 | 0.98332 | 0.00258  | 56.298 | turquoise     | 0.3622 |
| NM_001038644.1 | ANGPTL4 | black | 665.56 | 97.007  | 0.97534 | 0.00463  | 17.21  | turquoise     | 99     |
| BX666608       |         | black | 943.41 | 96.507  | 0.97272 | 0.00539  | 7.24   | tan           | --     |
| BX669885       |         | black | 814.88 | 108.484 | 0.99895 | 4.08E-05 | 29.644 | yellow        | 99     |
| BX674131       |         | black | 645.62 | 98.3957 | 0.97806 | 0.00389  | 11.888 | turquoise     | --     |
| BX674519       |         | black | 849.52 | 108.299 | 0.99843 | 7.45E-05 | 10.93  | purple        | 0      |
| BX675006       |         | black | 915.01 | 102.271 | 0.98619 | 0.00194  | 13.94  | greenyellow   | --     |
| BX675465       |         | black | 848.79 | 107.593 | 0.99717 | 0.00018  | 3.01   | yellow        | --     |
| BX675880       |         | black | 908.67 | 102.121 | 0.9858  | 0.00203  | 10.146 | magenta       | --     |
| BP440119       |         | black | 795.55 | 108.042 | 0.99817 | 9.38E-05 | 2.46   | white         | --     |
| CK453192       |         | black | 826.54 | 106.509 | 0.99519 | 0.0004   | 15.7   | turquoise     | --     |
| CK459106       |         | black | 927.68 | 99.9988 | 0.98052 | 0.00326  | 9.106  | grey60        | 99     |
| CK459361       |         | black | 803.29 | 108.676 | 0.99936 | 1.96E-05 | 10.864 | darkgrey      | --     |
| CK464458       |         | black | 852.39 | 106.166 | 0.99439 | 0.0005   | 8.462  | lightcyan     | --     |
| CK467496       |         | black | 829.63 | 105.217 | 0.99267 | 0.00075  | 12.454 | royalblue     | --     |
| BX915635       |         | black | 592.89 | 88.6193 | 0.9559  | 0.01104  | 1.26   | black         | --     |
| BX917599       |         | black | 601.9  | 89.0649 | 0.95714 | 0.01058  | 23.852 | black         | 0      |
| BX917687       |         | black | 746.61 | 103.991 | 0.99029 | 0.00115  | 59.016 | salmon        | --     |
| BX918145       |         | black | 871.24 | 106.844 | 0.99527 | 0.00039  | 72.476 | grey60        | --     |
| BX919338       |         | black | 722.13 | 104.914 | 0.99205 | 0.00085  | 4.928  | grey60        | 99     |
| CN156156       |         | black | 691.16 | 100.58  | 0.98293 | 0.00267  | 2.88   | white         | --     |
| CN156410       |         | black | 928.46 | 99.4945 | 0.97939 | 0.00354  | 8.488  | navy          | 0      |
| CN156471       |         | black | 781.52 | 92.6689 | 0.96574 | 0.00757  | 23.758 | turquoise     | --     |
| CN156513       |         | black | 615.46 | 90.214  | 0.95988 | 0.00959  | 0.862  | lightyellow   | --     |
| CN157824       |         | black | 893.88 | 103.045 | 0.98727 | 0.00172  | 20.872 | turquoise     | --     |
| CN158780       |         | black | 836.85 | 102.307 | 0.98614 | 0.00195  | 44.948 | turquoise     | --     |
| CN159900       |         | black | 714.97 | 94.4704 | 0.97069 | 0.006    | 3.824  |               | --     |
| CN161458       |         | black | 804.71 | 102.09  | 0.98602 | 0.00198  | 64.432 | blue          | --     |

|          |      |       |        |         |         |          |         |                   |        |
|----------|------|-------|--------|---------|---------|----------|---------|-------------------|--------|
| CN161563 |      | black | 942.99 | 98.8177 | 0.97813 | 0.00387  | 24.364  | blue              | --     |
| CJ009698 |      | black | 527.83 | 81.5103 | 0.93771 | 0.01849  | 5.854   | turquoise         | 0.1364 |
| CJ029380 |      | black | 646.89 | 96.5461 | 0.9745  | 0.00487  | 9.934   | turquoise         | --     |
| DN101782 |      | black | 713.56 | 102.056 | 0.98615 | 0.00195  | 17.61   | ngnyeno<br>w      | 0      |
| DN106073 |      | black | 930.89 | 95.0793 | 0.9694  | 0.00639  | 16.624  | yellow            | --     |
| DN117259 |      | black | 933.47 | 100.418 | 0.98153 | 0.003    | 22.586  | turquoise         | --     |
| DN117899 |      | black | 767.91 | 103.526 | 0.98932 | 0.00132  | 14.188  | blue              | 99     |
| DN119433 |      | black | 693.32 | 99.8669 | 0.98183 | 0.00293  | 16.842  | purple            | --     |
| DN123035 |      | black | 835.82 | 108.186 | 0.99817 | 9.37E-05 | 3.398   | yellow            | --     |
| AJ944251 |      | black | 865.15 | 96.8644 | 0.97421 | 0.00495  | 23.946  | tan               | --     |
| CV876303 |      | black | 723.13 | 104.772 | 0.99173 | 0.0009   | 1.314   | turquoise         | --     |
| DY406144 |      | black | 771.44 | 98.9338 | 0.97992 | 0.00341  | 5.19    | ngnyeno<br>w      | --     |
| DB784140 |      | black | 610.22 | 92.0229 | 0.96451 | 0.00798  | 9.19    | blue              | --     |
| AK230614 | CD36 | black | 533.74 | 82.7755 | 0.94093 | 0.01708  | 9.834   | darkgrey          | 0.3146 |
| DT324725 |      | black | 774    | 107.309 | 0.99676 | 0.00022  | 12.236  | turquoise         | --     |
| DT324752 |      | black | 934.9  | 100.321 | 0.98141 | 0.00303  | 10.494  | purple            | --     |
| DT331317 |      | black | 611.95 | 89.9945 | 0.95933 | 0.00978  | 3.58    | black             | 0      |
| EW056660 |      | black | 685.88 | 101.543 | 0.98496 | 0.00221  | 5.222   | blue              | --     |
| EW155747 |      | black | 596.44 | 92.0835 | 0.96375 | 0.00824  | 6.484   | darkgrey          | --     |
| EW266972 |      | black | 915.55 | 99.1845 | 0.97869 | 0.00372  | 3.772   | darkgreen         | --     |
| EW301848 |      | black | 669.31 | 98.6173 | 0.97925 | 0.00358  | 39.996  | blue              | --     |
| EW422118 |      | black | 905.38 | 100.851 | 0.98253 | 0.00276  | 23.73   | greenyello<br>w   | --     |
| EW526188 |      | black | 874.59 | 102.806 | 0.98681 | 0.00181  | 17.466  | blue              | --     |
| EW619519 |      | black | 913.13 | 103.328 | 0.9878  | 0.00162  | 199.596 | turquoise         | --     |
| EW623428 |      | black | 600.55 | 92.9563 | 0.96583 | 0.00754  | 12.102  | grey60            | --     |
| EW633584 |      | black | 907.47 | 102.243 | 0.98627 | 0.00193  | 28.73   | turquoise         | 0.7251 |
| EH005985 |      | black | 941.84 | 98.83   | 0.97819 | 0.00385  | 6.618   | darkturquo<br>ise | --     |
| EH006647 |      | black | 819.77 | 107.896 | 0.99769 | 0.00013  | 1.112   | lightgreen        | --     |
| BQ597564 |      | black | 741.94 | 105.504 | 0.99324 | 0.00067  | 9.492   | darkgrey          | --     |
| BI186101 |      | black | 896.25 | 104.306 | 0.98985 | 0.00123  | 2.084   |                   | --     |

Table S10-2. Module eigengene and its evolutionary rates in 15 postnatal highly LDE-specific modules (LDE\_blue).

| pig_Genebank   | pig_Gene | LDE Module | kTotal   | kWithin | eigencorr | eigenpval | meanExpr | LTModule    | Ka/Ks |
|----------------|----------|------------|----------|---------|-----------|-----------|----------|-------------|-------|
| NM_001044576.1 | NCOR2    | blue       | 711.8619 | 140.112 | 0.980535  | 0.00325   | 22.344   | lightyellow | 0.075 |
| AK234174.1     | TMEM222  | blue       | 728.1961 | 115.905 | 0.935678  | 0.01939   | 14.574   | violet      | 99    |
| AK234195.1     | LRPPRC   | blue       | 947.6861 | 140.767 | 0.979587  | 0.00349   | 4.464    | darkred     | 0.138 |
| AK234286.1     | PER1     | blue       | 362.9855 | 87.2395 | 0.874123  | 0.05259   | 41.852   | black       | 99    |
| AK234337.1     | TBC1D17  | blue       | 582.4931 | 112.976 | 0.933048  | 0.02059   | 13.85    | darkmagenta | 99    |
| AK230834.1     | TAF12    | blue       | 676.3208 | 136.625 | 0.976132  | 0.00441   | 21.91    | black       | --    |
| AK230893.1     | NECAP1   | blue       | 695.4454 | 142.831 | 0.986556  | 0.00187   | 9.226    | darkmagenta | --    |
| AK234386.1     | SFT2D1   | blue       | 391.5872 | 90.253  | 0.883185  | 0.04708   | 16.108   | grey        | 0.225 |
| AK237684.1     | PRKAG2   | blue       | 919.0855 | 149.862 | 0.994116  | 0.00054   | 11.368   | blue        | 0     |
| AK237699.1     | ZDHC18   | blue       | 312.4915 | 67.2627 | 0.819155  | 0.08977   | 4.73     | turquoise   | --    |
| AK237762.1     | DCTN1    | blue       | 809.6531 | 151.673 | 0.998719  | 5.5E-05   | 22.28    | turquoise   | 0     |
| AK231325.1     | DDX27    | blue       | 954.1155 | 135.498 | 0.970078  | 0.00619   | 5.398    | blue        | 0.35  |
| AK234837.1     | C2orf29  | blue       | 675.402  | 84.0399 | 0.866152  | 0.05759   | 22.73    | turquoise   | --    |
| AK238002.1     | CDC42EP1 | blue       | 368.8324 | 73.5205 | 0.840082  | 0.0749    | 11.468   | blue        | 99    |
| AK231733.1     | NDUFA10  | blue       | 917.9908 | 130.137 | 0.959991  | 0.00955   | 47.492   | turquoise   | 0.263 |
| AK235011.1     | NET1     | blue       | 794.1531 | 132.086 | 0.96537   | 0.0077    | 18.008   | turquoise   | 0     |
| AK235117.1     | RIOK3    | blue       | 568.9435 | 102.337 | 0.908546  | 0.03274   | 67.994   | turquoise   | --    |
| AK231946.1     | PXDN     | blue       | 620.0112 | 88.9984 | 0.884354  | 0.04638   | 14.46    | blue        | --    |
| AK235252.1     | MRPS35   | blue       | 509.9605 | 91.5051 | 0.884307  | 0.04641   | 14.144   | red         | 0.386 |
| AK235264.1     | MLYCD    | blue       | 817.7713 | 151.612 | 0.998176  | 9.4E-05   | 9.648    | turquoise   | --    |
| AK235336.1     | CLPTMIL  | blue       | 885.076  | 142.402 | 0.982549  | 0.00276   | 10.612   | blue        | 99    |
| AK231959.1     | CRIP2    | blue       | 544.9288 | 111.063 | 0.929095  | 0.02242   | 26.11    | red         | --    |
| AK238521.1     | MCAT     | blue       | 548.8683 | 122.463 | 0.950745  | 0.01302   | 3.912    | violet      | 99    |
| AK232242.1     | KLHDC3   | blue       | 584.0209 | 109.742 | 0.925868  | 0.02396   | 130.588  | navy        | --    |
| AK232271.1     | PHB2     | blue       | 742.8461 | 136.125 | 0.97392   | 0.00504   | 74.618   | grey60      | 0     |
| AK235752.1     | TRAP1    | blue       | 803.5468 | 147.94  | 0.992665  | 0.00075   | 21.066   | turquoise   | 99    |
| AK238694.1     | GRPEL1   | blue       | 469.0041 | 73.383  | 0.837373  | 0.07678   | 30.546   | blue        | 0     |
| AK235894.1     | GNL3L    | blue       | 942.6867 | 139.755 | 0.977884  | 0.00394   | 13.824   | grey60      | 0.102 |
| AK238836.1     | EIF4H    | blue       | 522.0341 | 115.046 | 0.93761   | 0.01853   | 118.318  | blue        | --    |
| AK236053.1     | BRE      | blue       | 782.8505 | 150.737 | 0.997499  | 0.00015   | 7.59     | turquoise   | --    |
| AK238961.1     | AES      | blue       | 618.6693 | 128.335 | 0.962901  | 0.00853   | 75.646   | orange      | --    |
| AK239104.1     | PRPF8    | blue       | 654.7377 | 77.8775 | 0.846449  | 0.07054   | 27.258   | tan         | 0     |
| AK236182.1     | NDUFS1   | blue       | 738.8087 | 109.95  | 0.924352  | 0.02469   | 116.754  | brown       | 0.121 |
| AK236235.1     | ACP2     | blue       | 684.6111 | 125.644 | 0.956321  | 0.01089   | 6.838    | tan         | 0.171 |
| AK236339.1     | PSMD2    | blue       | 860.8467 | 130.994 | 0.963278  | 0.0084    | 82.006   | tan         | 99    |
| AK239282.1     | STARD7   | blue       | 846.72   | 140.753 | 0.980758  | 0.00319   | 41.632   | blue        | 0     |
| AK236459.1     | BOP1     | blue       | 567.587  | 106.005 | 0.916603  | 0.02855   | 11.562   | violet      | 99    |
| AK232788.1     | LONP2    | blue       | 567.5199 | 114.82  | 0.937741  | 0.01847   | 26.182   | white       | 99    |
| AK232832.1     |          | blue       | 935.1136 | 144.994 | 0.986217  | 0.00194   | 2.656    | darkgrey    | --    |
| AK239601.1     | ACOT1    | blue       | 874.3797 | 133.502 | 0.966517  | 0.00732   | 31.152   | black       | --    |
| AK239677.1     | WIPI2    | blue       | 979.0333 | 119.963 | 0.940314  | 0.01735   | 20.93    | sienna3     | 0     |
| AK232979.1     | MRPS5    | blue       | 962.9634 | 137.216 | 0.972387  | 0.00549   | 19.366   | tan         | 0     |
| AK233000.1     | NAPA     | blue       | 593.0269 | 119.866 | 0.945575  | 0.01512   | 56.898   | blue        | 99    |
| AK233005.1     | ADPRHL2  | blue       | 799.8887 | 138.132 | 0.97558   | 0.00456   | 4.982    | tan         | 0     |
| AK233047.1     | BRP44L   | blue       | 723.9722 | 137.355 | 0.977782  | 0.00396   | 314.876  | turquoise   | --    |
| AK236699.1     | FSCN1    | blue       | 840.5049 | 150.044 | 0.995358  | 0.00038   | 0.79     | lightgreen  | 99    |

|                |          |      |          |         |          |         |          |               |       |
|----------------|----------|------|----------|---------|----------|---------|----------|---------------|-------|
| AK233231.1     | NDUFS8   | blue | 394.4282 | 77.0821 | 0.848024 | 0.06948 | 320.59   | red           | --    |
| AK240009.1     | NCLN     | blue | 972.2354 | 132.526 | 0.964749 | 0.0079  | 5.6      | lightyellow   | --    |
| AK233419.1     | SLC25A4  | blue | 842.1794 | 141.916 | 0.98253  | 0.00276 | 1366.408 | turquoise     | 0     |
| AK233680.1     | MRPL36   | blue | 360.5506 | 81.6222 | 0.861188 | 0.06077 | 6.348    | grey60        | 99    |
| AK240262.1     | CLEC3B   | blue | 645.6378 | 136.872 | 0.975959 | 0.00446 | 27.836   | lightcyan     | --    |
| NM_001078679.1 | CD81     | blue | 977.7803 | 130.92  | 0.961669 | 0.00896 | 5.358    | grey60        | --    |
| NM_213946.2    | FHL3     | blue | 908.6444 | 140.26  | 0.979039 | 0.00363 | 144.588  | blue          | --    |
| NM_001097420.1 | EPAS1    | blue | 815.6891 | 151.559 | 0.998147 | 9.6E-05 | 5.734    | darkturquoise | 0     |
| NM_001105296.1 | RAE1     | blue | 666.4391 | 131.064 | 0.966151 | 0.00744 | 9.986    | tan           | 0     |
| NM_001099936.1 | BTG1     | blue | 674.2153 | 120.725 | 0.948204 | 0.01404 | 32.74    | turquoise     | 99    |
| EU009401.2     | PNPLA2   | blue | 908.9084 | 150.44  | 0.995558 | 0.00036 | 13.862   | blue          | 0.084 |
| NM_001123213.1 | VAPB     | blue | 907.5916 | 150.431 | 0.995572 | 0.00035 | 47.842   | black         | 99    |
| NM_001123198.1 | ST7      | blue | 830.0159 | 148.855 | 0.994369 | 0.00051 | 8.504    | blue          | 0     |
| NM_001123104.1 | CTSZ     | blue | 371.1919 | 77.1001 | 0.851079 | 0.06743 | 22.016   | turquoise     | 0.135 |
| XM_001926626.1 | C9orf123 | blue | 964.9778 | 144.801 | 0.985307 | 0.00213 | 10.3     | red           | --    |
| XM_001925462.1 | CPSF1    | blue | 393.2081 | 91.4359 | 0.88621  | 0.04528 | 21.496   | tan           | 0     |
| XM_001924535.1 | ASAP1    | blue | 478.7791 | 109.233 | 0.925152 | 0.0243  | 7.206    | blue          | 0     |
| XM_001929031.1 | ATP1A2   | blue | 937.8728 | 141.384 | 0.980944 | 0.00315 | 32.292   | darkturquoise | 0     |
| XM_001927806.1 | PRPF38B  | blue | 892.6852 | 131.086 | 0.962651 | 0.00862 | 26.716   | turquoise     | 0     |
| XM_001927255.1 | TCEA1    | blue | 988.2354 | 135.142 | 0.968591 | 0.00665 | 7.076    | turquoise     | 0.131 |
| XM_001925928.1 | CEBPD    | blue | 631.4072 | 134.672 | 0.97242  | 0.00548 | 87.986   | turquoise     | 0     |
| XM_001925252.1 | ITGA5    | blue | 918.406  | 142.652 | 0.982395 | 0.0028  | 5.07     | lightyellow   | 0     |
| XM_001927127.1 | SLC38A2  | blue | 890.5909 | 152.079 | 0.998153 | 9.5E-05 | 48.608   | turquoise     | --    |
| XM_001925445.1 | KIAA0528 | blue | 917.7332 | 150.121 | 0.994833 | 0.00045 | 11.596   | red           | --    |
| XM_001929074.1 | PTGR2    | blue | 841.2543 | 149.025 | 0.994    | 0.00056 | 49.842   | turquoise     | 0.202 |
| XM_001925833.1 | IPO4     | blue | 996.4562 | 132.951 | 0.964618 | 0.00795 | 9.872    | white         | 0     |
| XM_001929568.1 | SLC29A1  | blue | 764.7073 | 149.348 | 0.995901 | 0.00031 | 18.646   | blue          | 0.29  |
| XM_001929570.1 | HSP90AB1 | blue | 542.1271 | 88.7429 | 0.875714 | 0.05161 | 260.05   | turquoise     | 0     |
| XM_001927338.1 | IDH3A    | blue | 960.3707 | 138.67  | 0.975287 | 0.00465 | 185.96   | red           | 0.176 |
| XM_001929415.1 | FKBP5    | blue | 647.4752 | 136.028 | 0.976047 | 0.00443 | 7.018    | violet        | 0     |
| XM_001928742.1 | POSTN    | blue | 902.5341 | 150.395 | 0.995115 | 0.00041 | 19.812   | turquoise     | 0.041 |
| XM_001927648.1 | MTG1     | blue | 515.1122 | 72.8557 | 0.841192 | 0.07413 | 14.07    | blue          | 99    |
| XM_001929110.1 | ZFYVE27  | blue | 757.6057 | 147.466 | 0.992831 | 0.00073 | 7.522    | grey60        | 0.196 |
| XM_001927395.1 | SFXN4    | blue | 933.7867 | 143.407 | 0.983743 | 0.00248 | 19.998   | darkmagenta   | 0.881 |
| XM_001924717.1 |          | blue | 847.47   | 140.219 | 0.979986 | 0.00339 | 16.03    | turquoise     | 99    |
| XM_001925999.1 | VPS26A   | blue | 311.4586 | 60.6712 | 0.794068 | 0.10865 | 17.798   | turquoise     | 99    |
| XM_001928164.1 | NUP133   | blue | 867.6606 | 151.267 | 0.997242 | 0.00017 | 4.606    | grey60        | 0.039 |
| XM_001925659.1 | REEP3    | blue | 760.3197 | 125.607 | 0.953456 | 0.01197 | 3.734    | yellow        | 99    |
| XM_001926896.1 | ERP29    | blue | 933.6651 | 136.469 | 0.971843 | 0.00565 | 15.704   | lightcyan     | 99    |
| XM_001929345.1 | CORO1C   | blue | 983.2891 | 132.629 | 0.964358 | 0.00803 | 8.904    | blue          | 99    |
| XM_001925978.1 | EWSR1    | blue | 778.387  | 144.586 | 0.987742 | 0.00163 | 19.756   | turquoise     | --    |
| XM_001929539.1 | PPIL2    | blue | 839.4861 | 142.231 | 0.983017 | 0.00265 | 5.072    | black         | 0     |
| XM_001925613.1 | USP40    | blue | 721.5942 | 145.148 | 0.989099 | 0.00136 | 1.824    | white         | --    |
| XM_001926406.1 | ACOT9    | blue | 944.1672 | 139.727 | 0.976776 | 0.00423 | 21.8     | grey60        | 0     |
| XM_001925991.1 | STAG2    | blue | 913.5807 | 150.604 | 0.995628 | 0.00035 | 2.094    | darkred       | 0     |
| NM_001130531.1 | ADAM10   | blue | 866.2629 | 148.062 | 0.99194  | 0.00087 | 1.246    | lightgreen    | 99    |
| NM_214223.2    | THOP1    | blue | 582.2376 | 111.062 | 0.929779 | 0.0221  | 5.566    | grey60        | 0     |
| NM_001142668.1 | DKC1     | blue | 848.5236 | 148.008 | 0.993013 | 0.0007  | 7.682    | violet        | 99    |
| NM_001142666.1 | TEAD4    | blue | 532.3492 | 99.9048 | 0.905789 | 0.03422 | 19.924   | skyblue       | 0     |
| AY421755.1     | HMOX2    | blue | 542.9362 | 124.145 | 0.954382 | 0.01162 | 3.106    | grey60        | --    |
| NM_213904.1    | GANAB    | blue | 921.1179 | 142.106 | 0.981189 | 0.00309 | 15.414   | black         | 0     |



|             |         |      |          |         |          |         |          |              |       |
|-------------|---------|------|----------|---------|----------|---------|----------|--------------|-------|
| NM_213962.1 | HADHA   | blue | 959.0588 | 146.038 | 0.987424 | 0.00169 | 121.492  | turquoise    | 0.143 |
| NM_214031.1 | ENG     | blue | 905.8497 | 151.106 | 0.996268 | 0.00027 | 9.49     | white        | 0.058 |
| NM_214062.1 | DLD     | blue | 958.2527 | 136.631 | 0.972355 | 0.00549 | 70.504   | yellow       | 0     |
| NM_214200.1 | PLIN2   | blue | 946.6493 | 147.299 | 0.989617 | 0.00127 | 5.728    | blue         | 0.13  |
| NM_214230.1 | TNC     | blue | 570.4484 | 119.125 | 0.943046 | 0.01618 | 1.164    | blue         | 0.155 |
| NM_214323.1 | JUP     | blue | 639.7396 | 125.732 | 0.954969 | 0.01139 | 4.032    | royalblue    | 0     |
| NM_214375.1 | FHL1    | blue | 938.4858 | 144.818 | 0.986295 | 0.00192 | 527.014  | turquoise    | 0     |
| NM_214397.1 | DLST    | blue | 947.1611 | 140.074 | 0.978477 | 0.00378 | 40.92    | violet       | 99    |
| NM_214418.1 | SLC25A6 | blue | 600.0459 | 130.629 | 0.96612  | 0.00745 | 54.658   | sienna3      | --    |
| AY609425.1  | NUDCD2  | blue | 472.4585 | 60.5893 | 0.80893  | 0.09733 | 32.048   | purple       | 0     |
| AY609525.1  | CBX3    | blue | 997.0673 | 123.786 | 0.947698 | 0.01425 | 20.698   | turquoise    | 99    |
| AY609565.1  | MRPL1   | blue | 760.3924 | 148.26  | 0.993668 | 0.0006  | 7.6      | lightcyan    | --    |
| AY609735.1  | GPR177  | blue | 905.5015 | 128.644 | 0.957572 | 0.01042 | 4.898    | yellow       | 0     |
| AY609803.1  | ECSIT   | blue | 899.7688 | 146.721 | 0.989194 | 0.00135 | 53.04    | turquoise    | 0     |
| AY609860.1  | SGCE    | blue | 882.4418 | 103.183 | 0.906495 | 0.03384 | 14.472   | turquoise    | 99    |
| AY609887.1  | PFDN1   | blue | 625.3873 | 79.0397 | 0.853466 | 0.06584 | 59.952   |              | 99    |
| AY610104.1  | MED30   | blue | 824.3487 | 142.085 | 0.982702 | 0.00272 | 5.286    | sienna3      | 0     |
| AY610107.1  | CBX5    | blue | 985.8474 | 125.115 | 0.950189 | 0.01324 | 39.346   | black        | --    |
| NM_213855.1 | MYH7    | blue | 468.3696 | 91.2454 | 0.88625  | 0.04526 | 1927.712 | midnightblue | 0     |
| CF367219    |         | blue | 975.3702 | 116.249 | 0.932942 | 0.02063 | 14.214   | turquoise    | --    |
| BX665422    |         | blue | 352.8921 | 84.1913 | 0.865388 | 0.05808 | 66.802   | turquoise    | --    |
| BX666448    |         | blue | 897.3659 | 151.768 | 0.997589 | 0.00014 | 150.16   | turquoise    | --    |
| BX666848    |         | blue | 903.3227 | 142.682 | 0.983118 | 0.00263 | 26.74    | turquoise    | --    |
| BX668759    |         | blue | 423.8834 | 97.5999 | 0.89916  | 0.03785 | 1.036    | lightyellow  | --    |
| BX675832    |         | blue | 974.209  | 136.401 | 0.971001 | 0.0059  | 201.596  | blue         | --    |
| BX675898    |         | blue | 598.6325 | 111.877 | 0.928654 | 0.02263 | 11.84    | red          | 99    |
| BX676463    |         | blue | 811.2297 | 147.248 | 0.991509 | 0.00094 | 8.488    | darkmagenta  | --    |
| BP163971    |         | blue | 488.9765 | 95.5892 | 0.899954 | 0.03741 | 2.732    | blue         | --    |
| CK453021    |         | blue | 972.5377 | 140.605 | 0.978387 | 0.0038  | 16.7     | blue         | 99    |
| CK454008    |         | blue | 897.4859 | 150.817 | 0.996406 | 0.00026 | 2.03     | skyblue      | --    |
| CK458262    |         | blue | 985.2861 | 132.358 | 0.96371  | 0.00825 | 12.23    | white        | --    |
| CK458404    |         | blue | 869.2834 | 147.742 | 0.991404 | 0.00096 | 5.446    | black        | 0     |
| BX914656    |         | blue | 728.6866 | 98.5461 | 0.900672 | 0.03701 | 35.446   | turquoise    | 99    |
| BX919363    |         | blue | 871.0434 | 150.762 | 0.996975 | 0.0002  | 3.11     | yellow       | --    |
| BX920145    |         | blue | 657.2293 | 118.576 | 0.943926 | 0.0158  | 25.27    | turquoise    | --    |
| BX920222    |         | blue | 938.6872 | 148.758 | 0.992108 | 0.00084 | 22.328   | white        | --    |
| BX920452    |         | blue | 836.2043 | 121.606 | 0.94492  | 0.01539 | 36.224   | blue         | --    |
| BX924006    |         | blue | 986.2734 | 140     | 0.976973 | 0.00418 | 10.672   | navy         | --    |
| BX924401    |         | blue | 706.6468 | 141.572 | 0.984932 | 0.00222 | 7.936    |              | --    |
| BX925530    |         | blue | 651.6807 | 136.773 | 0.977218 | 0.00411 | 2.252    | violet       | --    |
| BX926950    |         | blue | 799.4294 | 149.502 | 0.994897 | 0.00044 | 30.594   | turquoise    | --    |
| CN157619    |         | blue | 991.086  | 134.011 | 0.966442 | 0.00734 | 64.982   | blue         | --    |
| CN158157    |         | blue | 783.2543 | 150.187 | 0.99683  | 0.00021 | 26.676   | turquoise    | --    |
| CN159503    |         | blue | 774.8378 | 148.03  | 0.993627 | 0.00061 | 11.206   | turquoise    | --    |
| CN162261    |         | blue | 823.7533 | 149.108 | 0.994162 | 0.00053 | 4.58     | turquoise    | --    |
| CJ020677    |         | blue | 927.5247 | 148.493 | 0.991734 | 0.0009  | 7.208    | lightyellow  | 99    |
| DN103971    |         | blue | 879.2622 | 148.09  | 0.992467 | 0.00078 | 19.126   | turquoise    | --    |
| DN104509    |         | blue | 740.4868 | 143.478 | 0.986406 | 0.0019  | 10.042   | royalblue    | --    |
| DN106267    |         | blue | 745.4209 | 143.736 | 0.986106 | 0.00196 | 3.688    | white        | --    |
| DN106307    |         | blue | 882.0214 | 140.741 | 0.980335 | 0.0033  | 35.044   | black        | --    |
| DN113940    |         | blue | 749.9724 | 148.745 | 0.994845 | 0.00044 | 5.734    | black        | --    |

|          |      |          |         |          |         |          |               |    |    |
|----------|------|----------|---------|----------|---------|----------|---------------|----|----|
| DN115314 | blue | 979.8983 | 139.845 | 0.976669 | 0.00426 | 30.196   | lightyellow   | -- |    |
| DN115744 | blue | 565.2152 | 114.496 | 0.93404  | 0.02013 | 13.576   | royalblue     | -- |    |
| DN115916 | blue | 859.9734 | 144.837 | 0.986306 | 0.00192 | 12.094   | orange        | -- |    |
| DN116041 | blue | 786.9382 | 126.377 | 0.954361 | 0.01162 | 21.328   | blue          | -- |    |
| DN116668 | blue | 430.1434 | 103.602 | 0.913194 | 0.0303  | 9.676    | darkmagenta   | -- |    |
| DN118663 | blue | 991.1468 | 136.271 | 0.970547 | 0.00604 | 3.284    | grey60        | -- |    |
| DN121492 | blue | 845.1703 | 131.47  | 0.964413 | 0.00802 | 7.656    | violet        | -- |    |
| DN122709 | blue | 384.5387 | 74.7872 | 0.841202 | 0.07413 | 16.25    | turquoise     | -- |    |
| DN123551 | blue | 593.7688 | 94.2905 | 0.889032 | 0.04363 | 122.164  | navy          | -- | 99 |
| DN124718 | blue | 925.3166 | 149.368 | 0.993523 | 0.00063 | 2.884    | lightyellow   | -- | 0  |
| DN125619 | blue | 567.5285 | 118.817 | 0.944528 | 0.01555 | 13.188   | turquoise     | -- |    |
| DN132866 | blue | 549.7049 | 105.553 | 0.916908 | 0.02839 | 4063.742 | royalblue     | -- |    |
| BW974788 | blue | 587.2749 | 85.9038 | 0.870695 | 0.05472 | 30.95    | orange        | -- | 0  |
| AJ947557 | blue | 493.836  | 106.855 | 0.922764 | 0.02547 | 6.634    | navy          | -- |    |
| AJ956504 | blue | 957.9383 | 138.206 | 0.974742 | 0.0048  | 22.134   | turquoise     | -- |    |
| DV227358 | blue | 849.8925 | 135.956 | 0.972849 | 0.00535 | 2.154    | lightyellow   | -- |    |
| DV900662 | blue | 803.2575 | 150.527 | 0.996662 | 0.00023 | 248.594  | turquoise     | -- |    |
| CV875565 | blue | 774.2519 | 150.289 | 0.996736 | 0.00022 | 1.054    | lightgreen    | -- |    |
| CX064206 | blue | 710.0368 | 124.756 | 0.954724 | 0.01149 | 77.784   | brown         | -- |    |
| EB684343 | blue | 635.3383 | 103.688 | 0.912035 | 0.0309  | 116.238  | navy          | -- |    |
| DB789786 | blue | 965.4397 | 144.499 | 0.984873 | 0.00223 | 3.258    | yellow        | -- |    |
| DB795256 | blue | 941.396  | 148.466 | 0.991591 | 0.00092 | 5.584    | yellow        | -- |    |
| DT323640 | blue | 838.2138 | 142.015 | 0.982702 | 0.00272 | 5.902    | grey60        | -- |    |
| DT324398 | blue | 977.8395 | 140.145 | 0.977462 | 0.00405 | 11.66    | darkturquoise | -- |    |
| EW041986 | blue | 973.3932 | 137.076 | 0.972521 | 0.00545 | 78.76    | orange        | -- |    |
| EW113181 | blue | 635.037  | 132.631 | 0.968747 | 0.0066  | 3.27     |               | -- |    |
| EW138865 | blue | 639.4295 | 135.562 | 0.973629 | 0.00512 | 4.182    | lightyellow   | -- |    |
| EW150678 | blue | 926.663  | 148.649 | 0.992051 | 0.00085 | 3.336    | lightgreen    | -- |    |
| EW190518 | blue | 775.8715 | 135.896 | 0.973305 | 0.00521 | 6.278    | lightyellow   | -- |    |
| EW244600 | blue | 577.8565 | 112.72  | 0.934902 | 0.01974 | 25.89    | brown         | -- |    |
| EW258248 | blue | 941.8889 | 148.082 | 0.990939 | 0.00103 | 2.482    | violet        | -- |    |
| EW266525 | blue | 910.9474 | 144.368 | 0.985539 | 0.00208 | 13.024   | black         | -- | 99 |
| EW299636 | blue | 681.148  | 90.2772 | 0.878093 | 0.05015 | 7.53     | lightcyan     | -- |    |
| EW501346 | blue | 640.4399 | 137.836 | 0.978201 | 0.00385 | 14.458   |               | -- |    |
| EW537674 | blue | 553.257  | 86.8004 | 0.872234 | 0.05376 | 8.246    | darkgreen     | -- |    |
| EW569616 | blue | 662.0212 | 121.619 | 0.948775 | 0.01381 | 6.838    | darkmagenta   | -- |    |
| EW577030 | blue | 465.1693 | 108.593 | 0.923819 | 0.02495 | 29.92    | salmon        | -- |    |
| EW589560 | blue | 867.9835 | 131.323 | 0.964364 | 0.00803 | 22.042   | white         | -- |    |
| EW670598 | blue | 853.5275 | 143.401 | 0.984021 | 0.00242 | 9.212    | darkgrey      | -- |    |
| AW414891 | blue | 954.8295 | 144.24  | 0.984578 | 0.00229 | 11.744   | red           | -- |    |
| BQ601250 | blue | 592.3566 | 128.184 | 0.961356 | 0.00907 | 5.538    | navy          | -- |    |

Table S10-3. Module eigengene and its evolutionary rates in 15 postnatal highly LDE-specific modules (LDE\_darkgrey).

| pig_Genebank   | pig_Gene | LDE Module | kTotal | kWithin | eigencorr | eigenpval | meanExpr | LTModule      | Ka/Ks  |
|----------------|----------|------------|--------|---------|-----------|-----------|----------|---------------|--------|
| AK230667.1     | RIOK2    | darkgrey   | 863.31 | 50.9695 | 0.98544   | 0.002105  | 19.572   | turquoise     | 0.1625 |
| AK234301.1     | RPUSD1   | darkgrey   | 950.32 | 51.9505 | 0.98875   | 0.001429  | 9.692    | tan           | 0      |
| AK240542.1     | CBX1     | darkgrey   | 686.17 | 39.1613 | 0.93242   | 0.020874  | 25.588   | blue          | --     |
| AK234463.1     |          | darkgrey   | 881.37 | 48.2375 | 0.97413   | 0.004975  | 2.424    | yellow        | --     |
| AK234534.1     | CSRP1    | darkgrey   | 826.44 | 51.2423 | 0.9866    | 0.001859  | 25.928   | black         | 0      |
| AK238822.1     | SLC16A1  | darkgrey   | 918.82 | 50.8563 | 0.98487   | 0.002229  | 48.594   | turquoise     | 0.4149 |
| AK232646.1     | DHRS11   | darkgrey   | 953.26 | 52.5469 | 0.99113   | 0.001002  | 5.452    | violet        | 0.1299 |
| AK233336.1     |          | darkgrey   | 899.39 | 52.368  | 0.99129   | 0.000975  | 5.984    | darkred       | --     |
| AK236998.1     | HMG2     | darkgrey   | 767.8  | 48.2544 | 0.97397   | 0.005021  | 2.726    | tan           | --     |
| AK240275.1     | TRAK1    | darkgrey   | 861.76 | 49.4512 | 0.97941   | 0.003536  | 9.754    | yellow        | 99     |
| AK237326.1     | THOC4    | darkgrey   | 895.49 | 50.0046 | 0.98166   | 0.002974  | 11.514   | tan           | --     |
| NM_001078687.1 | SMPX     | darkgrey   | 666.9  | 38.8903 | 0.92996   | 0.022015  | 153.78   | orange        | --     |
| NM_001123135.1 | PLIN5    | darkgrey   | 959.24 | 51.3116 | 0.98566   | 0.002056  | 6.244    | black         | 99     |
| XM_001925477.1 | ITGA9    | darkgrey   | 743.65 | 46.414  | 0.96596   | 0.0075    | 11.006   | darkmagenta   | 99     |
| XM_001927860.1 | RBM8A    | darkgrey   | 921.86 | 53      | 0.99343   | 0.000638  | 69.232   | violet        | 0      |
| XM_001927969.1 | PEX11B   | darkgrey   | 790.58 | 48.4536 | 0.97491   | 0.004752  | 8.112    | tan           | 0      |
| XM_001928010.1 | ARFGEF1  | darkgrey   | 1000.7 | 50.6221 | 0.98256   | 0.002758  | 18.394   | tan           | 0.1897 |
| XM_001927459.1 | PRRX1    | darkgrey   | 932.22 | 54.3136 | 0.9985    | 6.96E-05  | 2.318    | turquoise     | --     |
| XM_001928732.1 | ETFA     | darkgrey   | 860.46 | 51.0273 | 0.98564   | 0.00206   | 154.422  | turquoise     | 0.1286 |
| XM_001927529.1 | ALDH18A1 | darkgrey   | 998.95 | 51.6342 | 0.98674   | 0.001829  | 6.774    | turquoise     | 0      |
| XM_001928156.1 | RBM19    | darkgrey   | 930.24 | 52.3751 | 0.99049   | 0.001111  | 5.016    | lightyellow   | 0.1252 |
| XM_001927481.1 | HIRA     | darkgrey   | 1015.4 | 49.9108 | 0.97926   | 0.003575  | 8.568    | pink          | 0.3506 |
| XM_001927396.1 | TRMT6    | darkgrey   | 753.73 | 47.5736 | 0.97097   | 0.005912  | 15.104   | blue          | 0      |
| NM_214407.1    | GPX4     | darkgrey   | 673.19 | 42.2101 | 0.94645   | 0.014755  | 85.436   | grey          | --     |
| AY609612.1     | GDE1     | darkgrey   | 877.36 | 52.8029 | 0.99276   | 0.000739  | 56.918   | black         | 0      |
| AY609966.1     | MRPL42   | darkgrey   | 930.68 | 50.7137 | 0.98401   | 0.00242   | 23.156   | turquoise     | 99     |
| AY610041.1     | RTN4IP1  | darkgrey   | 901.88 | 52.7734 | 0.99253   | 0.000775  | 14.584   | turquoise     | 0.3431 |
| CF177919       |          | darkgrey   | 851.26 | 49.4828 | 0.97942   | 0.003533  | 4.53     | darkgrey      | --     |
| CF180385       |          | darkgrey   | 1000.1 | 50.3463 | 0.98113   | 0.003104  | 5.122    | violet        | --     |
| CF181098       |          | darkgrey   | 992.54 | 51.852  | 0.98765   | 0.001644  | 9.042    | violet        | --     |
| BX667460       |          | darkgrey   | 825.18 | 49.9946 | 0.98132   | 0.003057  | 567.994  | turquoise     | --     |
| BP144404       |          | darkgrey   | 823.24 | 50.9983 | 0.98556   | 0.002079  | 6.348    | pink          | --     |
| BP144484       |          | darkgrey   | 945.6  | 53.9416 | 0.99684   | 0.000213  | 11.44    | red           | 0.4075 |
| BP153164       |          | darkgrey   | 614.74 | 39.1846 | 0.93028   | 0.021867  | 8.536    | yellow        | --     |
| CK453453       |          | darkgrey   | 941.04 | 52.9107 | 0.9927    | 0.000748  | 3.416    | yellow        | --     |
| CK454542       |          | darkgrey   | 932.79 | 53.7252 | 0.99607   | 0.000296  | 9.812    | darkturquoise | --     |
| CK459522       |          | darkgrey   | 645.87 | 41.2701 | 0.9411    | 0.017008  | 14.896   | purple        | --     |
| CK460835       |          | darkgrey   | 990.91 | 50.756  | 0.98335   | 0.002572  | 16.706   | tan           | --     |
| CN165093       |          | darkgrey   | 1002.2 | 50.7287 | 0.98289   | 0.00268   | 10.322   | yellow        | --     |
| DN101901       |          | darkgrey   | 1011.6 | 49.4363 | 0.97712   | 0.004141  | 22.296   | darkturquoise | --     |
| DN112398       |          | darkgrey   | 991.98 | 49.3721 | 0.97741   | 0.004063  | 3.606    | blue          | --     |
| AJ947734       |          | darkgrey   | 919.8  | 48.5647 | 0.97502   | 0.004723  | 143.694  | turquoise     | --     |
| AJ955965       |          | darkgrey   | 972.97 | 52.0502 | 0.98876   | 0.001427  | 6.38     | white         | --     |
| AJ957573       |          | darkgrey   | 1019.3 | 48.7974 | 0.97423   | 0.004948  | 9.17     | lightyellow   | --     |
| AJ959301       |          | darkgrey   | 896.3  | 50.4158 | 0.98313   | 0.002625  | 7.804    | turquoise     | --     |
| AJ959885       |          | darkgrey   | 851.82 | 49.4211 | 0.97939   | 0.003542  | 4.822    | white         | --     |
| CV871831       |          | darkgrey   | 1010.4 | 50.132  | 0.9801    | 0.003359  | 7.292    | violet        | --     |

|          |          |        |         |         |          |        |               |    |
|----------|----------|--------|---------|---------|----------|--------|---------------|----|
| DY411251 | darkgrey | 807.1  | 49.2882 | 0.97843 | 0.003792 | 3.276  | sienna3       | -- |
| DY416124 | darkgrey | 896.01 | 52.8548 | 0.99279 | 0.000733 | 3.194  | darkturquoise | -- |
| DY424643 | darkgrey | 924.54 | 51.6981 | 0.98826 | 0.001525 | 3.406  | turquoise     | -- |
| DB798053 | darkgrey | 1001.9 | 50.6862 | 0.98257 | 0.002756 | 21.4   | blue          | -- |
| DB803591 | darkgrey | 860.83 | 50.1499 | 0.98188 | 0.00292  | 4.182  | darkgreen     | -- |
| DV937193 | darkgrey | 528.02 | 33.1496 | 0.89629 | 0.039463 | 2.696  | lightgreen    | -- |
| EH412737 | darkgrey | 847.15 | 51.0016 | 0.98559 | 0.002072 | 5.746  | turquoise     | -- |
| EW247306 | darkgrey | 758.77 | 46.2795 | 0.96542 | 0.007679 | 5.616  | white         | -- |
| EW255075 | darkgrey | 1011.5 | 50.4113 | 0.98133 | 0.003053 | 7.332  | blue          | -- |
| EW256986 | darkgrey | 894.23 | 50.6456 | 0.98421 | 0.002376 | 4.524  | darkred       | -- |
| EW300204 | darkgrey | 997.17 | 50.7741 | 0.983   | 0.002655 | 6.094  | turquoise     | -- |
| EW309403 | darkgrey | 960.29 | 51.907  | 0.98838 | 0.001502 | 4.58   | turquoise     | -- |
| EW568747 | darkgrey | 774.74 | 44.0338 | 0.95606 | 0.010983 | 13.386 | turquoise     | -- |
| EW577502 | darkgrey | 955.59 | 49.0747 | 0.97674 | 0.004243 | 7.664  | turquoise     | -- |
| EH005907 | darkgrey | 841.2  | 51.5478 | 0.9878  | 0.001615 | 6.848  |               | -- |

---

Table S10-4. Module eigengene and its evolutionary rates in 15 postnatal highly LDE-specific modules (LDE\_green).

| pig_Genebank   | pig_Gene | LDE Module | kTotal | kWithin | eigencorr | eigenpval | meanExpr | LTModule      | Ka/Ks  |
|----------------|----------|------------|--------|---------|-----------|-----------|----------|---------------|--------|
| NM_001044616.1 | NRAP     | green      | 846.4  | 116.139 | 0.997944  | 0.000112  | 80.066   | blue          | 0.117  |
| AK230758.1     | ATP6AP2  | green      | 927.68 | 96.9054 | 0.955618  | 0.011149  | 22.462   | white         | 0      |
| AK234190.1     | TGIF1    | green      | 891.05 | 114.938 | 0.995896  | 0.000315  | 14.654   | tan           | 99     |
| AK237714.1     | RUFY1    | green      | 949.46 | 110.111 | 0.983348  | 0.002573  | 16.85    | salmon        | 0.1455 |
| AK234734.1     | PDCD6IP  | green      | 675.92 | 98.5002 | 0.963329  | 0.008383  | 60.448   | blue          | 0.2083 |
| AK231294.1     | CUL2     | green      | 500.93 | 62.3297 | 0.865456  | 0.058032  | 27.126   | brown         | 0      |
| AK231701.1     | SNORA60  | green      | 964.36 | 106.415 | 0.975153  | 0.004684  | 5.422    | tan           | --     |
| AK235390.1     | UBE2J2   | green      | 852.75 | 116.689 | 0.999198  | 2.73E-05  | 5.768    | blue          | --     |
| AK235521.1     | AUP1     | green      | 766.58 | 113.535 | 0.994131  | 0.000539  | 8.798    | blue          | 99     |
| AK235736.1     | NUP37    | green      | 653.22 | 103.367 | 0.973578  | 0.005135  | 14.25    | navy          | 99     |
| AK238622.1     | PA2G4    | green      | 953.07 | 105.227 | 0.972032  | 0.005591  | 31.668   | violet        | 99     |
| AK238659.1     | TMEM123  | green      | 569.23 | 92.4733 | 0.94907   | 0.013692  | 7.134    | yellow        | --     |
| AK232425.1     | GRWD1    | green      | 847.51 | 113.763 | 0.994216  | 0.000528  | 5.004    | blue          | 0      |
| AK235881.1     | PIRC34   | green      | 974.66 | 101.403 | 0.963526  | 0.008316  | 20.878   | blue          | 99     |
| AK236069.1     | RRN3     | green      | 477.73 | 62.6502 | 0.866171  | 0.057576  | 10.458   | tan           | --     |
| AK239116.1     | DARS     | green      | 954.96 | 100.277 | 0.963179  | 0.008435  | 142.774  | turquoise     | 0.1844 |
| AK236287.1     | NOL10    | green      | 945.41 | 112.558 | 0.990478  | 0.001114  | 4.846    | blue          | 0      |
| AK230590.1     | SAT1     | green      | 801.04 | 114.642 | 0.996446  | 0.000254  | 19.204   | navy          | 99     |
| AK236374.1     | NUP93    | green      | 872.37 | 115.524 | 0.996284  | 0.000272  | 2.934    | blue          | --     |
| AK236554.1     | CDC37L1  | green      | 656.99 | 88.135  | 0.93858   | 0.018103  | 14.94    | turquoise     | 99     |
| AK232780.1     | USP2     | green      | 971.33 | 104.059 | 0.970984  | 0.005907  | 32.604   | turquoise     | 0      |
| AK239617.1     | CCNDBP1  | green      | 778.76 | 105.493 | 0.976019  | 0.004442  | 11.966   | navy          | --     |
| AK239726.1     | UBE2D3   | green      | 827.65 | 109.358 | 0.98347   | 0.002545  | 22.718   | brown         | --     |
| AK236572.1     | UQCC     | green      | 772.32 | 113.307 | 0.993935  | 0.000566  | 13.926   | turquoise     | --     |
| AK236700.1     | FKBP9    | green      | 905.44 | 113.878 | 0.991835  | 0.000885  | 41.898   | green         | 0      |
| AK236976.1     | PPP1R3B  | green      | 712.36 | 107.127 | 0.981432  | 0.003029  | 46.522   | navy          | 0.0869 |
| AK237106.1     | SLC25A12 | green      | 772.71 | 78.8328 | 0.911431  | 0.031218  | 24.91    | red           | 99     |
| AK240240.1     | SAPS3    | green      | 699.68 | 96.5976 | 0.957782  | 0.010347  | 29.136   | turquoise     | --     |
| AK237308.1     | ATP6AP1  | green      | 923.03 | 108.523 | 0.979848  | 0.003424  | 18.198   | orange        | --     |
| NM_214068.2    | FUT1     | green      | 937.51 | 113.421 | 0.992306  | 0.000809  | 9.876    | turquoise     | 99     |
| NM_001097506.1 | ZFAND5   | green      | 774.97 | 108.254 | 0.982629  | 0.002741  | 23.364   | white         | --     |
| NM_001097485.1 | HSBP1    | green      | 964.25 | 109.558 | 0.98306   | 0.00264   | 26.374   | turquoise     | --     |
| NM_001097460.1 | SEPX1    | green      | 406.11 | 67.6992 | 0.877875  | 0.050283  | 24.042   | royalblue     | --     |
| NM_001097475.1 | NDUFV2   | green      | 815    | 112.104 | 0.990459  | 0.001117  | 105.43   | royalblue     | 99     |
| NM_214343.2    | QDPR     | green      | 970.94 | 101.947 | 0.965735  | 0.007575  | 19.014   | black         | 0      |
| XM_001927669.1 | KIAA0020 | green      | 864.52 | 108.429 | 0.981207  | 0.003084  | 22.924   | navy          | 99     |
| XM_001925555.1 | SGPP1    | green      | 832.6  | 112.258 | 0.990258  | 0.001152  | 7.5      | paleturquoise | --     |
| XM_001925373.1 | KIAA1468 | green      | 816.39 | 87.5044 | 0.934163  | 0.020077  | 19.994   | green         | 0.4208 |
| XM_001928960.1 | PEA15    | green      | 904.67 | 104.11  | 0.970027  | 0.006201  | 36.472   | blue          | 99     |
| XM_001928649.1 | RAP1A    | green      | 863.15 | 106.306 | 0.975792  | 0.004505  | 67.268   | turquoise     | 0      |
| XM_001927243.1 | LYPLA1   | green      | 943.36 | 105.251 | 0.97201   | 0.005598  | 38.256   | turquoise     | --     |
| XM_001925783.1 | DCAF13   | green      | 868.57 | 116.128 | 0.99745   | 0.000155  | 8.698    | turquoise     | 0.173  |
| XM_001927549.1 | COPZ1    | green      | 704.96 | 97.5625 | 0.961161  | 0.009135  | 15.442   | blue          | --     |
| XM_001925059.1 | RAB21    | green      | 889.3  | 110.02  | 0.983485  | 0.002541  | 10.48    | yellow        | 99     |
| XM_001925531.1 | CDC42BPB | green      | 871.7  | 111.702 | 0.988477  | 0.001482  | 14.398   | blue          | 0.0615 |

|                         |       |        |         |          |          |         |               |        |
|-------------------------|-------|--------|---------|----------|----------|---------|---------------|--------|
| XM_001927473.1          | green | 807.49 | 109.869 | 0.986082 | 0.001967 | 75.722  | turquoise     | 0      |
| XM_001926122.1 ACYP1    | green | 775.32 | 111.059 | 0.989156 | 0.001353 | 10.864  | blue          | --     |
| XM_001928271.1 FAM158A  | green | 567.12 | 87.0596 | 0.936102 | 0.019202 | 47.53   | purple        | 0.3437 |
| XM_001929390.1 HDDC3    | green | 872.99 | 111.48  | 0.987515 | 0.001672 | 15.144  | turquoise     | 99     |
| XM_001929425.1 ZXDC     | green | 644.19 | 75.2283 | 0.905854 | 0.034183 | 12.44   | tan           | 0.2171 |
| XM_001927097.1 SPRY2    | green | 731.88 | 107.134 | 0.982314 | 0.002816 | 24.58   | green         | 99     |
| XM_001927213.1 ANKRD28  | green | 527.38 | 82.7704 | 0.924501 | 0.024619 | 15.226  |               | 0      |
| XM_001924716.1 CLDND1   | green | 663.67 | 104.544 | 0.976175 | 0.004399 | 14.552  | blue          | 99     |
| XM_001926917.1 PLXND1   | green | 564.16 | 68.5364 | 0.886434 | 0.045151 | 21.758  | brown         | 0.0304 |
| XM_001926579.1 SMC3     | green | 782.64 | 114.014 | 0.994895 | 0.000437 | 26.504  | white         | 0      |
| XM_001929000.1 BAG3     | green | 678.84 | 104.704 | 0.976675 | 0.004261 | 56.38   | turquoise     | 0.1523 |
| XM_001927415.1 BMPR1A   | green | 814.28 | 113.616 | 0.994208 | 0.000529 | 14.278  | darkturquoise | 0      |
| XM_001927868.1 ZNF22    | green | 530.89 | 87.6781 | 0.936526 | 0.019013 | 4.08    | blue          | 99     |
| XM_001929282.1 CCDC6    | green | 555.88 | 65.0829 | 0.87411  | 0.052595 | 6.946   | violet        | 99     |
| XM_001925326.1 TRIAP1   | green | 777.98 | 113.006 | 0.993492 | 0.00063  | 4.972   | blue          | --     |
| XM_001928487.1 COX6A1P2 | green | 951.6  | 103.568 | 0.968056 | 0.006821 | 16.196  | turquoise     | --     |
| XM_001924322.1 CHRNA1   | green | 446.67 | 66.9223 | 0.879112 | 0.049531 | 1.484   | navy          | 0      |
| EF113595.2 SEPNI        | green | 962.34 | 103.139 | 0.967417 | 0.007026 | 28.898  | royalblue     | 99     |
| AY368623.1 COL5A2       | green | 969.32 | 107.11  | 0.977184 | 0.004123 | 24.29   | turquoise     | --     |
| NM_213944.1 DAD1        | green | 834.61 | 115.494 | 0.996785 | 0.000219 | 20.498  | blue          | 0      |
| NM_214024.1 PPP2R1A     | green | 913.31 | 112.104 | 0.987826 | 0.001609 | 29.146  | tan           | 0      |
| NM_214188.1 DDOST       | green | 521.7  | 71.3719 | 0.896148 | 0.039543 | 10.1    | orange        | 0      |
| NM_214245.1 SCAMP1      | green | 686.57 | 94.7526 | 0.954706 | 0.011493 | 12.126  | darkred       | 0      |
| NM_214361.1 MCL1        | green | 790.91 | 111.914 | 0.990558 | 0.0011   | 105.712 | lightyellow   | 99     |
| NM_214396.1 XIRP2       | green | 253.51 | 40.9239 | 0.775529 | 0.123277 | 701.55  | pink          | 99     |
| NM_001004045.1 S100A11  | green | 893.78 | 115.898 | 0.997742 | 0.000129 | 5.894   | skyblue       | 0      |
| AY609728.1 MRPL30       | green | 795    | 87.2771 | 0.931363 | 0.021362 | 36.134  | royalblue     | 0      |
| AY610012.1 C1GALT1C1    | green | 862.06 | 117.025 | 0.999887 | 1.45E-06 | 9.526   | darkgrey      | 99     |
| AY610221.1 LRRC39       | green | 790.48 | 114.126 | 0.994883 | 0.000439 | 12.622  |               | 0      |
| AY610353.1 MRPL11       | green | 955.74 | 111.512 | 0.987858 | 0.001603 | 7.652   | blue          | 0.6639 |
| NM_001032358.1 PIGK     | green | 860.89 | 116.351 | 0.99809  | 0.0001   | 8.862   | turquoise     | --     |
| NM_001038007.1 SFRS1    | green | 990.31 | 98.7942 | 0.958337 | 0.010144 | 63.646  | grey60        | 99     |
| BX665072                | green | 924.85 | 109.632 | 0.982118 | 0.002863 | 6.056   | turquoise     | --     |
| BX665424                | green | 932.74 | 109.526 | 0.981799 | 0.00294  | 135.022 | grey          | 0      |
| BX670342                | green | 972.94 | 104.278 | 0.970238 | 0.006136 | 25.942  | black         | --     |
| BX670411                | green | 763.19 | 112.377 | 0.992288 | 0.000812 | 10.278  | yellow        | --     |
| BX672685                | green | 701.33 | 91.8697 | 0.948258 | 0.014019 | 11.064  | pink          | --     |
| BP163106                | green | 960.61 | 109.758 | 0.983154 | 0.002618 | 8.034   | black         | --     |
| CK451396                | green | 845.46 | 112.882 | 0.99278  | 0.000736 | 15.354  | blue          | 99     |
| CK456387                | green | 974.67 | 107.031 | 0.977047 | 0.00416  | 18.52   | turquoise     | --     |
| CK463972                | green | 915.59 | 114.669 | 0.993746 | 0.000593 | 11.232  | darkgreen     | --     |
| CK466682                | green | 821.74 | 116.202 | 0.998668 | 5.83E-05 | 0.934   | lightyellow   | --     |
| CK467336                | green | 976.31 | 106.543 | 0.976068 | 0.004428 | 15.392  | blue          | --     |
| BX914732                | green | 804.73 | 112.881 | 0.992009 | 0.000857 | 13.14   | paleturquoise | --     |
| BX915153                | green | 815.18 | 111.225 | 0.989305 | 0.001326 | 4.57    | turquoise     | 99     |
| BX921788                | green | 863.66 | 112.649 | 0.991712 | 0.000905 | 20.644  | black         | --     |
| BX922232                | green | 942.86 | 107.373 | 0.976899 | 0.0042   | 34.422  | paleturquoise | --     |
| BX922274                | green | 750.83 | 110.75  | 0.988688 | 0.001442 | 6.888   | salmon        | 0      |
| BX923017                | green | 967.37 | 106.959 | 0.978219 | 0.003846 | 10.212  | darkmagenta   | 99     |
| BX923116                | green | 814.95 | 114.232 | 0.994501 | 0.000489 | 6.364   | brown         | --     |
| BX925602                | green | 593.65 | 96.2463 | 0.957573 | 0.010423 | 24.568  | navy          | --     |

|          |         |       |        |         |          |          |                     |    |    |
|----------|---------|-------|--------|---------|----------|----------|---------------------|----|----|
| BX926249 |         | green | 796.39 | 108.713 | 0.984007 | 0.002422 | 7.946 darkred       | -- |    |
| CN155716 |         | green | 486.41 | 80.0037 | 0.915554 | 0.029082 | 53.214 white        | -- |    |
| CN157199 |         | green | 447.57 | 74.6244 | 0.900208 | 0.037271 | 13.406 turquoise    | -- |    |
| CN158088 |         | green | 704.65 | 88.0638 | 0.935054 | 0.019674 | 11.024 greenyellow  | -- |    |
| AJ604633 |         | green | 701.12 | 77.8161 | 0.905674 | 0.03428  | 3.922 blue          | -- |    |
| CJ014614 |         | green | 706.88 | 106.205 | 0.979802 | 0.003435 | 9.55 salmon         | -- |    |
| CJ022676 |         | green | 582.7  | 94.3647 | 0.953374 | 0.012001 | 5.244 paleturquoise | -- |    |
| DN102066 |         | green | 770.82 | 109.647 | 0.98635  | 0.001911 | 20.15 blue          | -- |    |
| DN105634 |         | green | 813.71 | 109.843 | 0.98496  | 0.002209 | 17.318 turquoise    | -- |    |
| DN107792 |         | green | 976.55 | 106.181 | 0.975062 | 0.00471  | 4.112 lightgreen    | -- |    |
| DN112212 |         | green | 956.62 | 106.788 | 0.975697 | 0.004532 | 24.404 blue         | -- |    |
| DN114469 |         | green | 406.63 | 59.3365 | 0.851215 | 0.067334 | 80.644 salmon       | -- |    |
| DN116629 |         | green | 820.06 | 114.832 | 0.995641 | 0.000345 | 11.214 lightyellow  | -- |    |
| DN119751 |         | green | 901.62 | 112.613 | 0.989152 | 0.001354 | 6.558 yellow        | -- |    |
| DN132902 |         | green | 903.27 | 115.793 | 0.996767 | 0.000221 | 5.64 blue           | -- |    |
| DQ000205 |         | green | 940.37 | 111.268 | 0.986135 | 0.001956 | 16.374 blue         | -- |    |
| BW975963 |         | green | 870.16 | 115.227 | 0.996977 | 0.000199 | 17.374 purple       | -- | 0  |
| AJ954681 |         | green | 708.05 | 99.8851 | 0.966035 | 0.007476 | 33.678 tan          | -- |    |
| AJ956714 |         | green | 659.14 | 102.35  | 0.971388 | 0.005785 | 2.29 blue           | -- |    |
| AJ943714 |         | green | 963.79 | 105.472 | 0.972775 | 0.00537  | 4.116 yellow        | -- |    |
| AJ946210 |         | green | 462.74 | 77.169  | 0.907553 | 0.03327  | 4.102 blue          | -- | 0  |
| DV225307 |         | green | 927.76 | 109.607 | 0.982039 | 0.002882 | 19.498 blue         | -- |    |
| CV875023 |         | green | 555.54 | 90.9986 | 0.94468  | 0.015489 | 15.186 lightcyan    | -- |    |
| CV878301 |         | green | 420.55 | 61.3701 | 0.859458 | 0.061897 | 34.642 turquoise    | -- |    |
| CX064239 |         | green | 891.04 | 111.291 | 0.986463 | 0.001887 | 9.85 blue           | -- |    |
| DY408154 |         | green | 881.58 | 109.375 | 0.982244 | 0.002833 | 6.004 turquoise     | -- |    |
| DY417691 |         | green | 975.59 | 101.441 | 0.963798 | 0.008224 | 38.302 black        | -- |    |
| DB788903 |         | green | 837.56 | 115.764 | 0.998264 | 8.68E-05 | 12.534 lightgreen   | -- |    |
| DB789650 |         | green | 906.66 | 112.339 | 0.988409 | 0.001495 | 13.234 blue         | -- | 0  |
| DB787461 |         | green | 905.02 | 110.176 | 0.983599 | 0.002515 | 28.712 navy         | -- | 99 |
| AK234908 | ARL6IP5 | green | 383.92 | 49.8428 | 0.816161 | 0.091968 | 48.102 blue         | -- | 0  |
| DT322463 |         | green | 459.49 | 76.6606 | 0.906151 | 0.034023 | 3.592 green         | -- |    |
| EV978603 |         | green | 545.3  | 88.5285 | 0.938467 | 0.018153 | 22.844 turquoise    | -- |    |
| EW052504 |         | green | 775.74 | 112.898 | 0.992774 | 0.000737 | 7.086 darkgrey      | -- |    |
| EW065653 |         | green | 685.78 | 105.346 | 0.978186 | 0.003855 | 8.334 midnightblue  | -- |    |
| EW086743 |         | green | 657.06 | 90.8389 | 0.946119 | 0.014892 | 12.444 green        | -- |    |
| EW236736 |         | green | 928.65 | 105.804 | 0.973324 | 0.005209 | 134.056 navy        | -- |    |
| EW363322 |         | green | 897.49 | 109.527 | 0.982199 | 0.002843 | 7.432 turquoise     | -- |    |
| EW475154 |         | green | 641.45 | 102.106 | 0.970922 | 0.005926 | 4.542 greenyellow   | -- | 0  |
| EW533925 |         | green | 916.81 | 115.018 | 0.995601 | 0.00035  | 2.548 darkred       | -- |    |
| EW590932 |         | green | 468.47 | 76.4165 | 0.905018 | 0.034635 | 21.488 blue         | -- |    |
| EW630945 |         | green | 722.02 | 106.145 | 0.980303 | 0.003309 | 8.828 salmon        | -- |    |
| BE232243 |         | green | 557.35 | 80.8729 | 0.920825 | 0.026423 | 7.234 white         | -- |    |

Table S10-5. Module eigengene and its evolutionary rates in 15 postnatal highly LDE-specific modules (LDE\_grey60).

| pig_Genebank   | pig_Gene | LDE Module | kTotal | kWithin | eigencorr | eigenpval   | meanExpr | LTModule  | Ka/Ks |
|----------------|----------|------------|--------|---------|-----------|-------------|----------|-----------|-------|
| AK230683.1     |          | grey60     | 296.4  | 64.178  | 0.98292   | 0.002671688 | 19.478   | brown     | --    |
| AK234277.1     | PDLIM7   | grey60     | 303.16 | 67.69   | 0.99486   | 0.000442153 | 1790.29  | brown     | --    |
| AK240479.1     | UBAC1    | grey60     | 296.12 | 62.877  | 0.97847   | 0.003779683 | 383.234  | orange    | --    |
| AK231289.1     | C16orf62 | grey60     | 314.19 | 68.764  | 0.99782   | 0.00012236  | 6.634    | turquoise | 0.4   |
| AK235136.1     | DECR2    | grey60     | 314.8  | 69.237  | 0.99951   | 1.30E-05    | 30.196   | brown     | --    |
| AK238421.1     | ANAPC13  | grey60     | 282.38 | 60.553  | 0.9705    | 0.006055144 | 27.794   | brown     | --    |
| AK238713.1     | NFATC3   | grey60     | 277.53 | 57.344  | 0.95921   | 0.009827438 | 62.19    | green     | --    |
| AK235782.1     | RABAC1   | grey60     | 307.77 | 66.772  | 0.99161   | 0.000921642 | 93.34    | red       | --    |
| AK232764.1     | MAPK8IP1 | grey60     | 284.32 | 54.258  | 0.94796   | 0.014139201 | 76.344   | turquoise | --    |
| AK236600.1     | RTF1     | grey60     | 300.72 | 65.707  | 0.98793   | 0.001587978 | 11.96    | turquoise | 99    |
| AK239934.1     | VAMP8    | grey60     | 302.31 | 66.971  | 0.99226   | 0.000816062 | 30.098   | grey      | 0     |
| AK240107.1     | MAP4     | grey60     | 303.45 | 65.08   | 0.98581   | 0.002025504 | 125.76   | red       | --    |
| AK233538.1     | CDC34    | grey60     | 298.91 | 66.183  | 0.99012   | 0.001177844 | 140.376  | brown     | --    |
| AK233673.1     | GPR157   | grey60     | 265.59 | 54.73   | 0.94996   | 0.013337457 | 28.8     |           | --    |
| NM_001123127.1 | HSPA6    | grey60     | 315.05 | 69.206  | 0.99924   | 2.49E-05    | 5.114    | violet    | --    |
| NM_001123136.1 | LSM2     | grey60     | 299    | 63.54   | 0.98058   | 0.003239737 | 39.052   | blue      | --    |
| XM_001928928.1 | ATP6V1G1 | grey60     | 313.36 | 68.773  | 0.99809   | 1.00E-04    | 47.064   |           | 99    |
| XM_001926863.1 | DCAF6    | grey60     | 311.9  | 69.087  | 0.99898   | 3.92E-05    | 174.856  | brown     | 0     |
| XM_001928892.1 | CRELD1   | grey60     | 308.51 | 67.552  | 0.99438   | 0.0005049   | 13.948   | turquoise | 0.331 |
| XM_001929335.1 | TAF5     | grey60     | 290.69 | 58.26   | 0.96214   | 0.008794345 | 46.704   | red       | --    |
| XM_001929055.1 | DUSP13   | grey60     | 255.92 | 52.198  | 0.93969   | 0.017616054 | 19.124   | turquoise | 0.302 |
| XM_001928504.1 | GATC     | grey60     | 315.42 | 68.361  | 0.99652   | 0.000245946 | 12.764   | red       | 99    |
| XM_001929590.1 | KLHL22   | grey60     | 303.1  | 65.53   | 0.98759   | 0.001656383 | 16.642   | red       | --    |
| NM_214204.1    | PKIA     | grey60     | 258.17 | 53.432  | 0.94354   | 0.015965395 | 385.558  | red       | --    |
| AY609560.1     | ZNF639   | grey60     | 300.86 | 65.885  | 0.98935   | 0.001317109 | 45.722   | green     | --    |
| AY609951.1     | RNF130   | grey60     | 274.2  | 60.098  | 0.96991   | 0.006236222 | 156.176  | green     | --    |
| AY609997.1     | CMBL     | grey60     | 233.94 | 49.47   | 0.92797   | 0.022952655 | 22.476   | green     | --    |
| AY610214.1     | UBE2G1   | grey60     | 285.69 | 63.415  | 0.98102   | 0.003129432 | 77.432   | green     | 0     |
| AY610223.1     | RPL35A   | grey60     | 283.57 | 56.985  | 0.95726   | 0.010538384 | 6.87     | blue      | 0     |
| AY610341.1     | SEC11C   | grey60     | 313.82 | 68.502  | 0.99732   | 0.00016676  | 9.334    | turquoise | 0     |
| CF179222       |          | grey60     | 314.9  | 68.42   | 0.99677   | 0.00022016  | 34.856   | turquoise | --    |
| BX670617       |          | grey60     | 255.26 | 53.494  | 0.94461   | 0.015518177 | 54.216   | blue      | --    |
| BX671397       |          | grey60     | 307.56 | 68.164  | 0.99635   | 0.000264539 | 124.356  | red       | --    |
| BX675592       |          | grey60     | 272.2  | 59.705  | 0.96766   | 0.006947704 | 30.83    | red       | --    |
| CK456926       |          | grey60     | 307.27 | 65.28   | 0.98672   | 0.001834184 | 6.886    | turquoise | --    |
| BX914800       |          | grey60     | 269.17 | 56.57   | 0.95572   | 0.011112072 | 78.546   | turquoise | --    |
| BX915506       |          | grey60     | 253.42 | 55.423  | 0.95307   | 0.01211904  | 23.912   | green     | 1.622 |
| BX915599       |          | grey60     | 312.28 | 68.868  | 0.99829   | 8.47E-05    | 14.914   | turquoise | --    |
| BX917456       |          | grey60     | 308.67 | 68.257  | 0.99651   | 0.000247071 | 18.76    | brown     | 99    |
| BX926121       |          | grey60     | 282.56 | 62.798  | 0.97922   | 0.003585294 | 37.094   | orange    | --    |
| CN155050       |          | grey60     | 289.39 | 60.484  | 0.97006   | 0.006190282 | 8.67     | red       | --    |
| CN155836       |          | grey60     | 286.28 | 56.976  | 0.95745   | 0.01046879  | 32.392   | black     | --    |
| CN157668       |          | grey60     | 250.79 | 50.881  | 0.93374   | 0.020270654 | 23.174   | lightcyan | 0     |
| CN159661       |          | grey60     | 306    | 67.239  | 0.99309   | 0.000689214 | 13.094   | black     | --    |
| CN166351       |          | grey60     | 237.42 | 48.871  | 0.92713   | 0.02335283  | 2.46     | darkgreen | 0.372 |



|          |        |        |        |         |             |        |               |    |
|----------|--------|--------|--------|---------|-------------|--------|---------------|----|
| AJ656748 | grey60 | 309.64 | 67.758 | 0.99462 | 0.000473013 | 113.82 | red           | -- |
| CJ012192 | grey60 | 308.44 | 67.617 | 0.99433 | 0.000512515 | 10.022 | grey          | -- |
| CJ028165 | grey60 | 298.26 | 62.356 | 0.97667 | 0.004262353 | 5.238  | turquoise     | -- |
| DN102471 | grey60 | 296.97 | 61.304 | 0.97304 | 0.005292461 | 26.014 | yellow        | -- |
| DN114154 | grey60 | 309.71 | 67.443 | 0.99393 | 0.000567694 | 8.554  | darkturquoise | -- |
| DN114201 | grey60 | 308.87 | 67.471 | 0.99368 | 0.000603127 | 3.444  | pink          | -- |
| DN115175 | grey60 | 304.63 | 65.692 | 0.98791 | 0.001593526 | 16.582 | navy          | -- |
| DN119561 | grey60 | 300.34 | 66.321 | 0.99065 | 0.00108457  | 9.758  | green         | -- |
| DN122318 | grey60 | 267.83 | 57.704 | 0.96092 | 0.009217922 | 55.208 | salmon        | -- |
| DN125939 | grey60 | 309.13 | 64.67  | 0.98482 | 0.002239071 | 60.632 | red           | 0  |
| DN127056 | grey60 | 294.2  | 65.753 | 0.98884 | 0.001412095 | 54.24  | green         | -- |
| AJ958002 | grey60 | 312.48 | 67.594 | 0.99408 | 0.000545913 | 16.74  | blue          | -- |
| DV229656 | grey60 | 315.14 | 68.031 | 0.99575 | 0.000332416 | 23.316 | red           | 99 |
| DY435285 | grey60 | 295.19 | 60.962 | 0.97188 | 0.005635694 | 40.804 | turquoise     | -- |
| DB808839 | grey60 | 312.84 | 67.38  | 0.99338 | 0.000645913 | 12.136 | blue          | -- |
| DB786703 | grey60 | 310.99 | 68.437 | 0.99696 | 0.000200747 | 20.81  | royalblue     | 99 |
| DB795640 | grey60 | 307.42 | 66.889 | 0.99195 | 0.000865474 | 84.538 | purple        | 0  |
| EW064937 | grey60 | 300.61 | 67.193 | 0.99323 | 0.000667928 | 96.436 | yellow        | 99 |
| EW176268 | grey60 | 292.68 | 62.615 | 0.97771 | 0.003980118 | 12.666 | brown         | -- |
| EW202676 | grey60 | 309.14 | 66.756 | 0.99132 | 0.000969279 | 67.304 | greenyellow   | -- |
| EW226073 | grey60 | 315.11 | 68.82  | 0.99821 | 9.11E-05    | 6.112  | purple        | -- |
| EW252113 | grey60 | 314.7  | 68.725 | 0.99784 | 0.000120708 | 13.052 | red           | -- |
| EW297931 | grey60 | 314.72 | 69.104 | 0.99892 | 4.25E-05    | 38.772 |               | -- |
| EW372898 | grey60 | 263.34 | 57.086 | 0.95798 | 0.010274964 | 18.414 | green         | -- |
| EW373211 | grey60 | 314.64 | 67.319 | 0.99332 | 0.000655229 | 9.144  | red           | -- |
| EW414777 | grey60 | 312.98 | 68.47  | 0.99699 | 0.000198382 | 4.3    | turquoise     | -- |
| EW470718 | grey60 | 220.77 | 46.454 | 0.91486 | 0.029436063 | 17.628 | darkred       | 99 |
| EW476075 | grey60 | 292.24 | 58.278 | 0.96229 | 0.00873906  | 8.486  | yellow        | -- |
| EW529809 | grey60 | 286.42 | 62.683 | 0.97841 | 0.003796602 | 11.334 | skyblue       | -- |
| EW572612 | grey60 | 314.52 | 69.151 | 0.99908 | 3.36E-05    | 5.65   | blue          | -- |
| EW589140 | grey60 | 228.85 | 47.384 | 0.92051 | 0.026579774 | 11.632 | salmon        | -- |
| BI184843 | grey60 | 285.99 | 61.386 | 0.9743  | 0.004925559 | 13.388 | darkorange    | -- |
| BM083163 | grey60 | 299.74 | 65.443 | 0.98793 | 0.001588771 | 85.844 | navy          | -- |

Table S10-6. Module eigengene and its evolutionary rates in 15 postnatal highly LDE-specific modules (LDE\_lightyellow).

| pig_Genebank   | pig_Gene | LDE Module  | kTotal  | kWithin  | eigencorr | eigenpval | meanExpr | LTModule      | Ka/Ks |
|----------------|----------|-------------|---------|----------|-----------|-----------|----------|---------------|-------|
| NM_001044553.1 | SELK     | lightyellow | 478.675 | 64.07508 | 0.998878  | 4.51E-05  | 30.714   | purple        | 99    |
| NM_001044558.1 | TMEM59   | lightyellow | 662.916 | 54.61539 | 0.960446  | 0.009387  | 8.938    | white         | 0     |
| AK240439.1     | TBCB     | lightyellow | 368.614 | 60.38818 | 0.985043  | 0.002191  | 19.886   | salmon        | 99    |
| AK234414.1     | IPO11    | lightyellow | 531.998 | 61.21603 | 0.987573  | 0.00166   | 48.17    | green         | --    |
| AK234948.1     | STRAP    | lightyellow | 574.403 | 59.96359 | 0.982464  | 0.00278   | 143.722  | darkred       | 0     |
| AK232023.1     | PDLIM5   | lightyellow | 425.554 | 63.27538 | 0.995689  | 0.00034   | 135.396  | grey          | --    |
| AK232310.1     | ALDH1A1  | lightyellow | 394.232 | 57.31386 | 0.973883  | 0.005047  | 1.22     | yellow        | 0     |
| AK232397.1     | TMBIM6   | lightyellow | 625.03  | 58.16862 | 0.975421  | 0.004609  | 11.17    | green         | --    |
| AK238821.1     | NAP1L1   | lightyellow | 414.977 | 63.16115 | 0.995306  | 0.000386  | 6.312    | salmon        | 99    |
| AK240077.1     | SUMO2    | lightyellow | 344.089 | 51.81924 | 0.954667  | 0.011508  | 86.374   | black         | 99    |
| AK240146.1     | CXCL12   | lightyellow | 430.565 | 59.34853 | 0.981847  | 0.002928  | 9.592    | grey          | --    |
| AK233765.1     | FAM3A    | lightyellow | 489.408 | 63.98949 | 0.998524  | 6.81E-05  | 46.042   | turquoise     | --    |
| NM_001078669.1 | POMGNT1  | lightyellow | 572.708 | 53.18451 | 0.959389  | 0.009764  | 15.738   | blue          | 0.044 |
| NM_001128486.1 | FRRS1    | lightyellow | 279.141 | 50.35325 | 0.943487  | 0.01599   | 6.392    | darkgreen     | 0.17  |
| X07617.1       | PRKACA   | lightyellow | 530.772 | 53.98242 | 0.963017  | 0.00849   | 9.726    | turquoise     | --    |
| XM_001929195.1 | PPP6C    | lightyellow | 589.931 | 58.63094 | 0.977124  | 0.004139  | 114.69   | navy          | 0     |
| XM_001925794.1 | VLDLR    | lightyellow | 312.449 | 55.92249 | 0.967469  | 0.007009  | 5.208    | yellowgreen   | --    |
| XM_001928396.1 | PNRC1    | lightyellow | 327.536 | 55.04495 | 0.964387  | 0.008024  | 5.426    | grey          | 99    |
| XM_001928966.1 | CASQ1    | lightyellow | 213.189 | 41.18864 | 0.89916   | 0.037853  | 351.124  | green         | 0     |
| XM_001925288.1 | SETD3    | lightyellow | 495.65  | 63.23007 | 0.99514   | 0.000406  | 23.108   | turquoise     | 0     |
| XM_001926312.1 | PTPN21   | lightyellow | 575.509 | 60.23538 | 0.983326  | 0.002578  | 1.482    | darkgreen     | 0     |
| XM_001928665.1 | NPTN     | lightyellow | 419.319 | 58.96962 | 0.981041  | 0.003125  | 76.942   | violet        | 99    |
| XM_001929228.1 | IMP3     | lightyellow | 347.812 | 58.02646 | 0.976299  | 0.004364  | 44.868   | skyblue       | 0     |
| XM_001924631.1 | N4BP2L2  | lightyellow | 666.831 | 47.43861 | 0.933099  | 0.020563  | 8.596    | blue          | 0.241 |
| XM_001928236.1 | LSG1     | lightyellow | 302.607 | 52.24061 | 0.953768  | 0.01185   | 5.104    | turquoise     | 0.727 |
| XM_001926521.1 | PPP1R3C  | lightyellow | 321.662 | 49.33518 | 0.944404  | 0.015604  | 39.796   | salmon        | 0     |
| NM_213891.1    | VCAM1    | lightyellow | 458.318 | 63.71928 | 0.997451  | 0.000154  | 14.29    | blue          | 0.093 |
| NM_213945.1    | PLAU     | lightyellow | 324.741 | 56.90799 | 0.972208  | 0.005538  | 6.286    | skyblue       | 1.804 |
| NM_213998.1    | ITGA2B   | lightyellow | 457.236 | 55.43518 | 0.968832  | 0.006574  | 7.882    | royalblue     | 0.082 |
| NM_213785.1    | F3       | lightyellow | 574.957 | 52.0774  | 0.95499   | 0.011385  | 1.184    | tan           | 0     |
| NM_001001537.1 | ITIH4    | lightyellow | 517.607 | 55.46635 | 0.968755  | 0.006599  | 4.024    | darkmagenta   | 0.17  |
| NM_001006592.1 | MYLPF    | lightyellow | 391.273 | 59.49712 | 0.98331   | 0.002582  | 8968.848 | yellow        | 0     |
| AY870324.1     | GYS1     | lightyellow | 318.209 | 56.48219 | 0.969905  | 0.006239  | 49.048   |               | --    |
| AF116346.1     | HRAS     | lightyellow | 638.835 | 53.85355 | 0.956982  | 0.010641  | 7.51     | turquoise     | --    |
| CF360662       |          | lightyellow | 340.043 | 48.53029 | 0.940257  | 0.017371  | 5.044    | pink          | --    |
| BX668887       |          | lightyellow | 514.011 | 54.46428 | 0.964955  | 0.007834  | 11.37    | salmon        | --    |
| BX672674       |          | lightyellow | 287.484 | 51.32437 | 0.947943  | 0.014146  | 2.9      | midnightblue  | --    |
| BX672750       |          | lightyellow | 393.497 | 62.5583  | 0.993367  | 0.000648  | 12.206   | paleturquoise | 0     |
| BX674122       |          | lightyellow | 551.755 | 62.49046 | 0.992267  | 0.000815  | 14.526   | turquoise     | 99    |
| BP160020       |          | lightyellow | 525.817 | 60.20509 | 0.983812  | 0.002466  | 159.506  | greenyellow   | 99    |
| BP163665       |          | lightyellow | 673.881 | 51.87572 | 0.948186  | 0.014047  | 12.344   | navy          | --    |
| CK455244       |          | lightyellow | 628.727 | 56.13107 | 0.966601  | 0.00729   | 9.382    | salmon        | --    |
| CK458900       |          | lightyellow | 465.277 | 61.94577 | 0.990701  | 0.001075  | 29.936   | greenyellow   | --    |
| CK459066       |          | lightyellow | 568.199 | 59.1021  | 0.97893   | 0.00366   | 4.966    | grey          | --    |
| CK459225       |          | lightyellow | 375.359 | 60.01222 | 0.983719  | 0.002488  | 19.9     | grey          | --    |

|          |             |         |          |          |          |         |               |       |
|----------|-------------|---------|----------|----------|----------|---------|---------------|-------|
| CK464272 | lightyellow | 517.683 | 63.17233 | 0.995514 | 0.00036  | 3.552   | lightgreen    | --    |
| BX919553 | lightyellow | 337.433 | 58.047   | 0.976718 | 0.00425  | 87.922  | royalblue     | --    |
| BX925843 | lightyellow | 634.06  | 57.4473  | 0.972491 | 0.005454 | 4.412   | green         | 99    |
| CN158183 | lightyellow | 506.825 | 63.22344 | 0.995125 | 0.000408 | 11.318  | navy          | --    |
| CN161737 | lightyellow | 344.648 | 57.80163 | 0.975956 | 0.004459 | 4.888   | yellowgreen   | --    |
| CN162200 | lightyellow | 399.903 | 59.37003 | 0.981805 | 0.002938 | 6.838   | black         | 0.492 |
| CJ008695 | lightyellow | 637.901 | 52.03379 | 0.949698 | 0.01344  | 8.884   | purple        | 0     |
| CJ023085 | lightyellow | 310.371 | 45.71259 | 0.926914 | 0.023457 | 4.122   | paleturquoise | --    |
| CJ029984 | lightyellow | 396.382 | 52.40618 | 0.956807 | 0.010706 | 26.444  | green         | --    |
| BW982564 | lightyellow | 344.763 | 54.20692 | 0.962735 | 0.008587 | 2.944   |               | 0     |
| AJ951006 | lightyellow | 449.306 | 62.90551 | 0.994467 | 0.000494 | 36.128  | salmon        | --    |
| AJ955519 | lightyellow | 428.99  | 59.42556 | 0.982312 | 0.002816 | 169.246 | darkred       | --    |
| AJ964774 | lightyellow | 440.429 | 62.24257 | 0.991954 | 0.000865 | 8.918   | turquoise     | --    |
| AJ943520 | lightyellow | 654.206 | 54.27846 | 0.95876  | 0.009991 | 1.906   | yellowgreen   | --    |
| AJ943723 | lightyellow | 294.439 | 52.61109 | 0.953586 | 0.01192  | 54.518  | greenyellow   | --    |
| AJ944031 | lightyellow | 492.988 | 61.85394 | 0.990139 | 0.001174 | 8.852   | pink          | --    |
| DV227767 | lightyellow | 733.559 | 46.17422 | 0.921762 | 0.025959 | 16.854  | turquoise     | --    |
| DY405734 | lightyellow | 562.469 | 59.00069 | 0.97859  | 0.003748 | 20.372  | blue          | 0     |
| DY426323 | lightyellow | 414.176 | 62.94484 | 0.995009 | 0.000423 | 9.028   | darkgrey      | --    |
| DB798165 | lightyellow | 624.222 | 58.28982 | 0.976052 | 0.004433 | 3.32    | purple        | --    |
| DB802598 | lightyellow | 703.375 | 49.9898  | 0.94027  | 0.017366 | 34.484  | yellowgreen   | --    |
| DT327799 | lightyellow | 390.629 | 62.48525 | 0.992899 | 0.000717 | 137.426 | yellowgreen   | --    |
| DT335508 | lightyellow | 354.105 | 55.98536 | 0.968543 | 0.006666 | 6.17    | greenyellow   | 99    |
| EW049542 | lightyellow | 242.777 | 45.62588 | 0.922172 | 0.025757 | 3.474   | grey          | --    |
| EW382931 | lightyellow | 323.456 | 57.33085 | 0.973053 | 0.005289 | 7.702   | green         | --    |
| EW532021 | lightyellow | 494.373 | 62.17967 | 0.991302 | 0.000972 | 14.21   | grey          | --    |
| EW567071 | lightyellow | 632.471 | 54.8026  | 0.961472 | 0.009026 | 6.904   | darkgrey      | --    |
| EW576117 | lightyellow | 240.986 | 38.08604 | 0.887511 | 0.044518 | 25.964  | white         | --    |
| EW621997 | lightyellow | 518.04  | 60.41475 | 0.985373 | 0.002119 | 18.13   | yellow        | --    |
| EW675014 | lightyellow | 298.501 | 48.13089 | 0.936593 | 0.018983 | 123.366 | brown         | --    |
| EH007552 | lightyellow | 622.151 | 56.92877 | 0.969987 | 0.006213 | 9.078   | navy          | 99    |

Table S10-7. Module eigengene and its evolutionary rates in 15 postnatal highly LDE-specific modules (LDE\_magenta).

| pig_Genebank   | pig_Gene | LDE Module | kTotal  | kWithin  | eigencorr | eigenpval | meanExpr | LTModule      | Ka/Ks  |
|----------------|----------|------------|---------|----------|-----------|-----------|----------|---------------|--------|
| NM_001044584.1 | CRYZ     | magenta    | 398.538 | 78.77953 | 0.9733092 | 0.00521   | 33.084   | green         | 0.0893 |
| NM_001044594.1 | MYOZ3    | magenta    | 167.364 | 60.98798 | 0.9211055 | 0.02628   | 173.672  | darkorange    | --     |
| AK230984.1     | SEC62    | magenta    | 365.162 | 83.27746 | 0.9880901 | 0.00156   | 66.902   | skyblue       | --     |
| AK234909.1     | NUB1     | magenta    | 327.395 | 79.23191 | 0.9790986 | 0.00362   | 38.876   | skyblue       | --     |
| AK235335.1     | MLX      | magenta    | 309.87  | 86.33648 | 0.9989808 | 3.91E-05  | 22.164   | greenyellow   | 0      |
| AK235497.1     | ZADH2    | magenta    | 264.977 | 73.68594 | 0.9650048 | 0.00782   | 68.216   | purple        | --     |
| AK238441.1     | MAP2K2   | magenta    | 384.318 | 76.34244 | 0.9672064 | 0.00709   | 45.356   |               | 0      |
| AK238555.1     | CCNY     | magenta    | 127.513 | 38.43605 | 0.8220382 | 0.08768   | 8.488    | blue          | 99     |
| AK232437.1     | PACSIN3  | magenta    | 357.739 | 79.11914 | 0.9767689 | 0.00424   | 25.548   | green         | 0      |
| AK238935.1     | 9-Mar    | magenta    | 268.716 | 79.80436 | 0.9823774 | 0.0028    | 5.076    | grey          | --     |
| AK232581.1     | RABEP1   | magenta    | 388.791 | 78.92312 | 0.9743697 | 0.00491   | 18.536   | paleturquoise | --     |
| AK236160.1     | CHST10   | magenta    | 419.765 | 77.22001 | 0.967384  | 0.00704   | 11.576   | paleturquoise | 0      |
| AK230600.1     | DYNLT3   | magenta    | 117.112 | 34.55505 | 0.8032351 | 0.10163   | 11.092   | darkturquoise | --     |
| AK236496.1     |          | magenta    | 281.924 | 85.74786 | 0.9980763 | 0.0001    | 8.988    | greenyellow   | --     |
| AK232843.1     | GPD1     | magenta    | 256.403 | 84.54542 | 0.9949247 | 0.00043   | 15.054   | midnightblue  | 0      |
| AK233149.1     | H2AFJ    | magenta    | 423.27  | 75.52335 | 0.9617724 | 0.00892   | 14.668   | skyblue       | --     |
| AK236681.1     | CFDP1    | magenta    | 310.643 | 81.86043 | 0.9868532 | 0.00181   | 11.708   | greenyellow   | --     |
| AK236867.1     | KLHL7    | magenta    | 226.351 | 80.78573 | 0.9840591 | 0.00241   | 6.466    | greenyellow   | 0      |
| NM_001097509.1 | ADSSL1   | magenta    | 200.856 | 76.27581 | 0.9696809 | 0.00631   | 178.64   | grey          | --     |
| NM_214374.2    | MYL1     | magenta    | 333.831 | 82.88642 | 0.9888691 | 0.00141   | 899.148  | darkgreen     | --     |
| NM_001123078.1 | ATF4     | magenta    | 264.704 | 84.56027 | 0.9949961 | 0.00042   | 279.664  | green         | 0      |
| EU650276.1     | SLC16A3  | magenta    | 444.269 | 73.37769 | 0.953907  | 0.0118    | 18.88    | brown         | 0      |
| XM_001925693.1 | VLDLR    | magenta    | 438.379 | 75.15681 | 0.9594965 | 0.00973   | 61.882   | darkorange    | 0      |
| XM_001925096.1 | LRRC28   | magenta    | 299.983 | 80.36767 | 0.9841637 | 0.00239   | 4.634    | darkgreen     | 99     |
| XM_001924314.1 | EYA4     | magenta    | 216.469 | 77.22702 | 0.973585  | 0.00513   | 2        | greenyellow   | --     |
| XM_001927929.1 | GBP4     | magenta    | 136.394 | 55.86493 | 0.8925295 | 0.0416    | 11.758   | brown         | 1.2581 |
| XM_001929090.1 | PKM2     | magenta    | 176.859 | 66.62668 | 0.9377471 | 0.01847   | 283.6    | midnightblue  | --     |
| XM_001927339.1 | FSD2     | magenta    | 374.463 | 82.20519 | 0.9844894 | 0.00231   | 19.804   | green         | 0.1717 |
| XM_001929236.1 | SNUPN    | magenta    | 341.684 | 72.8877  | 0.9596619 | 0.00967   | 36.068   | navy          | 0.1999 |
| XM_001928810.1 | KIAA1279 | magenta    | 443.706 | 71.00527 | 0.9460184 | 0.01493   | 28.378   | yellow        | 0      |
| XM_001924401.1 | GNPAT    | magenta    | 572.404 | 52.74897 | 0.8677041 | 0.0566    | 23.704   | yellow        | 0.0622 |
| XM_001928874.1 | SNTA1    | magenta    | 422.043 | 77.65691 | 0.9682882 | 0.00675   | 39.924   | midnightblue  | 0      |
| NM_213938.1    | OXCT1    | magenta    | 215.531 | 79.05223 | 0.978532  | 0.00376   | 24.836   | greenyellow   | 99     |
| NM_213961.1    | OPTN     | magenta    | 224.535 | 78.55207 | 0.9778707 | 0.00394   | 5.392    | yellow        | 0      |
| NM_214006.1    | CD9      | magenta    | 168.184 | 62.92086 | 0.9286517 | 0.02263   | 16.626   | navy          | --     |
| NM_214077.1    | PRKAG3   | magenta    | 289.54  | 79.83651 | 0.9822043 | 0.00284   | 4.57     | greenyellow   | 0.1571 |
| NM_214193.1    | CAMK2G   | magenta    | 264.802 | 72.76261 | 0.962448  | 0.00869   | 19.79    | yellowgreen   | 0      |
| AY609877.1     | ABCF2    | magenta    | 384.018 | 76.2133  | 0.967253  | 0.00708   | 35.67    | salmon        | 0      |
| AY609892.1     | TMEM98   | magenta    | 197.817 | 64.9586  | 0.9361852 | 0.01917   | 10.786   | darkorange    | 0      |
| AY610166.1     | PTPLA    | magenta    | 351.961 | 83.82072 | 0.9904281 | 0.00112   | 142.87   | lightcyan     | 0      |
| AY610168.1     | KCMF1    | magenta    | 95.2048 | 40.17559 | 0.8106254 | 0.09607   | 39.4     | navy          | 99     |
| NM_001008691.1 | CXCL10   | magenta    | 85.9469 | 34.70276 | 0.7749639 | 0.12373   | 18.066   | brown         | --     |
| NM_001009582.1 | STMN1    | magenta    | 152.858 | 63.90266 | 0.9246518 | 0.02455   | 18.254   | magenta       | 99     |
| NM_001011727.1 | AHCY     | magenta    | 482.362 | 66.71617 | 0.9285309 | 0.02269   | 50.18    | salmon        | 0      |

|          |      |         |         |          |           |          |         |               |    |        |
|----------|------|---------|---------|----------|-----------|----------|---------|---------------|----|--------|
| CF364671 |      | magenta | 339.278 | 84.39937 | 0.9925487 | 0.00077  | 43.86   | greenyellow   | -- |        |
| BX668548 |      | magenta | 400.58  | 76.77333 | 0.9672627 | 0.00708  | 109.992 | green         |    | 0      |
| BX668978 |      | magenta | 243.643 | 82.92726 | 0.9904278 | 0.00112  | 126.616 |               | -- |        |
| BX669201 |      | magenta | 409.85  | 77.87258 | 0.9697822 | 0.00628  | 399.728 | darkgreen     |    | 99     |
| BX669236 |      | magenta | 434.31  | 72.14281 | 0.9503223 | 0.01319  | 3.254   | lightcyan     | -- |        |
| BX670633 |      | magenta | 316.372 | 85.30361 | 0.9958908 | 0.00032  | 4.746   | darkred       | -- |        |
| BX673276 |      | magenta | 183.444 | 68.52747 | 0.9451848 | 0.01528  | 15.52   | green         | -- |        |
| BX674344 |      | magenta | 128.231 | 44.43934 | 0.8456977 | 0.07105  | 3.938   | darkgreen     |    | 99     |
| BP158848 |      | magenta | 479.379 | 68.69662 | 0.9360449 | 0.01923  | 5.214   | darkgreen     |    | 0      |
| CK449475 |      | magenta | 207.355 | 76.66882 | 0.9714203 | 0.00577  | 2.48    | darkred       | -- |        |
| CK454028 |      | magenta | 494.974 | 64.34867 | 0.9201694 | 0.02675  | 8.456   | lightgreen    | -- |        |
| CK454705 |      | magenta | 106.468 | 42.52302 | 0.8340223 | 0.07912  | 65.608  | brown         | -- |        |
| CK458531 |      | magenta | 422.618 | 74.63314 | 0.9594272 | 0.00975  | 11.808  | navy          | -- |        |
| CK459166 |      | magenta | 171.579 | 66.52572 | 0.937796  | 0.01845  | 22.252  | yellowgreen   | -- |        |
| CK459461 |      | magenta | 335.147 | 77.2301  | 0.9727493 | 0.00538  | 3.558   | blue          |    | 0      |
| CK463551 |      | magenta | 398.12  | 78.09632 | 0.9713285 | 0.0058   | 13.556  | midnightblue  | -- |        |
| CK466654 |      | magenta | 566.215 | 50.93102 | 0.8599095 | 0.0616   | 21.344  | purple        | -- |        |
| BX915041 |      | magenta | 128.106 | 44.32965 | 0.8499468 | 0.06818  | 101.666 | skyblue       |    | 99     |
| BX917005 |      | magenta | 413.297 | 76.0685  | 0.9641788 | 0.00809  | 6.548   | darkgreen     | -- |        |
| BX922054 |      | magenta | 190.336 | 73.34472 | 0.9599694 | 0.00956  | 507.954 | brown         | -- |        |
| BX922270 |      | magenta | 229.632 | 79.38155 | 0.9802642 | 0.00332  | 3.682   | darkgreen     |    | 0.0705 |
| BX922273 |      | magenta | 343.35  | 84.55012 | 0.9928356 | 0.00073  | 10.568  | green         |    | 99     |
| BX922590 |      | magenta | 234.293 | 82.09696 | 0.9879344 | 0.00159  | 7.384   | green         | -- |        |
| BX923105 |      | magenta | 230.524 | 81.32764 | 0.9855992 | 0.00207  | 2.95    | green         |    | 99     |
| CN155590 |      | magenta | 174.584 | 62.78963 | 0.9277259 | 0.02307  | 1.884   | yellow        | -- |        |
| CN157249 |      | magenta | 339.308 | 82.02525 | 0.986116  | 0.00196  | 6.46    | darkgreen     | -- |        |
| CN159908 |      | magenta | 349.261 | 75.9609  | 0.9689334 | 0.00654  | 21.192  |               | -- |        |
| CJ024410 |      | magenta | 404.466 | 75.44604 | 0.9633126 | 0.00839  | 10.132  | green         | -- |        |
| CJ028990 |      | magenta | 282.563 | 81.95423 | 0.9880963 | 0.00156  | 17.074  | grey          |    | 99     |
| DN103026 |      | magenta | 412.405 | 79.50428 | 0.9743809 | 0.0049   | 5.262   | green         | -- |        |
| DN103647 |      | magenta | 380.175 | 79.60717 | 0.9771871 | 0.00412  | 6.262   | salmon        | -- |        |
| DN111119 |      | magenta | 321.149 | 75.43135 | 0.96798   | 0.00684  | 5.844   | yellowgreen   | -- |        |
| DN134248 |      | magenta | 317.484 | 86.0562  | 0.9978989 | 0.00012  | 15.24   | green         |    | 0      |
| BW955252 |      | magenta | 273.4   | 83.91217 | 0.9934017 | 0.00064  | 15.848  | yellowgreen   | -- |        |
| BW984102 |      | magenta | 390.429 | 76.05714 | 0.9657993 | 0.00755  | 7.274   | turquoise     |    | 99     |
| AJ956613 |      | magenta | 174.655 | 61.03814 | 0.9205137 | 0.02658  | 1.286   | navy          | -- |        |
| AJ944959 |      | magenta | 200.295 | 65.83834 | 0.9382754 | 0.01824  | 45.068  | black         | -- |        |
| CX063371 |      | magenta | 242.49  | 66.2102  | 0.9418521 | 0.01668  | 5.22    | salmon        | -- |        |
| CX064377 |      | magenta | 288.423 | 86.07853 | 0.9988542 | 4.65E-05 | 6.77    | salmon        | -- |        |
| DY410598 |      | magenta | 137.939 | 49.90806 | 0.8799184 | 0.04904  | 20.26   | green         | -- |        |
| DY417941 |      | magenta | 168.369 | 67.37491 | 0.939643  | 0.01764  | 59.888  | green         | -- |        |
| DY424883 |      | magenta | 184.044 | 62.8977  | 0.9274855 | 0.02318  | 317.736 | midnightblue  | -- |        |
| DY428868 |      | magenta | 197.862 | 56.52223 | 0.9112902 | 0.03129  | 6.606   | paleturquoise | -- |        |
| DQ459258 | SLN  | magenta | 256.158 | 77.34185 | 0.9754933 | 0.00459  | 128.41  | midnightblue  | -- |        |
| DB788488 |      | magenta | 356.961 | 74.9749  | 0.9648551 | 0.00787  | 2.308   | midnightblue  | -- |        |
| AK235841 | OPTN | magenta | 262.02  | 81.33387 | 0.9865889 | 0.00186  | 3.772   | greenyellow   | -- |        |
| AK240390 | BIN1 | magenta | 467.353 | 67.63773 | 0.9327673 | 0.02071  | 28.814  | greenyellow   |    | 0      |
| DT328059 |      | magenta | 213.743 | 78.13643 | 0.9759917 | 0.00445  | 2.582   | yellow        |    | 0      |

|          |         |         |          |           |         |        |              |        |
|----------|---------|---------|----------|-----------|---------|--------|--------------|--------|
| DT329597 | magenta | 228.311 | 77.40066 | 0.9746646 | 0.00482 | 21.122 | greenyellow  | 0      |
| DT330909 | magenta | 227.613 | 81.19224 | 0.985094  | 0.00218 | 12.136 | greenyellow  | 0      |
| EW055180 | magenta | 467.699 | 66.44649 | 0.9297934 | 0.02209 | 15.272 | --           |        |
| EW305206 | magenta | 427.017 | 74.17809 | 0.9574965 | 0.01045 | 34.934 | greenyellow  | --     |
| EW307515 | magenta | 157.972 | 63.3543  | 0.9239307 | 0.0249  | 7.214  | darkgreen    | 99     |
| EW309452 | magenta | 513.973 | 63.04315 | 0.9129236 | 0.03044 | 5.706  | greenyellow  | 0.4165 |
| EW310662 | magenta | 247.675 | 82.98405 | 0.9908034 | 0.00106 | 4.976  | pink         | --     |
| EW333368 | magenta | 207.696 | 76.46818 | 0.9707127 | 0.00599 | 4.288  | midnightblue | --     |
| EW333986 | magenta | 289.362 | 71.5651  | 0.9577543 | 0.01036 | 9.486  | greenyellow  | --     |
| EW589027 | magenta | 181.52  | 72.10074 | 0.9552086 | 0.0113  | 24.706 | pink         | --     |
| EW622473 | magenta | 199.032 | 76.02412 | 0.9688956 | 0.00655 | 30.312 | greenyellow  | --     |
| EW630322 | magenta | 437.705 | 76.40801 | 0.9633109 | 0.00839 | 8.662  | midnightblue | --     |
| EW645578 | magenta | 100.27  | 42.00027 | 0.8198795 | 0.08924 | 23.23  | pink         | --     |
| BI337552 | magenta | 352.302 | 66.72673 | 0.9394587 | 0.01772 | 36.04  | pink         | --     |
| BI360377 | magenta | 365.493 | 81.37314 | 0.982584  | 0.00275 | 12.478 | grey         | --     |
| BI184391 | magenta | 466.459 | 70.09684 | 0.9415526 | 0.01681 | 3.834  | greenyellow  | 99     |
| BM190547 | magenta | 459.991 | 72.89798 | 0.9508734 | 0.01297 | 52.122 | greenyellow  | --     |
| BM190416 | magenta | 515.475 | 59.51977 | 0.8995221 | 0.03765 | 12.226 | salmon       | --     |

Table S10-8. Module eigengene and its evolutionary rates in 15 postnatal highly LDE-specific modules (LDE\_midnightblue).

| pig_Genebank   | pig_Gene | LDEModule    | kTotal | kWithin | eigencorr | eigenpval | meanExpr | LTModule    | Ka/Ks |
|----------------|----------|--------------|--------|---------|-----------|-----------|----------|-------------|-------|
| NM_001044599.1 | GADD45A  | midnightblue | 965.46 | 77.103  | 0.99462   | 0.00047   | 18.506   | violet      | --    |
| NM_001048072.1 | ARF4     | midnightblue | 971.1  | 77.174  | 0.99477   | 0.00045   | 35.736   | navy        | 0     |
| AK234260.1     | DDX39    | midnightblue | 730.26 | 69.528  | 0.97339   | 0.00519   | 8.862    | blue        | 0     |
| AK231014.1     | C11orf54 | midnightblue | 892.09 | 75.348  | 0.99015   | 0.00117   | 3.58     | blue        | 0.176 |
| AK234713.1     | GTF2I    | midnightblue | 956.81 | 73.869  | 0.98543   | 0.00211   | 25.004   | turquoise   | 0     |
| AK231556.1     | HSF2     | midnightblue | 804.74 | 74.364  | 0.98744   | 0.00169   | 34.466   | black       | 99    |
| AK235325.1     | SFRS2    | midnightblue | 893.49 | 76.405  | 0.9931    | 0.00069   | 144.162  | lightyellow | 0     |
| AK238246.1     | WDR26    | midnightblue | 843.9  | 76.159  | 0.99215   | 0.00083   | 14.806   | blue        | 99    |
| AK238334.1     | SLC35D2  | midnightblue | 916.32 | 74.621  | 0.98811   | 0.00155   | 5.798    | violet      | 99    |
| AK231915.1     | STIP1    | midnightblue | 922.94 | 76.303  | 0.9926    | 0.00076   | 42.672   | blue        | 0.2   |
| AK235234.1     | RAB10    | midnightblue | 624.14 | 63.701  | 0.95477   | 0.01147   | 112.428  | turquoise   | 99    |
| AK235982.1     | CWC27    | midnightblue | 811.94 | 72.559  | 0.98254   | 0.00276   | 9.6      | lightyellow | 0.504 |
| AK236052.1     | PTX3     | midnightblue | 892.34 | 77.285  | 0.99543   | 0.00037   | 7.484    | turquoise   | 0.361 |
| AK236154.1     | TADA2A   | midnightblue | 897.17 | 77.562  | 0.99609   | 0.00029   | 12.04    | white       | 0     |
| AK236189.1     | DNAJB9   | midnightblue | 979.7  | 75.351  | 0.9896    | 0.00127   | 10.506   | lightyellow | --    |
| AK239186.1     | MCM6     | midnightblue | 867.08 | 72.304  | 0.98112   | 0.00311   | 10.344   | navy        | --    |
| AK230591.1     | AZIN1    | midnightblue | 626.85 | 65.194  | 0.95967   | 0.00966   | 45.446   | blue        | 99    |
| AK230605.1     | CCNC     | midnightblue | 901.19 | 70.85   | 0.97681   | 0.00422   | 13.254   | grey60      | 0     |
| AK239563.1     | CCT5     | midnightblue | 950.73 | 74.536  | 0.98766   | 0.00164   | 70.788   | grey60      | --    |
| AK236584.1     | MRPS27   | midnightblue | 880.08 | 64.868  | 0.95817   | 0.0102    | 19.168   | turquoise   | 0     |
| AK236655.1     | ATP6V1B2 | midnightblue | 938.94 | 78.656  | 0.99892   | 4.26E-05  | 27.908   | turquoise   | --    |
| AK236674.1     | WBSCR22  | midnightblue | 923.88 | 77.422  | 0.99556   | 0.00035   | 25.398   | blue        | 0     |
| AK239906.1     | HSPB1    | midnightblue | 694.69 | 64.92   | 0.95917   | 0.00984   | 117.038  | blue        | --    |
| AK236899.1     | SH3KBP1  | midnightblue | 805.44 | 74.779  | 0.98839   | 0.0015    | 8.348    | turquoise   | 0.381 |
| AK240079.1     | PDGFRB   | midnightblue | 909.62 | 69.721  | 0.97342   | 0.00518   | 7.382    | black       | --    |
| AK233373.1     | TSPAN12  | midnightblue | 903.3  | 77.628  | 0.99628   | 0.00027   | 9.318    | blue        | 0     |
| NM_001113442.1 | UNC45B   | midnightblue | 1000   | 70.778  | 0.97624   | 0.00438   | 20.97    | turquoise   | 0.015 |
| X15073.1       | ATP2A2   | midnightblue | 903.46 | 76.966  | 0.99455   | 0.00048   | 13.336   |             | 99    |
| XM_001925674.1 | ATP5A1   | midnightblue | 997.68 | 71.917  | 0.97972   | 0.00346   | 1093.45  | turquoise   | 0     |
| XM_001927095.1 | NT5E     | midnightblue | 947.62 | 67.75   | 0.96715   | 0.00711   | 6.846    | turquoise   | 0.104 |
| XM_001928505.1 | WDYHV1   | midnightblue | 704.25 | 70.621  | 0.97648   | 0.00431   | 10.196   | black       | 0.077 |
| XM_001926398.1 | SMG5     | midnightblue | 944.48 | 71.164  | 0.97772   | 0.00398   | 5.498    | yellow      | 0     |
| XM_001928851.1 | DAP3     | midnightblue | 764.87 | 59.031  | 0.9397    | 0.01761   | 18.688   | blue        | 99    |
| XM_001926489.1 | SF3B4    | midnightblue | 989.17 | 69.037  | 0.97107   | 0.00588   | 7.184    | tan         | 99    |
| XM_001928686.1 | SEC22B   | midnightblue | 812.76 | 74.576  | 0.98812   | 0.00155   | 10.568   | salmon      | 0     |
| XM_001927665.1 | UBE2W    | midnightblue | 901.25 | 76.946  | 0.99465   | 0.00047   | 11.282   | blue        | 99    |
| XM_001927466.1 | DZIP1    | midnightblue | 948.83 | 78.085  | 0.99734   | 0.00016   | 5.952    | darkorange  | 0.178 |
| XM_001928597.1 | DNAJC19  | midnightblue | 582.99 | 56.126  | 0.92929   | 0.02233   | 45.276   | blue        | 0     |
| XM_001924202.1 | SEC31B   | midnightblue | 823.88 | 75.835  | 0.99142   | 0.00095   | 6.23     |             | --    |
| XM_001927832.1 | FAM190B  | midnightblue | 955.63 | 77.371  | 0.99534   | 0.00038   | 14.928   | turquoise   | 99    |
| XM_001927955.1 | HNRNPH3  | midnightblue | 839.04 | 76.096  | 0.992     | 0.00086   | 64.744   | blue        | 0.393 |
| XM_001924771.1 | RPP30    | midnightblue | 936.32 | 78.463  | 0.99837   | 7.88E-05  | 18.616   | turquoise   | 0     |
| XM_001929407.1 | ANAPC7   | midnightblue | 969.78 | 73.816  | 0.98522   | 0.00215   | 7.302    | skyblue     | 0     |
| XM_001925356.1 | RNF10    | midnightblue | 900.66 | 69.811  | 0.9737    | 0.0051    | 26.668   | grey60      | 0.43  |

|                |          |              |        |        |         |          |        |               |       |
|----------------|----------|--------------|--------|--------|---------|----------|--------|---------------|-------|
| XM_001926134.1 | CLCN3    | midnightblue | 775.52 | 71.595 | 0.97914 | 0.00361  | 4.45   | blue          | 0     |
| XM_001924460.1 | CNOT7    | midnightblue | 802.86 | 63.303 | 0.95354 | 0.01194  | 37.84  | grey60        | 0     |
| NM_214183.1    | CACNA2D1 | midnightblue | 658.23 | 67.496 | 0.96706 | 0.00714  | 9.8    | yellow        | 0     |
| NM_214213.1    | PLN      | midnightblue | 862.4  | 71.342 | 0.97829 | 0.00383  | 23.266 | brown         | --    |
| NM_214240.1    | ATP6V1H  | midnightblue | 712.6  | 66.899 | 0.96552 | 0.00765  | 25.354 | blue          | 0.297 |
| AY609472.1     | PNO1     | midnightblue | 900.22 | 67.491 | 0.96646 | 0.00733  | 13.428 | white         | 99    |
| AY609474.1     | RPF2     | midnightblue | 802.73 | 69.433 | 0.97348 | 0.00516  | 8.818  | blue          | 99    |
| AY609500.1     | CEBPG    | midnightblue | 865.18 | 77.762 | 0.99673 | 0.00022  | 18.722 | blue          | --    |
| AY610132.1     | TXNDC9   | midnightblue | 897.81 | 78.45  | 0.99846 | 7.26E-05 | 26.78  | turquoise     | 99    |
| AY610180.1     | MRPL13   | midnightblue | 911.68 | 77.767 | 0.99665 | 0.00023  | 24.578 | white         | 0     |
| CF362171       |          | midnightblue | 851.18 | 74.311 | 0.98718 | 0.00174  | 5.306  |               | --    |
| BX673587       |          | midnightblue | 901.72 | 73.42  | 0.9844  | 0.00233  | 9.424  | white         | --    |
| CK455500       |          | midnightblue | 988.47 | 75.531 | 0.99017 | 0.00117  | 9.066  | turquoise     | --    |
| CK464622       |          | midnightblue | 817.13 | 67.54  | 0.96706 | 0.00714  | 8.328  | blue          | --    |
| BX925865       |          | midnightblue | 742.89 | 71.933 | 0.98051 | 0.00326  | 3.39   |               | --    |
| BX926942       |          | midnightblue | 979.84 | 73.955 | 0.98567 | 0.00206  | 15.092 | black         | --    |
| CN155564       |          | midnightblue | 932    | 77.229 | 0.99502 | 0.00042  | 20.276 | skyblue       | --    |
| CN156505       |          | midnightblue | 925.08 | 78.547 | 0.99863 | 6.06E-05 | 7.874  | violet        | --    |
| CN157030       |          | midnightblue | 761.26 | 71.968 | 0.98057 | 0.00324  | 15.258 | turquoise     | 0.443 |
| CN157667       |          | midnightblue | 687.19 | 69.076 | 0.97166 | 0.0057   | 8.938  | yellow        | --    |
| CN158958       |          | midnightblue | 731.56 | 72.132 | 0.98099 | 0.00314  | 9.528  | turquoise     | --    |
| CN162073       |          | midnightblue | 923.58 | 73.892 | 0.98577 | 0.00203  | 81.978 | blue          | --    |
| CN164027       |          | midnightblue | 788.09 | 70.592 | 0.97652 | 0.0043   | 26.28  | grey60        | --    |
| CJ030093       |          | midnightblue | 920.25 | 78.346 | 0.99809 | 0.0001   | 7.9    | turquoise     | --    |
| DN102178       |          | midnightblue | 929.08 | 77.83  | 0.99681 | 0.00022  | 40.656 | turquoise     | --    |
| DN107722       |          | midnightblue | 898.5  | 78.587 | 0.99881 | 4.91E-05 | 10.564 | turquoise     | --    |
| DN125831       |          | midnightblue | 841.49 | 77.673 | 0.99644 | 0.00025  | 13.906 | lightgreen    | --    |
| BW956903       |          | midnightblue | 714.6  | 70.35  | 0.97574 | 0.00452  | 1.266  | black         | --    |
| AJ960573       |          | midnightblue | 840.82 | 72.238 | 0.98091 | 0.00316  | 11.038 | blue          | --    |
| CV875164       |          | midnightblue | 906.91 | 78.518 | 0.99858 | 6.45E-05 | 8.258  | blue          | --    |
| CX058800       |          | midnightblue | 930.32 | 78.16  | 0.99756 | 0.00015  | 84.47  | darkred       | --    |
| CX064653       |          | midnightblue | 854.34 | 62.704 | 0.95121 | 0.01284  | 10.446 | red           | --    |
| DY418016       |          | midnightblue | 881.44 | 77.525 | 0.99593 | 0.00031  | 10.198 | turquoise     | --    |
| DB805153       |          | midnightblue | 989.49 | 75.197 | 0.9892  | 0.00135  | 10.908 | purple        | 0.2   |
| DT320474       |          | midnightblue | 800.44 | 75.877 | 0.9915  | 0.00094  | 52.236 | midnightblue  | --    |
| DT331358       |          | midnightblue | 934.18 | 77.271 | 0.99532 | 0.00038  | 1.66   | darkturquoise | 99    |
| EV898729       |          | midnightblue | 724.74 | 71.67  | 0.97976 | 0.00345  | 6.724  | red           | --    |
| EV932107       |          | midnightblue | 844.8  | 76.677 | 0.99383 | 0.00058  | 43.566 | turquoise     | --    |
| EV983935       |          | midnightblue | 965.48 | 76.649 | 0.99328 | 0.00066  | 10.702 | turquoise     | 99    |
| EW053792       |          | midnightblue | 742.76 | 71.264 | 0.97867 | 0.00373  | 5.922  | darkgrey      | --    |
| EW177852       |          | midnightblue | 720.51 | 66.148 | 0.96311 | 0.00846  | 6.134  | black         | --    |
| EW568863       |          | midnightblue | 989.43 | 71.492 | 0.97836 | 0.00381  | 7.018  | darkturquoise | --    |
|                |          | midnightblue |        |        |         |          |        |               |       |



Table S10-9. Module eigengene and its evolutionary rates in 15 postnatal highly LDE-specific modules (LDE\_pink).

| pig_Genebank   | pig_Gene | LDE Module | kTotal | kWithin | eigencorr | eigenpval | meanExpr | LTModule      | Ka/Ks |
|----------------|----------|------------|--------|---------|-----------|-----------|----------|---------------|-------|
| DQ508264.1     | PYGM     | pink       | 860.8  | 147.68  | 0.99708   | 0.00019   | 1.592    | yellow        | 0.033 |
| NM_001044541.1 | MTX2     | pink       | 899.2  | 146.4   | 0.99521   | 0.0004    | 5.546    | blue          | 0     |
| AK234182.1     | SERHL2   | pink       | 894.6  | 149.63  | 0.99969   | 6.63E-06  | 1.476    | lightgreen    | --    |
| AK234671.1     |          | pink       | 900.2  | 147.5   | 0.99679   | 0.00022   | 2.112    | magenta       | --    |
| AK234693.1     | MOSC2    | pink       | 913.4  | 149.63  | 0.99967   | 7.34E-06  | 5.216    | darkturquoise | 99    |
| AK234702.1     | ZNF154   | pink       | 922.4  | 148.66  | 0.99826   | 8.69E-05  | 8.516    | white         | --    |
| AK237778.1     |          | pink       | 1006   | 128.14  | 0.96704   | 0.00715   | 74.428   | turquoise     | --    |
| AK234813.1     |          | pink       | 935.5  | 148.3   | 0.99772   | 0.00013   | 52.302   | yellow        | --    |
| AK231815.1     |          | pink       | 894.6  | 149.63  | 0.99969   | 6.63E-06  | 1.668    | lightgreen    | --    |
| AK238195.1     |          | pink       | 927.3  | 148.27  | 0.9977    | 0.00013   | 3.414    | yellow        | 99    |
| AK235496.1     | RUVBL2   | pink       | 895.1  | 145.08  | 0.99343   | 0.00064   | 2.396    | darkgreen     | 0     |
| AK232205.1     | HSPB7    | pink       | 978.2  | 135.54  | 0.97897   | 0.00365   | 3.664    | blue          | --    |
| AK238597.1     | C16orf72 | pink       | 894.6  | 149.63  | 0.99969   | 6.63E-06  | 0.45     | blue          | --    |
| AK232480.1     |          | pink       | 895    | 145.04  | 0.99338   | 0.00065   | 1.598    | turquoise     | --    |
| AK238947.1     | FSTL4    | pink       | 895.1  | 145.08  | 0.99343   | 0.00064   | 2.396    | sienna3       | --    |
| AK236316.1     | TRPC3    | pink       | 973.2  | 142.71  | 0.98954   | 0.00128   | 8.786    | turquoise     | --    |
| AK239290.1     | SERP1    | pink       | 833.2  | 145.02  | 0.99339   | 0.00064   | 4.222    | darkturquoise | --    |
| AK236487.1     |          | pink       | 731.3  | 134.62  | 0.97825   | 0.00384   | 27.486   | turquoise     | --    |
| AK236532.1     | RPS6KA3  | pink       | 918.9  | 149.59  | 0.99958   | 1.03E-05  | 3.456    | darkgreen     | 0     |
| AK232861.1     | GPT      | pink       | 844.9  | 147.28  | 0.99654   | 0.00024   | 3.412    | paleturquoise | --    |
| AK233062.1     |          | pink       | 941.8  | 148.27  | 0.99767   | 0.00013   | 17.092   | yellow        | --    |
| AK233154.1     |          | pink       | 970    | 145     | 0.9929    | 0.00072   | 5.034    | yellow        | --    |
| AK236758.1     |          | pink       | 976.8  | 142.41  | 0.9891    | 0.00136   | 4.278    | navy          | 99    |
| AK236782.1     | ELP4     | pink       | 894.6  | 149.63  | 0.99969   | 6.63E-06  | 1.412    |               | 0.199 |
| AK233820.1     | SETD2    | pink       | 760.5  | 137.28  | 0.98216   | 0.00285   | 3.87     | white         | 0     |
| AK234126.1     | TIMM8A   | pink       | 919.3  | 149.7   | 0.99973   | 5.44E-06  | 14.578   | darkgreen     | 99    |
| AK234149.1     | CD320    | pink       | 894.6  | 149.63  | 0.99969   | 6.63E-06  | 0.128    | grey60        | --    |
| NM_001105294.1 | KCNAB1   | pink       | 865.4  | 141.99  | 0.98916   | 0.00135   | 31.594   | violet        | 99    |
| NM_001099931.1 | FABP3    | pink       | 695.8  | 131.86  | 0.97381   | 0.00507   | 30.618   | blue          | 99    |
| NM_001123162.1 | PHGDH    | pink       | 621.7  | 120.33  | 0.95522   | 0.0113    | 5.156    | yellow        | 0     |
| XM_001924525.1 | C18orf22 | pink       | 1004   | 130.92  | 0.97146   | 0.00576   | 45.272   | lightgreen    | 99    |
| XM_001924580.1 | C15orf61 | pink       | 854.3  | 148.29  | 0.99792   | 0.00011   | 47.78    | grey60        | --    |
| XM_001924870.1 | IBTK     | pink       | 928.5  | 148.16  | 0.99753   | 0.00015   | 3.286    | lightgreen    | 0.068 |
| XM_001926476.1 | STX7     | pink       | 850.7  | 147.6   | 0.99695   | 0.0002    | 3.17     | darkred       | 0.409 |
| XM_001929668.1 | SETDB1   | pink       | 903.3  | 149.81  | 0.99992   | 8.03E-07  | 21.228   | lightgreen    | 0     |
| XM_001927918.1 | CASQ2    | pink       | 766.8  | 136.98  | 0.98177   | 0.00295   | 6.14     | black         | 0.065 |
| XM_001925028.1 | PRKD1    | pink       | 894.6  | 149.63  | 0.99969   | 6.63E-06  | 1.732    | green         | 0     |
| XM_001928468.1 | PCK2     | pink       | 694.8  | 122.05  | 0.95872   | 0.01      | 3.196    | darkturquoise | 0.311 |
| XM_001925622.1 | HAPLN3   | pink       | 920.9  | 148.82  | 0.99849   | 7.03E-05  | 2.898    | lightgreen    | 0     |
| XM_001928454.1 | GNL3     | pink       | 894.6  | 149.63  | 0.99969   | 6.63E-06  | 1.54     | blue          | 0.565 |
| XM_001925662.1 | PITX3    | pink       | 970.5  | 143.65  | 0.99092   | 0.00104   | 7.08     | blue          | 0     |
| XM_001927272.1 | ACTN2    | pink       | 747.9  | 138.03  | 0.98319   | 0.00261   | 108.904  | blue          | 0     |
| XM_001929445.1 | MMP11    | pink       | 894.6  | 149.63  | 0.99969   | 6.63E-06  | 1.348    | darkturquoise | 99    |
| XM_001926068.1 | ESF1     | pink       | 894.6  | 149.63  | 0.99969   | 6.63E-06  | 1.604    | darkturquoise | 99    |
| XM_001927947.1 | SRXN1    | pink       | 838.6  | 145.44  | 0.99397   | 0.00056   | 10.006   | darkturquoise | --    |
| XM_001928889.1 | ACOT8    | pink       | 957    | 146.62  | 0.99525   | 0.00039   | 17.638   | black         | 0.067 |

|                |          |      |       |        |         |          |        |               |       |
|----------------|----------|------|-------|--------|---------|----------|--------|---------------|-------|
| XM_001929453.1 |          | pink | 946.5 | 145.64 | 0.9939  | 0.00057  | 4.67   | darkred       | 0     |
| NM_213791.1    | MYL2     | pink | 847.9 | 147.7  | 0.99711 | 0.00019  | 5.272  | lightgreen    | --    |
| NM_214189.1    | INHA     | pink | 895.2 | 149.33 | 0.99928 | 2.30E-05 | 9.284  | red           | 0     |
| NM_214339.1    | DNAJA4   | pink | 718.4 | 131.02 | 0.97279 | 0.00537  | 17.852 | blue          | 99    |
| AY609581.1     | C4orf46  | pink | 629.3 | 118.45 | 0.95204 | 0.01252  | 4.978  | darkred       | 99    |
| AY609808.1     | GALT     | pink | 993.4 | 131.41 | 0.97243 | 0.00547  | 15.138 | brown         | 99    |
| AY609968.1     | COMMD3   | pink | 983.2 | 139.7  | 0.98507 | 0.00219  | 55.714 | darkgreen     | 99    |
| AY610017.1     | CCT6A    | pink | 894.6 | 149.63 | 0.99969 | 6.63E-06 | 1.604  | darkgreen     | --    |
| AY610106.1     | PLA2G7   | pink | 894.6 | 149.63 | 0.99969 | 6.63E-06 | 1.796  | lightgreen    | 0.083 |
| NM_001012613.1 | SLC7A1   | pink | 894.6 | 149.63 | 0.99969 | 6.63E-06 | 3.53   | darkred       | 99    |
| NM_001033009.1 | ITGB1BP2 | pink | 936.7 | 149.01 | 0.9987  | 5.62E-05 | 88.628 | yellow        | --    |
| NM_001037322.1 | ST8SIA4  | pink | 952.9 | 147.18 | 0.99608 | 0.00029  | 11.766 | yellow        | 0     |
| CF177183       |          | pink | 892.5 | 144.09 | 0.99204 | 0.00085  | 5.94   | lightyellow   | --    |
| CF178442       |          | pink | 872.1 | 148.91 | 0.99876 | 5.26E-05 | 77.926 |               | --    |
| CF179357       |          | pink | 887.3 | 140.85 | 0.98733 | 0.00171  | 7.674  | lightgreen    | --    |
| CF180095       |          | pink | 1016  | 127.99 | 0.96673 | 0.00725  | 19.756 | white         | --    |
| CF181085       |          | pink | 842.4 | 140.95 | 0.98771 | 0.00163  | 15.742 | violet        | --    |
| CF360725       |          | pink | 710.7 | 130.9  | 0.97264 | 0.00541  | 10.314 | midnightblue  | --    |
| CF362081       |          | pink | 863.6 | 148.75 | 0.99855 | 6.65E-05 | 11.062 | white         | --    |
| CF366098       |          | pink | 931.2 | 148.22 | 0.99763 | 0.00014  | 5.694  | yellow        | --    |
| CF368599       |          | pink | 851.3 | 146.17 | 0.995   | 0.00042  | 3.474  | turquoise     | --    |
| CF792402       |          | pink | 894.6 | 149.63 | 0.99969 | 6.63E-06 | 1.412  | yellow        | --    |
| CF793177       |          | pink | 952.9 | 145.89 | 0.99424 | 0.00052  | 3.4    | yellow        | --    |
| CF793308       |          | pink | 974.7 | 144.85 | 0.99264 | 0.00076  | 15.73  | turquoise     | --    |
| CF795779       |          | pink | 908.1 | 149.57 | 0.9996  | 9.68E-06 | 9.938  | yellow        | --    |
| BX666875       |          | pink | 981   | 142.57 | 0.9893  | 0.00133  | 4.81   | yellow        | --    |
| BX667822       |          | pink | 984.4 | 141.92 | 0.98837 | 0.0015   | 23.446 | blue          | --    |
| BX670717       |          | pink | 949.2 | 147.96 | 0.99719 | 0.00018  | 3.622  | darkred       | --    |
| BX674049       |          | pink | 926.8 | 148.33 | 0.99778 | 0.00013  | 3.478  | grey60        | --    |
| BX675434       |          | pink | 567.9 | 103.34 | 0.92532 | 0.02422  | 25.746 | darkmagenta   | --    |
| BP169289       |          | pink | 892.5 | 144.93 | 0.99319 | 0.00067  | 44.208 | violet        | --    |
| BP172747       |          | pink | 895   | 145.04 | 0.99338 | 0.00065  | 1.598  | darkturquoise | --    |
| BP440567       |          | pink | 815.6 | 135.95 | 0.98032 | 0.0033   | 10.864 | red           | 99    |
| CK455612       |          | pink | 742.3 | 135.67 | 0.97971 | 0.00346  | 16.96  | turquoise     | --    |
| CK457857       |          | pink | 911.3 | 149.78 | 0.99987 | 1.77E-06 | 4.632  | turquoise     | --    |
| CK459217       |          | pink | 894.6 | 149.63 | 0.99969 | 6.63E-06 | 1.54   | lightgreen    | --    |
| CK460594       |          | pink | 836.6 | 146.02 | 0.99481 | 0.00045  | 17.188 | grey60        | --    |
| CK460617       |          | pink | 864.4 | 144.68 | 0.99296 | 0.00071  | 1.65   | blue          | --    |
| CK461051       |          | pink | 607.9 | 116.07 | 0.94785 | 0.01418  | 110.26 | tan           | --    |
| CK461743       |          | pink | 976.4 | 137.43 | 0.98183 | 0.00293  | 1.286  | tan           | --    |
| CK462736       |          | pink | 894.6 | 149.63 | 0.99969 | 6.63E-06 | 1.668  | darkturquoise | --    |
| CK466076       |          | pink | 894.6 | 149.63 | 0.99969 | 6.63E-06 | 1.476  | turquoise     | --    |
| CK467678       |          | pink | 858.8 | 147.49 | 0.99681 | 0.00022  | 1.528  | darkorange    | 99    |
| BX917298       |          | pink | 895   | 145.04 | 0.99338 | 0.00065  | 1.598  | darkgreen     | 0.074 |
| BX926632       |          | pink | 931.5 | 148.88 | 0.99854 | 6.72E-05 | 17.44  | yellow        | --    |
| CN167094       |          | pink | 880.7 | 149.24 | 0.9992  | 2.74E-05 | 3.196  | lightgreen    | --    |
| CJ009195       |          | pink | 832.4 | 146.16 | 0.995   | 0.00042  | 13.632 | tan           | --    |
| CJ013911       |          | pink | 915.5 | 146.31 | 0.995   | 0.00042  | 4.044  | yellow        | --    |
| CJ021696       |          | pink | 901.6 | 149.46 | 0.99943 | 1.61E-05 | 5.644  | yellow        | --    |
| DN101037       |          | pink | 934.9 | 143.15 | 0.9904  | 0.00113  | 3.692  | white         | --    |
| DN102999       |          | pink | 891.7 | 149.37 | 0.99934 | 2.05E-05 | 5.476  | blue          | --    |

|          |      |       |        |         |          |        |               |       |
|----------|------|-------|--------|---------|----------|--------|---------------|-------|
| DN106999 | pink | 601.6 | 116.48 | 0.94876 | 0.01382  | 9.964  | white         | 99    |
| DN111044 | pink | 940.9 | 148.79 | 0.99837 | 7.89E-05 | 13.004 | yellow        | --    |
| DN112956 | pink | 665.2 | 117.05 | 0.95049 | 0.01312  | 56.998 | white         | --    |
| DN114696 | pink | 932.7 | 149.2  | 0.99899 | 3.87E-05 | 5.738  | yellow        | --    |
| DN121970 | pink | 911.6 | 147.52 | 0.99678 | 0.00022  | 4.748  | green         | 0.574 |
| DN129771 | pink | 812.1 | 144.97 | 0.99331 | 0.00066  | 7.588  | lightgreen    | --    |
| AJ946727 | pink | 847.6 | 146.29 | 0.99517 | 0.0004   | 2.544  | paleturquoise | --    |
| AJ947285 | pink | 926.9 | 148.32 | 0.99776 | 0.00013  | 2.32   | tan           | --    |
| AJ947409 | pink | 908.4 | 149.02 | 0.9988  | 4.97E-05 | 15.058 | lightgreen    | --    |
| AJ948686 | pink | 762.2 | 132.37 | 0.975   | 0.00473  | 155.31 | sienna3       | --    |
| AJ951943 | pink | 947.1 | 147.76 | 0.9969  | 0.00021  | 23.78  | yellow        | --    |
| AJ951950 | pink | 990.1 | 141.4  | 0.98755 | 0.00166  | 4.99   | skyblue       | --    |
| AJ953116 | pink | 894.6 | 149.63 | 0.99969 | 6.63E-06 | 1.862  | navy          | --    |
| AJ956904 | pink | 813.2 | 138.03 | 0.98346 | 0.00255  | 5.25   | navy          | --    |
| AJ957127 | pink | 850.6 | 148.1  | 0.99766 | 0.00014  | 3.666  | yellow        | --    |
| AJ960206 | pink | 936.5 | 145.35 | 0.99357 | 0.00062  | 18.072 | red           | --    |
| AJ961441 | pink | 583.5 | 113.03 | 0.94235 | 0.01647  | 45.134 | turquoise     | --    |
| AJ962837 | pink | 824.2 | 143.39 | 0.99111 | 0.00101  | 6.784  | midnightblue  | --    |
| AJ963372 | pink | 940.7 | 148.63 | 0.99816 | 9.50E-05 | 42.192 | yellow        | --    |
| AJ963878 | pink | 930.3 | 149.18 | 0.99896 | 4.04E-05 | 8.584  | lightyellow   | --    |
| AJ964171 | pink | 897.9 | 148.1  | 0.99763 | 0.00014  | 17.29  | darkgreen     | --    |
| AJ940806 | pink | 885.3 | 148.17 | 0.99769 | 0.00013  | 16.784 | lightgreen    | --    |
| AJ944342 | pink | 893.1 | 149.64 | 0.99971 | 5.87E-06 | 22.29  | yellow        | --    |
| DY406031 | pink | 842.3 | 141.85 | 0.989   | 0.00138  | 3.172  | navy          | --    |
| DY406679 | pink | 828.6 | 146.09 | 0.9949  | 0.00044  | 7.874  | turquoise     | --    |
| DY415294 | pink | 925   | 149.27 | 0.9991  | 3.22E-05 | 27.704 | red           | --    |
| DY437127 | pink | 967   | 143.9  | 0.99135 | 0.00096  | 7.316  | turquoise     | --    |
| DB808485 | pink | 923.9 | 149.07 | 0.99882 | 4.88E-05 | 14.528 | yellow        | --    |
| DB809778 | pink | 926.4 | 149.32 | 0.99917 | 2.88E-05 | 35.868 | yellow        | --    |
| DB812928 | pink | 990.3 | 139.84 | 0.98522 | 0.00215  | 2.844  | violet        | --    |
| DT322875 | pink | 961.8 | 133.69 | 0.97616 | 0.0044   | 645.53 | darkmagenta   | --    |
| EV860684 | pink | 906.5 | 149.82 | 0.99992 | 8.38E-07 | 8.908  | lightgreen    | --    |
| EV867707 | pink | 936.8 | 147.99 | 0.99727 | 0.00017  | 4.94   | lightgreen    | --    |
| EV907972 | pink | 915.6 | 148.31 | 0.9978  | 0.00012  | 3.402  | yellow        | --    |
| EV931277 | pink | 894.6 | 149.63 | 0.99969 | 6.63E-06 | 1.476  | greenyellow   | --    |
| EV936208 | pink | 925   | 148.5  | 0.99802 | 0.00011  | 4.96   | darkgreen     | --    |
| EV987323 | pink | 894.6 | 149.63 | 0.99969 | 6.63E-06 | 0.514  | violet        | --    |
| EW038837 | pink | 972.6 | 143.6  | 0.99083 | 0.00105  | 5.378  | lightyellow   | --    |
| EW097961 | pink | 894.6 | 149.63 | 0.99969 | 6.63E-06 | 1.796  | blue          | --    |
| EW216894 | pink | 958.5 | 145.39 | 0.9935  | 0.00063  | 6.636  | yellow        | --    |
| EW239772 | pink | 894.6 | 149.63 | 0.99969 | 6.63E-06 | 0.128  | grey60        | --    |
| EW261894 | pink | 897   | 145.9  | 0.99458 | 0.00048  | 1.726  | yellow        | --    |
| EW280550 | pink | 885.5 | 148.79 | 0.99856 | 6.58E-05 | 4.336  | purple        | --    |
| EW286124 | pink | 974.4 | 142.46 | 0.98918 | 0.00135  | 4.718  | turquoise     | --    |
| EW303282 | pink | 925.5 | 143.89 | 0.99158 | 0.00093  | 3.346  | yellow        | --    |
| EW305327 | pink | 894.6 | 149.63 | 0.99969 | 6.63E-06 | 2.182  | darkred       | --    |
| EW333024 | pink | 927.4 | 148.09 | 0.99747 | 0.00015  | 27.404 | red           | --    |
| EW418907 | pink | 688.9 | 121.39 | 0.95774 | 0.01036  | 6.476  | blue          | --    |
| EW464371 | pink | 797   | 143.27 | 0.9909  | 0.00104  | 40.888 | turquoise     | --    |
| EW595278 | pink | 618.4 | 118.28 | 0.95189 | 0.01258  | 14.35  | black         | 99    |
| EX655853 | pink | 847.6 | 146.29 | 0.99517 | 0.0004   | 2.544  | darkred       | --    |

|          |      |       |        |         |          |        |             |    |
|----------|------|-------|--------|---------|----------|--------|-------------|----|
| BF198544 | pink | 938.8 | 146.69 | 0.99543 | 0.00037  | 1.614  | yellow      | -- |
| BQ598384 | pink | 942   | 144.79 | 0.99282 | 0.00073  | 7.256  | yellow      | -- |
| BF710584 | pink | 804.5 | 141.39 | 0.98822 | 0.00153  | 2.892  | purple      | -- |
| BQ597815 | pink | 897.8 | 146.26 | 0.99507 | 0.00042  | 1.79   | purple      | -- |
| BI183745 | pink | 668.6 | 125.49 | 0.96377 | 0.00823  | 2.966  | red         | -- |
| BI184334 | pink | 897.1 | 148.68 | 0.99837 | 7.90E-05 | 3.52   | magenta     | -- |
| BI401798 | pink | 1003  | 132.19 | 0.97357 | 0.00514  | 4.676  | navy        | -- |
| BI401840 | pink | 894.6 | 149.63 | 0.99969 | 6.63E-06 | 1.09   | lightyellow | -- |
| BI402468 | pink | 982.1 | 132.55 | 0.97427 | 0.00493  | 10.164 | red         | -- |
| BM659726 | pink | 925.3 | 148.58 | 0.99815 | 9.55E-05 | 3.646  | lightgreen  | -- |

---

Table S10-10. Module eigengene and its evolutionary rates in 15 postnatal highly LDE-specific modules (LDE\_purple).

| pig_Genebank    | pig_Gene  | LDE Module | kTotal | kWithin | eigencorr | eigenpval | meanExpr | LTModule      | Ka/Ks  |
|-----------------|-----------|------------|--------|---------|-----------|-----------|----------|---------------|--------|
| AK237496.1      | C16orf61  | purple     | 212.45 | 46.2877 | 0.87598   | 0.051445  | 10.888   |               | --     |
| AK237517.1      | MRPS6     | purple     | 233.95 | 44.741  | 0.86967   | 0.055362  | 24.31    | lightcyan     | --     |
| AK231197.1      | RPL36     | purple     | 231.63 | 49.807  | 0.89025   | 0.042918  | 426.966  | red           | 99     |
| AK237867.1      | SMYD2     | purple     | 182.66 | 42.5058 | 0.86284   | 0.059707  | 52.864   | green         | 0      |
| AK231453.1      |           | purple     | 293.43 | 77.8571 | 0.99249   | 0.00078   | 7.62     | turquoise     | --     |
| AK235913.1      | FHOD1     | purple     | 279.84 | 76.295  | 0.98816   | 0.001545  | 135.132  | orange        | 1.2135 |
| AK232557.1      | CAST      | purple     | 303.72 | 75.569  | 0.98457   | 0.002296  | 20.778   | red           | --     |
| AK236151.1      | LEPROT    | purple     | 257.42 | 64.6297 | 0.94986   | 0.013375  | 6.67     | darkorange    | --     |
| AK232929.1      | LMAN2L    | purple     | 303.95 | 75.3182 | 0.98446   | 0.002321  | 44.658   | pink          | --     |
| AK239728.1      | DNAJB6    | purple     | 285.69 | 77.6231 | 0.99213   | 0.000836  | 73.714   | red           | 99     |
| AK236587.1      | GYG1      | purple     | 276.44 | 74.0479 | 0.98111   | 0.003108  | 235.772  | green         | 99     |
| AK236686.1      | ZNF134    | purple     | 223.09 | 50.5495 | 0.88963   | 0.043279  | 18.196   | turquoise     | 99     |
| AK236973.1      | PLCL2     | purple     | 197.61 | 43.7296 | 0.86454   | 0.058619  | 40.214   | lightcyan     | --     |
| AB292846.1      | NME1-NME2 | purple     | 302.05 | 78.5426 | 0.994     | 0.000558  | 107.41   | red           | --     |
| 1NM1_001091414. | COX7C     | purple     | 241.59 | 49.7914 | 0.89124   | 0.042347  | 553.29   | pink          | 0      |
| 1NM1_001112090. | TNFSF13   | purple     | 288.95 | 79.9821 | 0.9994    | 1.78E-05  | 11.448   | navy          | --     |
| 1NM1_001924113. |           | purple     | 258.59 | 73.7403 | 0.98307   | 0.002636  | 23.472   | darkorange    | 0      |
| 1NM1_001926143. | ELL3      | purple     | 290.59 | 79.5371 | 0.99782   | 0.000122  | 6.112    | brown         | 0.2297 |
| 1NM1_001924332. | SLC22A16  | purple     | 148.37 | 39.6767 | 0.84219   | 0.07345   | 9.742    | paleturquoise | 0      |
| 1NM1_001920219. | C1orf183  | purple     | 285.98 | 79.2637 | 0.99744   | 0.000155  | 8.68     | darkorange    | 0      |
| 1NM1_001923013. | TPD52     | purple     | 225.68 | 64.1194 | 0.95272   | 0.012253  | 19.742   | pink          | 0      |
| 1NM1_001921180. | ATP6V1E1  | purple     | 256.83 | 57.8645 | 0.92249   | 0.025601  | 24.806   | red           | 0      |
| 1NM1_001929341. | ABCF1     | purple     | 304.21 | 74.4423 | 0.98161   | 0.002985  | 31.47    | blue          | 0      |
| 1NM1_001920223. |           | purple     | 270.31 | 68.1145 | 0.95905   | 0.009887  | 70.666   | blue          | 0      |
| 1NM1_001929009. | ZRANB1    | purple     | 145.28 | 36.2319 | 0.81551   | 0.092445  | 39.698   | blue          | 0.1315 |
| 1NM1_001923019. | LOC388789 | purple     | 255.03 | 69.9215 | 0.96927   | 0.006436  | 16.212   | skyblue       | 0      |
| 1NM1_001921209. | CETN2     | purple     | 233.11 | 45.0677 | 0.86841   | 0.056155  | 21.206   | lightcyan     | --     |
| 1               |           |            |        |         |           |           |          |               |        |
| NM_213781.1     | SCD       | purple     | 299.32 | 79.0799 | 0.99586   | 0.00032   | 11.118   | turquoise     | 0      |
| NM_214391.1     | FCGR3B    | purple     | 240.3  | 63.8995 | 0.94792   | 0.014155  | 24.604   | midnightblue  | --     |
| AY609726.1      | ARF6      | purple     | 272.91 | 77.0326 | 0.99221   | 0.000825  | 15.618   | red           | 0      |
| AY609732.1      | PPP2CB    | purple     | 250.59 | 66.7863 | 0.95679   | 0.01071   | 46.658   | royalblue     | 0      |
| AY610127.1      | AK1       | purple     | 275.88 | 67.2125 | 0.95815   | 0.010212  | 2090.66  | brown         | 0      |
| AY610374.1      | RPL27A    | purple     | 307.32 | 72.7516 | 0.97614   | 0.004408  | 130.65   | blue          | 99     |
| AY803100.1      | CDC25B    | purple     | 294.16 | 77.9776 | 0.99203   | 0.000854  | 3.562    | brown         | --     |
| CF175213        |           | purple     | 207.05 | 58.4349 | 0.93083   | 0.021611  | 138.328  | blue          | --     |
| CF791685        |           | purple     | 148.07 | 39.8696 | 0.84005   | 0.074918  | 25.174   | blue          | --     |
| BX675792        |           | purple     | 199.8  | 54.5783 | 0.91456   | 0.029591  | 31.928   | skyblue       | --     |
| BX676378        |           | purple     | 268.23 | 65.8664 | 0.95464   | 0.011519  | 75.458   | red           | 99     |
| BP169130        |           | purple     | 283.81 | 78.0372 | 0.99417   | 0.000534  | 13.2     | darkorange    | --     |
| BX915963        |           | purple     | 276.49 | 75.7093 | 0.98632   | 0.001916  | 21.44    | purple        | --     |
| BX918525        |           | purple     | 254.32 | 64.6739 | 0.95049   | 0.013125  | 9.776    | brown         | --     |
| BX918740        |           | purple     | 305.68 | 74.8577 | 0.98253   | 0.002765  | 7.004    | navy          | --     |
| BX925093        |           | purple     | 229.39 | 51.4208 | 0.89382   | 0.040868  | 10.42    | blue          | --     |
| CN156474        |           | purple     | 262.82 | 66.3498 | 0.95482   | 0.011449  | 21.944   | orange        | --     |
| CN156870        |           | purple     | 274.11 | 71.4233 | 0.97181   | 0.005658  | 35.916   | brown         | --     |

|          |        |        |         |         |          |          |              |    |    |
|----------|--------|--------|---------|---------|----------|----------|--------------|----|----|
| DN101101 | purple | 218.59 | 61.9663 | 0.94133 | 0.016908 | 31.89    | green        | -- |    |
| DN104456 | purple | 264.29 | 62.9407 | 0.9421  | 0.016578 | 205.098  | red          | -- |    |
| DN111525 | purple | 288.93 | 79.0532 | 0.99629 | 0.000271 | 495.626  | red          | -- |    |
| DN116503 | purple | 113.37 | 21.153  | 0.72451 | 0.166215 | 25.598   | red          | -- |    |
| DN117644 | purple | 212.99 | 55.4514 | 0.91784 | 0.02792  | 19.614   | purple       | -- |    |
| DN118440 | purple | 289.74 | 77.3558 | 0.99118 | 0.000993 | 24.35    | green        | -- |    |
| DN121905 | purple | 286.48 | 79.7926 | 0.99907 | 3.42E-05 | 54.07    | turquoise    | -- |    |
| DR082636 | purple | 215.01 | 52.9985 | 0.90371 | 0.035348 | 29.486   | green        | -- |    |
| DR082404 | purple | 230.21 | 64.7959 | 0.95133 | 0.012796 | 1781.64  | green        | -- |    |
| AJ962420 | purple | 307.93 | 74.7262 | 0.9823  | 0.002818 | 7.252    | red          | -- |    |
| AJ962691 | purple | 248.36 | 59.4246 | 0.93024 | 0.021885 | 6.106    | midnightblue | -- |    |
| DV904076 | purple | 300.62 | 76.2315 | 0.98648 | 0.001882 | 5564.096 | pink         | -- |    |
| DY437818 | purple | 252.3  | 59.0443 | 0.92975 | 0.022113 | 17.926   | pink         | -- |    |
| EB684337 | purple | 239.33 | 68.7068 | 0.96631 | 0.007386 | 27.248   | midnightblue | -- |    |
| DB809172 | purple | 251.46 | 66.1762 | 0.95849 | 0.010089 | 13.638   | magenta      | -- |    |
| DB814005 | purple | 292.52 | 74.456  | 0.9822  | 0.002842 | 188.322  | midnightblue | -- |    |
| DB814157 | purple | 297.62 | 78.2311 | 0.99286 | 0.000723 | 8.46     | turquoise    | -- |    |
| DB816263 | purple | 297.25 | 78.9782 | 0.99545 | 0.000368 | 25.656   | brown        | -- |    |
| DB805355 | purple | 228.8  | 64.0629 | 0.9481  | 0.014082 | 87.934   | brown        | -- | 0  |
| EV892254 | purple | 262.95 | 66.4372 | 0.95592 | 0.011034 | 16.632   | tan          | -- |    |
| EV928670 | purple | 202.04 | 46.6025 | 0.88003 | 0.048973 | 32.198   | turquoise    | -- |    |
| EH412677 | purple | 296.48 | 79.5411 | 0.99709 | 0.000188 | 29.262   | turquoise    | -- |    |
| EV936704 | purple | 291.86 | 80.2206 | 0.99973 | 5.20E-06 | 36.304   | brown        | -- |    |
| EV958332 | purple | 299.64 | 74.5542 | 0.98228 | 0.002824 | 11.506   | blue         | -- |    |
| EV984595 | purple | 279.36 | 74.8607 | 0.98271 | 0.002722 | 94.166   | red          | -- |    |
| EV986754 | purple | 168.61 | 44.3608 | 0.87053 | 0.054825 | 5.518    | navy         | -- |    |
| EW079337 | purple | 281.02 | 77.9718 | 0.99443 | 0.000498 | 20.676   | turquoise    | -- |    |
| EW089029 | purple | 310.57 | 72.5515 | 0.97575 | 0.004517 | 15.91    | brown        | -- |    |
| EW093873 | purple | 281.38 | 69.6179 | 0.96588 | 0.007526 | 5.994    | pink         | -- |    |
| EW111843 | purple | 299.26 | 77.7003 | 0.99123 | 0.000984 | 8.294    | turquoise    | -- |    |
| EW150944 | purple | 138.96 | 32.8185 | 0.79317 | 0.109346 | 45.506   | midnightblue | -- |    |
| EW161383 | purple | 204.6  | 52.5072 | 0.90614 | 0.034027 | 36.374   | purple       | -- |    |
| EW169113 | purple | 294    | 75.8805 | 0.9866  | 0.001858 | 7.782    | turquoise    | -- |    |
| EW176591 | purple | 284.15 | 78.599  | 0.99544 | 0.000369 | 8.656    | red          | -- |    |
| EW241204 | purple | 261.26 | 65.5736 | 0.9504  | 0.013163 | 13.952   |              | -- |    |
| EW249451 | purple | 220.82 | 56.6486 | 0.92116 | 0.026257 | 112.576  | purple       | -- | 0  |
| EW261110 | purple | 295.27 | 78.7221 | 0.99505 | 0.000417 | 13.864   | turquoise    | -- |    |
| EW268386 | purple | 305.1  | 76.1283 | 0.98644 | 0.001892 | 10.708   | yellow       | -- | 0  |
| EW299585 | purple | 240.66 | 54.1439 | 0.91332 | 0.030232 | 26.768   | orange       | -- |    |
| EW301853 | purple | 294.41 | 76.8223 | 0.98916 | 0.001352 | 5.302    | brown        | -- |    |
| EW314396 | purple | 273.28 | 76.9921 | 0.9912  | 0.00099  | 38.5     | navy         | -- |    |
| EW384324 | purple | 271.46 | 76.1914 | 0.98872 | 0.001436 | 5.09     | navy         | -- |    |
| EW446752 | purple | 304.4  | 76.2283 | 0.98709 | 0.001758 | 6.024    | blue         | -- |    |
| EW471619 | purple | 237.76 | 67.476  | 0.96268 | 0.008605 | 731.748  | midnightblue | -- |    |
| EW472852 | purple | 267.04 | 74.7903 | 0.9847  | 0.002266 | 19.74    | green        | -- | 99 |
| EW528311 | purple | 306.42 | 76.3256 | 0.98734 | 0.001706 | 25.312   |              | -- |    |
| EW587403 | purple | 282.75 | 78.6253 | 0.99613 | 0.000289 | 5.746    | lightgreen   | -- |    |
| EW595558 | purple | 191.69 | 46.493  | 0.87319 | 0.053163 | 1008.516 | midnightblue | -- |    |
| EW611242 | purple | 289.68 | 78.5487 | 0.99426 | 0.000521 | 33.242   | brown        | -- |    |
| EW629816 | purple | 203.07 | 49      | 0.89242 | 0.041667 | 14.254   | brown        | -- |    |
| AW231897 | purple | 295.24 | 79.9108 | 0.9986  | 6.29E-05 | 15.684   | blue         | -- |    |

|          |        |        |         |         |          |        |           |    |    |
|----------|--------|--------|---------|---------|----------|--------|-----------|----|----|
| BI400253 | purple | 306.74 | 74.5825 | 0.9821  | 0.002867 | 60.938 | royalblue | -- |    |
| BI182836 | purple | 241.85 | 52.8867 | 0.9072  | 0.033461 | 24.142 | blue      |    | 99 |
| BI185434 | purple | 285    | 78.8425 | 0.99645 | 0.000253 | 8.93   | pink      | -- |    |
| BM190470 | purple | 281.4  | 71.974  | 0.97407 | 0.004994 | 4.432  | brown     | -- |    |
| CA779010 | purple | 281.47 | 77.3017 | 0.99125 | 0.000981 | 38.982 | lightcyan | -- |    |

---

Table S10-11. Module eigengene and its evolutionary rates in 15 postnatal highly LDE-specific modules (LDE\_red).

| pig_Genebank   | pig_Gene | LDE    |     | kTotal    | kWithin  | eigencorr | eigenpval | meanExpr | LTModule   | Ka/Ks  |
|----------------|----------|--------|-----|-----------|----------|-----------|-----------|----------|------------|--------|
|                |          | Module | red |           |          |           |           |          |            |        |
| AF319661.1     | DDX58    | red    |     | 913.65807 | 125.1059 | 0.995004  | 0.000424  | 2.626    | yellow     | --     |
| AK234216.1     |          | red    |     | 901.00883 | 126.8797 | 0.998079  | 0.000101  | 4.036    | yellow     | --     |
| AK240376.1     | RPL17P4  | red    |     | 994.74738 | 115.0161 | 0.976786  | 0.004231  | 61.678   | black      | --     |
| AK240398.1     | ACAD9    | red    |     | 957.63475 | 123.3656 | 0.991777  | 0.000894  | 9.194    | blue       | 0      |
| AK230922.1     | METTL1   | red    |     | 691.43369 | 104.5757 | 0.958691  | 0.010016  | 4.176    | blue       | --     |
| AK240599.1     | FTSJ2    | red    |     | 917.55432 | 124.9813 | 0.994814  | 0.000448  | 11.08    | blue       | --     |
| AK234682.1     | APH1A    | red    |     | 956.98073 | 121.0054 | 0.987676  | 0.001639  | 0.972    | grey60     | --     |
| AK231373.1     |          | red    |     | 864.47075 | 125.7806 | 0.99635   | 0.000265  | 4.38     | yellow     | 99     |
| AK238068.1     |          | red    |     | 478.32021 | 79.20459 | 0.902978  | 0.035745  | 7.648    | darkred    | --     |
| AK238113.1     |          | red    |     | 931.76331 | 126.7145 | 0.997617  | 0.00014   | 3.212    | lightgreen | --     |
| AK234969.1     |          | red    |     | 893.18817 | 124.7317 | 0.994526  | 0.000486  | 5.554    | darkred    | --     |
| AK234990.1     |          | red    |     | 758.83614 | 116.2891 | 0.980419  | 0.003279  | 1.954    | yellow     | --     |
| AK235023.1     |          | red    |     | 945.23832 | 124.8724 | 0.994387  | 0.000504  | 1.358    | lightgreen | --     |
| AK235076.1     | MFSD8    | red    |     | 860.27555 | 124.4075 | 0.994091  | 0.000545  | 3.702    | yellow     | 0.184  |
| AK231855.1     | ABHD11   | red    |     | 893.15251 | 126.5318 | 0.997562  | 0.000144  | 20.452   | turquoise  | 99     |
| AK231927.1     |          | red    |     | 917.20999 | 127.2863 | 0.998598  | 6.30E-05  | 3.082    | lightgreen | --     |
| AK235508.1     | PAPSS1   | red    |     | 825.84961 | 121.2253 | 0.988976  | 0.001387  | 5.18     | turquoise  | --     |
| AK238751.1     | RNF8     | red    |     | 799.45382 | 116.3184 | 0.98061   | 0.003232  | 2.174    | royalblue  | --     |
| AK238837.1     | ZBTB8OS  | red    |     | 987.66865 | 117.1821 | 0.980895  | 0.003161  | 35.526   | turquoise  | --     |
| AK236288.1     | DIS3L    | red    |     | 888.14051 | 124.5843 | 0.994239  | 0.000525  | 5.596    | yellow     | --     |
| AK236349.1     |          | red    |     | 852.28699 | 125.8689 | 0.996559  | 0.000242  | 5.452    | yellow     | --     |
| AK230543.1     | CLEC7A   | red    |     | 894.62975 | 127.5842 | 0.999251  | 2.46E-05  | 2.438    | darkred    | 0.2755 |
| AK236478.1     | PRMT5    | red    |     | 824.65027 | 122.5679 | 0.991097  | 0.001007  | 67.94    | violet     | --     |
| AK236482.1     |          | red    |     | 760.06663 | 115.6475 | 0.979203  | 0.003589  | 5.59     | turquoise  | --     |
| AK239676.1     | RSL1D1   | red    |     | 767.45465 | 114.0883 | 0.976372  | 0.004344  | 23.138   | white      | --     |
| AK239731.1     | AFF3     | red    |     | 872.67918 | 126.5108 | 0.997608  | 0.00014   | 8.55     | darkred    | 0.2063 |
| AK239743.1     | PLEKHO2  | red    |     | 932.04923 | 127.0653 | 0.998211  | 9.08E-05  | 7.638    | darkgreen  | --     |
| AK233007.1     |          | red    |     | 921.04355 | 127.7156 | 0.999334  | 2.06E-05  | 200.636  | yellow     | --     |
| AK236743.1     | SGPL1    | red    |     | 902.07225 | 125.177  | 0.995277  | 0.000389  | 13.696   | darkred    | --     |
| AK237272.1     | HSPB6    | red    |     | 837.64075 | 123.3596 | 0.992532  | 0.000774  | 91.996   | turquoise  | --     |
| NM_213824.2    | TP53     | red    |     | 688.9285  | 108.1017 | 0.96545   | 0.007669  | 6.396    | blue       | --     |
| NM_001005152.2 | FGL2     | red    |     | 976.68448 | 119.4312 | 0.984954  | 0.00221   | 9.006    | white      | 0      |
| AB271920.1     | ADAMTS2  | red    |     | 923.25583 | 123.8154 | 0.992852  | 0.000725  | 4.388    | turquoise  | 0.6218 |
| EF468461.1     |          | red    |     | 740.53342 | 113.5805 | 0.975552  | 0.004572  | 3.644    | violet     | --     |
| NM_001101827.1 | MKI67IP  | red    |     | 965.55813 | 121.3097 | 0.988291  | 0.001518  | 31.556   | white      | 0      |
| NM_001111257.1 | LMNA     | red    |     | 932.29467 | 125.7967 | 0.996146  | 0.000287  | 27.128   | violet     | 0.1866 |
| XM_001927375.1 | NSMAF    | red    |     | 784.19887 | 114.9359 | 0.978128  | 0.00387   | 5.724    | black      | 0.0736 |
| XM_001925784.1 | USP5     | red    |     | 901.22843 | 126.7253 | 0.997773  | 0.000126  | 11.164   | tan        | 0      |
| XM_001928014.1 | GMPR2    | red    |     | 917.25604 | 125.3738 | 0.995437  | 0.00037   | 29.94    | orange     | 99     |
| XM_001929510.1 | GTPBP2   | red    |     | 953.13388 | 120.7126 | 0.987239  | 0.001727  | 10.718   | grey60     | --     |
| XM_001925300.1 | OXNAD1   | red    |     | 867.37383 | 125.0467 | 0.995109  | 0.00041   | 31.006   | black      | 0.2142 |
| XM_001928803.1 | EXOSC1   | red    |     | 667.02878 | 99.74286 | 0.950039  | 0.013304  | 9.73     | turquoise  | 0      |
| XM_001929155.1 | COMTD1   | red    |     | 609.36606 | 95.76364 | 0.940901  | 0.017093  | 8.17     | black      | --     |
| XM_001926296.1 | C22orf36 | red    |     | 873.43045 | 126.7124 | 0.997942  | 0.000112  | 14.72    | black      | 0.2048 |



|                |          |     |           |          |          |          |        |               |        |
|----------------|----------|-----|-----------|----------|----------|----------|--------|---------------|--------|
| XM_001928131.1 | ABCB6    | red | 819.82323 | 120.9218 | 0.988451 | 0.001487 | 10.556 | blue          | 0.0452 |
| NM_214115.1    | LOC10029 | red | 962.08587 | 123.0578 | 0.991194 | 0.000991 | 45.688 | tan           | 0      |
| NM_001001860.1 | MAGED1   | red | 887.98496 | 126.3951 | 0.997273 | 0.000171 | 38.73  | black         | 0      |
| AY609561.1     | UTP11L   | red | 878.09122 | 126.1448 | 0.997    | 0.000197 | 14.376 | violet        | 0.4604 |
| AY609709.1     | NAA20    | red | 962.98044 | 120.3744 | 0.986786 | 0.00182  | 39.988 | lightyellow   | 99     |
| AY610308.1     | MED31    | red | 577.04404 | 87.94755 | 0.924292 | 0.02472  | 26.934 | turquoise     | 0      |
| AY609650.1     | REXO2    | red | 697.84066 | 107.557  | 0.964653 | 0.007935 | 64.99  | violet        | --     |
| NM_001039750.1 | MTX1     | red | 936.02577 | 123.191  | 0.991663 | 0.000913 | 4.418  | turquoise     | 99     |
| CB471233       |          | red | 785.58494 | 119.6048 | 0.986169 | 0.001949 | 2.59   | lightgreen    | --     |
| CF365202       |          | red | 908.49305 | 127.6441 | 0.999264 | 2.40E-05 | 5.658  | yellow        | --     |
| CF367186       |          | red | 953.52131 | 122.6398 | 0.990525 | 0.001106 | 4.854  | turquoise     | --     |
| BX670323       |          | red | 913.6448  | 124.918  | 0.994715 | 0.000461 | 7.496  | violet        | 0      |
| BX672681       |          | red | 952.16383 | 123.1204 | 0.991359 | 0.000963 | 3.364  | turquoise     | --     |
| BX674366       |          | red | 969.36198 | 120.1458 | 0.986232 | 0.001935 | 4.434  | violet        | --     |
| BX674823       |          | red | 921.20767 | 125.9042 | 0.996351 | 0.000264 | 72.126 | lightyellow   | 0.088  |
| BP166381       |          | red | 750.81837 | 115.2453 | 0.978577 | 0.003752 | 2.204  | darkturquoise | --     |
| CK458901       |          | red | 519.14329 | 81.97965 | 0.910176 | 0.031878 | 10.664 | blue          | --     |
| CK459204       |          | red | 950.81714 | 123.5404 | 0.992086 | 0.000844 | 1.746  | lightyellow   | --     |
| CK463769       |          | red | 938.19307 | 125.9801 | 0.996299 | 0.00027  | 2.452  | violet        | --     |
| BX915248       |          | red | 900.72637 | 125.3658 | 0.995534 | 0.000358 | 2.238  | yellow        | --     |
| BX920265       |          | red | 938.82636 | 125.8987 | 0.996158 | 0.000286 | 1.614  | blue          | 0.3097 |
| BX926893       |          | red | 901.54092 | 126.395  | 0.997281 | 0.00017  | 4.706  | tan           | --     |
| CN156385       |          | red | 1001.434  | 113.8719 | 0.974677 | 0.004819 | 8.632  | turquoise     | --     |
| CN159132       |          | red | 973.24303 | 117.774  | 0.98221  | 0.002841 | 21.38  | blue          | --     |
| CJ010970       |          | red | 853.99243 | 123.2111 | 0.99206  | 0.000848 | 6.866  | purple        | --     |
| CJ013003       |          | red | 775.65153 | 117.783  | 0.983059 | 0.00264  | 3.644  | darkred       | --     |
| DN100796       |          | red | 958.36023 | 120.3065 | 0.986515 | 0.001876 | 2.482  | tan           | --     |
| DN106237       |          | red | 901.00883 | 126.8797 | 0.998079 | 0.000101 | 4.036  | yellow        | --     |
| DN110962       |          | red | 1010.9087 | 112.478  | 0.972145 | 0.005557 | 7.148  | darkturquoise | 0      |
| DN113111       |          | red | 894.62975 | 127.5842 | 0.999251 | 2.46E-05 | 0.256  | violet        | --     |
| DN119094       |          | red | 887.26571 | 126.6702 | 0.997816 | 0.000122 | 2.934  | yellow        | --     |
| DN124332       |          | red | 632.07488 | 95.59982 | 0.941173 | 0.016976 | 7.014  | turquoise     | --     |
| DN124360       |          | red | 918.06453 | 127.1301 | 0.998333 | 8.17E-05 | 5.78   | lightgreen    | --     |
| DN129203       |          | red | 824.62724 | 120.8235 | 0.988326 | 0.001511 | 4.478  | yellow        | --     |
| DN130708       |          | red | 894.62975 | 127.5842 | 0.999251 | 2.46E-05 | 1.668  | paleturquoise | --     |
| AJ939015       |          | red | 926.13641 | 126.1948 | 0.996852 | 0.000212 | 4.082  | turquoise     | --     |
| BW981763       |          | red | 830.50899 | 122.707  | 0.991373 | 0.000961 | 12     | violet        | 99     |
| AJ947061       |          | red | 854.43061 | 125.4607 | 0.995883 | 0.000317 | 4.39   | lightgreen    | --     |
| AJ949618       |          | red | 910.76223 | 124.3372 | 0.99368  | 0.000602 | 4.284  | lightgreen    | --     |
| AJ950671       |          | red | 694.03523 | 108.2362 | 0.965815 | 0.007548 | 3.604  | green         | --     |
| AJ951515       |          | red | 887.63265 | 126.7277 | 0.997908 | 0.000115 | 2.998  | darkred       | --     |
| AJ952146       |          | red | 907.4193  | 126.7065 | 0.997703 | 0.000132 | 5.376  | darkred       | --     |
| AJ952617       |          | red | 898.47308 | 123.8237 | 0.993019 | 0.000699 | 1.854  | greenyellow   | --     |
| AJ955833       |          | red | 883.66829 | 126.0942 | 0.996891 | 0.000208 | 2.484  | yellow        | --     |
| AJ955864       |          | red | 896.47829 | 126.9214 | 0.998098 | 9.96E-05 | 9.07   | lightgreen    | --     |
| AJ957109       |          | red | 864.12154 | 126.3702 | 0.997392 | 0.00016  | 91.158 | yellow        | --     |
| AJ958225       |          | red | 821.89563 | 122.1914 | 0.990604 | 0.001092 | 2.718  | paleturquoise | --     |
| AJ961523       |          | red | 904.56782 | 124.8292 | 0.994564 | 0.000481 | 21.452 | yellow        | 99     |

|          |     |           |          |          |          |        |              |    |    |
|----------|-----|-----------|----------|----------|----------|--------|--------------|----|----|
| AJ962295 | red | 891.86133 | 127.1187 | 0.99853  | 6.76E-05 | 13.744 | darkred      | -- |    |
| AJ962384 | red | 893.75392 | 127.0423 | 0.998321 | 8.25E-05 | 2.43   | darkturquois | -- |    |
| AJ962774 | red | 900.90829 | 125.2543 | 0.995397 | 0.000375 | 2.304  | turquoise    | -- |    |
| AJ964015 | red | 872.48026 | 126.1095 | 0.996964 | 0.000201 | 6.71   | yellow       | -- |    |
| DV224303 | red | 948.99039 | 124.0389 | 0.992948 | 0.00071  | 2.458  | turquoise    |    | 0  |
| CV870740 | red | 962.68352 | 120.5729 | 0.987066 | 0.001762 | 7.658  | darkred      | -- |    |
| CV871765 | red | 928.58718 | 126.9062 | 0.99791  | 0.000115 | 2.192  | yellow       | -- |    |
| DY406859 | red | 945.70932 | 124.7793 | 0.994226 | 0.000526 | 2.002  | yellow       | -- |    |
| DY424276 | red | 488.76196 | 79.13985 | 0.903882 | 0.035252 | 23.314 | grey         | -- |    |
| DY426213 | red | 927.30232 | 126.2258 | 0.996845 | 0.000213 | 3.946  | lightgreen   | -- |    |
| DY428676 | red | 763.09945 | 116.2536 | 0.980286 | 0.003313 | 2.64   | turquoise    | -- |    |
| EB411464 | red | 879.02141 | 125.7344 | 0.996309 | 0.000269 | 4.202  | blue         |    | 99 |
| DB814812 | red | 923.51728 | 126.9443 | 0.997999 | 0.000107 | 5.948  | darkturquois | -- |    |
| DB812092 | red | 823.65106 | 120.0077 | 0.986841 | 0.001809 | 3.838  | lightgreen   | -- |    |
| DB807707 | red | 882.95563 | 125.9781 | 0.996704 | 0.000227 | 2.42   | yellow       | -- |    |
| DB807739 | red | 901.29773 | 125.6264 | 0.996013 | 0.000302 | 2.496  | darkred      | -- |    |
| DB786410 | red | 1003.8475 | 115.0659 | 0.976826 | 0.00422  | 6.858  | grey60       | -- |    |
| DB792839 | red | 924.30271 | 126.6343 | 0.997553 | 0.000145 | 9.862  | yellow       | -- |    |
| DB803541 | red | 609.83584 | 97.43844 | 0.944267 | 0.015661 | 7.042  | turquoise    | -- |    |
| DB800389 | red | 941.82462 | 122.9671 | 0.991167 | 0.000995 | 3.16   | paleturquois | -- |    |
| EV884726 | red | 843.63929 | 123.6743 | 0.993037 | 0.000697 | 1.952  | yellowgreen  | -- |    |
| EV889016 | red | 927.51955 | 126.2899 | 0.996876 | 0.000209 | 3.088  | darkturquois | -- |    |
| EV953169 | red | 990.78034 | 116.6299 | 0.97972  | 0.003456 | 32.846 | turquoise    | -- |    |
| EW038292 | red | 912.24855 | 125.7788 | 0.996207 | 0.00028  | 6.652  | paleturquois | -- |    |
| EW042239 | red | 941.77689 | 125.8893 | 0.996198 | 0.000281 | 4.64   | green        | -- |    |
| EW191198 | red | 681.6595  | 106.3191 | 0.962009 | 0.008838 | 12.108 | yellow       | -- |    |
| EW304442 | red | 832.05018 | 120.256  | 0.987312 | 0.001712 | 6.848  | turquoise    | -- |    |
| EW357862 | red | 894.62975 | 127.5842 | 0.999251 | 2.46E-05 | 1.156  | lightyellow  | -- |    |
| EW383709 | red | 1010.0172 | 113.2408 | 0.973513 | 0.005154 | 24.956 | turquoise    |    | 99 |
| EW444151 | red | 884.33261 | 125.7215 | 0.996291 | 0.000271 | 4.904  | black        | -- |    |
| EW554481 | red | 1007.1251 | 115.0577 | 0.976904 | 0.004199 | 20.888 | yellow       | -- |    |
| EW558531 | red | 899.16037 | 126.0221 | 0.99669  | 0.000229 | 5.712  | darkturquois | -- |    |
| EW605958 | red | 930.45374 | 126.765  | 0.997662 | 0.000136 | 2.064  | skyblue      | -- |    |
| EW607349 | red | 918.23482 | 124.5059 | 0.993996 | 0.000558 | 3.572  | darkred      | -- |    |
| EW633660 | red | 934.90685 | 125.9826 | 0.996318 | 0.000268 | 5.218  | lightgreen   | -- |    |
| EH007086 | red | 944.03277 | 123.5989 | 0.992417 | 0.000792 | 8.292  |              | -- |    |
| AW431074 | red | 929.51148 | 126.8383 | 0.997791 | 0.000125 | 4.254  | darkred      | -- |    |
| AW785426 | red | 861.14398 | 126.0898 | 0.996915 | 0.000206 | 6.406  | yellow       | -- |    |
| BF702023 | red | 871.61577 | 125.8054 | 0.996471 | 0.000252 | 2.542  | purple       | -- |    |
| BQ598728 | red | 869.17738 | 126.7372 | 0.997935 | 0.000113 | 3.178  | darkturquois | -- |    |
| BF712024 | red | 962.96654 | 122.2425 | 0.989963 | 0.001205 | 7.74   | pink         | -- |    |
| BQ597362 | red | 891.7913  | 127.4722 | 0.999067 | 3.42E-05 | 10.792 | yellow       | -- |    |
| BQ597700 | red | 932.31159 | 125.901  | 0.996196 | 0.000281 | 3.604  | yellow       | -- |    |
| BI404153 | red | 894.62975 | 127.5842 | 0.999251 | 2.46E-05 | 1.926  | darkgreen    | -- |    |
| BQ602547 | red | 937.17013 | 126.3104 | 0.996916 | 0.000206 | 5.588  | yellow       | -- |    |

Table S10-12. Module eigengene and its evolutionary rates in 15 postnatal highly LDE-specific modules (LDE\_royalblue).

| pig_Genebank   | pig_Gene | LDEModule | kTotal | kWithin | eigencorr | eigenpval  | meanExpr | LTModule      | Ka/Ks  |
|----------------|----------|-----------|--------|---------|-----------|------------|----------|---------------|--------|
| NM_001044615.1 | MED7     | royalblue | 555.24 | 61.4815 | 0.990139  | 0.00117366 | 6.016    | blue          | 0      |
| NM_001044620.1 | RABGGTB  | royalblue | 851.19 | 51.4262 | 0.947371  | 0.01437837 | 106.52   | darkorange    | 0      |
| AK230737.1     | FAM46A   | royalblue | 757.61 | 59.2258 | 0.979929  | 0.0034031  | 8.89     | turquoise     | --     |
| AK230850.1     | FEM1C    | royalblue | 592.4  | 62.462  | 0.993571  | 0.00061822 | 48.964   | darkturquoi   | --     |
| AK237827.1     | MARCKS   | royalblue | 694.85 | 56.7432 | 0.972789  | 0.00536635 | 67.862   | yellow        | --     |
| AK231783.1     | PDLIM3   | royalblue | 441.61 | 55.0558 | 0.964724  | 0.00791129 | 352.914  | blue          | 0      |
| AK231793.1     | ZC3H11A  | royalblue | 360.43 | 46.21   | 0.924798  | 0.02447465 | 8.67     | paleturquoise | 0      |
| AK232067.1     | MRPL45   | royalblue | 580.52 | 62.5318 | 0.99355   | 0.00062117 | 58.134   | skyblue       | --     |
| AK238675.1     | AHCYL2   | royalblue | 673.33 | 63.9553 | 0.998104  | 9.90E-05   | 1.61     | greenyellow   | --     |
| AK236197.1     | CHMP1B   | royalblue | 603.03 | 63.0982 | 0.995698  | 0.00033852 | 9.426    |               | --     |
| AK230525.1     | TRIP12   | royalblue | 719.28 | 63.1366 | 0.995046  | 0.00041827 | 3.64     | paleturquoise | --     |
| AK232987.1     | SLC25A46 | royalblue | 619.42 | 64.2073 | 0.999225  | 2.59E-05   | 13.542   | paleturquoise | 0      |
| AK234088.1     | ISCU     | royalblue | 618.56 | 64.3135 | 0.999558  | 1.11E-05   | 16.364   | turquoise     | 99     |
| NM_001097504.1 | HSPH1    | royalblue | 392.93 | 50.8143 | 0.945736  | 0.01504983 | 9.998    | navy          | 0      |
| NM_001097435.1 | P4HA1    | royalblue | 368.09 | 47.9616 | 0.932808  | 0.02069606 | 24.026   | red           | 0.7591 |
| NM_001105304.1 | COPS4    | royalblue | 569.14 | 63.2297 | 0.995735  | 0.00033412 | 36.054   | salmon        | 0      |
| NM_001113053.1 | IKBKG    | royalblue | 634.58 | 62.5714 | 0.994002  | 0.00055718 | 3.93     | blue          | --     |
| NM_001122994.1 | OAZ1     | royalblue | 547.45 | 62.3114 | 0.992383  | 0.00079706 | 72.584   | greenyellow   | 99     |
| NM_001123124.1 | HIF1A    | royalblue | 474.49 | 56.8853 | 0.972016  | 0.00559588 | 4.5      | darkred       | 0      |
| XM_001926625.1 | CTAGE5   | royalblue | 742    | 59.1842 | 0.980791  | 0.00318663 | 12.708   | blue          | --     |
| XM_001928709.1 | CCPG1    | royalblue | 769.08 | 59.7965 | 0.98224   | 0.00283358 | 9.4      | salmon        | 0.1642 |
| XM_001925291.1 | MAPK6    | royalblue | 429.33 | 54.4914 | 0.961604  | 0.00897923 | 8.566    | yellow        | 0      |
| XM_001928869.1 | PEX19    | royalblue | 712.48 | 61.9351 | 0.991114  | 0.00100414 | 44.664   | grey60        | 0.1768 |
| XM_001924342.1 | UBR5     | royalblue | 665.15 | 63.1219 | 0.995471  | 0.00036563 | 11.508   | salmon        | 0      |
| XM_001926975.1 | PTDSS1   | royalblue | 676.24 | 61.4331 | 0.989511  | 0.00128752 | 5.482    |               | 0.3803 |
| XM_001928879.1 | DNAJC14  | royalblue | 634.15 | 59.0368 | 0.981771  | 0.00294649 | 16.17    | skyblue       | 0      |
| XM_001928398.1 | TTRAP    | royalblue | 545.72 | 61.4945 | 0.989617  | 0.00126811 | 8.662    | paleturquoise | 99     |
| XM_001928389.1 | C6orf62  | royalblue | 744.17 | 62.0995 | 0.991277  | 0.00097676 | 152.064  | salmon        | 99     |
| XM_001928820.1 | SNRPC    | royalblue | 825.01 | 53.7224 | 0.957111  | 0.01059347 | 18.634   | navy          | 99     |
| XM_001925268.1 | FILIP1L  | royalblue | 576.85 | 63.1386 | 0.995633  | 0.00034617 | 11.228   | darkred       | --     |
| NM_213973.1    | HSP90AA1 | royalblue | 515.91 | 59.2303 | 0.981452  | 0.00302384 | 7.17     | salmon        | 0      |
| NM_213884.1    | TOP2A    | royalblue | 398.43 | 50.4191 | 0.944665  | 0.01549497 | 0.988    | brown         | 0.026  |
| AY459532       | UCHL1    | royalblue | 764.31 | 59.5693 | 0.981598  | 0.00298827 | 5.3      | turquoise     | --     |
| NM_214331.1    | HADH     | royalblue | 834.76 | 51.0571 | 0.945794  | 0.01502578 | 65.558   | pink          | 0      |
| NM_001001637.1 | PDLIM3   | royalblue | 695.87 | 63.7116 | 0.997264  | 0.00017175 | 27.854   | grey          | 0      |
| NM_001001770.1 | CYB5A    | royalblue | 633.03 | 58.6057 | 0.980181  | 0.0033393  | 56.194   | navy          | --     |
| AY609477.1     | MRPS36   | royalblue | 653.65 | 58.1423 | 0.978503  | 0.00377128 | 48.514   | red           | --     |
| AY609755.1     | TCEAL8   | royalblue | 817.73 | 57.0412 | 0.971343  | 0.00579844 | 28.266   | blue          | 0      |
| AY610051.1     | NUDC     | royalblue | 680.25 | 62.9031 | 0.994462  | 0.00049425 | 26.502   | blue          | --     |
| AY610485.1     | CHMP5    | royalblue | 468.09 | 57.0524 | 0.972379  | 0.0054876  | 5.11     | grey          | 99     |
| NM_001009576.1 | RDX      | royalblue | 498.16 | 59.5367 | 0.981957  | 0.00290144 | 10.516   | darkgreen     | 0      |
| CF181210       |          | royalblue | 393.91 | 50.2657 | 0.943765  | 0.01587235 | 228.74   | paleturquoise | --     |
| CK452729       |          | royalblue | 710.6  | 55.9919 | 0.969604  | 0.00633232 | 8.048    | turquoise     | --     |
| CK463560       |          | royalblue | 610.69 | 63.9509 | 0.998368  | 7.91E-05   | 11.612   | pink          | --     |
| BX914689       |          | royalblue | 860.46 | 50.6981 | 0.944034  | 0.01575934 | 9.102    | darkgrey      | --     |

|          |           |        |         |          |            |        |               |    |
|----------|-----------|--------|---------|----------|------------|--------|---------------|----|
| BX920496 | royalblue | 824.45 | 54.6895 | 0.961234 | 0.00910896 | 49.928 | darkgreen     | 0  |
| BX926630 | royalblue | 456.86 | 56.7753 | 0.971119 | 0.00586633 | 7.39   | greenyellow-- |    |
| CN156511 | royalblue | 766.02 | 60.1042 | 0.983223 | 0.00260195 | 4.262  | navy          | 99 |
| CN157146 | royalblue | 521.89 | 60.9494 | 0.987433 | 0.00168793 | 9.712  | grey          | -- |
| CN158127 | royalblue | 429.38 | 54.2368 | 0.960755 | 0.00927756 | 84.09  | darkorange    | -- |
| CN161882 | royalblue | 836.37 | 54.7678 | 0.961706 | 0.00894372 | 9.156  | turquoise     | -- |
| CN162353 | royalblue | 491.4  | 59.1304 | 0.980561 | 0.00324392 | 24.882 | turquoise     | -- |
| CJ011443 | royalblue | 688.98 | 63.4547 | 0.996444 | 0.00025441 | 8.51   | salmon        | -- |
| DN106500 | royalblue | 627.27 | 63.1767 | 0.995951 | 0.00030904 | 6.256  | salmon        | -- |
| DN113169 | royalblue | 766.27 | 58.8792 | 0.978516 | 0.003768   | 14.334 | green         | 0  |
| DN116324 | royalblue | 723.25 | 58.9473 | 0.979531 | 0.00350457 | 86.13  | greenyellow-- |    |
| DN118117 | royalblue | 592.54 | 59.8843 | 0.985088 | 0.00218106 | 8.178  | blue          | -- |
| BW961190 | royalblue | 774.85 | 60.5602 | 0.985313 | 0.00213191 | 5.708  | darkgreen     | -- |
| BW980850 | royalblue | 433.55 | 54.5993 | 0.96234  | 0.00872346 | 6.778  |               | 99 |
| DV226542 | royalblue | 649.01 | 62.2045 | 0.992779 | 0.00073575 | 13.446 | turquoise     | -- |
| DY410806 | royalblue | 789.64 | 56.2061 | 0.967876 | 0.00687811 | 8.28   | navy          | -- |
| DB790069 | royalblue | 565.48 | 61.3361 | 0.989714 | 0.00125039 | 9.338  | greenyellow-- |    |
| DB787693 | royalblue | 564.93 | 57.5573 | 0.977078 | 0.00415169 | 9.456  | yellow        | -- |
| DT331423 | royalblue | 481.13 | 57.1685 | 0.973305 | 0.00521475 | 6.848  | yellowgreer   | 99 |
| DT332551 | royalblue | 749.53 | 60.4963 | 0.984834 | 0.00223688 | 4.198  | violet        | -- |
| DV938382 | royalblue | 650.8  | 63.6948 | 0.997431 | 0.00015621 | 12.11  | turquoise     | -- |
| EW241468 | royalblue | 400.73 | 51.5958 | 0.949147 | 0.01366066 | 89.386 | midnightblu-- |    |
| EW425085 | royalblue | 737.98 | 57.8444 | 0.975054 | 0.00471194 | 12.292 | skyblue       | -- |
| EW464984 | royalblue | 837.6  | 54.8923 | 0.962291 | 0.00874048 | 24.256 | navy          | -- |
| EW534397 | royalblue | 743.9  | 61.6944 | 0.989393 | 0.00130923 | 6.454  | darkturquoi   | -- |
| EW620642 | royalblue | 537.67 | 58.8261 | 0.981116 | 0.00310622 | 28.368 | skyblue       | -- |
| EW646525 | royalblue | 723.6  | 61.5283 | 0.989467 | 0.00129558 | 29.382 | skyblue       | -- |
| BF711302 | royalblue | 434.27 | 53.0581 | 0.957829 | 0.01032974 | 14.328 | blue          | -- |

Table S10-13. Module eigengene and its evolutionary rates in 15 postnatal highly LDE-specific modules (LDE\_salmon).

| pig_Genebank   | pig_Gene | LDEModule | kTotal   | kWithin | eigencorr | eigenpval  | meanExpr | LTModule  | Ka/Ks |
|----------------|----------|-----------|----------|---------|-----------|------------|----------|-----------|-------|
| NM_213912.2    | TNNI1    | salmon    | 220.0595 | 71.2416 | 0.97987   | 0.0034182  | 550.324  | brown     | 0     |
| AK230715.1     | MALAT1   | salmon    | 186.0012 | 57.2749 | 0.93659   | 0.01898344 | 56.482   | lightcyan | --    |
| AK237384.1     | MAPKAP1  | salmon    | 165.4178 | 63.7533 | 0.95778   | 0.01034785 | 2.266    | pink      | 99    |
| AK240401.1     | STAT5B   | salmon    | 223.9655 | 77.4233 | 0.99829   | 8.50E-05   | 6.526    | lightcyan | --    |
| AK240417.1     | ADI1     | salmon    | 190.5261 | 66.4651 | 0.9666    | 0.00729203 | 22.01    | pink      | 99    |
| AK231006.1     | IGJ      | salmon    | 227.895  | 76.8968 | 0.99647   | 0.00025215 | 13.18    | brown     | --    |
| AK231172.1     | NDUFB7   | salmon    | 241.5812 | 73.3676 | 0.98587   | 0.00201207 | 49.874   | lightcyan | 99    |
| AK234615.1     | NSD1     | salmon    | 196.341  | 72.0289 | 0.98367   | 0.00249873 | 6.428    | lightcyan | 0     |
| AK237832.1     | LY6E     | salmon    | 210.4273 | 57.3329 | 0.93164   | 0.02123333 | 3.486    | pink      | --    |
| AK231412.1     | SS18L2   | salmon    | 162.1063 | 61.9465 | 0.95207   | 0.01250523 | 21.722   | brown     | 99    |
| AK238051.1     | TOX      | salmon    | 212.1188 | 69.1754 | 0.974     | 0.00501321 | 3.396    | magenta   | --    |
| AK235232.1     | USF2     | salmon    | 191.4208 | 67.68   | 0.97058   | 0.00603074 | 26.928   | brown     | 0     |
| AK235609.1     | LOC10012 | salmon    | 227.4921 | 77.5    | 0.9985    | 6.99E-05   | 11.912   | pink      | --    |
| AK235749.1     | MPHOSPH  | salmon    | 228.0379 | 74.954  | 0.99078   | 0.00106052 | 8.802    | brown     | 99    |
| AK238850.1     | KCTD2    | salmon    | 217.7294 | 71.5611 | 0.98134   | 0.00305145 | 31.154   |           | --    |
| AK239106.1     | CRKL     | salmon    | 219.4323 | 73.2441 | 0.98597   | 0.00199039 | 88.07    | red       | --    |
| AK236398.1     | RNASEK   | salmon    | 228.7277 | 72.9076 | 0.98419   | 0.00238145 | 20.292   | magenta   | 0     |
| AK239550.1     | COPS8    | salmon    | 209.5655 | 73.2576 | 0.98702   | 0.00177167 | 14.654   | purple    | 0     |
| AK232969.1     | CLASP1   | salmon    | 248.7166 | 67.4029 | 0.96766   | 0.00694864 | 39.42    | orange    | --    |
| AK236727.1     | C2orf64  | salmon    | 158.7119 | 55.9628 | 0.9306    | 0.0217147  | 11.184   | brown     | --    |
| AK239841.1     |          | salmon    | 226.6611 | 71.0063 | 0.97897   | 0.00364951 | 4.924    | brown     | --    |
| AK239935.1     | NUTF2    | salmon    | 205.366  | 69.3311 | 0.97502   | 0.00472095 | 40.856   | brown     | 0     |
| AK236863.1     | PPP3CA   | salmon    | 98.88597 | 39.8034 | 0.85851   | 0.06251493 | 17.924   | brown     | --    |
| AK233340.1     | MAPRE3   | salmon    | 236.7717 | 75.7693 | 0.99296   | 0.00070888 | 31.4     | blue      | --    |
| AK233423.1     | WIPI1    | salmon    | 219.5609 | 76.8745 | 0.99699   | 0.00019835 | 5.18     | pink      | 0     |
| AK233960.1     | BCL2L14  | salmon    | 220.0704 | 76.7583 | 0.99681   | 0.00021598 | 1.548    | pink      | 0.392 |
| XM_001924881.1 | CA14     | salmon    | 194.3165 | 62.9613 | 0.95461   | 0.01153001 | 50.076   | pink      | --    |
| XM_001926198.1 | PFDN5    | salmon    | 217.2981 | 70.3534 | 0.97703   | 0.00416497 | 52.78    | magenta   | 0     |
| XM_001928655.1 | CD83     | salmon    | 99.29967 | 39.0639 | 0.8543    | 0.06528081 | 7.126    | salmon    | 0     |
| XM_001925495.1 | GPHN     | salmon    | 106.5485 | 41.9281 | 0.86915   | 0.05569046 | 13.894   | sienna3   | 0     |
| XM_001926121.1 | MRPL52   | salmon    | 227.0132 | 75.8519 | 0.99416   | 0.00053517 | 30.168   | magenta   | --    |
| XM_001928656.1 | TBCC     | salmon    | 225.5724 | 77.699  | 0.99903   | 3.64E-05   | 5.78     | brown     | 0.524 |
| XM_001926988.1 | POLR1D   | salmon    | 233.5142 | 73.5302 | 0.98697   | 0.00178235 | 13.678   | pink      | 0     |
| XM_001927225.1 | COX17    | salmon    | 231.405  | 76.4857 | 0.99503   | 0.00041999 | 86.848   | magenta   | --    |
| XM_001929344.1 | CUTC     | salmon    | 240.5771 | 74.1108 | 0.9881    | 0.0015563  | 16.526   | royalblue | 0.412 |
| XM_001925381.1 | IDE      | salmon    | 165.3417 | 54.5175 | 0.92521   | 0.02427528 | 67.726   | yellow    | 0     |
| XM_001924074.1 | HSBP1    | salmon    | 240.0326 | 72.203  | 0.98189   | 0.00291742 | 68.692   | lightcyan | --    |
| NM_214039.1    | ACADM    | salmon    | 226.6346 | 64.9702 | 0.95851   | 0.01008214 | 85.154   | pink      | 0     |
| NM_214332.1    | GNB2L1   | salmon    | 226.1713 | 71.678  | 0.98086   | 0.00316884 | 355.768  | lightcyan | --    |
| AY609590.1     | TXNL1    | salmon    | 231.5141 | 70.0785 | 0.97543   | 0.00460495 | 11.61    | turquoise | 0     |
| AY609717.1     | CCT4     | salmon    | 224.502  | 70.4743 | 0.97745   | 0.00405107 | 3.866    | brown     | 0     |
| AY609883.1     | MRPL48   | salmon    | 253.1887 | 65.5111 | 0.96046   | 0.00938183 | 15.078   | orange    | 0     |
| CB288239       |          | salmon    | 216.4011 | 72.7888 | 0.985     | 0.00220126 | 5.7      | brown     | --    |
| CF792873       |          | salmon    | 239.3696 | 71.814  | 0.98147   | 0.00301969 | 21.244   | white     | --    |

|          |        |          |         |         |            |         |             |    |
|----------|--------|----------|---------|---------|------------|---------|-------------|----|
| BX666142 | salmon | 223.6251 | 72.4364 | 0.98356 | 0.00252304 | 11.56   | magenta     | 99 |
| BX666730 | salmon | 195.7066 | 72.7243 | 0.98592 | 0.00200127 | 5.518   | magenta     | -- |
| BX672343 | salmon | 166.843  | 65.0062 | 0.96216 | 0.00878575 | 8.344   | green       | -- |
| BX921221 | salmon | 230.6475 | 73.0269 | 0.98594 | 0.00199625 | 130.354 | magenta     | -- |
| BX921650 | salmon | 195.2692 | 70.0272 | 0.97776 | 0.00396752 | 18.358  | royalblue   | -- |
| CN161508 | salmon | 217.6747 | 67.449  | 0.96829 | 0.00674643 | 6.842   | lightcyan   | -- |
| AJ656502 | salmon | 205.5885 | 69.7549 | 0.97622 | 0.00438697 | 6.48    | magenta     | -- |
| CJ008036 | salmon | 162.628  | 59.408  | 0.94354 | 0.01596576 | 10.676  | brown       | -- |
| CJ009624 | salmon | 175.8258 | 53.3415 | 0.91933 | 0.02717104 | 5.83    | brown       | -- |
| CJ011598 | salmon | 235.4404 | 75.6912 | 0.99291 | 0.00071603 | 16.19   | royalblue   | -- |
| DN101483 | salmon | 211.8551 | 68.4055 | 0.97105 | 0.00588787 | 6.712   | magenta     | -- |
| DN109924 | salmon | 242.031  | 68.598  | 0.97055 | 0.0060409  | 9.064   | lightcyan   | -- |
| DN113943 | salmon | 199.1531 | 71.5818 | 0.98287 | 0.00268415 | 10.964  | green       | -- |
| DN115140 | salmon | 222.6352 | 76.7208 | 0.99654 | 0.00024404 | 45.472  | pink        | -- |
| DN120090 | salmon | 212.6175 | 76.0261 | 0.99491 | 0.00043596 | 15.48   | brown       | -- |
| DN128580 | salmon | 223.0864 | 68.9722 | 0.9735  | 0.00515921 | 62.25   | magenta     | -- |
| AJ954621 | salmon | 220.1494 | 75.087  | 0.99209 | 0.00084375 | 9.996   | turquoise   | -- |
| AJ956159 | salmon | 220.0704 | 76.7583 | 0.99681 | 0.00021598 | 1.438   | grey        | -- |
| AJ957614 | salmon | 227.302  | 70.7821 | 0.97923 | 0.0035826  | 20.71   | brown       | -- |
| AJ962054 | salmon | 231.0199 | 74.543  | 0.98991 | 0.00121392 | 4.072   | red         | -- |
| AJ962204 | salmon | 217.2313 | 72.3595 | 0.98344 | 0.00255225 | 36.902  | brown       | -- |
| AJ946071 | salmon | 192.3476 | 69.5445 | 0.97642 | 0.00433022 | 2.558   | green       | -- |
| CV877299 | salmon | 238.7673 | 74.8248 | 0.99046 | 0.0011161  | 15.874  | yellow      | -- |
| DY422640 | salmon | 239.785  | 68.1986 | 0.97024 | 0.00613541 | 30.376  | blue        | -- |
| CT863733 | salmon | 214.3111 | 75.7809 | 0.99413 | 0.0005399  | 21.34   | brown       | -- |
| DB815923 | salmon | 220.0704 | 76.7583 | 0.99681 | 0.00021598 | 1.492   |             | -- |
| DT321969 | salmon | 200.3452 | 66.9192 | 0.96756 | 0.00697987 | 46.294  | brown       | 0  |
| EW112465 | salmon | 236.0096 | 72.6731 | 0.98355 | 0.00252614 | 6.776   | brown       | -- |
| EW125499 | salmon | 230.363  | 74.9473 | 0.99143 | 0.00095188 | 7.74    | lightyellow | 0  |
| EW172087 | salmon | 246.4512 | 68.503  | 0.97086 | 0.00594554 | 12.616  | pink        | -- |
| EW195257 | salmon | 205.0976 | 71.9718 | 0.98321 | 0.00260495 | 3.638   | brown       | -- |
| EW196387 | salmon | 194.2183 | 58.7479 | 0.93888 | 0.01797357 | 4.47    | brown       | -- |
| EW212556 | salmon | 199.4484 | 65.9787 | 0.96427 | 0.00806333 | 12.008  | pink        | -- |
| EW241740 | salmon | 105.1686 | 39.3439 | 0.85744 | 0.06321375 | 49.154  | greenyellow | -- |
| EW247940 | salmon | 227.6226 | 77.8055 | 0.99927 | 2.37E-05   | 26.916  | brown       | -- |
| EW249232 | salmon | 252.2943 | 66.506  | 0.96379 | 0.00822756 | 11.49   | black       | -- |
| EW266485 | salmon | 227.5518 | 72.5204 | 0.9837  | 0.00249145 | 2.536   | magenta     | 0  |
| EW336642 | salmon | 180.1552 | 67.3753 | 0.97032 | 0.00611023 | 1.88    | magenta     | -- |
| EW365166 | salmon | 172.4542 | 66.0465 | 0.9652  | 0.0077511  | 6.01    | blue        | -- |
| EW588718 | salmon | 188.7809 | 69.5405 | 0.97599 | 0.00445033 | 8.478   | violet      | 0  |
| FL593096 | salmon | 222.5842 | 74.5085 | 0.99067 | 0.0010803  | 138.208 | brown       | -- |
| BF192577 | salmon | 221.6329 | 72.7901 | 0.98467 | 0.00227389 | 2.974   | magenta     | -- |
| BF712213 | salmon | 219.1419 | 75.5324 | 0.993   | 0.00070271 | 1.786   | darkgrey    | -- |
| BF711853 | salmon | 243.0613 | 71.8524 | 0.98096 | 0.00314396 | 4.4     | royalblue   | -- |
| BQ599187 | salmon | 215.8463 | 76.2957 | 0.99551 | 0.00036142 | 28.204  | lightcyan   | -- |
| BI181083 | salmon | 239.5978 | 71.3984 | 0.9791  | 0.00361545 | 22.114  | brown       | 99 |

Table S10-14. Module eigengene and its evolutionary rates in 15 postnatal highly LDE-specific modules (LDE\_skyblue).

| pig_Genebank   | pig_Gene | LDE Module | kTotal  | kWithin   | eigencorr | eigenpval | meanExpr | LTModule     | Ka/Ks |
|----------------|----------|------------|---------|-----------|-----------|-----------|----------|--------------|-------|
| AK240428.1     | JUN      | skyblue    | 467.24  | 44.12717  | 0.997942  | 0.00011   | 4.698    | yellow       | 99    |
| AK234533.1     | UBXN4    | skyblue    | 569.379 | 39.61232  | 0.973197  | 0.00525   | 64.332   | skyblue      | 0     |
| AK231233.1     | USP24    | skyblue    | 566.692 | 43.084276 | 0.991294  | 0.00097   | 28.652   | salmon       | 0     |
| AK231450.1     | N4BP1    | skyblue    | 479.335 | 44.382447 | 0.999099  | 3.25E-05  | 7.714    | salmon       | 0.429 |
| AK235378.1     | C16orf5  | skyblue    | 574.159 | 42.37714  | 0.987439  | 0.00169   | 14.834   | green        | --    |
| AK235438.1     | CAPRN1   | skyblue    | 627.884 | 39.929977 | 0.973089  | 0.00528   | 2.896    | darkred      | 0     |
| AK232237.1     | SPARC    | skyblue    | 403.372 | 42.044621 | 0.987174  | 0.00174   | 16.962   | yellow       | --    |
| AK235771.1     | LRRC57   | skyblue    | 615.186 | 40.65116  | 0.977494  | 0.00404   | 23.278   | royalblue    | 99    |
| AK235963.1     | TNFRSF1B | skyblue    | 505.948 | 43.192405 | 0.993232  | 0.00067   | 3.788    | green        | --    |
| AK238834.1     | PARP8    | skyblue    | 290.191 | 31.813978 | 0.924094  | 0.02482   | 2.6      | yellow       | 0     |
| AK238998.1     | ASNA1    | skyblue    | 357.002 | 38.807828 | 0.969161  | 0.00647   | 56.894   | purple       | 99    |
| AK230486.1     |          | skyblue    | 547.344 | 43.574733 | 0.994113  | 0.00054   | 1821.55  | midnightblue | --    |
| AK230621.1     | DCAF10   | skyblue    | 343.636 | 36.677224 | 0.957704  | 0.01038   | 26.226   | turquoise    | --    |
| AK232881.1     | ACAD8    | skyblue    | 654.651 | 37.149394 | 0.956465  | 0.01083   | 26.306   | navy         | 0.104 |
| AK239745.1     | C1orf174 | skyblue    | 271.661 | 29.989971 | 0.910731  | 0.03159   | 17.766   | navy         | 99    |
| AK239944.1     | CMPK1    | skyblue    | 485.426 | 43.912914 | 0.996912  | 0.00021   | 17.25    | green        | 0     |
| AK233368.1     | NAP1L1   | skyblue    | 602.535 | 39.028518 | 0.969296  | 0.00643   | 21.496   | white        | 0     |
| NM_001077227.1 | UCHL3    | skyblue    | 508.977 | 44.024736 | 0.997201  | 0.00018   | 8.3      | purple       | 0.336 |
| NM_001123194.1 | SERPING1 | skyblue    | 700.157 | 34.426755 | 0.938736  | 0.01803   | 6.224    | navy         | 0.041 |
| XM_001929120.1 | GMPR     | skyblue    | 512.173 | 42.76928  | 0.991207  | 0.00099   | 63.398   | greenyellow  | 0     |
| XM_001924308.1 | ZFP36L1  | skyblue    | 495.231 | 42.948798 | 0.992296  | 0.00081   | 131.502  | navy         | 0     |
| XM_001924784.1 | HECTD1   | skyblue    | 638.257 | 37.797957 | 0.960863  | 0.00924   | 70.276   | turquoise    | --    |
| XM_001928342.1 | EIF3A    | skyblue    | 651.759 | 38.349    | 0.963688  | 0.00826   | 126.964  | white        | 0     |
| XM_001925803.1 | TTN      | skyblue    | 360.954 | 37.847906 | 0.965231  | 0.00774   | 3064.368 | green        | --    |
| NM_001130733.1 | ADSL     | skyblue    | 563.346 | 43.154678 | 0.991773  | 0.00089   | 74.936   | salmon       | 0.135 |
| NM_001142669.1 | TEAD1    | skyblue    | 497.605 | 44.332118 | 0.998688  | 5.70E-05  | 6.856    | yellowgreen  | 0     |
| NM_214144.1    | PRDX5    | skyblue    | 333.508 | 35.804342 | 0.951567  | 0.0127    | 22.21    | brown        | 0     |
| AY610454.1     | ATP5G2   | skyblue    | 403.473 | 42.095053 | 0.987389  | 0.0017    | 20.708   | turquoise    | --    |
| CF787473       |          | skyblue    | 651.119 | 38.392302 | 0.963945  | 0.00817   | 8.016    | turquoise    | --    |
| BX665551       |          | skyblue    | 491.964 | 44.562338 | 0.999844  | 2.34E-06  | 44.822   | green        | --    |
| BX917182       |          | skyblue    | 551.99  | 42.742191 | 0.9899    | 0.00122   | 12.306   | red          | --    |
| BX918252       |          | skyblue    | 616.667 | 40.130908 | 0.974627  | 0.00483   | 6.006    | darkred      | --    |
| CN161493       |          | skyblue    | 430.19  | 43.376659 | 0.994089  | 0.00055   | 235.046  | yellow       | --    |
| CN162120       |          | skyblue    | 442.6   | 42.756601 | 0.991446  | 0.00095   | 13.186   | tan          | --    |
| CJ010759       |          | skyblue    | 494.154 | 44.19388  | 0.998156  | 9.50E-05  | 10.974   | midnightblue | --    |
| CJ038862       |          | skyblue    | 520.756 | 44.099292 | 0.997327  | 0.00017   | 13.52    | brown        | --    |
| DN106398       |          | skyblue    | 472.027 | 41.130205 | 0.983556  | 0.00253   | 10.712   | grey         | --    |
| DN107605       |          | skyblue    | 570.612 | 42.835213 | 0.989879  | 0.00122   | 22.116   |              | 0     |
| DN107719       |          | skyblue    | 544.196 | 43.3845   | 0.993292  | 0.00066   | 55.488   | yellow       | --    |
| DN107929       |          | skyblue    | 378.943 | 39.067438 | 0.971762  | 0.00567   | 8.832    | purple       | --    |
| DN113717       |          | skyblue    | 631.772 | 39.698691 | 0.971806  | 0.00566   | 224.852  | purple       | --    |
| AJ956497       |          | skyblue    | 421.359 | 42.616749 | 0.990397  | 0.00113   | 6.698    | green        | --    |
| AJ964366       |          | skyblue    | 329.397 | 34.818877 | 0.947886  | 0.01417   | 5.014    | magenta      | --    |
| AJ945367       |          | skyblue    | 644.281 | 38.782611 | 0.966454  | 0.00734   | 4.712    | yellow       | --    |

|          |         |         |           |          |         |         |             |    |
|----------|---------|---------|-----------|----------|---------|---------|-------------|----|
| DV225345 | skyblue | 468.126 | 43.575738 | 0.995409 | 0.00037 | 10.512  | turquoise   | 99 |
| DY426215 | skyblue | 314.099 | 34.854221 | 0.94446  | 0.01558 | 11.978  | darkred     | -- |
| DY437498 | skyblue | 407.308 | 40.527168 | 0.980282 | 0.00331 | 8.862   | greenyellow | 99 |
| DY437561 | skyblue | 262.947 | 28.91035  | 0.902661 | 0.03592 | 82.858  | lightcyan   | -- |
| EV935557 | skyblue | 411.941 | 41.319168 | 0.983884 | 0.00245 | 5.552   | greenyellow | -- |
| EW239354 | skyblue | 439.063 | 43.250376 | 0.993753 | 0.00059 | 9.484   | brown       | -- |
| EW623854 | skyblue | 406.566 | 41.64748  | 0.985511 | 0.00209 | 163.098 | grey        | -- |

---



Table S10-15. Module eigengene and its evolutionary rates in 15 postnatal highly LDE-specific modules (LDE\_yellow).

| pig_Genebank   | pig_Gene  | LDE    |                 | eigencorr | eigenpval | meanExpr  | LTModule    | Ka/Ks |
|----------------|-----------|--------|-----------------|-----------|-----------|-----------|-------------|-------|
|                |           | Module | kTotal kWithin  |           |           |           |             |       |
| NM_001044527.1 | ENO3      | yellow | 150.35 69.68024 | 0.8490825 | 0.0687637 | 14058.178 | green       | 0     |
| NM_001044535.1 | PSMD4     | yellow | 272.64 123.2125 | 0.9791383 | 0.0036057 | 56.038    | turquoise   | 0     |
| AK230718.1     | SON       | yellow | 299.73 126.3428 | 0.9830424 | 0.0026441 | 2.622     | turquoise   | --    |
| AK237425.1     | AOC3      | yellow | 239.19 113.081  | 0.9602501 | 0.0094565 | 23.528    | red         | --    |
| AK237433.1     | TBC1D10B  | yellow | 310.27 127.8898 | 0.9879732 | 0.0015804 | 46.362    | turquoise   | 0     |
| AK230890.1     | UBA3      | yellow | 217.75 81.86102 | 0.8835561 | 0.046857  | 43.832    | red         | --    |
| AK234448.1     | ACTR10    | yellow | 220.22 73.66665 | 0.8548278 | 0.0649334 | 22.672    | tan         | 0     |
| AK234624.1     | TAP1      | yellow | 224.47 76.85822 | 0.8769221 | 0.050865  | 18.496    | brown       | --    |
| AK234832.1     | BTBD3     | yellow | 292.23 124.2921 | 0.9790574 | 0.0036267 | 14.936    | turquoise   | --    |
| AK231509.1     | FJX1      | yellow | 255.58 95.95749 | 0.9164941 | 0.0286018 | 2.134     | lightyellow | 0.178 |
| AK234955.1     | MAFG      | yellow | 313.32 129.048  | 0.9889041 | 0.0014007 | 18.378    | turquoise   | --    |
| AK231548.1     | PIGC      | yellow | 173.39 80.01532 | 0.8817118 | 0.0479608 | 145.702   | greenyellow | 0     |
| AK231759.1     | MAZ       | yellow | 198.27 90.30882 | 0.907552  | 0.0332709 | 57.926    | green       | 99    |
| AK231765.1     | CAPN3     | yellow | 149.45 62.80127 | 0.8230331 | 0.0869549 | 33.966    | green       | --    |
| AK231943.1     | SERINC2   | yellow | 278.98 130.6087 | 0.9927755 | 0.0007363 | 22.928    | darkgrey    | 0     |
| AK235345.1     | MLLT3     | yellow | 253.41 114.9926 | 0.9639104 | 0.0081854 | 8.196     | grey60      | 0     |
| AK231905.1     | DNAJC5    | yellow | 279.91 123.3362 | 0.9780571 | 0.003889  | 49.066    | blue        | --    |
| AK235380.1     | STAT5B    | yellow | 303.88 121.1517 | 0.9738551 | 0.0050548 | 15.048    | purple      | --    |
| AK238495.1     | ZNF219    | yellow | 250.24 113.6208 | 0.9617572 | 0.0089259 | 14.206    | lightcyan   | --    |
| AK232277.1     | HSPB2     | yellow | 277.63 110.4317 | 0.9499479 | 0.0133407 | 81.342    | turquoise   | 0     |
| AK232326.1     | WWP2      | yellow | 190.99 78.15219 | 0.8746578 | 0.0522566 | 3.706     | turquoise   | --    |
| AK235638.1     | HSPA1A    | yellow | 279.88 130.299  | 0.9919463 | 0.0008666 | 160.858   | turquoise   | --    |
| AK235644.1     | RAB5C     | yellow | 298.39 132.5922 | 0.9960409 | 0.0002989 | 53.794    | turquoise   | 99    |
| AK232367.1     | EIF3I     | yellow | 295.08 129.9432 | 0.9913982 | 0.0009564 | 20.528    | turquoise   | 0     |
| AK232423.1     | UBE2D4    | yellow | 120.95 52.77209 | 0.7879894 | 0.1133842 | 157.048   | green       | --    |
| AK232491.1     | PNPO      | yellow | 271.14 117.261  | 0.9664834 | 0.0073287 | 21.062    | greenyellow | 99    |
| AK238776.1     | TGIF1     | yellow | 272.61 85.27287 | 0.8896631 | 0.0432607 | 5.222     | turquoise   | 99    |
| AK232614.1     | MAP7D1    | yellow | 281.53 122.8075 | 0.9769932 | 0.0041746 | 49.676    | turquoise   | 99    |
| AK236127.1     | PABPC4    | yellow | 212.61 100.8208 | 0.9334858 | 0.0203856 | 175.8     | blue        | 99    |
| AK236301.1     | G3BP1     | yellow | 260.6 104.9462  | 0.9395119 | 0.0176953 | 20.162    | turquoise   | --    |
| AK236404.1     | HNRNPUL1  | yellow | 272.43 92.41776 | 0.9079084 | 0.0330805 | 29.664    | sienna3     | 99    |
| AK236564.1     | SPNS1     | yellow | 265.89 120.1303 | 0.9732843 | 0.0052208 | 15.784    | tan         | 0     |
| AK239436.1     | MYOM1     | yellow | 198.09 89.36607 | 0.9033985 | 0.0355152 | 654.514   | brown       | 0     |
| AK239459.1     | LOC390834 | yellow | 223.34 79.13654 | 0.8810003 | 0.0483888 | 302.608   | brown       | --    |
| AK239526.1     | TNFRSF13E | yellow | 274.34 120.2084 | 0.9727702 | 0.0053718 | 16.896    | turquoise   | --    |
| AK239597.1     | DDB2      | yellow | 295.48 128.4236 | 0.9892914 | 0.0013281 | 15.094    | navy        | 0     |
| AK239729.1     | TMEM100   | yellow | 195.35 75.3778  | 0.8656799 | 0.057889  | 11.824    | orange      | 0     |
| AK236609.1     | CCDC85B   | yellow | 281.28 123.8628 | 0.9788894 | 0.0036703 | 12.642    | turquoise   | --    |
| AK233229.1     | MRPS2     | yellow | 242.02 102.4779 | 0.9346872 | 0.0198395 | 4.58      | turquoise   | 99    |
| AK239956.1     | UTP14A    | yellow | 161.04 61.73221 | 0.8276705 | 0.0836211 | 31.54     | turquoise   | 99    |
| AK240023.1     | TOP1      | yellow | 293.71 133.87   | 0.9977322 | 0.0001296 | 8.846     | turquoise   | --    |
| AK240042.1     | PDE6D     | yellow | 291.14 130.9967 | 0.9931899 | 0.0006739 | 6.692     | navy        | 0     |
| AK233383.1     | CDC42BPA  | yellow | 303.26 133.4376 | 0.9966065 | 0.0002372 | 9.506     | turquoise   | --    |
| AK233420.1     | SCAND1    | yellow | 292.86 120.8428 | 0.9714359 | 0.0057703 | 73.478    | turquoise   | 99    |

|                |          |        |        |          |           |           |          |               |       |
|----------------|----------|--------|--------|----------|-----------|-----------|----------|---------------|-------|
| AK233465.1     | NAA38    | yellow | 306.85 | 131.0274 | 0.9916412 | 0.0009162 | 8.352    | blue          | --    |
| AK240338.1     | TMEM126B | yellow | 256.71 | 115.6948 | 0.9639561 | 0.00817   | 8.99     | turquoise     | 0.165 |
| AK233778.1     | GTF2A2   | yellow | 275.59 | 109.2782 | 0.9489619 | 0.0137348 | 36.06    | turquoise     | 99    |
| NM_001097419.1 | PPPDE1   | yellow | 259.14 | 102.7603 | 0.9342677 | 0.0200296 | 46.69    |               | 0     |
| NM_001097486.1 | ATPIF1   | yellow | 311.62 | 125.9452 | 0.9824534 | 0.0027828 | 103.824  | red           | 99    |
| NM_001123203.1 | PMEPA1   | yellow | 309.87 | 121.3457 | 0.9732352 | 0.0052351 | 10.174   | grey60        | --    |
| XM_001926129.1 | PTGS1    | yellow | 310.75 | 130.6676 | 0.9920962 | 0.0008425 | 5.458    | turquoise     | 0.132 |
| XM_001925915.1 | SMARCA2  | yellow | 244.95 | 117.2256 | 0.9679641 | 0.00685   | 54.804   | pink          | 0.2   |
| XM_001929399.1 | GCHFR    | yellow | 256.94 | 122.0937 | 0.9767024 | 0.0042538 | 22.824   | brown         | 99    |
| XM_001927620.1 | CYHR1    | yellow | 227.73 | 84.07104 | 0.8924751 | 0.0416357 | 26.878   | pink          | 99    |
| XM_001929384.1 | CCBL2    | yellow | 258.41 | 121.3386 | 0.9762051 | 0.0043904 | 87.38    | purple        | 99    |
| XM_001928548.1 | ARHGDIB  | yellow | 274.18 | 129.1361 | 0.9901892 | 0.0011648 | 8.506    | turquoise     | --    |
| XM_001925621.1 | COPS7A   | yellow | 205.16 | 90.93051 | 0.9087516 | 0.0326314 | 86.31    | royalblue     | 99    |
| XM_001926748.1 |          | yellow | 292.71 | 130.6354 | 0.9924175 | 0.0007917 | 7.518    | turquoise     | --    |
| XM_001926160.1 | ERH      | yellow | 310.66 | 127.2738 | 0.9854801 | 0.0020957 | 22.55    | turquoise     | 99    |
| XM_001924445.1 | PSMB5    | yellow | 291.29 | 132.1887 | 0.9946441 | 0.0004702 | 178.25   | darkmagenta   | 99    |
| XM_001929172.1 | HMG20A   | yellow | 238.67 | 73.0493  | 0.8540116 | 0.0654734 | 36.354   | blue          | 0     |
| XM_001927655.1 | PFDN6    | yellow | 310.1  | 124.6682 | 0.9795862 | 0.0034905 | 5.028    | purple        | --    |
| XM_001928486.1 | FXR1     | yellow | 147.5  | 66.37493 | 0.8407036 | 0.0744703 | 331.414  | brown         | 0     |
| XM_001924973.1 | FBXW4    | yellow | 241.48 | 105.4772 | 0.9431859 | 0.0161169 | 66.414   | green         | 0.166 |
| XM_001928329.1 | C1orf57  | yellow | 272.2  | 127.4598 | 0.9865489 | 0.0018689 | 46.458   | pink          | --    |
| XM_001927802.1 | ANXA7    | yellow | 227.07 | 105.9774 | 0.9426674 | 0.0163367 | 184.598  | skyblue       | 99    |
| XM_001928616.1 | NOC4L    | yellow | 282.9  | 113.4736 | 0.9564608 | 0.0108342 | 5.662    | turquoise     | 0.133 |
| NM_001135960.1 | ABRA     | yellow | 236.81 | 110.0199 | 0.9515798 | 0.0126968 | 213.644  | turquoise     | 0.08  |
| NM_213954.1    | ACO2     | yellow | 287.71 | 117.3438 | 0.9661605 | 0.0074345 | 372.544  | royalblue     | 0     |
| NM_213983.1    | PSMC5    | yellow | 251.2  | 91.48086 | 0.90838   | 0.0328291 | 234.298  | blue          | 0     |
| NM_214157.1    | SREBF1   | yellow | 268.02 | 125.6642 | 0.983462  | 0.0025467 | 10.046   | darkgreen     | --    |
| NM_214249.1    | ATP1A1   | yellow | 176.65 | 82.23433 | 0.8844176 | 0.0463441 | 18.002   | salmon        | 0     |
| NM_214342.1    | OXSRI    | yellow | 310.62 | 130.038  | 0.9906292 | 0.0010874 | 26.838   | orange        | 0     |
| NM_214381.1    | CAMK2D   | yellow | 139.41 | 56.56788 | 0.800619  | 0.1036155 | 52.706   | navy          | 99    |
| AY609689.1     | FH       | yellow | 248.68 | 99.34133 | 0.9278739 | 0.0229995 | 120.21   | orange        | 0.136 |
| AY610172.1     | CAPZA2   | yellow | 228.87 | 103.8455 | 0.9387711 | 0.0180193 | 38.57    | midnightblue  | --    |
| NM_214042.1    | NTAN1    | yellow | 262.98 | 118.6505 | 0.9702777 | 0.0061237 | 58.81    | turquoise     | --    |
| NM_001008688.1 | CA3      | yellow | 165.31 | 72.3418  | 0.8549065 | 0.0648814 | 5923.556 | green         | 0     |
| NM_001037151.1 | TPI1     | yellow | 239.57 | 112.6318 | 0.9579238 | 0.0102951 | 12.162   | greenyellow   | 0     |
| CB469596       |          | yellow | 292.49 | 122.0024 | 0.9744985 | 0.0048698 | 2.872    | lightcyan     | --    |
| CF179281       |          | yellow | 250.07 | 116.1927 | 0.9645336 | 0.0079751 | 21.078   | sienna3       | --    |
| CF365654       |          | yellow | 306.85 | 127.8551 | 0.9880101 | 0.0015732 | 28.05    | yellowgreen   | --    |
| CF367795       |          | yellow | 278.44 | 125.2798 | 0.9822155 | 0.0028394 | 15.526   | purple        | --    |
| BX666997       |          | yellow | 256.76 | 119.9654 | 0.9735468 | 0.0051442 | 349.08   | green         | --    |
| BX667232       |          | yellow | 262.01 | 79.056   | 0.8812521 | 0.0482371 | 5.872    | brown         | --    |
| BX669608       |          | yellow | 299.26 | 127.0128 | 0.9844446 | 0.0023235 | 8.298    | brown         | --    |
| BX670880       |          | yellow | 238.41 | 109.7413 | 0.9508722 | 0.0129747 | 416.9    | turquoise     | --    |
| BX671641       |          | yellow | 300.42 | 130.0715 | 0.9906018 | 0.0010922 | 4.114    | salmon        | 0     |
| BX672877       |          | yellow | 269.1  | 117.991  | 0.9685933 | 0.0066498 | 18.75    | turquoise     | --    |
| BX672955       |          | yellow | 315.56 | 122.475  | 0.9776034 | 0.00401   | 163.926  | purple        | --    |
| BX673135       |          | yellow | 299.96 | 134.8919 | 0.9994749 | 1.44E-05  | 36.39    | turquoise     | 0     |
| BX673343       |          | yellow | 301.67 | 131.5153 | 0.9942907 | 0.0005174 | 40.37    | paleturquoise | --    |

|          |          |        |          |           |           |           |               |         |    |
|----------|----------|--------|----------|-----------|-----------|-----------|---------------|---------|----|
| BX675885 | yellow   | 312.92 | 127.9113 | 0.9876647 | 0.0016415 | 19.942    | blue          | --      |    |
| CK451444 | yellow   | 243.8  | 108.5181 | 0.9492408 | 0.013623  | 8.734     | turquoise     | --      |    |
| CK453505 | yellow   | 181.06 | 84.91013 | 0.8951572 | 0.0401043 | 44.296    | turquoise     | --      |    |
| CK454638 | yellow   | 231.13 | 106.6568 | 0.9464514 | 0.0147549 | 7.118     | red           | --      |    |
| CK458661 | yellow   | 300.3  | 134.6069 | 0.9988473 | 4.70E-05  | 44.074    | turquoise     | --      |    |
| CK459914 | yellow   | 304.6  | 130.6498 | 0.9910994 | 0.0010067 | 6.404     | turquoise     | --      |    |
| CK461249 | yellow   | 261.94 | 124.6444 | 0.9820805 | 0.0028718 | 3.42      | salmon        | --      |    |
| CK463421 | yellow   | 293.2  | 133.2237 | 0.9967039 | 0.000227  | 19.078    | turquoise     | --      |    |
| CK467233 | yellow   | 208.76 | 86.25977 | 0.9001293 | 0.0373143 | 12.398    | green         | --      |    |
| CK467821 | yellow   | 283.44 | 128.1575 | 0.9880101 | 0.0015732 | 98.382    | green         | --      |    |
| BX916347 | yellow   | 313.54 | 122.6011 | 0.9783581 | 0.0038095 | 10.952    | turquoise     | --      |    |
| BX921055 | yellow   | 294.55 | 134.6428 | 0.9993096 | 2.18E-05  | 24.054    | royalblue     | --      |    |
| BX921809 | yellow   | 285.72 | 121.4485 | 0.9772958 | 0.0040927 | 64.642    | green         | --      |    |
| BX922353 | yellow   | 135.31 | 61.325   | 0.8218586 | 0.0878055 | 17.572    | grey          | --      |    |
| BX926193 | yellow   | 251.06 | 101.6859 | 0.9326362 | 0.0207748 | 29.664    | turquoise     | 99      |    |
| BX926422 | yellow   | 289.78 | 132.6136 | 0.9958964 | 0.0003154 | 2.772     | yellow        | --      |    |
| CN153435 | yellow   | 300.6  | 124.5212 | 0.9800091 | 0.0033828 | 7.506     | green         | --      |    |
| CN154075 | yellow   | 181.29 | 57.53216 | 0.8137062 | 0.0937794 | 12.772    | darkturquoise | --      |    |
| CN158750 | yellow   | 285.79 | 112.1137 | 0.9530605 | 0.0121216 | 5.86      | turquoise     | --      |    |
| CO946908 | yellow   | 263.82 | 115.8307 | 0.9641506 | 0.0081042 | 7.47      | turquoise     | --      |    |
| DN100886 | yellow   | 181.31 | 83.85524 | 0.8881884 | 0.0441207 | 35.788    | blue          | --      |    |
| DN100939 | yellow   | 294.25 | 125.8159 | 0.9817167 | 0.0029595 | 34.43     | skyblue       | --      |    |
| DN104085 | yellow   | 309.56 | 119.8472 | 0.9712165 | 0.0058367 | 11.616    | black         | 99      |    |
| DN104365 | yellow   | 310.32 | 125.3929 | 0.9818273 | 0.0029328 | 19.37     | turquoise     | --      |    |
| DN108916 | yellow   | 290.68 | 133.3357 | 0.9969047 | 0.0002066 | 6.828     | yellow        | --      |    |
| DN111262 | yellow   | 305.49 | 124.1805 | 0.9815683 | 0.0029955 | 191.884   | purple        | --      |    |
| DN112619 | yellow   | 308.04 | 123.3268 | 0.976765  | 0.0042367 | 17.738    | sienna3       | --      |    |
| DN116744 | yellow   | 232.5  | 104.7066 | 0.9419965 | 0.0166227 | 5.142     | royalblue     | --      |    |
| DN117127 | yellow   | 225.96 | 67.68163 | 0.8347634 | 0.0786005 | 84.39     | navy          | --      |    |
| DN120072 | yellow   | 165.29 | 58.51015 | 0.8125876 | 0.0946083 | 37.442    | blue          | 99      |    |
| DN124256 | yellow   | 226.62 | 69.97051 | 0.8425312 | 0.0732136 | 59.888    | turquoise     | --      |    |
| BW960627 | yellow   | 285.13 | 132.1649 | 0.995312  | 0.000385  | 15.582    | orange        | --      |    |
| BW979917 | yellow   | 244.98 | 100.1102 | 0.9281143 | 0.0228854 | 16.132    | grey60        | --      |    |
| AJ955027 | yellow   | 309.58 | 129.0931 | 0.9881533 | 0.0015451 | 18.932    | midnightblue  | 99      |    |
| AJ955039 | yellow   | 218.66 | 99.70795 | 0.9324243 | 0.0208722 | 14.254    | brown         | --      |    |
| DV225793 | yellow   | 243.04 | 105.4319 | 0.9416066 | 0.0167895 | 71.006    | violet        | --      |    |
| DY405801 | yellow   | 244.68 | 114.894  | 0.9633704 | 0.0083692 | 15.048    | turquoise     | --      |    |
| DY423291 | yellow   | 214    | 97.49306 | 0.9230685 | 0.0253171 | 19.1      | yellow        | --      |    |
| EB418537 | yellow   | 312.05 | 124.1557 | 0.9813429 | 0.0030506 | 11.194    | brown         | --      |    |
| DB786327 | yellow   | 227.4  | 105.4613 | 0.9448779 | 0.0154063 | 11.536    | brown         | 99      |    |
| AK230483 | HLA-DQA1 | yellow | 278.55   | 116.6748  | 0.9672089 | 0.0070928 | 8.408         | magenta | -- |
| ES444893 | yellow   | 303.03 | 117.1927 | 0.9662687 | 0.007399  | 9.016     | salmon        | --      |    |
| EV872189 | yellow   | 216.36 | 100.7294 | 0.9317023 | 0.0212052 | 79.704    | midnightblue  | --      |    |
| EV873204 | yellow   | 298.22 | 122.6214 | 0.9783122 | 0.0038216 | 1144.25   | darkorange    | --      |    |
| EV889890 | yellow   | 284.97 | 127.324  | 0.9867332 | 0.0018307 | 21.582    | grey60        | --      |    |
| EV890051 | yellow   | 307.26 | 122.7174 | 0.9760711 | 0.0044275 | 289.064   | orange        | 99      |    |
| EV893036 | yellow   | 259.9  | 121.7594 | 0.9768124 | 0.0042238 | 10.302    | green         | --      |    |
| EV928650 | yellow   | 228.95 | 84.33437 | 0.8903253 | 0.0428763 | 9.948     | tan           | --      |    |

|          |        |        |          |           |           |         |               |    |    |
|----------|--------|--------|----------|-----------|-----------|---------|---------------|----|----|
| EV986176 | yellow | 301.2  | 132.4954 | 0.9948198 | 0.0004472 | 24.334  | midnightblue  | -- |    |
| EW074931 | yellow | 165.52 | 63.78309 | 0.8307772 | 0.0814103 | 64.968  | green         | -- |    |
| EW079375 | yellow | 315.45 | 123.6314 | 0.979667  | 0.0034698 | 3.702   | pink          | -- |    |
| EW079644 | yellow | 206.62 | 91.88704 | 0.9141338 | 0.0298121 | 4.198   | brown         | -- |    |
| EW093641 | yellow | 267.7  | 116.739  | 0.9678708 | 0.0068799 | 13.466  | blue          | -- | 99 |
| EW182201 | yellow | 269.3  | 118.3241 | 0.9685539 | 0.0066623 | 4.82    | green         | -- |    |
| EW189902 | yellow | 296.21 | 134.2089 | 0.9982238 | 8.98E-05  | 8.524   | blue          | -- |    |
| EW205532 | yellow | 307.91 | 124.5599 | 0.9822976 | 0.0028199 | 61.324  | blue          | -- |    |
| EW237006 | yellow | 243.3  | 112.508  | 0.9591166 | 0.0098622 | 10.412  | green         | -- |    |
| EW238443 | yellow | 230.18 | 103.0099 | 0.9373776 | 0.018634  | 71.61   | green         | -- |    |
| EW240620 | yellow | 309.98 | 128.539  | 0.9890708 | 0.0013693 | 12.748  | green         | -- |    |
| EW246316 | yellow | 179.21 | 75.28159 | 0.8647758 | 0.0584661 | 72.332  | blue          | -- |    |
| EW253506 | yellow | 299.72 | 127.3242 | 0.9852628 | 0.0021429 | 16.392  | green         | -- |    |
| EW254039 | yellow | 294.15 | 115.9939 | 0.9641214 | 0.008114  | 246.866 | turquoise     | -- |    |
| EW264653 | yellow | 240.41 | 107.3145 | 0.9480987 | 0.0140829 | 19.336  | turquoise     | -- |    |
| EW269125 | yellow | 306.59 | 128.7591 | 0.9890841 | 0.0013668 | 14.922  | turquoise     | -- |    |
| EW276793 | yellow | 313.96 | 128.7243 | 0.9884068 | 0.0014958 | 5.882   | turquoise     | -- |    |
| EW278920 | yellow | 252.68 | 117.3597 | 0.9675591 | 0.0069799 | 19.888  | paleturquoise | -- |    |
| EW367525 | yellow | 242.26 | 111.2104 | 0.956681  | 0.0107525 | 203.338 | royalblue     | -- |    |
| EW408987 | yellow | 289.51 | 133.0718 | 0.9965631 | 0.0002417 | 2.122   | darkorange    | -- |    |
| EW429561 | yellow | 307.5  | 130.7392 | 0.9921974 | 0.0008264 | 15.368  | blue          | -- |    |
| EW524740 | yellow | 273.4  | 105.5872 | 0.9390797 | 0.0178841 | 2.674   | navy          | -- |    |
| EW528694 | yellow | 269.89 | 103.8707 | 0.9361291 | 0.0191904 | 78.944  | turquoise     | -- |    |
| EW565938 | yellow | 284.46 | 130.0728 | 0.9914998 | 0.0009396 | 120.698 | greenyellow   | -- |    |
| EW568518 | yellow | 268.66 | 123.1864 | 0.9794117 | 0.0035352 | 5.49    | lightcyan     | -- |    |
| EW573852 | yellow | 276.27 | 128.0981 | 0.9879604 | 0.0015829 | 17.43   | purple        | -- |    |
| EW590550 | yellow | 313.09 | 129.5389 | 0.9902171 | 0.0011598 | 102.718 | turquoise     | -- |    |
| EW641588 | yellow | 154.06 | 60.85641 | 0.8211611 | 0.0883119 | 20.542  | royalblue     | -- |    |
| EW671244 | yellow | 236    | 84.44784 | 0.886904  | 0.0448742 | 15.364  | red           | -- |    |
| BF441130 | yellow | 275.57 | 125.6439 | 0.9833469 | 0.0025733 | 3.448   | brown         | -- |    |
| BQ598826 | yellow | 306.09 | 128.5338 | 0.9883906 | 0.001499  | 31.642  | green         | -- |    |
| BM190355 | yellow | 210.3  | 97.10964 | 0.9220485 | 0.0258182 | 93.966  | turquoise     | -- | 0  |

Table S11-1. Module eigengene and its evolutionary rates in 13 postnatal highly LT-specific modules (LT\_black).

| pig_Genebank   | pig_Gene     | LT     |        |         |           | meanExpr | LDEModule | Ka/Ks         |       |
|----------------|--------------|--------|--------|---------|-----------|----------|-----------|---------------|-------|
|                |              | Module | kTotal | kWithin | eigencorr |          |           |               |       |
| NM_001044593.1 | MYOZ2        | black  | 980.75 | 96.831  | 0.9938335 | 0.000581 | 518.232   | white         | 99    |
| NM_001044614.1 | TXNIP        | black  | 956.94 | 96.175  | 0.9928753 | 0.000721 | 144.45    | turquoise     | 0     |
| AK234286.1     | PER1         | black  | 958.4  | 98.866  | 0.9986797 | 5.76E-05 | 30.558    | blue          | 99    |
| AK230834.1     | TAF12        | black  | 836.9  | 90.376  | 0.9802317 | 0.003327 | 27.676    | blue          | --    |
| AK240376.1     | RPL17P4      | black  | 937.68 | 97.145  | 0.9947677 | 0.000454 | 92.706    | red           | --    |
| AK234534.1     | CSRP1        | black  | 943.76 | 98.184  | 0.9973253 | 0.000166 | 21.136    | darkgrey      | 0     |
| AK237626.1     | C1orf69      | black  | 964.33 | 94.415  | 0.9887768 | 0.001425 | 9.05      | navy          | 99    |
| AK237638.1     | PLEKHJ1      | black  | 950.22 | 86.276  | 0.9711145 | 0.005868 | 13.312    | turquoise     | 99    |
| AK231149.1     | DNAJC24      | black  | 846.54 | 91.14   | 0.9819183 | 0.002911 | 15.298    | turquoise     | --    |
| AK237784.1     | TBC1D1       | black  | 988.96 | 94.287  | 0.9882496 | 0.001526 | 10.368    | turquoise     | 0     |
| AK231556.1     | HSF2         | black  | 857.88 | 82.185  | 0.9614733 | 0.009025 | 52.83     | midnightblue  | 99    |
| AK235255.1     | TMEM131      | black  | 862.4  | 90.056  | 0.9794751 | 0.003519 | 45.962    | darkturquoise | 99    |
| AK232059.1     | TIMM44       | black  | 931.78 | 95.858  | 0.9919891 | 0.00086  | 16.086    | white         | 99    |
| AK235887.1     | WDR74        | black  | 917.68 | 76.482  | 0.9469944 | 0.014532 | 7.918     | turquoise     | 0.091 |
| AK238807.1     | PRELID1      | black  | 925.82 | 85.379  | 0.9687536 | 0.006599 | 29.456    | turquoise     | --    |
| AK232622.1     | GABARAPL1    | black  | 948.19 | 96.899  | 0.9941135 | 0.000542 | 16.154    | turquoise     | --    |
| AK236159.1     | ATP6V0E1     | black  | 980.77 | 96.031  | 0.9921035 | 0.000841 | 16.602    |               | --    |
| AK236249.1     | VAT1         | black  | 925.55 | 95.286  | 0.9911009 | 0.001006 | 14.344    | turquoise     | 0     |
| AK239346.1     | UBE2F        | black  | 972.53 | 98.89   | 0.9986697 | 5.82E-05 | 10.284    | navy          | 0     |
| AK236497.1     | PREB         | black  | 980.98 | 99.086  | 0.9991551 | 2.95E-05 | 15.732    | darkorange    | 0.401 |
| AK239601.1     | ACOT1        | black  | 956    | 97.405  | 0.9952451 | 0.000393 | 21.456    | blue          | --    |
| AK239710.1     | PRPSAP1      | black  | 730.47 | 75.764  | 0.9448006 | 0.015439 | 5.234     | black         | 0     |
| AK240077.1     | SUMO2        | black  | 947.23 | 87.205  | 0.9729412 | 0.005321 | 104.51    | lightyellow   | 99    |
| AK240079.1     | PDGFRB       | black  | 889.92 | 87.252  | 0.9734332 | 0.005177 | 9.056     | midnightblue  | --    |
| AK240201.1     | EIF4G1       | black  | 962.12 | 97.589  | 0.9959864 | 0.000305 | 18.326    | turquoise     | --    |
| NM_214014.2    | FOXO1        | black  | 747.99 | 77.724  | 0.9499353 | 0.013346 | 3.906     | lightcyan     | 99    |
| NM_214343.2    | QDPR         | black  | 980.2  | 98.19   | 0.9968723 | 0.00021  | 34.384    | green         | 0     |
| NM_001044575.2 | IDH3B        | black  | 943.64 | 97.248  | 0.9949259 | 0.000434 | 102.608   | black         | 0     |
| NM_001123135.1 | PLIN5        | black  | 930.96 | 96.798  | 0.994578  | 0.000479 | 3.848     | darkgrey      | 99    |
| NM_001123213.1 | VAPB         | black  | 972.6  | 97.644  | 0.9960558 | 0.000297 | 58.106    | blue          | 99    |
| XM_001928505.1 | WDYHV1       | black  | 982.32 | 98.688  | 0.9980029 | 0.000107 | 16.798    | midnightblue  | 0.077 |
| XM_001927918.1 | CASQ2        | black  | 893.81 | 90.778  | 0.9813347 | 0.003053 | 12.638    | pink          | 0.065 |
| XM_001927375.1 | NSMAF        | black  | 956.21 | 94.545  | 0.9893576 | 0.001316 | 9.32      | red           | 0.074 |
| XM_001928852.1 | C6orf145     | black  | 953.79 | 98.524  | 0.9980035 | 0.000107 | 30.15     | turquoise     | 99    |
| XM_001927771.1 | FBXL3        | black  | 935.79 | 96.674  | 0.9938572 | 0.000577 | 25.316    | turquoise     | 99    |
| XM_001925300.1 | OXNAD1       | black  | 960.21 | 96.504  | 0.9931408 | 0.000681 | 33.384    | red           | 0.214 |
| XM_001929115.1 | ANXA8        | black  | 977.24 | 99.251  | 0.9993493 | 1.99E-05 | 6.576     | turquoise     | 0.263 |
| XM_001926555.1 | LOC100287932 | black  | 970.44 | 98.55   | 0.9977315 | 0.00013  | 46.264    | turquoise     | --    |
| XM_001929155.1 | COMTD1       | black  | 988.21 | 97.15   | 0.994595  | 0.000477 | 9.058     | red           | --    |
| XM_001929270.1 | ACACB        | black  | 989.98 | 98.797  | 0.9982989 | 8.42E-05 | 57.244    | turquoise     | 0.024 |
| XM_001928076.1 | YWHAH        | black  | 991.78 | 97.85   | 0.9962396 | 0.000277 | 44.674    | white         | 0     |
| XM_001926296.1 | C22orf36     | black  | 919.13 | 95.694  | 0.9922125 | 0.000824 | 6.556     | red           | 0.205 |
| XM_001929539.1 | PPIL2        | black  | 958.69 | 93.676  | 0.9870542 | 0.001765 | 6.796     | blue          | 0     |
| XM_001924998.1 | SSB          | black  | 982.46 | 98.286  | 0.9972302 | 0.000175 | 53.948    | turquoise     | 0     |

|                |         |       |        |        |           |          |        |               |       |
|----------------|---------|-------|--------|--------|-----------|----------|--------|---------------|-------|
| XM_001928889.1 | ACOT8   | black | 967.24 | 98.896 | 0.9985421 | 6.68E-05 | 20.48  | pink          | 0.067 |
| XM_001927440.1 | SLC25A5 | black | 993.32 | 96.204 | 0.9925977 | 0.000764 | 15.008 | navy          | 0     |
| XM_001926010.1 | IGSF1   | black | 964.62 | 97.344 | 0.9949983 | 0.000424 | 2.638  | violet        | 0.799 |
| NM_213904.1    | GANAB   | black | 691.81 | 67.444 | 0.9219954 | 0.025844 | 13.828 | blue          | 0     |
| NM_213792.1    | HOPX    | black | 920.2  | 96.698 | 0.9941837 | 0.000532 | 12.212 | violet        | 99    |
| NM_001001860.1 | MAGED1  | black | 985.93 | 94.902 | 0.9897991 | 0.001235 | 55.85  | red           | 0     |
| AY609612.1     | GDE1    | black | 980.61 | 97.019 | 0.9942509 | 0.000523 | 66.864 | darkgrey      | 0     |
| AY609874.1     | RAB18   | black | 968.49 | 99.232 | 0.9993618 | 1.94E-05 | 86.276 | brown         | 0     |
| AY610021.1     | SNRPD1  | black | 982.26 | 99.216 | 0.9992396 | 2.52E-05 | 16.258 | violet        | 0     |
| AY610107.1     | CBX5    | black | 948.95 | 87.086 | 0.972772  | 0.005371 | 43.348 | blue          | --    |
| AY610175.1     | MAGOH   | black | 981.43 | 98.184 | 0.9969973 | 0.000197 | 10.502 | turquoise     | 99    |
| AY610191.1     | TIMM17A | black | 963.52 | 96.419 | 0.9929198 | 0.000714 | 27.32  | turquoise     | --    |
| CF178224       |         | black | 905.97 | 92.551 | 0.9848432 | 0.002235 | 6.756  | turquoise     | 0     |
| BX667112       |         | black | 961.78 | 90.194 | 0.9801984 | 0.003335 | 97.84  | violet        | --    |
| BX670270       |         | black | 892.26 | 94.016 | 0.9885193 | 0.001474 | 27.612 | turquoise     | --    |
| BX670342       |         | black | 977.76 | 91.477 | 0.9820887 | 0.00287  | 50.314 | green         | --    |
| BX673567       |         | black | 977.39 | 98.946 | 0.9986131 | 6.20E-05 | 29.604 | lightcyan     | --    |
| BP159931       |         | black | 885.92 | 92.667 | 0.9851318 | 0.002171 | 16.164 | turquoise     | --    |
| BP163106       |         | black | 936.59 | 92.179 | 0.9838603 | 0.002455 | 9.164  | green         | --    |
| CK454369       |         | black | 991.68 | 95.334 | 0.9905934 | 0.001094 | 15.158 | navy          | --    |
| CK458404       |         | black | 807.57 | 87.683 | 0.9740609 | 0.004995 | 5.108  | blue          | 0     |
| CK463600       |         | black | 843.15 | 88.594 | 0.9765763 | 0.004288 | 31.506 | brown         | --    |
| CK467671       |         | black | 993.38 | 94.713 | 0.9892806 | 0.00133  | 24.012 | turquoise     | --    |
| BX915635       |         | black | 944.05 | 97.944 | 0.9969916 | 0.000198 | 3.692  | black         | --    |
| BX917599       |         | black | 976.41 | 97.086 | 0.9945891 | 0.000477 | 22.194 | black         | 0     |
| BX921788       |         | black | 965.42 | 96.063 | 0.9923173 | 0.000807 | 43.786 | green         | --    |
| BX923137       |         | black | 926.75 | 84.515 | 0.9669714 | 0.00717  | 12.986 | turquoise     | --    |
| BX923538       |         | black | 955.25 | 91.934 | 0.9835644 | 0.002523 | 45.992 | darkturquoise | --    |
| BX926942       |         | black | 993.79 | 95.544 | 0.9910961 | 0.001007 | 23.4   | midnightblue  | --    |
| CN155836       |         | black | 978.26 | 96.887 | 0.993946  | 0.000565 | 19.508 | grey60        | --    |
| CN158795       |         | black | 978.57 | 98.528 | 0.9977143 | 0.000131 | 17.786 | turquoise     | --    |
| CN159661       |         | black | 981.35 | 94.554 | 0.988761  | 0.001428 | 10.178 | grey60        | --    |
| CN162200       |         | black | 867.23 | 79.967 | 0.9561563 | 0.010948 | 10.074 | lightyellow   | 0.492 |
| CN163978       |         | black | 948.7  | 96.274 | 0.9928891 | 0.000719 | 9.656  | turquoise     | --    |
| CN164046       |         | black | 906.03 | 94.358 | 0.9887736 | 0.001425 | 2.944  | lightgreen    | --    |
| CJ010554       |         | black | 960.74 | 98.581 | 0.997886  | 0.000117 | 9.566  | turquoise     | 99    |
| CJ012319       |         | black | 953.82 | 98.513 | 0.997979  | 0.000109 | 29.456 | turquoise     | --    |
| CJ025623       |         | black | 978.74 | 96.414 | 0.9928735 | 0.000721 | 26.404 | turquoise     | --    |
| CJ027205       |         | black | 961.83 | 98.488 | 0.9980414 | 0.000104 | 16.12  | turquoise     | 99    |
| DN104085       |         | black | 621.69 | 64.201 | 0.9116713 | 0.031092 | 3.822  | yellow        | 99    |
| DN106307       |         | black | 802.9  | 78.084 | 0.9511863 | 0.012851 | 36.876 | blue          | --    |
| DN113940       |         | black | 945.77 | 97.37  | 0.9952009 | 0.000399 | 8.934  | blue          | --    |
| BW956903       |         | black | 805.33 | 77.382 | 0.9495562 | 0.013497 | 2.598  | midnightblue  | --    |
| BW980990       |         | black | 963.83 | 98.302 | 0.9972205 | 0.000176 | 11.126 | turquoise     | --    |
| AJ960916       |         | black | 960.39 | 96.675 | 0.9934868 | 0.00063  | 13.646 | turquoise     | --    |
| AJ944959       |         | black | 865.51 | 84.353 | 0.9664075 | 0.007354 | 19.6   | magenta       | --    |
| DV226293       |         | black | 923.31 | 86.636 | 0.9717132 | 0.005687 | 54.968 | turquoise     | 0     |
| DY417691       |         | black | 870.1  | 91.873 | 0.9832853 | 0.002588 | 26.368 | green         | --    |

|          |       |        |        |           |          |         |              |    |    |
|----------|-------|--------|--------|-----------|----------|---------|--------------|----|----|
| DY427781 | black | 980.12 | 99.138 | 0.9990538 | 3.49E-05 | 6.012   | lightgreen   | -- |    |
| DY433232 | black | 938.71 | 97.562 | 0.9961556 | 0.000286 | 16.642  | white        | -- |    |
| DB802144 | black | 978.53 | 98.202 | 0.9971961 | 0.000178 | 22.07   | turquoise    | -- | 0  |
| DT331317 | black | 649.8  | 65.987 | 0.9170508 | 0.028319 | 3.366   | black        | -- | 0  |
| DT331844 | black | 956.64 | 82.497 | 0.9614408 | 0.009036 | 2.024   | orange       | -- |    |
| EW177852 | black | 927.93 | 85.919 | 0.9703656 | 0.006097 | 7.034   | midnightblue | -- |    |
| EW249232 | black | 859.7  | 87.856 | 0.9747957 | 0.004785 | 3.174   | salmon       | -- |    |
| EW266525 | black | 964.58 | 99.064 | 0.9989998 | 3.80E-05 | 20.564  | blue         | -- | 99 |
| EW292285 | black | 946.48 | 97.738 | 0.9966014 | 0.000238 | 21.53   | turquoise    | -- |    |
| EW413069 | black | 998.9  | 96.689 | 0.9937209 | 0.000597 | 165.918 | turquoise    | -- |    |
| EW444151 | black | 810.98 | 77.332 | 0.9492504 | 0.013619 | 3.658   | red          | -- |    |
| EW595278 | black | 976    | 88.699 | 0.9764099 | 0.004334 | 22.202  | pink         | -- | 99 |
| EW640642 | black | 986.1  | 95.679 | 0.9913047 | 0.000972 | 31.28   | lightcyan    | -- |    |
| EX655280 | black | 934.97 | 97.234 | 0.9952413 | 0.000394 | 22.896  | lightcyan    | -- |    |
| BQ603893 | black | 935.68 | 96.708 | 0.9937732 | 0.000589 | 5.332   | violet       | -- |    |
| BQ605071 | black | 882.95 | 94.182 | 0.9887828 | 0.001424 | 4.226   | white        | -- |    |

---

Table S11-2. Module eigengene and its evolutionary rates in 13 postnatal highly LT-specific modules (LT\_darkmagenta).

| pig_Genebank   | pig_Gene | LDE         |             | kTotal | kWithin | eigencorr | eigenpval | meanExpr | Ka/Ks |
|----------------|----------|-------------|-------------|--------|---------|-----------|-----------|----------|-------|
|                |          | Module      | LTModule    |        |         |           |           |          |       |
| NM_001044545.1 | PLAGL1   | white       | darkmagenta | 973.9  | 26.857  | 0.99297   | 0.000707  | 21.52    | 0     |
| AK234337.1     | TBC1D17  | blue        | darkmagenta | 794.34 | 23.263  | 0.96422   | 0.008082  | 18.468   | 99    |
| AK230893.1     | NECAP1   | blue        | darkmagenta | 972.55 | 26.196  | 0.98738   | 0.001698  | 14.17    | --    |
| AK231707.1     | FBL      | turquoise   | darkmagenta | 907.48 | 25.348  | 0.98155   | 0.003001  | 32.212   | 99    |
| AK236196.1     | DDA1     | tan         | darkmagenta | 967.21 | 24.979  | 0.97859   | 0.003749  | 23.924   | --    |
| AK236528.1     | RHEB     | darkorange  | darkmagenta | 962.48 | 26.916  | 0.99329   | 0.000659  | 100.946  | 0     |
| AK233343.1     | RBM10    | black       | darkmagenta | 805.8  | 23.314  | 0.96434   | 0.00804   | 53.59    | 0     |
| AK240018.1     | PQLC2    | turquoise   | darkmagenta | 949.23 | 26.909  | 0.99342   | 0.00064   | 4.338    | 0     |
| NM_001123090.1 | C6orf153 | turquoise   | darkmagenta | 956.76 | 26.518  | 0.99006   | 0.001188  | 22.168   | --    |
| XM_001925477.1 | ITGA9    | darkgrey    | darkmagenta | 961.58 | 26.916  | 0.99343   | 0.000638  | 15.556   | 99    |
| XM_001929169.1 | RANGAP1  | turquoise   | darkmagenta | 886.13 | 25.264  | 0.9805    | 0.00326   | 9.87     | 0     |
| XM_001929457.1 | SHMT2    | turquoise   | darkmagenta | 893.67 | 25.098  | 0.97969   | 0.003464  | 12.368   | --    |
| XM_001924445.1 | PSMB5    | yellow      | darkmagenta | 962.09 | 26.738  | 0.99177   | 0.000895  | 191.306  | 99    |
| XM_001927395.1 | SFXN4    | blue        | darkmagenta | 909.67 | 25.835  | 0.985     | 0.0022    | 14.356   | 0.881 |
| XM_001928374.1 | NDST2    | black       | darkmagenta | 985.76 | 25.499  | 0.98216   | 0.002853  | 27.514   | 99    |
| XM_001925471.1 | GPC4     | turquoise   | darkmagenta | 947.5  | 26.669  | 0.99158   | 0.000927  | 5.252    | --    |
| NM_214063.1    | HMGB2    | turquoise   | darkmagenta | 982.01 | 26.574  | 0.99079   | 0.00106   | 9.066    | 0.823 |
| NM_001001537.1 | ITIH4    | lightyellow | darkmagenta | 831.11 | 23.583  | 0.96706   | 0.00714   | 5.638    | 0.17  |
| AY610003.1     | ISCA2    | turquoise   | darkmagenta | 973.07 | 26.246  | 0.98825   | 0.001527  | 11.498   | 99    |
| BX675434       |          | pink        | darkmagenta | 989.59 | 26.518  | 0.99002   | 0.001196  | 27.728   | --    |
| BX676463       |          | blue        | darkmagenta | 933.87 | 26.489  | 0.99002   | 0.001196  | 10.248   | --    |
| BP164138       |          | brown       | darkmagenta | 983.15 | 26.085  | 0.98655   | 0.001868  | 20.47    | --    |
| BP171209       |          | turquoise   | darkmagenta | 939.32 | 26.955  | 0.99373   | 0.000596  | 8.774    | --    |
| CK466455       |          | white       | darkmagenta | 987.17 | 27.198  | 0.99534   | 0.000382  | 1.27     | --    |
| BX923017       |          | green       | darkmagenta | 955.21 | 25.048  | 0.9792    | 0.003589  | 34.182   | 99    |
| CN155162       |          | white       | darkmagenta | 928.78 | 25.633  | 0.98342   | 0.002556  | 18.712   | --    |
| DN116668       |          | blue        | darkmagenta | 914.9  | 26.558  | 0.99084   | 0.001051  | 6.57     | --    |
| DT322875       |          | pink        | darkmagenta | 987.52 | 26.695  | 0.99138   | 0.00096   | 978.536  | --    |
| EW133862       |          | darkgreen   | darkmagenta | 974.71 | 26.139  | 0.98692   | 0.001791  | 477.792  | --    |
| EW569616       |          | blue        | darkmagenta | 959.25 | 26.851  | 0.99294   | 0.000711  | 13.432   | --    |
| BF712794       |          | darkgreen   | darkmagenta | 803.3  | 22.996  | 0.96142   | 0.009044  | 4.756    | --    |



Table S11-3. Module eigengene and its evolutionary rates in 13 postnatal highly LT-specific modules (LT\_grey60).

| pig_Genebank   | pig_Gene  | LDEModule     | LT     |        | kTotal | kWithin | eigencorr | eigenpval | meanExpr | Ka/Ks |
|----------------|-----------|---------------|--------|--------|--------|---------|-----------|-----------|----------|-------|
|                |           |               | Module | grey60 |        |         |           |           |          |       |
| AK231088.1     | NMD3      | turquoise     | grey60 | grey60 | 923.1  | 62.471  | 0.9956    | 0.00035   | 40.222   | 0     |
| AK234682.1     | APH1A     | red           | grey60 | grey60 | 971.7  | 62.824  | 0.99674   | 0.000223  | 4.054    | --    |
| AK235131.1     | U2AF1     | black         | grey60 | grey60 | 954.6  | 62.961  | 0.99719   | 0.000179  | 81.826   | --    |
| AK235345.1     | MLLT3     | yellow        | grey60 | grey60 | 855    | 58.325  | 0.98157   | 0.002996  | 12.862   | 0     |
| AK232271.1     | PHB2      | blue          | grey60 | grey60 | 974.7  | 61.168  | 0.99136   | 0.000962  | 100.97   | 0     |
| AK235894.1     | GNL3L     | blue          | grey60 | grey60 | 981.2  | 59.967  | 0.98721   | 0.001733  | 16.17    | 0.102 |
| AK232688.1     | ABCF3     | black         | grey60 | grey60 | 839.6  | 57.383  | 0.97833   | 0.003816  | 15.008   | 0     |
| AK236271.1     | MED9      | turquoise     | grey60 | grey60 | 835.9  | 58.309  | 0.98157   | 0.002995  | 5.462    | --    |
| AK239254.1     | GAR1      | turquoise     | grey60 | grey60 | 940.3  | 62.813  | 0.99666   | 0.000232  | 7.26     | 99    |
| AK230605.1     | CCNC      | midnightblue  | grey60 | grey60 | 946.7  | 60.674  | 0.98955   | 0.001281  | 17.05    | 0     |
| AK239563.1     | CCT5      | midnightblue  | grey60 | grey60 | 974.8  | 63.141  | 0.99772   | 0.000131  | 81.628   | --    |
| AK239689.1     | PSMD8     | darkorange    | grey60 | grey60 | 976.6  | 59.978  | 0.98724   | 0.001727  | 72.864   | 0     |
| AK240022.1     | MRTO4     | violet        | grey60 | grey60 | 964.8  | 62.17   | 0.9945    | 0.000489  | 32.852   | 0.508 |
| AK233680.1     | MRPL36    | blue          | grey60 | grey60 | 950.1  | 59.842  | 0.98684   | 0.001809  | 7.5      | 99    |
| AK237314.1     | DNAJB5    | darkmagenta   | grey60 | grey60 | 929.9  | 62.942  | 0.99713   | 0.000184  | 17.914   | 0     |
| AK234149.1     | CD320     | pink          | grey60 | grey60 | 950.7  | 63.494  | 0.9989    | 4.39E-05  | 2.378    | --    |
| NM_001078679.1 | CD81      | blue          | grey60 | grey60 | 924.3  | 61.706  | 0.99302   | 0.000699  | 10.154   | --    |
| EU561660.1     | CFL2      | turquoise     | grey60 | grey60 | 876.2  | 61.074  | 0.99099   | 0.001026  | 476.374  | 99    |
| NM_001123203.1 | PMEP1     | yellow        | grey60 | grey60 | 951.1  | 61.938  | 0.99376   | 0.000591  | 12.782   | --    |
| XM_001928937.1 | SIX1      | darkorange    | grey60 | grey60 | 998.3  | 59.541  | 0.98572   | 0.002043  | 126.722  | 0     |
| XM_001927513.1 | MPHOSPH10 | black         | grey60 | grey60 | 961.8  | 60.815  | 0.98995   | 0.001208  | 9.534    | 99    |
| XM_001924580.1 | C15orf61  | pink          | grey60 | grey60 | 924.6  | 62.291  | 0.99495   | 0.00043   | 70.518   | --    |
| XM_001928869.1 | PEX19     | royalblue     | grey60 | grey60 | 956.5  | 62.974  | 0.99726   | 0.000172  | 55.492   | 0.177 |
| XM_001926890.1 | CPSF2     | turquoise     | grey60 | grey60 | 941.9  | 62.29   | 0.99506   | 0.000417  | 35.566   | 0     |
| XM_001929510.1 | GTPBP2    | red           | grey60 | grey60 | 804.5  | 54.648  | 0.96835   | 0.006728  | 9.754    | --    |
| XM_001927951.1 | PPP1R11   | greenyellow   | grey60 | grey60 | 975.5  | 61.86   | 0.99351   | 0.000627  | 3.166    | --    |
| XM_001928445.1 | C6orf1    | greenyellow   | grey60 | grey60 | 961.9  | 60.355  | 0.98838   | 0.0015    | 1.838    | 0     |
| XM_001928861.1 | MUSTN1    | darkturquoise | grey60 | grey60 | 958.6  | 61.979  | 0.99397   | 0.000562  | 565.862  | --    |
| XM_001929110.1 | ZFYVE27   | blue          | grey60 | grey60 | 968.4  | 61.195  | 0.99146   | 0.000946  | 11.394   | 0.196 |
| XM_001928164.1 | NUP133    | blue          | grey60 | grey60 | 950.5  | 63.05   | 0.99742   | 0.000157  | 8.012    | 0.039 |
| XM_001925079.1 | ARID5B    | turquoise     | grey60 | grey60 | 947.9  | 63.262  | 0.99816   | 9.49E-05  | 12.518   | 0.585 |
| XM_001924558.1 | TRAFD1    | turquoise     | grey60 | grey60 | 920.3  | 61.479  | 0.99233   | 0.000806  | 8.584    | 0     |
| XM_001925356.1 | RNF10     | midnightblue  | grey60 | grey60 | 960.7  | 60.451  | 0.98887   | 0.001408  | 44.912   | 0.43  |
| XM_001924460.1 | CNOT7     | midnightblue  | grey60 | grey60 | 961.3  | 60.795  | 0.99002   | 0.001195  | 50.348   | 0     |
| XM_001926406.1 | ACOT9     | blue          | grey60 | grey60 | 977.8  | 61.075  | 0.99086   | 0.001048  | 34.47    | 0     |
| NM_214223.2    | THOP1     | blue          | grey60 | grey60 | 916.1  | 62.507  | 0.99573   | 0.000335  | 4.636    | 0     |
| AY421755.1     | HMOX2     | blue          | grey60 | grey60 | 918.7  | 61.001  | 0.99072   | 0.001071  | 3.3      | --    |
| NM_213911.1    | PGRMC1    | turquoise     | grey60 | grey60 | 979.1  | 58.674  | 0.98262   | 0.002744  | 64.316   | 0     |
| AY609773.1     | OTUB1     | greenyellow   | grey60 | grey60 | 964.2  | 62.039  | 0.99411   | 0.000542  | 5.726    | 99    |
| AY609821.1     | TMEM208   | turquoise     | grey60 | grey60 | 980.5  | 62.862  | 0.99686   | 0.000211  | 12.87    | 99    |
| NM_001038007.1 | SFRS1     | green         | grey60 | grey60 | 990.9  | 61.828  | 0.99343   | 0.000639  | 77.798   | 99    |
| BX674049       |           | pink          | grey60 | grey60 | 866.8  | 60.6    | 0.9894    | 0.001307  | 2.966    | --    |
| BX675793       |           | orange        | grey60 | grey60 | 986.9  | 62.703  | 0.99635   | 0.000264  | 5.414    | --    |
| BP158663       |           | brown         | grey60 | grey60 | 932.5  | 62.16   | 0.99457   | 0.00048   | 16.424   | 99    |

|          |               |        |       |        |         |          |        |    |
|----------|---------------|--------|-------|--------|---------|----------|--------|----|
| CK452102 | turquoise     | grey60 | 886.6 | 60.057 | 0.98754 | 0.001666 | 45.718 | -- |
| CK459106 | black         | grey60 | 799.3 | 57.012 | 0.97696 | 0.004183 | 12.886 | 99 |
| CK460594 | pink          | grey60 | 975.9 | 60.576 | 0.98913 | 0.001358 | 17.394 | -- |
| BX918046 | lightcyan     | grey60 | 983.4 | 59.243 | 0.98468 | 0.002271 | 24.074 | -- |
| BX918145 | black         | grey60 | 814.8 | 56.743 | 0.97601 | 0.004444 | 9.968  | -- |
| BX919338 | black         | grey60 | 846.8 | 59.222 | 0.98467 | 0.002272 | 8.148  | 99 |
| BX922019 | turquoise     | grey60 | 976.3 | 61.616 | 0.99264 | 0.000757 | 16.28  | -- |
| CN164027 | midnightblue  | grey60 | 906.6 | 62.234 | 0.99482 | 0.000447 | 31.818 | -- |
| CJ024433 | brown         | grey60 | 969.8 | 60.215 | 0.98808 | 0.001559 | 18.94  | -- |
| DN118663 | blue          | grey60 | 940.1 | 61.946 | 0.99378 | 0.000589 | 9.85   | -- |
| BW979375 | turquoise     | grey60 | 925.3 | 62.814 | 0.99669 | 0.000228 | 4.464  | -- |
| BW979917 | yellow        | grey60 | 988.9 | 58.406 | 0.98169 | 0.002965 | 12.09  | -- |
| AJ962601 | turquoise     | grey60 | 906.8 | 62.034 | 0.99413 | 0.00054  | 2.552  | -- |
| DV225844 | greenyellow   | grey60 | 965.3 | 61.107 | 0.99109 | 0.001008 | 54.14  | -- |
| DB786410 | red           | grey60 | 926.7 | 61.484 | 0.99241 | 0.000793 | 10.68  | -- |
| DT323640 | blue          | grey60 | 963.8 | 62.371 | 0.99523 | 0.000396 | 3.808  | -- |
| EV889890 | yellow        | grey60 | 946.7 | 61.573 | 0.99265 | 0.000756 | 15.858 | -- |
| EV897247 | paleturquoise | grey60 | 991.6 | 59.469 | 0.98545 | 0.002101 | 15.488 | -- |
| EW239772 | pink          | grey60 | 872.3 | 60.17  | 0.98794 | 0.001587 | 1.918  | -- |
| EW471282 | turquoise     | grey60 | 979.2 | 59.799 | 0.9865  | 0.001879 | 14.098 | -- |
| EW572411 | turquoise     | grey60 | 910.1 | 61.384 | 0.99206 | 0.000848 | 6.964  | -- |
| EW580189 | white         | grey60 | 858.4 | 58.612 | 0.98267 | 0.002732 | 4.73   | -- |
| EW594090 | turquoise     | grey60 | 909.6 | 59.998 | 0.98734 | 0.001707 | 5.522  | -- |
| EW623428 | black         | grey60 | 880.4 | 60.279 | 0.98829 | 0.001519 | 22.626 | -- |

---

Table S11-4. Module eigengene and its evolutionary rates in 13 postnatal highly LT-specific modules (LT\_lightgreen).

| pig_Genebank   | pig_Gene | LDEModule    | LTModule   | kTotal | kWithin | eigencorr | eigenpval | meanExpr | Ka/Ks |
|----------------|----------|--------------|------------|--------|---------|-----------|-----------|----------|-------|
| AK234182.1     | SERHL2   | pink         | lightgreen | 304.9  | 58.661  | 0.99036   | 0.001135  | 0.794    | --    |
| AK237852.1     |          | white        | lightgreen | 296.6  | 60.577  | 0.99698   | 0.000199  | 5.428    | --    |
| AK237969.1     |          | turquoise    | lightgreen | 292.2  | 60.472  | 0.9966    | 0.000238  | 21.056   | --    |
| AK238113.1     |          | red          | lightgreen | 284.7  | 55.238  | 0.97823   | 0.003843  | 1.348    | --    |
| AK235023.1     |          | red          | lightgreen | 290.9  | 60.452  | 0.99651   | 0.000248  | 1.884    | --    |
| AK231815.1     |          | pink         | lightgreen | 283.9  | 60.405  | 0.99641   | 0.000258  | 0.252    | --    |
| AK231927.1     |          | red          | lightgreen | 261.8  | 55.213  | 0.97809   | 0.003881  | 1.202    | --    |
| AK239218.1     |          | turquoise    | lightgreen | 300.7  | 60      | 0.995     | 0.000424  | 7.096    | --    |
| AK236699.1     | FSCN1    | blue         | lightgreen | 291.2  | 58.913  | 0.99135   | 0.000965  | 3.794    | 99    |
| XM_001924525.1 | C18orf22 | pink         | lightgreen | 292    | 54.603  | 0.97586   | 0.004485  | 41.624   | 99    |
| XM_001924870.1 | IBTK     | pink         | lightgreen | 294.8  | 57.794  | 0.98733   | 0.001708  | 2.834    | 0.068 |
| XM_001929668.1 | SETDB1   | pink         | lightgreen | 303    | 60.827  | 0.99779   | 0.000124  | 7.636    | 0     |
| XM_001925622.1 | HAPLN3   | pink         | lightgreen | 300    | 60.534  | 0.99681   | 0.000216  | 4.538    | 0     |
| NM_001130531.1 | ADAM10   | blue         | lightgreen | 303.5  | 56.259  | 0.98186   | 0.002924  | 3.26     | 99    |
| NM_213791.1    | MYL2     | pink         | lightgreen | 290.8  | 57.898  | 0.98773   | 0.001629  | 4.344    | --    |
| AY610106.1     | PLA2G7   | pink         | lightgreen | 297.8  | 61.22   | 0.99912   | 3.13E-05  | 1.034    | 0.083 |
| CB471233       |          | red          | lightgreen | 291.9  | 60.071  | 0.9952    | 0.000398  | 2.244    | --    |
| CF179357       |          | pink         | lightgreen | 306.1  | 59.671  | 0.99388   | 0.000575  | 6.976    | --    |
| CK454028       |          | magenta      | lightgreen | 302.4  | 57.787  | 0.98729   | 0.001718  | 13.642   | --    |
| CK459217       |          | pink         | lightgreen | 283.9  | 60.405  | 0.99641   | 0.000258  | 0.102    | --    |
| CK464272       |          | lightyellow  | lightgreen | 291.4  | 57.643  | 0.9869    | 0.001796  | 7.628    | --    |
| BX915038       |          | lightgreen   | lightgreen | 287.7  | 55.133  | 0.97793   | 0.003922  | 13.354   | --    |
| CN153338       |          | white        | lightgreen | 306.3  | 58.996  | 0.99157   | 0.000927  | 58.408   | --    |
| CN153908       |          | turquoise    | lightgreen | 274.1  | 58.799  | 0.99097   | 0.001029  | 1.528    | --    |
| CN159109       |          | turquoise    | lightgreen | 253.8  | 53.726  | 0.97266   | 0.005404  | 8.634    | --    |
| CN167094       |          | pink         | lightgreen | 289.8  | 58.953  | 0.9914    | 0.000957  | 1.67     | --    |
| CO939672       |          | white        | lightgreen | 308.1  | 59.314  | 0.99263   | 0.000759  | 8.71     | --    |
| DN107792       |          | green        | lightgreen | 291.8  | 59.075  | 0.99176   | 0.000897  | 11.84    | --    |
| DN124245       |          | violet       | lightgreen | 301.1  | 57.947  | 0.98786   | 0.001603  | 2.36     | --    |
| DN124360       |          | red          | lightgreen | 301.1  | 60.802  | 0.99769   | 0.000133  | 3.062    | --    |
| DN125831       |          | midnightblue | lightgreen | 280.9  | 56.354  | 0.98212   | 0.002861  | 13.56    | --    |
| DN129771       |          | pink         | lightgreen | 280.4  | 54.171  | 0.97425   | 0.004942  | 4.154    | --    |
| AJ947061       |          | red          | lightgreen | 291.4  | 58.007  | 0.98812   | 0.001552  | 2.204    | --    |
| AJ947409       |          | pink         | lightgreen | 258    | 53.548  | 0.97191   | 0.005626  | 10.304   | --    |
| AJ949618       |          | red          | lightgreen | 257.3  | 54.789  | 0.97663   | 0.004273  | 3.408    | --    |
| AJ949964       |          | brown        | lightgreen | 287.2  | 60.236  | 0.99581   | 0.000326  | 13.064   | --    |
| AJ955864       |          | red          | lightgreen | 278.9  | 56.706  | 0.98339   | 0.002563  | 6.338    | --    |
| AJ956044       |          | white        | lightgreen | 273.1  | 55.524  | 0.9793    | 0.003565  | 2.382    | --    |
| AJ957673       |          | navy         | lightgreen | 304.5  | 59.205  | 0.99224   | 0.000819  | 1.688    | --    |
| AJ960375       |          | white        | lightgreen | 294.8  | 61.208  | 0.9991    | 3.22E-05  | 10.732   | --    |
| AJ960509       |          | white        | lightgreen | 274.7  | 58.493  | 0.98986   | 0.001223  | 1.8      | --    |
| AJ940806       |          | pink         | lightgreen | 270.4  | 56.249  | 0.98178   | 0.002943  | 8.334    | --    |
| CV875565       |          | blue         | lightgreen | 279.1  | 56.671  | 0.98326   | 0.002594  | 2.596    | --    |
| DY426213       |          | red          | lightgreen | 290.8  | 59.056  | 0.99186   | 0.000881  | 2.356    | --    |
| DB812092       |          | red          | lightgreen | 288.7  | 59.933  | 0.99478   | 0.000452  | 2.11     | --    |

|          |             |            |       |        |         |          |          |   |
|----------|-------------|------------|-------|--------|---------|----------|----------|---|
| DB788903 | green       | lightgreen | 294.9 | 60.794 | 0.99771 | 0.000132 | 28.15 -- |   |
| DB805764 | navy        | lightgreen | 299.7 | 60.999 | 0.99836 | 7.99E-05 | 1.3 --   |   |
| DV937193 | darkgrey    | lightgreen | 293.1 | 60.252 | 0.9959  | 0.000314 | 0.978 -- |   |
| EV860684 | pink        | lightgreen | 301.8 | 58.372 | 0.98935 | 0.001317 | 2.832 -- |   |
| EV867707 | pink        | lightgreen | 306.2 | 59.838 | 0.99445 | 0.000496 | 1.862 -- |   |
| EW024219 | white       | lightgreen | 275.6 | 55.365 | 0.97869 | 0.003723 | 9.202 -- |   |
| EW129342 | violet      | lightgreen | 292.2 | 58.94  | 0.99132 | 0.000969 | 3.156 -- |   |
| EW143342 | brown       | lightgreen | 302.1 | 60.009 | 0.99505 | 0.000418 | 4.352 -- | 0 |
| EW150678 | blue        | lightgreen | 291.1 | 58.211 | 0.98881 | 0.001418 | 5.282 -- |   |
| EW293220 | greenyellow | lightgreen | 259.8 | 55.763 | 0.98015 | 0.003346 | 7.742 -- |   |
| EW419154 | white       | lightgreen | 286.1 | 60.491 | 0.99667 | 0.00023  | 6.182 -- |   |
| EW457527 | violet      | lightgreen | 277.3 | 58.955 | 0.99142 | 0.000953 | 1.444 -- |   |
| EW527078 | white       | lightgreen | 302.8 | 59.514 | 0.99332 | 0.000655 | 8.032 -- |   |
| EW534339 | brown       | lightgreen | 290.6 | 54.813 | 0.97653 | 0.0043   | 14.82 -- |   |
| EW537634 | navy        | lightgreen | 302.5 | 55.912 | 0.9807  | 0.00321  | 0.866 -- |   |
| EW587403 | purple      | lightgreen | 283.9 | 60.405 | 0.99641 | 0.000258 | 0.102 -- |   |
| EW633660 | red         | lightgreen | 274.7 | 58.321 | 0.98925 | 0.001336 | 2.776 -- |   |
| EH006647 | black       | lightgreen | 292.6 | 56.945 | 0.98429 | 0.002359 | 2.372 -- |   |
| AW656641 | turquoise   | lightgreen | 287.2 | 59.981 | 0.99492 | 0.000435 | 2.836 -- |   |
| BF710522 | lightcyan   | lightgreen | 266.6 | 56.207 | 0.98173 | 0.002957 | 1.84 --  |   |
| BM659726 | pink        | lightgreen | 296   | 58.891 | 0.99118 | 0.000993 | 2.874 -- |   |

---

Table S11-5. Module eigengene and its evolutionary rates in 13 postnatal highly LT-specific modules (LT\_lightyellow).

| pig_Genebank   | pig_Gene      | LDEModule     | LTModule    | kTotal | kWithin | eigencorr | eigenpval | meanExpr | Ka/Ks |
|----------------|---------------|---------------|-------------|--------|---------|-----------|-----------|----------|-------|
| NM_001044576.1 | LOC733643     | blue          | lightyellow | 852.4  | 59.973  | 0.98831   | 0.001515  | 15.828   | 0.075 |
| AK231179.1     | DDR1          | black         | lightyellow | 836.8  | 59.141  | 0.98551   | 0.002089  | 15.838   | --    |
| AK231509.1     |               | yellow        | lightyellow | 976.8  | 63.027  | 0.99835   | 8.05E-05  | 3.03     | 0.178 |
| AK235325.1     | SFRS2         | midnightblue  | lightyellow | 999    | 59.705  | 0.98731   | 0.001712  | 249.932  | 0     |
| AK235558.1     |               | orange        | lightyellow | 990    | 62.652  | 0.99711   | 0.000186  | 9.398    | 0     |
| AK235599.1     |               | turquoise     | lightyellow | 993.3  | 62.422  | 0.99638   | 0.000261  | 28.626   | 99    |
| AK232498.1     |               | grey          | lightyellow | 993.6  | 61.511  | 0.99337   | 0.000647  | 6.636    | --    |
| AK232704.1     |               | navy          | lightyellow | 972.6  | 63.258  | 0.9991    | 3.26E-05  | 1533.93  | 0.359 |
| AK235982.1     |               | midnightblue  | lightyellow | 979.3  | 63.171  | 0.9988    | 4.99E-05  | 12.236   | 0.504 |
| AK236189.1     |               | midnightblue  | lightyellow | 865    | 60.495  | 0.99009   | 0.001183  | 13.904   | --    |
| AK239620.1     |               | brown         | lightyellow | 1001   | 60.795  | 0.99097   | 0.001029  | 22.308   | --    |
| AK240009.1     |               | blue          | lightyellow | 866.3  | 60.545  | 0.99026   | 0.001153  | 8.184    | --    |
| AK240109.1     |               | turquoise     | lightyellow | 987.1  | 62.995  | 0.99824   | 8.87E-05  | 64.456   | --    |
| AK234130.1     |               | violet        | lightyellow | 874.7  | 60.659  | 0.99065   | 0.001083  | 3.18     | 0.302 |
| NM_001032376.2 | HPRT1         | turquoise     | lightyellow | 970.3  | 63.303  | 0.99924   | 2.53E-05  | 20.716   | --    |
| NM_001101824.1 | SBAB-707F1.11 | turquoise     | lightyellow | 973.4  | 63.252  | 0.99907   | 3.41E-05  | 16.432   | 99    |
| XM_001929334.1 | LOC100155784  | violet        | lightyellow | 905.3  | 62.18   | 0.99563   | 0.000347  | 5.54     | 99    |
| XM_001926377.1 | LOC100154317  | turquoise     | lightyellow | 997.1  | 61.851  | 0.99448   | 0.000492  | 96.44    | 0.134 |
| XM_001929654.1 | LOC100153061  | darkgreen     | lightyellow | 963.3  | 63.324  | 0.99931   | 2.17E-05  | 19.302   | 0     |
| XM_001925252.1 | LOC100155091  | blue          | lightyellow | 961.6  | 63.184  | 0.99887   | 4.54E-05  | 15.102   | 0     |
| XM_001928638.1 | LOC100155796  | darkorange    | lightyellow | 944.5  | 63.127  | 0.99869   | 5.66E-05  | 4.084    | 0     |
| XM_001927577.1 | LOC100154266  | violet        | lightyellow | 969.1  | 63.383  | 0.9995    | 1.36E-05  | 31.654   | 0.08  |
| XM_001927602.1 | LOC100156140  | turquoise     | lightyellow | 956.4  | 63.086  | 0.99857   | 6.46E-05  | 22.242   | 0     |
| XM_001928156.1 | LOC100156794  | darkgrey      | lightyellow | 996.8  | 61.634  | 0.99377   | 0.000589  | 6.44     | 0.125 |
| XM_001924775.1 | LOC100154322  | darkred       | lightyellow | 1002   | 61.178  | 0.99224   | 0.000819  | 33.352   | 0     |
| XM_001927107.1 | LOC100157894  | white         | lightyellow | 999.8  | 61.793  | 0.9943    | 0.000516  | 5.538    | --    |
| AY216477.1     | GLUL          | tan           | lightyellow | 976.5  | 62.475  | 0.99663   | 0.000235  | 42.086   | --    |
| NM_213914.1    | FAAH          | violet        | lightyellow | 973.7  | 63.426  | 0.99963   | 8.61E-06  | 6.474    | 0.194 |
| NM_213910.1    | SERPINE1      | darkturquoise | lightyellow | 969.3  | 63.409  | 0.99957   | 1.06E-05  | 3.268    | --    |
| NM_214320.1    | CDKN3         | turquoise     | lightyellow | 922.4  | 62.634  | 0.9971    | 0.000187  | 8.312    | 99    |
| NM_214361.1    | MCL1          | green         | lightyellow | 1002   | 60.866  | 0.99123   | 0.000984  | 117.71   | 99    |
| AY609709.1     |               | red           | lightyellow | 974.2  | 62.842  | 0.9978    | 0.000124  | 51.864   | 99    |
| CF177183       |               | pink          | lightyellow | 803.2  | 57.382  | 0.97941   | 0.003535  | 2.34     | --    |
| BX668759       |               | blue          | lightyellow | 949.8  | 63.239  | 0.99905   | 3.52E-05  | 2.284    | --    |
| BX674823       |               | red           | lightyellow | 972.4  | 62.844  | 0.99779   | 0.000125  | 213.61   | 0.088 |
| BP143526       |               | lightgreen    | lightyellow | 922    | 62.638  | 0.99712   | 0.000185  | 10.42    | --    |
| CK454645       |               |               | lightyellow | 950.7  | 63.209  | 0.99895   | 4.06E-05  | 3.224    | 0     |
| CK455184       |               | turquoise     | lightyellow | 946.9  | 62.866  | 0.99788   | 0.000117  | 30.572   | --    |
| CK459204       |               | red           | lightyellow | 985    | 62.485  | 0.99658   | 0.00024   | 7.77     | --    |
| CK466682       |               | green         | lightyellow | 867.1  | 60.408  | 0.9898    | 0.001235  | 1.81     | --    |
| BX923234       |               | violet        | lightyellow | 975.8  | 63.198  | 0.9989    | 4.40E-05  | 2.946    | 0     |
| BX924202       |               | turquoise     | lightyellow | 911.8  | 61.765  | 0.99433   | 0.000512  | 24.158   | --    |
| CN156236       |               | darkturquoise | lightyellow | 998.9  | 60.821  | 0.99105   | 0.001014  | 1.902    | 99    |
| CN156513       |               | black         | lightyellow | 895.9  | 61.773  | 0.9943    | 0.000517  | 2.808    | --    |
| CN156728       |               | orange        | lightyellow | 946.9  | 63.283  | 0.99919   | 2.79E-05  | 3.548    | 0.791 |

|          |     |            |             |       |        |         |          |        |    |    |
|----------|-----|------------|-------------|-------|--------|---------|----------|--------|----|----|
| CN162101 |     | lightgreen | lightyellow | 989.5 | 62.4   | 0.99633 | 0.000267 | 9.964  | -- |    |
| CJ020677 |     | blue       | lightyellow | 965.2 | 63.034 | 0.99841 | 7.64E-05 | 9.104  | -- | 99 |
| DN101782 | HO2 | black      | lightyellow | 987   | 63.12  | 0.99862 | 6.13E-05 | 36.352 | -- | 0  |
| DN115314 |     | blue       | lightyellow | 903.8 | 61.238 | 0.99262 | 0.00076  | 31.58  | -- |    |
| DN116629 |     | green      | lightyellow | 1001  | 60.088 | 0.9886  | 0.001458 | 21.05  | -- |    |
| DN124718 |     | blue       | lightyellow | 893.4 | 61.425 | 0.99318 | 0.000676 | 7.096  | -- | 0  |
| AJ957573 |     | darkgrey   | lightyellow | 959.8 | 62.653 | 0.99721 | 0.000177 | 16.868 | -- |    |
| AJ963878 |     | pink       | lightyellow | 995   | 62.667 | 0.99715 | 0.000183 | 21.938 | -- |    |
| DV226247 |     | turquoise  | lightyellow | 941.4 | 63.218 | 0.99898 | 3.93E-05 | 17.05  | -- |    |
| DV227358 |     | blue       | lightyellow | 988.6 | 62.305 | 0.996   | 0.000304 | 4.494  | -- |    |
| DY406144 |     | black      | lightyellow | 838.6 | 58.937 | 0.98483 | 0.002238 | 7.842  | -- |    |
| EW038837 |     | pink       | lightyellow | 997   | 62.437 | 0.9964  | 0.00026  | 9.51   | -- |    |
| EW125499 |     | salmon     | lightyellow | 995.6 | 62.394 | 0.99628 | 0.000273 | 12.456 | -- | 0  |
| EW138865 |     | blue       | lightyellow | 951.9 | 63.243 | 0.99906 | 3.44E-05 | 10.402 | -- |    |
| EW148325 |     | white      | lightyellow | 931.8 | 62.944 | 0.9981  | 9.90E-05 | 11.978 | -- |    |
| EW190518 |     | blue       | lightyellow | 972.2 | 63.506 | 0.99988 | 1.62E-06 | 6.906  | -- |    |
| EW357862 |     | red        | lightyellow | 948.5 | 63.269 | 0.99914 | 3.02E-05 | 2.512  | -- |    |
| BI184060 |     | turquoise  | lightyellow | 977.5 | 62.999 | 0.99827 | 8.61E-05 | 3.126  | -- | 0  |
| BI401840 |     | pink       | lightyellow | 898.9 | 61.193 | 0.99246 | 0.000785 | 3.808  | -- |    |
| BQ604420 |     | turquoise  | lightyellow | 938   | 62.894 | 0.99796 | 0.000111 | 5.138  | -- |    |
| CA779520 |     | turquoise  | lightyellow | 941.8 | 63.23  | 0.99901 | 3.71E-05 | 3.244  | -- |    |

---

Table S11-6. Module eigengene and its evolutionary rates in 13 postnatal highly LT-specific modules (LT\_magenta).

| pig_Genebank   | pig_Gene     | LDEModule     | LT      |  | kTotal | kWithin | eigencorr | eigenpval | meanExpr | Ka/Ks  |
|----------------|--------------|---------------|---------|--|--------|---------|-----------|-----------|----------|--------|
|                |              |               | Module  |  |        |         |           |           |          |        |
| NM_001044606.1 | ATP5O        | darkgreen     | magenta |  | 258.99 | 71.063  | 0.96696   | 0.007175  | 315.914  | 0.1786 |
| AK230796.1     | PAFAH1B1     | tan           | magenta |  | 205.09 | 64.981  | 0.94872   | 0.013831  | 20.168   | --     |
| AK234327.1     | TSC22D1      | tan           | magenta |  | 265.18 | 81.917  | 0.99855   | 6.66E-05  | 26.018   | 99     |
| AK240551.1     | DAP          | darkred       | magenta |  | 267.87 | 75.429  | 0.9798    | 0.003435  | 6.328    | 99     |
| AK234571.1     | MRPL12       | darkred       | magenta |  | 262.22 | 81.949  | 0.99902   | 3.71E-05  | 93.782   | --     |
| AK234671.1     |              | pink          | magenta |  | 291.13 | 54.827  | 0.90937   | 0.032305  | 1.248    | --     |
| AK234756.1     |              | darkred       | magenta |  | 245.9  | 75.963  | 0.98149   | 0.003016  | 2.278    | --     |
| AK238051.1     | TOX          | salmon        | magenta |  | 242.79 | 75.517  | 0.97992   | 0.003404  | 0.838    | --     |
| AK238120.1     | LOC100130153 | paleturquoise | magenta |  | 261.54 | 82.224  | 0.99943   | 1.61E-05  | 4.538    | --     |
| AK235272.1     | PJA1         | paleturquoise | magenta |  | 231.13 | 65.183  | 0.94982   | 0.013392  | 1.936    | 0.2562 |
| AK232127.1     | MLF1         | lightcyan     | magenta |  | 242.59 | 74.195  | 0.9767    | 0.004253  | 72.732   | 0      |
| AK238391.1     |              | darkturquoise | magenta |  | 242.04 | 72.559  | 0.97141   | 0.005777  | 4.038    | --     |
| AK235604.1     | CMTM3        | tan           | magenta |  | 212.3  | 61.549  | 0.93631   | 0.019109  | 3.838    | --     |
| AK235806.1     | FUNDC2       | lightcyan     | magenta |  | 277.1  | 76.521  | 0.98333   | 0.002578  | 19.134   | 99     |
| AK235923.1     | COQ9         | darkmagenta   | magenta |  | 257.29 | 77.114  | 0.98658   | 0.001862  | 226.978  | 0      |
| AK236330.1     | ANXA4        | darkred       | magenta |  | 244.25 | 76.267  | 0.98213   | 0.00286   | 3.43     | 0.1941 |
| AK239272.1     | ADA          | grey          | magenta |  | 209.18 | 67.569  | 0.95573   | 0.011107  | 5.856    | 0.2632 |
| AK236398.1     | RNASEK       | salmon        | magenta |  | 266.63 | 79.591  | 0.99185   | 0.000882  | 7.458    | 0      |
| AK233669.1     | CABC1        | lightgreen    | magenta |  | 287.27 | 55.803  | 0.91327   | 0.03026   | 544.134  | 0      |
| AK233777.1     | LOC100291183 | violet        | magenta |  | 219.77 | 69.869  | 0.96232   | 0.008731  | 81.068   | --     |
| AK237193.1     | LOC100287741 | darkred       | magenta |  | 244.68 | 77.673  | 0.98623   | 0.001935  | 3.798    | --     |
| NM_001113439.1 | SFRS18       | lightcyan     | magenta |  | 275.29 | 78.413  | 0.98902   | 0.001379  | 48.158   | 99     |
| XM_001927231.1 | RAB13        | turquoise     | magenta |  | 253.79 | 75.148  | 0.97984   | 0.003426  | 4.618    | 0      |
| XM_001926198.1 | PFDN5        | salmon        | magenta |  | 271.36 | 77.114  | 0.98477   | 0.002251  | 27.72    | 0      |
| XM_001926121.1 | MRPL52       | salmon        | magenta |  | 250.58 | 77.127  | 0.98667   | 0.001843  | 14.434   | --     |
| XM_001927225.1 | COX17        | salmon        | magenta |  | 270.18 | 79.541  | 0.99262   | 0.00076   | 61.502   | --     |
| XM_001928724.1 | IFIT1L       | turquoise     | magenta |  | 241.04 | 76.36   | 0.98418   | 0.002383  | 21.684   | 0.6742 |
| XM_001927332.1 | AGA          | tan           | magenta |  | 207.81 | 64.009  | 0.94335   | 0.016047  | 3.6      | 0.4132 |
| AJ000786.1     | TMPRSS11F    | turquoise     | magenta |  | 279.57 | 73.639  | 0.97462   | 0.004835  | 29.632   | --     |
| NM_213898.1    | ACADS        | turquoise     | magenta |  | 259.29 | 77.199  | 0.98586   | 0.002014  | 92.02    | 0.1354 |
| NM_214116.1    | MGP          | turquoise     | magenta |  | 260.29 | 78.553  | 0.98885   | 0.00141   | 197.894  | 0      |
| NM_001001539.1 | AKR1B1       | turquoise     | magenta |  | 209.6  | 67.885  | 0.95726   | 0.010537  | 63.718   | 0      |
| AY609804.1     | VMA21        | darkred       | magenta |  | 252.73 | 77.373  | 0.9855    | 0.002092  | 4.536    | 99     |
| AY610147.1     | LOC730107    | turquoise     | magenta |  | 270.75 | 78.867  | 0.99078   | 0.001061  | 6.68     | 99     |
| AY610185.1     | HSPB11       | turquoise     | magenta |  | 293.5  | 52.487  | 0.89965   | 0.037579  | 0.968    | 99     |
| NM_001009582.1 | STMN1        | magenta       | magenta |  | 225.92 | 68.122  | 0.95772   | 0.010369  | 19.554   | 99     |
| NM_001008689.2 | SAR1B        | tan           | magenta |  | 198.34 | 62.273  | 0.93748   | 0.01859   | 116.54   | 99     |
| BX666142       |              | salmon        | magenta |  | 248.97 | 77.198  | 0.98512   | 0.002173  | 5.668    | 99     |
| BX666730       |              | salmon        | magenta |  | 277.62 | 54.522  | 0.90976   | 0.032096  | 7.496    | --     |
| BX667181       |              | tan           | magenta |  | 257.88 | 75.766  | 0.98118   | 0.003091  | 2.776    | --     |
| BX670664       |              | tan           | magenta |  | 223.92 | 71.255  | 0.96892   | 0.006547  | 17.684   | --     |
| BX675880       |              | black         | magenta |  | 264.27 | 79.37   | 0.99134   | 0.000967  | 13.762   | --     |
| BX675945       |              | tan           | magenta |  | 245.27 | 77.152  | 0.98515   | 0.002168  | 23.61    | --     |
| BX676412       |              | darkred       | magenta |  | 255.92 | 78.57   | 0.98894   | 0.001395  | 12.678   | --     |
| BX915349       |              | paleturquoise | magenta |  | 243.34 | 78.852  | 0.99043   | 0.001123  | 2.286    | --     |
| BX921221       |              | salmon        | magenta |  | 209.63 | 65.314  | 0.95019   | 0.013245  | 51.11    | --     |

|          |          |               |         |        |        |         |          |        |        |    |
|----------|----------|---------------|---------|--------|--------|---------|----------|--------|--------|----|
| BX923253 |          | orange        | magenta | 239.89 | 78.093 | 0.98829 | 0.001519 | 7.222  | --     |    |
| BX923548 |          | lightgreen    | magenta | 280.66 | 74.67  | 0.9776  | 0.004012 | 13.41  | 0.2026 |    |
| BX923655 |          | darkred       | magenta | 292.84 | 56.822 | 0.91683 | 0.028431 | 42.864 | --     |    |
| CN162158 |          | tan           | magenta | 223.89 | 70.383 | 0.96394 | 0.008175 | 3.984  | --     |    |
| CN162187 |          | tan           | magenta | 289.25 | 51.566 | 0.89639 | 0.039409 | 22.016 |        | 0  |
| AJ656502 |          | salmon        | magenta | 207.79 | 64.126 | 0.94703 | 0.014517 | 3.676  | --     |    |
| AJ657091 |          | tan           | magenta | 196.4  | 60.193 | 0.93233 | 0.020914 | 1.58   |        | 0  |
| CJ011098 |          | orange        | magenta | 183.83 | 55.715 | 0.91807 | 0.027802 | 2.878  | --     |    |
| DN101483 |          | salmon        | magenta | 242.62 | 78.775 | 0.99038 | 0.001131 | 5.924  | --     |    |
| DN108333 |          | brown         | magenta | 238.51 | 56.776 | 0.92188 | 0.0259   | 26.986 | --     |    |
| DN115959 |          | turquoise     | magenta | 273.72 | 75.891 | 0.98233 | 0.002813 | 3.594  |        | 0  |
| DN121893 |          | darkmagenta   | magenta | 273.23 | 78.01  | 0.9875  | 0.001675 | 6.886  |        | 99 |
| DN124126 |          | tan           | magenta | 203.3  | 59.878 | 0.93421 | 0.020058 | 9.714  | --     |    |
| DN125721 |          | paleturquoise | magenta | 269.68 | 80.472 | 0.99508 | 0.000413 | 4.248  | --     |    |
| DN128580 |          | salmon        | magenta | 261.78 | 75.417 | 0.98083 | 0.003176 | 60.152 | --     |    |
| DN132970 |          | paleturquoise | magenta | 265.41 | 79.488 | 0.99276 | 0.000739 | 9.304  | --     |    |
| BW981299 |          | turquoise     | magenta | 242.14 | 77.955 | 0.9871  | 0.001755 | 4.032  | --     |    |
| BW982846 |          | turquoise     | magenta | 259.62 | 82.211 | 0.99966 | 7.69E-06 | 3.018  | --     |    |
| AJ964366 |          | skyblue       | magenta | 226.28 | 73.917 | 0.97582 | 0.004496 | 7.472  | --     |    |
| AJ944603 |          | turquoise     | magenta | 275.29 | 76.69  | 0.98383 | 0.002462 | 7.172  | --     |    |
| AJ946247 |          | tan           | magenta | 211.28 | 62.506 | 0.94201 | 0.016615 | 6.202  | --     |    |
| CV876445 |          | turquoise     | magenta | 246.81 | 77.523 | 0.98579 | 0.00203  | 4.09   | --     |    |
| DY424635 |          | tan           | magenta | 297.23 | 51.124 | 0.89351 | 0.04104  | 11.138 |        | 0  |
| DB809172 |          | purple        | magenta | 190.66 | 60.554 | 0.93298 | 0.020616 | 3.526  | --     |    |
| DB803157 |          | tan           | magenta | 240.61 | 75.268 | 0.97965 | 0.003475 | 38.758 | --     |    |
| AK230483 | HLA-DQA1 | yellow        | magenta | 208.3  | 66.246 | 0.95204 | 0.012517 | 20.37  | --     |    |
| ES447306 |          | navy          | magenta | 178.69 | 55.681 | 0.9162  | 0.028751 | 6.522  | --     |    |
| EV857330 |          | darkred       | magenta | 270.25 | 81.005 | 0.99605 | 0.000298 | 5.576  | --     |    |
| EV937609 |          | darkred       | magenta | 249.65 | 76.957 | 0.98422 | 0.002373 | 7.066  | --     |    |
| EW136988 |          | turquoise     | magenta | 269.66 | 79.819 | 0.99253 | 0.000775 | 3.846  | --     |    |
| EW164912 |          | turquoise     | magenta | 268.12 | 78.275 | 0.98933 | 0.00132  | 10.326 | --     |    |
| EW190207 |          | turquoise     | magenta | 228.78 | 73.669 | 0.97607 | 0.004428 | 5.154  | --     |    |
| EW201887 |          | tan           | magenta | 270.71 | 79.867 | 0.99343 | 0.000639 | 2.862  | --     |    |
| EW206037 |          | paleturquoise | magenta | 248.66 | 79.409 | 0.99124 | 0.000983 | 4.032  | --     |    |
| EW235079 |          | darkgreen     | magenta | 268.98 | 78.173 | 0.98777 | 0.001621 | 9.29   | --     |    |
| EW238451 |          | darkred       | magenta | 207.42 | 66.675 | 0.95231 | 0.012413 | 35.978 | --     |    |
| EW266485 |          | salmon        | magenta | 199.62 | 59.305 | 0.93172 | 0.021199 | 2.352  |        | 0  |
| EW299345 |          | tan           | magenta | 211.25 | 68.017 | 0.95655 | 0.0108   | 11.046 | --     |    |
| EW328139 |          | turquoise     | magenta | 276.1  | 77.489 | 0.98639 | 0.001901 | 10.106 | --     |    |
| EW336642 |          | salmon        | magenta | 224.56 | 70.856 | 0.9686  | 0.006648 | 0.692  | --     |    |
| EW363654 |          | darkred       | magenta | 260.64 | 80.724 | 0.99501 | 0.000423 | 16.542 | --     |    |
| EW521970 |          | darkred       | magenta | 270.14 | 79.291 | 0.99196 | 0.000865 | 6.026  | --     |    |
| EW572865 |          | paleturquoise | magenta | 267.95 | 81.61  | 0.99802 | 0.000106 | 59.074 |        | 99 |
| EW588646 |          | turquoise     | magenta | 267.63 | 78.868 | 0.98976 | 0.001242 | 6.788  | --     |    |
| BE233738 |          | darkred       | magenta | 257.81 | 81.97  | 0.99907 | 3.39E-05 | 16.552 | --     |    |
| BF192577 |          | salmon        | magenta | 261.94 | 82.241 | 0.99951 | 1.31E-05 | 1.798  | --     |    |
| BI400195 |          | paleturquoise | magenta | 266.6  | 80.535 | 0.99466 | 0.000468 | 16.77  | --     |    |
| BI182553 |          | lightcyan     | magenta | 270.94 | 78.597 | 0.98927 | 0.001333 | 45.654 | --     |    |
| BI184334 |          | pink          | magenta | 259.4  | 79.604 | 0.99183 | 0.000886 | 7.264  | --     |    |
| BM190542 |          | darkred       | magenta | 239.22 | 75.524 | 0.97998 | 0.003391 | 2.596  | --     |    |



Table S11-7. Module eigengene and its evolutionary rates in 13 postnatal highly LT-specific modules (LT\_orange).

| pig_Genebank   | pig_Gene | LDEModule     | LT     |        | eigencorr | eigenpval | meanExpr | Ka/Ks   |        |
|----------------|----------|---------------|--------|--------|-----------|-----------|----------|---------|--------|
|                |          |               | Module | kTotal |           |           |          |         |        |
| AK240479.1     | UBAC1    | grey60        | orange | 286.3  | 30.853    | 0.968767  | 0.006595 | 213.696 | --     |
| AK238619.1     | PNRC1    | tan           | orange | 348.3  | 22.108    | 0.896843  | 0.039151 | 92.03   | --     |
| AK235913.1     | FHOD1    | purple        | orange | 506.3  | 34.053    | 0.989849  | 0.001226 | 96.458  | 1.2135 |
| AK238961.1     | AES      | blue          | orange | 330    | 32.466    | 0.977855  | 0.003943 | 100.144 | --     |
| AK239070.1     | MED24    | violet        | orange | 463.1  | 35.113    | 0.996433  | 0.000256 | 11.86   | --     |
| AK230500.1     | DAZAP2   | turquoise     | orange | 594.1  | 31.175    | 0.968266  | 0.006754 | 24.222  | 99     |
| AK239729.1     | TMEM100  | yellow        | orange | 476.6  | 30.684    | 0.964257  | 0.008068 | 10.526  | 0      |
| AK232969.1     | CLASP1   | salmon        | orange | 385.8  | 35.434    | 0.997503  | 0.00015  | 40.374  | --     |
| AK240094.1     | HYI      | lightcyan     | orange | 555.4  | 33.87     | 0.988008  | 0.001574 | 25.912  | 0      |
| AK233469.1     | AARSD1   | lightcyan     | orange | 432.7  | 16.904    | 0.835546  | 0.078053 | 15.358  | --     |
| AK240159.1     | CALCOCO2 | navy          | orange | 440.1  | 35.171    | 0.99603   | 0.0003   | 20.988  | 0.0832 |
| AK237308.1     | ATP6AP1  | green         | orange | 392.1  | 33.206    | 0.983461  | 0.002547 | 18.28   | --     |
| NM_001078687.1 | SMPX     | darkgrey      | orange | 347    | 34.366    | 0.989057  | 0.001372 | 173.502 | --     |
| NM_001113698.1 | TH1L     | lightcyan     | orange | 242    | 28.66     | 0.947785  | 0.01421  | 52.258  | 99     |
| XM_001927866.1 | RAD23B   | darkgreen     | orange | 476.6  | 33.559    | 0.987032  | 0.001769 | 81.928  | 99     |
| XM_001926740.1 | MFSD3    | darkgreen     | orange | 568.2  | 33.017    | 0.982011  | 0.002888 | 4.98    | 0      |
| XM_001928014.1 | GMPR2    | red           | orange | 349.5  | 31.623    | 0.970099  | 0.006179 | 15.852  | 99     |
| XM_001924615.1 | PDLIM1   | darkorange    | orange | 352.6  | 33.225    | 0.980918  | 0.003155 | 23.942  | 0      |
| NM_214188.1    | DDOST    | green         | orange | 207.2  | 25.723    | 0.921092  | 0.026291 | 12.904  | 0      |
| NM_214342.1    | OXSRI    | yellow        | orange | 402.6  | 32.081    | 0.97294   | 0.005322 | 13.848  | 0      |
| AY609689.1     | FH       | yellow        | orange | 561.1  | 29.165    | 0.955172  | 0.011317 | 95.278  | 0.1362 |
| AY609883.1     | MRPL48   | salmon        | orange | 301.8  | 30.386    | 0.966355  | 0.007371 | 3.552   | 0      |
| AY610193.1     | C7orf30  | turquoise     | orange | 625.6  | 24.467    | 0.915192  | 0.029268 | 49.146  | --     |
| BX666495       |          | white         | orange | 562.4  | 32.565    | 0.97801   | 0.003902 | 27.218  | --     |
| BX671690       |          | greenyellow   | orange | 504.5  | 34.118    | 0.990385  | 0.00113  | 3.518   | --     |
| CK460216       |          | brown         | orange | 572.6  | 32.957    | 0.98225   | 0.002831 | 91.478  | --     |
| BX926121       |          | grey60        | orange | 278.9  | 29.627    | 0.960506  | 0.009366 | 25.64   | --     |
| CN156363       |          | turquoise     | orange | 544.8  | 31.576    | 0.971464  | 0.005762 | 7.918   | --     |
| CN156474       |          | purple        | orange | 303.9  | 32.472    | 0.978354  | 0.00381  | 11.562  | --     |
| DN115916       |          | blue          | orange | 453.6  | 32.897    | 0.980664  | 0.003218 | 20.672  | --     |
| BW960627       |          | yellow        | orange | 599.7  | 26.661    | 0.934699  | 0.019834 | 5.88    | --     |
| BW974788       |          | blue          | orange | 391    | 17.194    | 0.839191  | 0.075515 | 34.6    | 0      |
| AJ946843       |          | white         | orange | 640.4  | 31.432    | 0.97064   | 0.006012 | 89.226  | --     |
| AJ954153       |          | darkgreen     | orange | 279.7  | 29.562    | 0.955675  | 0.011128 | 34.946  | --     |
| DV901297       |          | white         | orange | 442    | 34.596    | 0.991154  | 0.000997 | 59.002  | --     |
| DY414301       |          | turquoise     | orange | 650.1  | 30.38     | 0.962648  | 0.008617 | 5.164   | --     |
| EV890051       |          | yellow        | orange | 527    | 31.024    | 0.966417  | 0.00735  | 229.574 | 99     |
| EV933515       |          | orange        | orange | 217.1  | 27.237    | 0.935977  | 0.019258 | 31.512  | --     |
| EW041986       |          | blue          | orange | 245.6  | 29.163    | 0.954676  | 0.011504 | 106.666 | --     |
| EW179701       |          | darkturquoise | orange | 248.4  | 29.012    | 0.948873  | 0.013771 | 4.096   | --     |
| EW270439       |          | darkred       | orange | 238.4  | 27.208    | 0.940764  | 0.017152 | 16.836  | --     |
| EW299585       |          | purple        | orange | 361.1  | 30.836    | 0.967156  | 0.00711  | 31.968  | --     |
| EW362700       |          | darkorange    | orange | 261.6  | 30.635    | 0.965324  | 0.007711 | 91.89   | --     |
| BI181072       |          | darkorange    | orange | 356    | 34.935    | 0.994348  | 0.00051  | 8.376   | --     |

Table S11-8. Module eigengene and its evolutionary rates in 13 postnatal highly LT-specific modules (LT\_red).

| pig_Genebank   | pig_Gene  | LDEModule     | LT     |  | kTotal | kWithin | eigencorr | eigenpval | meanExpr | Ka/Ks  |
|----------------|-----------|---------------|--------|--|--------|---------|-----------|-----------|----------|--------|
|                |           |               | Module |  |        |         |           |           |          |        |
| AK237425.1     | AOC3      | yellow        | red    |  | 329.59 | 73.6241 | 0.91096   | 0.031465  | 22.494   | --     |
| AK230890.1     | UBA3      | yellow        | red    |  | 616.99 | 93.5819 | 0.963067  | 0.008473  | 43.102   | --     |
| AK234461.1     | LUC7L3    | brown         | red    |  | 465.53 | 82.7269 | 0.935321  | 0.019553  | 133.084  | 0.5285 |
| AK240575.1     | C11orf58  | turquoise     | red    |  | 606.59 | 105.49  | 0.989104  | 0.001363  | 34.718   | 99     |
| AK231197.1     | RPL36     | purple        | red    |  | 543.03 | 109.199 | 0.996743  | 0.000223  | 290.914  | 99     |
| AK234577.1     | TFSM      | turquoise     | red    |  | 679.79 | 101.592 | 0.980033  | 0.003377  | 38.958   | --     |
| AK231558.1     | UQCRFS1   | turquoise     | red    |  | 631.66 | 105.145 | 0.987978  | 0.001579  | 659.306  | 0.5812 |
| AK231604.1     | LAP3      | navy          | red    |  | 623.11 | 93.4894 | 0.961142  | 0.009141  | 59.15    | 0      |
| AK235252.1     | MRPS35    | blue          | red    |  | 449.39 | 83.2272 | 0.936758  | 0.018909  | 19.668   | 0.3859 |
| AK235434.1     | EIF1B     | turquoise     | red    |  | 381.56 | 91.2418 | 0.957197  | 0.010562  | 37.732   | 99     |
| AK235564.1     | PRMT7     | tan           | red    |  | 444.17 | 100.375 | 0.97825   | 0.003838  | 14.096   | 0.2927 |
| AK231959.1     | CRIP2     | blue          | red    |  | 478.43 | 105.566 | 0.989193  | 0.001347  | 34.546   | --     |
| AK235782.1     | RABAC1    | grey60        | red    |  | 382.26 | 90.5215 | 0.956063  | 0.010982  | 61.082   | --     |
| AK232557.1     | CAST      | purple        | red    |  | 392.11 | 78.9708 | 0.926014  | 0.023888  | 10.42    | --     |
| AK236065.1     | RAB14     | brown         | red    |  | 550.68 | 87.8012 | 0.948398  | 0.013962  | 29.51    | 99     |
| AK239106.1     | CRKL      | salmon        | red    |  | 449.26 | 102.112 | 0.982038  | 0.002882  | 60.56    | --     |
| AK230559.1     | PICALM    | lightcyan     | red    |  | 346.83 | 77.0967 | 0.919953  | 0.026858  | 56.238   | 99     |
| AK239509.1     | PECR      | turquoise     | red    |  | 325.57 | 78.5902 | 0.925755  | 0.024013  | 23.264   | 99     |
| AK239646.1     | HADHB     | turquoise     | red    |  | 482.86 | 109.288 | 0.996928  | 0.000204  | 236.196  | 0      |
| AK239728.1     | DNAJB6    | purple        | red    |  | 624.36 | 95.2383 | 0.965279  | 0.007726  | 43.712   | 99     |
| AK233231.1     | NDUFS8    | blue          | red    |  | 370.88 | 85.7884 | 0.944304  | 0.015646  | 311.794  | --     |
| AK240107.1     | MAP4      | grey60        | red    |  | 641.9  | 104.038 | 0.985272  | 0.002141  | 133.064  | --     |
| AK237044.1     | UBE2Z     | tan           | red    |  | 559.96 | 100.913 | 0.979278  | 0.00357   | 10.674   | 0      |
| AK237106.1     | SLC25A12  | green         | red    |  | 424.67 | 102.223 | 0.982534  | 0.002764  | 32.406   | 99     |
| AK240181.1     | MAP1LC3A  | darkred       | red    |  | 513.6  | 104.742 | 0.987693  | 0.001636  | 183.398  | 99     |
| AB292846.1     | NME1-NME2 | purple        | red    |  | 425.36 | 98.1751 | 0.973615  | 0.005124  | 12.65    | --     |
| NM_001097426.1 | DDO       | turquoise     | red    |  | 587.27 | 108.998 | 0.996158  | 0.000286  | 12.292   | 0.177  |
| NM_001097486.1 | ATPIF1    | yellow        | red    |  | 565.85 | 108.747 | 0.995612  | 0.000349  | 67.136   | 99     |
| NM_001097469.1 | HIGD2A    | darkturquoise | red    |  | 311.97 | 75.8018 | 0.918038  | 0.027819  | 66.77    | 0.6964 |
| NM_001097435.1 | P4HA1     | royalblue     | red    |  | 480.02 | 93.4772 | 0.962145  | 0.008791  | 26.816   | 0.7591 |
| NM_001113287.1 | LDHB      | navy          | red    |  | 699.32 | 94.7022 | 0.96406   | 0.008135  | 221.662  | 0      |
| XM_001926626.1 | C9orf123  | blue          | red    |  | 598.45 | 105.59  | 0.989447  | 0.001299  | 9.484    | --     |
| XM_001926549.1 | FERMT2    | black         | red    |  | 446.89 | 103.026 | 0.984366  | 0.002341  | 95.66    | 0      |
| XM_001929410.1 | ATP5B     | greenyellow   | red    |  | 484.87 | 109.634 | 0.997698  | 0.000133  | 867.136  | 0      |
| XM_001925445.1 | KIAA0528  | blue          | red    |  | 539.77 | 107.228 | 0.992871  | 0.000722  | 21.686   | --     |
| XM_001927180.1 | ATP6V1E1  | purple        | red    |  | 442.15 | 103.4   | 0.984878  | 0.002227  | 18.88    | 0      |
| XM_001928042.1 | MED6      | turquoise     | red    |  | 632.6  | 99.4023 | 0.975238  | 0.00466   | 19.136   | 99     |
| XM_001926123.1 | GSTZ1     | turquoise     | red    |  | 323.19 | 74.4386 | 0.91451   | 0.029618  | 9.818    | 99     |
| XM_001929246.1 | MRPL2     | turquoise     | red    |  | 682.04 | 101.288 | 0.979307  | 0.003562  | 23.744   | 0.0637 |
| XM_001927338.1 | IDH3A     | blue          | red    |  | 647.64 | 100.761 | 0.9789    | 0.003668  | 221.372  | 0.176  |
| XM_001925339.1 | COL21A1   | turquoise     | red    |  | 408.08 | 86.1942 | 0.944252  | 0.015668  | 8.666    | --     |
| XM_001926876.1 | IFT122    | tan           | red    |  | 489.41 | 107.95  | 0.994444  | 0.000497  | 4.638    | 99     |
| XM_001929335.1 | TAF5      | grey60        | red    |  | 593.3  | 101.317 | 0.979378  | 0.003544  | 15.932   | --     |
| XM_001928978.1 | CASP7     | darkorange    | red    |  | 479.75 | 96.167  | 0.96854   | 0.006667  | 12.256   | --     |

|                |          |               |     |        |         |          |          |         |        |
|----------------|----------|---------------|-----|--------|---------|----------|----------|---------|--------|
| XM_001925275.1 | DDIT4    | tan           | red | 450.2  | 101.938 | 0.981368 | 0.003044 | 54.314  | --     |
| XM_001928504.1 | GATC     | grey60        | red | 637.62 | 93.9335 | 0.963267 | 0.008405 | 6.454   | 99     |
| XM_001929273.1 | C22orf13 | turquoise     | red | 669.42 | 100.972 | 0.979248 | 0.003577 | 31.996  | 99     |
| XM_001929590.1 | KLHL22   | grey60        | red | 371.73 | 70.8624 | 0.904606 | 0.034858 | 7.736   | --     |
| XM_001925965.1 | APOOL    | darkorange    | red | 517.9  | 110.213 | 0.998648 | 5.97E-05 | 11.792  | 0.3466 |
| AY374470.1     | ETFB     | turquoise     | red | 429.7  | 104.559 | 0.98737  | 0.001701 | 49.288  | 0      |
| AJ236938.1     | LUC7L3   | turquoise     | red | 322.92 | 73.65   | 0.909887 | 0.03203  | 32.97   | --     |
| NM_213923.1    | APEH     | turquoise     | red | 656.26 | 93.0536 | 0.96008  | 0.009517 | 14.528  | 0.0766 |
| NM_213896.1    | ACY1     | turquoise     | red | 460.85 | 98.1623 | 0.97281  | 0.00536  | 27.86   | 0.1093 |
| NM_214049.1    | UCP3     | lightgreen    | red | 441.02 | 103.799 | 0.985737 | 0.00204  | 15.944  | 0.0618 |
| NM_214189.1    | INHA     | pink          | red | 452.42 | 94.2537 | 0.963846 | 0.008207 | 11.114  | 0      |
| NM_214204.1    | PKIA     | grey60        | red | 436.05 | 105.77  | 0.989858 | 0.001224 | 313.884 | --     |
| NM_001001645.1 | C19orf56 | darkred       | red | 378.69 | 95.1264 | 0.96655  | 0.007307 | 51.248  | 99     |
| AY609477.1     | MRPS36   | royalblue     | red | 521.47 | 110.738 | 0.999778 | 3.97E-06 | 71.29   | --     |
| AY609572.1     | NDUFC2   | white         | red | 560.59 | 105.907 | 0.990061 | 0.001188 | 121.252 | --     |
| AY609726.1     | ARF6     | purple        | red | 530.31 | 100.536 | 0.978045 | 0.003892 | 4.632   | 0      |
| AY609765.1     | NDUFV1   | lightcyan     | red | 427.69 | 103.805 | 0.985589 | 0.002072 | 26.416  | 0      |
| AY610069.1     | ACOT13   | turquoise     | red | 401.96 | 82.3605 | 0.93502  | 0.019689 | 28.168  | 99     |
| AY610163.1     | IFRD1    | turquoise     | red | 470.56 | 77.574  | 0.922135 | 0.025775 | 9.598   | 0      |
| CF787137       |          | darkorange    | red | 485.94 | 109.702 | 0.997756 | 0.000128 | 315.204 | 99     |
| BX668263       |          | paleturquoise | red | 479.44 | 109.246 | 0.996839 | 0.000213 | 9.21    | --     |
| BX668638       |          | turquoise     | red | 397.93 | 99.0413 | 0.975632 | 0.00455  | 9.722   | --     |
| BX675592       |          | grey60        | red | 447.53 | 98.066  | 0.973202 | 0.005245 | 18.298  | --     |
| BX675898       |          | blue          | red | 486.25 | 97.5362 | 0.971671 | 0.005699 | 15.994  | 99     |
| BX676378       |          | purple        | red | 554.65 | 91.8124 | 0.957564 | 0.010427 | 68.984  | 99     |
| BP440567       |          | pink          | red | 725.44 | 90.8548 | 0.955142 | 0.011328 | 16.234  | 99     |
| BP142174       |          | turquoise     | red | 409.04 | 101.359 | 0.980497 | 0.00326  | 427.76  | --     |
| BP144484       |          | darkgrey      | red | 487.21 | 98.5013 | 0.973584 | 0.005133 | 16.992  | 0.4075 |
| CK452952       |          | turquoise     | red | 564.93 | 103.625 | 0.985555 | 0.00208  | 34.46   | --     |
| CK453720       |          | turquoise     | red | 401.85 | 93.7076 | 0.962638 | 0.00862  | 62.898  | --     |
| CK454638       |          | yellow        | red | 563.83 | 99.4294 | 0.975781 | 0.004508 | 6.744   | --     |
| CK457989       |          | turquoise     | red | 459.83 | 106.64  | 0.991624 | 0.000919 | 8.6     | --     |
| CK462660       |          | navy          | red | 426.65 | 77.6273 | 0.924527 | 0.024606 | 14.42   | 0      |
| CK463770       |          | turquoise     | red | 605.9  | 103.143 | 0.983653 | 0.002503 | 29.272  | --     |
| CK467191       |          | darkorange    | red | 601.14 | 107.319 | 0.992532 | 0.000774 | 31.366  | --     |
| BX914725       |          | turquoise     | red | 750.7  | 79.3313 | 0.925022 | 0.024366 | 18.394  | --     |
| BX916011       |          | turquoise     | red | 517.94 | 100.679 | 0.978627 | 0.003739 | 15.772  | --     |
| BX917182       |          | skyblue       | red | 244.78 | 50.3855 | 0.834315 | 0.078915 | 15.136  | --     |
| BX917819       |          | lightgreen    | red | 394.02 | 93.6763 | 0.962616 | 0.008628 | 21.986  | --     |
| BX921896       |          | turquoise     | red | 488.58 | 103.706 | 0.985829 | 0.002021 | 29.382  | --     |
| BX923516       |          | darkgreen     | red | 637.39 | 105.657 | 0.988864 | 0.001408 | 14.896  | --     |
| BX926350       |          | brown         | red | 360.52 | 85.557  | 0.944172 | 0.015702 | 21.374  | --     |
| CN155050       |          | grey60        | red | 434.85 | 87.085  | 0.948091 | 0.014086 | 2.716   | --     |
| CN158322       |          | darkturquoise | red | 370.85 | 92.244  | 0.960202 | 0.009474 | 30.29   | --     |
| CN162142       |          | darkgreen     | red | 302.91 | 73.2572 | 0.909929 | 0.032008 | 6.092   | --     |
| CN162202       |          | turquoise     | red | 402.97 | 76.2983 | 0.917639 | 0.02802  | 45.622  | --     |
| CN165277       |          | turquoise     | red | 537.88 | 105.493 | 0.989306 | 0.001325 | 16.796  | --     |
| AJ656748       |          | grey60        | red | 573.43 | 93.1993 | 0.962492 | 0.008671 | 69.23   | --     |

|          |               |     |        |         |          |          |         |    |
|----------|---------------|-----|--------|---------|----------|----------|---------|----|
| CJ011361 | turquoise     | red | 395.88 | 95.8181 | 0.967765 | 0.006914 | 28.666  | 0  |
| CJ026063 | turquoise     | red | 716.54 | 83.6792 | 0.93745  | 0.018602 | 69.234  | -- |
| CJ026797 | tan           | red | 423.38 | 103.968 | 0.986109 | 0.001961 | 7.682   | -- |
| CJ028952 | orange        | red | 591.58 | 108.179 | 0.994256 | 0.000522 | 12.628  | -- |
| DN102168 | navy          | red | 604.02 | 108.616 | 0.995202 | 0.000399 | 32.576  | -- |
| DN102235 | darkturquoise | red | 525.87 | 84.9376 | 0.940583 | 0.01723  | 25.016  | 0  |
| DN104419 | lightgreen    | red | 666.12 | 97.5145 | 0.970798 | 0.005964 | 11.232  | 0  |
| DN104456 | purple        | red | 433.04 | 102.649 | 0.983362 | 0.00257  | 129.166 | -- |
| DN111525 | purple        | red | 421.42 | 103.336 | 0.984821 | 0.00224  | 118.48  | -- |
| DN116503 | purple        | red | 447.41 | 103.547 | 0.985149 | 0.002168 | 27.022  | -- |
| DN124866 | darkred       | red | 666.07 | 101.38  | 0.980003 | 0.003384 | 11.522  | -- |
| DN125939 | grey60        | red | 420.54 | 92.8566 | 0.961251 | 0.009103 | 22.928  | 0  |
| AJ950507 | turquoise     | red | 386.67 | 94.6126 | 0.965803 | 0.007552 | 30.218  | -- |
| AJ960206 | pink          | red | 657.98 | 102.813 | 0.983227 | 0.002601 | 23.76   | -- |
| AJ962054 | salmon        | red | 383.6  | 96.044  | 0.968726 | 0.006608 | 0.208   | -- |
| AJ962420 | purple        | red | 405.48 | 97.955  | 0.973189 | 0.005249 | 1.802   | -- |
| AJ962558 | darkgreen     | red | 596.44 | 84.2782 | 0.940463 | 0.017282 | 13.32   | -- |
| DV227364 | turquoise     | red | 446.83 | 106.448 | 0.991246 | 0.000982 | 26.994  | -- |
| DV229656 | grey60        | red | 430.97 | 87.0908 | 0.947458 | 0.014343 | 10.864  | 99 |
| CX064653 | midnightblue  | red | 709.07 | 95.0023 | 0.965042 | 0.007805 | 14.768  | -- |
| DY411595 | darkturquoise | red | 367.58 | 90.0479 | 0.954672 | 0.011506 | 56.602  | 99 |
| DY415294 | pink          | red | 619.79 | 94.6898 | 0.966136 | 0.007443 | 31.94   | -- |
| EV898729 | midnightblue  | red | 596.26 | 90.6615 | 0.95469  | 0.011499 | 7.282   | -- |
| EV984595 | purple        | red | 713.27 | 95.4905 | 0.96597  | 0.007497 | 105.844 | -- |
| EW079103 | darkred       | red | 475.48 | 101.101 | 0.979654 | 0.003473 | 40.432  | -- |
| EW176591 | purple        | red | 686.16 | 88.4297 | 0.949087 | 0.013685 | 1.022   | -- |
| EW198996 | darkturquoise | red | 532.46 | 96.4782 | 0.968776 | 0.006592 | 33.782  | -- |
| EW239364 | turquoise     | red | 525.06 | 106.059 | 0.990126 | 0.001176 | 30.402  | -- |
| EW252113 | grey60        | red | 663.29 | 102.703 | 0.982978 | 0.002659 | 9.24    | -- |
| EW333024 | pink          | red | 531.29 | 105.368 | 0.9884   | 0.001497 | 31.924  | -- |
| EW366014 | white         | red | 626.7  | 106.154 | 0.989897 | 0.001217 | 33.57   | -- |
| EW373211 | grey60        | red | 695.67 | 85.0005 | 0.939973 | 0.017495 | 5.178   | -- |
| EW421594 | turquoise     | red | 451.05 | 105.806 | 0.989923 | 0.001213 | 91.6    | 99 |
| EW495920 | paleturquoise | red | 509.01 | 109.994 | 0.998444 | 7.37E-05 | 247.67  | 0  |
| EW671244 | yellow        | red | 294.42 | 68.5054 | 0.895663 | 0.039817 | 8.572   | -- |
| AW414891 | blue          | red | 485.6  | 98.9288 | 0.974597 | 0.004842 | 16.726  | -- |
| BI182094 | tan           | red | 405.65 | 87.2187 | 0.948022 | 0.014114 | 12.152  | -- |
| BI183745 | pink          | red | 534.03 | 109.18  | 0.996669 | 0.000231 | 1.434   | -- |
| BI402468 | pink          | red | 563.78 | 98.8987 | 0.975267 | 0.004652 | 7.304   | -- |

Table S11-9. Module eigengene and its evolutionary rates in 13 postnatal highly LT-specific modules (LT\_sienna3).

| pig_Genebank   | pig_Gene | LT          |         | kTotal | kWithin | eigencorr | eigenpval | meanExpr | Ka/Ks |
|----------------|----------|-------------|---------|--------|---------|-----------|-----------|----------|-------|
|                |          | LDEModule   | Module  |        |         |           |           |          |       |
| AK230724.1     | MTHFD2   | turquoise   | sienna3 | 885.06 | 25.0755 | 0.99184   | 0.000884  | 23.766   | 99    |
| AK235285.1     | HDLBP    | brown       | sienna3 | 996.32 | 25.4324 | 0.994685  | 0.000465  | 116.038  | --    |
| AK238947.1     | FSTL4    | pink        | sienna3 | 927.54 | 23.1195 | 0.976321  | 0.004358  | 2.134    | --    |
| AK236153.1     | C1QBP    | turquoise   | sienna3 | 972.74 | 25.8454 | 0.997887  | 0.000117  | 138.358  | --    |
| AK236404.1     | HNRNPUL1 | yellow      | sienna3 | 965.83 | 25.9492 | 0.998704  | 5.60E-05  | 26.816   | 99    |
| AK239524.1     | FKBP5    | lightgreen  | sienna3 | 962.5  | 25.9292 | 0.998554  | 6.60E-05  | 55.616   | --    |
| AK239677.1     | WIPI2    | blue        | sienna3 | 989.72 | 25.9517 | 0.998669  | 5.83E-05  | 28.858   | 0     |
| AK236724.1     | TSSC1    | turquoise   | sienna3 | 983.06 | 25.8549 | 0.99793   | 0.000113  | 14.646   | 0     |
| NM_001001546.2 | MBP      | lightgreen  | sienna3 | 779.99 | 22.7133 | 0.972174  | 0.005549  | 5.35     | --    |
| XM_001928451.1 | KLF10    | navy        | sienna3 | 971.22 | 23.2389 | 0.976713  | 0.004251  | 15.93    | 0.431 |
| XM_001925495.1 | GPHN     | salmon      | sienna3 | 919.34 | 25.633  | 0.996229  | 0.000278  | 18.714   | 0     |
| XM_001926227.1 | PSMA4    | turquoise   | sienna3 | 995.97 | 25.364  | 0.994064  | 0.000549  | 82.714   | 0     |
| XM_001926112.1 | C20orf7  | violet      | sienna3 | 999.72 | 24.4937 | 0.987146  | 0.001746  | 8.882    | 0.174 |
| NM_214114.1    | JAK1     | greenyellow | sienna3 | 967.04 | 26.0435 | 0.999415  | 1.70E-05  | 87.804   | 0     |
| NM_214418.1    | SLC25A6  | blue        | sienna3 | 959.97 | 26.018  | 0.999208  | 2.67E-05  | 36.814   | --    |
| AY609865.1     | C3orf26  | turquoise   | sienna3 | 934.06 | 25.8051 | 0.997593  | 0.000142  | 6.686    | 99    |
| AY610104.1     | MED30    | blue        | sienna3 | 984.33 | 26.0055 | 0.99911   | 3.19E-05  | 11.082   | 0     |
| CF179281       |          | yellow      | sienna3 | 985.02 | 26.0117 | 0.999135  | 3.05E-05  | 15.44    | --    |
| BX673234       |          | turquoise   | sienna3 | 976.22 | 25.8601 | 0.998007  | 0.000107  | 19.346   | --    |
| CK462749       |          | navy        | sienna3 | 958.96 | 25.975  | 0.998888  | 4.45E-05  | 18.52    | 99    |
| BX915715       |          | turquoise   | sienna3 | 819.17 | 23.5621 | 0.979497  | 0.003513  | 6.578    | --    |
| CN165379       |          | turquoise   | sienna3 | 960.18 | 26.0823 | 0.999709  | 5.96E-06  | 9.342    | --    |
| AJ650064       |          | darkgreen   | sienna3 | 997.56 | 25.2344 | 0.993028  | 0.000698  | 10.914   | --    |
| DN109838       |          | darkorange  | sienna3 | 903.73 | 25.1741 | 0.992671  | 0.000752  | 5.576    | --    |
| DN112619       |          | yellow      | sienna3 | 948.96 | 25.7602 | 0.997291  | 0.000169  | 13.826   | --    |
| AJ948686       |          | pink        | sienna3 | 997.49 | 25.3733 | 0.994134  | 0.000539  | 82.726   | --    |
| DY411090       |          | navy        | sienna3 | 885.95 | 24.8686 | 0.990368  | 0.001133  | 11.92    | --    |
| DY411251       |          | darkgrey    | sienna3 | 974.65 | 25.9924 | 0.999026  | 3.65E-05  | 4.628    | --    |

Table S11-10. Module eigengene and its evolutionary rates in 13 postnatal highly LT-specific modules (LT\_skyblue).

| pig_Genebank   | pig_Gene  | LT            |         | kTotal | kWithin | eigencorr | eigenpval | meanExpr | Ka/Ks |
|----------------|-----------|---------------|---------|--------|---------|-----------|-----------|----------|-------|
|                |           | LDEModule     | Module  |        |         |           |           |          |       |
| AK230984.1     | SEC62     | magenta       | skyblue | 158.2  | 21.416  | 0.908692  | 0.032663  | 122.188  | --    |
| AK230996.1     | SCFD1     | turquoise     | skyblue | 200.61 | 29.772  | 0.977567  | 0.00402   | 33.306   | 0     |
| AK234533.1     | UBXN4     | skyblue       | skyblue | 133.05 | 21.12   | 0.903914  | 0.035234  | 107.052  | 0     |
| AK237795.1     | CCM2      | turquoise     | skyblue | 134.34 | 24.277  | 0.934058  | 0.020125  | 63.48    | 0.095 |
| AK234909.1     | NUB1      | magenta       | skyblue | 193.57 | 28.326  | 0.96578   | 0.00756   | 58.084   | --    |
| AK232067.1     | MRPL45    | royalblue     | skyblue | 285.14 | 30.753  | 0.981894  | 0.002917  | 102.95   | --    |
| AK235860.1     | CDK9      | navy          | skyblue | 385.28 | 24.382  | 0.923699  | 0.025009  | 32.598   | 0     |
| AK233082.1     | MCTS1     | paleturquoise | skyblue | 138.47 | 25.688  | 0.946564  | 0.014709  | 30.648   | --    |
| AK233149.1     | H2AFJ     | magenta       | skyblue | 196.25 | 30.244  | 0.980971  | 0.003142  | 29.952   | --    |
| XM_001928879.1 | DNAJC14   | royalblue     | skyblue | 182.41 | 30.63   | 0.987173  | 0.001741  | 22.122   | 0     |
| XM_001924251.1 | MYF6      | navy          | skyblue | 261.11 | 30.288  | 0.977752  | 0.00397   | 14.84    | 0     |
| XM_001929228.1 | IMP3      | lightyellow   | skyblue | 208.15 | 28.247  | 0.96505   | 0.007802  | 174.49   | 0     |
| XM_001924661.1 | SORBS1    | turquoise     | skyblue | 259.74 | 30.359  | 0.982862  | 0.002686  | 3.762    | 0.231 |
| XM_001927802.1 | ANXA7     | yellow        | skyblue | 252.91 | 31.914  | 0.992973  | 0.000706  | 191.054  | 99    |
| XM_001929407.1 | ANAPC7    | midnightblue  | skyblue | 191.65 | 28.969  | 0.971433  | 0.005771  | 7.474    | 0     |
| XM_001925019.1 | LOC388789 | purple        | skyblue | 95.051 | 15.907  | 0.835781  | 0.077888  | 1.84     | 0     |
| NM_001142666.1 | TEAD4     | blue          | skyblue | 168.87 | 28.984  | 0.973826  | 0.005063  | 19.042   | 0     |
| AY166682.1     | TMBIM6    |               | skyblue | 132.63 | 21.629  | 0.908613  | 0.032705  | 6.524    | --    |
| NM_213945.1    | PLAU      | lightyellow   | skyblue | 158.22 | 28.814  | 0.973236  | 0.005235  | 16.65    | 1.804 |
| NM_213830.1    | FOLR1     | brown         | skyblue | 178.75 | 30.126  | 0.981908  | 0.002913  | 6.136    | 0.074 |
| NM_214201.1    | GPX1      | navy          | skyblue | 382.6  | 27.701  | 0.957763  | 0.010354  | 100.962  | --    |
| NM_214333.1    | RPN1      | black         | skyblue | 465.35 | 22.955  | 0.913831  | 0.029968  | 51.702   | 0.115 |
| NM_001004045.1 | S100A11   | green         | skyblue | 232.16 | 32.194  | 0.995984  | 0.000305  | 11.934   | 0     |
| BX671974       |           | brown         | skyblue | 154.95 | 24.315  | 0.937373  | 0.018636  | 17.88    | --    |
| BX675792       |           | purple        | skyblue | 107.6  | 17.629  | 0.862718  | 0.059787  | 26.508   | --    |
| BP160266       |           | brown         | skyblue | 297.47 | 27.923  | 0.956479  | 0.010827  | 29.658   | --    |
| CK454008       |           | blue          | skyblue | 220.37 | 31.517  | 0.989849  | 0.001226  | 12.35    | --    |
| BX915041       |           | magenta       | skyblue | 293.86 | 30.525  | 0.980927  | 0.003153  | 150.048  | 99    |
| CN155564       |           | midnightblue  | skyblue | 292.24 | 27.557  | 0.960036  | 0.009533  | 23.276   | --    |
| DN100939       |           | yellow        | skyblue | 193.67 | 26.649  | 0.952993  | 0.012148  | 37.052   | --    |
| AJ951950       |           | pink          | skyblue | 323.22 | 29.338  | 0.970831  | 0.005954  | 4.27     | --    |
| DY405541       |           | lightgreen    | skyblue | 253.54 | 31.686  | 0.990419  | 0.001124  | 17.69    | 0     |
| DY418504       |           | orange        | skyblue | 236.45 | 30.175  | 0.978283  | 0.003829  | 20.854   | --    |
| EV886697       |           | navy          | skyblue | 284.32 | 31.135  | 0.986946  | 0.001787  | 3.454    | --    |
| EW137538       |           | violet        | skyblue | 362.61 | 27.376  | 0.959866  | 0.009593  | 16.734   | --    |
| EW140042       |           | white         | skyblue | 180.88 | 28.542  | 0.97089   | 0.005936  | 7.794    | --    |
| EW164176       |           | turquoise     | skyblue | 256.51 | 30.992  | 0.987984  | 0.001578  | 57.792   | --    |
| EW425085       |           | royalblue     | skyblue | 393.52 | 25.567  | 0.943137  | 0.016138  | 20.15    | --    |
| EW529809       |           | grey60        | skyblue | 330.41 | 25.381  | 0.939403  | 0.017743  | 7.336    | --    |
| EW605958       |           | red           | skyblue | 131.61 | 19.521  | 0.887641  | 0.044441  | 1.17     | --    |
| EW620642       |           | royalblue     | skyblue | 108.26 | 18.479  | 0.871648  | 0.054124  | 63.5     | --    |
| EW646525       |           | royalblue     | skyblue | 183.37 | 28.906  | 0.973623  | 0.005122  | 54.09    | --    |

Table S11-11. Module eigengene and its evolutionary rates in 13 postnatal highly LT-specific modules (LT\_tan).

| pig_Genebank   | pig_Gene | LDEModule     | LT     |        | eigencorr | eigenpval | meanExpr | Ka/Ks  |       |
|----------------|----------|---------------|--------|--------|-----------|-----------|----------|--------|-------|
|                |          |               | Module | kTotal |           |           |          |        |       |
| AK234190.1     | TGIF1    | green         | tan    | 859.8  | 66.2259   | 0.99055   | 0.001101 | 13.238 | 99    |
| AK234301.1     | RPUSD1   | darkgrey      | tan    | 948.21 | 59.4798   | 0.966342  | 0.007375 | 8.424  | 0     |
| AK234448.1     | ACTR10   | yellow        | tan    | 956.61 | 63.5046   | 0.979963  | 0.003394 | 17.49  | 0     |
| AK234779.1     | RAB1A    | turquoise     | tan    | 878.89 | 58.16     | 0.963613  | 0.008287 | 64.818 | 99    |
| AK231701.1     | SNORA60  | green         | tan    | 968.1  | 62.1502   | 0.97545   | 0.0046   | 16.754 | --    |
| AK235733.1     | B3GNT4   | tan           | tan    | 628.35 | 43.8202   | 0.904887  | 0.034706 | 29.846 | --    |
| AK238586.1     | SCAMP2   | turquoise     | tan    | 971.16 | 58.4439   | 0.962695  | 0.008601 | 29.312 | --    |
| AK238867.1     | UBXN7    | turquoise     | tan    | 971.59 | 66.8404   | 0.991471  | 0.000944 | 13.51  | --    |
| AK236069.1     | RRN3     | green         | tan    | 887.61 | 66.6943   | 0.991716  | 0.000904 | 16.896 | --    |
| AK239104.1     | PRPF8    | blue          | tan    | 868.72 | 60.4809   | 0.972055  | 0.005584 | 36.388 | 0     |
| AK236235.1     | ACP2     | blue          | tan    | 946.07 | 61.1264   | 0.971961  | 0.005612 | 9.444  | 0.171 |
| AK236339.1     | PSMD2    | blue          | tan    | 954.04 | 68.7753   | 0.998495  | 7.00E-05 | 96.72  | 99    |
| AK236564.1     | SPNS1    | yellow        | tan    | 816.92 | 62.7948   | 0.978958  | 0.003652 | 14.748 | 0     |
| AK232979.1     | MRPS5    | blue          | tan    | 870    | 63.2854   | 0.980977  | 0.00314  | 18.478 | 0     |
| AK233005.1     | ADPRHL2  | blue          | tan    | 897.41 | 66.8972   | 0.992596  | 0.000764 | 11.506 | 0     |
| AK236660.1     | CSNK1E   | black         | tan    | 859.04 | 65.4552   | 0.987944  | 0.001586 | 14.702 | 0     |
| AK233221.1     | MRPL54   | violet        | tan    | 887.36 | 67.3853   | 0.994395  | 0.000503 | 27.338 | --    |
| AK236998.1     | HMG2     | darkgrey      | tan    | 697.28 | 49.8637   | 0.933007  | 0.020605 | 4.57   | --    |
| AK233770.1     | PSMG2    | turquoise     | tan    | 868.89 | 62.7325   | 0.979469  | 0.00352  | 24.682 | 0.183 |
| AK237173.1     | PSMA5    | turquoise     | tan    | 929.95 | 68.8562   | 0.998667  | 5.84E-05 | 75.204 | --    |
| AK237326.1     | THOC4    | darkgrey      | tan    | 934.73 | 68.7016   | 0.998013  | 0.000106 | 26.106 | --    |
| NM_001105296.1 | RAE1     | blue          | tan    | 923.69 | 67.5491   | 0.994148  | 0.000537 | 13.62  | 0     |
| NM_001114675.1 | BAT2     | turquoise     | tan    | 745.76 | 48.354    | 0.928064  | 0.022909 | 24.292 | 0.18  |
| NM_001123160.1 | PFDN4    | darkorange    | tan    | 669.4  | 46.6932   | 0.918141  | 0.027767 | 40.954 | 0     |
| NM_001123096.1 | CDC37    | darkorange    | tan    | 857.76 | 65.8309   | 0.98905   | 0.001373 | 36.464 | 99    |
| XM_001929183.1 | ARPC5L   | greenyellow   | tan    | 952.04 | 63.8208   | 0.98164   | 0.002978 | 16.118 | 0     |
| XM_001925462.1 | CPSF1    | blue          | tan    | 878.27 | 66.6415   | 0.991596  | 0.000924 | 22.512 | 0     |
| XM_001926844.1 | THBS3    | turquoise     | tan    | 845.18 | 56.9761   | 0.960098  | 0.009511 | 6.268  | 0.24  |
| XM_001926489.1 | SF3B4    | midnightblue  | tan    | 929.24 | 68.6359   | 0.997811  | 0.000123 | 12.766 | 99    |
| XM_001927969.1 | PEX11B   | darkgrey      | tan    | 773.11 | 59.585    | 0.969063  | 0.006502 | 8.484  | 0     |
| XM_001928010.1 | ARFGEF1  | darkgrey      | tan    | 921.77 | 65.04     | 0.985749  | 0.002038 | 28.264 | 0.19  |
| XM_001927323.1 | PFDN2    | turquoise     | tan    | 926.02 | 66.9487   | 0.992401  | 0.000794 | 53.808 | 99    |
| XM_001926355.1 | EEA1     | brown         | tan    | 649.79 | 48.6092   | 0.925086  | 0.024335 | 11.066 | --    |
| XM_001928013.1 | MLF2     | darkturquoise | tan    | 680.17 | 50.1113   | 0.93178   | 0.021169 | 42.366 | 0     |
| XM_001925784.1 | USP5     | red           | tan    | 945.09 | 68.5723   | 0.997451  | 0.000154 | 17.48  | 0     |
| XM_001929118.1 | TOX4     | black         | tan    | 903.06 | 67.7928   | 0.99554   | 0.000357 | 18.33  | 0     |
| XM_001929425.1 | ZXDC     | green         | tan    | 912.75 | 53.7084   | 0.946749  | 0.014633 | 14.456 | 0.217 |
| XM_001928400.1 | HMGA1    | turquoise     | tan    | 921.21 | 67.9716   | 0.9959    | 0.000315 | 21.998 | 99    |
| XM_001924555.1 | RUVBL1   | turquoise     | tan    | 920.55 | 67.8438   | 0.995228  | 0.000395 | 30.428 | --    |
| XM_001926774.1 | PDCD11   | tan           | tan    | 922.4  | 64.0569   | 0.982979  | 0.002659 | 8.576  | 0.733 |
| XM_001927455.1 |          | turquoise     | tan    | 827.64 | 64.471    | 0.985001  | 0.0022   | 21.452 | 99    |
| XM_001925272.1 | GCN1L1   | brown         | tan    | 907.03 | 66.0685   | 0.989515  | 0.001287 | 17.712 | 0     |
| XM_001929306.1 | PES1     | turquoise     | tan    | 925.87 | 65.864    | 0.988472  | 0.001483 | 21.116 | 0     |

|                          |               |     |        |         |          |          |         |       |
|--------------------------|---------------|-----|--------|---------|----------|----------|---------|-------|
| XM_001927785.1 TRMT2A    | white         | tan | 942.3  | 67.8939 | 0.995096 | 0.000412 | 15.608  | 0.435 |
| XM_001927891.1 OBFC2A    | turquoise     | tan | 952.08 | 60.6785 | 0.97     | 0.006209 | 14.838  | --    |
| NM_214024.1 PPP2R1A      | green         | tan | 888.35 | 67.5202 | 0.994681 | 0.000465 | 48.738  | 0     |
| NM_214064.1 FMO1         | lightcyan     | tan | 918.34 | 68.0149 | 0.99585  | 0.000321 | 21.516  | 0.208 |
| NM_214115.1 LOC100293737 | red           | tan | 962.24 | 68.8345 | 0.998501 | 6.97E-05 | 63.158  | 0     |
| NM_213785.1 F3           | lightyellow   | tan | 908.84 | 63.5084 | 0.980692 | 0.003211 | 4.328   | 0     |
| NM_001001640.1 MAOA      | turquoise     | tan | 944.92 | 62.5345 | 0.976691 | 0.004257 | 9.332   | 99    |
| AY609443.1 CWC15         | greenyellow   | tan | 812.67 | 59.6284 | 0.969801 | 0.006271 | 35.324  | 0     |
| AY609846.1               | turquoise     | tan | 938.3  | 66.601  | 0.991284 | 0.000975 | 46.648  | --    |
| CF791338                 | turquoise     | tan | 958.53 | 66.3499 | 0.989708 | 0.001251 | 12.804  | --    |
| BX665362                 | turquoise     | tan | 908.69 | 67.9846 | 0.995788 | 0.000328 | 17.336  | --    |
| BX666608                 | black         | tan | 962.3  | 59.6627 | 0.966572 | 0.0073   | 24.24   | --    |
| BP438990                 | darkturquoise | tan | 937.3  | 68.1633 | 0.996151 | 0.000286 | 22.744  | --    |
| CK460835                 | darkgrey      | tan | 937.06 | 67.9092 | 0.995936 | 0.000311 | 26.54   | --    |
| CK461051                 | pink          | tan | 982.08 | 66.0234 | 0.989119 | 0.00136  | 120.272 | --    |
| CK461743                 | pink          | tan | 623.89 | 48.1587 | 0.922757 | 0.02547  | 4.008   | --    |
| BX920888                 | turquoise     | tan | 951.47 | 58.3595 | 0.962376 | 0.008711 | 12.518  | --    |
| BX926893                 | red           | tan | 898.58 | 65.9559 | 0.989906 | 0.001215 | 3.58    | --    |
| CN155787                 | greenyellow   | tan | 963.86 | 63.1134 | 0.978608 | 0.003744 | 16.204  | --    |
| CN156506                 | turquoise     | tan | 698.03 | 54.1327 | 0.948441 | 0.013944 | 48.094  | --    |
| CN158610                 | turquoise     | tan | 957.05 | 68.6506 | 0.998039 | 0.000104 | 8.738   | 99    |
| CN162120                 | skyblue       | tan | 960.85 | 68.5004 | 0.99724  | 0.000174 | 42.928  | --    |
| CJ009195                 | pink          | tan | 929.12 | 67.1243 | 0.992529 | 0.000774 | 17.24   | --    |
| DN100796                 | red           | tan | 933.63 | 68.6914 | 0.998057 | 0.000103 | 3.642   | --    |
| DN130021                 | turquoise     | tan | 965.69 | 59.4407 | 0.965927 | 0.007511 | 26.584  | --    |
| AJ947285                 | pink          | tan | 902.23 | 50.0961 | 0.934914 | 0.019737 | 3.832   | --    |
| AJ954681                 | green         | tan | 823.4  | 63.7095 | 0.982725 | 0.002719 | 42.958  | --    |
| AJ944251                 | black         | tan | 660.9  | 50.3053 | 0.93255  | 0.020815 | 59.864  | --    |
| DB814387                 | grey          | tan | 971.94 | 68.0118 | 0.995577 | 0.000353 | 25.91   | --    |
| DT333190                 | lightcyan     | tan | 946.72 | 67.4805 | 0.993783 | 0.000588 | 50.986  | --    |
| EV892254                 | purple        | tan | 976.44 | 66.3166 | 0.989797 | 0.001235 | 8.206   | --    |
| EV928650                 | yellow        | tan | 950.84 | 65.0015 | 0.986067 | 0.00197  | 11.446  | --    |
| EW250005                 | greenyellow   | tan | 865.29 | 66.4521 | 0.99126  | 0.00098  | 3.198   | --    |
| EW573848                 | turquoise     | tan | 889.71 | 67.2329 | 0.993774 | 0.000589 | 18.622  | --    |
| EW637050                 | turquoise     | tan | 794.17 | 60.938  | 0.972599 | 0.005422 | 48.5    | --    |



Table S11-12. Module eigengene and its evolutionary rates in 13 postnatal highly LT-specific modules (LT\_violet).

| pig_Genebank   | pig_Gene | LDEModule    | LT     |        | kTotal | kWithin | eigencorr | eigenpval | meanExpr | Ka/Ks |
|----------------|----------|--------------|--------|--------|--------|---------|-----------|-----------|----------|-------|
|                |          |              | Module | kTotal |        |         |           |           |          |       |
| NM_001044599.1 | GADD45A  | midnightblue | violet |        | 986.3  | 74.5655 | 0.997437  | 0.000156  | 101.432  | --    |
| AK234174.1     | TMEM222  | blue         | violet |        | 906.6  | 73.3303 | 0.994055  | 0.00055   | 18.3     | 99    |
| AK230853.1     | MTA3     | darkorange   | violet |        | 937    | 73.5181 | 0.994666  | 0.000467  | 54.728   | --    |
| AK234466.1     | SDHAF1   | white        | violet |        | 960    | 73.621  | 0.994903  | 0.000436  | 9.502    | 99    |
| AK235357.1     | RHOB     | turquoise    | violet |        | 994.9  | 70.7411 | 0.986701  | 0.001837  | 12.426   | 99    |
| AK238334.1     | SLC35D2  | midnightblue | violet |        | 892.8  | 72.0224 | 0.990452  | 0.001118  | 6.634    | 99    |
| AK238521.1     | MCAT     | blue         | violet |        | 943.5  | 74.2854 | 0.996718  | 0.000226  | 5.836    | 99    |
| AK235670.1     | DCP1A    | turquoise    | violet |        | 894.3  | 73.2338 | 0.993754  | 0.000592  | 13.352   | --    |
| AK238622.1     | PA2G4    | green        | violet |        | 941    | 74.2577 | 0.996635  | 0.000234  | 47.656   | 99    |
| AK232646.1     | DHRS11   | darkgrey     | violet |        | 981    | 74.1176 | 0.996227  | 0.000278  | 8.91     | 0.13  |
| AK236459.1     | BOP1     | blue         | violet |        | 857.6  | 71.217  | 0.98809   | 0.001558  | 18.736   | 99    |
| AK236478.1     | PRMT5    | red          | violet |        | 993.7  | 72.8925 | 0.992809  | 0.000731  | 76.252   | --    |
| AK239867.1     | IFFO2    | lightcyan    | violet |        | 961.1  | 72.9736 | 0.993145  | 0.000681  | 4.688    | --    |
| AK233322.1     | ZDHHC9   | orange       | violet |        | 958.8  | 74.068  | 0.996135  | 0.000288  | 6.874    | 0     |
| AK239998.1     | ATP6V0D2 |              | violet |        | 929.5  | 74.6499 | 0.997668  | 0.000135  | 1.766    | 0     |
| NM_001097476.1 | PSMB7    | greenyellow  | violet |        | 994.4  | 73.1253 | 0.993492  | 0.00063   | 71.374   | 99    |
| EF468461.1     |          | red          | violet |        | 942.6  | 74.7919 | 0.998074  | 0.000101  | 5.98     | --    |
| NM_001105294.1 | KCNAB1   | pink         | violet |        | 976.9  | 75.113  | 0.99894   | 4.14E-05  | 74.434   | 99    |
| NM_001044582.1 | ZRANB2   | black        | violet |        | 984.1  | 71.9628 | 0.990341  | 0.001138  | 50.222   | 99    |
| NM_001111257.1 | LMNA     | red          | violet |        | 958.2  | 74.4621 | 0.997202  | 0.000178  | 39.34    | 0.187 |
| NM_001123101.1 | TBRG4    | black        | violet |        | 983.5  | 72.2794 | 0.99111   | 0.001005  | 67.724   | 99    |
| NM_001123127.1 | HSPA6    | grey60       | violet |        | 957.3  | 75.0893 | 0.998884  | 4.47E-05  | 11.052   | --    |
| XM_001928828.1 | NUP188   | turquoise    | violet |        | 996.2  | 69.2339 | 0.982324  | 0.002814  | 17.056   | 0     |
| XM_001927442.1 | THBS1    | turquoise    | violet |        | 950.9  | 75.0263 | 0.998713  | 5.54E-05  | 24.2     | 0     |
| XM_001929662.1 | MLLT11   | turquoise    | violet |        | 931    | 72.9269 | 0.993016  | 0.0007    | 2.782    | --    |
| XM_001927860.1 | RBM8A    | darkgrey     | violet |        | 967.3  | 74.7119 | 0.997864  | 0.000118  | 77.012   | 0     |
| XM_001928665.1 | NPTN     | lightyellow  | violet |        | 978.6  | 74.4686 | 0.99721   | 0.000177  | 121.05   | 99    |
| XM_001924410.1 | UNC5CL   | violet       | violet |        | 923.9  | 72.6127 | 0.992143  | 0.000835  | 3.28     | 0.048 |
| XM_001929613.1 | RXRБ     | black        | violet |        | 959.6  | 75.2566 | 0.999329  | 2.08E-05  | 15.852   | 0     |
| XM_001929415.1 | FKBP5    | blue         | violet |        | 903.2  | 73.4465 | 0.994365  | 0.000507  | 10.266   | 0     |
| XM_001929580.1 | MTCH1    | greenyellow  | violet |        | 977.6  | 74.4579 | 0.997176  | 0.00018   | 100.576  | 99    |
| XM_001925120.1 | DNAJC15  | turquoise    | violet |        | 970.8  | 72.7159 | 0.992409  | 0.000793  | 14.086   | 99    |
| XM_001929282.1 | CCDC6    | green        | violet |        | 851.5  | 70.4304 | 0.985856  | 0.002015  | 14.528   | 99    |
| XM_001928565.1 | RHBDD3   | turquoise    | violet |        | 945    | 72.9071 | 0.993022  | 0.000699  | 3.78     | 0     |
| NM_001142668.1 | DKC1     | blue         | violet |        | 971.7  | 73.481  | 0.994498  | 0.000489  | 11.774   | 99    |
| AY553927.1     | NUP88    | turquoise    | violet |        | 985.2  | 72.4136 | 0.99149   | 0.000941  | 10.132   | --    |
| NM_213943.1    | PDXK     | lightgreen   | violet |        | 950.2  | 74.3936 | 0.997007  | 0.000196  | 9.858    | --    |
| NM_214306.1    | HSD17B4  | turquoise    | violet |        | 994.2  | 70.5367 | 0.986109  | 0.001961  | 41.282   | 0     |
| NM_214397.1    | DLST     | blue         | violet |        | 929    | 73.7223 | 0.99519   | 0.0004    | 39.714   | 99    |
| AY609561.1     | UTP11L   | red          | violet |        | 997.7  | 70.3596 | 0.985592  | 0.002072  | 23.57    | 0.46  |
| AY609827.1     | HSPBP1   | turquoise    | violet |        | 991.8  | 70.8928 | 0.987177  | 0.00174   | 10.968   | 99    |
| AY609906.1     | LSM6     | greenyellow  | violet |        | 967.7  | 73.211  | 0.993804  | 0.000585  | 53.002   | 99    |
| AY609650.1     | REXO2    | red          | violet |        | 917.9  | 73.7301 | 0.995181  | 0.000401  | 95.92    | --    |

|                      |               |        |       |         |          |          |        |       |
|----------------------|---------------|--------|-------|---------|----------|----------|--------|-------|
| NM_001033014.1 MYBPH | turquoise     | violet | 877.2 | 71.0546 | 0.98772  | 0.001631 | 121.53 | 0.074 |
| CF180385             | darkgrey      | violet | 945.1 | 74.9882 | 0.998607 | 6.24E-05 | 11.172 | --    |
| CF181085             | pink          | violet | 784.3 | 66.2885 | 0.973546 | 0.005144 | 19.36  | --    |
| CF181098             | darkgrey      | violet | 989   | 72.2569 | 0.991041 | 0.001016 | 6.154  | --    |
| BX670323             | red           | violet | 945.4 | 74.7223 | 0.997888 | 0.000116 | 17.406 | 0     |
| BX674366             | red           | violet | 870.5 | 71.7755 | 0.989679 | 0.001257 | 4.08   | --    |
| BP166990             | navy          | violet | 929.5 | 74.6499 | 0.997668 | 0.000135 | 0.272  | --    |
| BP169289             | pink          | violet | 984.9 | 74.9802 | 0.998573 | 6.47E-05 | 69.484 | --    |
| CK452682             | darkturquoise | violet | 929.5 | 74.6499 | 0.997668 | 0.000135 | 0.498  | --    |
| CK454341             | lightcyan     | violet | 980.2 | 74.6742 | 0.997748 | 0.000128 | 6.744  | 0.204 |
| CK463529             | brown         | violet | 988.4 | 74.7533 | 0.997947 | 0.000112 | 37.492 | --    |
| CK463769             | red           | violet | 905.9 | 73.5922 | 0.994767 | 0.000454 | 2.684  | --    |
| BX916105             | turquoise     | violet | 949.7 | 74.7797 | 0.998046 | 0.000104 | 7.356  | --    |
| BX917585             | turquoise     | violet | 985.7 | 73.0841 | 0.993358 | 0.000649 | 20.852 | 99    |
| BX918749             | turquoise     | violet | 961.2 | 74.4906 | 0.997268 | 0.000171 | 9.134  | --    |
| BX924061             | turquoise     | violet | 963.6 | 74.1334 | 0.996298 | 0.00027  | 14.88  | --    |
| BX925530             | blue          | violet | 849.7 | 69.0774 | 0.982028 | 0.002884 | 4.122  | --    |
| CN155182             | greenyellow   | violet | 964.4 | 72.6947 | 0.992451 | 0.000786 | 6.77   | 0.273 |
| CN156505             | midnightblue  | violet | 894.6 | 72.3226 | 0.99127  | 0.000978 | 9.166  | --    |
| AJ604585             | turquoise     | violet | 989.7 | 72.0963 | 0.990648 | 0.001084 | 37.062 | --    |
| DN113111             | red           | violet | 929.5 | 74.6499 | 0.997668 | 0.000135 | 1.63   | --    |
| DN121492             | blue          | violet | 952   | 75.104  | 0.998919 | 4.26E-05 | 29.434 | --    |
| BW981763             | red           | violet | 966.9 | 74.89   | 0.998342 | 8.10E-05 | 23.918 | 99    |
| AJ959592             | turquoise     | violet | 929.5 | 74.6499 | 0.997668 | 0.000135 | 0.318  | --    |
| AJ944669             | turquoise     | violet | 960.8 | 72.969  | 0.993161 | 0.000678 | 23.122 | --    |
| DV225793             | yellow        | violet | 993.2 | 71.3896 | 0.988629 | 0.001453 | 57.024 | --    |
| CV871831             | darkgrey      | violet | 892.6 | 73.012  | 0.993171 | 0.000677 | 14.282 | --    |
| DB812928             | pink          | violet | 951.6 | 74.0329 | 0.996043 | 0.000299 | 7.552  | --    |
| DT325159             | turquoise     | violet | 952.7 | 73.9402 | 0.995788 | 0.000328 | 11.086 | --    |
| DT332551             | royalblue     | violet | 821   | 68.3984 | 0.979935 | 0.003402 | 7.19   | --    |
| EV987323             | pink          | violet | 929.5 | 74.6499 | 0.997668 | 0.000135 | 3.624  | --    |
| EW148180             | white         | violet | 937.6 | 74.8492 | 0.998218 | 9.03E-05 | 13.494 | --    |
| EW258248             | blue          | violet | 930.5 | 74.1585 | 0.996361 | 0.000263 | 4.25   | --    |
| EW569850             | turquoise     | violet | 982.8 | 73.3687 | 0.994216 | 0.000528 | 3.624  | 99    |
| EW588718             | salmon        | violet | 999.1 | 68.9031 | 0.981398 | 0.003037 | 10.068 | 0     |
| BI181927             | greenyellow   | violet | 901.8 | 72.3418 | 0.991363 | 0.000962 | 8.354  | --    |

Table S11-13. Module eigengene and its evolutionary rates in 13 postnatal highly LT-specific modules (LT\_yellowgreen).

| pig_Genebank   | pig_Gene | LDE         |             | kTotal | kWithin | eigencorr | eigenpval | meanExpr | Ka/Ks  |
|----------------|----------|-------------|-------------|--------|---------|-----------|-----------|----------|--------|
|                |          | Module      | LTModule    |        |         |           |           |          |        |
| AK238056.1     |          | turquoise   | yellowgreen | 151.15 | 13.4218 | 0.91551   | 0.029106  | 28.904   | --     |
| AK235964.1     | NCKIPSD  | tan         | yellowgreen | 173.13 | 18.5715 | 0.99612   | 0.00029   | 99.902   | --     |
| AK232610.1     | SLC25A30 | navy        | yellowgreen | 146.67 | 13.0903 | 0.91757   | 0.028055  | 35.448   | --     |
| AK233542.1     | CALM1    | violet      | yellowgreen | 164.6  | 16.7425 | 0.97426   | 0.004938  | 332.47   | --     |
| XM_001925794.1 | VLDLR    | lightyellow | yellowgreen | 188.24 | 18.2057 | 0.99225   | 0.000818  | 17.268   | --     |
| XM_001929512.1 | DENND4B  | brown       | yellowgreen | 156.4  | 14.9862 | 0.9479    | 0.014162  | 87.66    | 0.1783 |
| NM_001142669.1 | TEAD1    | skyblue     | yellowgreen | 181.08 | 15.2756 | 0.95078   | 0.013012  | 14.778   | 0      |
| AY550051.1     | NPEPPS   | lightgreen  | yellowgreen | 174.2  | 18.4178 | 0.99338   | 0.000647  | 29.3     | 0      |
| NM_214171.1    | CAPN3    | lightcyan   | yellowgreen | 169.84 | 16.6719 | 0.97066   | 0.006006  | 13.712   | 0.0677 |
| NM_214193.1    | CAMK2G   | magenta     | yellowgreen | 165.96 | 17.5488 | 0.9841    | 0.002401  | 26.932   | 0      |
| CF359380       |          | navy        | yellowgreen | 165.99 | 15.3662 | 0.95577   | 0.011091  | 38.11    | --     |
| CF365654       |          | yellow      | yellowgreen | 165.78 | 16.0837 | 0.96596   | 0.0075    | 14.168   | --     |
| BX673774       |          | lightgreen  | yellowgreen | 184.23 | 18.2838 | 0.99073   | 0.00107   | 124.658  | --     |
| CK459166       |          | magenta     | yellowgreen | 137.37 | 11.7671 | 0.89042   | 0.04282   | 36.324   | --     |
| CN156784       |          | navy        | yellowgreen | 171.08 | 16.1078 | 0.96247   | 0.008677  | 32.604   | --     |
| CN161737       |          | lightyellow | yellowgreen | 177.3  | 17.293  | 0.97527   | 0.00465   | 6.862    | --     |
| DN111119       |          | magenta     | yellowgreen | 162.77 | 16.576  | 0.9664    | 0.007355  | 11.53    | --     |
| BW955252       |          | magenta     | yellowgreen | 167.77 | 17.747  | 0.98747   | 0.001681  | 53.628   | --     |
| AJ943520       |          | lightyellow | yellowgreen | 188.09 | 17.6343 | 0.982     | 0.00289   | 5.038    | --     |
| DB802598       |          | lightyellow | yellowgreen | 204.69 | 16.1232 | 0.96373   | 0.008245  | 52.902   | --     |
| DT327799       |          | lightyellow | yellowgreen | 187.86 | 15.8187 | 0.95897   | 0.009915  | 333.972  | --     |
| DT331423       |          | royalblue   | yellowgreen | 131.33 | 10.3514 | 0.86214   | 0.060159  | 17.464   | 99     |
| EV884726       |          | red         | yellowgreen | 190.69 | 17.0706 | 0.97886   | 0.003678  | 1.628    | --     |
| EW589160       |          | brown       | yellowgreen | 162.02 | 16.2501 | 0.96697   | 0.007169  | 12.612   | --     |

Table S12-1. GO annotation analysis of the module eigengene in 15 postnatal highly LDE-specific modules (LDE\_black).

| GO ID      | GO Name                                                           | Total Count | Diff Count | P Value     | FDR         | Gene                                  |
|------------|-------------------------------------------------------------------|-------------|------------|-------------|-------------|---------------------------------------|
| GO:0006531 | aspartate metabolic process                                       | 2           | 2          | 2.22718E-06 | 0.000291761 | [GOT1, GOT2]                          |
| GO:0006533 | aspartate catabolic process                                       | 3           | 2          | 6.67505E-06 | 0.000437216 | [GOT1, GOT2]                          |
| GO:0006103 | 2-oxoglutarate metabolic process                                  | 7           | 2          | 4.6544E-05  | 0.00203242  | [GOT1, GOT2]                          |
| GO:0006536 | glutamate metabolic process                                       | 9           | 2          | 7.96347E-05 | 0.002608036 | [GOT1, GOT2]                          |
| GO:0008380 | RNA splicing                                                      | 150         | 4          | 8.01134E-05 | 0.002098972 | [MPHOSPH10, PRPF40A, RBM10, ZRANB2]   |
| GO:0006810 | transport                                                         | 395         | 5          | 0.000327883 | 0.007158789 | [CD36, DYNC1I2, GOT2, NDUFA5, NDUFS2] |
| GO:0007155 | cell adhesion                                                     | 420         | 5          | 0.000433646 | 0.00811538  | [APP, CD36, CD99, CTNNA1, FERMT2]     |
| GO:0001666 | response to hypoxia                                               | 32          | 2          | 0.001072961 | 0.017569741 | [ANGPTL4, LONP1]                      |
| GO:0045766 | positive regulation of angiogenesis                               | 34          | 2          | 0.00121122  | 0.017629983 | [ANGPTL4, KDR]                        |
| GO:0006397 | mRNA processing                                                   | 144         | 3          | 0.001360578 | 0.017823567 | [PRPF40A, RBM10, ZRANB2]              |
| GO:0044319 | wound healing, spreading of cells                                 | 1           | 1          | 0.001503794 | 0.012312311 | [DDR1]                                |
| GO:0006543 | glutamine catabolic process                                       | 1           | 1          | 0.001503794 | 0.012312311 | [GLS]                                 |
| GO:0048669 | collateral sprouting in absence of injury                         | 1           | 1          | 0.001503794 | 0.012312311 | [APP]                                 |
| GO:0061302 | smooth muscle cell-matrix adhesion                                | 1           | 1          | 0.001503794 | 0.012312311 | [DDR1]                                |
| GO:0007176 | regulation of epidermal growth factor-activated receptor activity | 1           | 1          | 0.001503794 | 0.012312311 | [APP]                                 |
| GO:0070407 | oxidation-dependent protein catabolic process                     | 1           | 1          | 0.001503794 | 0.012312311 | [LONP1]                               |
| GO:0038083 | peptidyl-tyrosine autophosphorylation                             | 1           | 1          | 0.001503794 | 0.012312311 | [DDR1]                                |
| GO:0007617 | mating behavior                                                   | 1           | 1          | 0.001503794 | 0.012312311 | [APP]                                 |
| GO:0008088 | axon cargo transport                                              | 1           | 1          | 0.001503794 | 0.012312311 | [APP]                                 |
| GO:0032042 | mitochondrial DNA metabolic process                               | 1           | 1          | 0.001503794 | 0.012312311 | [LONP1]                               |
| GO:0051770 | positive regulation of nitric-oxide synthase biosynthetic process | 1           | 1          | 0.001503794 | 0.012312311 | [KDR]                                 |
| GO:0006120 | mitochondrial electron transport, NADH to ubiquinone              | 42          | 2          | 0.001844576 | 0.010983613 | [NDUFA5, NDUFS2]                      |
| GO:0014909 | smooth muscle cell migration                                      | 2           | 1          | 0.00300536  | 0.015142391 | [DDR1]                                |

|            |                                                               |    |   |             |                                |
|------------|---------------------------------------------------------------|----|---|-------------|--------------------------------|
| GO:0038063 | collagen-activated tyrosine kinase receptor signaling pathway | 2  | 1 | 0.00300536  | 0.015142391 [DDR1]             |
| GO:0008344 | adult locomotory behavior                                     | 2  | 1 | 0.00300536  | 0.015142391 [APP]              |
| GO:0051318 | G1 phase                                                      | 2  | 1 | 0.00300536  | 0.015142391 [ZNF655]           |
| GO:0050803 | regulation of synapse structure and activity                  | 2  | 1 | 0.00300536  | 0.015142391 [APP]              |
| GO:0051384 | response to glucocorticoid stimulus                           | 2  | 1 | 0.00300536  | 0.015142391 [GOT1]             |
| GO:0003158 | endothelium development                                       | 2  | 1 | 0.00300536  | 0.015142391 [KDR]              |
| GO:0051603 | proteolysis involved in cellular protein catabolic process    | 3  | 1 | 0.004504703 | 0.018157417 [LONP1]            |
| GO:0010715 | regulation of extracellular matrix disassembly                | 3  | 1 | 0.004504703 | 0.018157417 [DDR1]             |
| GO:0040014 | regulation of multicellular organism growth                   | 3  | 1 | 0.004504703 | 0.018157417 [APP]              |
| GO:0015908 | fatty acid transport                                          | 3  | 1 | 0.004504703 | 0.018157417 [GOT2]             |
| GO:0031340 | positive regulation of vesicle fusion                         | 3  | 1 | 0.004504703 | 0.018157417 [ANXA2]            |
| GO:0035162 | embryonic hemopoiesis                                         | 3  | 1 | 0.004504703 | 0.018157417 [KDR]              |
| GO:0008360 | regulation of cell shape                                      | 67 | 2 | 0.004623592 | 0.016824739 [FERMT2, PRPF40A]  |
| GO:0035584 | calcium-mediated signaling using intracellular calcium source | 4  | 1 | 0.006001825 | 0.019904785 [KDR]              |
| GO:0045047 | protein targeting to ER                                       | 4  | 1 | 0.006001825 | 0.019904785 [SEC61A1]          |
| GO:0016199 | axon midline choice point recognition                         | 4  | 1 | 0.006001825 | 0.019904785 [APP]              |
| GO:0048010 | vascular endothelial growth factor receptor signaling pathway | 4  | 1 | 0.006001825 | 0.019904785 [KDR]              |
| GO:0000085 | G2 phase of mitotic cell cycle                                | 4  | 1 | 0.006001825 | 0.019904785 [APP]              |
| GO:0000002 | mitochondrial genome maintenance                              | 4  | 1 | 0.006001825 | 0.019904785 [LONP1]            |
| GO:0006364 | rRNA processing                                               | 80 | 2 | 0.006525708 | 0.019880644 [MPHOSPH10, UTP18] |
| GO:0035235 | ionotropic glutamate receptor signaling pathway               | 5  | 1 | 0.007496729 | 0.02134938 [APP]               |
| GO:0008154 | actin polymerization or depolymerization                      | 5  | 1 | 0.007496729 | 0.02134938 [ABI1]              |
| GO:0006878 | cellular copper ion homeostasis                               | 5  | 1 | 0.007496729 | 0.02134938 [APP]               |
| GO:0016322 | neuron remodeling                                             | 5  | 1 | 0.007496729 | 0.02134938 [APP]               |
| GO:0071681 | cellular response to indole-3-methanol                        | 5  | 1 | 0.007496729 | 0.02134938 [CTNNA1]            |
| GO:0032869 | cellular response to insulin stimulus                         | 6  | 1 | 0.008989419 | 0.022430741 [GOT1]             |
| GO:0032465 | regulation of cytokinesis                                     | 6  | 1 | 0.008989419 | 0.022430741 [PRPF40A]          |
| GO:0043297 | apical junction assembly                                      | 6  | 1 | 0.008989419 | 0.022430741 [CTNNA1]           |
| GO:0006777 | Mo-molybdopterin cofactor biosynthetic process                | 6  | 1 | 0.008989419 | 0.022430741 [NFS1]             |
| GO:0008542 | visual learning                                               | 6  | 1 | 0.008989419 | 0.022430741 [APP]              |
| GO:0045184 | establishment of protein localization                         | 6  | 1 | 0.008989419 | 0.022430741 [ANK3]             |

|            |                                                                                  |     |   |             |                            |
|------------|----------------------------------------------------------------------------------|-----|---|-------------|----------------------------|
| GO:0000080 | G1 phase of mitotic cell cycle                                                   | 6   | 1 | 0.008989419 | 0.022430741 [TBRG4]        |
| GO:2000352 | negative regulation of endothelial cell apoptosis                                | 6   | 1 | 0.008989419 | 0.022430741 [KDR]          |
| GO:0008284 | positive regulation of cell proliferation                                        | 102 | 2 | 0.010414202 | 0.023934393 [KDR, TBRG4]   |
| GO:0016358 | dendrite development                                                             | 7   | 1 | 0.010479898 | 0.023467806 [APP]          |
| GO:0035924 | cellular response to vascular endothelial growth factor stimulus                 | 7   | 1 | 0.010479898 | 0.023467806 [KDR]          |
| GO:0046777 | protein autophosphorylation                                                      | 107 | 2 | 0.011410505 | 0.024912935 [DDR1, KDR]    |
| GO:0006091 | generation of precursor metabolites and energy                                   | 8   | 1 | 0.01196817  | 0.025085284 [OGDH]         |
| GO:0033523 | histone H2B ubiquitination                                                       | 8   | 1 | 0.01196817  | 0.025085284 [PAF1]         |
| GO:0007018 | microtubule-based movement                                                       | 8   | 1 | 0.01196817  | 0.025085284 [DYNC1I2]      |
| GO:0006396 | RNA processing                                                                   | 8   | 1 | 0.01196817  | 0.025085284 [MPHOSPH10]    |
| GO:0051402 | neuron apoptosis                                                                 | 9   | 1 | 0.013454237 | 0.026503835 [APP]          |
| GO:0045471 | response to ethanol                                                              | 9   | 1 | 0.013454237 | 0.026503835 [GOT2]         |
| GO:0009165 | nucleotide biosynthetic process                                                  | 9   | 1 | 0.013454237 | 0.026503835 [PRPSAP1]      |
| GO:0034599 | cellular response to oxidative stress                                            | 9   | 1 | 0.013454237 | 0.026503835 [LONP1]        |
| GO:0043066 | negative regulation of apoptotic process                                         | 118 | 2 | 0.013743293 | 0.026092339 [ANGPTL4, KDR] |
| GO:0006378 | mRNA polyadenylation                                                             | 10  | 1 | 0.014938102 | 0.027757325 [APP]          |
| GO:0010390 | histone monoubiquitination                                                       | 10  | 1 | 0.014938102 | 0.027757325 [PAF1]         |
| GO:0007626 | locomotory behavior                                                              | 11  | 1 | 0.01641977  | 0.029668825 [APP]          |
| GO:0045333 | cellular respiration                                                             | 11  | 1 | 0.01641977  | 0.029668825 [TBRG4]        |
| GO:0032436 | positive regulation of proteasomal ubiquitin-dependent protein catabolic process | 12  | 1 | 0.017899242 | 0.031686496 [CSNK1E]       |
| GO:0006446 | regulation of translational initiation                                           | 13  | 1 | 0.019376523 | 0.033844327 [EIF4G2]       |
| GO:0007346 | regulation of mitotic cell cycle                                                 | 14  | 1 | 0.020851615 | 0.035474826 [ZNF655]       |
| GO:0001570 | vasculogenesis                                                                   | 14  | 1 | 0.020851615 | 0.035474826 [KDR]          |
| GO:0030199 | collagen fibril organization                                                     | 14  | 1 | 0.020851615 | 0.035474826 [LUM]          |
| GO:0007005 | mitochondrion organization                                                       | 15  | 1 | 0.022324522 | 0.03678632 [LONP1]         |
| GO:0030198 | extracellular matrix organization                                                | 15  | 1 | 0.022324522 | 0.03678632 [APP]           |
| GO:0045931 | positive regulation of mitotic cell cycle                                        | 16  | 1 | 0.023795247 | 0.038247575 [APP]          |
| GO:0051262 | protein tetramerization                                                          | 16  | 1 | 0.023795247 | 0.038247575 [CPSF7]        |
| GO:0051693 | actin filament capping                                                           | 17  | 1 | 0.025263793 | 0.039635412 [SPTBN1]       |
| GO:0001938 | positive regulation of endothelial cell proliferation                            | 17  | 1 | 0.025263793 | 0.039635412 [KDR]          |
| GO:0007409 | axonogenesis                                                                     | 18  | 1 | 0.026730163 | 0.041195898 [APP]          |

|            |                                                                     |     |   |             |                                    |
|------------|---------------------------------------------------------------------|-----|---|-------------|------------------------------------|
| GO:0014068 | positive regulation of phosphatidylinositol 3-kinase cascade        | 19  | 1 | 0.028194361 | 0.042698974 [KDR]                  |
| GO:0006888 | ER to Golgi vesicle-mediated transport                              | 19  | 1 | 0.028194361 | 0.042698974 [SEC24C]               |
| GO:0006953 | acute-phase response                                                | 20  | 1 | 0.029656389 | 0.043898157 [CD163]                |
| GO:0016310 | phosphorylation                                                     | 20  | 1 | 0.029656389 | 0.043898157 [UGP2]                 |
| GO:0031175 | neuron projection development                                       | 21  | 1 | 0.03111625  | 0.045041202 [APP]                  |
| GO:0043410 | positive regulation of MAPK cascade                                 | 21  | 1 | 0.03111625  | 0.045041202 [KDR]                  |
| GO:0006468 | protein phosphorylation                                             | 185 | 2 | 0.031780566 | 0.045252763 [APP, CSNK1E]          |
| GO:0000375 | RNA splicing, via transesterification reactions                     | 22  | 1 | 0.032573949 | 0.045883735 [MPHOSPH10]            |
| GO:0071300 | cellular response to retinoic acid                                  | 23  | 1 | 0.034029488 | 0.047173153 [FZD4]                 |
| GO:0060070 | canonical Wnt receptor signaling pathway                            | 23  | 1 | 0.034029488 | 0.047173153 [FZD4]                 |
| GO:0000184 | nuclear-transcribed mRNA catabolic process, nonsense-mediated decay | 27  | 1 | 0.039830107 | 0.0543515 [RNPS1]                  |
| GO:0007219 | Notch signaling pathway                                             | 30  | 1 | 0.044158045 | 0.059636123 [APP]                  |
| GO:0006928 | cellular component movement                                         | 31  | 1 | 0.045596417 | 0.060950313 [ABI1]                 |
| GO:0018108 | peptidyl-tyrosine phosphorylation                                   | 32  | 1 | 0.047032658 | 0.062235133 [KDR]                  |
| GO:0006096 | glycolysis                                                          | 37  | 1 | 0.054181993 | 0.070978411 [OGDH]                 |
| GO:0042493 | response to drug                                                    | 38  | 1 | 0.055605508 | 0.071766715 [SRP68]                |
| GO:0030521 | androgen receptor signaling pathway                                 | 38  | 1 | 0.055605508 | 0.071766715 [NCOA2]                |
| GO:0070374 | positive regulation of ERK1 and ERK2 cascade                        | 39  | 1 | 0.057026913 | 0.072529375 [KDR]                  |
| GO:0006979 | response to oxidative stress                                        | 40  | 1 | 0.058446211 | 0.073619747 [NDUFS2]               |
| GO:0030182 | neuron differentiation                                              | 42  | 1 | 0.061278499 | 0.076452222 [FZD4]                 |
| GO:0030036 | actin cytoskeleton organization                                     | 43  | 1 | 0.062691495 | 0.077113482 [FERMT2]               |
| GO:0051260 | protein homooligomerization                                         | 43  | 1 | 0.062691495 | 0.077113482 [LONP1]                |
| GO:0030335 | positive regulation of cell migration                               | 46  | 1 | 0.066917925 | 0.081168965 [KDR]                  |
| GO:0010923 | negative regulation of phosphatase activity                         | 50  | 1 | 0.072523983 | 0.087161851 [MPHOSPH10]            |
| GO:0007050 | cell cycle arrest                                                   | 52  | 1 | 0.075314559 | 0.089692793 [TBRG4]                |
| GO:0044419 | interspecies interaction between organisms                          | 315 | 2 | 0.081653472 | 0.09636581 [DYNC1I2, KDR]          |
| GO:0006417 | regulation of translation                                           | 59  | 1 | 0.085016613 | 0.099439074 [APP]                  |
| GO:0016477 | cell migration                                                      | 67  | 1 | 0.095981953 | 0.111271114 [PRPF40A]              |
| GO:0007010 | cytoskeleton organization                                           | 71  | 1 | 0.101415988 | 0.116539425 [PRPF40A]              |
| GO:0015031 | protein transport                                                   | 383 | 2 | 0.113336186 | 0.129104699 [SEC61A1, TRAM1]       |
| GO:0006897 | endocytosis                                                         | 83  | 1 | 0.11752581  | 0.132723113 [APP]                  |
| GO:0007275 | multicellular organismal development                                | 822 | 3 | 0.126688538 | 0.14184785 [ANGPTL4, GADD45G, KDR] |

|            |                                            |      |   |             |                                   |
|------------|--------------------------------------------|------|---|-------------|-----------------------------------|
| GO:0000398 | nuclear mRNA splicing, via spliceosome     | 98   | 1 | 0.137263565 | 0.152385823 [U2AF1]               |
| GO:0001525 | angiogenesis                               | 102  | 1 | 0.14245312  | 0.156818141 [ANXA2]               |
| GO:0016192 | vesicle-mediated transport                 | 104  | 1 | 0.145036356 | 0.158331356 [SEC24C]              |
| GO:0009615 | response to virus                          | 114  | 1 | 0.157838024 | 0.170882489 [CCT5]                |
| GO:0030154 | cell differentiation                       | 484  | 2 | 0.16492438  | 0.177090932 [ANGPTL4, GADD45G]    |
| GO:0006954 | inflammatory response                      | 128  | 1 | 0.175443752 | 0.186854728 [CD163]               |
| GO:0006412 | translation                                | 130  | 1 | 0.177929084 | 0.187973467 [RPS20]               |
| GO:0008219 | cell death                                 | 136  | 1 | 0.185340896 | 0.194237259 [APP]                 |
| GO:0051301 | cell division                              | 285  | 1 | 0.349685077 | 0.363561469 [PRPF40A]             |
| GO:0006915 | apoptotic process                          | 321  | 1 | 0.384211762 | 0.39631292 [GADD45G]              |
| GO:0006355 | regulation of transcription, DNA-dependent | 1254 | 3 | 0.439328412 | 0.449625172 [NCOA2, PAF1, ZNF655] |
| GO:0007049 | cell cycle                                 | 405  | 1 | 0.45790799  | 0.465007338 [PRPF40A]             |
| GO:0006508 | proteolysis                                | 476  | 1 | 0.513370456 | 0.51731946 [LONP1]                |
| GO:0008150 | biological_process                         | 588  | 1 | 0.589702043 | 0.589702043 [RBM10]               |

---



Table S12-2. GO annotation analysis of the module eigengene in 15 postnatal highly LDE-specific modules (LDE\_blue).

| GO ID      | GO Name                                                      | Total Count | Diff Count | P Value     | FDR         | Gene                                               |
|------------|--------------------------------------------------------------|-------------|------------|-------------|-------------|----------------------------------------------------|
| GO:0044419 | interspecies interaction between organisms                   | 315         | 7          | 2.07335E-05 | 0.003006363 | [CBX5, CD81, EIF4H, ITGA5, SLC25A4, SLC25A6, VAPB] |
| GO:0006120 | mitochondrial electron transport, NADH to ubiquinone         | 42          | 3          | 0.000186725 | 0.013537596 | [NDUFA10, NDUFS1, NDUFS8]                          |
| GO:0045892 | negative regulation of transcription, DNA-dependent          | 284         | 5          | 0.000941318 | 0.045497016 | [AES, CBX3, CBX5, PER1, PHB2]                      |
| GO:0042254 | ribosome biogenesis                                          | 22          | 2          | 0.001519214 | 0.055071507 | [BOP1, GNL3L]                                      |
| GO:0006367 | transcription initiation from RNA polymerase II promoter     | 23          | 2          | 0.001661056 | 0.048170631 | [MED30, TAF12]                                     |
| GO:0051341 | regulation of oxidoreductase activity                        | 1           | 1          | 0.002620247 | 0.042215083 | [ECSIT]                                            |
| GO:0071310 | cellular response to organic substance                       | 1           | 1          | 0.002620247 | 0.042215083 | [CLEC3B]                                           |
| GO:0051089 | constitutive protein ectodomain proteolysis                  | 1           | 1          | 0.002620247 | 0.042215083 | [ADAM10]                                           |
| GO:0043128 | positive regulation of 1-phosphatidylinositol 4-kinase       | 1           | 1          | 0.002620247 | 0.042215083 | [CD81]                                             |
| GO:0045603 | positive regulation of endothelial cell differentiation      | 1           | 1          | 0.002620247 | 0.042215083 | [BTG1]                                             |
| GO:0046813 | virion attachment, binding of host cell surface receptor     | 1           | 1          | 0.002620247 | 0.042215083 | [CD81]                                             |
| GO:0006465 | signal peptide processing                                    | 1           | 1          | 0.002620247 | 0.042215083 | [LONP2]                                            |
| GO:0006810 | transport                                                    | 395         | 5          | 0.003937348 | 0.043916576 | [DCTN1, LRPPRC, NDUFA10, NDUFS1, NDUFS8]           |
| GO:0015858 | nucleoside transport                                         | 2           | 1          | 0.005233687 | 0.044640271 | [SLC29A1]                                          |
| GO:0000046 | autophagic vacuole fusion                                    | 2           | 1          | 0.005233687 | 0.044640271 | [WIPI2]                                            |
| GO:0010891 | negative regulation of sequestering of triglyceride          | 2           | 1          | 0.005233687 | 0.044640271 | [PNPLA2]                                           |
| GO:0010972 | negative regulation of G2/M transition of mitotic cell cycle | 2           | 1          | 0.005233687 | 0.044640271 | [FHL1]                                             |
| GO:0010756 | positive regulation of plasminogen activation                | 2           | 1          | 0.005233687 | 0.044640271 | [CLEC3B]                                           |
| GO:0031998 | regulation of fatty acid beta-oxidation                      | 2           | 1          | 0.005233687 | 0.044640271 | [LONP2]                                            |
| GO:0030150 | protein import into mitochondrial matrix                     | 2           | 1          | 0.005233687 | 0.044640271 | [GRPEL1]                                           |
| GO:0006633 | fatty acid biosynthetic process                              | 42          | 2          | 0.00547237  | 0.037785415 | [MCAT, MLYCD]                                      |
| GO:0008219 | cell death                                                   | 136         | 3          | 0.00557993  | 0.036776811 | [DCTN1, VAPB, ZFYVE27]                             |
| GO:0010898 | positive regulation of triglyceride catabolic process        | 3           | 1          | 0.007840339 | 0.044582318 | [PNPLA2]                                           |
| GO:0006085 | acetyl-CoA biosynthetic process                              | 3           | 1          | 0.007840339 | 0.044582318 | [MLYCD]                                            |
| GO:0048011 | nerve growth factor receptor signaling pathway               | 3           | 1          | 0.007840339 | 0.044582318 | [ZFYVE27]                                          |

|            |                                                                                          |     |   |             |                                                 |
|------------|------------------------------------------------------------------------------------------|-----|---|-------------|-------------------------------------------------|
| GO:0000463 | maturation of LSU-rRNA from tricistronic rRNA transcript (SSU-rRNA, 5.8S rRNA, LSU-rRNA) | 3   | 1 | 0.007840339 | 0.044582318 [BOP1]                              |
| GO:0006999 | nuclear pore organization                                                                | 3   | 1 | 0.007840339 | 0.044582318 [NUP133]                            |
| GO:0051881 | regulation of mitochondrial membrane potential                                           | 3   | 1 | 0.007840339 | 0.044582318 [NDUFS1]                            |
| GO:0006508 | proteolysis                                                                              | 476 | 5 | 0.008512859 | 0.042564295 [ADAM10, CTSZ, LONP2, THOP1, USP40] |
| GO:0007229 | integrin-mediated signaling pathway                                                      | 57  | 2 | 0.009888233 | 0.047793126 [ADAM10, ITGA5]                     |
| GO:0030308 | negative regulation of cell growth                                                       | 58  | 2 | 0.010223998 | 0.047821927 [BTG1, FHL1]                        |
| GO:0006915 | apoptotic process                                                                        | 321 | 4 | 0.010290598 | 0.046629274 [BRE, CLPTM1L, NDUFS1, SLC25A6]     |
| GO:0006942 | regulation of striated muscle contraction                                                | 4   | 1 | 0.010440219 | 0.043252337 [ATP1A2]                            |
| GO:0007131 | reciprocal meiotic recombination                                                         | 4   | 1 | 0.010440219 | 0.043252337 [KLHDC3]                            |
| GO:2000134 | negative regulation of G1/S transition of mitotic cell cycle                             | 4   | 1 | 0.010440219 | 0.043252337 [FHL1]                              |
| GO:0045663 | positive regulation of myoblast differentiation                                          | 4   | 1 | 0.010440219 | 0.043252337 [BTG1]                              |
| GO:0043043 | peptide biosynthetic process                                                             | 4   | 1 | 0.010440219 | 0.043252337 [MRPS35]                            |
| GO:0007126 | meiosis                                                                                  | 60  | 2 | 0.01091053  | 0.041632285 [KLHDC3, STAG2]                     |
| GO:0045070 | positive regulation of viral genome replication                                          | 5   | 1 | 0.013033346 | 0.046093542 [VAPB]                              |
| GO:0046488 | phosphatidylinositol metabolic process                                                   | 5   | 1 | 0.013033346 | 0.046093542 [CD81]                              |
| GO:0032321 | positive regulation of Rho GTPase activity                                               | 5   | 1 | 0.013033346 | 0.046093542 [NET1]                              |
| GO:0006379 | mRNA cleavage                                                                            | 5   | 1 | 0.013033346 | 0.046093542 [CPSF1]                             |
| GO:0071681 | cellular response to indole-3-methanol                                                   | 5   | 1 | 0.013033346 | 0.046093542 [JUP]                               |
| GO:0016477 | cell migration                                                                           | 67  | 2 | 0.013467979 | 0.044383113 [BTG1, FSCN1]                       |
| GO:0006457 | protein folding                                                                          | 68  | 2 | 0.013852592 | 0.044636129 [FKBP5, PPIL2]                      |
| GO:0031274 | positive regulation of pseudopodium assembly                                             | 6   | 1 | 0.015619737 | 0.04818855 [CDC42EP1]                           |
| GO:0006693 | prostaglandin metabolic process                                                          | 6   | 1 | 0.015619737 | 0.04818855 [PTGR2]                              |
| GO:0046034 | ATP metabolic process                                                                    | 6   | 1 | 0.015619737 | 0.04818855 [NDUFS1]                             |
| GO:0006625 | protein targeting to peroxisome                                                          | 7   | 1 | 0.018199408 | 0.050748351 [LONP2]                             |
| GO:0046718 | entry of virus into host cell                                                            | 7   | 1 | 0.018199408 | 0.050748351 [CD81]                              |
| GO:0048870 | cell motility                                                                            | 7   | 1 | 0.018199408 | 0.050748351 [FSCN1]                             |
| GO:0045429 | positive regulation of nitric oxide biosynthetic process                                 | 7   | 1 | 0.018199408 | 0.050748351 [HSP90AB1]                          |
| GO:0042769 | DNA damage response, detection of DNA damage                                             | 7   | 1 | 0.018199408 | 0.050748351 [MRPS35]                            |
| GO:0072659 | protein localization in plasma membrane                                                  | 7   | 1 | 0.018199408 | 0.050748351 [ZFYVE27]                           |
| GO:0019048 | virus-host interaction                                                                   | 7   | 1 | 0.018199408 | 0.050748351 [VAPB]                              |
| GO:0015031 | protein transport                                                                        | 383 | 4 | 0.018509437 | 0.04792622 [IPO4, NECAP1, NUP133, SFT2D1]       |
| GO:0006364 | rRNA processing                                                                          | 80  | 2 | 0.018829542 | 0.047899713 [BOP1, DKC1]                        |

|            |                                                                                    |     |   |             |                                     |
|------------|------------------------------------------------------------------------------------|-----|---|-------------|-------------------------------------|
| GO:0006814 | sodium ion transport                                                               | 82  | 2 | 0.019722089 | 0.049305223 [ATP1A2, SLC38A2]       |
| GO:0070301 | cellular response to hydrogen peroxide                                             | 8   | 1 | 0.020772378 | 0.050621763 [NET1]                  |
| GO:0006509 | membrane protein ectodomain proteolysis                                            | 8   | 1 | 0.020772378 | 0.050621763 [ADAM10]                |
| GO:0030968 | endoplasmic reticulum unfolded protein response                                    | 9   | 1 | 0.023338664 | 0.055477152 [VAPB]                  |
| GO:0008283 | cell proliferation                                                                 | 90  | 2 | 0.02346487  | 0.054877518 [BOP1, C2orf29]         |
| GO:0007155 | cell adhesion                                                                      | 420 | 4 | 0.024923903 | 0.05736454 [ENG, ITGA5, POSTN, TNC] |
| GO:0042744 | hydrogen peroxide catabolic process                                                | 10  | 1 | 0.025898282 | 0.057773091 [PXDN]                  |
| GO:0006378 | mRNA polyadenylation                                                               | 10  | 1 | 0.025898282 | 0.057773091 [CPSF1]                 |
| GO:0006661 | phosphatidylinositol biosynthetic process                                          | 10  | 1 | 0.025898282 | 0.057773091 [CD81]                  |
| GO:0051017 | actin filament bundle assembly                                                     | 11  | 1 | 0.028451251 | 0.059358724 [FSCN1]                 |
| GO:0071479 | cellular response to ionizing radiation                                            | 11  | 1 | 0.028451251 | 0.059358724 [NET1]                  |
| GO:0000045 | autophagic vacuole assembly                                                        | 11  | 1 | 0.028451251 | 0.059358724 [WIPI2]                 |
| GO:0045333 | cellular respiration                                                               | 11  | 1 | 0.028451251 | 0.059358724 [NDUFS1]                |
| GO:0035329 | hippo signaling cascade                                                            | 11  | 1 | 0.028451251 | 0.059358724 [TEAD4]                 |
| GO:0032981 | mitochondrial respiratory chain complex I assembly                                 | 11  | 1 | 0.028451251 | 0.059358724 [NDUFS8]                |
| GO:0030518 | intracellular steroid hormone receptor signaling pathway                           | 12  | 1 | 0.030997586 | 0.061570548 [MED30]                 |
| GO:0009887 | organ morphogenesis                                                                | 13  | 1 | 0.033537306 | 0.064409395 [FHL1]                  |
| GO:0030282 | bone mineralization                                                                | 13  | 1 | 0.033537306 | 0.064409395 [CLEC3B]                |
| GO:0006352 | transcription initiation, DNA-dependent                                            | 13  | 1 | 0.033537306 | 0.064409395 [TAF12]                 |
| GO:0007162 | negative regulation of cell adhesion                                               | 13  | 1 | 0.033537306 | 0.064409395 [ADAM10]                |
| GO:0001701 | in utero embryonic development                                                     | 14  | 1 | 0.036070427 | 0.066205213 [ADAM10]                |
| GO:0072593 | reactive oxygen species metabolic process                                          | 14  | 1 | 0.036070427 | 0.066205213 [NDUFS1]                |
| GO:0045768 | positive regulation of anti-apoptosis                                              | 14  | 1 | 0.036070427 | 0.066205213 [BRE]                   |
| GO:0071560 | cellular response to transforming growth factor beta                               | 15  | 1 | 0.038596966 | 0.067837091 [CLEC3B]                |
| GO:0055072 | iron ion homeostasis                                                               | 15  | 1 | 0.038596966 | 0.067837091 [SFXN4]                 |
| GO:0030198 | extracellular matrix organization                                                  | 15  | 1 | 0.038596966 | 0.067837091 [PXDN]                  |
| GO:0007031 | peroxisome organization                                                            | 15  | 1 | 0.038596966 | 0.067837091 [LONP2]                 |
| GO:0050731 | positive regulation of peptidyl-tyrosine phosphorylation                           | 16  | 1 | 0.04111694  | 0.070140662 [CD81]                  |
| GO:0045739 | positive regulation of DNA repair                                                  | 18  | 1 | 0.046137261 | 0.077339918 [BRE]                   |
| GO:0000187 | activation of MAPK activity                                                        | 18  | 1 | 0.046137261 | 0.077339918 [CD81]                  |
| GO:0051091 | positive regulation of sequence-specific DNA binding transcription factor activity | 20  | 1 | 0.051131526 | 0.08425081 [TAF12]                  |
| GO:0031572 | G2/M transition DNA damage checkpoint                                              | 21  | 1 | 0.053618929 | 0.086386052 [BRE]                   |
| GO:0031175 | neuron projection development                                                      | 21  | 1 | 0.053618929 | 0.086386052 [ZFYVE27]               |

|            |                                                                 |     |   |             |                              |
|------------|-----------------------------------------------------------------|-----|---|-------------|------------------------------|
| GO:0008104 | protein localization                                            | 21  | 1 | 0.053618929 | 0.086386052 [CD81]           |
| GO:0051726 | regulation of cell cycle                                        | 22  | 1 | 0.056099868 | 0.087467535 [BOP1]           |
| GO:0006406 | mRNA export from nucleus                                        | 22  | 1 | 0.056099868 | 0.087467535 [NUP133]         |
| GO:0000375 | RNA splicing, via transesterification reactions                 | 22  | 1 | 0.056099868 | 0.087467535 [PRPF8]          |
| GO:0008380 | RNA splicing                                                    | 150 | 2 | 0.059205973 | 0.090367011 [PRPF38B, PRPF8] |
| GO:0042147 | retrograde transport, endosome to Golgi                         | 24  | 1 | 0.06104242  | 0.092199488 [VPS26A]         |
| GO:0006338 | chromatin remodeling                                            | 25  | 1 | 0.063504066 | 0.094928759 [CBX3]           |
| GO:0043966 | histone H3 acetylation                                          | 27  | 1 | 0.068408182 | 0.100193803 [TAF12]          |
| GO:0010212 | response to ionizing radiation                                  | 27  | 1 | 0.068408182 | 0.100193803 [BRE]            |
| GO:0090090 | negative regulation of canonical Wnt receptor signaling pathway | 27  | 1 | 0.068408182 | 0.100193803 [AES]            |
| GO:0060271 | cilium morphogenesis                                            | 28  | 1 | 0.070850685 | 0.10171633 [ASAP1]           |
| GO:0001503 | ossification                                                    | 29  | 1 | 0.07328684  | 0.104182272 [CLEC3B]         |
| GO:0007219 | Notch signaling pathway                                         | 30  | 1 | 0.075716662 | 0.106591418 [ADAM10]         |
| GO:0008152 | metabolic process                                               | 32  | 1 | 0.080557376 | 0.111778178 [MCAT]           |
| GO:0001666 | response to hypoxia                                             | 32  | 1 | 0.080557376 | 0.111778178 [HMOX2]          |
| GO:0006302 | double-strand break repair                                      | 33  | 1 | 0.082968301 | 0.113494373 [BRE]            |
| GO:0045766 | positive regulation of angiogenesis                             | 34  | 1 | 0.085372958 | 0.115692326 [BTG1]           |
| GO:0006986 | response to unfolded protein                                    | 35  | 1 | 0.087771364 | 0.117841183 [HSP90AB1]       |
| GO:0006914 | autophagy                                                       | 36  | 1 | 0.090163536 | 0.119942318 [WIPI2]          |
| GO:0007517 | muscle organ development                                        | 38  | 1 | 0.094929239 | 0.124567779 [FHL1]           |
| GO:0030521 | androgen receptor signaling pathway                             | 38  | 1 | 0.094929239 | 0.124567779 [MED30]          |
| GO:0001558 | regulation of cell growth                                       | 39  | 1 | 0.097302802 | 0.125972378 [NET1]           |
| GO:0006979 | response to oxidative stress                                    | 40  | 1 | 0.099670195 | 0.127895383 [NDUFS8]         |
| GO:0007267 | cell-cell signaling                                             | 42  | 1 | 0.104386532 | 0.132772344 [ADAM10]         |
| GO:0030036 | actin cytoskeleton organization                                 | 43  | 1 | 0.106735508 | 0.134579554 [FSCN1]          |
| GO:0006631 | fatty acid metabolic process                                    | 50  | 1 | 0.123008213 | 0.153760266 [HADHA]          |
| GO:0051028 | mRNA transport                                                  | 60  | 1 | 0.145746396 | 0.179857254 [LRPPRC]         |
| GO:0030030 | cell projection organization                                    | 60  | 1 | 0.145746396 | 0.179857254 [ASAP1]          |
| GO:0042981 | regulation of apoptotic process                                 | 65  | 1 | 0.156895341 | 0.1903751 [BTG1]             |
| GO:0055114 | oxidation-reduction process                                     | 65  | 1 | 0.156895341 | 0.1903751 [PXDN]             |
| GO:0008360 | regulation of cell shape                                        | 67  | 1 | 0.161314423 | 0.193310672 [CDC42EP1]       |
| GO:0006897 | endocytosis                                                     | 83  | 1 | 0.195850307 | 0.231822812 [NECAP1]         |
| GO:0043065 | positive regulation of apoptotic process                        | 83  | 1 | 0.195850307 | 0.231822812 [NET1]           |

|            |                                                                      |      |   |             |                                         |
|------------|----------------------------------------------------------------------|------|---|-------------|-----------------------------------------|
| GO:0016055 | Wnt receptor signaling pathway                                       | 87   | 1 | 0.204261651 | 0.237895095 [AES]                       |
| GO:0016042 | lipid catabolic process                                              | 87   | 1 | 0.204261651 | 0.237895095 [PNPLA2]                    |
| GO:0006974 | response to DNA damage stimulus                                      | 93   | 1 | 0.216715401 | 0.249394707 [BRE]                       |
| GO:0000398 | nuclear mRNA splicing, via spliceosome                               | 98   | 1 | 0.226945786 | 0.25911133 [PRPF8]                      |
| GO:0006813 | potassium ion transport                                              | 102  | 1 | 0.235034632 | 0.264186215 [ATP1A2]                    |
| GO:0008284 | positive regulation of cell proliferation                            | 102  | 1 | 0.235034632 | 0.264186215 [CD81]                      |
| GO:0008285 | negative regulation of cell proliferation                            | 102  | 1 | 0.235034632 | 0.264186215 [BTG1]                      |
| GO:0045087 | innate immune response                                               | 103  | 1 | 0.237043699 | 0.262376614 [ECSIT]                     |
| GO:0006950 | response to stress                                                   | 104  | 1 | 0.239047536 | 0.262590096 [HSP90AB1]                  |
| GO:0000122 | negative regulation of transcription from RNA polymerase II promoter | 117  | 1 | 0.264627504 | 0.28850367 [NCOR2]                      |
| GO:0006412 | translation                                                          | 130  | 1 | 0.289354811 | 0.313107818 [MRPL36]                    |
| GO:0006397 | mRNA processing                                                      | 144  | 1 | 0.315062953 | 0.33840095 [PRPF38B]                    |
| GO:0006468 | protein phosphorylation                                              | 185  | 1 | 0.385166301 | 0.410655247 [ADAM10]                    |
| GO:0007399 | nervous system development                                           | 214  | 1 | 0.430409361 | 0.455542755 [DCTN1]                     |
| GO:0006955 | immune response                                                      | 220  | 1 | 0.439349526 | 0.461635372 [PXDN]                      |
| GO:0016568 | chromatin modification                                               | 221  | 1 | 0.440825969 | 0.459854428 [BRE]                       |
| GO:0051301 | cell division                                                        | 285  | 1 | 0.527720044 | 0.546567189 [STAG2]                     |
| GO:0006355 | regulation of transcription, DNA-dependent                           | 1254 | 4 | 0.573430654 | 0.58969819 [BTG1, EWSR1, LRPPRC, NCOR2] |
| GO:0045893 | positive regulation of transcription, DNA-dependent                  | 334  | 1 | 0.585074666 | 0.597435398 [MED30]                     |
| GO:0008150 | biological_process                                                   | 588  | 1 | 1           | 1 [BRP44L]                              |
| GO:0007275 | multicellular organismal development                                 | 822  | 2 | 1           | 1 [EPAS1, FHL1]                         |
| GO:0030154 | cell differentiation                                                 | 484  | 1 | 1           | 1 [FHL1]                                |

---

Table S12-3. GO annotation analysis of the module eigengene in 15 postnatal highly LDE-specific modules (LDE\_darkgrey).

| GO ID      | GO Name                                                             | Total Count | Diff Count | P Value | FDR         | Gene                          |
|------------|---------------------------------------------------------------------|-------------|------------|---------|-------------|-------------------------------|
| GO:0006493 | protein O-linked glycosylation                                      |             | 4          | 1       | 0.00236759  | 0.037881 [TRAK1]              |
| GO:0006561 | proline biosynthetic process                                        |             | 4          | 1       | 0.00236759  | 0.037881 [ALDH18A1]           |
| GO:0040019 | positive regulation of embryonic development                        |             | 5          | 1       | 0.002958645 | 0.023669 [RBM19]              |
| GO:0006644 | phospholipid metabolic process                                      |             | 7          | 1       | 0.004139745 | 0.024838 [GPX4]               |
| GO:0006605 | protein targeting                                                   |             | 11         | 1       | 0.00649791  | 0.03119 [TRAK1]               |
| GO:0008333 | endosome to lysosome transport                                      |             | 14         | 1       | 0.008263009 | 0.033052 [TRAK1]              |
| GO:0006325 | chromatin organization                                              |             | 15         | 1       | 0.008850705 | 0.028322 [HMGN2]              |
| GO:0007031 | peroxisome organization                                             |             | 15         | 1       | 0.008850705 | 0.028322 [PEX11B]             |
| GO:0007275 | multicellular organismal development                                |             | 822        | 3       | 0.012349526 | 0.032932 [GPX4, PRRX1, RBM19] |
| GO:0000184 | nuclear-transcribed mRNA catabolic process, nonsense-mediated decay |             | 27         | 1       | 0.015876989 | 0.038105 [RBM8A]              |
| GO:0006357 | regulation of transcription from RNA polymerase II promoter         |             | 38         | 1       | 0.022275656 | 0.048601 [TRAK1]              |
| GO:0006810 | transport                                                           |             | 395        | 2       | 0.022771803 | 0.045544 [ETFA, RBM8A]        |
| GO:0007229 | integrin-mediated signaling pathway                                 |             | 57         | 1       | 0.033233791 | 0.061355 [ITGA9]              |
| GO:0008033 | tRNA processing                                                     |             | 59         | 1       | 0.034380385 | 0.056905 [TRMT6]              |
| GO:0006417 | regulation of translation                                           |             | 59         | 1       | 0.034380385 | 0.056905 [RBM8A]              |
| GO:0055114 | oxidation-reduction process                                         |             | 65         | 1       | 0.037812327 | 0.056718 [GPX4]               |
| GO:0006629 | lipid metabolic process                                             |             | 69         | 1       | 0.040093769 | 0.056603 [GDE1]               |
| GO:0000398 | nuclear mRNA splicing, via spliceosome                              |             | 98         | 1       | 0.056479362 | 0.075306 [RBM8A]              |
| GO:0006412 | translation                                                         |             | 130        | 1       | 0.074247865 | 0.093787 [MRPL42]             |
| GO:0007165 | signal transduction                                                 |             | 141        | 1       | 0.080281138 | 0.096337 [PEX11B]             |
| GO:0016568 | chromatin modification                                              |             | 221        | 1       | 0.123036066 | 0.140613 [HIRA]               |
| GO:0007155 | cell adhesion                                                       |             | 420        | 1       | 0.221260916 | 0.241376 [ITGA9]              |
| GO:0008150 | biological_process                                                  |             | 588        | 1       | 0.295867218 | 0.308731 [RPUSD1]             |
| GO:0006355 | regulation of transcription, DNA-dependent                          |             | 1254       | 1       | 0.529477391 | 0.529477 [HMGN2]              |

Table S12-4. GO annotation analysis of the module eigengene in 15 postnatal highly LDE-specific modules (LDE\_green).

| GO ID      | GO Name                                                                           | Total Count | Diff Count | P Value     | FDR         | Gene                                          |
|------------|-----------------------------------------------------------------------------------|-------------|------------|-------------|-------------|-----------------------------------------------|
| GO:0006486 | protein glycosylation                                                             | 17          | 3          | 3.60642E-06 | 0.000367854 | [DAD1, DDOST, FUT1]                           |
| GO:0015813 | L-glutamate transport                                                             | 5           | 2          | 3.10727E-05 | 0.001584708 | [ARL6IP5, SLC25A12]                           |
| GO:0015031 | protein transport                                                                 | 383         | 6          | 6.42453E-05 | 0.002184342 | [NUP37, NUP93, PDCD6IP, RAB21, RUFY1, SCAMP1] |
| GO:0006275 | regulation of DNA replication                                                     | 7           | 2          | 6.51022E-05 | 0.001660105 | [PPP2R1A, SMC3]                               |
| GO:0006916 | anti-apoptosis                                                                    | 84          | 3          | 0.00046386  | 0.00946275  | [BAG3, MCL1, PEA15]                           |
| GO:0051301 | cell division                                                                     | 285         | 4          | 0.001703158 | 0.028953684 | [CDC37L1, NUP37, PDCD6IP, SMC3]               |
| GO:0046325 | negative regulation of glucose import                                             | 1           | 1          | 0.001777211 | 0.022659436 | [PEA15]                                       |
| GO:0070267 | oncosis                                                                           | 1           | 1          | 0.001777211 | 0.022659436 | [TMEM123]                                     |
| GO:0048738 | cardiac muscle tissue development                                                 | 1           | 1          | 0.001777211 | 0.022659436 | [NDUFV2]                                      |
| GO:0006915 | apoptotic process                                                                 | 321         | 4          | 0.002618662 | 0.026710352 | [DAD1, MCL1, PDCD6IP, UBE2D3]                 |
| GO:0048592 | eye morphogenesis                                                                 | 2           | 1          | 0.003551303 | 0.030186078 | [COL5A2]                                      |
| GO:0015810 | aspartate transport                                                               | 2           | 1          | 0.003551303 | 0.030186078 | [SLC25A12]                                    |
| GO:0043490 | malate-aspartate shuttle                                                          | 2           | 1          | 0.003551303 | 0.030186078 | [SLC25A12]                                    |
| GO:0007059 | chromosome segregation                                                            | 55          | 2          | 0.004356224 | 0.031738205 | [NUP37, PPP2R1A]                              |
| GO:0051028 | mRNA transport                                                                    | 60          | 2          | 0.005162576 | 0.035105514 | [NUP37, NUP93]                                |
| GO:0042518 | negative regulation of tyrosine phosphorylation of Stat3 protein                  | 3           | 1          | 0.005322283 | 0.031021308 | [PPP2R1A]                                     |
| GO:0019932 | second-messenger-mediated signaling                                               | 3           | 1          | 0.005322283 | 0.031021308 | [PPP2R1A]                                     |
| GO:2001240 | negative regulation of extrinsic apoptotic signaling pathway in absence of ligand | 3           | 1          | 0.005322283 | 0.031021308 | [MCL1]                                        |
| GO:0006467 | protein thiol-disulfide exchange                                                  | 3           | 1          | 0.005322283 | 0.031021308 | [PIGK]                                        |
| GO:0006457 | protein folding                                                                   | 68          | 2          | 0.006583628 | 0.033576502 | [BAG3, FKBP9]                                 |
| GO:0031032 | actomyosin structure organization                                                 | 4           | 1          | 0.007090156 | 0.034437901 | [CDC42BPB]                                    |
| GO:0016255 | attachment of GPI anchor to protein                                               | 5           | 1          | 0.008854927 | 0.039269676 | [PIGK]                                        |
| GO:0006729 | tetrahydrobiopterin biosynthetic process                                          | 5           | 1          | 0.008854927 | 0.039269676 | [QDPR]                                        |
| GO:0007062 | sister chromatid cohesion                                                         | 5           | 1          | 0.008854927 | 0.039269676 | [SMC3]                                        |
| GO:0006364 | rRNA processing                                                                   | 80          | 2          | 0.009008119 | 0.036753124 | [DCAF13, PA2G4]                               |
| GO:0034097 | response to cytokine stimulus                                                     | 6           | 1          | 0.010616601 | 0.041649743 | [DDOST]                                       |
| GO:0000188 | inactivation of MAPK activity                                                     | 7           | 1          | 0.012375184 | 0.045081029 | [PPP2R1A]                                     |
| GO:0030111 | regulation of Wnt receptor signaling pathway                                      | 7           | 1          | 0.012375184 | 0.045081029 | [PPP2R1A]                                     |
| GO:0071526 | semaphorin-plexin signaling pathway                                               | 7           | 1          | 0.012375184 | 0.045081029 | [PLXND1]                                      |
| GO:0016567 | protein ubiquitination                                                            | 99          | 2          | 0.013531744 | 0.04600793  | [DCAF13, UBE2D3]                              |
| GO:0001709 | cell fate determination                                                           | 8           | 1          | 0.014130682 | 0.045756493 | [MCL1]                                        |

|            |                                                           |     |   |             |             |                              |
|------------|-----------------------------------------------------------|-----|---|-------------|-------------|------------------------------|
| GO:0019725 | cellular homeostasis                                      | 8   | 1 | 0.014130682 | 0.045756493 | [MCL1]                       |
| GO:0001525 | angiogenesis                                              | 102 | 2 | 0.01431951  | 0.044260303 | [PLXND1, SAT1]               |
| GO:0033138 | positive regulation of peptidyl-serine phosphorylation    | 9   | 1 | 0.015883099 | 0.045635945 | [SPRY2]                      |
| GO:0006513 | protein monoubiquitination                                | 9   | 1 | 0.015883099 | 0.045635945 | [UBE2D3]                     |
| GO:0042355 | L-fucose catabolic process                                | 9   | 1 | 0.015883099 | 0.045635945 | [FUT1]                       |
| GO:0006672 | ceramide metabolic process                                | 9   | 1 | 0.015883099 | 0.045635945 | [PPP2R1A]                    |
| GO:0051592 | response to calcium ion                                   | 10  | 1 | 0.01763244  | 0.046115613 | [SLC25A12]                   |
| GO:0007052 | mitotic spindle organization                              | 10  | 1 | 0.01763244  | 0.046115613 | [SMC3]                       |
| GO:0045765 | regulation of angiogenesis                                | 10  | 1 | 0.01763244  | 0.046115613 | [PLXND1]                     |
| GO:0006891 | intra-Golgi vesicle-mediated transport                    | 11  | 1 | 0.019378712 | 0.048210455 | [COPZ1]                      |
| GO:0008150 | biological_process                                        | 588 | 4 | 0.020880159 | 0.050708957 | [CCDC6, NRAP, SEPN1, ZFAND5] |
| GO:0043588 | skin development                                          | 12  | 1 | 0.02112192  | 0.048964451 | [COL5A2]                     |
| GO:0010033 | response to organic substance                             | 12  | 1 | 0.02112192  | 0.048964451 | [PPP2R1A]                    |
| GO:0006487 | protein N-linked glycosylation                            | 12  | 1 | 0.02112192  | 0.048964451 | [DDOST]                      |
| GO:0043542 | endothelial cell migration                                | 13  | 1 | 0.022862068 | 0.050694152 | [PLXND1]                     |
| GO:0005977 | glycogen metabolic process                                | 14  | 1 | 0.024599163 | 0.052273221 | [PPP1R3B]                    |
| GO:0030199 | collagen fibril organization                              | 14  | 1 | 0.024599163 | 0.052273221 | [COL5A2]                     |
| GO:0006890 | retrograde vesicle-mediated transport, Golgi to ER        | 14  | 1 | 0.024599163 | 0.052273221 | [COPZ1]                      |
| GO:0007165 | signal transduction                                       | 141 | 2 | 0.026247707 | 0.053545323 | [S100A11, SMC3]              |
| GO:0045931 | positive regulation of mitotic cell cycle                 | 16  | 1 | 0.028064211 | 0.055583487 | [USP2]                       |
| GO:0045595 | regulation of cell differentiation                        | 16  | 1 | 0.028064211 | 0.055583487 | [PPP2R1A]                    |
| GO:0006281 | DNA repair                                                | 147 | 2 | 0.028343924 | 0.054548685 | [SMC3, UBE2D3]               |
| GO:0042476 | odontogenesis                                             | 17  | 1 | 0.029792176 | 0.05627411  | [ZNF22]                      |
| GO:0030155 | regulation of cell adhesion                               | 18  | 1 | 0.031517108 | 0.058449909 | [PPP2R1A]                    |
| GO:0007416 | synapse assembly                                          | 20  | 1 | 0.034957894 | 0.063109827 | [PLXND1]                     |
| GO:0051897 | positive regulation of protein kinase B signaling cascade | 20  | 1 | 0.034957894 | 0.063109827 | [SPRY2]                      |
| GO:0007049 | cell cycle                                                | 405 | 3 | 0.035698653 | 0.062780389 | [CCNDBP1, PDCD6IP, USP2]     |
| GO:0031532 | actin cytoskeleton reorganization                         | 21  | 1 | 0.036673759 | 0.063402092 | [CDC42BPB]                   |
| GO:0030334 | regulation of cell migration                              | 22  | 1 | 0.038386613 | 0.065257241 | [PLXND1]                     |
| GO:0070979 | protein K11-linked ubiquitination                         | 26  | 1 | 0.045208012 | 0.075593725 | [UBE2D3]                     |
| GO:0015992 | proton transport                                          | 28  | 1 | 0.048600776 | 0.079956115 | [ATP6AP1]                    |
| GO:0016579 | protein deubiquitination                                  | 29  | 1 | 0.050292692 | 0.081426264 | [USP2]                       |
| GO:0050821 | protein stabilization                                     | 31  | 1 | 0.053667619 | 0.085532768 | [USP2]                       |
| GO:0042110 | T cell activation                                         | 32  | 1 | 0.05535064  | 0.086857927 | [DDOST]                      |
| GO:0006461 | protein complex assembly                                  | 33  | 1 | 0.057030706 | 0.088138363 | [PPP2R1A]                    |
| GO:0070936 | protein K48-linked ubiquitination                         | 34  | 1 | 0.058707822 | 0.089376087 | [UBE2D3]                     |
| GO:0008643 | carbohydrate transport                                    | 35  | 1 | 0.060381993 | 0.089911873 | [PEA15]                      |
| GO:0006986 | response to unfolded protein                              | 35  | 1 | 0.060381993 | 0.089911873 | [UBE2J2]                     |



|            |                                                                      |      |   |             |             |                        |
|------------|----------------------------------------------------------------------|------|---|-------------|-------------|------------------------|
| GO:0000209 | protein polyubiquitination                                           | 37   | 1 | 0.063721523 | 0.092192841 | [UBE2D3]               |
| GO:0006470 | protein dephosphorylation                                            | 37   | 1 | 0.063721523 | 0.092192841 | [PPP2R1A]              |
| GO:0007517 | muscle organ development                                             | 38   | 1 | 0.065386891 | 0.092631429 | [USP2]                 |
| GO:0043161 | proteasomal ubiquitin-dependent protein catabolic process            | 39   | 1 | 0.067049335 | 0.093048056 | [UBE2D3]               |
| GO:0070374 | positive regulation of ERK1 and ERK2 cascade                         | 39   | 1 | 0.067049335 | 0.093048056 | [SPRY2]                |
| GO:0006120 | mitochondrial electron transport, NADH to ubiquinone                 | 42   | 1 | 0.072019171 | 0.097946072 | [NDUFV2]               |
| GO:0010628 | positive regulation of gene expression                               | 49   | 1 | 0.083514047 | 0.112084642 | [SPRY2]                |
| GO:0006631 | fatty acid metabolic process                                         | 50   | 1 | 0.085144656 | 0.112789025 | [LYPLA1]               |
| GO:0040008 | regulation of growth                                                 | 51   | 1 | 0.086772401 | 0.113471601 | [PPP2R1A]              |
| GO:0030308 | negative regulation of cell growth                                   | 58   | 1 | 0.098086839 | 0.125847266 | [PPP2R1A]              |
| GO:0005975 | carbohydrate metabolic process                                       | 58   | 1 | 0.098086839 | 0.125847266 | [PPP1R3B]              |
| GO:0006417 | regulation of translation                                            | 59   | 1 | 0.09969185  | 0.125537885 | [PA2G4]                |
| GO:0007126 | meiosis                                                              | 60   | 1 | 0.101294041 | 0.125999905 | [SMC3]                 |
| GO:0044419 | interspecies interaction between organisms                           | 315  | 2 | 0.108218989 | 0.132992011 | [CUL2, PDCD6IP]        |
| GO:0042981 | regulation of apoptotic process                                      | 65   | 1 | 0.109262873 | 0.132676345 | [PEA15]                |
| GO:0016477 | cell migration                                                       | 67   | 1 | 0.112430838 | 0.134917006 | [CDC42BPB]             |
| GO:0006629 | lipid metabolic process                                              | 69   | 1 | 0.11558768  | 0.137092365 | [LYPLA1]               |
| GO:0006917 | induction of apoptosis                                               | 79   | 1 | 0.131206389 | 0.15382818  | [PPP2R1A]              |
| GO:0006897 | endocytosis                                                          | 83   | 1 | 0.13737735  | 0.159232837 | [RUFY1]                |
| GO:0006810 | transport                                                            | 395  | 2 | 0.155931413 | 0.178707912 | [NDUFV2, PEA15]        |
| GO:0016192 | vesicle-mediated transport                                           | 104  | 1 | 0.169071857 | 0.191614771 | [COPZ1]                |
| GO:0000122 | negative regulation of transcription from RNA polymerase II promoter | 117  | 1 | 0.18811324  | 0.210852203 | [USP2]                 |
| GO:0043066 | negative regulation of apoptotic process                             | 118  | 1 | 0.18955999  | 0.210164337 | [SPRY2]                |
| GO:0006811 | ion transport                                                        | 455  | 2 | 0.193884419 | 0.212647428 | [ATP6AP1, CHRNA1]      |
| GO:0006412 | translation                                                          | 130  | 1 | 0.206723741 | 0.224317251 | [MRPL11]               |
| GO:0006508 | proteolysis                                                          | 476  | 2 | 0.207448713 | 0.222734408 | [PIGK, USP2]           |
| GO:0008380 | RNA splicing                                                         | 150  | 1 | 0.234536022 | 0.249194523 | [PPP2R1A]              |
| GO:0006468 | protein phosphorylation                                              | 185  | 1 | 0.280910068 | 0.295389968 | [CDC42BPB]             |
| GO:0007399 | nervous system development                                           | 214  | 1 | 0.317224373 | 0.330172306 | [NDUFV2]               |
| GO:0045893 | positive regulation of transcription, DNA-dependent                  | 334  | 1 | 0.449200185 | 0.462812312 | [ZXDC]                 |
| GO:0006355 | regulation of transcription, DNA-dependent                           | 1254 | 3 | 0.489902392 | 0.49970044  | [PPP2R1A, RRN3, ZNF22] |
| GO:0030154 | cell differentiation                                                 | 484  | 1 | 0.579248089 | 0.584983219 | [MCL1]                 |
| GO:0007275 | multicellular organismal development                                 | 822  | 2 | 0.659146281 | 0.659146281 | [MCL1, SPRY2]          |

Table S12-5. GO annotation analysis of the module eigengene in 15 postnatal highly LDE-specific modules (LDE\_grey60).

| GO ID      | GO Name                                                        | Total Count | Diff Count | P Value   | FDR       | Gene              |
|------------|----------------------------------------------------------------|-------------|------------|-----------|-----------|-------------------|
| GO:0070936 | protein K48-linked ubiquitination                              | 34          | 2          | 0.0002334 | 0.0093364 | [CDC34, UBE2G1]   |
| GO:0019059 | initiation of viral infection                                  | 1           | 1          | 0.0006608 | 0.0132152 | [ZNF639]          |
| GO:0016567 | protein ubiquitination                                         | 99          | 2          | 0.0019653 | 0.0262042 | [CDC34, DCAF6]    |
| GO:0006636 | unsaturated fatty acid biosynthetic process                    | 3           | 1          | 0.001981  | 0.0158481 | [DECR2]           |
| GO:0012501 | programmed cell death                                          | 3           | 1          | 0.001981  | 0.0158481 | [RNF130]          |
| GO:0070681 | glutaminyl-tRNA <sup>Gln</sup> biosynthesis via transamidation | 3           | 1          | 0.001981  | 0.0158481 | [GATC]            |
| GO:0043951 | negative regulation of cAMP-mediated signaling                 | 4           | 1          | 0.0026405 | 0.0150886 | [CDC34]           |
| GO:0006270 | DNA-dependent DNA replication initiation                       | 5           | 1          | 0.0032996 | 0.0155274 | [CDC34]           |
| GO:0032543 | mitochondrial translation                                      | 5           | 1          | 0.0032996 | 0.0155274 | [GATC]            |
| GO:0043923 | positive regulation by host of viral transcription             | 7           | 1          | 0.0046165 | 0.0184658 | [ZNF639]          |
| GO:0046328 | regulation of JNK cascade                                      | 9           | 1          | 0.0059317 | 0.0215697 | [MAPK8IP1]        |
| GO:0042273 | ribosomal large subunit biogenesis                             | 10          | 1          | 0.0065886 | 0.0219621 | [RPL35A]          |
| GO:0043922 | negative regulation by host of viral transcription             | 11          | 1          | 0.0072452 | 0.0222929 | [ZNF639]          |
| GO:0006352 | transcription initiation, DNA-dependent                        | 13          | 1          | 0.008557  | 0.0244487 | [TAF5]            |
| GO:0070534 | protein K63-linked ubiquitination                              | 22          | 1          | 0.0144397 | 0.0372637 | [UBE2G1]          |
| GO:0000082 | G1/S transition of mitotic cell cycle                          | 22          | 1          | 0.0144397 | 0.0372637 | [CDC34]           |
| GO:0006367 | transcription initiation from RNA polymerase II promoter       | 23          | 1          | 0.0150912 | 0.0355088 | [TAF5]            |
| GO:0051301 | cell division                                                  | 285         | 2          | 0.0151991 | 0.0337757 | [ANAPC13, KLHL22] |
| GO:0006464 | protein modification process                                   | 24          | 1          | 0.0157424 | 0.0331418 | [CDC34]           |
| GO:0070979 | protein K11-linked ubiquitination                              | 26          | 1          | 0.0170434 | 0.0340867 | [ANAPC13]         |
| GO:0015992 | proton transport                                               | 28          | 1          | 0.0183427 | 0.0349385 | [ATP6V1G1]        |
| GO:0001503 | ossification                                                   | 29          | 1          | 0.0189918 | 0.0345305 | [PDLIM7]          |
| GO:0030307 | positive regulation of cell growth                             | 30          | 1          | 0.0196404 | 0.0341572 | [ZNF639]          |
| GO:0000209 | protein polyubiquitination                                     | 37          | 1          | 0.0241693 | 0.0402821 | [CDC34]           |
| GO:0043161 | proteasomal ubiquitin-dependent protein catabolic process      | 39          | 1          | 0.0254595 | 0.0407353 | [CDC34]           |
| GO:0007049 | cell cycle                                                     | 405         | 2          | 0.0292665 | 0.0450254 | [ANAPC13, CDC34]  |
| GO:0006364 | rRNA processing                                                | 80          | 1          | 0.0515496 | 0.0763697 | [RPL35A]          |
| GO:0000398 | nuclear mRNA splicing, via spliceosome                         | 98          | 1          | 0.0627895 | 0.0896993 | [LSM2]            |
| GO:0016192 | vesicle-mediated transport                                     | 104         | 1          | 0.0665075 | 0.0901797 | [MAPK8IP1]        |
| GO:0006950 | response to stress                                             | 104         | 1          | 0.0665075 | 0.0901797 | [HSPA6]           |

|                                                                |      |   |           |           |           |
|----------------------------------------------------------------|------|---|-----------|-----------|-----------|
| GO:0006412 translation                                         | 130  | 1 | 0.0824548 | 0.1063933 | [RPL35A]  |
| GO:0007067 mitosis                                             | 159  | 1 | 0.099932  | 0.1249149 | [ANAPC13] |
| GO:0016568 chromatin modification                              | 221  | 1 | 0.1362252 | 0.1651215 | [TAF5]    |
| GO:0045892 negative regulation of transcription, DNA-dependent | 284  | 1 | 0.1716548 | 0.2019468 | [ZNF639]  |
| GO:0044419 interspecies interaction between organisms          | 315  | 1 | 0.1885692 | 0.2155076 | [TAF5]    |
| GO:0006915 apoptotic process                                   | 321  | 1 | 0.1918042 | 0.2131158 | [RNF130]  |
| GO:0006508 proteolysis                                         | 476  | 1 | 0.2711885 | 0.2931768 | [SEC11C]  |
| GO:0030154 cell differentiation                                | 484  | 1 | 0.2750745 | 0.2895521 | [PDLIM7]  |
| GO:0007275 multicellular organismal development                | 822  | 1 | 0.4221669 | 0.4329917 | [PDLIM7]  |
| GO:0006355 regulation of transcription, DNA-dependent          | 1254 | 1 | 0.5686909 | 0.5686909 | [RTF1]    |

---

Table S12-6. GO annotation analysis of the module eigengene in 15 postnatal highly LDE-specific modules (LDE\_lightyellow).

| GO ID      | GO Name                                                                          | Total Count | Diff Count | P Value     | FDR         | Gene           |
|------------|----------------------------------------------------------------------------------|-------------|------------|-------------|-------------|----------------|
| GO:0010452 | histone H3-K36 methylation                                                       | 1           | 1          | 0.000797466 | 0.019139192 | [SETD3]        |
| GO:0018023 | peptidyl-lysine trimethylation                                                   | 1           | 1          | 0.000797466 | 0.019139192 | [SETD3]        |
| GO:0048240 | sperm capacitation                                                               | 1           | 1          | 0.000797466 | 0.019139192 | [PRKACA]       |
| GO:2000810 | regulation of tight junction assembly                                            | 2           | 1          | 0.001594315 | 0.015305423 | [PRKACA]       |
| GO:0051963 | regulation of synapse assembly                                                   | 2           | 1          | 0.001594315 | 0.015305423 | [PDLIM5]       |
| GO:0045743 | positive regulation of fibroblast growth factor receptor                         | 2           | 1          | 0.001594315 | 0.015305423 | [NPTN]         |
| GO:0005978 | glycogen biosynthetic process                                                    | 3           | 1          | 0.002390546 | 0.016392316 | [GYS1]         |
| GO:0060291 | long-term synaptic potentiation                                                  | 4           | 1          | 0.00318616  | 0.017992435 | [NPTN]         |
| GO:0090026 | positive regulation of monocyte chemotaxis                                       | 4           | 1          | 0.00318616  | 0.017992435 | [CXCL12]       |
| GO:0071333 | cellular response to glucose stimulus                                            | 5           | 1          | 0.003981158 | 0.016617009 | [PRKACA]       |
| GO:0051168 | nuclear export                                                                   | 5           | 1          | 0.003981158 | 0.016617009 | [LSG1]         |
| GO:0018027 | peptidyl-lysine dimethylation                                                    | 5           | 1          | 0.003981158 | 0.016617009 | [SETD3]        |
| GO:0045667 | regulation of osteoblast differentiation                                         | 5           | 1          | 0.003981158 | 0.016617009 | [PRKACA]       |
| GO:0061001 | regulation of dendritic spine morphogenesis                                      | 6           | 1          | 0.00477554  | 0.015808685 | [PDLIM5]       |
| GO:0018026 | peptidyl-lysine monomethylation                                                  | 6           | 1          | 0.00477554  | 0.015808685 | [SETD3]        |
| GO:0061136 | regulation of proteasomal protein catabolic process                              | 7           | 1          | 0.005569307 | 0.016707921 | [PRKACA]       |
| GO:0071158 | positive regulation of cell cycle arrest                                         | 10          | 1          | 0.007946918 | 0.022438357 | [PRKACA]       |
| GO:0032436 | positive regulation of proteasomal ubiquitin-dependent protein catabolic process | 12          | 1          | 0.009528923 | 0.024723693 | [SUMO2]        |
| GO:0016925 | protein sumoylation                                                              | 12          | 1          | 0.009528923 | 0.024723693 | [SUMO2]        |
| GO:0007399 | nervous system development                                                       | 214         | 2          | 0.012666873 | 0.030400495 | [NPTN, TBCB]   |
| GO:0010976 | positive regulation of neuron projection development                             | 18          | 1          | 0.014260249 | 0.032594855 | [NPTN]         |
| GO:0006953 | acute-phase response                                                             | 20          | 1          | 0.015832473 | 0.034543578 | [ITIH4]        |
| GO:0018105 | peptidyl-serine phosphorylation                                                  | 21          | 1          | 0.016617672 | 0.033942478 | [PRKACA]       |
| GO:0001934 | positive regulation of protein phosphorylation                                   | 21          | 1          | 0.016617672 | 0.033942478 | [NPTN]         |
| GO:0008203 | cholesterol metabolic process                                                    | 24          | 1          | 0.018969617 | 0.036421664 | [VLDLR]        |
| GO:0007204 | elevation of cytosolic calcium ion concentration                                 | 28          | 1          | 0.022097045 | 0.040794545 | [NPTN]         |
| GO:0008202 | steroid metabolic process                                                        | 36          | 1          | 0.028322873 | 0.050351775 | [VLDLR]        |
| GO:0006979 | response to oxidative stress                                                     | 40          | 1          | 0.031421331 | 0.053865139 | [SELK]         |
| GO:0022900 | electron transport chain                                                         | 41          | 1          | 0.032194444 | 0.053287356 | [FRRS1]        |
| GO:0006869 | lipid transport                                                                  | 46          | 1          | 0.036051029 | 0.057681646 | [VLDLR]        |
| GO:0006810 | transport                                                                        | 395         | 2          | 0.039547363 | 0.061234626 | [FRRS1, VLDLR] |

|            |                                                     |      |   |             |                              |
|------------|-----------------------------------------------------|------|---|-------------|------------------------------|
| GO:0007155 | cell adhesion                                       | 420  | 2 | 0.044172185 | 0.066258277 [ITGA2B, NPTN]   |
| GO:0007229 | integrin-mediated signaling pathway                 | 57   | 1 | 0.044483037 | 0.0647026 [ITGA2B]           |
| GO:0005975 | carbohydrate metabolic process                      | 58   | 1 | 0.045246021 | 0.063876736 [PPP1R3C]        |
| GO:0006935 | chemotaxis                                          | 71   | 1 | 0.055111111 | 0.075580951 [CXCL12]         |
| GO:0008150 | biological_process                                  | 588  | 2 | 0.079800199 | 0.106400265 [FAM3A, N4BP2L2] |
| GO:0006397 | mRNA processing                                     | 144  | 1 | 0.108695004 | 0.141009735 [STRAP]          |
| GO:0008380 | RNA splicing                                        | 150  | 1 | 0.112965452 | 0.142693202 [STRAP]          |
| GO:0006468 | protein phosphorylation                             | 185  | 1 | 0.13748307  | 0.169209932 [PRKACA]         |
| GO:0016568 | chromatin modification                              | 221  | 1 | 0.162014033 | 0.194416839 [SETD3]          |
| GO:0044419 | interspecies interaction between organisms          | 315  | 1 | 0.222915164 | 0.260973851 [VCAM1]          |
| GO:0045893 | positive regulation of transcription, DNA-dependent | 334  | 1 | 0.234691634 | 0.26821901 [SETD3]           |
| GO:0015031 | protein transport                                   | 383  | 1 | 0.264268102 | 0.294996951 [LSG1]           |
| GO:0007049 | cell cycle                                          | 405  | 1 | 0.277183291 | 0.302381772 [PPP6C]          |
| GO:0006508 | proteolysis                                         | 476  | 1 | 0.317379462 | 0.338538093 [PLAU]           |
| GO:0030154 | cell differentiation                                | 484  | 1 | 0.321770097 | 0.335760101 [TBCB]           |
| GO:0007275 | multicellular organismal development                | 822  | 1 | 0.484177504 | 0.494479153 [TBCB]           |
| GO:0006355 | regulation of transcription, DNA-dependent          | 1254 | 1 | 1           | 1 [PNRC1]                    |

---

Table S12-7. GO annotation analysis of the module eigengene in 15 postnatal highly LDE-specific modules (LDE\_magenta).

| GO ID      | GO Name                                                                          | Total Count | Diff Count | P Value     | FDR         | Gene                                                |
|------------|----------------------------------------------------------------------------------|-------------|------------|-------------|-------------|-----------------------------------------------------|
| GO:0007275 | multicellular organismal development                                             | 822         | 7          | 2.23397E-05 | 0.001519098 | [BIN1, CAMK2G, CFDP1, EYA4, KIAA1279, PTPLA, STMN1] |
| GO:0051924 | regulation of calcium ion transport                                              | 7           | 2          | 2.24924E-05 | 0.000764743 | [CAMK2G, SLN]                                       |
| GO:0006633 | fatty acid biosynthetic process                                                  | 42          | 2          | 0.000900891 | 0.020420196 | [PRKAG3, PTPLA]                                     |
| GO:0030913 | paranodal junction assembly                                                      | 1           | 1          | 0.001048099 | 0.015837935 | [CD9]                                               |
| GO:0046950 | cellular ketone body metabolic process                                           | 1           | 1          | 0.001048099 | 0.015837935 | [OXCT1]                                             |
| GO:0007399 | nervous system development                                                       | 214         | 3          | 0.001486699 | 0.016849257 | [CAMK2G, KIAA1279, STMN1]                           |
| GO:0006839 | mitochondrial transport                                                          | 2           | 1          | 0.002095123 | 0.016760981 | [KIAA1279]                                          |
| GO:0002376 | immune system process                                                            | 2           | 1          | 0.002095123 | 0.016760981 | [ADSSL1]                                            |
| GO:0000042 | protein targeting to Golgi                                                       | 2           | 1          | 0.002095123 | 0.016760981 | [OPTN]                                              |
| GO:0014733 | regulation of skeletal muscle adaptation                                         | 2           | 1          | 0.002095123 | 0.016760981 | [CAMK2G]                                            |
| GO:0090161 | Golgi ribbon formation                                                           | 3           | 1          | 0.003141073 | 0.015821701 | [OPTN]                                              |
| GO:0045737 | positive regulation of cyclin-dependent protein kinase activity                  | 3           | 1          | 0.003141073 | 0.015821701 | [CCNY]                                              |
| GO:0042178 | xenobiotic catabolic process                                                     | 3           | 1          | 0.003141073 | 0.015821701 | [CRYZ]                                              |
| GO:0012501 | programmed cell death                                                            | 3           | 1          | 0.003141073 | 0.015821701 | [PKM2]                                              |
| GO:0006167 | AMP biosynthetic process                                                         | 3           | 1          | 0.003141073 | 0.015821701 | [ADSSL1]                                            |
| GO:0007342 | fusion of sperm to egg plasma membrane                                           | 3           | 1          | 0.003141073 | 0.015821701 | [CD9]                                               |
| GO:0032872 | regulation of stress-activated MAPK cascade                                      | 4           | 1          | 0.004185951 | 0.015813592 | [MAP2K2]                                            |
| GO:0090170 | regulation of Golgi inheritance                                                  | 4           | 1          | 0.004185951 | 0.015813592 | [MAP2K2]                                            |
| GO:2000641 | regulation of early endosome to late endosome transport                          | 4           | 1          | 0.004185951 | 0.015813592 | [MAP2K2]                                            |
| GO:0060828 | regulation of canonical Wnt receptor signaling pathway                           | 5           | 1          | 0.005229757 | 0.016934452 | [CCNY]                                              |
| GO:0045806 | negative regulation of endocytosis                                               | 5           | 1          | 0.005229757 | 0.016934452 | [PACSN3]                                            |
| GO:0034612 | response to tumor necrosis factor                                                | 5           | 1          | 0.005229757 | 0.016934452 | [NUB1]                                              |
| GO:0030073 | insulin secretion                                                                | 6           | 1          | 0.006272493 | 0.018150194 | [CAMK2G]                                            |
| GO:0043001 | Golgi to plasma membrane protein transport                                       | 6           | 1          | 0.006272493 | 0.018150194 | [OPTN]                                              |
| GO:0034341 | response to interferon-gamma                                                     | 7           | 1          | 0.00731416  | 0.019894516 | [NUB1]                                              |
| GO:0006810 | transport                                                                        | 395         | 3          | 0.008248241 | 0.021572323 | [DYNLT3, SNUPN, VLDLR]                              |
| GO:0006520 | cellular amino acid metabolic process                                            | 8           | 1          | 0.008354759 | 0.021041615 | [ATF4]                                              |
| GO:0006094 | gluconeogenesis                                                                  | 10          | 1          | 0.010432756 | 0.025336693 | [ATF4]                                              |
| GO:0032436 | positive regulation of proteasomal ubiquitin-dependent protein catabolic process | 12          | 1          | 0.012506493 | 0.029325569 | [NUB1]                                              |
| GO:0006730 | one-carbon metabolic process                                                     | 13          | 1          | 0.013541766 | 0.03069467  | [AHCY]                                              |

|                                                                |      |   |             |                                      |
|----------------------------------------------------------------|------|---|-------------|--------------------------------------|
| GO:0030154 cell differentiation                                | 484  | 3 | 0.01424672  | 0.03125087 [CAMK2G, KIAA1279, STMN1] |
| GO:0007346 regulation of mitotic cell cycle                    | 14   | 1 | 0.014575978 | 0.030973954 [DYNLT3]                 |
| GO:0006468 protein phosphorylation                             | 185  | 2 | 0.01619635  | 0.033374297 [CAMK2G, MAP2K2]         |
| GO:0006164 purine nucleotide biosynthetic process              | 16   | 1 | 0.016641221 | 0.033282441 [ADSSL1]                 |
| GO:0007030 Golgi organization                                  | 18   | 1 | 0.018702229 | 0.035823988 [OPTN]                   |
| GO:0000187 activation of MAPK activity                         | 18   | 1 | 0.018702229 | 0.035823988 [MAP2K2]                 |
| GO:0030168 platelet activation                                 | 20   | 1 | 0.020759011 | 0.038151696 [CD9]                    |
| GO:0000086 G2/M transition of mitotic cell cycle               | 22   | 1 | 0.022811576 | 0.040820715 [CCNY]                   |
| GO:0008203 cholesterol metabolic process                       | 24   | 1 | 0.024859932 | 0.043345522 [VLDLR]                  |
| GO:0051289 protein homotetramerization                         | 25   | 1 | 0.025882534 | 0.044000307 [CRYZ]                   |
| GO:0006928 cellular component movement                         | 31   | 1 | 0.031996153 | 0.05306679 [CD9]                     |
| GO:0051301 cell division                                       | 285  | 2 | 0.036059238 | 0.058381624 [CCNY, DYNLT3]           |
| GO:0008202 steroid metabolic process                           | 36   | 1 | 0.037062149 | 0.05860991 [VLDLR]                   |
| GO:0006096 glycolysis                                          | 37   | 1 | 0.038072231 | 0.058838903 [PKM2]                   |
| GO:0007517 muscle organ development                            | 38   | 1 | 0.039081277 | 0.059056152 [MYL1]                   |
| GO:0006511 ubiquitin-dependent protein catabolic process       | 40   | 1 | 0.041096263 | 0.060750998 [NUB1]                   |
| GO:0006366 transcription from RNA polymerase II promoter       | 46   | 1 | 0.047116453 | 0.067450922 [ATF4]                   |
| GO:0006869 lipid transport                                     | 46   | 1 | 0.047116453 | 0.067450922 [VLDLR]                  |
| GO:0006816 calcium ion transport                               | 50   | 1 | 0.051109355 | 0.070927269 [SLN]                    |
| GO:0007049 cell cycle                                          | 405  | 2 | 0.067402301 | 0.091667129 [CCNY, DYNLT3]           |
| GO:0006935 chemotaxis                                          | 71   | 1 | 0.071805052 | 0.09574007 [CXCL10]                  |
| GO:0006897 endocytosis                                         | 83   | 1 | 0.083432219 | 0.109103671 [RABEP1]                 |
| GO:0016055 Wnt receptor signaling pathway                      | 87   | 1 | 0.087276185 | 0.111976992 [CCNY]                   |
| GO:0016567 protein ubiquitination                              | 99   | 1 | 0.098713703 | 0.124306145 [NUB1]                   |
| GO:0009615 response to virus                                   | 114  | 1 | 0.112813575 | 0.139478601 [STMN1]                  |
| GO:0006954 inflammatory response                               | 128  | 1 | 0.125778637 | 0.152731202 [CXCL10]                 |
| GO:0008219 cell death                                          | 136  | 1 | 0.133103832 | 0.158790537 [OPTN]                   |
| GO:0006281 DNA repair                                          | 147  | 1 | 0.143078016 | 0.167746639 [EYA4]                   |
| GO:0006355 regulation of transcription, DNA-dependent          | 1254 | 3 | 0.143765177 | 0.165695459 [ATF4, EYA4, MLX]        |
| GO:0045944 positive regulation of transcription                | 158  | 1 | 0.152939906 | 0.173331894 [ATF4]                   |
| GO:0007067 mitosis                                             | 159  | 1 | 0.153830917 | 0.171483645 [DYNLT3]                 |
| GO:0016568 chromatin modification                              | 221  | 1 | 0.207318967 | 0.227382093 [EYA4]                   |
| GO:0044419 interspecies interaction between organisms          | 315  | 1 | 0.282162557 | 0.304556411 [BIN1]                   |
| GO:0006915 apoptotic process                                   | 321  | 1 | 0.286697654 | 0.304616257 [RABEP1]                 |
| GO:0045893 positive regulation of transcription, DNA-dependent | 334  | 1 | 0.296427755 | 0.310109036 [ATF4]                   |
| GO:0015031 protein transport                                   | 383  | 1 | 0.331949353 | 0.342008424 [RABEP1]                 |
| GO:0007155 cell adhesion                                       | 420  | 1 | 0.35760329  | 0.362940653 [CD9]                    |
| GO:0008150 biological_process                                  | 588  | 1 | 0.462468537 | 0.462468537 [CFDP1]                  |

Table S12-8. GO annotation analysis of the module eigengene in 15 postnatal highly LDE-specific modules (LDE\_midnightblue).

| GO ID      | GO Name                                                                                                                         | Total Count | Diff Count | P Value     | FDR         | Gene                                   |
|------------|---------------------------------------------------------------------------------------------------------------------------------|-------------|------------|-------------|-------------|----------------------------------------|
| GO:0015992 | proton transport                                                                                                                | 28          | 3          | 5.64309E-06 | 0.000558666 | [ATP5A1, ATP6V1B2, ATP6V1H]            |
| GO:0015031 | protein transport                                                                                                               | 383         | 5          | 0.000109741 | 0.005432189 | [ARF4, DNAJC19, RAB10, SEC22B, SEC31B] |
| GO:0016192 | vesicle-mediated transport                                                                                                      | 104         | 3          | 0.00029362  | 0.009689451 | [ARF4, SEC22B, SEC31B]                 |
| GO:0070979 | protein K11-linked ubiquitination                                                                                               | 26          | 2          | 0.00047383  | 0.011727298 | [ANAPC7, UBE2W]                        |
| GO:0035441 | cell migration involved in vasculogenesis                                                                                       | 1           | 1          | 0.001230377 | 0.015225911 | [PDGFRB]                               |
| GO:0035791 | platelet-derived growth factor receptor-beta signaling pathway                                                                  | 1           | 1          | 0.001230377 | 0.015225911 | [PDGFRB]                               |
| GO:0048388 | endosomal lumen acidification                                                                                                   | 1           | 1          | 0.001230377 | 0.015225911 | [CLCN3]                                |
| GO:0043353 | enucleate erythrocyte differentiation                                                                                           | 1           | 1          | 0.001230377 | 0.015225911 | [CEBPG]                                |
| GO:0072262 | metanephric glomerular mesangial cell proliferation involved in metanephros development                                         | 1           | 1          | 0.001230377 | 0.015225911 | [PDGFRB]                               |
| GO:0010626 | negative regulation of Schwann cell proliferation                                                                               | 1           | 1          | 0.001230377 | 0.015225911 | [RNF10]                                |
| GO:0060981 | cell migration involved in coronary angiogenesis                                                                                | 1           | 1          | 0.001230377 | 0.015225911 | [PDGFRB]                               |
| GO:0006811 | ion transport                                                                                                                   | 455         | 4          | 0.002394379 | 0.019753627 | [ATP6V1B2, ATP6V1H, CACNA2D1, CLCN3]   |
| GO:0032516 | positive regulation of phosphoprotein phosphatase activity                                                                      | 2           | 1          | 0.002459267 | 0.016231165 | [PDGFRB]                               |
| GO:0015991 | ATP hydrolysis coupled proton transport                                                                                         | 2           | 1          | 0.002459267 | 0.016231165 | [ATP6V1H]                              |
| GO:0061298 | retina vasculature development in camera-type eye                                                                               | 2           | 1          | 0.002459267 | 0.016231165 | [PDGFRB]                               |
| GO:0014911 | positive regulation of smooth muscle cell migration                                                                             | 2           | 1          | 0.002459267 | 0.016231165 | [PDGFRB]                               |
| GO:0031643 | positive regulation of myelination                                                                                              | 2           | 1          | 0.002459267 | 0.016231165 | [RNF10]                                |
| GO:0016477 | cell migration                                                                                                                  | 67          | 2          | 0.003121105 | 0.017166078 | [PDGFRB, SH3KBP1]                      |
| GO:0006457 | protein folding                                                                                                                 | 68          | 2          | 0.003213158 | 0.016742242 | [CWC27, DNAJC19]                       |
| GO:0035793 | positive regulation of metanephric mesenchymal cell migration by platelet-derived growth factor receptor-beta signaling pathway | 3           | 1          | 0.003686674 | 0.016221366 | [PDGFRB]                               |
| GO:0072277 | metanephric glomerular capillary formation                                                                                      | 3           | 1          | 0.003686674 | 0.016221366 | [PDGFRB]                               |
| GO:0006596 | polyamine biosynthetic process                                                                                                  | 3           | 1          | 0.003686674 | 0.016221366 | [AZIN1]                                |
| GO:0007035 | vacuolar acidification                                                                                                          | 3           | 1          | 0.003686674 | 0.016221366 | [ATP6V1H]                              |
| GO:0055003 | cardiac myofibril assembly                                                                                                      | 3           | 1          | 0.003686674 | 0.016221366 | [PDGFRB]                               |
| GO:0090280 | positive regulation of calcium ion import                                                                                       | 3           | 1          | 0.003686674 | 0.016221366 | [PDGFRB]                               |
| GO:0006897 | endocytosis                                                                                                                     | 83          | 2          | 0.004743768 | 0.01806281  | [ATP6V1H, SH3KBP1]                     |
| GO:0050921 | positive regulation of chemotaxis                                                                                               | 4           | 1          | 0.004912599 | 0.017369545 | [PDGFRB]                               |
| GO:0006885 | regulation of pH                                                                                                                | 4           | 1          | 0.004912599 | 0.017369545 | [CLCN3]                                |
| GO:0048806 | genitalia development                                                                                                           | 4           | 1          | 0.004912599 | 0.017369545 | [DNAJC19]                              |



|            |                                                                                    |     |   |             |                              |
|------------|------------------------------------------------------------------------------------|-----|---|-------------|------------------------------|
| GO:0046488 | phosphatidylinositol metabolic process                                             | 5   | 1 | 0.006137042 | 0.019920236 [PDGFRB]         |
| GO:0010863 | positive regulation of phospholipase C activity                                    | 5   | 1 | 0.006137042 | 0.019920236 [PDGFRB]         |
| GO:0000398 | nuclear mRNA splicing, via spliceosome                                             | 98  | 2 | 0.006548156 | 0.020258357 [CWC27, HNRNPH3] |
| GO:0006950 | response to stress                                                                 | 104 | 2 | 0.007344284 | 0.022032851 [HSF2, HSPB1]    |
| GO:0042267 | natural killer cell mediated cytotoxicity                                          | 6   | 1 | 0.007360008 | 0.020240021 [CEBPG]          |
| GO:0001889 | liver development                                                                  | 6   | 1 | 0.007360008 | 0.020240021 [CEBPG]          |
| GO:2000573 | positive regulation of DNA biosynthetic process                                    | 6   | 1 | 0.007360008 | 0.020240021 [PDGFRB]         |
| GO:0048008 | platelet-derived growth factor receptor signaling pathway                          | 6   | 1 | 0.007360008 | 0.020240021 [PDGFRB]         |
| GO:2000379 | positive regulation of reactive oxygen species metabolic process                   | 6   | 1 | 0.007360008 | 0.020240021 [PDGFRB]         |
| GO:0010842 | retina layer formation                                                             | 7   | 1 | 0.008581496 | 0.021508052 [TSPAN12]        |
| GO:0051924 | regulation of calcium ion transport                                                | 7   | 1 | 0.008581496 | 0.021508052 [PLN]            |
| GO:0009615 | response to virus                                                                  | 114 | 2 | 0.008763158 | 0.02115982 [CCT5, HSPB1]     |
| GO:0006754 | ATP biosynthetic process                                                           | 8   | 1 | 0.009801508 | 0.022831749 [ATP5A1]         |
| GO:0006626 | protein targeting to mitochondrion                                                 | 8   | 1 | 0.009801508 | 0.022831749 [DNAJC19]        |
| GO:0007281 | germ cell development                                                              | 9   | 1 | 0.011020048 | 0.023717059 [DZIP1]          |
| GO:0045078 | positive regulation of interferon-gamma biosynthetic process                       | 9   | 1 | 0.011020048 | 0.023717059 [CEBPG]          |
| GO:0045840 | positive regulation of mitosis                                                     | 9   | 1 | 0.011020048 | 0.023717059 [PDGFRB]         |
| GO:0006513 | protein monoubiquitination                                                         | 9   | 1 | 0.011020048 | 0.023717059 [UBE2W]          |
| GO:0001937 | negative regulation of endothelial cell proliferation                              | 9   | 1 | 0.011020048 | 0.023717059 [ATP5A1]         |
| GO:0043388 | positive regulation of DNA binding                                                 | 10  | 1 | 0.012237115 | 0.024229488 [CEBPG]          |
| GO:0048661 | positive regulation of smooth muscle cell proliferation                            | 10  | 1 | 0.012237115 | 0.024229488 [PDGFRB]         |
| GO:0045765 | regulation of angiogenesis                                                         | 10  | 1 | 0.012237115 | 0.024229488 [TSPAN12]        |
| GO:0043433 | negative regulation of sequence-specific DNA binding transcription factor activity | 12  | 1 | 0.014666841 | 0.027923409 [CEBPG]          |
| GO:0043552 | positive regulation of phosphatidylinositol 3-kinase activity                      | 13  | 1 | 0.015879504 | 0.029661715 [PDGFRB]         |
| GO:0042776 | mitochondrial ATP synthesis coupled proton transport                               | 14  | 1 | 0.017090701 | 0.031045494 [ATP5A1]         |
| GO:0043406 | positive regulation of MAP kinase activity                                         | 14  | 1 | 0.017090701 | 0.031045494 [PDGFRB]         |
| GO:0060326 | cell chemotaxis                                                                    | 15  | 1 | 0.018300436 | 0.032352556 [PDGFRB]         |
| GO:0045739 | positive regulation of DNA repair                                                  | 18  | 1 | 0.021920878 | 0.037742034 [CEBPG]          |
| GO:0030183 | B cell differentiation                                                             | 18  | 1 | 0.021920878 | 0.037742034 [CEBPG]          |
| GO:0014068 | positive regulation of phosphatidylinositol 3-kinase cascade                       | 19  | 1 | 0.023124778 | 0.038802593 [PDGFRB]         |
| GO:0051091 | positive regulation of sequence-specific DNA binding transcription factor activity | 20  | 1 | 0.024327223 | 0.040139917 [CEBPG]          |
| GO:0006464 | protein modification process                                                       | 24  | 1 | 0.029122493 | 0.047264373 [WDYHV1]         |
| GO:0048015 | phosphatidylinositol-mediated signaling                                            | 25  | 1 | 0.030317691 | 0.048410507 [PDGFRB]         |
| GO:0030433 | ER-associated protein catabolic process                                            | 26  | 1 | 0.031511446 | 0.049517986 [DNAJB9]         |
| GO:0043966 | histone H3 acetylation                                                             | 27  | 1 | 0.032703758 | 0.050588625 [TADA2A]         |

|            |                                                                      |      |   |             |             |                           |
|------------|----------------------------------------------------------------------|------|---|-------------|-------------|---------------------------|
| GO:0008150 | biological_process                                                   | 588  | 3 | 0.035863603 | 0.054623025 | [SLC35D2, TXNDC9, WBSR22] |
| GO:0009790 | embryo development                                                   | 31   | 1 | 0.037458616 | 0.055765458 | [ATP5A1]                  |
| GO:0006928 | cellular component movement                                          | 31   | 1 | 0.037458616 | 0.055765458 | [HSPB1]                   |
| GO:0018108 | peptidyl-tyrosine phosphorylation                                    | 32   | 1 | 0.038643741 | 0.055850078 | [PDGFRB]                  |
| GO:0007166 | cell surface receptor signaling pathway                              | 32   | 1 | 0.038643741 | 0.055850078 | [TSPAN12]                 |
| GO:0006986 | response to unfolded protein                                         | 35   | 1 | 0.042190531 | 0.059669466 | [HSPB1]                   |
| GO:0007517 | muscle organ development                                             | 38   | 1 | 0.045724478 | 0.063756666 | [UNC45B]                  |
| GO:0070374 | positive regulation of ERK1 and ERK2 cascade                         | 39   | 1 | 0.046899613 | 0.064486968 | [PDGFRB]                  |
| GO:0071260 | cellular response to mechanical stimulus                             | 42   | 1 | 0.050416505 | 0.067907946 | [GADD45A]                 |
| GO:0007267 | cell-cell signaling                                                  | 42   | 1 | 0.050416505 | 0.067907946 | [SH3KBP1]                 |
| GO:0006816 | calcium ion transport                                                | 50   | 1 | 0.059732733 | 0.078847208 | [CACNA2D1]                |
| GO:0007050 | cell cycle arrest                                                    | 52   | 1 | 0.062047738 | 0.080825343 | [GADD45A]                 |
| GO:0008033 | tRNA processing                                                      | 59   | 1 | 0.070106284 | 0.090136651 | [RPP30]                   |
| GO:0008360 | regulation of cell shape                                             | 67   | 1 | 0.079232862 | 0.100564787 | [SH3KBP1]                 |
| GO:0007275 | multicellular organismal development                                 | 822  | 3 | 0.080537828 | 0.100927151 | [DZIP1, PDGFRB, UNC45B]   |
| GO:0006629 | lipid metabolic process                                              | 69   | 1 | 0.081500735 | 0.10085716  | [ATP5A1]                  |
| GO:0007010 | cytoskeleton organization                                            | 71   | 1 | 0.083763125 | 0.102377153 | [SH3KBP1]                 |
| GO:0006916 | anti-apoptosis                                                       | 84   | 1 | 0.098335916 | 0.11872263  | [HSPB1]                   |
| GO:0006260 | DNA replication                                                      | 93   | 1 | 0.108291259 | 0.129166682 | [MCM6]                    |
| GO:0007601 | visual perception                                                    | 97   | 1 | 0.112681151 | 0.132802785 | [DNAJC19]                 |
| GO:0008284 | positive regulation of cell proliferation                            | 102  | 1 | 0.118138697 | 0.137596836 | [PDGFRB]                  |
| GO:0030154 | cell differentiation                                                 | 484  | 2 | 0.119594611 | 0.137672867 | [DZIP1, UNC45B]           |
| GO:0046777 | protein autophosphorylation                                          | 107  | 1 | 0.123563294 | 0.140606507 | [PDGFRB]                  |
| GO:0006412 | translation                                                          | 130  | 1 | 0.148097554 | 0.166609749 | [MRPL13]                  |
| GO:0008219 | cell death                                                           | 136  | 1 | 0.154386134 | 0.17173289  | [HSPB1]                   |
| GO:0007165 | signal transduction                                                  | 141  | 1 | 0.159591794 | 0.175550973 | [PDGFRB]                  |
| GO:0045944 | positive regulation of transcription from RNA polymerase II promoter | 158  | 1 | 0.177056857 | 0.192622295 | [RNF10]                   |
| GO:0007067 | mitosis                                                              | 159  | 1 | 0.178073045 | 0.191622081 | [ANAPC7]                  |
| GO:0007283 | spermatogenesis                                                      | 174  | 1 | 0.193168894 | 0.205631404 | [DZIP1]                   |
| GO:0006955 | immune response                                                      | 220  | 1 | 0.237786019 | 0.250434212 | [CEBPG]                   |
| GO:0051301 | cell division                                                        | 285  | 1 | 0.296729794 | 0.30922368  | [ANAPC7]                  |
| GO:0044419 | interspecies interaction between organisms                           | 315  | 1 | 0.322402656 | 0.332477739 | [ATP6V1H]                 |
| GO:0006915 | apoptotic process                                                    | 321  | 1 | 0.32742572  | 0.334176766 | [SH3KBP1]                 |
| GO:0045893 | positive regulation of transcription, DNA-dependent                  | 334  | 1 | 0.338183981 | 0.341634838 | [RNF10]                   |
| GO:0006355 | regulation of transcription, DNA-dependent                           | 1254 | 1 | 1           | 1           | [CCNC]                    |

Table S12-9. GO annotation analysis of the module eigengene in 15 postnatal highly LDE-specific modules (LDE\_pink).

| GO ID      | GO Name                                                          | Total Count | Diff Count | P Value     | FDR         | Gene                                         |
|------------|------------------------------------------------------------------|-------------|------------|-------------|-------------|----------------------------------------------|
| GO:0006807 | nitrogen compound metabolic process                              | 1           | 1          | 0.001093668 | 0.05614163  | [GPT]                                        |
| GO:0010837 | regulation of keratinocyte proliferation                         | 1           | 1          | 0.001093668 | 0.05614163  | [PRKD1]                                      |
| GO:0016568 | chromatin modification                                           | 221         | 3          | 0.001843311 | 0.047311653 | [RUVBL2, SETD2, SETDB1]                      |
| GO:0005975 | carbohydrate metabolic process                                   | 58          | 2          | 0.001861844 | 0.035840497 | [GALT, PYGM]                                 |
| GO:0043555 | regulation of translation in response to stress                  | 2           | 1          | 0.002186165 | 0.025897647 | [RPS6KA3]                                    |
| GO:0045650 | negative regulation of macrophage differentiation                | 2           | 1          | 0.002186165 | 0.025897647 | [INHA]                                       |
| GO:0030035 | microspike assembly                                              | 2           | 1          | 0.002186165 | 0.025897647 | [ACTN2]                                      |
| GO:0002088 | lens development in camera-type eye                              | 2           | 1          | 0.002186165 | 0.025897647 | [PITX3]                                      |
| GO:0006355 | regulation of transcription, DNA-dependent                       | 1254        | 6          | 0.002367801 | 0.020257853 | [ESF1, PITX3, RUVBL2, SETD2, SETDB1, ZNF154] |
| GO:0042541 | hemoglobin biosynthetic process                                  | 3           | 1          | 0.003277492 | 0.018693843 | [INHA]                                       |
| GO:0045077 | negative regulation of interferon-gamma biosynthetic process     | 3           | 1          | 0.003277492 | 0.018693843 | [INHA]                                       |
| GO:0046881 | positive regulation of follicle-stimulating hormone secretion    | 3           | 1          | 0.003277492 | 0.018693843 | [INHA]                                       |
| GO:0045578 | negative regulation of B cell differentiation                    | 3           | 1          | 0.003277492 | 0.018693843 | [INHA]                                       |
| GO:0002089 | lens morphogenesis in camera-type eye                            | 3           | 1          | 0.003277492 | 0.018693843 | [PITX3]                                      |
| GO:0071542 | dopaminergic neuron differentiation                              | 3           | 1          | 0.003277492 | 0.018693843 | [PITX3]                                      |
| GO:0048193 | Golgi vesicle transport                                          | 3           | 1          | 0.003277492 | 0.018693843 | [PRKD1]                                      |
| GO:0006012 | galactose metabolic process                                      | 3           | 1          | 0.003277492 | 0.018693843 | [GALT]                                       |
| GO:0043620 | regulation of DNA-dependent transcription in response to stress  | 4           | 1          | 0.00436765  | 0.018178868 | [RPS6KA3]                                    |
| GO:0046882 | negative regulation of follicle-stimulating hormone secretion    | 4           | 1          | 0.00436765  | 0.018178868 | [INHA]                                       |
| GO:0006950 | response to stress                                               | 104         | 2          | 0.005842846 | 0.022494958 | [HSPB7, RPS6KA3]                             |
| GO:0002224 | toll-like receptor signaling pathway                             | 6           | 1          | 0.006544465 | 0.022396613 | [RPS6KA3]                                    |
| GO:0045669 | positive regulation of osteoblast differentiation                | 6           | 1          | 0.006544465 | 0.022396613 | [PRKD1]                                      |
| GO:0009605 | response to external stimulus                                    | 6           | 1          | 0.006544465 | 0.022396613 | [INHA]                                       |
| GO:0030901 | midbrain development                                             | 6           | 1          | 0.006544465 | 0.022396613 | [PITX3]                                      |
| GO:0045597 | positive regulation of cell differentiation                      | 7           | 1          | 0.007631124 | 0.022599868 | [RPS6KA3]                                    |
| GO:0035924 | cellular response to vascular endothelial growth factor stimulus | 7           | 1          | 0.007631124 | 0.022599868 | [PRKD1]                                      |

|            |                                                                                              |     |   |             |                           |
|------------|----------------------------------------------------------------------------------------------|-----|---|-------------|---------------------------|
| GO:0042326 | negative regulation of phosphorylation                                                       | 7   | 1 | 0.007631124 | 0.022599868 [INHA]        |
| GO:0034599 | cellular response to oxidative stress                                                        | 9   | 1 | 0.009800952 | 0.026952618 [PRKD1]       |
| GO:0006094 | gluconeogenesis                                                                              | 10  | 1 | 0.010884123 | 0.028409407 [GPT]         |
| GO:0001541 | ovarian follicle development                                                                 | 10  | 1 | 0.010884123 | 0.028409407 [INHA]        |
| GO:0060548 | negative regulation of cell death                                                            | 11  | 1 | 0.011966134 | 0.029722334 [PRKD1]       |
| GO:0043968 | histone H2A acetylation                                                                      | 12  | 1 | 0.013046986 | 0.030911322 [RUVBL2]      |
| GO:0048041 | focal adhesion assembly                                                                      | 12  | 1 | 0.013046986 | 0.030911322 [ACTN2]       |
| GO:0030218 | erythrocyte differentiation                                                                  | 13  | 1 | 0.014126681 | 0.031992777 [INHA]        |
| GO:0034644 | cellular response to UV                                                                      | 14  | 1 | 0.015205218 | 0.033451481 [RUVBL2]      |
| GO:0007031 | peroxisome organization                                                                      | 15  | 1 | 0.016282601 | 0.034349596 [ACOT8]       |
| GO:0010595 | positive regulation of endothelial cell migration                                            | 15  | 1 | 0.016282601 | 0.034349596 [PRKD1]       |
| GO:0032496 | response to lipopolysaccharide                                                               | 17  | 1 | 0.018433904 | 0.036867808 [RPS6KA3]     |
| GO:0043967 | histone H4 acetylation                                                                       | 17  | 1 | 0.018433904 | 0.036867808 [RUVBL2]      |
| GO:0030574 | collagen catabolic process                                                                   | 18  | 1 | 0.019507828 | 0.036636652 [MMP11]       |
| GO:0007030 | Golgi organization                                                                           | 18  | 1 | 0.019507828 | 0.036636652 [PRKD1]       |
| GO:0010976 | positive regulation of neuron projection development                                         | 18  | 1 | 0.019507828 | 0.036636652 [PRKD1]       |
| GO:0007399 | nervous system development                                                                   | 214 | 2 | 0.023042495 | 0.041262143 [INHA, PRKD1] |
| GO:0045786 | negative regulation of cell cycle                                                            | 24  | 1 | 0.02592725  | 0.045372688 [INHA]        |
| GO:0051289 | protein homotetramerization                                                                  | 25  | 1 | 0.026993145 | 0.045680707 [ACTN2]       |
| GO:0043154 | negative regulation of cysteine-type endopeptidase activity<br>involved in apoptotic process | 25  | 1 | 0.026993145 | 0.045680707 [RPS6KA3]     |
| GO:0042127 | regulation of cell proliferation                                                             | 29  | 1 | 0.031245317 | 0.051189136 [GNL3]        |
| GO:0030307 | positive regulation of cell growth                                                           | 30  | 1 | 0.032305514 | 0.051823428 [RPS6KA3]     |
| GO:0007166 | cell surface receptor signaling pathway                                                      | 32  | 1 | 0.0344225   | 0.0540925 [INHA]          |
| GO:0045766 | positive regulation of angiogenesis                                                          | 34  | 1 | 0.036534951 | 0.056263824 [PRKD1]       |
| GO:0006357 | regulation of transcription from RNA polymerase II promoter                                  | 38  | 1 | 0.040746286 | 0.061518903 [ELP4]        |
| GO:0001558 | regulation of cell growth                                                                    | 39  | 1 | 0.041796301 | 0.061890676 [CD320]       |
| GO:0006979 | response to oxidative stress                                                                 | 40  | 1 | 0.042845189 | 0.062246785 [SRXN1]       |
| GO:0007267 | cell-cell signaling                                                                          | 42  | 1 | 0.044939596 | 0.064080535 [INHA]        |
| GO:0051092 | positive regulation of NF-kappaB transcription factor activity                               | 45  | 1 | 0.048072794 | 0.067301911 [PRKD1]       |
| GO:0040008 | regulation of growth                                                                         | 51  | 1 | 0.054309025 | 0.074674909 [RUVBL2]      |
| GO:0007050 | cell cycle arrest                                                                            | 52  | 1 | 0.0553445   | 0.074763623 [INHA]        |
| GO:0015031 | protein transport                                                                            | 383 | 2 | 0.065887811 | 0.087471749 [MTX2, SERP1] |
| GO:0042981 | regulation of apoptotic process                                                              | 65  | 1 | 0.068705075 | 0.089665945 [ACTN2]       |
| GO:0006310 | DNA recombination                                                                            | 73  | 1 | 0.076834813 | 0.098604677 [RUVBL2]      |
| GO:0006917 | induction of apoptosis                                                                       | 79  | 1 | 0.082886474 | 0.104627189 [INHA]        |

|            |                                                          |     |   |             |                             |
|------------|----------------------------------------------------------|-----|---|-------------|-----------------------------|
| GO:0006811 | ion transport                                            | 455 | 2 | 0.088598888 | 0.110034103 [KCNAB1, TRPC3] |
| GO:0016042 | lipid catabolic process                                  | 87  | 1 | 0.090894965 | 0.111093846 [PLA2G7]        |
| GO:0030154 | cell differentiation                                     | 484 | 2 | 0.098323368 | 0.118295303 [INHA, PRKD1]   |
| GO:0006813 | potassium ion transport                                  | 102 | 1 | 0.10572674  | 0.125245523 [KCNAB1]        |
| GO:0045087 | innate immune response                                   | 103 | 1 | 0.106707057 | 0.124491566 [PRKD1]         |
| GO:0043123 | positive regulation of I-kappaB kinase/NF-kappaB cascade | 105 | 1 | 0.108664534 | 0.124883121 [PRKD1]         |
| GO:0043066 | negative regulation of apoptotic process                 | 118 | 1 | 0.121286148 | 0.137338726 [RPS6KA3]       |
| GO:0006954 | inflammatory response                                    | 128 | 1 | 0.130875836 | 0.146049846 [PRKD1]         |
| GO:0006281 | DNA repair                                               | 147 | 1 | 0.148814748 | 0.163696223 [RUVBL2]        |
| GO:0044419 | interspecies interaction between organisms               | 315 | 1 | 0.292440552 | 0.317153838 [ACOT8]         |
| GO:0006915 | apoptotic process                                        | 321 | 1 | 0.297104534 | 0.317736794 [PRKD1]         |
| GO:0045893 | positive regulation of transcription, DNA-dependent      | 334 | 1 | 0.3071068   | 0.32393457 [PITX3]          |
| GO:0007049 | cell cycle                                               | 405 | 1 | 0.359324034 | 0.373891224 [RPS6KA3]       |
| GO:0007155 | cell adhesion                                            | 420 | 1 | 0.369852331 | 0.379715059 [ACTN2]         |
| GO:0006508 | proteolysis                                              | 476 | 1 | 0.407682    | 0.413046237 [MMP11]         |
| GO:0007275 | multicellular organismal development                     | 822 | 1 | 0.596674513 | 0.596674513 [PITX3]         |

---

Table S12-10. GO annotation analysis of the module eigengene in 15 postnatal highly LDE-specific modules (LDE\_purple).

| GO ID      | GO Name                                                                      | Total Count | Diff Count | P Value | FDR     | Gene                   |
|------------|------------------------------------------------------------------------------|-------------|------------|---------|---------|------------------------|
| GO:0006412 | translation                                                                  | 130         | 3          | 0.00012 | 0.00769 | [MRPS6, RPL27A, RPL36] |
| GO:0060400 | negative regulation of growth hormone receptor signaling pathway             | 1           | 1          | 0.00073 | 0.0158  | [LEPROT]               |
| GO:0046717 | acid secretion                                                               | 1           | 1          | 0.00073 | 0.0158  | [SLC22A16]             |
| GO:0015879 | carnitine transport                                                          | 1           | 1          | 0.00073 | 0.0158  | [SLC22A16]             |
| GO:0006457 | protein folding                                                              | 68          | 2          | 0.00114 | 0.0148  | [DNAJB6, LMAN2L]       |
| GO:2000009 | negative regulation of protein localization at cell surface                  | 2           | 1          | 0.00146 | 0.01115 | [LEPROT]               |
| GO:0060998 | regulation of dendritic spine development                                    | 2           | 1          | 0.00146 | 0.01115 | [ARF6]                 |
| GO:0035020 | regulation of Rac protein signal transduction                                | 2           | 1          | 0.00146 | 0.01115 | [ARF6]                 |
| GO:0046426 | negative regulation of JAK-STAT cascade                                      | 2           | 1          | 0.00146 | 0.01115 | [LEPROT]               |
| GO:0048261 | negative regulation of receptor-mediated endocytosis                         | 2           | 1          | 0.00146 | 0.01115 | [ARF6]                 |
| GO:0043516 | regulation of DNA damage response, signal transduction by p53 class mediator | 2           | 1          | 0.00146 | 0.01115 | [SMYD2]                |
| GO:0006354 | transcription elongation, DNA-dependent                                      | 3           | 1          | 0.00219 | 0.01137 | [ELL3]                 |
| GO:0046903 | secretion                                                                    | 3           | 1          | 0.00219 | 0.01137 | [TPD52]                |
| GO:0006368 | transcription elongation from RNA polymerase II promoter                     | 4           | 1          | 0.00291 | 0.01306 | [ELL3]                 |
| GO:0032786 | positive regulation of transcription elongation, DNA-dependent               | 4           | 1          | 0.00291 | 0.01306 | [ELL3]                 |
| GO:0045109 | intermediate filament organization                                           | 5           | 1          | 0.00364 | 0.01392 | [DNAJB6]               |
| GO:0015695 | organic cation transport                                                     | 5           | 1          | 0.00364 | 0.01392 | [SLC22A16]             |
| GO:0018027 | peptidyl-lysine dimethylation                                                | 5           | 1          | 0.00364 | 0.01392 | [SMYD2]                |
| GO:0051489 | regulation of filopodium assembly                                            | 6           | 1          | 0.00437 | 0.01419 | [ARF6]                 |
| GO:0032465 | regulation of cytokinesis                                                    | 6           | 1          | 0.00437 | 0.01419 | [CETN2]                |
| GO:0018026 | peptidyl-lysine monomethylation                                              | 6           | 1          | 0.00437 | 0.01419 | [SMYD2]                |
| GO:0031529 | ruffle organization                                                          | 7           | 1          | 0.00509 | 0.01409 | [ARF6]                 |
| GO:0000278 | mitotic cell cycle                                                           | 7           | 1          | 0.00509 | 0.01409 | [CDC25B]               |
| GO:0007099 | centriole replication                                                        | 7           | 1          | 0.00509 | 0.01409 | [CETN2]                |
| GO:0030866 | cortical actin cytoskeleton organization                                     | 7           | 1          | 0.00509 | 0.01409 | [ARF6]                 |
| GO:0007067 | mitosis                                                                      | 159         | 2          | 0.00602 | 0.01506 | [CDC25B, CETN2]        |
| GO:0007283 | spermatogenesis                                                              | 174         | 2          | 0.00717 | 0.01726 | [ELL3, SLC22A16]       |
| GO:0030838 | positive regulation of actin filament polymerization                         | 11          | 1          | 0.00799 | 0.01791 | [ARF6]                 |
| GO:0030177 | positive regulation of Wnt receptor signaling pathway                        | 11          | 1          | 0.00799 | 0.01791 | [ZRANB1]               |
| GO:0030317 | sperm motility                                                               | 11          | 1          | 0.00799 | 0.01791 | [SLC22A16]             |
| GO:0071777 | positive regulation of cell cycle cytokinesis                                | 12          | 1          | 0.00872 | 0.01827 | [CDC25B]               |
| GO:0070536 | protein K63-linked deubiquitination                                          | 13          | 1          | 0.00944 | 0.01917 | [ZRANB1]               |

|            |                                                             |      |   |         |         |                       |
|------------|-------------------------------------------------------------|------|---|---------|---------|-----------------------|
| GO:0045931 | positive regulation of mitotic cell cycle                   | 16   | 1 | 0.0116  | 0.02252 | [CDC25B]              |
| GO:0006289 | nucleotide-excision repair                                  | 16   | 1 | 0.0116  | 0.02252 | [CETN2]               |
| GO:0022604 | regulation of cell morphogenesis                            | 17   | 1 | 0.01233 | 0.02289 | [ZRANB1]              |
| GO:0007338 | single fertilization                                        | 18   | 1 | 0.01305 | 0.02323 | [SLC22A16]            |
| GO:0030183 | B cell differentiation                                      | 18   | 1 | 0.01305 | 0.02323 | [TPD52]               |
| GO:0006888 | ER to Golgi vesicle-mediated transport                      | 19   | 1 | 0.01377 | 0.02324 | [LMAN2L]              |
| GO:0045727 | positive regulation of translation                          | 19   | 1 | 0.01377 | 0.02324 | [ABCF1]               |
| GO:0042254 | ribosome biogenesis                                         | 22   | 1 | 0.01592 | 0.02555 | [ABCF1]               |
| GO:0000086 | G2/M transition of mitotic cell cycle                       | 22   | 1 | 0.01592 | 0.02555 | [CDC25B]              |
| GO:0043154 | negative regulation of cysteine-type endopeptidase activity | 25   | 1 | 0.01807 | 0.02797 | [DNAJB6]              |
| GO:0051301 | cell division                                               | 285  | 2 | 0.01833 | 0.02771 | [CDC25B, CETN2]       |
| GO:0006413 | translational initiation                                    | 26   | 1 | 0.01879 | 0.02776 | [ABCF1]               |
| GO:0015992 | proton transport                                            | 28   | 1 | 0.02022 | 0.02921 | [ATP6V1E1]            |
| GO:0006928 | cellular component movement                                 | 31   | 1 | 0.02236 | 0.0316  | [ARF6]                |
| GO:0006986 | response to unfolded protein                                | 35   | 1 | 0.02521 | 0.03487 | [DNAJB6]              |
| GO:0006470 | protein dephosphorylation                                   | 37   | 1 | 0.02664 | 0.03607 | [PPP2CB]              |
| GO:0006633 | fatty acid biosynthetic process                             | 42   | 1 | 0.03018 | 0.04004 | [SCD]                 |
| GO:0015031 | protein transport                                           | 383  | 2 | 0.03171 | 0.04122 | [ARF6, LMAN2L]        |
| GO:0006811 | ion transport                                               | 455  | 2 | 0.04335 | 0.05525 | [ATP6V1E1, SLC22A16]  |
| GO:0016477 | cell migration                                              | 67   | 1 | 0.04773 | 0.05966 | [ZRANB1]              |
| GO:0030154 | cell differentiation                                        | 484  | 2 | 0.04843 | 0.05939 | [ARF6, SLC22A16]      |
| GO:0007010 | cytoskeleton organization                                   | 71   | 1 | 0.05051 | 0.0608  | [ZRANB1]              |
| GO:0006355 | regulation of transcription, DNA-dependent                  | 1254 | 3 | 0.0625  | 0.07387 | [ELL3, SMYD2, ZNF134] |
| GO:0008285 | negative regulation of cell proliferation                   | 102  | 1 | 0.07178 | 0.08331 | [SMYD2]               |
| GO:0016192 | vesicle-mediated transport                                  | 104  | 1 | 0.07313 | 0.0834  | [ARF6]                |
| GO:0000122 | negative regulation of transcription                        | 117  | 1 | 0.0819  | 0.09179 | [SMYD2]               |
| GO:0045944 | positive regulation of transcription                        | 158  | 1 | 0.10903 | 0.12012 | [ELL3]                |
| GO:0006468 | protein phosphorylation                                     | 185  | 1 | 0.12648 | 0.13701 | [CDC25B]              |
| GO:0007399 | nervous system development                                  | 214  | 1 | 0.14484 | 0.15434 | [ARF6]                |
| GO:0016568 | chromatin modification                                      | 221  | 1 | 0.14922 | 0.15644 | [SMYD2]               |
| GO:0007155 | cell adhesion                                               | 420  | 1 | 0.26495 | 0.27336 | [ARF6]                |
| GO:0006508 | proteolysis                                                 | 476  | 1 | 0.29466 | 0.29927 | [ZRANB1]              |
| GO:0007275 | multicellular organismal development                        | 822  | 1 | 0.45405 | 0.45405 | [SLC22A16]            |

Table S12-11. GO annotation analysis of the module eigengene in 15 postnatal highly LDE-specific modules (LDE\_red).

| GO ID      | GO Name                                                  | Total Count | Diff Count | P Value     | FDR         | Gene                               |
|------------|----------------------------------------------------------|-------------|------------|-------------|-------------|------------------------------------|
| GO:0071456 | cellular response to hypoxia                             | 21          | 2          | 0.000176797 | 0.014497332 | [LMNA, TP53]                       |
| GO:0006461 | protein complex assembly                                 | 33          | 2          | 0.000441372 | 0.018096253 | [MKI67IP, TP53]                    |
| GO:0015886 | heme transport                                           | 1           | 1          | 0.000934175 | 0.015320468 | [ABCB6]                            |
| GO:0007220 | Notch receptor processing                                | 1           | 1          | 0.000934175 | 0.015320468 | [APH1A]                            |
| GO:0016072 | rRNA metabolic process                                   | 1           | 1          | 0.000934175 | 0.015320468 | [MKI67IP]                          |
| GO:0031293 | membrane protein intracellular domain proteolysis        | 1           | 1          | 0.000934175 | 0.015320468 | [APH1A]                            |
| GO:0090343 | positive regulation of cell aging                        | 1           | 1          | 0.000934175 | 0.015320468 | [LMNA]                             |
| GO:0032727 | positive regulation of interferon-alpha production       | 2           | 1          | 0.001867498 | 0.017014984 | [DDX58]                            |
| GO:0042987 | amyloid precursor protein catabolic process              | 2           | 1          | 0.001867498 | 0.017014984 | [APH1A]                            |
| GO:0051097 | negative regulation of helicase activity                 | 2           | 1          | 0.001867498 | 0.017014984 | [TP53]                             |
| GO:0006364 | rRNA processing                                          | 80          | 2          | 0.002569208 | 0.019152279 | [EXOSC1, UTP11L]                   |
| GO:0042832 | defense response to protozoan                            | 3           | 1          | 0.002799971 | 0.015834319 | [CLEC7A]                           |
| GO:0006779 | porphyrin-containing compound biosynthetic process       | 3           | 1          | 0.002799971 | 0.015834319 | [ABCB6]                            |
| GO:0030149 | sphingolipid catabolic process                           | 3           | 1          | 0.002799971 | 0.015834319 | [SGPL1]                            |
| GO:0006910 | phagocytosis, recognition                                | 3           | 1          | 0.002799971 | 0.015834319 | [CLEC7A]                           |
| GO:0009756 | carbohydrate mediated signaling                          | 3           | 1          | 0.002799971 | 0.015834319 | [CLEC7A]                           |
| GO:0043985 | histone H4-R3 methylation                                | 3           | 1          | 0.002799971 | 0.015834319 | [PRMT5]                            |
| GO:0009303 | rRNA transcription                                       | 4           | 1          | 0.003731594 | 0.014926376 | [MKI67IP]                          |
| GO:0018216 | peptidyl-arginine methylation                            | 4           | 1          | 0.003731594 | 0.014926376 | [PRMT5]                            |
| GO:0006400 | tRNA modification                                        | 4           | 1          | 0.003731594 | 0.014926376 | [METTL1]                           |
| GO:0002230 | positive regulation of defense response to virus by host | 4           | 1          | 0.003731594 | 0.014926376 | [DDX58]                            |
| GO:0033522 | histone H2A ubiquitination                               | 4           | 1          | 0.003731594 | 0.014926376 | [RNF8]                             |
| GO:0046902 | regulation of mitochondrial membrane permeability        | 4           | 1          | 0.003731594 | 0.014926376 | [TP53]                             |
| GO:0045087 | innate immune response                                   | 103         | 2          | 0.00421338  | 0.014395713 | [CLEC7A, DDX58]                    |
| GO:0016075 | rRNA catabolic process                                   | 5           | 1          | 0.004662368 | 0.015292566 | [DIS3L]                            |
| GO:0032461 | positive regulation of protein oligomerization           | 6           | 1          | 0.005592293 | 0.017637232 | [TP53]                             |
| GO:0006355 | regulation of transcription, DNA-dependent               | 1254        | 5          | 0.00603276  | 0.018321715 | [AFF3, MAGED1, MED31, PRMT5, TP53] |
| GO:0000387 | spliceosomal snRNP assembly                              | 7           | 1          | 0.006521371 | 0.018763242 | [PRMT5]                            |
| GO:0008037 | cell recognition                                         | 7           | 1          | 0.006521371 | 0.018763242 | [CLEC7A]                           |
| GO:0007569 | cell aging                                               | 8           | 1          | 0.007449601 | 0.019705397 | [TP53]                             |



|            |                                                                                                    |     |   |             |                           |
|------------|----------------------------------------------------------------------------------------------------|-----|---|-------------|---------------------------|
| GO:0033523 | histone H2B ubiquitination                                                                         | 8   | 1 | 0.007449601 | 0.019705397 [RNF8]        |
| GO:0048147 | negative regulation of fibroblast proliferation                                                    | 8   | 1 | 0.007449601 | 0.019705397 [TP53]        |
| GO:0032728 | positive regulation of interferon-beta production                                                  | 9   | 1 | 0.008376986 | 0.019910518 [DDX58]       |
| GO:0006672 | ceramide metabolic process                                                                         | 9   | 1 | 0.008376986 | 0.019910518 [SGPL1]       |
| GO:0090200 | positive regulation of release of cytochrome c from mitochondria                                   | 9   | 1 | 0.008376986 | 0.019910518 [TP53]        |
| GO:0042149 | cellular response to glucose starvation                                                            | 9   | 1 | 0.008376986 | 0.019910518 [TP53]        |
| GO:0071158 | positive regulation of cell cycle arrest                                                           | 10  | 1 | 0.009303525 | 0.020618624 [TP53]        |
| GO:0034504 | protein localization to nucleus                                                                    | 11  | 1 | 0.01022922  | 0.02178691 [LMNA]         |
| GO:0046677 | response to antibiotic                                                                             | 11  | 1 | 0.01022922  | 0.02178691 [TP53]         |
| GO:0071108 | protein K48-linked deubiquitination                                                                | 12  | 1 | 0.011154071 | 0.022308142 [USP5]        |
| GO:0006284 | base-excision repair                                                                               | 12  | 1 | 0.011154071 | 0.022308142 [TP53]        |
| GO:0032436 | positive regulation of proteasomal ubiquitin-dependent protein catabolic process                   | 12  | 1 | 0.011154071 | 0.022308142 [USP5]        |
| GO:0042771 | DNA damage response, signal transduction by p53 class mediator resulting in induction of apoptosis | 13  | 1 | 0.012078078 | 0.022767872 [TP53]        |
| GO:0034613 | cellular protein localization                                                                      | 13  | 1 | 0.012078078 | 0.022767872 [TP53]        |
| GO:0050680 | negative regulation of epithelial cell proliferation                                               | 15  | 1 | 0.013923567 | 0.024820272 [MAGED1]      |
| GO:0006879 | cellular iron ion homeostasis                                                                      | 15  | 1 | 0.013923567 | 0.024820272 [ABCB6]       |
| GO:2001244 | positive regulation of intrinsic apoptotic signaling pathway                                       | 15  | 1 | 0.013923567 | 0.024820272 [TP53]        |
| GO:0006289 | nucleotide-excision repair                                                                         | 16  | 1 | 0.01484505  | 0.025098848 [TP53]        |
| GO:0051262 | protein tetramerization                                                                            | 16  | 1 | 0.01484505  | 0.025098848 [TP53]        |
| GO:0035690 | cellular response to drug                                                                          | 17  | 1 | 0.015765693 | 0.025855736 [TP53]        |
| GO:0045739 | positive regulation of DNA repair                                                                  | 18  | 1 | 0.016685496 | 0.02682766 [RNF8]         |
| GO:0016568 | chromatin modification                                                                             | 221 | 2 | 0.018193697 | 0.02869006 [PRMT5, RNF8]  |
| GO:0008104 | protein localization                                                                               | 21  | 1 | 0.019439877 | 0.03007679 [TP53]         |
| GO:0010212 | response to ionizing radiation                                                                     | 27  | 1 | 0.024926075 | 0.037850707 [RNF8]        |
| GO:0042110 | T cell activation                                                                                  | 32  | 1 | 0.029475022 | 0.043944578 [CLEC7A]      |
| GO:0006302 | double-strand break repair                                                                         | 33  | 1 | 0.030382323 | 0.044488402 [RNF8]        |
| GO:0007517 | muscle organ development                                                                           | 38  | 1 | 0.034906433 | 0.050216272 [LMNA]        |
| GO:0006915 | apoptotic process                                                                                  | 321 | 2 | 0.036260333 | 0.051264609 [SGPL1, TP53] |
| GO:0010923 | negative regulation of phosphatase activity                                                        | 50  | 1 | 0.045680436 | 0.063488064 [MKI67IP]     |
| GO:0007050 | cell cycle arrest                                                                                  | 52  | 1 | 0.047464658 | 0.064868366 [TP53]        |
| GO:0030308 | negative regulation of cell growth                                                                 | 58  | 1 | 0.052797819 | 0.070974118 [TP53]        |
| GO:0007049 | cell cycle                                                                                         | 405 | 2 | 0.055012177 | 0.072758041 [RNF8, TP53]  |
| GO:0042981 | regulation of apoptotic process                                                                    | 65  | 1 | 0.058983027 | 0.076771559 [MAGED1]      |

|            |                                                                      |     |   |             |                              |
|------------|----------------------------------------------------------------------|-----|---|-------------|------------------------------|
| GO:0006629 | lipid metabolic process                                              | 69  | 1 | 0.062499722 | 0.080077768 [SGPL1]          |
| GO:0006508 | proteolysis                                                          | 476 | 2 | 0.072967798 | 0.092051684 [ADAMTS20, USP5] |
| GO:0043065 | positive regulation of apoptotic process                             | 83  | 1 | 0.07470747  | 0.092818372 [TP53]           |
| GO:0008283 | cell proliferation                                                   | 90  | 1 | 0.080753047 | 0.098832088 [TP53]           |
| GO:0006974 | response to DNA damage stimulus                                      | 93  | 1 | 0.083332196 | 0.100488825 [TP53]           |
| GO:0006950 | response to stress                                                   | 104 | 1 | 0.092728814 | 0.11019946 [HSPB6]           |
| GO:0000122 | negative regulation of transcription from RNA polymerase II promoter | 117 | 1 | 0.103712792 | 0.121492127 [TP53]           |
| GO:0043066 | negative regulation of apoptotic process                             | 118 | 1 | 0.104552319 | 0.120750565 [TP53]           |
| GO:0006954 | inflammatory response                                                | 128 | 1 | 0.112905505 | 0.128586825 [CLEC7A]         |
| GO:0008219 | cell death                                                           | 136 | 1 | 0.119533274 | 0.134270253 [MFSD8]          |
| GO:0045944 | positive regulation of transcription from RNA polymerase II promoter | 158 | 1 | 0.137511522 | 0.152377633 [TP53]           |
| GO:0007067 | mitosis                                                              | 159 | 1 | 0.138320148 | 0.151230029 [RNF8]           |
| GO:0051301 | cell division                                                        | 285 | 1 | 0.234503182 | 0.253016591 [RNF8]           |
| GO:0044419 | interspecies interaction between organisms                           | 315 | 1 | 0.25581179  | 0.272422945 [TP53]           |
| GO:0045893 | positive regulation of transcription, DNA-dependent                  | 334 | 1 | 0.269006749 | 0.282801967 [TP53]           |
| GO:0015031 | protein transport                                                    | 383 | 1 | 0.301991377 | 0.313459404 [MTX1]           |
| GO:0030154 | cell differentiation                                                 | 484 | 1 | 0.365463607 | 0.374600197 [TP53]           |
| GO:0008150 | biological_process                                                   | 588 | 1 | 0.424928816 | 0.430174851 [ABHD11]         |
| GO:0007275 | multicellular organismal development                                 | 822 | 1 | 0.539540588 | 0.539540588 [TP53]           |

---

Table S12-12. GO annotation analysis of the module eigengene in 15 postnatal highly LDE-specific modules (LDE\_royalblue).

| GO ID      | GO Name                                                  | Total Count | Diff Count | P Value   | FDR       | Gene                         |
|------------|----------------------------------------------------------|-------------|------------|-----------|-----------|------------------------------|
| GO:0045870 | positive regulation of retroviral genome replication     | 1           | 1          | 0.0009342 | 0.0330075 | [TOP2A]                      |
| GO:0009399 | nitrogen fixation                                        | 1           | 1          | 0.0009342 | 0.0330075 | [ISCU]                       |
| GO:0006839 | mitochondrial transport                                  | 2           | 1          | 0.0018675 | 0.0247444 | [HSP90AA1]                   |
| GO:0016557 | peroxisome membrane biogenesis                           | 2           | 1          | 0.0018675 | 0.0247444 | [PEX19]                      |
| GO:0006266 | DNA ligation                                             | 2           | 1          | 0.0018675 | 0.0247444 | [TOP2A]                      |
| GO:0042026 | protein refolding                                        | 3           | 1          | 0.0028    | 0.0228305 | [HSP90AA1]                   |
| GO:0030263 | apoptotic chromosome condensation                        | 3           | 1          | 0.0028    | 0.0228305 | [TOP2A]                      |
| GO:0006974 | response to DNA damage stimulus                          | 93          | 2          | 0.0034516 | 0.022867  | [IKBKKG, TOP2A]              |
| GO:0006950 | response to stress                                       | 104         | 2          | 0.0042935 | 0.0252837 | [HSP90AA1, HSPH1]            |
| GO:0045070 | positive regulation of viral genome replication          | 5           | 1          | 0.0046624 | 0.0247105 | [TOP2A]                      |
| GO:0015031 | protein transport                                        | 383         | 3          | 0.0054984 | 0.0264921 | [CHMP1B, CHMP5, DNAJC14]     |
| GO:0007049 | cell cycle                                               | 405         | 3          | 0.0064128 | 0.0283231 | [CCPG1, CHMP1B, MAPK6]       |
| GO:0000387 | spliceosomal snRNP assembly                              | 7           | 1          | 0.0065214 | 0.0238367 | [SNRPC]                      |
| GO:0016226 | iron-sulfur cluster assembly                             | 7           | 1          | 0.0065214 | 0.0238367 | [ISCU]                       |
| GO:0006625 | protein targeting to peroxisome                          | 7           | 1          | 0.0065214 | 0.0238367 | [PEX19]                      |
| GO:0045429 | positive regulation of nitric oxide biosynthetic process | 7           | 1          | 0.0065214 | 0.0238367 | [HSP90AA1]                   |
| GO:0006412 | translation                                              | 130         | 2          | 0.0066195 | 0.0206372 | [MRPL45, MRPS36]             |
| GO:0010388 | cullin deneddylation                                     | 9           | 1          | 0.008377  | 0.0246656 | [COPS4]                      |
| GO:0010468 | regulation of gene expression                            | 11          | 1          | 0.0102292 | 0.0285341 | [HIF1A]                      |
| GO:0006730 | one-carbon metabolic process                             | 13          | 1          | 0.0120781 | 0.0320069 | [AHCYL2]                     |
| GO:0007249 | I-kappaB kinase/NF-kappaB cascade                        | 14          | 1          | 0.0130012 | 0.0328127 | [IKBKKG]                     |
| GO:0007031 | peroxisome organization                                  | 15          | 1          | 0.0139236 | 0.0335431 | [PEX19]                      |
| GO:0051693 | actin filament capping                                   | 17          | 1          | 0.0157657 | 0.0363296 | [RDX]                        |
| GO:0008150 | biological_process                                       | 588         | 3          | 0.017494  | 0.0386326 | [C6orf62, FILIP1L, SLC25A46] |
| GO:0050852 | T cell receptor signaling pathway                        | 21          | 1          | 0.0194399 | 0.0404044 | [IKBKKG]                     |
| GO:0071456 | cellular response to hypoxia                             | 21          | 1          | 0.0194399 | 0.0404044 | [HIF1A]                      |
| GO:0006464 | protein modification process                             | 24          | 1          | 0.0221867 | 0.0435517 | [RABGGTB]                    |
| GO:0048015 | phosphatidylinositol-mediated signaling                  | 25          | 1          | 0.0231007 | 0.0437263 | [TOP2A]                      |
| GO:0016579 | protein deubiquitination                                 | 29          | 1          | 0.0267481 | 0.0488845 | [UCHL1]                      |
| GO:0001666 | response to hypoxia                                      | 32          | 1          | 0.029475  | 0.0520725 | [HIF1A]                      |

|                                                                           |      |   |           |           |                        |
|---------------------------------------------------------------------------|------|---|-----------|-----------|------------------------|
| GO:0006986 response to unfolded protein                                   | 35   | 1 | 0.0321944 | 0.0550421 | [HSP90AA1]             |
| GO:0022900 electron transport chain                                       | 41   | 1 | 0.037611  | 0.0622932 | [CYB5A]                |
| GO:0008654 phospholipid biosynthetic process                              | 44   | 1 | 0.0403082 | 0.0647374 | [PTDSS1]               |
| GO:0051092 positive regulation of NF-kappaB transcription factor activity | 45   | 1 | 0.0412056 | 0.0642323 | [IKBKKG]               |
| GO:0006631 fatty acid metabolic process                                   | 50   | 1 | 0.0456804 | 0.0691732 | [HADH]                 |
| GO:0007059 chromosome segregation                                         | 55   | 1 | 0.0501349 | 0.0738097 | [TOP2A]                |
| GO:0006810 transport                                                      | 395  | 2 | 0.0526294 | 0.075388  | [CYB5A, SLC25A46]      |
| GO:0043065 positive regulation of apoptotic process                       | 83   | 1 | 0.0747075 | 0.1041973 | [TOP2A]                |
| GO:0006260 DNA replication                                                | 93   | 1 | 0.0833322 | 0.1132463 | [TOP2A]                |
| GO:0000398 nuclear mRNA splicing, via spliceosome                         | 98   | 1 | 0.0876151 | 0.11609   | [SNRPC]                |
| GO:0016567 protein ubiquitination                                         | 99   | 1 | 0.0884693 | 0.1143628 | [TRIP12]               |
| GO:0045087 innate immune response                                         | 103  | 1 | 0.0918785 | 0.1159419 | [IKBKKG]               |
| GO:0009615 response to virus                                              | 114  | 1 | 0.1011896 | 0.1247221 | [IKBKKG]               |
| GO:0006355 regulation of transcription, DNA-dependent                     | 1254 | 3 | 0.1117064 | 0.1345554 | [HIF1A, IKBKG, TCEAL8] |
| GO:0006954 inflammatory response                                          | 128  | 1 | 0.1129055 | 0.1329776 | [IKBKKG]               |
| GO:0008219 cell death                                                     | 136  | 1 | 0.1195333 | 0.1377231 | [UCHL1]                |
| GO:0007165 signal transduction                                            | 141  | 1 | 0.1236511 | 0.1394363 | [HSP90AA1]             |
| GO:0006281 DNA repair                                                     | 147  | 1 | 0.1285676 | 0.1419601 | [TOP2A]                |
| GO:0006468 protein phosphorylation                                        | 185  | 1 | 0.1590867 | 0.1720734 | [MAPK6]                |
| GO:0051301 cell division                                                  | 285  | 1 | 0.2345032 | 0.2485734 | [CHMP1B]               |
| GO:0044419 interspecies interaction between organisms                     | 315  | 1 | 0.2558118 | 0.2658436 | [IKBKKG]               |
| GO:0045893 positive regulation of transcription, DNA-dependent            | 334  | 1 | 0.2690067 | 0.27418   | [HIF1A]                |
| GO:0006508 proteolysis                                                    | 476  | 1 | 0.3606486 | 0.3606486 | [UCHL1]                |

---

Table S12-13. GO annotation analysis of the module eigengene in 15 postnatal highly LDE-specific modules (LDE\_salmon).

| GO ID      | GO Name                                                                          | Total Count | Diff Count | P Value   | FDR       | Gene       |
|------------|----------------------------------------------------------------------------------|-------------|------------|-----------|-----------|------------|
| GO:0048203 | vesicle targeting, trans-Golgi to endosome                                       | 1           | 1          | 0.000957  | 0.0650733 | [WIPI1]    |
| GO:0044030 | regulation of DNA methylation                                                    | 2           | 1          | 0.001913  | 0.0289079 | [MPHOSPH8] |
| GO:0032464 | positive regulation of protein homooligomerization                               | 2           | 1          | 0.001913  | 0.0289079 | [GNB2L1]   |
| GO:0051302 | regulation of cell division                                                      | 2           | 1          | 0.001913  | 0.0289079 | [GNB2L1]   |
| GO:0050765 | negative regulation of phagocytosis                                              | 2           | 1          | 0.001913  | 0.0289079 | [GNB2L1]   |
| GO:0019509 | L-methionine salvage from methylthioadenosine                                    | 2           | 1          | 0.001913  | 0.0289079 | [ADI1]     |
| GO:0031111 | negative regulation of microtubule polymerization or depolymerization            | 2           | 1          | 0.001913  | 0.0289079 | [CLASP1]   |
| GO:0055070 | copper ion homeostasis                                                           | 3           | 1          | 0.0028682 | 0.0216708 | [CUTC]     |
| GO:0010815 | bradykinin catabolic process                                                     | 3           | 1          | 0.0028682 | 0.0216708 | [IDE]      |
| GO:0050435 | beta-amyloid metabolic process                                                   | 3           | 1          | 0.0028682 | 0.0216708 | [IDE]      |
| GO:0009303 | rRNA transcription                                                               | 4           | 1          | 0.0038225 | 0.0199945 | [RNASEK]   |
| GO:0006942 | regulation of striated muscle contraction                                        | 4           | 1          | 0.0038225 | 0.0199945 | [TNNI1]    |
| GO:0031023 | microtubule organizing center organization                                       | 4           | 1          | 0.0038225 | 0.0199945 | [CLASP1]   |
| GO:0010458 | exit from mitosis                                                                | 4           | 1          | 0.0038225 | 0.0199945 | [CLASP1]   |
| GO:0007023 | post-chaperonin tubulin folding pathway                                          | 4           | 1          | 0.0038225 | 0.0199945 | [TBCC]     |
| GO:0034453 | microtubule anchoring                                                            | 5           | 1          | 0.0047759 | 0.0196824 | [CLASP1]   |
| GO:0043547 | positive regulation of GTPase activity                                           | 5           | 1          | 0.0047759 | 0.0196824 | [GNB2L1]   |
| GO:0006777 | Mo-molybdopterin cofactor biosynthetic process                                   | 6           | 1          | 0.0057284 | 0.0210556 | [GPHN]     |
| GO:2000543 | positive regulation of gastrulation                                              | 6           | 1          | 0.0057284 | 0.0210556 | [GNB2L1]   |
| GO:0009086 | methionine biosynthetic process                                                  | 7           | 1          | 0.00668   | 0.0211274 | [ADI1]     |
| GO:0032880 | regulation of protein localization                                               | 7           | 1          | 0.00668   | 0.0211274 | [GNB2L1]   |
| GO:2000114 | regulation of establishment of cell polarity                                     | 7           | 1          | 0.00668   | 0.0211274 | [GNB2L1]   |
| GO:0006825 | copper ion transport                                                             | 7           | 1          | 0.00668   | 0.0211274 | [CUTC]     |
| GO:0016571 | histone methylation                                                              | 8           | 1          | 0.0076307 | 0.0211791 | [NSD1]     |
| GO:0007163 | establishment or maintenance of cell polarity                                    | 8           | 1          | 0.0076307 | 0.0211791 | [CLASP1]   |
| GO:0006635 | fatty acid beta-oxidation                                                        | 9           | 1          | 0.0085805 | 0.0220179 | [ACADM]    |
| GO:0010388 | cullin deneddylation                                                             | 9           | 1          | 0.0085805 | 0.0220179 | [COPS8]    |
| GO:0016311 | dephosphorylation                                                                | 10          | 1          | 0.0095295 | 0.022345  | [PPP3CA]   |
| GO:0007020 | microtubule nucleation                                                           | 10          | 1          | 0.0095295 | 0.022345  | [CLASP1]   |
| GO:0007026 | negative regulation of microtubule depolymerization                              | 10          | 1          | 0.0095295 | 0.022345  | [CLASP1]   |
| GO:0001578 | microtubule bundle formation                                                     | 12          | 1          | 0.0114247 | 0.0242775 | [CLASP1]   |
| GO:0032436 | positive regulation of proteasomal ubiquitin-dependent protein catabolic process | 12          | 1          | 0.0114247 | 0.0242775 | [GNB2L1]   |
| GO:0000226 | microtubule cytoskeleton organization                                            | 12          | 1          | 0.0114247 | 0.0242775 | [CLASP1]   |

|                                                                                 |     |   |           |           |                  |
|---------------------------------------------------------------------------------|-----|---|-----------|-----------|------------------|
| GO:0017148 negative regulation of translation                                   | 14  | 1 | 0.0133164 | 0.0266328 | [GNB2L1]         |
| GO:2001244 positive regulation of intrinsic apoptotic signaling pathway         | 15  | 1 | 0.0142609 | 0.0273166 | [GNB2L1]         |
| GO:0048511 rhythmic process                                                     | 15  | 1 | 0.0142609 | 0.0273166 | [GNB2L1]         |
| GO:0051262 protein tetramerization                                              | 16  | 1 | 0.0152045 | 0.0279435 | [CUTC]           |
| GO:0008652 cellular amino acid biosynthetic process                             | 17  | 1 | 0.0161473 | 0.0281542 | [ADI1]           |
| GO:0030178 negative regulation of Wnt receptor signaling pathway                | 17  | 1 | 0.0161473 | 0.0281542 | [GNB2L1]         |
| GO:0035690 cellular response to drug                                            | 17  | 1 | 0.0161473 | 0.0281542 | [PPP3CA]         |
| GO:0001934 positive regulation of protein phosphorylation                       | 21  | 1 | 0.0199095 | 0.0330206 | [GNB2L1]         |
| GO:0051726 regulation of cell cycle                                             | 22  | 1 | 0.0208478 | 0.0337537 | [GNB2L1]         |
| GO:0042110 T cell activation                                                    | 32  | 1 | 0.0301833 | 0.0477317 | [PPP3CA]         |
| GO:0051301 cell division                                                        | 285 | 2 | 0.0305069 | 0.047147  | [CLASP1, MAPRE3] |
| GO:0006914 autophagy                                                            | 36  | 1 | 0.0338931 | 0.0512163 | [WIPI1]          |
| GO:0006470 protein dephosphorylation                                            | 37  | 1 | 0.0348184 | 0.0514707 | [PPP3CA]         |
| GO:0044419 interspecies interaction between organisms                           | 315 | 2 | 0.0366184 | 0.0529798 | [GNB2L1, IDE]    |
| GO:0022900 electron transport chain                                             | 41  | 1 | 0.0385109 | 0.0545571 | [TXNL1]          |
| GO:0006120 mitochondrial electron transport, NADH to ubiquinone                 | 42  | 1 | 0.0394319 | 0.0547218 | [NDUFB7]         |
| GO:0030335 positive regulation of cell migration                                | 46  | 1 | 0.0431071 | 0.0586257 | [GNB2L1]         |
| GO:0040008 regulation of growth                                                 | 51  | 1 | 0.0476819 | 0.0635759 | [GNB2L1]         |
| GO:0030308 negative regulation of cell growth                                   | 58  | 1 | 0.0540507 | 0.0706817 | [GNB2L1]         |
| GO:0006810 transport                                                            | 395 | 2 | 0.0549406 | 0.0704898 | [NDUFB7, TXNL1]  |
| GO:0006457 protein folding                                                      | 68  | 1 | 0.063077  | 0.0794303 | [TBCC]           |
| GO:0043065 positive regulation of apoptotic process                             | 83  | 1 | 0.076459  | 0.0945311 | [GNB2L1]         |
| GO:0006950 response to stress                                                   | 104 | 1 | 0.0948807 | 0.1152123 | [MAPKAP1]        |
| GO:0000122 negative regulation of transcription from RNA polymerase II promoter | 117 | 1 | 0.1061044 | 0.1265806 | [NSD1]           |
| GO:0006412 translation                                                          | 130 | 1 | 0.1171921 | 0.1373977 | [MRPL52]         |
| GO:0045944 positive regulation of transcription from RNA polymerase II promoter | 158 | 1 | 0.1406194 | 0.1620698 | [STAT5B]         |
| GO:0007067 mitosis                                                              | 159 | 1 | 0.1414447 | 0.160304  | [MAPRE3]         |
| GO:0006955 immune response                                                      | 220 | 1 | 0.190355  | 0.212199  | [IGJ]            |
| GO:0016568 chromatin modification                                               | 221 | 1 | 0.1911337 | 0.2096305 | [NSD1]           |
| GO:0045892 negative regulation of transcription, DNA-dependent                  | 284 | 1 | 0.2387455 | 0.2576935 | [MPHOSPH8]       |
| GO:0006915 apoptotic process                                                    | 321 | 1 | 0.2654208 | 0.2820097 | [BCL2L14]        |
| GO:0045893 positive regulation of transcription, DNA-dependent                  | 334 | 1 | 0.2745749 | 0.2872476 | [NSD1]           |
| GO:0007049 cell cycle                                                           | 405 | 1 | 0.3226389 | 0.3324158 | [MPHOSPH8]       |
| GO:0008150 biological_process                                                   | 588 | 1 | 0.4326405 | 0.4390978 | [MAPKAP1]        |
| GO:0007275 multicellular organismal development                                 | 822 | 1 | 0.5481726 | 0.5481726 | [GNB2L1]         |

Table S12-14. GO annotation analysis of the module eigengene in 15 postnatal highly LDE-specific modules (LDE\_skyblue).

| GO ID      | GO Name                                                                          | Total Count | Diff Count | P Value   | FDR       | Gene                     |
|------------|----------------------------------------------------------------------------------|-------------|------------|-----------|-----------|--------------------------|
| GO:0001732 | formation of translation initiation complex                                      | 1           | 1          | 0.000638  | 0.0223291 | [EIF3A]                  |
| GO:0001869 | negative regulation of complement activation, lectin pathway                     | 2           | 1          | 0.0012756 | 0.0178578 | [SERPING1]               |
| GO:0050775 | positive regulation of dendrite morphogenesis                                    | 2           | 1          | 0.0012756 | 0.0178578 | [CAPRIN1]                |
| GO:0032435 | negative regulation of proteasomal ubiquitin-dependent protein catabolic process | 3           | 1          | 0.0019127 | 0.0133892 | [N4BP1]                  |
| GO:0061003 | positive regulation of dendritic spine morphogenesis                             | 3           | 1          | 0.0019127 | 0.0133892 | [CAPRIN1]                |
| GO:0006167 | AMP biosynthetic process                                                         | 3           | 1          | 0.0019127 | 0.0133892 | [ADSL]                   |
| GO:0006941 | striated muscle contraction                                                      | 4           | 1          | 0.0025495 | 0.0127477 | [TTN]                    |
| GO:0006508 | proteolysis                                                                      | 476         | 3          | 0.0033949 | 0.0148528 | [SERPING1, UCHL3, USP24] |
| GO:0043923 | positive regulation by host of viral transcription                               | 7           | 1          | 0.0044576 | 0.0164227 | [JUN]                    |
| GO:0034614 | cellular response to reactive oxygen species                                     | 7           | 1          | 0.0044576 | 0.0164227 | [PRDX5]                  |
| GO:0031397 | negative regulation of protein ubiquitination                                    | 8           | 1          | 0.0050928 | 0.0162044 | [N4BP1]                  |
| GO:0035329 | hippo signaling cascade                                                          | 11          | 1          | 0.0069962 | 0.0195892 | [TEAD1]                  |
| GO:0043922 | negative regulation by host of viral transcription                               | 11          | 1          | 0.0069962 | 0.0195892 | [JUN]                    |
| GO:0006936 | muscle contraction                                                               | 12          | 1          | 0.0076298 | 0.0184168 | [TTN]                    |
| GO:0043392 | negative regulation of DNA binding                                               | 12          | 1          | 0.0076298 | 0.0184168 | [JUN]                    |
| GO:0017148 | negative regulation of translation                                               | 14          | 1          | 0.008896  | 0.0188703 | [CAPRIN1]                |
| GO:0030163 | protein catabolic process                                                        | 14          | 1          | 0.008896  | 0.0188703 | [UCHL3]                  |
| GO:0051262 | protein tetramerization                                                          | 16          | 1          | 0.0101606 | 0.0192228 | [ADSL]                   |
| GO:0006164 | purine nucleotide biosynthetic process                                           | 16          | 1          | 0.0101606 | 0.0192228 | [ADSL]                   |
| GO:0006958 | complement activation, classical pathway                                         | 22          | 1          | 0.0139451 | 0.0244039 | [SERPING1]               |
| GO:0006413 | translational initiation                                                         | 26          | 1          | 0.0164603 | 0.0274339 | [EIF3A]                  |
| GO:0006986 | response to unfolded protein                                                     | 35          | 1          | 0.022097  | 0.0351544 | [UBXN4]                  |
| GO:0006511 | ubiquitin-dependent protein catabolic process                                    | 40          | 1          | 0.0252151 | 0.0375544 | [UCHL3]                  |
| GO:0006979 | response to oxidative stress                                                     | 40          | 1          | 0.0252151 | 0.0375544 | [PRDX5]                  |
| GO:0016567 | protein ubiquitination                                                           | 99          | 1          | 0.0612914 | 0.0858079 | [DCAF10]                 |
| GO:0045087 | innate immune response                                                           | 103         | 1          | 0.0636901 | 0.0857366 | [SERPING1]               |
| GO:0043066 | negative regulation of apoptotic process                                         | 118         | 1          | 0.0726326 | 0.0941533 | [PRDX5]                  |
| GO:0006954 | inflammatory response                                                            | 128         | 1          | 0.0785484 | 0.0981855 | [PRDX5]                  |
| GO:0045944 | positive regulation of transcription from RNA polymerase II promoter             | 158         | 1          | 0.0960785 | 0.1159568 | [JUN]                    |
| GO:0045892 | negative regulation of transcription, DNA-dependent                              | 284         | 1          | 0.1662563 | 0.1939657 | [JUN]                    |
| GO:0006915 | apoptotic process                                                                | 321         | 1          | 0.1858457 | 0.2098258 | [TNFRSF1B]               |
| GO:0045893 | positive regulation of transcription, DNA-dependent                              | 334         | 1          | 0.1926226 | 0.2106809 | [JUN]                    |
| GO:0006811 | ion transport                                                                    | 455         | 1          | 0.2531442 | 0.2684863 | [ATP5G2]                 |
| GO:0030154 | cell differentiation                                                             | 484         | 1          | 0.2669858 | 0.2748384 | [CAPRIN1]                |
| GO:0006355 | regulation of transcription, DNA-dependent                                       | 1254        | 1          | 0.5559967 | 0.5559967 | [ACAD8]                  |

Table S12-15. GO annotation analysis of the module eigengene in 15 postnatal highly LDE-specific modules (LDE\_yellow).

| GO ID      | GO Name                                                                                   | Total Count | Diff Count | P Value | FDR   | Gene                              |
|------------|-------------------------------------------------------------------------------------------|-------------|------------|---------|-------|-----------------------------------|
| GO:0044419 | interspecies interaction between organisms                                                | 315         | 5          | 0.00029 | 0.037 | [GTF2A2, PSMB5, TAP1, TOP1, WWP2] |
| GO:0070534 | protein K63-linked ubiquitination                                                         | 22          | 2          | 0.00074 | 0.048 | [UBE2D4, WWP2]                    |
| GO:0001896 | autolysis                                                                                 | 1           | 1          | 0.00182 | 0.025 | [CAPN3]                           |
| GO:0014850 | response to muscle activity                                                               | 1           | 1          | 0.00182 | 0.025 | [CAPN3]                           |
| GO:0051346 | negative regulation of hydrolase activity                                                 | 1           | 1          | 0.00182 | 0.025 | [ATPIF1]                          |
| GO:0014718 | positive regulation of satellite cell activation involved in skeletal muscle regeneration | 1           | 1          | 0.00182 | 0.025 | [CAPN3]                           |
| GO:0060341 | regulation of cellular localization                                                       | 1           | 1          | 0.00182 | 0.025 | [CAMK2D]                          |
| GO:0000073 | spindle pole body separation                                                              | 1           | 1          | 0.00182 | 0.025 | [SON]                             |
| GO:0060314 | regulation of ryanodine-sensitive calcium-release channel                                 | 1           | 1          | 0.00182 | 0.025 | [CAMK2D]                          |
| GO:0033234 | negative regulation of protein sumoylation                                                | 1           | 1          | 0.00182 | 0.025 | [CAPN3]                           |
| GO:0051131 | chaperone-mediated protein complex assembly                                               | 1           | 1          | 0.00182 | 0.025 | [PFDN6]                           |
| GO:0010881 | regulation of cardiac muscle contraction                                                  | 1           | 1          | 0.00182 | 0.025 | [CAMK2D]                          |
| GO:0033124 | regulation of GTP catabolic process                                                       | 1           | 1          | 0.00182 | 0.025 | [PDE6D]                           |
| GO:0009308 | amine metabolic process                                                                   | 1           | 1          | 0.00182 | 0.025 | [AOC3]                            |
| GO:0006369 | termination of RNA polymerase II transcription                                            | 1           | 1          | 0.00182 | 0.025 | [MAZ]                             |
| GO:0061061 | muscle structure development                                                              | 1           | 1          | 0.00182 | 0.025 | [CAPN3]                           |
| GO:0007517 | muscle organ development                                                                  | 38          | 2          | 0.00221 | 0.017 | [CAPN3, FXR1]                     |
| GO:0043161 | proteasomal ubiquitin-dependent protein catabolic process                                 | 39          | 2          | 0.00233 | 0.017 | [PSMC5, WWP2]                     |
| GO:0032313 | regulation of Rab GTPase activity                                                         | 2           | 1          | 0.00364 | 0.021 | [TBC1D10B]                        |
| GO:0071472 | cellular response to salt stress                                                          | 2           | 1          | 0.00364 | 0.021 | [CAPN3]                           |
| GO:0030239 | myofibril assembly                                                                        | 2           | 1          | 0.00364 | 0.021 | [CAPN3]                           |
| GO:0045214 | sarcomere organization                                                                    | 2           | 1          | 0.00364 | 0.021 | [CAPN3]                           |
| GO:0002028 | regulation of sodium ion transport                                                        | 2           | 1          | 0.00364 | 0.021 | [ATP1A1]                          |
| GO:0046967 | cytosol to ER transport                                                                   | 2           | 1          | 0.00364 | 0.021 | [TAP1]                            |
| GO:0008615 | pyridoxine biosynthetic process                                                           | 2           | 1          | 0.00364 | 0.021 | [PNPO]                            |
| GO:0072657 | protein localization in membrane                                                          | 2           | 1          | 0.00364 | 0.021 | [CAPN3]                           |
| GO:0006468 | protein phosphorylation                                                                   | 185         | 3          | 0.00477 | 0.023 | [CAMK2D, CDC42BPA, OXSR1]         |
| GO:0019885 | antigen processing                                                                        | 3           | 1          | 0.00546 | 0.024 | [TAP1]                            |
| GO:0012501 | programmed cell death                                                                     | 3           | 1          | 0.00546 | 0.024 | [TOP1]                            |
| GO:0051224 | negative regulation of protein transport                                                  | 3           | 1          | 0.00546 | 0.024 | [WWP2]                            |
| GO:0050790 | regulation of catalytic activity                                                          | 3           | 1          | 0.00546 | 0.024 | [CAPN3]                           |



|            |                                                          |      |   |         |                                                      |
|------------|----------------------------------------------------------|------|---|---------|------------------------------------------------------|
| GO:0044314 | protein K27-linked ubiquitination                        | 4    | 1 | 0.00727 | 0.025 [UBE2D4]                                       |
| GO:0019060 | intracellular transport of viral proteins in host cell   | 4    | 1 | 0.00727 | 0.025 [TAP1]                                         |
| GO:0035519 | protein K29-linked ubiquitination                        | 4    | 1 | 0.00727 | 0.025 [UBE2D4]                                       |
| GO:0046716 | muscle cell homeostasis                                  | 4    | 1 | 0.00727 | 0.025 [CAPN3]                                        |
| GO:0010867 | positive regulation of triglyceride biosynthetic process | 4    | 1 | 0.00727 | 0.025 [SREBF1]                                       |
| GO:0032410 | negative regulation of transporter activity              | 4    | 1 | 0.00727 | 0.025 [WWP2]                                         |
| GO:0031032 | actomyosin structure organization                        | 4    | 1 | 0.00727 | 0.025 [CDC42BPA]                                     |
| GO:0043122 | regulation of I-kappaB kinase/NF-kappaB cascade          | 4    | 1 | 0.00727 | 0.025 [CAPN3]                                        |
| GO:0070189 | kynurenine metabolic process                             | 4    | 1 | 0.00727 | 0.025 [CCBL2]                                        |
| GO:0015833 | peptide transport                                        | 4    | 1 | 0.00727 | 0.025 [TAP1]                                         |
| GO:0051281 | positive regulation of release of sequestered calcium    | 4    | 1 | 0.00727 | 0.025 [CAPN3]                                        |
| GO:0010613 | positive regulation of cardiac muscle hypertrophy        | 4    | 1 | 0.00727 | 0.025 [CAMK2D]                                       |
| GO:0006098 | pentose-phosphate shunt                                  | 5    | 1 | 0.00908 | 0.026 [TPI1]                                         |
| GO:0045599 | negative regulation of fat cell differentiation          | 5    | 1 | 0.00908 | 0.026 [CCDC85B]                                      |
| GO:0008016 | regulation of heart contraction                          | 5    | 1 | 0.00908 | 0.026 [CAMK2D]                                       |
| GO:0043069 | negative regulation of programmed cell death             | 6    | 1 | 0.01089 | 0.03 [PSMC5]                                         |
| GO:0030326 | embryonic limb morphogenesis                             | 6    | 1 | 0.01089 | 0.03 [FBXW4]                                         |
| GO:0046718 | entry of virus into host cell                            | 7    | 1 | 0.01269 | 0.033 [WWP2]                                         |
| GO:0045862 | positive regulation of proteolysis                       | 7    | 1 | 0.01269 | 0.033 [CAPN3]                                        |
| GO:0085020 | protein K6-linked ubiquitination                         | 7    | 1 | 0.01269 | 0.033 [UBE2D4]                                       |
| GO:0035176 | social behavior                                          | 8    | 1 | 0.01449 | 0.036 [ANXA7]                                        |
| GO:0006520 | cellular amino acid metabolic process                    | 8    | 1 | 0.01449 | 0.036 [CCBL2]                                        |
| GO:0045892 | negative regulation of transcription, DNA-dependent      | 284  | 3 | 0.01527 | 0.036 [CAPN3, CCDC85B, ZNF219]                       |
| GO:0010388 | cullin deneddylation                                     | 9    | 1 | 0.01629 | 0.038 [COPS7A]                                       |
| GO:0001937 | negative regulation of endothelial cell proliferation    | 9    | 1 | 0.01629 | 0.038 [ATPIF1]                                       |
| GO:0051592 | response to calcium ion                                  | 10   | 1 | 0.01808 | 0.041 [CAPN3]                                        |
| GO:0046677 | response to antibiotic                                   | 11   | 1 | 0.01987 | 0.044 [AOC3]                                         |
| GO:0001516 | prostaglandin biosynthetic process                       | 12   | 1 | 0.02166 | 0.047 [PTGS1]                                        |
| GO:0000226 | microtubule cytoskeleton organization                    | 12   | 1 | 0.02166 | 0.047 [SON]                                          |
| GO:0045893 | positive regulation of transcription, DNA-dependent      | 334  | 3 | 0.02333 | 0.049 [CAPN3, PSMC5, SMARCA2]                        |
| GO:0006325 | chromatin organization                                   | 15   | 1 | 0.027   | 0.056 [HMG20A]                                       |
| GO:0071277 | cellular response to calcium ion                         | 15   | 1 | 0.027   | 0.056 [CAPN3]                                        |
| GO:0006355 | regulation of transcription, DNA-dependent               | 1254 | 6 | 0.02703 | 0.054 [GTF2A2, HMG20A, HNRNPUL1, MAZ, MLLT3, ZNF219] |
| GO:0009411 | response to UV                                           | 16   | 1 | 0.02877 | 0.057 [DDB2]                                         |
| GO:0051693 | actin filament capping                                   | 17   | 1 | 0.03054 | 0.059 [CAPZA2]                                       |

|            |                                                                |     |   |         |                           |
|------------|----------------------------------------------------------------|-----|---|---------|---------------------------|
| GO:0002504 | antigen processing and presentation of peptide                 | 17  | 1 | 0.03054 | 0.059 [HLA-DQA1]          |
| GO:0015031 | protein transport                                              | 383 | 3 | 0.03308 | 0.063 [ABRA, RAB5C, TAP1] |
| GO:0045944 | positive regulation of transcription                           | 158 | 2 | 0.03389 | 0.063 [SREBF1, STAT5B]    |
| GO:0043484 | regulation of RNA splicing                                     | 19  | 1 | 0.03408 | 0.063 [SON]               |
| GO:0016310 | phosphorylation                                                | 20  | 1 | 0.03584 | 0.065 [TOP1]              |
| GO:0008217 | regulation of blood pressure                                   | 20  | 1 | 0.03584 | 0.065 [PTGS1]             |
| GO:0031532 | actin cytoskeleton reorganization                              | 21  | 1 | 0.0376  | 0.066 [CDC42BPA]          |
| GO:0051726 | regulation of cell cycle                                       | 22  | 1 | 0.03935 | 0.069 [SON]               |
| GO:0006367 | transcription initiation from RNA polymerase II promoter       | 23  | 1 | 0.0411  | 0.071 [MAZ]               |
| GO:0008203 | cholesterol metabolic process                                  | 24  | 1 | 0.04285 | 0.073 [SREBF1]            |
| GO:0051865 | protein autoubiquitination                                     | 25  | 1 | 0.0446  | 0.074 [DDB2]              |
| GO:0051289 | protein homotetramerization                                    | 25  | 1 | 0.0446  | 0.074 [ATPIF1]            |
| GO:0070979 | protein K11-linked ubiquitination                              | 26  | 1 | 0.04634 | 0.075 [UBE2D4]            |
| GO:0006413 | translational initiation                                       | 26  | 1 | 0.04634 | 0.075 [EIF3I]             |
| GO:0008610 | lipid biosynthetic process                                     | 26  | 1 | 0.04634 | 0.075 [SREBF1]            |
| GO:0010629 | negative regulation of gene expression                         | 27  | 1 | 0.04808 | 0.076 [WWP2]              |
| GO:0006928 | cellular component movement                                    | 31  | 1 | 0.05501 | 0.085 [ARHGDIB]           |
| GO:0006461 | protein complex assembly                                       | 33  | 1 | 0.05845 | 0.09 [CAPN3]              |
| GO:0070936 | protein K48-linked ubiquitination                              | 34  | 1 | 0.06017 | 0.091 [UBE2D4]            |
| GO:0008202 | steroid metabolic process                                      | 36  | 1 | 0.06359 | 0.095 [SREBF1]            |
| GO:0006096 | glycolysis                                                     | 37  | 1 | 0.0653  | 0.096 [ENO3]              |
| GO:0000209 | protein polyubiquitination                                     | 37  | 1 | 0.0653  | 0.096 [DDB2]              |
| GO:0042493 | response to drug                                               | 38  | 1 | 0.06701 | 0.097 [TOP1]              |
| GO:0030521 | androgen receptor signaling pathway                            | 38  | 1 | 0.06701 | 0.097 [PMEPA1]            |
| GO:0001558 | regulation of cell growth                                      | 39  | 1 | 0.06871 | 0.097 [CAMK2D]            |
| GO:0006511 | ubiquitin-dependent protein catabolic process                  | 40  | 1 | 0.07041 | 0.099 [FBXW4]             |
| GO:0000910 | cytokinesis                                                    | 41  | 1 | 0.0721  | 0.1 [SON]                 |
| GO:0006633 | fatty acid biosynthetic process                                | 42  | 1 | 0.0738  | 0.101 [PTGS1]             |
| GO:0051260 | protein homooligomerization                                    | 43  | 1 | 0.07549 | 0.103 [ATPIF1]            |
| GO:0051092 | positive regulation of NF-kappaB transcription factor activity | 45  | 1 | 0.07886 | 0.105 [CAPN3]             |
| GO:0007243 | intracellular protein kinase cascade                           | 45  | 1 | 0.07886 | 0.105 [OXSRI]             |
| GO:0006869 | lipid transport                                                | 46  | 1 | 0.08054 | 0.106 [SPNS1]             |
| GO:0006351 | transcription, DNA-dependent                                   | 48  | 1 | 0.08389 | 0.109 [ZNF219]            |
| GO:0040008 | regulation of growth                                           | 51  | 1 | 0.0889  | 0.115 [CCDC85B]           |
| GO:0030308 | negative regulation of cell growth                             | 58  | 1 | 0.10047 | 0.128 [CCDC85B]           |
| GO:0016477 | cell migration                                                 | 67  | 1 | 0.11514 | 0.146 [CDC42BPA]          |

|            |                                          |     |   |         |                           |
|------------|------------------------------------------|-----|---|---------|---------------------------|
| GO:0006457 | protein folding                          | 68  | 1 | 0.11676 | 0.146 [PFDN6]             |
| GO:0006364 | rRNA processing                          | 80  | 1 | 0.13592 | 0.169 [NOC4L]             |
| GO:0006916 | anti-apoptosis                           | 84  | 1 | 0.14221 | 0.175 [SON]               |
| GO:0016055 | Wnt receptor signaling pathway           | 87  | 1 | 0.1469  | 0.179 [FBXW4]             |
| GO:0007601 | visual perception                        | 97  | 1 | 0.16236 | 0.196 [PDE6D]             |
| GO:0000398 | nuclear mRNA splicing, via spliceosome   | 98  | 1 | 0.16389 | 0.196 [NAA38]             |
| GO:0016567 | protein ubiquitination                   | 99  | 1 | 0.16542 | 0.196 [WWP2]              |
| GO:0006813 | potassium ion transport                  | 102 | 1 | 0.16998 | 0.198 [ATP1A1]            |
| GO:0001525 | angiogenesis                             | 102 | 1 | 0.16998 | 0.198 [ATPIF1]            |
| GO:0006950 | response to stress                       | 104 | 1 | 0.17301 | 0.199 [HSPA1A]            |
| GO:0043066 | negative regulation of apoptotic process | 118 | 1 | 0.19392 | 0.221 [CAPN3]             |
| GO:0006954 | inflammatory response                    | 128 | 1 | 0.20853 | 0.236 [AOC3]              |
| GO:0006508 | proteolysis                              | 476 | 2 | 0.21539 | 0.242 [CAPN3, PSMC5]      |
| GO:0008219 | cell death                               | 136 | 1 | 0.22004 | 0.245 [DNAJC5]            |
| GO:0030154 | cell differentiation                     | 484 | 2 | 0.22073 | 0.243 [CCDC85B, FXR1]     |
| GO:0006397 | mRNA processing                          | 144 | 1 | 0.23137 | 0.253 [SON]               |
| GO:0008380 | RNA splicing                             | 150 | 1 | 0.23977 | 0.26 [NAA38]              |
| GO:0008150 | biological_process                       | 588 | 2 | 0.29082 | 0.313 [TMEM100, TMEM126B] |
| GO:0007399 | nervous system development               | 214 | 1 | 0.32388 | 0.345 [SMARCA2]           |
| GO:0006955 | immune response                          | 220 | 1 | 0.33128 | 0.35 [HLA-DQA1]           |
| GO:0016568 | chromatin modification                   | 221 | 1 | 0.3325  | 0.349 [HMG20A]            |
| GO:0006915 | apoptotic process                        | 321 | 1 | 0.44445 | 0.462 [CAPN3]             |
| GO:0006810 | transport                                | 395 | 1 | 0.51515 | 0.532 [G3BP1]             |
| GO:0007049 | cell cycle                               | 405 | 1 | 0.52399 | 0.536 [ERH]               |
| GO:0007155 | cell adhesion                            | 420 | 1 | 0.53696 | 0.545 [AOC3]              |
| GO:0007275 | multicellular organismal development     | 822 | 2 | 0.66339 | 0.669 [FBXW4, FXR1]       |
| GO:0050896 | response to stimulus                     | 589 | 1 | 1       | 1 [PDE6D]                 |

---

Table S13-1. GO annotation analysis of the module eigengene in 13 postnatal highly LT-specific modules (LT\_black).

| GO ID      | GO Name                                                                                                                         | Total Count | Diff Count | P Value | FDR    | Gene                                 |
|------------|---------------------------------------------------------------------------------------------------------------------------------|-------------|------------|---------|--------|--------------------------------------|
| GO:0044419 | interspecies interaction between organisms                                                                                      | 315         | 5          | 6E-05   | 0.0052 | [ACOT8, CBX5, EIF4G1, SLC25A5, VAPB] |
| GO:0035441 | cell migration involved in vasculogenesis                                                                                       | 1           | 1          | 0.0013  | 0.0236 | [PDGFRB]                             |
| GO:0035791 | platelet-derived growth factor receptor-beta signaling pathway                                                                  | 1           | 1          | 0.0013  | 0.0236 | [PDGFRB]                             |
| GO:0050774 | negative regulation of dendrite morphogenesis                                                                                   | 1           | 1          | 0.0013  | 0.0236 | [YWHAH]                              |
| GO:0006713 | glucocorticoid catabolic process                                                                                                | 1           | 1          | 0.0013  | 0.0236 | [YWHAH]                              |
| GO:0072262 | metanephric glomerular mesangial cell proliferation involved in metanephros development                                         | 1           | 1          | 0.0013  | 0.0236 | [PDGFRB]                             |
| GO:0071228 | cellular response to tumor cell                                                                                                 | 1           | 1          | 0.0013  | 0.0236 | [TXNIP]                              |
| GO:0060981 | cell migration involved in coronary angiogenesis                                                                                | 1           | 1          | 0.0013  | 0.0236 | [PDGFRB]                             |
| GO:0006084 | acetyl-CoA metabolic process                                                                                                    | 2           | 1          | 0.0026  | 0.0225 | [ACACB]                              |
| GO:0061298 | retina vasculature development in camera-type eye                                                                               | 2           | 1          | 0.0026  | 0.0225 | [PDGFRB]                             |
| GO:0014911 | positive regulation of smooth muscle cell migration                                                                             | 2           | 1          | 0.0026  | 0.0225 | [PDGFRB]                             |
| GO:0032516 | positive regulation of phosphoprotein phosphatase activity                                                                      | 2           | 1          | 0.0026  | 0.0225 | [PDGFRB]                             |
| GO:0072277 | metanephric glomerular capillary formation                                                                                      | 3           | 1          | 0.0039  | 0.0228 | [PDGFRB]                             |
| GO:0007035 | vacuolar acidification                                                                                                          | 3           | 1          | 0.0039  | 0.0228 | [ATP6V0E1]                           |
| GO:0055003 | cardiac myofibril assembly                                                                                                      | 3           | 1          | 0.0039  | 0.0228 | [PDGFRB]                             |
| GO:0051782 | negative regulation of cell division                                                                                            | 3           | 1          | 0.0039  | 0.0228 | [TXNIP]                              |
| GO:0035793 | positive regulation of metanephric mesenchymal cell migration by platelet-derived growth factor receptor-beta signaling pathway | 3           | 1          | 0.0039  | 0.0228 | [PDGFRB]                             |
| GO:0090280 | positive regulation of calcium ion import                                                                                       | 3           | 1          | 0.0039  | 0.0228 | [PDGFRB]                             |
| GO:0042921 | glucocorticoid receptor signaling pathway                                                                                       | 4           | 1          | 0.0052  | 0.0242 | [YWHAH]                              |
| GO:0050921 | positive regulation of chemotaxis                                                                                               | 4           | 1          | 0.0052  | 0.0242 | [PDGFRB]                             |
| GO:0045070 | positive regulation of viral genome replication                                                                                 | 5           | 1          | 0.0065  | 0.0256 | [VAPB]                               |
| GO:0045116 | protein neddylation                                                                                                             | 5           | 1          | 0.0065  | 0.0256 | [UBE2F]                              |
| GO:0046488 | phosphatidylinositol metabolic process                                                                                          | 5           | 1          | 0.0065  | 0.0256 | [PDGFRB]                             |
| GO:0006729 | tetrahydrobiopterin biosynthetic process                                                                                        | 5           | 1          | 0.0065  | 0.0256 | [QDPR]                               |
| GO:0010863 | positive regulation of phospholipase C activity                                                                                 | 5           | 1          | 0.0065  | 0.0256 | [PDGFRB]                             |
| GO:0000398 | nuclear mRNA splicing, via spliceosome                                                                                          | 98          | 2          | 0.0073  | 0.0255 | [MAGOH, SNRPD1]                      |
| GO:2000379 | positive regulation of reactive oxygen species metabolic process                                                                | 6           | 1          | 0.0078  | 0.0252 | [PDGFRB]                             |
| GO:2000573 | positive regulation of DNA biosynthetic process                                                                                 | 6           | 1          | 0.0078  | 0.0252 | [PDGFRB]                             |
| GO:0048008 | platelet-derived growth factor receptor signaling pathway                                                                       | 6           | 1          | 0.0078  | 0.0252 | [PDGFRB]                             |
| GO:0019048 | virus-host interaction                                                                                                          | 7           | 1          | 0.0091  | 0.027  | [VAPB]                               |

|            |                                                                                    |     |   |        |        |                         |
|------------|------------------------------------------------------------------------------------|-----|---|--------|--------|-------------------------|
| GO:0042752 | regulation of circadian rhythm                                                     | 7   | 1 | 0.0091 | 0.027  | [FBXL3]                 |
| GO:0045664 | regulation of neuron differentiation                                               | 8   | 1 | 0.0103 | 0.0294 | [YWHAH]                 |
| GO:0030968 | endoplasmic reticulum unfolded protein response                                    | 9   | 1 | 0.0116 | 0.0311 | [VAPB]                  |
| GO:0045840 | positive regulation of mitosis                                                     | 9   | 1 | 0.0116 | 0.0311 | [PDGFRB]                |
| GO:0009165 | nucleotide biosynthetic process                                                    | 9   | 1 | 0.0116 | 0.0311 | [PRPSAP1]               |
| GO:0001654 | eye development                                                                    | 10  | 1 | 0.0129 | 0.0318 | [RAB18]                 |
| GO:0048167 | regulation of synaptic plasticity                                                  | 10  | 1 | 0.0129 | 0.0318 | [YWHAH]                 |
| GO:0048661 | positive regulation of smooth muscle cell proliferation                            | 10  | 1 | 0.0129 | 0.0318 | [PDGFRB]                |
| GO:0008219 | cell death                                                                         | 136 | 2 | 0.0136 | 0.0318 | [EIF4G1, VAPB]          |
| GO:0007596 | blood coagulation                                                                  | 11  | 1 | 0.0142 | 0.0323 | [ANXA8]                 |
| GO:0007165 | signal transduction                                                                | 141 | 2 | 0.0146 | 0.0323 | [IGSF1, PDGFRB]         |
| GO:0016925 | protein sumoylation                                                                | 12  | 1 | 0.0155 | 0.0331 | [SUMO2]                 |
| GO:0032436 | positive regulation of proteasomal ubiquitin-dependent protein catabolic process   | 12  | 1 | 0.0155 | 0.0331 | [SUMO2]                 |
| GO:0043552 | positive regulation of phosphatidylinositol 3-kinase activity                      | 13  | 1 | 0.0168 | 0.0339 | [PDGFRB]                |
| GO:0006446 | regulation of translational initiation                                             | 13  | 1 | 0.0168 | 0.0339 | [EIF4G1]                |
| GO:0006352 | transcription initiation, DNA-dependent                                            | 13  | 1 | 0.0168 | 0.0339 | [TAF12]                 |
| GO:0031146 | SCF-dependent proteasomal ubiquitin-dependent protein catabolic process            | 14  | 1 | 0.018  | 0.0345 | [FBXL3]                 |
| GO:0043406 | positive regulation of MAP kinase activity                                         | 14  | 1 | 0.018  | 0.0345 | [PDGFRB]                |
| GO:0050680 | negative regulation of epithelial cell proliferation                               | 15  | 1 | 0.0193 | 0.0348 | [MAGED1]                |
| GO:0007031 | peroxisome organization                                                            | 15  | 1 | 0.0193 | 0.0348 | [ACOT8]                 |
| GO:0048511 | rhythmic process                                                                   | 15  | 1 | 0.0193 | 0.0348 | [FBXL3]                 |
| GO:0060326 | cell chemotaxis                                                                    | 15  | 1 | 0.0193 | 0.0348 | [PDGFRB]                |
| GO:0007264 | small GTPase mediated signal transduction                                          | 16  | 1 | 0.0206 | 0.0353 | [RAB18]                 |
| GO:0014068 | positive regulation of phosphatidylinositol 3-kinase cascade                       | 19  | 1 | 0.0244 | 0.0411 | [PDGFRB]                |
| GO:0051091 | positive regulation of sequence-specific DNA binding transcription factor activity | 20  | 1 | 0.0257 | 0.0425 | [TAF12]                 |
| GO:0006367 | transcription initiation from RNA polymerase II promoter                           | 23  | 1 | 0.0295 | 0.0479 | [TAF12]                 |
| GO:0006464 | protein modification process                                                       | 24  | 1 | 0.0307 | 0.049  | [WDYHV1]                |
| GO:0051289 | protein homotetramerization                                                        | 25  | 1 | 0.032  | 0.0497 | [ACACB]                 |
| GO:0048015 | phosphatidylinositol-mediated signaling                                            | 25  | 1 | 0.032  | 0.0497 | [PDGFRB]                |
| GO:0043966 | histone H3 acetylation                                                             | 27  | 1 | 0.0345 | 0.0519 | [TAF12]                 |
| GO:0000184 | nuclear-transcribed mRNA catabolic process, nonsense-mediated decay                | 27  | 1 | 0.0345 | 0.0519 | [MAGOH]                 |
| GO:0030216 | keratinocyte differentiation                                                       | 29  | 1 | 0.037  | 0.0543 | [TXNIP]                 |
| GO:0016049 | cell growth                                                                        | 30  | 1 | 0.0382 | 0.0552 | [ATP6V0E1]              |
| GO:0018108 | peptidyl-tyrosine phosphorylation                                                  | 32  | 1 | 0.0407 | 0.0579 | [PDGFRB]                |
| GO:0008150 | biological_process                                                                 | 588 | 3 | 0.0411 | 0.0575 | [MYOZ2, TMEM131, WDR74] |
| GO:0007420 | brain development                                                                  | 33  | 1 | 0.042  | 0.0579 | [RAB18]                 |

|            |                                                                      |      |   |        |        |                        |
|------------|----------------------------------------------------------------------|------|---|--------|--------|------------------------|
| GO:0070374 | positive regulation of ERK1 and ERK2 cascade                         | 39   | 1 | 0.0494 | 0.0672 | [PDGFRB]               |
| GO:0006886 | intracellular protein transport                                      | 41   | 1 | 0.0519 | 0.0695 | [YWHAH]                |
| GO:0045892 | negative regulation of transcription, DNA-dependent                  | 284  | 2 | 0.0528 | 0.0696 | [CBX5, PER1]           |
| GO:0006633 | fatty acid biosynthetic process                                      | 42   | 1 | 0.0531 | 0.0691 | [ACACB]                |
| GO:0007059 | chromosome segregation                                               | 55   | 1 | 0.069  | 0.0885 | [SLC25A5]              |
| GO:0045893 | positive regulation of transcription, DNA-dependent                  | 334  | 2 | 0.0701 | 0.0886 | [FOXO1, YWHAH]         |
| GO:0006417 | regulation of translation                                            | 59   | 1 | 0.0739 | 0.0921 | [MAGOH]                |
| GO:0042981 | regulation of apoptotic process                                      | 65   | 1 | 0.0811 | 0.0997 | [MAGED1]               |
| GO:0016477 | cell migration                                                       | 67   | 1 | 0.0834 | 0.1013 | [PDGFRB]               |
| GO:0006457 | protein folding                                                      | 68   | 1 | 0.0846 | 0.1013 | [PPIL2]                |
| GO:0006629 | lipid metabolic process                                              | 69   | 1 | 0.0858 | 0.1014 | [GDE1]                 |
| GO:0015031 | protein transport                                                    | 383  | 2 | 0.0886 | 0.1034 | [PREB, RAB18]          |
| GO:0007275 | multicellular organismal development                                 | 822  | 3 | 0.0913 | 0.1051 | [HOPX, PDGFRB, RAB18]  |
| GO:0006897 | endocytosis                                                          | 83   | 1 | 0.1023 | 0.1164 | [RAB18]                |
| GO:0006916 | anti-apoptosis                                                       | 84   | 1 | 0.1035 | 0.1163 | [FOXO1]                |
| GO:0016567 | protein ubiquitination                                               | 99   | 1 | 0.1209 | 0.1341 | [FBXL3]                |
| GO:0008284 | positive regulation of cell proliferation                            | 102  | 1 | 0.1243 | 0.1363 | [PDGFRB]               |
| GO:0006950 | response to stress                                                   | 104  | 1 | 0.1266 | 0.1363 | [HSF2]                 |
| GO:0016192 | vesicle-mediated transport                                           | 104  | 1 | 0.1266 | 0.1363 | [PREB]                 |
| GO:0046777 | protein autophosphorylation                                          | 107  | 1 | 0.13   | 0.1375 | [PDGFRB]               |
| GO:0045944 | positive regulation of transcription from RNA polymerase II promoter | 158  | 1 | 0.1859 | 0.1945 | [FOXO1]                |
| GO:0006355 | regulation of transcription, DNA-dependent                           | 1254 | 3 | 0.2226 | 0.2301 | [IGSF1, MAGED1, TXNIP] |
| GO:0006810 | transport                                                            | 395  | 1 | 0.4029 | 0.4119 | [MAGOH]                |
| GO:0007049 | cell cycle                                                           | 405  | 1 | 0.4107 | 0.4152 | [TXNIP]                |
| GO:0006811 | ion transport                                                        | 455  | 1 | 0.4481 | 0.4481 | [ATP6V0E1]             |

---

Table S13-2. GO annotation analysis of the module eigengene in 13 postnatal highly LT-specific modules (LT\_darkmagenta).

| GO ID      | GO Name                                                              | Total Count | Diff Count | P Value   | FDR       | Gene     |
|------------|----------------------------------------------------------------------|-------------|------------|-----------|-----------|----------|
| GO:0032075 | positive regulation of nuclease activity                             | 1           | 1          | 0.0004557 | 0.0141265 | [HMGB2]  |
| GO:0006288 | base-excision repair, DNA ligation                                   | 2           | 1          | 0.0009112 | 0.0141235 | [HMGB2]  |
| GO:0006265 | DNA topological change                                               | 3           | 1          | 0.0013665 | 0.0141204 | [HMGB2]  |
| GO:0045654 | positive regulation of megakaryocyte differentiation                 | 4           | 1          | 0.0018216 | 0.0112939 | [HMGB2]  |
| GO:0051103 | DNA ligation involved in DNA repair                                  | 4           | 1          | 0.0018216 | 0.0112939 | [HMGB2]  |
| GO:0045648 | positive regulation of erythrocyte differentiation                   | 4           | 1          | 0.0018216 | 0.0112939 | [HMGB2]  |
| GO:0071222 | cellular response to lipopolysaccharide                              | 6           | 1          | 0.0027312 | 0.0120954 | [HMGB2]  |
| GO:0033151 | V(D)J recombination                                                  | 7           | 1          | 0.0031857 | 0.0123447 | [HMGB2]  |
| GO:0043388 | positive regulation of DNA binding                                   | 10          | 1          | 0.0045481 | 0.0156656 | [HMGB2]  |
| GO:0032008 | positive regulation of TOR signaling cascade                         | 12          | 1          | 0.0054553 | 0.0169115 | [RHEB]   |
| GO:0006730 | one-carbon metabolic process                                         | 13          | 1          | 0.0059087 | 0.0166517 | [SHMT2]  |
| GO:0006325 | chromatin organization                                               | 15          | 1          | 0.0068147 | 0.0162506 | [HMGB2]  |
| GO:0055072 | iron ion homeostasis                                                 | 15          | 1          | 0.0068147 | 0.0162506 | [SFXN4]  |
| GO:0060326 | cell chemotaxis                                                      | 15          | 1          | 0.0068147 | 0.0162506 | [HMGB2]  |
| GO:0001938 | positive regulation of endothelial cell proliferation                | 17          | 1          | 0.00772   | 0.0159548 | [HMGB2]  |
| GO:0006953 | acute-phase response                                                 | 20          | 1          | 0.0090765 | 0.0175857 | [ITIH4]  |
| GO:0048015 | phosphatidylinositol-mediated signaling                              | 25          | 1          | 0.0113334 | 0.0206667 | [HMGB2]  |
| GO:0006334 | nucleosome assembly                                                  | 28          | 1          | 0.0126852 | 0.0218467 | [HMGB2]  |
| GO:0006357 | regulation of transcription from RNA polymerase II promoter          | 38          | 1          | 0.0171784 | 0.0280279 | [HMGB2]  |
| GO:0007229 | integrin-mediated signaling pathway                                  | 57          | 1          | 0.0256621 | 0.0397763 | [ITGA9]  |
| GO:0006364 | rRNA processing                                                      | 80          | 1          | 0.0358388 | 0.0529049 | [FBL]    |
| GO:0006897 | endocytosis                                                          | 83          | 1          | 0.0371587 | 0.05236   | [NECAP1] |
| GO:0006397 | mRNA processing                                                      | 144         | 1          | 0.0636278 | 0.0857592 | [RBM10]  |
| GO:0008380 | RNA splicing                                                         | 150         | 1          | 0.0661936 | 0.0855001 | [RBM10]  |
| GO:0045944 | positive regulation of transcription from RNA polymerase II promoter | 158         | 1          | 0.0696044 | 0.0863094 | [HMGB2]  |
| GO:0044419 | interspecies interaction between organisms                           | 315         | 1          | 0.1341926 | 0.1599989 | [PSMB5]  |
| GO:0045893 | positive regulation of transcription, DNA-dependent                  | 334         | 1          | 0.1417136 | 0.1627082 | [HMGB2]  |
| GO:0015031 | protein transport                                                    | 383         | 1          | 0.1608244 | 0.1780556 | [NECAP1] |
| GO:0007155 | cell adhesion                                                        | 420         | 1          | 0.1749864 | 0.1870544 | [ITGA9]  |
| GO:0008150 | biological_process                                                   | 588         | 1          | 0.236482  | 0.2443647 | [RBM10]  |
| GO:0006355 | regulation of transcription, DNA-dependent                           | 1254        | 1          | 0.4400409 | 0.4400409 | [PLAGL1] |

Table S13-3. GO annotation analysis of the module eigengene in 13 postnatal highly LT-specific modules (LT\_grey60).

| GO ID      | GO Name                                                            | Total Count | Diff Count | P Value   | FDR       | Gene              |
|------------|--------------------------------------------------------------------|-------------|------------|-----------|-----------|-------------------|
| GO:0042254 | ribosome biogenesis                                                | 22          | 2          | 0.000204  | 0.0148933 | [GNL3L, MRTO4]    |
| GO:0007220 | Notch receptor processing                                          | 1           | 1          | 0.000957  | 0.0127015 | [APH1A]           |
| GO:0001759 | organ induction                                                    | 1           | 1          | 0.000957  | 0.0127015 | [SIX1]            |
| GO:0043128 | positive regulation of 1-phosphatidylinositol 4-kinase activity    | 1           | 1          | 0.000957  | 0.0127015 | [CD81]            |
| GO:0072095 | regulation of branch elongation involved in ureteric bud branching | 1           | 1          | 0.000957  | 0.0127015 | [SIX1]            |
| GO:0031293 | membrane protein intracellular domain proteolysis                  | 1           | 1          | 0.000957  | 0.0127015 | [APH1A]           |
| GO:0072172 | mesonephric tubule formation                                       | 1           | 1          | 0.000957  | 0.0127015 | [SIX1]            |
| GO:0010626 | negative regulation of Schwann cell proliferation                  | 1           | 1          | 0.000957  | 0.0127015 | [RNF10]           |
| GO:0046813 | virion attachment, binding of host cell surface receptor           | 1           | 1          | 0.000957  | 0.0127015 | [CD81]            |
| GO:0045824 | negative regulation of innate immune response                      | 2           | 1          | 0.001913  | 0.0116376 | [TRAFD1]          |
| GO:0051451 | myoblast migration                                                 | 2           | 1          | 0.001913  | 0.0116376 | [SIX1]            |
| GO:0016557 | peroxisome membrane biogenesis                                     | 2           | 1          | 0.001913  | 0.0116376 | [PEX19]           |
| GO:0031643 | positive regulation of myelination                                 | 2           | 1          | 0.001913  | 0.0116376 | [RNF10]           |
| GO:0042987 | amyloid precursor protein catabolic process                        | 2           | 1          | 0.001913  | 0.0116376 | [APH1A]           |
| GO:0006364 | rRNA processing                                                    | 80          | 2          | 0.0026945 | 0.0131132 | [GAR1, MPHOSPH10] |
| GO:0072107 | positive regulation of ureteric bud formation                      | 3           | 1          | 0.0028682 | 0.0119645 | [SIX1]            |
| GO:0006999 | nuclear pore organization                                          | 3           | 1          | 0.0028682 | 0.0119645 | [NUP133]          |
| GO:0048011 | nerve growth factor receptor signaling pathway                     | 3           | 1          | 0.0028682 | 0.0119645 | [ZFYVE27]         |
| GO:0060612 | adipose tissue development                                         | 3           | 1          | 0.0028682 | 0.0119645 | [ARID5B]          |
| GO:0048701 | embryonic cranial skeleton morphogenesis                           | 4           | 1          | 0.0038225 | 0.013952  | [SIX1]            |
| GO:0046488 | phosphatidylinositol metabolic process                             | 5           | 1          | 0.0047759 | 0.0162157 | [CD81]            |
| GO:0048699 | generation of neurons                                              | 5           | 1          | 0.0047759 | 0.0162157 | [SIX1]            |
| GO:0072075 | metanephric mesenchyme development                                 | 6           | 1          | 0.0057284 | 0.0170682 | [SIX1]            |
| GO:0048839 | inner ear development                                              | 6           | 1          | 0.0057284 | 0.0170682 | [SIX1]            |
| GO:0001889 | liver development                                                  | 6           | 1          | 0.0057284 | 0.0170682 | [ARID5B]          |
| GO:0006398 | histone mRNA 3'-end processing                                     | 6           | 1          | 0.0057284 | 0.0170682 | [CPSF2]           |
| GO:0007389 | pattern specification process                                      | 7           | 1          | 0.00668   | 0.0159881 | [SIX1]            |
| GO:0048704 | embryonic skeletal system morphogenesis                            | 7           | 1          | 0.00668   | 0.0159881 | [SIX1]            |
| GO:0048538 | thymus development                                                 | 7           | 1          | 0.00668   | 0.0159881 | [SIX1]            |



|            |                                                                                    |     |   |           |           |               |
|------------|------------------------------------------------------------------------------------|-----|---|-----------|-----------|---------------|
| GO:0030878 | thyroid gland development                                                          | 7   | 1 | 0.00668   | 0.0159881 | [SIX1]        |
| GO:0007519 | skeletal muscle tissue development                                                 | 7   | 1 | 0.00668   | 0.0159881 | [SIX1]        |
| GO:0006625 | protein targeting to peroxisome                                                    | 7   | 1 | 0.00668   | 0.0159881 | [PEX19]       |
| GO:0046718 | entry of virus into host cell                                                      | 7   | 1 | 0.00668   | 0.0159881 | [CD81]        |
| GO:0072659 | protein localization in plasma membrane                                            | 7   | 1 | 0.00668   | 0.0159881 | [ZFYVE27]     |
| GO:0006396 | RNA processing                                                                     | 8   | 1 | 0.0076307 | 0.0156913 | [MPHOSPH10]   |
| GO:0045664 | regulation of neuron differentiation                                               | 8   | 1 | 0.0076307 | 0.0156913 | [SIX1]        |
| GO:0042472 | inner ear morphogenesis                                                            | 9   | 1 | 0.0085805 | 0.0169291 | [SIX1]        |
| GO:0001657 | ureteric bud development                                                           | 10  | 1 | 0.0095295 | 0.0178372 | [SIX1]        |
| GO:0090190 | positive regulation of branching involved in ureteric bud morphogenesis            | 10  | 1 | 0.0095295 | 0.0178372 | [SIX1]        |
| GO:0006661 | phosphatidylinositol biosynthetic process                                          | 10  | 1 | 0.0095295 | 0.0178372 | [CD81]        |
| GO:0045944 | positive regulation of transcription from RNA polymerase II promoter               | 158 | 2 | 0.0100895 | 0.0179643 | [RNF10, SIX1] |
| GO:0034504 | protein localization to nucleus                                                    | 11  | 1 | 0.0104775 | 0.0182109 | [SIX1]        |
| GO:0071108 | protein K48-linked deubiquitination                                                | 12  | 1 | 0.0114247 | 0.0193954 | [OTUB1]       |
| GO:0001658 | branching involved in ureteric bud morphogenesis                                   | 14  | 1 | 0.0133164 | 0.0220931 | [SIX1]        |
| GO:0007031 | peroxisome organization                                                            | 15  | 1 | 0.0142609 | 0.0231343 | [PEX19]       |
| GO:0050731 | positive regulation of peptidyl-tyrosine phosphorylation                           | 16  | 1 | 0.0152045 | 0.0241289 | [CD81]        |
| GO:0030855 | epithelial cell differentiation                                                    | 17  | 1 | 0.0161473 | 0.0250798 | [SIX1]        |
| GO:0000187 | activation of MAPK activity                                                        | 18  | 1 | 0.0170892 | 0.0257218 | [CD81]        |
| GO:0001822 | kidney development                                                                 | 18  | 1 | 0.0170892 | 0.0257218 | [SIX1]        |
| GO:0051091 | positive regulation of sequence-specific DNA binding transcription factor activity | 20  | 1 | 0.0189703 | 0.0276966 | [ARID5B]      |
| GO:0031175 | neuron projection development                                                      | 21  | 1 | 0.0199095 | 0.0282212 | [ZFYVE27]     |
| GO:0008104 | protein localization                                                               | 21  | 1 | 0.0199095 | 0.0282212 | [CD81]        |
| GO:0043524 | negative regulation of neuron apoptosis                                            | 22  | 1 | 0.0208478 | 0.0281832 | [SIX1]        |
| GO:0006406 | mRNA export from nucleus                                                           | 22  | 1 | 0.0208478 | 0.0281832 | [NUP133]      |
| GO:0000375 | RNA splicing, via transesterification reactions                                    | 22  | 1 | 0.0208478 | 0.0281832 | [MPHOSPH10]   |
| GO:0001666 | response to hypoxia                                                                | 32  | 1 | 0.0301833 | 0.0393461 | [HMOX2]       |
| GO:0006986 | response to unfolded protein                                                       | 35  | 1 | 0.032967  | 0.0422208 | [DNAJB5]      |
| GO:0030521 | androgen receptor signaling pathway                                                | 38  | 1 | 0.0357428 | 0.0449866 | [PMEPA1]      |
| GO:0001558 | regulation of cell growth                                                          | 39  | 1 | 0.0366664 | 0.0453669 | [CD320]       |
| GO:0045893 | positive regulation of transcription, DNA-dependent                                | 334 | 2 | 0.0407131 | 0.0495342 | [RNF10, SIX1] |
| GO:0006351 | transcription, DNA-dependent                                                       | 48  | 1 | 0.0449396 | 0.0537802 | [SIX1]        |
| GO:0010923 | negative regulation of phosphatase activity                                        | 50  | 1 | 0.0467686 | 0.0550663 | [MPHOSPH10]   |

|            |                                                     |      |   |           |           |                     |
|------------|-----------------------------------------------------|------|---|-----------|-----------|---------------------|
| GO:0015031 | protein transport                                   | 383  | 2 | 0.0520181 | 0.0602749 | [NMD3, NUP133]      |
| GO:0006508 | proteolysis                                         | 476  | 2 | 0.0760842 | 0.0867836 | [OTUB1, THOP1]      |
| GO:0000398 | nuclear mRNA splicing, via spliceosome              | 98   | 1 | 0.0896543 | 0.1006886 | [U2AF1]             |
| GO:0008284 | positive regulation of cell proliferation           | 102  | 1 | 0.0931418 | 0.1030205 | [CD81]              |
| GO:0009615 | response to virus                                   | 114  | 1 | 0.1035264 | 0.1127974 | [CCT5]              |
| GO:0006412 | translation                                         | 130  | 1 | 0.1171921 | 0.1258092 | [MRPL36]            |
| GO:0006355 | regulation of transcription, DNA-dependent          | 1254 | 3 | 0.1178806 | 0.1247143 | [CCNC, MLLT3, SIX1] |
| GO:0008219 | cell death                                          | 136  | 1 | 0.1222642 | 0.127504  | [ZFYVE27]           |
| GO:0008380 | RNA splicing                                        | 150  | 1 | 0.1339885 | 0.1377628 | [MPHOSPH10]         |
| GO:0045892 | negative regulation of transcription, DNA-dependent | 284  | 1 | 0.2387455 | 0.2420614 | [PHB2]              |
| GO:0044419 | interspecies interaction between organisms          | 315  | 1 | 0.261158  | 0.261158  | [CD81]              |

---

Table S13-4. GO annotation analysis of the module eigengene in 13 postnatal highly LT-specific modules (LT\_lightgreen).

| GO ID      | GO Name                                     | Total Count | Diff Count | P Value   | FDR       | Gene     |
|------------|---------------------------------------------|-------------|------------|-----------|-----------|----------|
| GO:0051089 | constitutive protein ectodomain proteolysis | 1           | 1          | 0.0002051 | 0.003281  | [ADAM10] |
| GO:0048870 | cell motility                               | 7           | 1          | 0.0014347 | 0.0114772 | [FSCN1]  |
| GO:0006509 | membrane protein ectodomain proteolysis     | 8           | 1          | 0.0016395 | 0.0087438 | [ADAM10] |
| GO:0051017 | actin filament bundle assembly              | 11          | 1          | 0.0022536 | 0.0090145 | [FSCN1]  |
| GO:0007162 | negative regulation of cell adhesion        | 13          | 1          | 0.0026629 | 0.0085213 | [ADAM10] |
| GO:0001701 | in utero embryonic development              | 14          | 1          | 0.0028675 | 0.0076466 | [ADAM10] |
| GO:0007219 | Notch signaling pathway                     | 30          | 1          | 0.0061356 | 0.0140243 | [ADAM10] |
| GO:0007267 | cell-cell signaling                         | 42          | 1          | 0.0085805 | 0.017161  | [ADAM10] |
| GO:0030036 | actin cytoskeleton organization             | 43          | 1          | 0.008784  | 0.015616  | [FSCN1]  |
| GO:0007229 | integrin-mediated signaling pathway         | 57          | 1          | 0.0116291 | 0.0186066 | [ADAM10] |
| GO:0016477 | cell migration                              | 67          | 1          | 0.0136568 | 0.0198645 | [FSCN1]  |
| GO:0016042 | lipid catabolic process                     | 87          | 1          | 0.0177013 | 0.0236017 | [PLA2G7] |
| GO:0006468 | protein phosphorylation                     | 185         | 1          | 0.0373066 | 0.0459158 | [ADAM10] |
| GO:0016568 | chromatin modification                      | 221         | 1          | 0.0444207 | 0.0507665 | [SETDB1] |
| GO:0006508 | proteolysis                                 | 476         | 1          | 0.0934889 | 0.0997215 | [ADAM10] |
| GO:0006355 | regulation of transcription, DNA-dependent  | 1254        | 1          | 0.2296559 | 0.2296559 | [SETDB1] |

Table S13-5. GO annotation analysis of the module eigengene in 13 postnatal highly LT-specific modules (LT\_lightyellow).

| GO ID      | GO Name                                                                           | Total Count | Diff Count | P Value | FDR    | Gene           |
|------------|-----------------------------------------------------------------------------------|-------------|------------|---------|--------|----------------|
| GO:0044319 | wound healing, spreading of cells                                                 | 1           | 1          | 0.00071 | 0.0085 | [DDR1]         |
| GO:0045964 | positive regulation of dopamine metabolic process                                 | 1           | 1          | 0.00071 | 0.0085 | [HPRT1]        |
| GO:0038083 | peptidyl-tyrosine autophosphorylation                                             | 1           | 1          | 0.00071 | 0.0085 | [DDR1]         |
| GO:0042407 | cristae formation                                                                 | 1           | 1          | 0.00071 | 0.0085 | [LETM1]        |
| GO:0046040 | IMP metabolic process                                                             | 1           | 1          | 0.00071 | 0.0085 | [HPRT1]        |
| GO:0043103 | hypoxanthine salvage                                                              | 1           | 1          | 0.00071 | 0.0085 | [HPRT1]        |
| GO:0061302 | smooth muscle cell-matrix adhesion                                                | 1           | 1          | 0.00071 | 0.0085 | [DDR1]         |
| GO:0046100 | hypoxanthine metabolic process                                                    | 1           | 1          | 0.00071 | 0.0085 | [HPRT1]        |
| GO:0014909 | smooth muscle cell migration                                                      | 2           | 1          | 0.00141 | 0.0069 | [DDR1]         |
| GO:0038063 | collagen-activated tyrosine kinase receptor signaling pathway                     | 2           | 1          | 0.00141 | 0.0069 | [DDR1]         |
| GO:0006178 | guanine salvage                                                                   | 2           | 1          | 0.00141 | 0.0069 | [HPRT1]        |
| GO:0046038 | GMP catabolic process                                                             | 2           | 1          | 0.00141 | 0.0069 | [HPRT1]        |
| GO:0006166 | purine ribonucleoside salvage                                                     | 2           | 1          | 0.00141 | 0.0069 | [HPRT1]        |
| GO:0010715 | regulation of extracellular matrix disassembly                                    | 3           | 1          | 0.00212 | 0.0079 | [DDR1]         |
| GO:2001240 | negative regulation of extrinsic apoptotic signaling pathway in absence of ligand | 3           | 1          | 0.00212 | 0.0079 | [MCL1]         |
| GO:0051716 | cellular response to stimulus                                                     | 5           | 1          | 0.00353 | 0.0109 | [EIF2B1]       |
| GO:0070059 | apoptosis in response to endoplasmic reticulum stress                             | 5           | 1          | 0.00353 | 0.0109 | [CHAC1]        |
| GO:0009062 | fatty acid catabolic process                                                      | 5           | 1          | 0.00353 | 0.0109 | [FAAH]         |
| GO:0040019 | positive regulation of embryonic development                                      | 5           | 1          | 0.00353 | 0.0109 | [RBM19]        |
| GO:0043434 | response to peptide hormone stimulus                                              | 6           | 1          | 0.00423 | 0.0114 | [EIF2B1]       |
| GO:0014003 | oligodendrocyte development                                                       | 7           | 1          | 0.00493 | 0.0127 | [EIF2B1]       |
| GO:0001709 | cell fate determination                                                           | 8           | 1          | 0.00564 | 0.0135 | [MCL1]         |
| GO:0019725 | cellular homeostasis                                                              | 8           | 1          | 0.00564 | 0.0135 | [MCL1]         |
| GO:0009749 | response to glucose stimulus                                                      | 9           | 1          | 0.00634 | 0.0143 | [EIF2B1]       |
| GO:0007610 | behavior                                                                          | 10          | 1          | 0.00704 | 0.0146 | [HPRT1]        |
| GO:0006783 | heme biosynthetic process                                                         | 10          | 1          | 0.00704 | 0.0146 | [SLC25A39]     |
| GO:0006957 | complement activation, alternative pathway                                        | 10          | 1          | 0.00704 | 0.0146 | [CFB]          |
| GO:0009408 | response to heat                                                                  | 11          | 1          | 0.00774 | 0.0149 | [EIF2B1]       |
| GO:0016568 | chromatin modification                                                            | 221         | 2          | 0.01066 | 0.0199 | [ASXL1, VPS72] |
| GO:0006164 | purine nucleotide biosynthetic process                                            | 16          | 1          | 0.01124 | 0.0202 | [HPRT1]        |

|                                                                                 |      |   |         |                              |
|---------------------------------------------------------------------------------|------|---|---------|------------------------------|
| GO:0051289 protein homotetramerization                                          | 25   | 1 | 0.01751 | 0.0305 [HPRT1]               |
| GO:0006413 translational initiation                                             | 26   | 1 | 0.01821 | 0.0303 [EIF2B1]              |
| GO:0030433 ER-associated protein catabolic process                              | 26   | 1 | 0.01821 | 0.0303 [DNAJB9]              |
| GO:0006986 response to unfolded protein                                         | 35   | 1 | 0.02444 | 0.0388 [CHAC1]               |
| GO:0006470 protein dephosphorylation                                            | 37   | 1 | 0.02582 | 0.0398 [PPM1M]               |
| GO:0051260 protein homooligomerization                                          | 43   | 1 | 0.02994 | 0.0449 [CRYAB]               |
| GO:0007229 integrin-mediated signaling pathway                                  | 57   | 1 | 0.0395  | 0.0576 [ITGA5]               |
| GO:0006457 protein folding                                                      | 68   | 1 | 0.04695 | 0.0667 [CWC27]               |
| GO:0006916 anti-apoptosis                                                       | 84   | 1 | 0.05768 | 0.0799 [MCL1]                |
| GO:0006355 regulation of transcription, DNA-dependent                           | 1254 | 3 | 0.05783 | 0.0781 [ASXL1, NCOR2, VPS72] |
| GO:0016042 lipid catabolic process                                              | 87   | 1 | 0.05968 | 0.0786 [ABHD4]               |
| GO:0008283 cell proliferation                                                   | 90   | 1 | 0.06167 | 0.0793 [GLUL]                |
| GO:0000398 nuclear mRNA splicing, via spliceosome                               | 98   | 1 | 0.06697 | 0.0841 [CWC27]               |
| GO:0001525 angiogenesis                                                         | 102  | 1 | 0.06961 | 0.0854 [SERPINE1]            |
| GO:0046777 protein autophosphorylation                                          | 107  | 1 | 0.0729  | 0.0875 [DDR1]                |
| GO:0000122 negative regulation of transcription from RNA polymerase II promoter | 117  | 1 | 0.07945 | 0.0933 [NCOR2]               |
| GO:0007275 multicellular organismal development                                 | 822  | 2 | 0.11419 | 0.1312 [MCL1, RBM19]         |
| GO:0044419 interspecies interaction between organisms                           | 315  | 1 | 0.20018 | 0.2252 [ITGA5]               |
| GO:0006915 apoptotic process                                                    | 321  | 1 | 0.20359 | 0.2244 [MCL1]                |
| GO:0006810 transport                                                            | 395  | 1 | 0.24449 | 0.264 [SLC25A39]             |
| GO:0007049 cell cycle                                                           | 405  | 1 | 0.24986 | 0.2646 [CDKN3]               |
| GO:0007155 cell adhesion                                                        | 420  | 1 | 0.25784 | 0.2678 [ITGA5]               |
| GO:0006508 proteolysis                                                          | 476  | 1 | 0.28692 | 0.2923 [CFB]                 |
| GO:0030154 cell differentiation                                                 | 484  | 1 | 0.29099 | 0.291 [MCL1]                 |

---

Table S13-6. GO annotation analysis of the module eigengene in 13 postnatal highly LT-specific modules (LT\_magenta).

| GO ID      | GO Name                                                                                   | Total Count | Diff Count | P Value | FDR    | Gene                         |
|------------|-------------------------------------------------------------------------------------------|-------------|------------|---------|--------|------------------------------|
| GO:0030154 | cell differentiation                                                                      | 484         | 4          | 0.00065 | 0.0338 | [MGP, MLF1, PAFAH1B1, STMN1] |
| GO:0032261 | purine nucleotide salvage                                                                 | 1           | 1          | 0.00082 | 0.0095 | [ADA]                        |
| GO:0046103 | inosine biosynthetic process                                                              | 1           | 1          | 0.00082 | 0.0095 | [ADA]                        |
| GO:0060169 | negative regulation of adenosine receptor signaling pathway                               | 1           | 1          | 0.00082 | 0.0095 | [ADA]                        |
| GO:0034198 | cellular response to amino acid starvation                                                | 1           | 1          | 0.00082 | 0.0095 | [DAP]                        |
| GO:0070072 | vacuolar proton-transporting V-type ATPase complex assembly                               | 1           | 1          | 0.00082 | 0.0095 | [VMA21]                      |
| GO:0006517 | protein deglycosylation                                                                   | 1           | 1          | 0.00082 | 0.0095 | [AGA]                        |
| GO:0006154 | adenosine catabolic process                                                               | 2           | 1          | 0.00164 | 0.01   | [ADA]                        |
| GO:0002318 | myeloid progenitor cell differentiation                                                   | 2           | 1          | 0.00164 | 0.01   | [MLF1]                       |
| GO:0033632 | regulation of cell-cell adhesion mediated by integrin                                     | 3           | 1          | 0.00246 | 0.0128 | [ADA]                        |
| GO:0009303 | rRNA transcription                                                                        | 4           | 1          | 0.00328 | 0.0148 | [RNASEK]                     |
| GO:0031023 | microtubule organizing center organization                                                | 4           | 1          | 0.00328 | 0.0148 | [PAFAH1B1]                   |
| GO:0006950 | response to stress                                                                        | 104         | 2          | 0.00332 | 0.0133 | [AKR1B1, HSPB11]             |
| GO:0010507 | negative regulation of autophagy                                                          | 5           | 1          | 0.00409 | 0.0152 | [DAP]                        |
| GO:0007275 | multicellular organismal development                                                      | 822         | 4          | 0.00447 | 0.0155 | [MGP, MLF1, PAFAH1B1, STMN1] |
| GO:0006744 | ubiquinone biosynthetic process                                                           | 6           | 1          | 0.00491 | 0.0155 | [COQ9]                       |
| GO:0006200 | ATP catabolic process                                                                     | 6           | 1          | 0.00491 | 0.0155 | [ATP5O]                      |
| GO:0007017 | microtubule-based process                                                                 | 7           | 1          | 0.00573 | 0.0165 | [PAFAH1B1]                   |
| GO:0006754 | ATP biosynthetic process                                                                  | 8           | 1          | 0.00654 | 0.0174 | [ATP5O]                      |
| GO:0008624 | induction of apoptosis by extracellular signals                                           | 8           | 1          | 0.00654 | 0.0174 | [DAP]                        |
| GO:0000132 | establishment of mitotic spindle orientation                                              | 9           | 1          | 0.00736 | 0.0178 | [PAFAH1B1]                   |
| GO:0016999 | antibiotic metabolic process                                                              | 9           | 1          | 0.00736 | 0.0178 | [AKR1B1]                     |
| GO:0042776 | mitochondrial ATP synthesis coupled proton transport                                      | 14          | 1          | 0.01142 | 0.0258 | [ATP5O]                      |
| GO:0007399 | nervous system development                                                                | 214         | 2          | 0.01337 | 0.029  | [PAFAH1B1, STMN1]            |
| GO:0002504 | antigen processing and presentation of peptide or polysaccharide antigen via MHC class II | 17          | 1          | 0.01386 | 0.0288 | [HLA-DQA1]                   |
| GO:0001764 | neuron migration                                                                          | 22          | 1          | 0.0179  | 0.0358 | [PAFAH1B1]                   |
| GO:0032088 | negative regulation of NF-kappaB transcription factor activity                            | 23          | 1          | 0.0187  | 0.0354 | [DAP]                        |
| GO:0009117 | nucleotide metabolic process                                                              | 23          | 1          | 0.0187  | 0.0354 | [ADA]                        |
| GO:0015992 | proton transport                                                                          | 28          | 1          | 0.02272 | 0.0407 | [ATP5O]                      |

|                                                                                             |     |   |         |                         |
|---------------------------------------------------------------------------------------------|-----|---|---------|-------------------------|
| GO:0042110 T cell activation                                                                | 32  | 1 | 0.02593 | 0.0435 [ADA]            |
| GO:0001666 response to hypoxia                                                              | 32  | 1 | 0.02593 | 0.0435 [ADA]            |
| GO:0006919 activation of cysteine-type endopeptidase activity involved in apoptotic process | 32  | 1 | 0.02593 | 0.0435 [DAP]            |
| GO:0006351 transcription, DNA-dependent                                                     | 48  | 1 | 0.03864 | 0.0609 [MLF1]           |
| GO:0006631 fatty acid metabolic process                                                     | 50  | 1 | 0.04022 | 0.0615 [ACADS]          |
| GO:0007050 cell cycle arrest                                                                | 52  | 1 | 0.0418  | 0.0621 [MLF1]           |
| GO:0007049 cell cycle                                                                       | 405 | 2 | 0.04355 | 0.0629 [MLF1, PAFAH1B1] |
| GO:0006935 chemotaxis                                                                       | 71  | 1 | 0.05664 | 0.0796 [CMTM3]          |
| GO:0006916 anti-apoptosis                                                                   | 84  | 1 | 0.06667 | 0.0912 [ANXA4]          |
| GO:0016042 lipid catabolic process                                                          | 87  | 1 | 0.06897 | 0.092 [PAFAH1B1]        |
| GO:0016192 vesicle-mediated transport                                                       | 104 | 1 | 0.08189 | 0.1065 [SAR1B]          |
| GO:0009615 response to virus                                                                | 114 | 1 | 0.08941 | 0.1134 [STMN1]          |
| GO:0006412 translation                                                                      | 130 | 1 | 0.10132 | 0.1254 [MRPL52]         |
| GO:0007165 signal transduction                                                              | 141 | 1 | 0.10942 | 0.1323 [ANXA4]          |
| GO:0007067 mitosis                                                                          | 159 | 1 | 0.12253 | 0.1448 [PAFAH1B1]       |
| GO:0006955 immune response                                                                  | 220 | 1 | 0.16555 | 0.1913 [HLA-DQA1]       |
| GO:0045892 negative regulation of transcription, DNA-dependent                              | 284 | 1 | 0.20848 | 0.2357 [DAP]            |
| GO:0051301 cell division                                                                    | 285 | 1 | 0.20913 | 0.2314 [PAFAH1B1]       |
| GO:0015031 protein transport                                                                | 383 | 1 | 0.27069 | 0.2933 [RAB13]          |
| GO:0006810 transport                                                                        | 395 | 1 | 0.2779  | 0.2949 [PAFAH1B1]       |
| GO:0007155 cell adhesion                                                                    | 420 | 1 | 0.2927  | 0.3044 [ADA]            |
| GO:0006811 ion transport                                                                    | 455 | 1 | 0.31293 | 0.3191 [ATP5O]          |
| GO:0006508 proteolysis                                                                      | 476 | 1 | 0.32479 | 0.3248 [TMPRSS11F]      |

---

Table S13-7. GO annotation analysis of the module eigengene in 13 postnatal highly LT-specific modules (LT\_orange).

| GO ID      | GO Name                                                                 | Total Count | Diff Count | P Value    | FDR        | Gene           |
|------------|-------------------------------------------------------------------------|-------------|------------|------------|------------|----------------|
| GO:0031111 | negative regulation of microtubule polymerization or depolymerization   | 2           | 1          | 0.00109338 | 0.02332547 | [CLASP1]       |
| GO:0000715 | nucleotide-excision repair, DNA damage recognition                      | 2           | 1          | 0.00109338 | 0.02332547 | [RAD23B]       |
| GO:0032434 | regulation of proteasomal ubiquitin-dependent protein catabolic process | 4           | 1          | 0.00218562 | 0.01748494 | [RAD23B]       |
| GO:0031023 | microtubule organizing center organization                              | 4           | 1          | 0.00218562 | 0.01748494 | [CLASP1]       |
| GO:0010458 | exit from mitosis                                                       | 4           | 1          | 0.00218562 | 0.01748494 | [CLASP1]       |
| GO:0034453 | microtubule anchoring                                                   | 5           | 1          | 0.00273131 | 0.01456697 | [CLASP1]       |
| GO:0034097 | response to cytokine stimulus                                           | 6           | 1          | 0.00327671 | 0.01497924 | [DDOST]        |
| GO:0007163 | establishment or maintenance of cell polarity                           | 8           | 1          | 0.00436666 | 0.01746663 | [CLASP1]       |
| GO:0042273 | ribosomal large subunit biogenesis                                      | 10          | 1          | 0.00545546 | 0.01745748 | [C7orf30]      |
| GO:0007020 | microtubule nucleation                                                  | 10          | 1          | 0.00545546 | 0.01745748 | [CLASP1]       |
| GO:0007026 | negative regulation of microtubule depolymerization                     | 10          | 1          | 0.00545546 | 0.01745748 | [CLASP1]       |
| GO:0001578 | microtubule bundle formation                                            | 12          | 1          | 0.00654313 | 0.01550963 | [CLASP1]       |
| GO:0030518 | intracellular steroid hormone receptor signaling pathway                | 12          | 1          | 0.00654313 | 0.01550963 | [MED24]        |
| GO:0000226 | microtubule cytoskeleton organization                                   | 12          | 1          | 0.00654313 | 0.01550963 | [CLASP1]       |
| GO:0006487 | protein N-linked glycosylation                                          | 12          | 1          | 0.00654313 | 0.01550963 | [DDOST]        |
| GO:0006289 | nucleotide-excision repair                                              | 16          | 1          | 0.00871504 | 0.01743007 | [RAD23B]       |
| GO:0006486 | protein glycosylation                                                   | 17          | 1          | 0.0092573  | 0.01742551 | [DDOST]        |
| GO:0006367 | transcription initiation from RNA polymerase II promoter                | 23          | 1          | 0.01250493 | 0.02223099 | [MED24]        |
| GO:0090090 | negative regulation of canonical Wnt receptor signaling pathway         | 27          | 1          | 0.01466435 | 0.02469785 | [AES]          |
| GO:0015992 | proton transport                                                        | 28          | 1          | 0.0152035  | 0.0243256  | [ATP6AP1]      |
| GO:0042110 | T cell activation                                                       | 32          | 1          | 0.01735726 | 0.02644916 | [DDOST]        |
| GO:0030521 | androgen receptor signaling pathway                                     | 38          | 1          | 0.02057944 | 0.02993373 | [MED24]        |
| GO:0007243 | intracellular protein kinase cascade                                    | 45          | 1          | 0.02432585 | 0.03384466 | [OXSR1]        |
| GO:0016055 | Wnt receptor signaling pathway                                          | 87          | 1          | 0.04651756 | 0.06202342 | [AES]          |
| GO:0006412 | translation                                                             | 130         | 1          | 0.06873612 | 0.08798224 | [AARSD1]       |
| GO:0006468 | protein phosphorylation                                                 | 185         | 1          | 0.09643275 | 0.11868647 | [OXSR1]        |
| GO:0045892 | negative regulation of transcription, DNA-dependent                     | 284         | 1          | 0.14430946 | 0.17103344 | [AES]          |
| GO:0051301 | cell division                                                           | 285         | 1          | 0.14478043 | 0.16546335 | [CLASP1]       |
| GO:0006355 | regulation of transcription, DNA-dependent                              | 1254        | 2          | 0.14920705 | 0.16464226 | [MED24, PNRC1] |
| GO:0045893 | positive regulation of transcription, DNA-dependent                     | 334         | 1          | 0.167556   | 0.1787264  | [MED24]        |
| GO:0006811 | ion transport                                                           | 455         | 1          | 0.22133479 | 0.22847462 | [ATP6AP1]      |
| GO:0008150 | biological_process                                                      | 588         | 1          | 0.27660305 | 0.27660305 | [TMEM100]      |



Table S13-8. GO annotation analysis of the module eigengene in 13 postnatal highly LT-specific modules (LT\_red).

| GO ID      | GO Name                                                       | Total Dm |     | P Value | FDR  | Gene                                          |
|------------|---------------------------------------------------------------|----------|-----|---------|------|-----------------------------------------------|
|            |                                                               | Coun     | Cou |         |      |                                               |
| GO:0006810 | transport                                                     | 395      | 6   | 2E-05   | 0    | [ETFB, NDUFC2, NDUFS8, NDUFV1, UCP3, UQCRFS1] |
| GO:0006120 | mitochondrial electron transport, NADH to ubiquinone          | 42       | 3   | 3E-05   | 0    | [NDUFC2, NDUFS8, NDUFV1]                      |
| GO:0051289 | protein homotetramerization                                   | 25       | 2   | 0.0006  | 0.02 | [ACOT13, ATPIF1]                              |
| GO:0015992 | proton transport                                              | 28       | 2   | 0.0007  | 0.02 | [ATP5B, ATP6V1E1]                             |
| GO:0048593 | camera-type eye morphogenesis                                 | 1        | 1   | 0.0014  | 0.02 | [IFT122]                                      |
| GO:0051346 | negative regulation of hydrolase activity                     | 1        | 1   | 0.0014  | 0.02 | [ATPIF1]                                      |
| GO:0033306 | phytol metabolic process                                      | 1        | 1   | 0.0014  | 0.02 | [PECR]                                        |
| GO:0034969 | histone arginine methylation                                  | 1        | 1   | 0.0014  | 0.02 | [PRMT7]                                       |
| GO:0009308 | amine metabolic process                                       | 1        | 1   | 0.0014  | 0.02 | [AOC3]                                        |
| GO:0051453 | regulation of intracellular pH                                | 1        | 1   | 0.0014  | 0.02 | [ATP5B]                                       |
| GO:0035050 | embryonic heart tube development                              | 1        | 1   | 0.0014  | 0.02 | [IFT122]                                      |
| GO:0060998 | regulation of dendritic spine development                     | 2        | 1   | 0.0029  | 0.02 | [ARF6]                                        |
| GO:0045650 | negative regulation of macrophage differentiation             | 2        | 1   | 0.0029  | 0.02 | [INHA]                                        |
| GO:0035020 | regulation of Rac protein signal transduction                 | 2        | 1   | 0.0029  | 0.02 | [ARF6]                                        |
| GO:0048261 | negative regulation of receptor-mediated endocytosis          | 2        | 1   | 0.0029  | 0.02 | [ARF6]                                        |
| GO:0015810 | aspartate transport                                           | 2        | 1   | 0.0029  | 0.02 | [SLC25A12]                                    |
| GO:0043490 | malate-aspartate shuttle                                      | 2        | 1   | 0.0029  | 0.02 | [SLC25A12]                                    |
| GO:0010172 | embryonic body morphogenesis                                  | 2        | 1   | 0.0029  | 0.02 | [IFT122]                                      |
| GO:0055114 | oxidation-reduction process                                   | 65       | 2   | 0.004   | 0.02 | [PECR, UQCRFS1]                               |
| GO:0045077 | negative regulation of interferon-gamma biosynthetic process  | 3        | 1   | 0.0043  | 0.02 | [INHA]                                        |
| GO:0046881 | positive regulation of follicle-stimulating hormone secretion | 3        | 1   | 0.0043  | 0.02 | [INHA]                                        |
| GO:0042541 | hemoglobin biosynthetic process                               | 3        | 1   | 0.0043  | 0.02 | [INHA]                                        |
| GO:0070681 | glutamyl-tRNA <sup>Gln</sup> biosynthesis via transamidation  | 3        | 1   | 0.0043  | 0.02 | [GATC]                                        |
| GO:0045578 | negative regulation of B cell differentiation                 | 3        | 1   | 0.0043  | 0.02 | [INHA]                                        |
| GO:0006533 | aspartate catabolic process                                   | 3        | 1   | 0.0043  | 0.02 | [DDO]                                         |
| GO:0046882 | negative regulation of follicle-stimulating hormone secretion | 4        | 1   | 0.0057  | 0.02 | [INHA]                                        |
| GO:0043043 | peptide biosynthetic process                                  | 4        | 1   | 0.0057  | 0.02 | [MRPS35]                                      |
| GO:0018216 | peptidyl-arginine methylation                                 | 4        | 1   | 0.0057  | 0.02 | [PRMT7]                                       |
| GO:0006572 | tyrosine catabolic process                                    | 5        | 1   | 0.0072  | 0.02 | [GSTZ1]                                       |
| GO:0045109 | intermediate filament organization                            | 5        | 1   | 0.0072  | 0.02 | [DNAJB6]                                      |
| GO:0015813 | L-glutamate transport                                         | 5        | 1   | 0.0072  | 0.02 | [SLC25A12]                                    |
| GO:0006895 | Golgi to endosome transport                                   | 5        | 1   | 0.0072  | 0.02 | [RAB14]                                       |

|            |                                                          |     |   |        |      |                      |
|------------|----------------------------------------------------------|-----|---|--------|------|----------------------|
| GO:0032543 | mitochondrial translation                                | 5   | 1 | 0.0072 | 0.02 | [GATC]               |
| GO:0051489 | regulation of filopodium assembly                        | 6   | 1 | 0.0086 | 0.02 | [ARF6]               |
| GO:0046907 | intracellular transport                                  | 6   | 1 | 0.0086 | 0.02 | [RAB14]              |
| GO:0009605 | response to external stimulus                            | 6   | 1 | 0.0086 | 0.02 | [INHA]               |
| GO:0060173 | limb development                                         | 6   | 1 | 0.0086 | 0.02 | [IFT122]             |
| GO:0007269 | neurotransmitter secretion                               | 6   | 1 | 0.0086 | 0.02 | [RAB14]              |
| GO:0006349 | regulation of gene expression by genetic imprinting      | 6   | 1 | 0.0086 | 0.02 | [PRMT7]              |
| GO:0001525 | angiogenesis                                             | 102 | 2 | 0.0095 | 0.02 | [ATP5B, ATP1F1]      |
| GO:0016192 | vesicle-mediated transport                               | 104 | 2 | 0.0099 | 0.03 | [ARF6, RAB14]        |
| GO:0031529 | ruffle organization                                      | 7   | 1 | 0.01   | 0.02 | [ARF6]               |
| GO:0042326 | negative regulation of phosphorylation                   | 7   | 1 | 0.01   | 0.02 | [INHA]               |
| GO:0000387 | spliceosomal snRNP assembly                              | 7   | 1 | 0.01   | 0.02 | [PRMT7]              |
| GO:0042769 | DNA damage response, detection of DNA damage             | 7   | 1 | 0.01   | 0.02 | [MRPS35]             |
| GO:0030866 | cortical actin cytoskeleton organization                 | 7   | 1 | 0.01   | 0.02 | [ARF6]               |
| GO:0006091 | generation of precursor metabolites and energy           | 8   | 1 | 0.0114 | 0.03 | [ATP5B]              |
| GO:0006754 | ATP biosynthetic process                                 | 8   | 1 | 0.0114 | 0.03 | [ATP5B]              |
| GO:0001937 | negative regulation of endothelial cell proliferation    | 9   | 1 | 0.0128 | 0.03 | [ATPIF1]             |
| GO:0051592 | response to calcium ion                                  | 10  | 1 | 0.0143 | 0.03 | [SLC25A12]           |
| GO:0001541 | ovarian follicle development                             | 10  | 1 | 0.0143 | 0.03 | [INHA]               |
| GO:0006412 | translation                                              | 130 | 2 | 0.0151 | 0.03 | [MRPS36, RPL36]      |
| GO:0046677 | response to antibiotic                                   | 11  | 1 | 0.0157 | 0.03 | [AOC3]               |
| GO:0000045 | autophagic vacuole assembly                              | 11  | 1 | 0.0157 | 0.03 | [MAP1LC3A]           |
| GO:0030838 | positive regulation of actin filament polymerization     | 11  | 1 | 0.0157 | 0.03 | [ARF6]               |
| GO:0008543 | fibroblast growth factor receptor signaling pathway      | 11  | 1 | 0.0157 | 0.03 | [RAB14]              |
| GO:0043046 | DNA methylation involved in gamete generation            | 11  | 1 | 0.0157 | 0.03 | [PRMT7]              |
| GO:0032981 | mitochondrial respiratory chain complex I assembly       | 11  | 1 | 0.0157 | 0.03 | [NDUFS8]             |
| GO:0006446 | regulation of translational initiation                   | 13  | 1 | 0.0185 | 0.03 | [EIF1B]              |
| GO:0030218 | erythrocyte differentiation                              | 13  | 1 | 0.0185 | 0.03 | [INHA]               |
| GO:0006352 | transcription initiation, DNA-dependent                  | 13  | 1 | 0.0185 | 0.03 | [TAF5]               |
| GO:0042776 | mitochondrial ATP synthesis coupled proton transport     | 14  | 1 | 0.0199 | 0.03 | [ATP5B]              |
| GO:0001843 | neural tube closure                                      | 14  | 1 | 0.0199 | 0.03 | [IFT122]             |
| GO:0007155 | cell adhesion                                            | 420 | 3 | 0.0226 | 0.04 | [AOC3, ARF6, FERMT2] |
| GO:0007264 | small GTPase mediated signal transduction                | 16  | 1 | 0.0227 | 0.04 | [RAB14]              |
| GO:0006898 | receptor-mediated endocytosis                            | 18  | 1 | 0.0255 | 0.04 | [PICALM]             |
| GO:0006367 | transcription initiation from RNA polymerase II promoter | 23  | 1 | 0.0325 | 0.05 | [TAF5]               |
| GO:0030154 | cell differentiation                                     | 484 | 3 | 0.0325 | 0.05 | [ARF6, INHA, PRMT7]  |
| GO:0045786 | negative regulation of cell cycle                        | 24  | 1 | 0.0339 | 0.05 | [INHA]               |

|            |                                                                                           |      |   |        |      |                   |
|------------|-------------------------------------------------------------------------------------------|------|---|--------|------|-------------------|
| GO:0006749 | glutathione metabolic process                                                             | 25   | 1 | 0.0353 | 0.05 | [GSTZ1]           |
| GO:0043154 | negative regulation of cysteine-type endopeptidase activity involved in apoptotic process | 25   | 1 | 0.0353 | 0.05 | [DNAJB6]          |
| GO:0007399 | nervous system development                                                                | 214  | 2 | 0.038  | 0.05 | [ARF6, INHA]      |
| GO:0060271 | cilium morphogenesis                                                                      | 28   | 1 | 0.0394 | 0.06 | [IFT122]          |
| GO:0016568 | chromatin modification                                                                    | 221  | 2 | 0.0403 | 0.06 | [PRMT7, TAF5]     |
| GO:0009790 | embryo development                                                                        | 31   | 1 | 0.0436 | 0.06 | [RAB14]           |
| GO:0006928 | cellular component movement                                                               | 31   | 1 | 0.0436 | 0.06 | [ARF6]            |
| GO:0007166 | cell surface receptor signaling pathway                                                   | 32   | 1 | 0.0449 | 0.06 | [INHA]            |
| GO:0006986 | response to unfolded protein                                                              | 35   | 1 | 0.0491 | 0.07 | [DNAJB6]          |
| GO:0006914 | autophagy                                                                                 | 36   | 1 | 0.0504 | 0.07 | [MAP1LC3A]        |
| GO:0006096 | glycolysis                                                                                | 37   | 1 | 0.0518 | 0.07 | [LDHB]            |
| GO:0006979 | response to oxidative stress                                                              | 40   | 1 | 0.0559 | 0.07 | [NDUFS8]          |
| GO:0022900 | electron transport chain                                                                  | 41   | 1 | 0.0572 | 0.07 | [NDUFC2]          |
| GO:0006633 | fatty acid biosynthetic process                                                           | 42   | 1 | 0.0586 | 0.07 | [PECR]            |
| GO:0007267 | cell-cell signaling                                                                       | 42   | 1 | 0.0586 | 0.07 | [INHA]            |
| GO:0030036 | actin cytoskeleton organization                                                           | 43   | 1 | 0.0599 | 0.07 | [FERMT2]          |
| GO:0051260 | protein homooligomerization                                                               | 43   | 1 | 0.0599 | 0.07 | [ATPIF1]          |
| GO:0006631 | fatty acid metabolic process                                                              | 50   | 1 | 0.0693 | 0.08 | [HADHB]           |
| GO:0007050 | cell cycle arrest                                                                         | 52   | 1 | 0.072  | 0.09 | [INHA]            |
| GO:0006915 | apoptotic process                                                                         | 321  | 2 | 0.0779 | 0.09 | [LUC7L3, UBE2Z]   |
| GO:0030030 | cell projection organization                                                              | 60   | 1 | 0.0826 | 0.1  | [IFT122]          |
| GO:0008360 | regulation of cell shape                                                                  | 67   | 1 | 0.0918 | 0.1  | [FERMT2]          |
| GO:0006457 | protein folding                                                                           | 68   | 1 | 0.0931 | 0.11 | [DNAJB6]          |
| GO:0015031 | protein transport                                                                         | 383  | 2 | 0.1049 | 0.12 | [ARF6, RAB14]     |
| GO:0006917 | induction of apoptosis                                                                    | 79   | 1 | 0.1074 | 0.12 | [INHA]            |
| GO:0006950 | response to stress                                                                        | 104  | 1 | 0.1389 | 0.15 | [LUC7L3]          |
| GO:0006811 | ion transport                                                                             | 455  | 2 | 0.139  | 0.15 | [ATP5B, ATP6V1E1] |
| GO:0006508 | proteolysis                                                                               | 476  | 2 | 0.1493 | 0.16 | [CASP7, LAP3]     |
| GO:0006954 | inflammatory response                                                                     | 128  | 1 | 0.1682 | 0.18 | [AOC3]            |
| GO:0006397 | mRNA processing                                                                           | 144  | 1 | 0.1871 | 0.2  | [LUC7L3]          |
| GO:0008380 | RNA splicing                                                                              | 150  | 1 | 0.1941 | 0.2  | [LUC7L3]          |
| GO:0007275 | multicellular organismal development                                                      | 822  | 2 | 0.3308 | 0.34 | [IFRD1, IFT122]   |
| GO:0051301 | cell division                                                                             | 285  | 1 | 0.3368 | 0.34 | [KLHL22]          |
| GO:0044419 | interspecies interaction between organisms                                                | 315  | 1 | 0.365  | 0.37 | [TAF5]            |
| GO:0006355 | regulation of transcription, DNA-dependent                                                | 1254 | 1 | 1      | 1    | [PRMT7]           |

Table S13-9. GO annotation analysis of the module eigengene in 13 postnatal highly LT-specific modules (LT\_sienna3).

| GO ID      | GO Name                                                  | Total Count | Diff Count | P Value   | FDR       | Gene                    |
|------------|----------------------------------------------------------|-------------|------------|-----------|-----------|-------------------------|
| GO:0044419 | interspecies interaction between organisms               | 315         | 3          | 0.0002311 | 0.0043911 | [C1QBP, PSMA4, SLC25A6] |
| GO:0000046 | autophagic vacuole fusion                                | 2           | 1          | 0.0007745 | 0.0073581 | [WIPI2]                 |
| GO:0046653 | tetrahydrofolate metabolic process                       | 4           | 1          | 0.0015485 | 0.0098073 | [MTHFD2]                |
| GO:0006777 | Mo-molybdopterin cofactor biosynthetic process           | 6           | 1          | 0.0023219 | 0.0110292 | [GPHN]                  |
| GO:0032981 | mitochondrial respiratory chain complex I assembly       | 11          | 1          | 0.004253  | 0.0146921 | [C20orf7]               |
| GO:0000045 | autophagic vacuole assembly                              | 11          | 1          | 0.004253  | 0.0146921 | [WIPI2]                 |
| GO:0030518 | intracellular steroid hormone receptor signaling pathway | 12          | 1          | 0.0046388 | 0.012591  | [MED30]                 |
| GO:0006730 | one-carbon metabolic process                             | 13          | 1          | 0.0050244 | 0.011933  | [MTHFD2]                |
| GO:0006367 | transcription initiation from RNA polymerase II promoter | 23          | 1          | 0.0088732 | 0.0187323 | [MED30]                 |
| GO:0008203 | cholesterol metabolic process                            | 24          | 1          | 0.0092573 | 0.0175889 | [HDLBP]                 |
| GO:0006914 | autophagy                                                | 36          | 1          | 0.0138556 | 0.0228919 | [WIPI2]                 |
| GO:0008202 | steroid metabolic process                                | 36          | 1          | 0.0138556 | 0.0228919 | [HDLBP]                 |
| GO:0030521 | androgen receptor signaling pathway                      | 38          | 1          | 0.0146201 | 0.0213678 | [MED30]                 |
| GO:0006869 | lipid transport                                          | 46          | 1          | 0.0176723 | 0.0239838 | [HDLBP]                 |
| GO:0006457 | protein folding                                          | 68          | 1          | 0.0260199 | 0.0329585 | [FKBP5]                 |
| GO:0006915 | apoptotic process                                        | 321         | 1          | 0.1173408 | 0.1393422 | [SLC25A6]               |
| GO:0045893 | positive regulation of transcription, DNA-dependent      | 334         | 1          | 0.1218083 | 0.1361387 | [MED30]                 |
| GO:0006810 | transport                                                | 395         | 1          | 0.1424883 | 0.1504043 | [HDLBP]                 |
| GO:0006355 | regulation of transcription, DNA-dependent               | 1254        | 1          | 0.389142  | 0.389142  | [HNRNPUL1]              |

Table S13-10. GO annotation analysis of the module eigengene in 13 postnatal highly LT-specific modules (LT\_skyblue).

| GO ID      | GO Name                                                                          | Total Count | Diff Count | P Value  | FDR    | Gene             |
|------------|----------------------------------------------------------------------------------|-------------|------------|----------|--------|------------------|
| GO:0006892 | post-Golgi vesicle-mediated transport                                            | 1           | 1          | 0.000547 | 0.0109 | [SCFD1]          |
| GO:0031056 | regulation of histone modification                                               | 1           | 1          | 0.000547 | 0.0109 | [CDK9]           |
| GO:0043111 | replication fork arrest                                                          | 1           | 1          | 0.000547 | 0.0109 | [CDK9]           |
| GO:0006282 | regulation of DNA repair                                                         | 2           | 1          | 0.001093 | 0.0109 | [CDK9]           |
| GO:0060628 | regulation of ER to Golgi vesicle-mediated transport                             | 3           | 1          | 0.00164  | 0.0131 | [SCFD1]          |
| GO:0071157 | negative regulation of cell cycle arrest                                         | 5           | 1          | 0.002731 | 0.0137 | [CDK9]           |
| GO:0043149 | stress fiber assembly                                                            | 5           | 1          | 0.002731 | 0.0137 | [SORBS1]         |
| GO:0051403 | stress-activated MAPK cascade                                                    | 5           | 1          | 0.002731 | 0.0137 | [CCM2]           |
| GO:0071345 | cellular response to cytokine stimulus                                           | 5           | 1          | 0.002731 | 0.0137 | [CDK9]           |
| GO:0034612 | response to tumor necrosis factor                                                | 5           | 1          | 0.002731 | 0.0137 | [NUB1]           |
| GO:0015758 | glucose transport                                                                | 7           | 1          | 0.003822 | 0.0133 | [SORBS1]         |
| GO:0034341 | response to interferon-gamma                                                     | 7           | 1          | 0.003822 | 0.0133 | [NUB1]           |
| GO:0035176 | social behavior                                                                  | 8           | 1          | 0.004367 | 0.0134 | [ANXA7]          |
| GO:0035329 | hippo signaling cascade                                                          | 11          | 1          | 0.005999 | 0.0171 | [TEAD4]          |
| GO:0032436 | positive regulation of proteasomal ubiquitin-dependent protein catabolic process | 12          | 1          | 0.006543 | 0.0169 | [NUB1]           |
| GO:0048041 | focal adhesion assembly                                                          | 12          | 1          | 0.006543 | 0.0169 | [SORBS1]         |
| GO:0008286 | insulin receptor signaling pathway                                               | 13          | 1          | 0.007087 | 0.0167 | [SORBS1]         |
| GO:0006890 | retrograde vesicle-mediated transport, Golgi to ER                               | 14          | 1          | 0.00763  | 0.0165 | [SCFD1]          |
| GO:0001570 | vasculogenesis                                                                   | 14          | 1          | 0.00763  | 0.0165 | [CCM2]           |
| GO:0009636 | response to toxin                                                                | 17          | 1          | 0.009257 | 0.0185 | [SCFD1]          |
| GO:0070979 | protein K11-linked ubiquitination                                                | 26          | 1          | 0.014125 | 0.0269 | [ANAPC7]         |
| GO:0015031 | protein transport                                                                | 383         | 2          | 0.018468 | 0.0336 | [DNAJC14, SCFD1] |
| GO:0006986 | response to unfolded protein                                                     | 35          | 1          | 0.01897  | 0.033  | [UBXN4]          |
| GO:0007517 | muscle organ development                                                         | 38          | 1          | 0.020579 | 0.0343 | [MYF6]           |
| GO:0006511 | ubiquitin-dependent protein catabolic process                                    | 40          | 1          | 0.021651 | 0.0346 | [NUB1]           |
| GO:0040008 | regulation of growth                                                             | 51          | 1          | 0.027526 | 0.0423 | [MCTS1]          |
| GO:0007229 | integrin-mediated signaling pathway                                              | 57          | 1          | 0.030716 | 0.0455 | [CCM2]           |
| GO:0006974 | response to DNA damage stimulus                                                  | 93          | 1          | 0.049648 | 0.0709 | [MCTS1]          |
| GO:0016567 | protein ubiquitination                                                           | 99          | 1          | 0.052769 | 0.0728 | [NUB1]           |
| GO:0016192 | vesicle-mediated transport                                                       | 104         | 1          | 0.055362 | 0.0738 | [SCFD1]          |

|            |                                            |      |   |          |        |               |
|------------|--------------------------------------------|------|---|----------|--------|---------------|
| GO:0006412 | translation                                | 130  | 1 | 0.068736 | 0.0887 | [MRPL45]      |
| GO:0008219 | cell death                                 | 136  | 1 | 0.071797 | 0.0897 | [FOLR1]       |
| GO:0007275 | multicellular organismal development       | 822  | 2 | 0.073734 | 0.0894 | [CCM2, MYF6]  |
| GO:0007165 | signal transduction                        | 141  | 1 | 0.07434  | 0.0875 | [S100A11]     |
| GO:0007067 | mitosis                                    | 159  | 1 | 0.08344  | 0.0954 | [ANAPC7]      |
| GO:0051301 | cell division                              | 285  | 1 | 0.14478  | 0.1609 | [ANAPC7]      |
| GO:0006355 | regulation of transcription, DNA-dependent | 1254 | 2 | 0.149207 | 0.1613 | [CDK9, MCTS1] |
| GO:0006810 | transport                                  | 395  | 1 | 0.195098 | 0.2054 | [SORBS1]      |
| GO:0007049 | cell cycle                                 | 405  | 1 | 0.199529 | 0.2046 | [MCTS1]       |
| GO:0006508 | proteolysis                                | 476  | 1 | 0.230323 | 0.2303 | [PLAU]        |

---

Table S13-11. GO annotation analysis of the module eigengene in 13 postnatal highly LT-specific modules (LT\_tan).

| GO ID      | GO Name                                                                                   | Total Count | Diff Count | P Value | FDR     | Gene                    |
|------------|-------------------------------------------------------------------------------------------|-------------|------------|---------|---------|-------------------------|
| GO:0032436 | positive regulation of proteasomal ubiquitin-dependent protein catabolic process          | 12          | 2          | 8.7E-05 | 0.00642 | [CSNK1E, USP5]          |
| GO:0006461 | protein complex assembly                                                                  | 33          | 2          | 0.00068 | 0.02527 | [HMGA1, PPP2R1A]        |
| GO:0008380 | RNA splicing                                                                              | 150         | 3          | 0.00072 | 0.01782 | [CWC15, PPP2R1A, PRPF8] |
| GO:0016189 | synaptic vesicle to endosome fusion                                                       | 1           | 1          | 0.00116 | 0.0215  | [EEA1]                  |
| GO:0040008 | regulation of growth                                                                      | 51          | 2          | 0.00163 | 0.02409 | [PPP2R1A, RUVBL1]       |
| GO:0031936 | negative regulation of chromatin silencing                                                | 2           | 1          | 0.00232 | 0.02455 | [HMGA1]                 |
| GO:0090402 | oncogene-induced senescence                                                               | 2           | 1          | 0.00232 | 0.02455 | [HMGA1]                 |
| GO:0000466 | maturation of 5.8S rRNA from tricistronic rRNA transcript (SSU-rRNA, 5.8S rRNA, LSU-rRNA) | 2           | 1          | 0.00232 | 0.02455 | [PES1]                  |
| GO:0006457 | protein folding                                                                           | 68          | 2          | 0.00287 | 0.02361 | [PFDN2, PFDN4]          |
| GO:0035986 | senescence-associated heterochromatin focus assembly                                      | 3           | 1          | 0.00348 | 0.01982 | [HMGA1]                 |
| GO:0006906 | vesicle fusion                                                                            | 3           | 1          | 0.00348 | 0.01982 | [EEA1]                  |
| GO:0006337 | nucleosome disassembly                                                                    | 3           | 1          | 0.00348 | 0.01982 | [HMGA1]                 |
| GO:0000463 | maturation of LSU-rRNA from tricistronic rRNA transcript (SSU-rRNA, 5.8S rRNA, LSU-rRNA)  | 3           | 1          | 0.00348 | 0.01982 | [PES1]                  |
| GO:0042518 | negative regulation of tyrosine phosphorylation of Stat3 protein                          | 3           | 1          | 0.00348 | 0.01982 | [PPP2R1A]               |
| GO:0019932 | second-messenger-mediated signaling                                                       | 3           | 1          | 0.00348 | 0.01982 | [PPP2R1A]               |
| GO:0006268 | DNA unwinding involved in replication                                                     | 3           | 1          | 0.00348 | 0.01982 | [HMGA1]                 |
| GO:0006364 | rRNA processing                                                                           | 80          | 2          | 0.00395 | 0.01719 | [PDCD11, PES1]          |
| GO:0043248 | proteasome assembly                                                                       | 4           | 1          | 0.00464 | 0.01856 | [PSMG2]                 |
| GO:2000774 | positive regulation of cellular senescence                                                | 4           | 1          | 0.00464 | 0.01856 | [HMGA1]                 |
| GO:0006379 | mRNA cleavage                                                                             | 5           | 1          | 0.0058  | 0.02093 | [CPSF1]                 |
| GO:0031576 | G2/M transition checkpoint                                                                | 5           | 1          | 0.0058  | 0.02093 | [OBFC2A]                |
| GO:0000398 | nuclear mRNA splicing, via spliceosome                                                    | 98          | 2          | 0.00586 | 0.01971 | [CWC15, PRPF8]          |
| GO:0006584 | catecholamine metabolic process                                                           | 6           | 1          | 0.00695 | 0.02237 | [MAOA]                  |
| GO:0030111 | regulation of Wnt receptor signaling pathway                                              | 7           | 1          | 0.00811 | 0.02352 | [PPP2R1A]               |
| GO:0000188 | inactivation of MAPK activity                                                             | 7           | 1          | 0.00811 | 0.02352 | [PPP2R1A]               |
| GO:0006275 | regulation of DNA replication                                                             | 7           | 1          | 0.00811 | 0.02352 | [PPP2R1A]               |
| GO:0042135 | neurotransmitter catabolic process                                                        | 7           | 1          | 0.00811 | 0.02352 | [MAOA]                  |
| GO:0006672 | ceramide metabolic process                                                                | 9           | 1          | 0.01041 | 0.02751 | [PPP2R1A]               |

|            |                                                         |     |   |         |         |                  |
|------------|---------------------------------------------------------|-----|---|---------|---------|------------------|
| GO:0042273 | ribosomal large subunit biogenesis                      | 10  | 1 | 0.01156 | 0.029   | [PES1]           |
| GO:0006378 | mRNA polyadenylation                                    | 10  | 1 | 0.01156 | 0.029   | [CPSF1]          |
| GO:0045022 | early endosome to late endosome transport               | 11  | 1 | 0.01271 | 0.03034 | [EEA1]           |
| GO:0006281 | DNA repair                                              | 147 | 2 | 0.01276 | 0.02951 | [OBFC2A, RUVBL1] |
| GO:0071108 | protein K48-linked deubiquitination                     | 12  | 1 | 0.01386 | 0.02972 | [USP5]           |
| GO:0043968 | histone H2A acetylation                                 | 12  | 1 | 0.01386 | 0.02972 | [RUVBL1]         |
| GO:0006284 | base-excision repair                                    | 12  | 1 | 0.01386 | 0.02972 | [HMGA1]          |
| GO:0010033 | response to organic substance                           | 12  | 1 | 0.01386 | 0.02972 | [PPP2R1A]        |
| GO:0006325 | chromatin organization                                  | 15  | 1 | 0.01729 | 0.03367 | [HMGN2]          |
| GO:0007031 | peroxisome organization                                 | 15  | 1 | 0.01729 | 0.03367 | [PEX11B]         |
| GO:0006952 | defense response                                        | 15  | 1 | 0.01729 | 0.03367 | [MLF2]           |
| GO:0045595 | regulation of cell differentiation                      | 16  | 1 | 0.01843 | 0.0341  | [PPP2R1A]        |
| GO:0043967 | histone H4 acetylation                                  | 17  | 1 | 0.01958 | 0.03533 | [RUVBL1]         |
| GO:0030155 | regulation of cell adhesion                             | 18  | 1 | 0.02072 | 0.0365  | [PPP2R1A]        |
| GO:0007160 | cell-matrix adhesion                                    | 19  | 1 | 0.02185 | 0.03761 | [THBS3]          |
| GO:0051726 | regulation of cell cycle                                | 22  | 1 | 0.02526 | 0.04201 | [PES1]           |
| GO:0000375 | RNA splicing, via transesterification reactions         | 22  | 1 | 0.02526 | 0.04201 | [PRPF8]          |
| GO:0000724 | double-strand break repair via homologous recombination | 25  | 1 | 0.02866 | 0.0461  | [OBFC2A]         |
| GO:0010212 | response to ionizing radiation                          | 27  | 1 | 0.03091 | 0.04867 | [OBFC2A]         |
| GO:0006470 | protein dephosphorylation                               | 37  | 1 | 0.04212 | 0.06494 | [PPP2R1A]        |
| GO:0006869 | lipid transport                                         | 46  | 1 | 0.05211 | 0.07869 | [SPNS1]          |
| GO:0045893 | positive regulation of transcription, DNA-dependent     | 334 | 2 | 0.05768 | 0.08537 | [HMGA1, ZXDC]    |
| GO:0007059 | chromosome segregation                                  | 55  | 1 | 0.06198 | 0.08994 | [PPP2R1A]        |
| GO:0030308 | negative regulation of cell growth                      | 58  | 1 | 0.06525 | 0.09286 | [PPP2R1A]        |
| GO:0006417 | regulation of translation                               | 59  | 1 | 0.06634 | 0.09263 | [GCN1L1]         |
| GO:0015031 | protein transport                                       | 383 | 2 | 0.07323 | 0.10036 | [RAB1A, SCAMP2]  |
| GO:0006310 | DNA recombination                                       | 73  | 1 | 0.08144 | 0.10957 | [RUVBL1]         |
| GO:0006917 | induction of apoptosis                                  | 79  | 1 | 0.08784 | 0.11607 | [PPP2R1A]        |
| GO:0006897 | endocytosis                                             | 83  | 1 | 0.09208 | 0.11954 | [EEA1]           |
| GO:0008283 | cell proliferation                                      | 90  | 1 | 0.09945 | 0.12688 | [PES1]           |
| GO:0006974 | response to DNA damage stimulus                         | 93  | 1 | 0.10259 | 0.12867 | [OBFC2A]         |
| GO:0008285 | negative regulation of cell proliferation               | 102 | 1 | 0.11195 | 0.13808 | [HMGA1]          |
| GO:0016192 | vesicle-mediated transport                              | 104 | 1 | 0.11402 | 0.13832 | [RAB1A]          |
| GO:0009615 | response to virus                                       | 114 | 1 | 0.12429 | 0.14834 | [HMGA1]          |
| GO:0007165 | signal transduction                                     | 141 | 1 | 0.15143 | 0.17787 | [PEX11B]         |



|            |                                                     |      |   |         |         |                        |
|------------|-----------------------------------------------------|------|---|---------|---------|------------------------|
| GO:0007067 | mitosis                                             | 159  | 1 | 0.16906 | 0.19548 | [RUVBL1]               |
| GO:0006355 | regulation of transcription, DNA-dependent          | 1254 | 3 | 0.17842 | 0.20312 | [HMGN2, PPP2R1A, RRN3] |
| GO:0006468 | protein phosphorylation                             | 185  | 1 | 0.1939  | 0.21741 | [CSNK1E]               |
| GO:0016568 | chromatin modification                              | 221  | 1 | 0.2271  | 0.25082 | [RUVBL1]               |
| GO:0045892 | negative regulation of transcription, DNA-dependent | 284  | 1 | 0.28199 | 0.30687 | [HMGA1]                |
| GO:0051301 | cell division                                       | 285  | 1 | 0.28283 | 0.30333 | [RUVBL1]               |
| GO:0044419 | interspecies interaction between organisms          | 315  | 1 | 0.30758 | 0.32516 | [HMGA1]                |
| GO:0007049 | cell cycle                                          | 405  | 1 | 0.37692 | 0.39284 | [RUVBL1]               |
| GO:0007155 | cell adhesion                                       | 420  | 1 | 0.38779 | 0.39856 | [THBS3]                |
| GO:0006508 | proteolysis                                         | 476  | 1 | 0.42677 | 0.43261 | [USP5]                 |
| GO:0008150 | biological_process                                  | 588  | 1 | 0.49756 | 0.49756 | [RPUSD1]               |

---

Table S13-12. GO annotation analysis of the module eigengene in 13 postnatal highly LT-specific modules (LT\_violet).

| GO ID      | GO Name                                                                                  | Total Count | Diff Count | P Value     | FDR         | Gene                              |
|------------|------------------------------------------------------------------------------------------|-------------|------------|-------------|-------------|-----------------------------------|
| GO:0006364 | rRNA processing                                                                          | 80          | 5          | 1.82029E-08 | 1.32881E-06 | [BOP1, DKC1, LSM6, PA2G4, UTP11L] |
| GO:0043065 | positive regulation of apoptotic process                                                 | 83          | 3          | 8.16646E-05 | 0.002980758 | [MLLT11, MTCH1, RHOB]             |
| GO:0000184 | nuclear-transcribed mRNA catabolic process, nonsense-mediated decay                      | 27          | 2          | 0.000339315 | 0.008256659 | [DCP1A, RBM8A]                    |
| GO:0042823 | pyridoxal phosphate biosynthetic process                                                 | 1           | 1          | 0.001002529 | 0.012197437 | [PDXK]                            |
| GO:0090343 | positive regulation of cell aging                                                        | 1           | 1          | 0.001002529 | 0.012197437 | [LMNA]                            |
| GO:0051901 | positive regulation of mitochondrial depolarization                                      | 1           | 1          | 0.001002529 | 0.012197437 | [MLLT11]                          |
| GO:0042816 | vitamin B6 metabolic process                                                             | 1           | 1          | 0.001002529 | 0.012197437 | [PDXK]                            |
| GO:0034553 | mitochondrial respiratory chain complex II assembly                                      | 1           | 1          | 0.001002529 | 0.012197437 | [SDHAF1]                          |
| GO:0007050 | cell cycle arrest                                                                        | 52          | 2          | 0.001261613 | 0.010233082 | [GADD45A, TBRG4]                  |
| GO:0006417 | regulation of translation                                                                | 59          | 2          | 0.001620686 | 0.011831008 | [PA2G4, RBM8A]                    |
| GO:0051028 | mRNA transport                                                                           | 60          | 2          | 0.001675506 | 0.011119267 | [NUP188, NUP88]                   |
| GO:0045743 | positive regulation of fibroblast growth factor receptor signaling pathway               | 2           | 1          | 0.002004076 | 0.011253657 | [NPTN]                            |
| GO:0045161 | neuronal ion channel clustering                                                          | 2           | 1          | 0.002004076 | 0.011253657 | [MTCH1]                           |
| GO:0006927 | transformed cell apoptosis                                                               | 2           | 1          | 0.002004076 | 0.011253657 | [RHOB]                            |
| GO:0000463 | maturation of LSU-rRNA from tricistronic rRNA transcript (SSU-rRNA, 5.8S rRNA, LSU-rRNA) | 3           | 1          | 0.003004642 | 0.014150892 | [BOP1]                            |
| GO:0043985 | histone H4-R3 methylation                                                                | 3           | 1          | 0.003004642 | 0.014150892 | [PRMT5]                           |
| GO:0008283 | cell proliferation                                                                       | 90          | 2          | 0.003719618 | 0.015972477 | [BOP1, PDXK]                      |
| GO:0060291 | long-term synaptic potentiation                                                          | 4           | 1          | 0.004004227 | 0.015800462 | [NPTN]                            |
| GO:0018216 | peptidyl-arginine methylation                                                            | 4           | 1          | 0.004004227 | 0.015800462 | [PRMT5]                           |
| GO:0042535 | positive regulation of tumor necrosis factor biosynthetic process                        | 5           | 1          | 0.005002832 | 0.018260339 | [THBS1]                           |
| GO:0000080 | G1 phase of mitotic cell cycle                                                           | 6           | 1          | 0.00600046  | 0.020858741 | [TBRG4]                           |
| GO:0015031 | protein transport                                                                        | 383         | 3          | 0.006701156 | 0.022235654 | [NUP188, NUP88, RHOB]             |
| GO:0000387 | spliceosomal snRNP assembly                                                              | 7           | 1          | 0.006997109 | 0.021735702 | [PRMT5]                           |
| GO:0016226 | iron-sulfur cluster assembly                                                             | 7           | 1          | 0.006997109 | 0.021735702 | [SDHAF1]                          |
| GO:0070301 | cellular response to hydrogen peroxide                                                   | 8           | 1          | 0.007992783 | 0.022881299 | [RHOB]                            |
| GO:0033205 | cell cycle cytokinesis                                                                   | 8           | 1          | 0.007992783 | 0.022881299 | [RHOB]                            |
| GO:0007155 | cell adhesion                                                                            | 420         | 3          | 0.008619396 | 0.023304294 | [MYBPH, NPTN, RHOB]               |

|            |                                                                                           |     |   |             |                                |
|------------|-------------------------------------------------------------------------------------------|-----|---|-------------|--------------------------------|
| GO:0090200 | positive regulation of release of cytochrome c from mitochondria                          | 9   | 1 | 0.00898748  | 0.023431644 [MLLT11]           |
| GO:0006397 | mRNA processing                                                                           | 144 | 2 | 0.009240731 | 0.02326115 [LSM6, ZRANB2]      |
| GO:0007266 | Rho protein signal transduction                                                           | 10  | 1 | 0.009981203 | 0.023889436 [RHOB]             |
| GO:0009966 | regulation of signal transduction                                                         | 10  | 1 | 0.009981203 | 0.023889436 [MTCH1]            |
| GO:0008380 | RNA splicing                                                                              | 150 | 2 | 0.00999166  | 0.022793475 [LSM6, ZRANB2]     |
| GO:0034504 | protein localization to nucleus                                                           | 11  | 1 | 0.010973952 | 0.023561719 [LMNA]             |
| GO:0071479 | cellular response to ionizing radiation                                                   | 11  | 1 | 0.010973952 | 0.023561719 [RHOB]             |
| GO:0045333 | cellular respiration                                                                      | 11  | 1 | 0.010973952 | 0.023561719 [TBRG4]            |
| GO:0008333 | endosome to lysosome transport                                                            | 14  | 1 | 0.013946365 | 0.028280128 [RHOB]             |
| GO:0010976 | positive regulation of neuron projection development                                      | 18  | 1 | 0.017896005 | 0.035308334 [NPTN]             |
| GO:0051897 | positive regulation of protein kinase B signaling cascade                                 | 20  | 1 | 0.019865023 | 0.038161755 [THBS1]            |
| GO:0071456 | cellular response to hypoxia                                                              | 21  | 1 | 0.020848085 | 0.038529372 [LMNA]             |
| GO:0001934 | positive regulation of protein phosphorylation                                            | 21  | 1 | 0.020848085 | 0.038529372 [NPTN]             |
| GO:0042254 | ribosome biogenesis                                                                       | 22  | 1 | 0.021830183 | 0.038400081 [BOP1]             |
| GO:0051726 | regulation of cell cycle                                                                  | 22  | 1 | 0.021830183 | 0.038400081 [BOP1]             |
| GO:0045786 | negative regulation of cell cycle                                                         | 24  | 1 | 0.023791492 | 0.040390208 [RHOB]             |
| GO:0043154 | negative regulation of cysteine-type endopeptidase activity involved in apoptotic process | 25  | 1 | 0.024770705 | 0.041096852 [THBS1]            |
| GO:0007204 | elevation of cytosolic calcium ion concentration                                          | 28  | 1 | 0.027702588 | 0.044939754 [NPTN]             |
| GO:0016525 | negative regulation of angiogenesis                                                       | 29  | 1 | 0.028677967 | 0.045510687 [THBS1]            |
| GO:0006919 | activation of cysteine-type endopeptidase activity involved in apoptotic process          | 32  | 1 | 0.031598369 | 0.048561704 [MTCH1]            |
| GO:0008152 | metabolic process                                                                         | 32  | 1 | 0.031598369 | 0.048561704 [MCAT]             |
| GO:0045766 | positive regulation of angiogenesis                                                       | 34  | 1 | 0.033540535 | 0.049968552 [RHOB]             |
| GO:0007517 | muscle organ development                                                                  | 38  | 1 | 0.037413454 | 0.054082814 [LMNA]             |
| GO:0042493 | response to drug                                                                          | 38  | 1 | 0.037413454 | 0.054082814 [THBS1]            |
| GO:0006633 | fatty acid biosynthetic process                                                           | 42  | 1 | 0.041271204 | 0.057386626 [MCAT]             |
| GO:0071260 | cellular response to mechanical stimulus                                                  | 42  | 1 | 0.041271204 | 0.057386626 [GADD45A]          |
| GO:0006631 | fatty acid metabolic process                                                              | 50  | 1 | 0.048941429 | 0.066161562 [HSD17B4]          |
| GO:0008033 | tRNA processing                                                                           | 59  | 1 | 0.05749876  | 0.076316536 [LSM6]             |
| GO:0006810 | transport                                                                                 | 395 | 2 | 0.059667716 | 0.07778113 [MTCH1, RBM8A]      |
| GO:0006457 | protein folding                                                                           | 68  | 1 | 0.065980829 | 0.084501763 [FKBP5]            |
| GO:0006917 | induction of apoptosis                                                                    | 79  | 1 | 0.076246537 | 0.095965469 [THBS1]            |
| GO:0006811 | ion transport                                                                             | 455 | 2 | 0.07630406  | 0.094410108 [ATP6V0D2, KCNAB1] |

|            |                                                     |      |   |             |                              |
|------------|-----------------------------------------------------|------|---|-------------|------------------------------|
| GO:0000398 | nuclear mRNA splicing, via spliceosome              | 98   | 1 | 0.093719097 | 0.114024902 [RBM8A]          |
| GO:0008284 | positive regulation of cell proliferation           | 102  | 1 | 0.097356161 | 0.115560971 [TBRG4]          |
| GO:0006813 | potassium ion transport                             | 102  | 1 | 0.097356161 | 0.115560971 [KCNAB1]         |
| GO:0006950 | response to stress                                  | 104  | 1 | 0.099169339 | 0.114910504 [HSPA6]          |
| GO:0043066 | negative regulation of apoptotic process            | 118  | 1 | 0.111762303 | 0.127478877 [THBS1]          |
| GO:0008150 | biological_process                                  | 588  | 2 | 0.117465888 | 0.131923228 [CCDC6, SLC35D2] |
| GO:0007399 | nervous system development                          | 214  | 1 | 0.193597001 | 0.214130017 [NPTN]           |
| GO:0016568 | chromatin modification                              | 221  | 1 | 0.199267057 | 0.217111868 [PRMT5]          |
| GO:0044419 | interspecies interaction between organisms          | 315  | 1 | 0.271735746 | 0.291716315 [PSMB7]          |
| GO:0006915 | apoptotic process                                   | 321  | 1 | 0.276137179 | 0.292145131 [RHOB]           |
| GO:0045893 | positive regulation of transcription, DNA-dependent | 334  | 1 | 0.285584622 | 0.297823963 [MLLT11]         |
| GO:0030154 | cell differentiation                                | 484  | 1 | 0.386245282 | 0.39712543 [RHOB]            |
| GO:0007275 | multicellular organismal development                | 822  | 1 | 0.564954843 | 0.572801438 [RHOB]           |
| GO:0006355 | regulation of transcription, DNA-dependent          | 1254 | 1 | 1           | 1 [PRMT5]                    |

---

Table S13-13. GO annotation analysis of the module eigengene in 13 postnatal highly LT-specific modules (LT\_yellowgreen).

| GO ID      | GO Name                                                                                   | Total Count | Diff Count | P Value | FDR   | Gene              |
|------------|-------------------------------------------------------------------------------------------|-------------|------------|---------|-------|-------------------|
| GO:0001896 | autolysis                                                                                 | 1           | 1          | 0.00023 | 0.003 | [CAPN3]           |
| GO:0033234 | negative regulation of protein sumoylation                                                | 1           | 1          | 0.00023 | 0.003 | [CAPN3]           |
| GO:0014850 | response to muscle activity                                                               | 1           | 1          | 0.00023 | 0.003 | [CAPN3]           |
| GO:0014718 | positive regulation of satellite cell activation involved in skeletal muscle regeneration | 1           | 1          | 0.00023 | 0.003 | [CAPN3]           |
| GO:0061061 | muscle structure development                                                              | 1           | 1          | 0.00023 | 0.003 | [CAPN3]           |
| GO:0030239 | myofibril assembly                                                                        | 2           | 1          | 0.00046 | 0.002 | [CAPN3]           |
| GO:0071472 | cellular response to salt stress                                                          | 2           | 1          | 0.00046 | 0.002 | [CAPN3]           |
| GO:0045214 | sarcomere organization                                                                    | 2           | 1          | 0.00046 | 0.002 | [CAPN3]           |
| GO:0014733 | regulation of skeletal muscle adaptation                                                  | 2           | 1          | 0.00046 | 0.002 | [CAMK2G]          |
| GO:0072657 | protein localization in membrane                                                          | 2           | 1          | 0.00046 | 0.002 | [CAPN3]           |
| GO:0050790 | regulation of catalytic activity                                                          | 3           | 1          | 0.00068 | 0.002 | [CAPN3]           |
| GO:0046716 | muscle cell homeostasis                                                                   | 4           | 1          | 0.00091 | 0.003 | [CAPN3]           |
| GO:0051281 | positive regulation of release of sequestered calcium ion into cytosol                    | 4           | 1          | 0.00091 | 0.003 | [CAPN3]           |
| GO:0043122 | regulation of I-kappaB kinase/NF-kappaB cascade                                           | 4           | 1          | 0.00091 | 0.003 | [CAPN3]           |
| GO:0030073 | insulin secretion                                                                         | 6           | 1          | 0.00137 | 0.003 | [CAMK2G]          |
| GO:0051924 | regulation of calcium ion transport                                                       | 7           | 1          | 0.00159 | 0.004 | [CAMK2G]          |
| GO:0045862 | positive regulation of proteolysis                                                        | 7           | 1          | 0.00159 | 0.004 | [CAPN3]           |
| GO:0051592 | response to calcium ion                                                                   | 10          | 1          | 0.00228 | 0.005 | [CAPN3]           |
| GO:0035329 | hippo signaling cascade                                                                   | 11          | 1          | 0.0025  | 0.005 | [TEAD1]           |
| GO:0071277 | cellular response to calcium ion                                                          | 15          | 1          | 0.00341 | 0.006 | [CAPN3]           |
| GO:0006810 | transport                                                                                 | 395         | 2          | 0.00347 | 0.006 | [SLC25A30, VLDLR] |
| GO:0071456 | cellular response to hypoxia                                                              | 21          | 1          | 0.00477 | 0.008 | [NPEPPS]          |
| GO:0006508 | proteolysis                                                                               | 476         | 2          | 0.00499 | 0.008 | [CAPN3, NPEPPS]   |
| GO:0008203 | cholesterol metabolic process                                                             | 24          | 1          | 0.00546 | 0.009 | [VLDLR]           |
| GO:0006461 | protein complex assembly                                                                  | 33          | 1          | 0.00749 | 0.011 | [CAPN3]           |
| GO:0008202 | steroid metabolic process                                                                 | 36          | 1          | 0.00817 | 0.012 | [VLDLR]           |
| GO:0007517 | muscle organ development                                                                  | 38          | 1          | 0.00863 | 0.012 | [CAPN3]           |
| GO:0051092 | positive regulation of NF-kappaB transcription factor activity                            | 45          | 1          | 0.01021 | 0.014 | [CAPN3]           |
| GO:0006869 | lipid transport                                                                           | 46          | 1          | 0.01043 | 0.014 | [VLDLR]           |
| GO:0007010 | cytoskeleton organization                                                                 | 71          | 1          | 0.01606 | 0.02  | [NCKIPSD]         |

|            |                                                     |     |   |         |       |          |
|------------|-----------------------------------------------------|-----|---|---------|-------|----------|
| GO:0043066 | negative regulation of apoptotic process            | 118 | 1 | 0.02657 | 0.033 | [CAPN3]  |
| GO:0006468 | protein phosphorylation                             | 185 | 1 | 0.04137 | 0.049 | [CAMK2G] |
| GO:0007399 | nervous system development                          | 214 | 1 | 0.04771 | 0.055 | [CAMK2G] |
| GO:0045892 | negative regulation of transcription, DNA-dependent | 284 | 1 | 0.06286 | 0.07  | [CAPN3]  |
| GO:0006915 | apoptotic process                                   | 321 | 1 | 0.07079 | 0.077 | [CAPN3]  |
| GO:0045893 | positive regulation of transcription, DNA-dependent | 334 | 1 | 0.07355 | 0.078 | [CAPN3]  |
| GO:0030154 | cell differentiation                                | 484 | 1 | 0.10497 | 0.108 | [CAMK2G] |
| GO:0007275 | multicellular organismal development                | 822 | 1 | 0.17228 | 0.172 | [CAMK2G] |

---
